# Supplementary material for: Dehydration stress extends mRNA 3′ untranslated regions with noncoding RNA functions in Arabidopsis
Source: HighWire-hosted journal article supplement (doi:10.1101/gr.218669.116), 2017-05-18
Supplement: Supplemental_Data_S2.docx [file Supplemental_Data_S2.docx]

**Supplemental Data 2.** Supplemental Methods.

**Plant materials, growth conditions and treatments**

The *Arabidopsis thaliana* ecotype Columbia (Col-0) was used as wild type in this study. The T-DNA insertion lines *spl2* (WiscDsLoxHs077_05E), *naxt1-1* (SALK_091226), *famt* (SALK_119380) were obtained from the Arabidopsis Biological Resource Center (ABRC, Ohio State University) and their mutant genotypes were verified using primers listed in Supplementary Table 7. The *naxt1-1* and *fpa-7* mutant has been described previously ([Segonzac et al. 2007](#_ENREF_8); [Veley and Michaels 2008](#_ENREF_11)). All mutants are in Col-0 background.

For all experiments, sterilized and stratified seeds were grown on Murashige and Skoog (MS) medium (pH 5.7) with 1% sucrose (Fisher Scientific) and 0.8% (wt/vol) Bacto-Agar (Becton, Dickinson and company), and were grown at 22°C under 16 hour light / 8 hour dark condition with a light intensity of 40 µmol m-2 s-1. (±)-Abscisic acid (ABA, Sigma) stock solution was prepared in methanol.

For ABA and dehydration treatment, 13-day-old seedlings grown on MS solid medium were transferred to MS liquid medium (pH 5.7) with 1% sucrose and grown under same condition for an additional day before treatments. For ABA treatment, 14-day-old seedlings were treated with 20 µM ABA in MS liquid medium under light condition (40 µmol m-2 s-1) and seedlings were harvested at 1 and 3 hours after application. For dehydration treatment, 14-day-old seedlings were removed from MS liquid medium and left on filter papers (Fisher Scientific) under light condition (40 µmol m-2 s-1) for up to 1 and 3 hours before harvesting. The negative control samples were harvested before ABA and dehydration treatment.

**RNA extraction, library construction, and sequencing for ssRNA-seq**

Total RNA was extracted from *Arabidopsis* seedlings using TRIzol reagent (Ambion), treated with TURBO DNase (Ambion) and purified using RNeasy mini spin column (Qiagen). The quality of purified RNA was assessed using an Agilent 2100 Bioanalyzer. cDNA libraries for ssRNA-seq were prepared using the Illumina TruSeq Stranded mRNA Sample Preparation Kit according to the low sample protocol guidelines. The quality and size of each sample library was assessed using an Agilent High Sensitivity D1K ScreenTape System. The average sizes of the enriched cDNA fragments were between 272 and 300 bp. The three biological replicates for each condition (negative control, ABA 1 h, ABA 3 h, dehydration 1 h and dehydration 3 h) were pooled into one well, and sequenced on an Illumina HiSeq 2500 with 100-cycle single reads per multiplexed sample.

**ssRNA-seq data analysis**

Strand-specific RNA-seq reads were mapped to the *Arabidopsis* genome (TAIR10) using TopHat (version 2.0.8) ([Kim et al. 2013](#_ENREF_3)) with parameters “--library-type=fr-firststrand -i 40 -I 5000 -g 1 --segment-length=20”. The mapped reads were assembled using Cufflinks (v2.1.1) ([Trapnell et al. 2013](#_ENREF_10)) with parameters “--library-type=fr-firststrand -I 5000 --min-intron-length=40” and with TAIR10 annotation as the reference ([Lamesch et al. 2012](#_ENREF_4)). At these steps we specify the intron size to 40-5,000 bp to improve the mapping accuracy of splice junctions, because 99.9% of TAIR10 annotated intron sequences are 40-5,000 bp in length. The assembled transcripts of each ssRNA-seq sample were merged and annotated using Cuffcompare (v2.1.1) ([Trapnell et al. 2013](#_ENREF_10)) with TAIR10 annotation as the reference. The expression levels of each gene were then calculated by the fragments per kilobase of exons per million fragments mapped (FPKM) using Cuffdiff (v2.1.1) ([Trapnell et al. 2013](#_ENREF_10)) with parameter “--library-type=fr-firststrand”. A 2-fold variance in FPKM, a *P* value less than 0.05 and an adjusted *P* value less than 0.1 were used as cutoffs to define differentially expressed genes. The *P* value and adjusted *P* value were calculated using DESeq2 ([Love et al. 2014](#_ENREF_6)). The transcriptome data sets were visualized using Integrative Genomics Viewer (IGV, version 2.1) ([Robinson et al. 2011](#_ENREF_7)).

All assembled intergenic transcription units were collected as lincRNA candidates. The candidates with length ≥ 200 nt and predicted ORF ≤ 100 amino acids were defined as lincRNAs ([Liu et al. 2012](#_ENREF_5)). ORFs were predicted using GenScan with *Arabidopsis* specific parameters ([Burge and Karlin 1997](#_ENREF_1)).

**Identification of 3' UTR extensions**

A computational pipeline was developed to identify stress-induced 5'/3' UTR extensions (Supplemental Fig. 3B). First, all intergenic regions (based on TAIR10 annotation) were extracted and ssRNA-seq reads that mapped to each intergenic region were collected. Second, the initial 5'/3' UTR extensions were contiguously assembled from the 3'/5' end of the intergenic region with a 10-nt resolution, respectively. The initial extension was able to extend to next 10-nt bin only if the FPKM of the assembled extension (FPKMext) ≥ 1 and the FPKM of the 10-nt bin (FPKMbin) ≥ 1. Third, the assembled transcript extension in stress condition was compared to that in normal condition, and only the overhangs were defined as final 5'/3' UTR extensions. The final extensions were kept if their length were at least 200 nt longer and their FPKM were at least 2-fold greater in stress condition than normal condition.

**Identification of sense mRNAs overlapped in sequences with extended 3' UTRs**

The overlapping regions between sense and antisense transcripts were identified by comparing the genomic loci of 3' UTR extensions to that of TAIR10 annotated genes. The 3' UTR extensions were defined as “antisense” transcripts, and the mRNAs of TAIR10 annotated genes were defined as “sense” transcripts. The sense and antisense transcripts are transcribed from opposite strands and have at least 50-nt-long overlapping region ([Wang et al. 2014](#_ENREF_12)).

**Poly(A) signal analysis**

The poly(A) signals and nucleotide composition at: (a) proximal cleavage sites of 1,409 transcripts with 3' UTR extensions; (b) distal cleavage sites of 1,409 transcripts with 3' UTR extensions; and (c) cleavage sites of expressed transcripts without 3' UTR extensions were analyzed. For (a) and (c), the 3' ends of TAIR10 annotated transcripts were used as cleavage sites. For (b), the 3' ends of extended 3' UTRs were used as cleavage sites. The sequences 50 nt upstream of transcript cleavage sites were extracted for poly(A) signal analysis, and the sequences 100 nt up- and downstream of transcript cleavage sites were extracted for nucleotide composition analysis, as previously reported ([Sherstnev et al. 2012](#_ENREF_9)). The AAUAAA-like motif refers to the canonical AAUAAA signal and 18 of single-nucleotide mutations.

**Reanalysis of DRS data sets**

DRS reads were mapped to the *Arabidopsis* genome (TAIR10) using HeliSphere software (version 1.1.498.63) with previously described parameters ([Duc et al. 2013](#_ENREF_2)). Poly(A) sites that were separated by less than 20 nt were merged. The abundance of each poly(A) site were calculated by reads per million (RPM). A 2-fold increase in RPM of distal poly(A) site, a *P* value less than 0.05 and an adjusted *P* value less than 0.1 were used as cutoffs to define 3' UTR extensions in *fpa-7* mutants compared to WT plants. The *P* value and adjusted *P* value were calculated using DESeq2 ([Love et al. 2014](#_ENREF_6)).

**RT-PCR analysis of gene expression**

Total RNA was isolated and purified as described above. For *NFYA5* and *SPL2*, gene-specific primers (Supplemental Table 7) were used for reverse transcription. For the other genes, oligo(dT)20 was used for reverse transcription. All reverse transcription was performed using Invitrogen SuperScript III reverse transcriptase, and the synthesized cDNAs were used as templates for semiquantitative PCR and real-time PCR analysis. Semiquantitative PCR products were amplified for no more than 32 cycles and *ACT2* *(AT3G18780)* served as a positive control. Real-time PCR was performed using SYBR Premix ExTaq (Takara) using gene-specific primers on the Bio-Rad CFX96 real-time system. Primers used in all RT-PCR experiments are listed in Supplemental Table 7.

**RNA gel blot analysis**

Total RNA was extracted from *Arabidopsis* seedlings using TRIzol reagent (Ambion). For RNA gel blot analysis, 15 μg of total RNA was electrophoresed on 1% agrose-formaldehyde gel and transferred to Amersham Hybond-N+ membrane (GE Healthcare). Bonded RNA were stained by methylene blue for loading verification and UV crossed linked in UV Stratalinker 2400 (Stratagene). Hybridization was performed overnight using Church buffer in HB-1000 Hybridizer hybridization oven (UVP, LLC) at 68°C and the membrane was then washed twice in 2×SSC, 0.1% SDS and twice in 0.2×SSC. 0.1% SDS. The 32P-labelled *ERF4* antisense riboprobe was prepared by *in vitro* transcription using T7 high yield RNA synthesis kit (New England BioLabs) from a PCR fragment, which was amplified from dehydration treated Col-0 cDNA samples using ERF4 pb FP (5’-agtctaaatttattaccagtttttag-3’) and ERF4 pb RP (5’-TGtaatacgactcactatagggAAATAGAGAAACAACATGGGGTG-3’) primers. The hybridization signal was visualized by Typhoon 9400 Variable Imager (Amersham Biosciences) and the signal intensity were measured using ImageJ software (National Institute of Health).

**REFERENCES**

Burge C, Karlin S. 1997. Prediction of complete gene structures in human genomic DNA. *Journal of molecular biology* **268**(1): 78-94.

Duc C, Sherstnev A, Cole C, Barton GJ, Simpson GG. 2013. Transcription termination and chimeric RNA formation controlled by Arabidopsis thaliana FPA. *PLoS Genet* **9**(10): e1003867.

Kim D, Pertea G, Trapnell C, Pimentel H, Kelley R, Salzberg SL. 2013. TopHat2: accurate alignment of transcriptomes in the presence of insertions, deletions and gene fusions. *Genome biology* **14**(4): R36.

Lamesch P, Berardini TZ, Li D, Swarbreck D, Wilks C, Sasidharan R, Muller R, Dreher K, Alexander DL, Garcia-Hernandez M et al. 2012. The Arabidopsis Information Resource (TAIR): improved gene annotation and new tools. *Nucleic acids research* **40**(Database issue): D1202-1210.

Liu J, Jung C, Xu J, Wang H, Deng S, Bernad L, Arenas-Huertero C, Chua NH. 2012. Genome-wide analysis uncovers regulation of long intergenic noncoding RNAs in Arabidopsis. *The Plant cell* **24**(11): 4333-4345.

Love MI, Huber W, Anders S. 2014. Moderated estimation of fold change and dispersion for RNA-seq data with DESeq2. *Genome biology* **15**(12): 550.

Robinson JT, Thorvaldsdottir H, Winckler W, Guttman M, Lander ES, Getz G, Mesirov JP. 2011. Integrative genomics viewer. *Nature biotechnology* **29**(1): 24-26.

Segonzac C, Boyer JC, Ipotesi E, Szponarski W, Tillard P, Touraine B, Sommerer N, Rossignol M, Gibrat R. 2007. Nitrate efflux at the root plasma membrane: identification of an Arabidopsis excretion transporter. *The Plant cell* **19**(11): 3760-3777.

Sherstnev A, Duc C, Cole C, Zacharaki V, Hornyik C, Ozsolak F, Milos PM, Barton GJ, Simpson GG. 2012. Direct sequencing of Arabidopsis thaliana RNA reveals patterns of cleavage and polyadenylation. *Nat Struct Mol Biol* **19**(8): 845-852.

Trapnell C, Hendrickson DG, Sauvageau M, Goff L, Rinn JL, Pachter L. 2013. Differential analysis of gene regulation at transcript resolution with RNA-seq. *Nature biotechnology* **31**(1): 46-53.

Veley KM, Michaels SD. 2008. Functional redundancy and new roles for genes of the autonomous floral-promotion pathway. *Plant physiology* **147**(2): 682-695.

Wang H, Chung PJ, Liu J, Jang IC, Kean MJ, Xu J, Chua NH. 2014. Genome-wide identification of long noncoding natural antisense transcripts and their responses to light in Arabidopsis. *Genome Res* **24**(3): 444-453.
