# Supplementary material for: Dehydration stress extends mRNA 3′ untranslated regions with noncoding RNA functions in Arabidopsis
Source: HighWire-hosted journal article supplement (doi:10.1101/gr.218669.116), 2017-05-18
Supplement: Supplemental_Fig_S1.pdf [file Supplemental_Fig_S1.pdf]

# Supplemental Figure 1

**A**

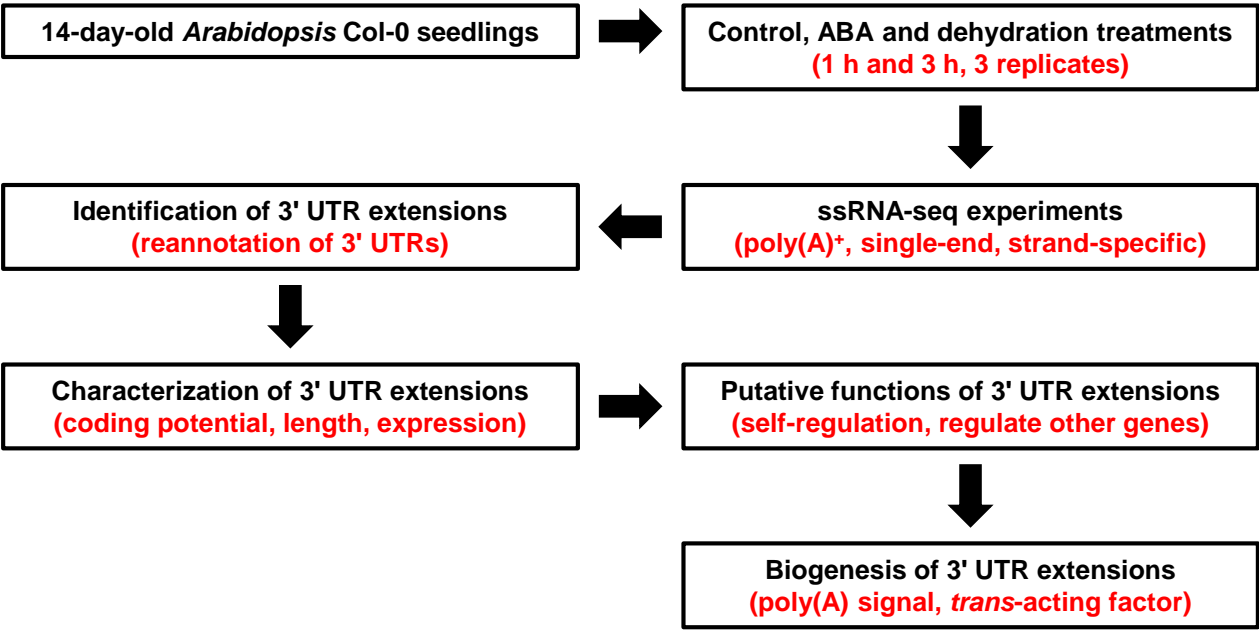

**B**

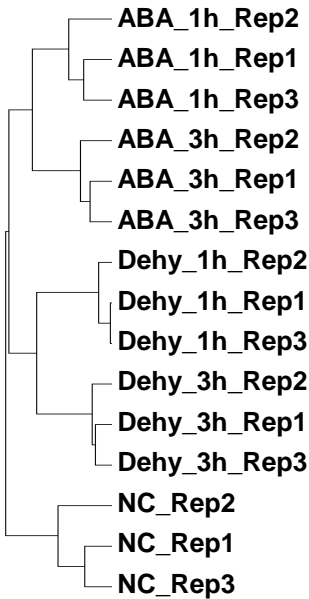

**C**

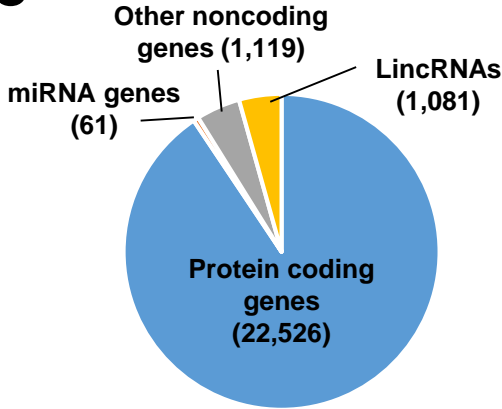

**Supplemental Figure 1. Global view of ssRNA-seq results.**

**(A)** Schematic diagram showing experimental procedure for the identification and functional analysis of stress-induced 3' UTR extensions. **(B)** Correlation analysis of all ssRNA-seq samples from normal condition (NC), ABA treatment for 1 h (ABA\_1h), ABA treatment for 3 h (ABA\_3h), dehydration stress for 1 h (Dehy\_1h) and dehydration stress for 3 h (Dehy\_3h). Hierarchical clustering of expression levels (FPKMs) of all detected genes segregates NC from ABA-treated and dehydration-stressed samples. **(C)** Composition of ssRNA-seq detected genes in all ssRNA-seq samples. Other noncoding genes are genes annotated as “transposable\_element\_gene”, “pseudogene”, “pre\_trna (tRNA)”, “small\_nucleolar\_rna (snoRNA)”, “ribosomal\_rna (rRNA)”, “small\_nuclear\_rna (snRNA)” and “other\_rna” by TAIR10.
