# Supplementary material for: Dehydration stress extends mRNA 3′ untranslated regions with noncoding RNA functions in Arabidopsis
Source: HighWire-hosted journal article supplement (doi:10.1101/gr.218669.116), 2017-05-18
Supplement: Supplemental_Fig_S2.pdf [file Supplemental_Fig_S2.pdf]

# Supplemental Figure 2

A

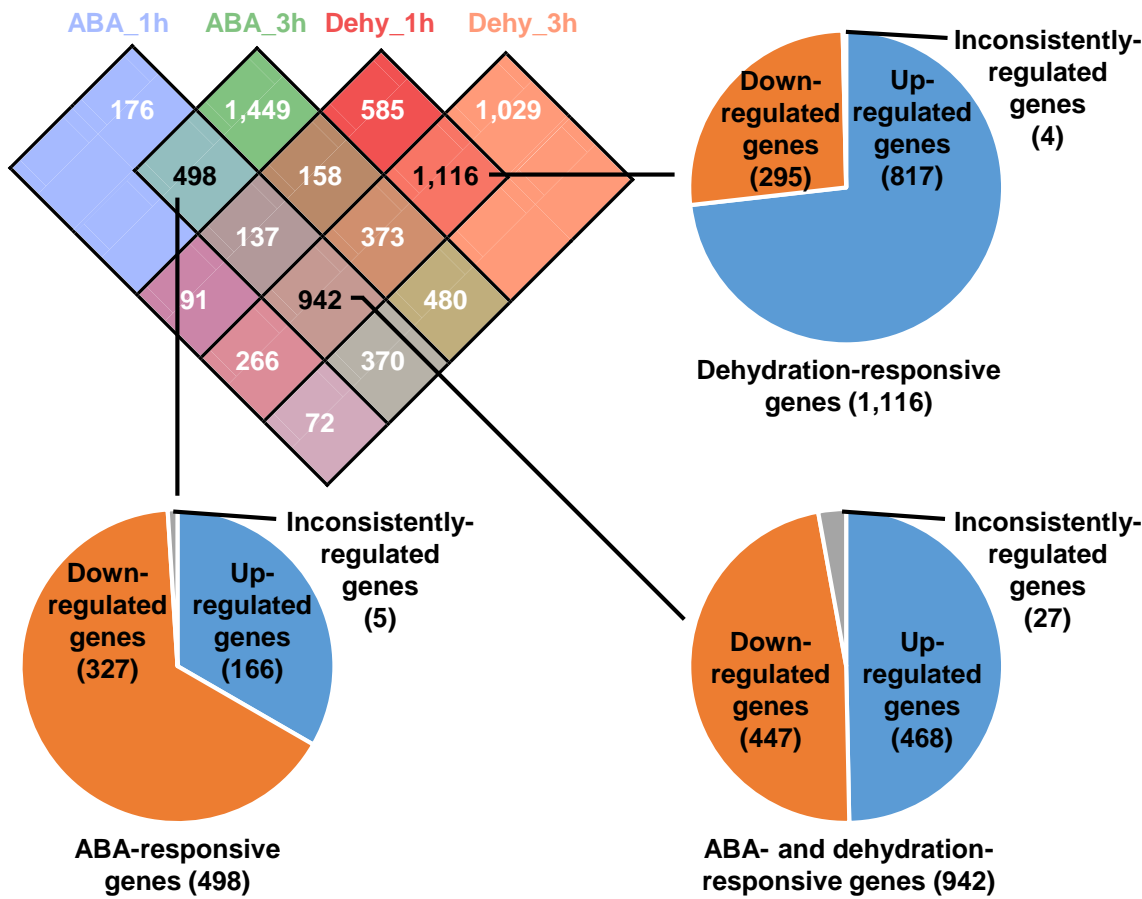

B

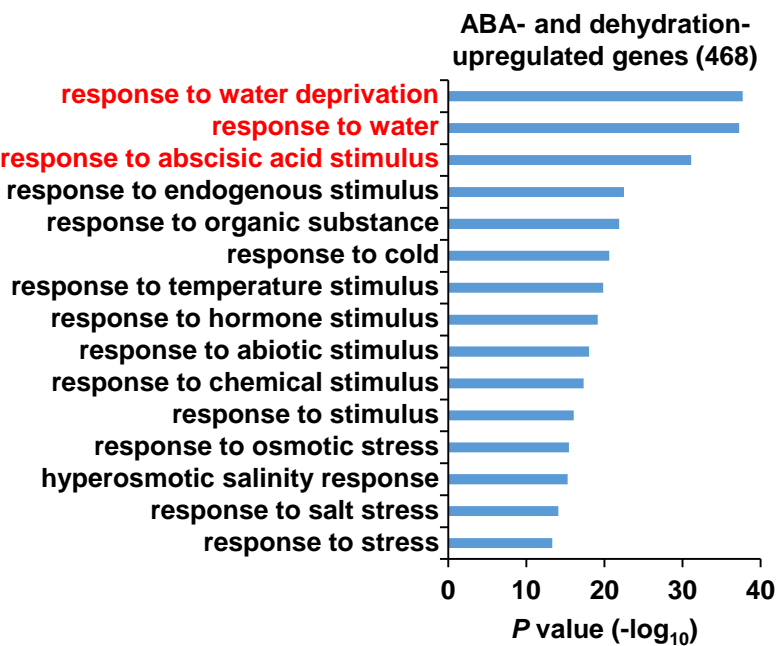

**Supplemental Figure 2. Functional analysis of differentially expressed protein coding genes.** (A) Venn diagram of differentially expressed protein coding genes (fold change  $\geq 2$  or  $\leq 0.5$ ,  $P$  value  $< 0.05$ ). The composition of ABA-responsive genes (differentially expressed in both ABA\_1h and ABA\_3h, lower-left), dehydration-responsive genes (differentially expressed in both Dehy\_1h and Dehy\_3h upper-right), and genes responsive to both ABA and dehydration treatments (differentially expressed in all stressed samples, lower-right) are shown as pie charts. (B) Gene Ontology (GO) enrichment analysis of 468 co-upregulated protein coding genes. Top 15 (with the lowest  $P$  values) enriched GO terms of biological process category are shown.
