# Supplementary material for: Dehydration stress extends mRNA 3′ untranslated regions with noncoding RNA functions in Arabidopsis
Source: HighWire-hosted journal article supplement (doi:10.1101/gr.218669.116), 2017-05-18
Supplement: Supplemental_Fig_S4.pdf [file Supplemental_Fig_S4.pdf]

# Supplemental Figure 4

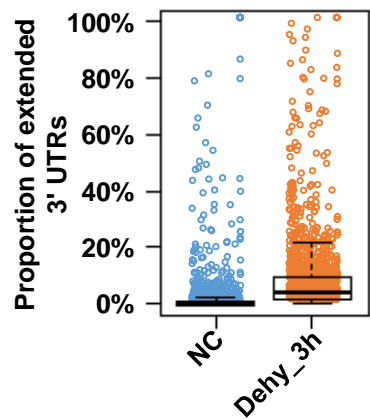

**Supplemental Figure 4. Proportion of extended 3' UTRs.** The proportion is defined as the FPKM of extended 3' UTR (long isoform) divided by the FPKM of total transcripts (short isoform + long isoform), ranging from 0% to 100%.
