# Supplementary material for: Dehydration stress extends mRNA 3′ untranslated regions with noncoding RNA functions in Arabidopsis
Source: HighWire-hosted journal article supplement (doi:10.1101/gr.218669.116), 2017-05-18
Supplement: Supplemental_Fig_S5.pdf [file Supplemental_Fig_S5.pdf]

# Supplemental Figure 5

A

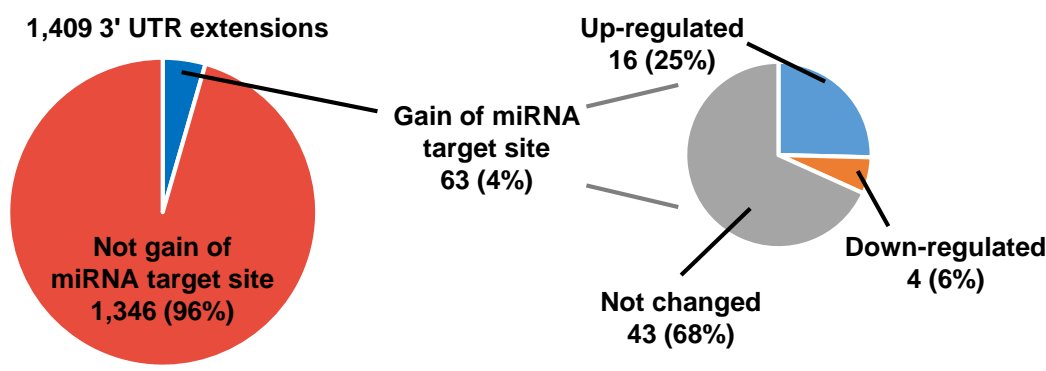

B

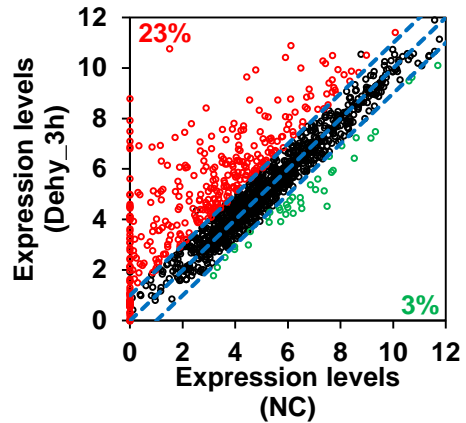

**Supplemental Figure 5. Absence of interaction between extended 3' UTRs and miRNAs.**  
**(A)** Composition of 3' UTR extensions with gain of miRNA target sites. The right-hand pie chart refers to the total transcript abundance including transcripts of short isoforms and long isoforms. The up- and down-regulation refers to their total transcript abundance in Dehy\_3h compared to NC. **(B)** Expression levels (FPKMs) of 1,409 mRNAs with 3' UTR extensions in normal condition (NC) and dehydration stress for 3 h (Dehy\_3h). The expression level refers to total transcript abundance including transcripts of short isoforms and long isoforms. The x-axis and y-axis represent log<sub>2</sub>-transformed FPKMs in NC and Dehy\_3h, respectively. Up-regulated genes, down-regulated genes and non-differentially expressed genes are shown in red, green and black, respectively.
