# Supplementary material for: Dehydration stress extends mRNA 3′ untranslated regions with noncoding RNA functions in Arabidopsis
Source: HighWire-hosted journal article supplement (doi:10.1101/gr.218669.116), 2017-05-18
Supplement: Supplemental_Fig_S6.pdf [file Supplemental_Fig_S6.pdf]

# Supplemental Figure 6

A

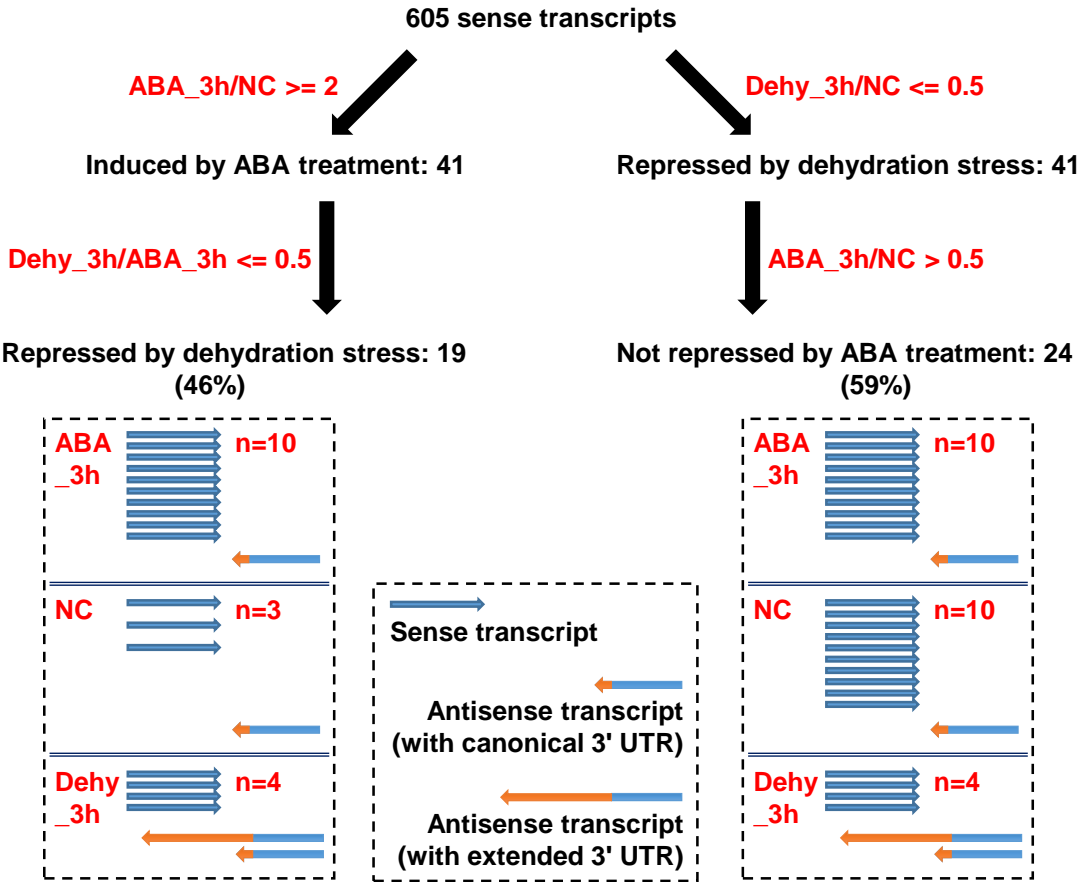

B

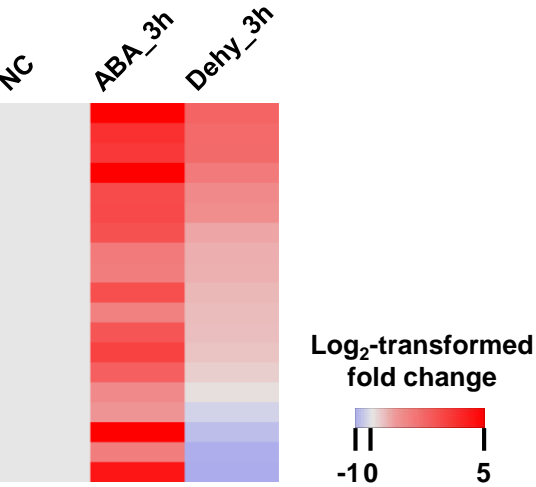

C

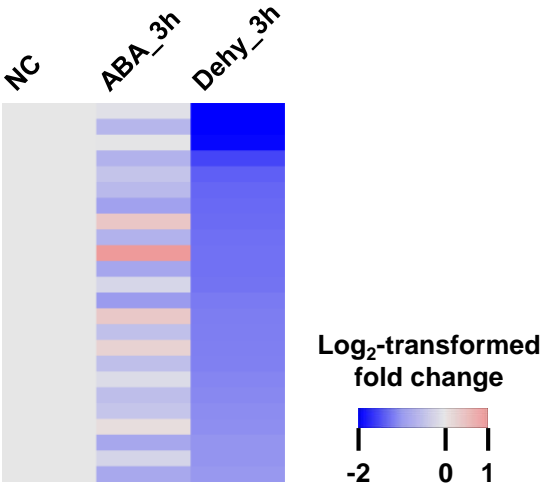

**Supplemental Figure 6. Repression of expression levels of sense genes by extended 3' UTRs.** (A) Schematic diagram showing experimental procedure for identification of sense transcripts repressed by extended 3' UTRs. Left, identification of 19 sense transcripts that are induced by ABA treatment (ABA\_3h/NC  $\geq 2$ ) and repressed by dehydration stress (Dehy\_3h/ABA\_3h  $\leq 0.5$ ). Right, identification of 24 sense transcripts that are repressed by dehydration stress (Dehy\_3h/NC  $\leq 0.5$ ) and not repressed by ABA treatment (ABA\_3h/NC  $> 0.5$ ). (B) Heatmap showing fold changes (relative to NC) of 19 sense genes that are upregulated in ABA treatment (ABA\_3h/NC  $\geq 2$ ) but downregulated in dehydration stress (Dehy\_3h/ABA\_3h  $\leq 0.5$ ). Blue and red represent log<sub>2</sub>-transformed fold changes  $< 0$  and  $> 0$ , respectively. (C) Heatmap showing fold changes (relative to NC) of 24 sense genes that are downregulated in dehydration stress (Dehy\_3h/NC  $\leq 0.5$ ) but not downregulated in ABA treatment (ABA\_3h/NC  $> 0.5$ ). Blue and red represent log<sub>2</sub>-transformed fold change  $< 0$  and  $> 0$ , respectively.
