# Supplementary material for: Dehydration stress extends mRNA 3′ untranslated regions with noncoding RNA functions in Arabidopsis
Source: HighWire-hosted journal article supplement (doi:10.1101/gr.218669.116), 2017-05-18
Supplement: Supplemental_Fig_S8.pdf [file Supplemental_Fig_S8.pdf]

# Supplemental Figure 8

A

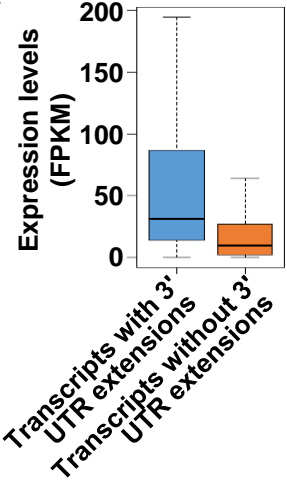

C

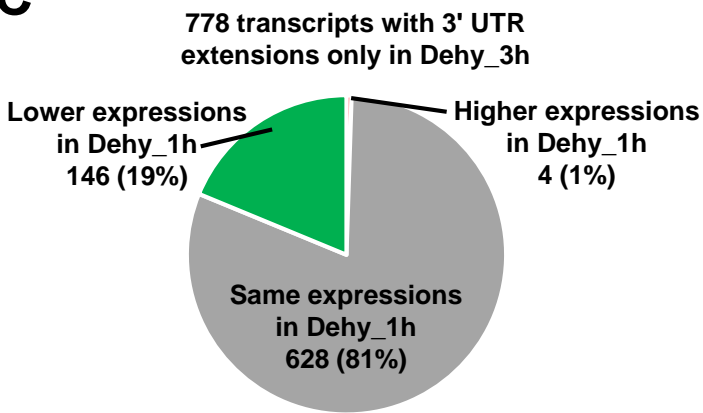

B

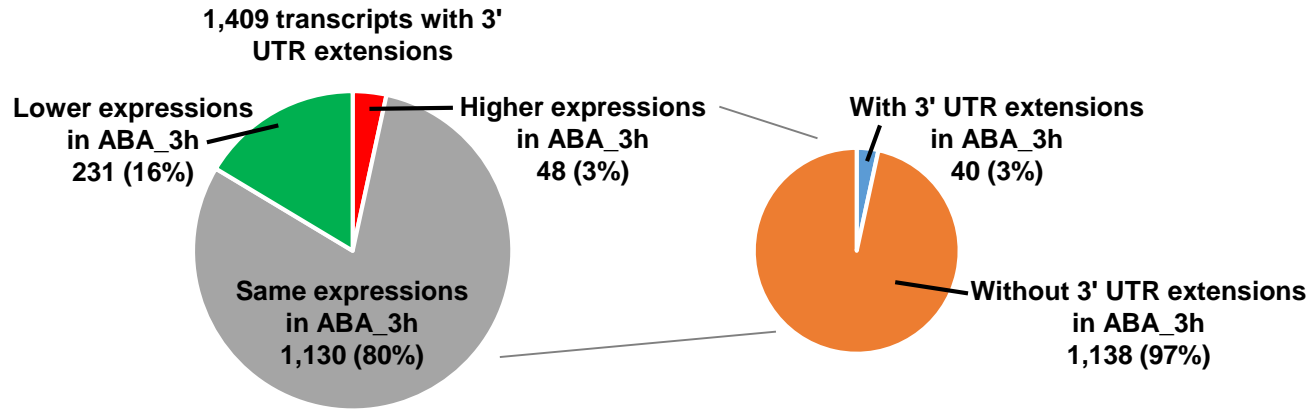

**Supplemental Figure 8. 3' UTR extensions are not induced by high expression levels.** (A) Overall expression levels of transcripts with 3' UTR extensions and those without 3' UTR extensions. (B) Composition of 1,409 transcripts with 3' UTR extensions that have the same or higher expression levels in ABA\_3h. (C) Composition of 778 transcripts that only have 3' UTR extensions in Dehy\_3h.
