# Supplementary material for: Dehydration stress extends mRNA 3′ untranslated regions with noncoding RNA functions in Arabidopsis
Source: HighWire-hosted journal article supplement (doi:10.1101/gr.218669.116), 2017-05-18
Supplement: Supplemental_Fig_S9.pdf [file Supplemental_Fig_S9.pdf]

# Supplemental Figure 9

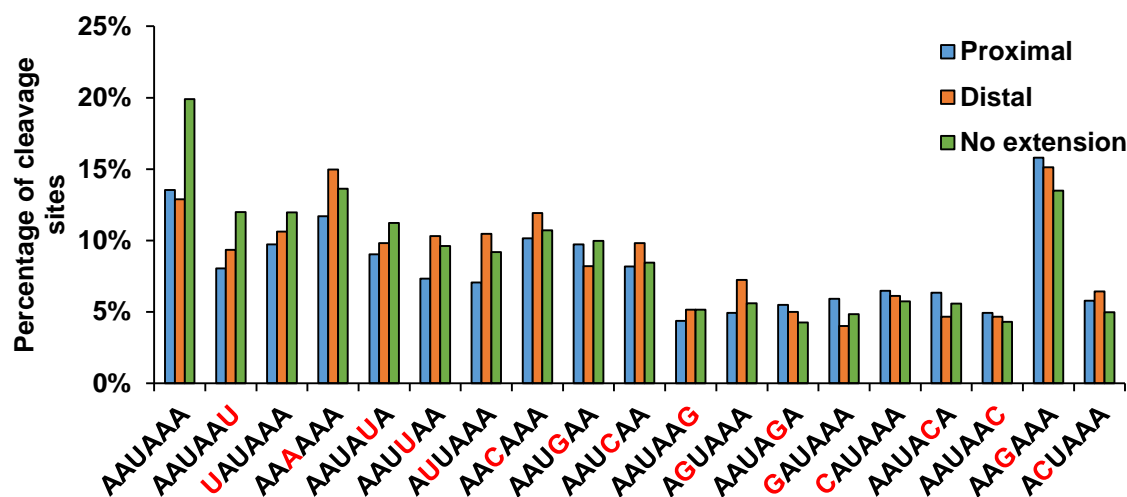

**Supplemental Figure 9. Composition of cleavage sites with AAUAAA-like motifs at upstream sequences.** AAUAAA-like motifs are defined as the canonical AAUAAA motif and 18 motifs with single nucleotide mutations (red). The sum total of all 19 motifs exceeds 100% because some cleavage sites contain more than one motif at their upstream sequences.
