# Supplementary material for: Dehydration stress extends mRNA 3′ untranslated regions with noncoding RNA functions in Arabidopsis
Source: HighWire-hosted journal article supplement (doi:10.1101/gr.218669.116), 2017-05-18
Supplement: Supplemental_Fig_S10.pdf [file Supplemental_Fig_S10.pdf]

# Supplemental Figure 10

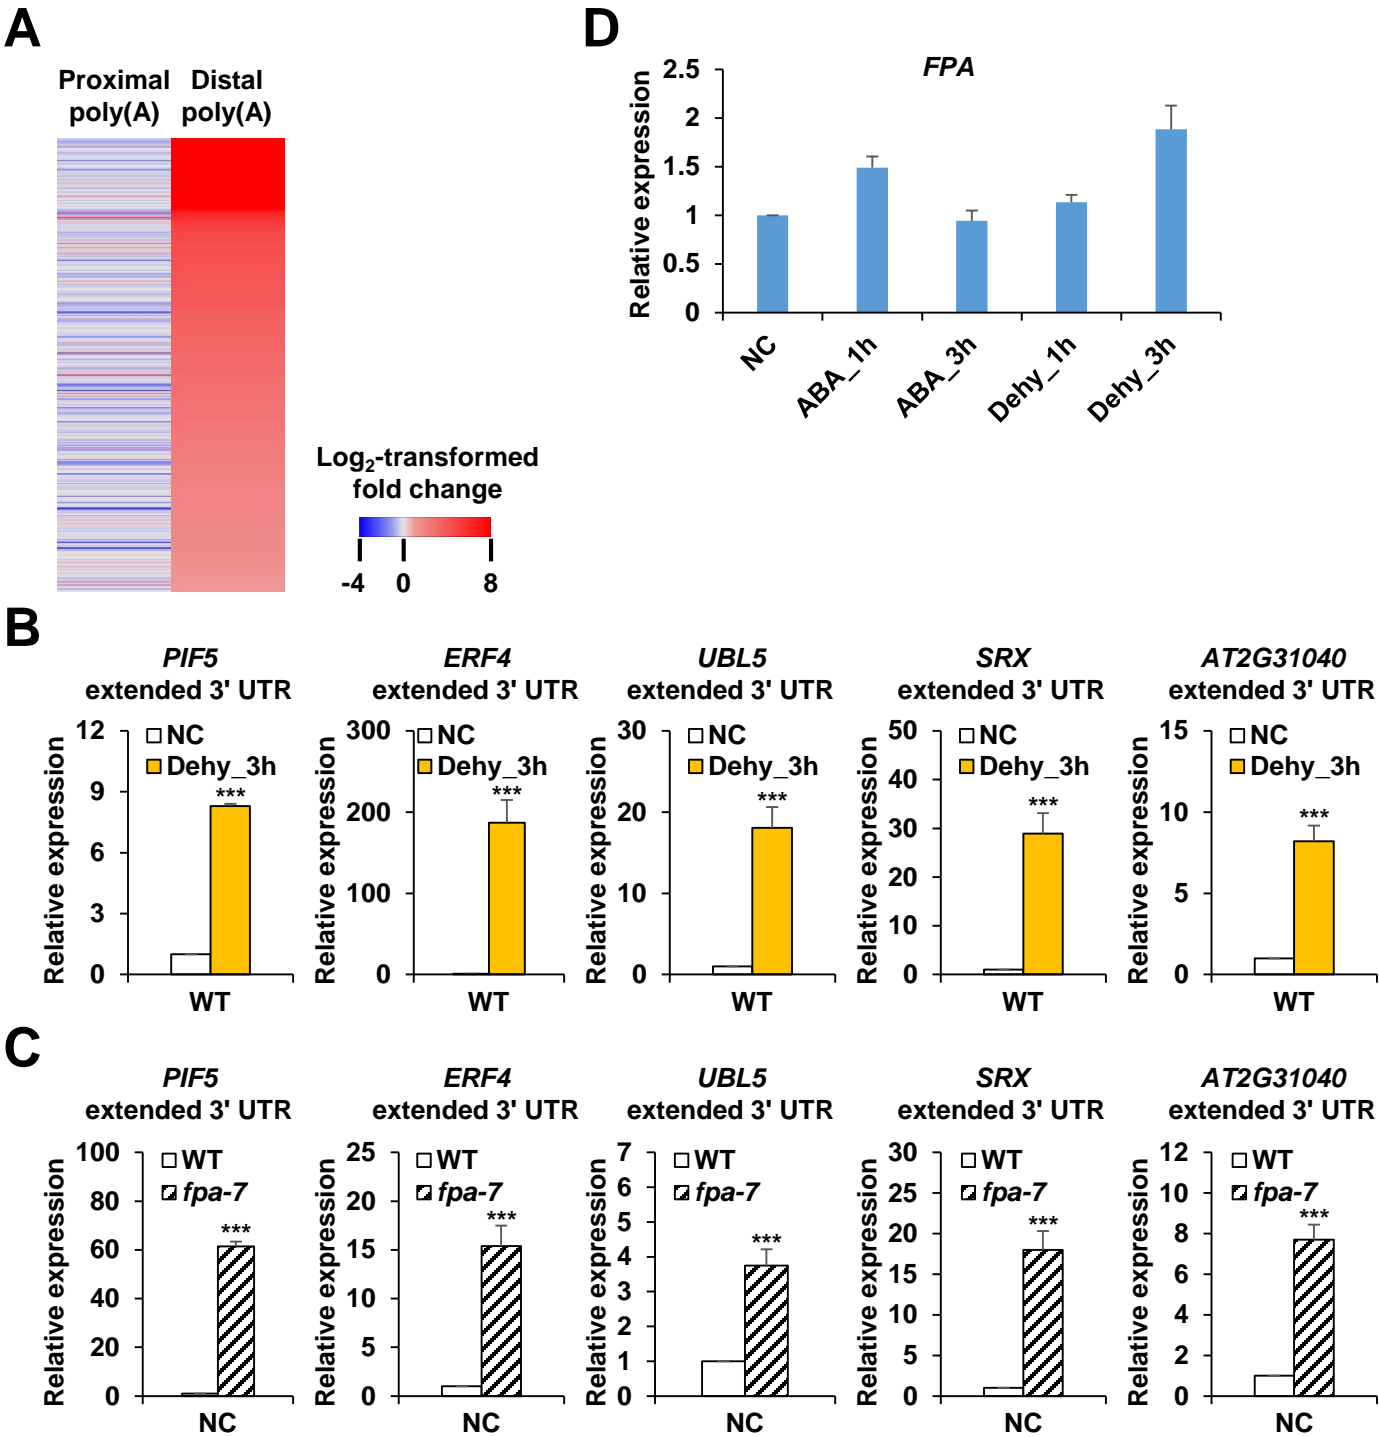

**Supplemental Figure 10. FPA partially regulates biogenesis of 3' UTR extensions.**

**(A)** Heatmap showing fold changes of DRS reads at proximal and distal poly(A) sites. A total of 420 transcripts with enhanced distal polyadenylation in *fpa* mutant compared to WT were used for this plot. Blue and red represent log<sub>2</sub>-transformed fold changes < 0 and > 0, respectively. **(B)** Real-time PCR analysis showing expression levels of extended 3' UTR of *PIF5*, *ERF4*, *UBL5*, *SRX* and *AT2G31040* in WT. The expression level of each gene in WT plants grown in normal condition (NC) was set to 1. **(C)** Real-time PCR analysis showing expression levels of extended 3' UTR in WT and *fpa-7* mutant. **(D)** Real-time PCR analysis of expression levels of *FPA*. The expression level in normal condition (NC) was set to 1. Transcript levels were normalized to *ACT2* expression. The expression level of each gene in WT plants grown in normal condition (NC) was set to 1. Data are shown as mean  $\pm$  s.d. (n = 3) of one representative result of three independent biological replicates. Asterisks indicate statistically significant differences compared with WT (\* P < 0.05, \*\* P < 0.01, \*\*\* P < 0.001; t test).
