# Supplementary material for: Dehydration stress extends mRNA 3′ untranslated regions with noncoding RNA functions in Arabidopsis
Source: HighWire-hosted journal article supplement (doi:10.1101/gr.218669.116), 2017-05-18
Supplement: Supplemental_Table_S1.xlsx [file Supplemental_Table_S1.xlsx]

## Sheet: Supplemental Table 1
Supplemental Table 1. Statistics of ssRNA-seq reads that could map to Arabidopsis genome.
Sample	Growth condition	Total reads	Mapped reads
NC_Rep1	Normal condition (NC)	94567102	70,598,764 (75%)
NC_Rep2	Normal condition (NC)	59688802	44,559,899 (75%)
NC_Rep3	Normal condition (NC)	98467006	74,357,926 (76%)
ABA_1h_Rep1	ABA treatment for 1 h (ABA_1h)	71706534	58,208,508 (81%)
ABA_1h_Rep2	ABA treatment for 1 h (ABA_1h)	50596541	41,542,557 (82%)
ABA_1h_Rep3	ABA treatment for 1 h (ABA_1h)	89234800	72,302,667 (81%)
ABA_3h_Rep1	ABA treatment for 3 h (ABA_3h)	72769220	58,995,031 (81%)
ABA_3h_Rep2	ABA treatment for 3 h (ABA_3h)	86315402	70,134,222 (81%)
ABA_3h_Rep3	ABA treatment for 3 h (ABA_3h)	106690309	85,318,398 (80%)
Dehy_1h_Rep1	dehydration stress for 1 h (Dehy_1h)	83278981	63,323,650 (76%)
Dehy_1h_Rep2	dehydration stress for 1 h (Dehy_1h)	61654437	46,138,036 (75%)
Dehy_1h_Rep3	dehydration stress for 1 h (Dehy_1h)	104440862	78,826,918 (75%)
Dehy_3h_Rep1	dehydration stress for 3 h (Dehy_3h)	72237780	54,094,887 (75%)
Dehy_3h_Rep2	dehydration stress for 3 h (Dehy_3h)	89628367	66,226,744 (74%)
Dehy_3h_Rep3	dehydration stress for 3 h (Dehy_3h)	92404059	70,165,858 (76%)
