# Supplementary material for: Dehydration stress extends mRNA 3′ untranslated regions with noncoding RNA functions in Arabidopsis
Source: HighWire-hosted journal article supplement (doi:10.1101/gr.218669.116), 2017-05-18
Supplement: Supplemental_Table_S2.xlsx [file Supplemental_Table_S2.xlsx]

## Sheet: Supplemental Table 2
Supplemental Table 2. Tabulated data of gene expression levels detected by ssRNA-seq.
Column A-E: gene ID, locus, category, symbol and annotation of gene;
Column F-J: FPKMs of genes in NC, ABA_1h, ABA_3h, Dehy_1h, and Dehy_3h;
Column K-N: log2-transformed fold changes of gene expression levels in ABA_1h, ABA_3h, Dehy_1h, and Dehy_3h relative to NC;
Column O-R: code for differentially expressed (DE) genes in ABA_1h, ABA_3h, Dehy_1h, and Dehy_3h relative to NC, "U" for up-regulated, "D" for down-regulated, "_" for not differentially expressed;
Gene ID	Gene locus	Category	Symbol	Annotation	NC	ABA_1h	ABA_3h	Dehy_1h	Dehy_3h	logFC(ABA_1h/NC)	logFC(ABA_3h/NC)	logFC(Dehy_1h/NC)	logFC(Dehy_3h/NC)	DE.ABA_1h	DE.ABA_3h	DE.Dehy_1h	DE.Dehy_3h
AT1G01010	Chr1:3631-5899[+]	protein_coding_gene	ANAC001, NAC001	NAC domain containing protein 1	7.63796	9.71625	6.03414	17.5208	58.7454	0.347212	-0.340039	1.19781	2.94321	_	_	U	U
AT1G01020	Chr1:5928-8737[-]	protein_coding_gene	ARV1	Arv1-like protein	13.2859	10.7865	8.91619	11.5669	12.8494	-0.300669	-0.575396	-0.199894	-0.0481949	_	_	_	_
AT1G01030	Chr1:11649-13714[-]	protein_coding_gene	NGA3	AP2/B3-like transcriptional factor family protein	3.78987	3.45561	1.61572	4.81738	12.1444	-0.133208	-1.22997	0.3461	1.68007	_	D	_	U
AT1G01040	Chr1:23146-31227[+]	protein_coding_gene	DCL1	dicer-like 1	6.25388	9.58845	9.45383	11.418	9.79806	0.616545	0.596147	0.868485	0.647744	_	_	_	_
AT1G01050	Chr1:31170-33153[-]	protein_coding_gene	AtPPa1, PPa1	pyrophosphorylase 1	74.7517	82.0082	83.6138	70.2101	90.5829	0.133662	0.161635	-0.0904278	0.277132	_	_	_	_
AT1G01060	Chr1:33379-37871[-]	protein_coding_gene	LHY	Homeodomain-like superfamily protein	18.4037	12.0837	3.52545	11.0714	5.49176	-0.606933	-2.38411	-0.733158	-1.74465	_	D	_	D
AT1G01070	Chr1:38752-40944[-]	protein_coding_gene	#N/A	nodulin MtN21 /EamA-like transporter family protein	9.15337	8.11031	14.2174	6.55559	5.64826	-0.174546	0.635282	-0.481577	-0.696496	_	_	_	_
AT1G01080	Chr1:45296-47019[-]	protein_coding_gene	#N/A	RNA-binding (RRM/RBD/RNP motifs) family protein	85.5187	71.1757	58.2866	61.5966	52.2236	-0.264855	-0.553076	-0.473389	-0.711538	_	_	_	_
AT1G01090	Chr1:47485-49286[-]	protein_coding_gene	PDH-E1 ALPHA	pyruvate dehydrogenase E1 alpha	151.883	161.74	173.295	149.836	133.87	0.0907161	0.19027	-0.0195761	-0.182128	_	_	_	_
AT1G01100	Chr1:50075-51199[-]	protein_coding_gene	#N/A	60S acidic ribosomal protein family	754.698	704.267	587.876	509.719	698.187	-0.099777	-0.360388	-0.566197	-0.112286	_	_	_	_
AT1G01110	Chr1:52239-54692[+]	protein_coding_gene	IQD18	IQ-domain 18	1.96364	1.36107	0.668094	2.41634	1.61223	-0.528786	-1.55539	0.299292	-0.284471	_	D	_	_
AT1G01120	Chr1:57269-59167[-]	protein_coding_gene	KCS1	3-ketoacyl-CoA synthase 1	47.3618	142.04	159.279	90.3725	185.866	1.5845	1.74976	0.93216	1.97247	U	U	_	U
AT1G01130	Chr1:61905-63811[-]	protein_coding_gene	#N/A	CONTAINS InterPro DOMAIN/s: CBL-interacting protein kinase (InterPro:IPR020660), Calcium/calmodulin-dependent protein kinase-like (InterPro:IPR020636); BEST Arabidopsis thaliana protein match is: unknown protein (TAIR:AT5G47170.1); Has 176 Blast hits to 176 proteins in 20 species: Archae - 0; Bacteria - 0; Metazoa - 0; Fungi - 0; Plants - 176; Viruses - 0; Other Eukaryotes - 0 (source: NCBI BLink…	3.79762	4.34831	4.70049	9.97161	9.96654	0.195359	0.307715	1.39273	1.39199	_	_	U	U
AT1G01140	Chr1:64166-67625[-]	protein_coding_gene	CIPK9, PKS6	CBL-interacting protein kinase 9	51.0589	39.4635	48.8227	89.3929	49.923	-0.371643	-0.0646104	0.807998	-0.0324578	_	_	_	_
AT1G01150	Chr1:70115-72138[-]	protein_coding_gene	#N/A	Homeodomain-like protein with RING/FYVE/PHD-type zinc finger domain	0.0759529	0.0900867	0.0845871	0.200453	0.152605	0.246179	0.155313	1.39997	1.00653	_	_	U	U
AT1G01160	Chr1:72339-74096[+]	protein_coding_gene	GIF2	GRF1-interacting factor 2	41.5292	32.1362	30.9336	33.9247	30.3946	-0.369927	-0.424951	-0.29179	-0.450311	_	_	_	_
AT1G01170	Chr1:73931-74737[-]	protein_coding_gene	#N/A	Protein of unknown function (DUF1138)	194.269	142.232	139.348	132.238	153.612	-0.44981	-0.479363	-0.554919	-0.338765	_	_	_	_
AT1G01180	Chr1:75583-76758[+]	protein_coding_gene	#N/A	S-adenosyl-L-methionine-dependent methyltransferases superfamily protein	15.1899	4.34816	5.28381	5.36069	6.29911	-1.80463	-1.52346	-1.50262	-1.26989	D	D	D	D
AT1G01190	Chr1:83045-84864[-]	protein_coding_gene	CYP78A8	cytochrome P450, family 78, subfamily A, polypeptide 8	2.94108	2.19478	2.5203	2.00286	2.41268	-0.422268	-0.22275	-0.554282	-0.285708	_	_	_	_
AT1G01200	Chr1:86515-88213[-]	protein_coding_gene	ATRABA3, ATRAB-A3, RABA3	RAB GTPase homolog A3	1.47547	1.38728	0.750202	1.55221	2.31897	-0.088915	-0.975814	0.0731487	0.652306	_	_	_	_
AT1G01210	Chr1:88898-89745[+]	protein_coding_gene	#N/A	DNA-directed RNA polymerase, subunit M, archaeal	38.6609	33.1942	22.1301	25.9584	33.8562	-0.219944	-0.804865	-0.574674	-0.191455	_	_	_	_
AT1G01220	Chr1:91376-95651[+]	protein_coding_gene	FKGP, AtFKGP	L-fucokinase/GDP-L-fucose pyrophosphorylase	8.31549	10.9666	12.7466	9.66868	7.68472	0.399243	0.616239	0.217517	-0.113808	_	_	_	_
AT1G01225	Chr1:95987-97407[+]	protein_coding_gene	#N/A	NC domain-containing protein-related	3.51688	3.87625	4.55271	2.78121	3.23128	0.140365	0.372429	-0.338582	-0.12219	_	_	_	_
AT1G01230	Chr1:97456-99240[+]	protein_coding_gene	#N/A	ORMDL family protein	48.0689	51.5807	61.8257	45.9146	60.8816	0.101728	0.363103	-0.0661508	0.340902	_	_	_	_
AT1G01240	Chr1:99894-101834[+]	protein_coding_gene	#N/A	unknown protein; BEST Arabidopsis thaliana protein match is: unknown protein (TAIR:AT2G46550.1); Has 35333 Blast hits to 34131 proteins in 2444 species: Archae - 798; Bacteria - 22429; Metazoa - 974; Fungi - 991; Plants - 531; Viruses - 0; Other Eukaryotes - 9610 (source: NCBI BLink).	12.7006	16.6311	38.3464	7.28627	19.3362	0.388987	1.59419	-0.801643	0.606407	_	U	_	_
AT1G01250	Chr1:104491-105330[-]	protein_coding_gene	#N/A	Integrase-type DNA-binding superfamily protein	1.46795	3.95284	9.72624	0.798846	4.11477	1.42908	2.72807	-0.877805	1.487	U	U	_	U
AT1G01260	Chr1:108946-111609[+]	protein_coding_gene	#N/A	basic helix-loop-helix (bHLH) DNA-binding superfamily protein	6.60952	8.40798	7.08937	15.9721	9.20641	0.347213	0.101112	1.27294	0.478093	_	_	U	_
AT1G01290	Chr1:114286-116108[+]	protein_coding_gene	CNX3	cofactor of nitrate reductase and xanthine dehydrogenase 3	18.1655	18.9962	19.9138	17.7609	14.6852	0.0645097	0.132567	-0.0324964	-0.306838	_	_	_	_
AT1G01300	Chr1:116943-118764[+]	protein_coding_gene	#N/A	Eukaryotic aspartyl protease family protein	44.1172	56.5109	54.6976	68.1394	53.4805	0.357188	0.310136	0.627148	0.277672	_	_	_	_
AT1G01320	Chr1:121067-130577[-]	protein_coding_gene	#N/A	Tetratricopeptide repeat (TPR)-like superfamily protein	75.6192	67.5154	82.5129	68.0206	63.8834	-0.163536	0.125867	-0.152781	-0.243311	_	_	_	_
AT1G01340	Chr1:132328-135831[-]	protein_coding_gene	CNGC10	cyclic nucleotide gated channel 10	3.76163	3.51622	3.66738	7.82867	5.94097	-0.0973323	-0.0366081	1.05741	0.659339	_	_	U	_
AT1G01350	Chr1:136124-138162[+]	protein_coding_gene	#N/A	Zinc finger (CCCH-type/C3HC4-type RING finger) family protein	20.5121	18.4689	18.739	23.313	21.6509	-0.151377	-0.130431	0.184659	0.0779518	_	_	_	_
AT1G01355	Chr1:138513-139568[+]	protein_coding_gene	#N/A	Putative endonuclease or glycosyl hydrolase	0.0579775	0.123181	0.0873047	0.147777	0.194053	1.08708	0.590483	1.34971	1.74271	_	_	U	U
AT1G01360	Chr1:141971-143183[+]	protein_coding_gene	RCAR1, PYL9	regulatory component of ABA receptor 1	9.00331	9.8973	7.17893	13.0829	51.6282	0.136579	-0.326686	0.539154	2.51963	_	_	_	U
AT1G01370	Chr1:143564-145684[+]	protein_coding_gene	HTR12, CENH3	Histone superfamily protein	6.02905	5.82114	6.39846	5.22042	6.6462	-0.0506289	0.0857939	-0.207764	0.140599	_	_	_	_
AT1G01380	Chr1:147153-147942[+]	protein_coding_gene	ETC1	Homeodomain-like superfamily protein	2.40951	2.78229	1.74646	2.0988	6.44194	0.207532	-0.464304	-0.199174	1.41875	_	_	_	U
AT1G01390	Chr1:148120-149806[-]	protein_coding_gene	#N/A	UDP-Glycosyltransferase superfamily protein	1.3809	0.863023	0.567475	1.39917	2.03783	-0.678132	-1.28297	0.0189623	0.561421	_	D	_	_
AT1G01420	Chr1:154492-156011[-]	protein_coding_gene	UGT72B3	UDP-glucosyl transferase 72B3	6.38972	13.9264	11.8124	13.1718	11.9295	1.124	0.886476	1.04363	0.900708	U	_	U	_
AT1G01430	Chr1:156801-158655[-]	protein_coding_gene	TBL25	TRICHOME BIREFRINGENCE-LIKE 25	105.265	74.8827	77.1303	36.6477	32.0555	-0.491321	-0.448656	-1.52223	-1.71538	_	_	D	D
AT1G01440	Chr1:159856-162572[-]	protein_coding_gene	#N/A	Protein of unknown function (DUF3133)	12.09	8.93593	10.4078	10.1978	9.03451	-0.436124	-0.216149	-0.245556	-0.420296	_	_	_	_
AT1G01448	Chr1:163419-166239[+]	other_RNA	#N/A	other RNA	10.4147	8.54577	6.93158	11.7332	8.44213	-0.285339	-0.587364	0.171975	-0.302942	_	_	_	_
AT1G01453	Chr1:166589-167842[-]	protein_coding_gene	#N/A	unknown protein; FUNCTIONS IN: molecular_function unknown; INVOLVED IN: biological_process unknown; LOCATED IN: cellular_component unknown; BEST Arabidopsis thaliana protein match is: unknown protein (TAIR:AT4G01110.1); Has 30201 Blast hits to 17322 proteins in 780 species: Archae - 12; Bacteria - 1396; Metazoa - 17338; Fungi - 3422; Plants - 5037; Viruses - 0; Other Eukaryotes - 2996 (source: NC…	0.652394	0.695116	1.04463	0.293625	0.363908	0.0915089	0.679168	-1.15174	-0.842152	_	_	D	_
AT1G01470	Chr1:172146-172948[-]	protein_coding_gene	LEA14, LSR3	Late embryogenesis abundant protein	59.9482	252.764	872.027	382.007	1377.16	2.076	3.86258	2.67181	4.52184	U	U	U	U
AT1G01480	Chr1:175782-178400[+]	protein_coding_gene	ACS2, AT-ACC2	1-amino-cyclopropane-1-carboxylate synthase 2	0.452482	2.15892	5.34472	3.23523	11.5607	2.25435	3.56215	2.83791	4.67519	U	U	U	U
AT1G01490	Chr1:180059-182358[-]	protein_coding_gene	#N/A	Heavy metal transport/detoxification superfamily protein	98.1474	47.3754	74.0231	33.2494	37.9813	-1.05081	-0.406974	-1.56162	-1.36966	D	_	D	D
AT1G01500	Chr1:185133-186923[+]	protein_coding_gene	#N/A	Erythronate-4-phosphate dehydrogenase family protein	20.9503	22.1172	30.1954	21.4592	29.4093	0.0781978	0.527358	0.0346254	0.489301	_	_	_	_
AT1G01510	Chr1:187211-190056[+]	protein_coding_gene	AN	NAD(P)-binding Rossmann-fold superfamily protein	21.3229	21.8615	22.0928	20.1825	17.6143	0.0359887	0.0511726	-0.0792987	-0.275656	_	_	_	_
AT1G01520	Chr1:190596-192139[+]	protein_coding_gene	#N/A	Homeodomain-like superfamily protein	2.28065	30.3533	11.134	27.0043	27.7105	3.73433	2.28745	3.56567	3.60291	U	U	U	U
AT1G01530	Chr1:192640-193670[-]	protein_coding_gene	AGL28	AGAMOUS-like 28	0.133484	0.0692675	0.0195475	0.0916106	0.109366	-0.946316	-2.77098	-0.543031	-0.287479	_	D	_	_
AT1G01540	Chr1:195780-198684[+]	protein_coding_gene	#N/A	Protein kinase superfamily protein	46.3583	39.2904	39.8959	35.7969	34.526	-0.238651	-0.216587	-0.372993	-0.425144	_	_	_	_
AT1G01550	Chr1:199639-201775[+]	protein_coding_gene	BPS1	Protein of unknown function (DUF793)	165.643	173.007	176.315	213.184	207.133	0.0627532	0.090078	0.364022	0.32248	_	_	_	_
AT1G01560	Chr1:202136-204335[+]	protein_coding_gene	ATMPK11, MPK11	MAP kinase 11	1.46394	3.72208	6.42851	7.95515	10.2942	1.34625	2.13462	2.44202	2.81389	U	U	U	U
AT1G01570	Chr1:205176-207435[+]	protein_coding_gene	#N/A	Protein of unknown function (DUF604)	1.11089	1.66046	3.24065	1.41305	3.6943	0.579863	1.54456	0.347094	1.73358	_	U	_	U
AT1G01580	Chr1:209395-213041[+]	protein_coding_gene	FRO2, FRD1, ATFRO2	ferric reduction oxidase 2	1.71438	2.31546	0.896703	0.926865	1.98696	0.43361	-0.934977	-0.887249	0.212875	_	_	_	_
AT1G01600	Chr1:218994-221286[+]	protein_coding_gene	CYP86A4	cytochrome P450, family 86, subfamily A, polypeptide 4	4.59047	5.84733	8.23739	3.66279	12.4886	0.349135	0.843544	-0.325698	1.4439	_	_	_	U
AT1G01610	Chr1:221691-224340[-]	protein_coding_gene	ATGPAT4, GPAT4	glycerol-3-phosphate acyltransferase 4	42.3337	53.2401	87.3208	41.2925	114.048	0.330707	1.04452	-0.0359268	1.42976	_	U	_	U
AT1G01620	Chr1:225665-227302[-]	protein_coding_gene	PIP1C, TMP-B, PIP1;3	plasma membrane intrinsic protein 1C	498.57	362.581	346.686	293.439	759.255	-0.459493	-0.524166	-0.764735	0.606788	_	_	_	_
AT1G01630	Chr1:229013-230917[+]	protein_coding_gene	#N/A	Sec14p-like phosphatidylinositol transfer family protein	54.8239	57.9737	73.3854	47.3639	70.2982	0.0805936	0.420688	-0.211017	0.358683	_	_	_	_
AT1G01640	Chr1:230994-232508[-]	protein_coding_gene	#N/A	BTB/POZ domain-containing protein	8.62833	7.44381	5.13706	8.13384	9.57365	-0.21304	-0.748137	-0.0851446	0.149988	_	_	_	_
AT1G01650	Chr1:232841-237817[-]	protein_coding_gene	SPPL4, ATSPPL4	SIGNAL PEPTIDE PEPTIDASE-LIKE 4	20.0558	27.6639	47.4004	32.8117	38.7685	0.463985	1.24088	0.710191	0.950865	_	U	_	_
AT1G01660	Chr1:240057-242608[-]	protein_coding_gene	#N/A	RING/U-box superfamily protein	0.620162	0.917668	0.707035	0.608387	0.678041	0.56532	0.189134	-0.0276554	0.128725	_	_	_	_
AT1G01670	Chr1:242843-245988[-]	protein_coding_gene	#N/A	RING/U-box superfamily protein	0.9358	0.938437	0.791244	0.936359	1.06551	0.00405962	-0.242075	0.000861527	0.18727	_	_	_	_
AT1G01680	Chr1:246411-248367[-]	protein_coding_gene	ATPUB54, PUB54	plant U-box 54	0.836083	1.01511	2.25273	0.409481	0.750176	0.279915	1.42995	-1.02983	-0.156415	_	U	D	_
AT1G01690	Chr1:249141-252462[+]	protein_coding_gene	ATPRD3, PRD3	putative recombination initiation defects 3	2.99562	3.98459	3.79304	3.31858	3.49362	0.411575	0.340499	0.147711	0.221867	_	_	_	_
AT1G01695	Chr1:252947-254495[+]	protein_coding_gene	#N/A	Phosphatidylinositol N-acetyglucosaminlytransferase subunit P-related	0.0658812	0.27621	0.19324	0.27289	0.559442	2.06766	1.55231	2.05021	3.08586	U	U	U	U
AT1G01700	Chr1:259495-261474[-]	protein_coding_gene	ATROPGEF2, ROPGEF2	RHO guanyl-nucleotide exchange factor 2	0.668075	0.848452	0.460691	0.964754	0.939212	0.344818	-0.536201	0.530144	0.491435	_	_	_	_
AT1G01710	Chr1:262828-267771[+]	protein_coding_gene	#N/A	Acyl-CoA thioesterase family protein	14.2213	14.191	17.1504	15.3545	13.6112	-0.00307709	0.270189	0.110608	-0.063259	_	_	_	_
AT1G01720	Chr1:268330-269819[+]	protein_coding_gene	ATAF1, ANAC002	NAC (No Apical Meristem) domain transcriptional regulator superfamily protein	48.8512	107.056	67.285	136.667	426.837	1.1319	0.461891	1.4842	3.12722	U	_	U	U
AT1G01725	Chr1:269792-270775[-]	protein_coding_gene	#N/A	unknown protein; FUNCTIONS IN: molecular_function unknown; INVOLVED IN: biological_process unknown; LOCATED IN: endomembrane system; EXPRESSED IN: 23 plant structures; EXPRESSED DURING: 14 growth stages; BEST Arabidopsis thaliana protein match is: unknown protein (TAIR:AT4G00530.1); Has 20 Blast hits to 20 proteins in 7 species: Archae - 0; Bacteria - 0; Metazoa - 0; Fungi - 0; Plants - 20; Virus…	25.1688	17.9325	14.2325	18.0078	24.5685	-0.48906	-0.822447	-0.483014	-0.0348266	_	_	_	_
AT1G01730	Chr1:270956-272061[+]	protein_coding_gene	#N/A	unknown protein; FUNCTIONS IN: molecular_function unknown; INVOLVED IN: biological_process unknown; LOCATED IN: chloroplast; EXPRESSED IN: 23 plant structures; EXPRESSED DURING: 13 growth stages; Has 42 Blast hits to 42 proteins in 17 species: Archae - 0; Bacteria - 2; Metazoa - 5; Fungi - 1; Plants - 34; Viruses - 0; Other Eukaryotes - 0 (source: NCBI BLink).	27.524	27.9303	23.2151	33.7162	46.8116	0.0211409	-0.245627	0.292752	0.766176	_	_	_	_
AT1G01740	Chr1:272111-274569[-]	protein_coding_gene	#N/A	Protein kinase protein with tetratricopeptide repeat domain	3.65709	3.62469	2.73542	3.81348	3.14939	-0.0128385	-0.418932	0.0604118	-0.215623	_	_	_	_
AT1G01750	Chr1:275366-276310[+]	protein_coding_gene	ADF11	actin depolymerizing factor 11	10.1333	7.98179	7.03067	5.31305	6.42146	-0.344319	-0.527369	-0.931491	-0.65813	_	_	_	_
AT1G01760	Chr1:276266-278448[-]	protein_coding_gene	#N/A	adenosine deaminases;RNA binding;RNA binding;adenosine deaminases	3.75903	3.06427	2.8071	3.13663	2.50909	-0.294816	-0.421279	-0.261144	-0.583194	_	_	_	_
AT1G01770	Chr1:278615-282891[+]	protein_coding_gene	#N/A	unknown protein; CONTAINS InterPro DOMAIN/s: Protein of unknown function DUF1446 (InterPro:IPR010839); Has 1597 Blast hits to 1509 proteins in 306 species: Archae - 4; Bacteria - 843; Metazoa - 22; Fungi - 131; Plants - 31; Viruses - 0; Other Eukaryotes - 566 (source: NCBI BLink).	15.7393	12.4281	12.5807	15.3521	9.36384	-0.340765	-0.323159	-0.0359353	-0.749199	_	_	_	_
AT1G01780	Chr1:282761-284245[+]	protein_coding_gene	#N/A	GATA type zinc finger transcription factor family protein	17.3801	15.3126	16.0333	15.3574	12.1178	-0.182717	-0.116365	-0.178502	-0.520308	_	_	_	_
AT1G01790	Chr1:284610-291094[+]	protein_coding_gene	KEA1, ATKEA1	K+ efflux antiporter 1	15.133	13.5768	11.9095	17.1299	14.3268	-0.156554	-0.345585	0.178819	-0.0789816	_	_	_	_
AT1G01800	Chr1:293342-295040[+]	protein_coding_gene	#N/A	NAD(P)-binding Rossmann-fold superfamily protein	61.9137	57.454	56.3354	50.7983	63.2301	-0.107851	-0.136217	-0.285478	0.0303528	_	_	_	_
AT1G01810	Chr1:295221-295859[+]	protein_coding_gene	#N/A	unknown protein; Has 12 Blast hits to 12 proteins in 5 species: Archae - 0; Bacteria - 0; Metazoa - 5; Fungi - 0; Plants - 7; Viruses - 0; Other Eukaryotes - 0 (source: NCBI BLink).	1.32652	1.92583	1.48852	0.953582	1.21841	0.537831	0.166231	-0.476213	-0.122646	_	_	_	_
AT1G01820	Chr1:296001-298120[-]	protein_coding_gene	PEX11C	peroxin 11c	69.0314	64.079	56.8127	66.991	77.8517	-0.107401	-0.281039	-0.0432854	0.173476	_	_	_	_
AT1G01830	Chr1:298535-302315[-]	protein_coding_gene	#N/A	ARM repeat superfamily protein	7.99779	13.6876	22.2193	8.3903	12.5815	0.775195	1.47414	0.0691209	0.65363	_	U	_	_
AT1G01840	Chr1:303537-304358[+]	protein_coding_gene	#N/A	unknown protein; Has 23 Blast hits to 23 proteins in 9 species: Archae - 0; Bacteria - 0; Metazoa - 0; Fungi - 0; Plants - 23; Viruses - 0; Other Eukaryotes - 0 (source: NCBI BLink).	2.34488	1.45476	1.43663	0.51729	1.62414	-0.688729	-0.706822	-2.18045	-0.529835	_	_	D	_
AT1G01860	Chr1:304133-306287[-]	protein_coding_gene	PFC1	Ribosomal RNA adenine dimethylase family protein	10.1447	9.08602	9.68328	9.41994	7.95199	-0.159006	-0.0671584	-0.106936	-0.351338	_	_	_	_
AT1G01880	Chr1:306480-309109[-]	protein_coding_gene	#N/A	5'-3' exonuclease family protein	1.4466	1.34611	1.511	1.28248	1.28444	-0.103869	0.0628372	-0.173728	-0.171525	_	_	_	_
AT1G01900	Chr1:310316-313130[+]	protein_coding_gene	ATSBT1.1, SBTI1.1	subtilase family protein	3.75105	5.46673	10.9745	3.63186	6.57217	0.543382	1.54879	-0.0465858	0.809074	_	U	_	_
AT1G01910	Chr1:313101-315902[-]	protein_coding_gene	#N/A	P-loop containing nucleoside triphosphate hydrolases superfamily protein	42.6294	47.5109	50.2229	43.155	44.3633	0.15641	0.236497	0.017679	0.0575179	_	_	_	_
AT1G01920	Chr1:316128-319650[+]	protein_coding_gene	#N/A	SET domain-containing protein	13.5001	13.4739	12.26	14.626	12.6454	-0.00280259	-0.139011	0.115565	-0.0943573	_	_	_	_
AT1G01930	Chr1:319836-322860[-]	protein_coding_gene	#N/A	zinc finger protein-related	9.86102	8.34549	8.40872	9.97957	9.74848	-0.24074	-0.22985	0.0172408	-0.0165596	_	_	_	_
AT1G01940	Chr1:323027-324917[+]	protein_coding_gene	#N/A	Cyclophilin-like peptidyl-prolyl cis-trans isomerase family protein	38.0882	30.0898	26.6695	27.6169	29.4667	-0.340069	-0.514153	-0.463793	-0.370258	_	_	_	_
AT1G01950	Chr1:325379-330619[+]	protein_coding_gene	ARK2	armadillo repeat kinesin 2	9.50509	9.90592	6.42969	14.7329	9.26871	0.0595906	-0.56395	0.632269	-0.0363317	_	_	_	_
AT1G01960	Chr1:330588-337582[-]	protein_coding_gene	EDA10	SEC7-like guanine nucleotide exchange family protein	26.5836	32.0622	32.1395	28.3355	21.5481	0.270337	0.273811	0.0920741	-0.302976	_	_	_	_
AT1G01970	Chr1:338291-340077[+]	protein_coding_gene	#N/A	Tetratricopeptide repeat (TPR)-like superfamily protein	18.4036	17.5601	18.0598	17.2326	17.5868	-0.0676869	-0.0272061	-0.0948476	-0.065495	_	_	_	_
AT1G01990	Chr1:343166-344341[-]	protein_coding_gene	#N/A	unknown protein; Has 32 Blast hits to 32 proteins in 6 species: Archae - 0; Bacteria - 0; Metazoa - 0; Fungi - 0; Plants - 32; Viruses - 0; Other Eukaryotes - 0 (source: NCBI BLink).	28.8682	21.8864	16.0879	22.7068	22.7211	-0.399446	-0.843505	-0.346357	-0.345448	_	_	_	_
AT1G02000	Chr1:345812-347592[+]	protein_coding_gene	GAE2	UDP-D-glucuronate 4-epimerase 2	9.83579	9.56968	12.0446	7.57857	6.90415	-0.0395702	0.292273	-0.376115	-0.510577	_	_	_	_
AT1G02010	Chr1:347891-352480[+]	protein_coding_gene	SEC1A	secretory 1A	2.82193	3.75256	3.47612	4.77575	3.95226	0.411192	0.300795	0.759043	0.485994	_	_	_	_
AT1G02020	Chr1:352637-354969[-]	protein_coding_gene	#N/A	nitroreductase family protein	8.63491	9.04013	9.61947	8.47908	6.23352	0.0661623	0.155776	-0.0262734	-0.470133	_	_	_	_
AT1G02030	Chr1:355321-357258[-]	protein_coding_gene	#N/A	C2H2-like zinc finger protein	0.160708	0.380772	0.290811	0.151153	0.319978	1.24443	0.8556	-0.0884265	0.993486	U	_	_	_
AT1G02040	Chr1:358104-359078[-]	protein_coding_gene	#N/A	C2H2-type zinc finger family protein	0.0130949	0.0137769	0.0289574	0.0652079	0.11866	0.0731918	1.14432	2.31516	3.17878	_	_	U	U
AT1G02050	Chr1:359117-360518[-]	protein_coding_gene	LAP6	Chalcone and stilbene synthase family protein	5.27311	6.08212	4.90271	6.31059	4.62807	0.20592	-0.105074	0.25912	-0.188243	_	_	_	_
AT1G02060	Chr1:360918-363094[-]	protein_coding_gene	#N/A	Tetratricopeptide repeat (TPR)-like superfamily protein	5.35487	5.48649	4.64767	5.8024	4.06942	0.0350319	-0.204344	0.115798	-0.396028	_	_	_	_
AT1G02065	Chr1:365209-367340[+]	protein_coding_gene	SPL8	squamosa promoter binding protein-like 8	1.48885	1.50169	1.40204	1.75128	1.50797	0.0123885	-0.0866703	0.23421	0.0184092	_	_	_	_
AT1G02070	Chr1:370257-370967[-]	protein_coding_gene	#N/A	unknown protein; BEST Arabidopsis thaliana protein match is: unknown protein (TAIR:AT3G60520.1); Has 98 Blast hits to 98 proteins in 13 species: Archae - 0; Bacteria - 0; Metazoa - 0; Fungi - 0; Plants - 98; Viruses - 0; Other Eukaryotes - 0 (source: NCBI BLink).	0.927696	0.483886	0.847269	0.511809	0.465202	-0.938971	-0.130831	-0.858034	-0.995779	_	_	_	_
AT1G02074	Chr1:372064-372210[+]	protein_coding_gene	#N/A	unknown protein; Has 30201 Blast hits to 17322 proteins in 780 species: Archae - 12; Bacteria - 1396; Metazoa - 17338; Fungi - 3422; Plants - 5037; Viruses - 0; Other Eukaryotes - 2996 (source: NCBI BLink).	5.75737	3.02197	6.57514	0	7.07604	-0.929918	0.191611	-19.1351	0.297532	_	_	_	_
AT1G02080	Chr1:373335-386847[+]	protein_coding_gene	#N/A	transcription regulators	20.8239	28.8218	31.7188	30.3381	22.9314	0.46892	0.607098	0.54289	0.139084	_	_	_	_
AT1G02090	Chr1:387277-389647[-]	protein_coding_gene	FUS5, CSN7, COP15, ATCSN7	Proteasome component (PCI) domain protein	43.4527	37.7034	38.805	33.6728	39.4031	-0.204751	-0.163203	-0.367862	-0.141137	_	_	_	_
AT1G02100	Chr1:389812-392816[+]	protein_coding_gene	#N/A	Leucine carboxyl methyltransferase	26.8416	24.0091	23.2249	28.689	24.7895	-0.160889	-0.208798	0.096027	-0.114741	_	_	_	_
AT1G02110	Chr1:392831-395528[+]	protein_coding_gene	#N/A	Protein of unknown function (DUF630 and DUF632)	13.9027	12.9296	9.58955	13.955	11.529	-0.104687	-0.53583	0.00541703	-0.270097	_	_	_	_
AT1G02120	Chr1:395761-399897[+]	protein_coding_gene	VAD1	GRAM domain family protein	34.8756	34.9286	30.5976	44.2677	41.464	0.00219078	-0.188799	0.344036	0.249641	_	_	_	_
AT1G02130	Chr1:400035-401882[-]	protein_coding_gene	ATRAB1B, ARA5, ARA-5, ATRABD2A, RABD2A, RA-5	RAS 5	47.6943	46.0353	51.8621	42.0286	40.4769	-0.0510763	0.120864	-0.182445	-0.236718	_	_	_	_
AT1G02136	Chr1:402693-402961[-]	pseudogene	#N/A	pseudogene of phagocytosis and cell motility protein	0	0	0	0	0	0	0	0	0	_	_	_	_
AT1G02140	Chr1:403190-404456[-]	protein_coding_gene	MEE63, MAGO, HAP1	mago nashi family protein	248.203	197.694	172.596	175.25	228.426	-0.328251	-0.524121	-0.502106	-0.119794	_	_	_	_
AT1G02145	Chr1:404600-408619[+]	protein_coding_gene	ALG12, EBS4	homolog of asparagine-linked glycosylation 12	18.6156	17.8542	17.3973	19.8114	15.8903	-0.0602486	-0.0976486	0.0898187	-0.228366	_	_	_	_
AT1G02150	Chr1:408622-410611[+]	protein_coding_gene	#N/A	Tetratricopeptide repeat (TPR)-like superfamily protein	68.0316	59.1958	56.4374	54.9858	46.9643	-0.20071	-0.269553	-0.307146	-0.53464	_	_	_	_
AT1G02160	Chr1:410748-411597[+]	protein_coding_gene	#N/A	Cox19 family protein (CHCH motif)	48.5139	46.7746	43.6764	39.6062	43.274	-0.0526728	-0.151544	-0.292672	-0.164898	_	_	_	_
AT1G02170	Chr1:411779-413554[+]	protein_coding_gene	LOL3, ATMCPB1, MCP1B, ATMC1, MC1	metacaspase 1	23.3051	25.389	24.4042	29.0578	22.6038	0.123558	0.0664837	0.31828	-0.0440804	_	_	_	_
AT1G02180	Chr1:413522-414645[-]	protein_coding_gene	#N/A	ferredoxin-related	6.1573	5.61044	6.17822	4.44124	15.8625	-0.134184	0.00489337	-0.471334	1.36525	_	_	_	U
AT1G02190	Chr1:415079-418010[+]	protein_coding_gene	#N/A	Fatty acid hydroxylase superfamily	0.144092	0.115773	0.153603	0.294651	1.99046	-0.315667	0.09221	1.03197	3.78795	_	_	U	U
AT1G02205	Chr1:418748-422438[+]	protein_coding_gene	CER1	Fatty acid hydroxylase superfamily	17.1348	22.3687	189.268	12.3875	94.6869	0.384552	3.46543	-0.468044	2.46623	_	U	_	U
AT1G02220	Chr1:428814-430647[-]	protein_coding_gene	ANAC003, NAC003	NAC domain containing protein 3	8.83711	11.6609	14.8468	13.9636	18.2023	0.400032	0.748505	0.660024	1.04247	_	_	_	U
AT1G02230	Chr1:435174-436776[-]	protein_coding_gene	ANAC004, NAC004	NAC domain containing protein 4	0.854716	0.644766	0.34126	1.57743	1.59335	-0.406664	-1.32455	0.884051	0.898538	_	D	_	_
AT1G02250	Chr1:437951-439559[-]	protein_coding_gene	anac005, NAC005	NAC domain containing protein 5	0.0279521	0.0216409	0.00629041	0.24443	0.242068	-0.369046	-2.14996	3.12794	3.11393	_	_	U	U
AT1G02260	Chr1:440441-442877[-]	protein_coding_gene	#N/A	Divalent ion symporter	6.16743	8.0755	8.14399	7.99409	7.41154	0.388882	0.401066	0.374264	0.265104	_	_	_	_
AT1G02270	Chr1:443149-446235[-]	protein_coding_gene	#N/A	Calcium-binding endonuclease/exonuclease/phosphatase family	20.6088	20.4588	20.9714	36.5344	36.0211	-0.010539	0.0251627	0.825995	0.805581	_	_	_	_
AT1G02280	Chr1:448463-450426[-]	protein_coding_gene	TOC33, ATTOC33, PPI1	translocon at the outer envelope membrane of chloroplasts 33	128.811	112.318	82.0739	110.952	113.577	-0.197667	-0.65026	-0.21532	-0.181585	_	_	_	_
AT1G02290	Chr1:450527-452737[-]	protein_coding_gene	#N/A	unknown protein; BEST Arabidopsis thaliana protein match is: unknown protein (TAIR:AT3G45830.1); Has 134 Blast hits to 134 proteins in 37 species: Archae - 0; Bacteria - 0; Metazoa - 54; Fungi - 0; Plants - 78; Viruses - 0; Other Eukaryotes - 2 (source: NCBI BLink).	7.36239	7.48867	7.31889	6.74339	4.73243	0.0245353	-0.0085493	-0.1267	-0.637592	_	_	_	_
AT1G02300	Chr1:453288-455463[+]	protein_coding_gene	#N/A	Cysteine proteinases superfamily protein	10.0459	9.65688	18.5688	7.95249	8.83593	-0.0569777	0.886273	-0.337128	-0.185153	_	_	_	_
AT1G02305	Chr1:455688-458164[+]	protein_coding_gene	#N/A	Cysteine proteinases superfamily protein	56.4127	56.4798	88.9842	49.5723	53.6898	0.00171499	0.657529	-0.186486	-0.0713719	_	_	_	_
AT1G02310	Chr1:458133-460696[-]	protein_coding_gene	MAN1	Glycosyl hydrolase superfamily protein	0.337577	1.61047	8.19029	1.35158	1.49563	2.25416	4.60059	2.00133	2.14743	U	U	U	U
AT1G02330	Chr1:462075-463612[-]	protein_coding_gene	#N/A	CONTAINS InterPro DOMAIN/s: Hepatocellular carcinoma-associated antigen 59 (InterPro:IPR010756); Has 1239 Blast hits to 998 proteins in 204 species: Archae - 4; Bacteria - 71; Metazoa - 421; Fungi - 109; Plants - 87; Viruses - 5; Other Eukaryotes - 542 (source: NCBI BLink).	25.3368	24.3502	24.8435	31.6169	27.8308	-0.0573007	-0.0283659	0.319461	0.135448	_	_	_	_
AT1G02335	Chr1:463855-464924[-]	protein_coding_gene	GL22	germin-like protein subfamily 2 member 2 precursor	22.8601	21.0232	20.9885	19.1042	16.4284	-0.120849	-0.123233	-0.258942	-0.476639	_	_	_	_
AT1G02340	Chr1:465718-467844[-]	protein_coding_gene	HFR1, RSF1, FBI1, REP1	basic helix-loop-helix (bHLH) DNA-binding superfamily protein	19.7099	21.8397	16.3242	16.2172	21.169	0.148033	-0.271908	-0.281396	0.103033	_	_	_	_
AT1G02350	Chr1:469818-470693[+]	protein_coding_gene	#N/A	protoporphyrinogen oxidase-related	2.97604	1.16148	1.16506	1.40611	1.41422	-1.35742	-1.35298	-1.08168	-1.07338	D	D	D	D
AT1G02360	Chr1:471990-473160[-]	protein_coding_gene	#N/A	Chitinase family protein	14.6309	10.202	4.79289	14.3112	14.549	-0.520166	-1.61005	-0.0318738	-0.00809852	_	D	_	_
AT1G02370	Chr1:474500-476511[+]	protein_coding_gene	#N/A	Tetratricopeptide repeat (TPR)-like superfamily protein	8.6035	8.9004	7.40677	8.21155	6.65304	0.0489464	-0.216079	-0.067269	-0.370909	_	_	_	_
AT1G02380	Chr1:477000-478971[+]	protein_coding_gene	#N/A	unknown protein; BEST Arabidopsis thaliana protein match is: unknown protein (TAIR:AT4G01960.1); Has 66 Blast hits to 66 proteins in 11 species: Archae - 0; Bacteria - 0; Metazoa - 0; Fungi - 0; Plants - 66; Viruses - 0; Other Eukaryotes - 0 (source: NCBI BLink).	4.80548	2.61782	3.25532	1.94461	4.72308	-0.876312	-0.56188	-1.3052	-0.0249525	_	_	D	_
AT1G02390	Chr1:480852-483292[+]	protein_coding_gene	ATGPAT2, GPAT2	glycerol-3-phosphate acyltransferase 2	0.492924	2.23445	4.40482	3.0509	4.48964	2.18046	3.15962	2.62977	3.18714	U	U	U	U
AT1G02400	Chr1:486801-489577[+]	protein_coding_gene	ATGA2OX4, ATGA2OX6, DTA1, GA2OX6	gibberellin 2-oxidase 6	5.61888	19.0373	26.3851	64.832	130.153	1.76047	2.23137	3.52835	4.53378	U	U	U	U
AT1G02405	Chr1:489979-490505[-]	protein_coding_gene	#N/A	proline-rich family protein	1.12565	3.08661	2.50639	3.89678	2.81518	1.45526	1.15485	1.79152	1.32246	U	U	U	U
AT1G02410	Chr1:490925-492926[+]	protein_coding_gene	#N/A	cytochrome c oxidase assembly protein CtaG / Cox11 family	20.9425	18.0192	19.5366	19.3644	23.4105	-0.216899	-0.100254	-0.113027	0.160722	_	_	_	_
AT1G02420	Chr1:493683-495158[+]	protein_coding_gene	#N/A	Pentatricopeptide repeat (PPR) superfamily protein	3.73578	4.49676	3.93833	4.15019	3.18646	0.267476	0.0761743	0.151768	-0.229454	_	_	_	_
AT1G02430	Chr1:495050-496062[-]	protein_coding_gene	ATARFD1B, ARFD1B	ADP-ribosylation factor D1B	0.752475	0.444886	0.283487	0.791466	0.699972	-0.758195	-1.40833	0.0728828	-0.104345	_	D	_	_
AT1G02440	Chr1:496586-497479[-]	protein_coding_gene	ATARFD1A, ARFD1A	ADP-ribosylation factor D1A	0.223692	0.109338	0.107646	0.366734	0.322677	-1.03265	-1.05515	0.713195	0.528557	_	_	_	_
AT1G02450	Chr1:497976-498516[-]	protein_coding_gene	NIMIN1, NIMIN-1	NIM1-interacting 1	0.741977	1.1579	1.87342	1.39039	1.68488	0.642057	1.33622	0.906034	1.18319	_	U	_	U
AT1G02460	Chr1:504673-507204[-]	protein_coding_gene	#N/A	Pectin lyase-like superfamily protein	1.17186	0.717834	0.467002	1.76328	6.92427	-0.70707	-1.32728	0.589457	2.56285	_	D	_	U
AT1G02470	Chr1:511765-513624[-]	protein_coding_gene	#N/A	Polyketide cyclase/dehydrase and lipid transport superfamily protein	5.82035	10.7533	39.5489	9.29872	12.5038	0.885601	2.76446	0.675925	1.10319	_	U	_	U
AT1G02475	Chr1:513843-515404[-]	protein_coding_gene	#N/A	Polyketide cyclase/dehydrase and lipid transport superfamily protein	101.388	84.4139	103.979	85.7055	83.6429	-0.264334	0.0364053	-0.242427	-0.277572	_	_	_	_
AT1G02490	Chr1:516618-516734[+]	protein_coding_gene	#N/A	unknown protein; Has 0 Blast hits to 0 proteins in 0 species (source: NCBI BLink).	0	33.6402	9.75914	29.3879	0	21.6818	19.8964	21.4868	0	_	_	_	_
AT1G02500	Chr1:518251-520437[+]	protein_coding_gene	SAM1, SAM-1, MAT1, AtSAM1	S-adenosylmethionine synthetase 1	289.007	312.585	348.996	288.025	312.033	0.113144	0.272106	-0.0049104	0.110594	_	_	_	_
AT1G02520	Chr1:523651-528745[+]	protein_coding_gene	PGP11	P-glycoprotein 11	1.55864	1.25728	1.23962	1.53781	1.05122	-0.30998	-0.330387	-0.0194104	-0.568219	_	_	_	_
AT1G02530	Chr1:529795-534677[+]	protein_coding_gene	PGP12	P-glycoprotein 12	0.0581945	0.0989004	0.0629845	0.0742888	0.024691	0.764992	0.114095	0.352208	-1.23656	_	_	_	D
AT1G02560	Chr1:537860-540109[+]	protein_coding_gene	CLPP5, NCLPP5, NCLPP1	nuclear encoded CLP protease 5	253.331	257.345	286.914	245.821	260.066	0.0226801	0.179595	-0.0434155	0.0378542	_	_	_	_
AT1G02570	Chr1:541335-542240[+]	protein_coding_gene	#N/A	unknown protein; BEST Arabidopsis thaliana protein match is: unknown protein (TAIR:AT1G02575.1); Has 108 Blast hits to 55 proteins in 6 species: Archae - 0; Bacteria - 0; Metazoa - 0; Fungi - 0; Plants - 108; Viruses - 0; Other Eukaryotes - 0 (source: NCBI BLink).	2.02766	0.687298	0.737602	1.08957	1.20252	-1.56079	-1.45889	-0.896051	-0.75375	D	D	_	_
AT1G02575	Chr1:543110-544007[+]	protein_coding_gene	#N/A	unknown protein; BEST Arabidopsis thaliana protein match is: unknown protein (TAIR:AT1G02570.1).	0.467373	0.0668212	0.0673163	0.433629	0.286095	-2.80601	-2.79536	-0.108111	-0.708061	D	D	_	_
AT1G02580	Chr1:544783-549202[+]	protein_coding_gene	MEA, EMB173, FIS1, SDG5	SET domain-containing protein	0.202782	0.133931	0.146861	0.275182	0.13638	-0.598403	-0.465451	0.440438	-0.572263	_	_	_	_
AT1G02610	Chr1:553050-555994[-]	protein_coding_gene	#N/A	RING/FYVE/PHD zinc finger superfamily protein	26.8789	1.3232	5.09709	5.63276	4.57797	-4.34436	-2.39873	-2.25456	-2.55369	D	D	D	D
AT1G02620	Chr1:557092-557986[+]	protein_coding_gene	#N/A	Ras-related small GTP-binding family protein	0.945536	0.119061	0.104399	0.411239	0.208674	-2.98933	-3.1789	-1.20114	-2.17983	D	D	D	D
AT1G02630	Chr1:560610-562424[-]	protein_coding_gene	#N/A	Nucleoside transporter family protein	0.304022	0.0672819	0.0762356	0.134197	0.123764	-2.17572	-1.9955	-1.17976	-1.29651	D	D	D	D
AT1G02640	Chr1:564205-567769[+]	protein_coding_gene	BXL2, ATBXL2	beta-xylosidase 2	28.5382	4.31621	3.40298	6.82926	2.67453	-2.72505	-3.06802	-2.06309	-3.41553	D	D	D	D
AT1G02650	Chr1:568704-570418[+]	protein_coding_gene	#N/A	Tetratricopeptide repeat (TPR)-like superfamily protein	2.35281	0.634701	0.445059	1.14942	1.1886	-1.89022	-2.40229	-1.03347	-0.985116	D	D	D	_
AT1G02660	Chr1:571955-574981[-]	protein_coding_gene	#N/A	alpha/beta-Hydrolases superfamily protein	23.8563	7.75557	44.569	12.8594	12.1137	-1.62106	0.90167	-0.891546	-0.97773	D	_	_	_
AT1G02670	Chr1:576046-580299[+]	protein_coding_gene	#N/A	P-loop containing nucleoside triphosphate hydrolases superfamily protein	0.777421	1.22446	3.35945	1.47069	0.952553	0.655371	2.11144	0.919716	0.2931	_	U	_	_
AT1G02680	Chr1:580625-582310[+]	protein_coding_gene	TAF13	TBP-associated factor 13	15.2584	10.8336	11.6961	12.3774	14.7585	-0.494091	-0.383576	-0.301895	-0.0480576	_	_	_	_
AT1G02681	Chr1:582413-582922[+]	pseudogene	#N/A	Pseudogene of AT4G02160	0.0547535	0.0190954	0.0332685	0.451374	0.810294	-1.51923	-0.718624	3.04307	3.88718	_	_	U	U
AT1G02690	Chr1:584260-587219[+]	protein_coding_gene	IMPA-6	importin alpha isoform 6	11.3982	13.3662	10.2422	10.5059	10.1628	0.229783	-0.15428	-0.117606	-0.165508	_	_	_	_
AT1G02700	Chr1:588329-589480[+]	protein_coding_gene	#N/A	unknown protein; FUNCTIONS IN: molecular_function unknown; INVOLVED IN: biological_process unknown; LOCATED IN: mitochondrion; BEST Arabidopsis thaliana protein match is: unknown protein (TAIR:AT4G02140.1); Has 49 Blast hits to 49 proteins in 21 species: Archae - 0; Bacteria - 0; Metazoa - 10; Fungi - 6; Plants - 29; Viruses - 0; Other Eukaryotes - 4 (source: NCBI BLink).	0.30292	0.734045	1.93961	0.184144	0.326654	1.2769	2.67872	-0.718072	0.108823	U	U	_	_
AT1G02720	Chr1:591826-594236[+]	protein_coding_gene	GATL5	galacturonosyltransferase 5	8.42393	7.64277	7.75898	7.60759	10.5234	-0.140398	-0.118626	-0.147054	0.321035	_	_	_	_
AT1G02730	Chr1:594573-598657[-]	protein_coding_gene	ATCSLD5, CSLD5, SOS6	cellulose synthase-like D5	12.5933	15.9241	13.8289	14.455	11.7914	0.338555	0.13503	0.198912	-0.0949213	_	_	_	_
AT1G02740	Chr1:599416-602038[-]	protein_coding_gene	#N/A	MRG family protein	11.3094	8.16544	7.19737	11.0245	10.0687	-0.469919	-0.65198	-0.0368091	-0.167645	_	_	_	_
AT1G02750	Chr1:602497-604292[+]	protein_coding_gene	#N/A	Drought-responsive family protein	22.7017	15.9821	13.1574	17.773	21.6604	-0.506343	-0.786925	-0.353113	-0.0677404	_	_	_	_
AT1G02770	Chr1:604873-606693[-]	protein_coding_gene	#N/A	Protein of unknown function (DUF626)	0.617266	0.506028	0.70204	0.666894	0.534006	-0.28667	0.185658	0.111563	-0.209033	_	_	_	_
AT1G02780	Chr1:607808-609465[-]	protein_coding_gene	emb2386	Ribosomal protein L19e family protein	1187.45	1258.67	1118.57	1019.35	1082.46	0.0840333	-0.0862112	-0.220217	-0.133553	_	_	_	_
AT1G02800	Chr1:613216-616191[-]	protein_coding_gene	ATCEL2, CEL2	cellulase 2	1.58363	1.44292	1.13491	1.51749	1.29306	-0.134243	-0.480654	-0.0615479	-0.292444	_	_	_	_
AT1G02810	Chr1:618265-620480[+]	protein_coding_gene	#N/A	Plant invertase/pectin methylesterase inhibitor superfamily	4.50696	2.59627	1.32434	5.04968	4.97084	-0.795712	-1.76687	0.164037	0.141335	_	D	_	_
AT1G02816	Chr1:621461-622469[+]	protein_coding_gene	#N/A	Protein of unknown function, DUF538	33.2058	53.1952	125.459	17.0289	28.5999	0.679861	1.91771	-0.96345	-0.215425	_	U	_	_
AT1G02820	Chr1:623765-624475[-]	protein_coding_gene	#N/A	Late embryogenesis abundant 3 (LEA3) family protein	29.0015	23.5227	13.7778	41.5143	122.089	-0.302074	-1.07378	0.517481	2.07373	_	D	_	U
AT1G02830	Chr1:625145-625608[-]	protein_coding_gene	#N/A	Ribosomal L22e protein family	0.328972	0.48233	0.299351	0.241483	0.484764	0.552042	-0.136122	-0.446027	0.559304	_	_	_	_
AT1G02840	Chr1:626741-629819[+]	protein_coding_gene	SR1, ATSRP34, SRP34, SR34, At-SR34	RNA-binding (RRM/RBD/RNP motifs) family protein	71.4316	70.4181	59.4479	68.9756	70.0747	-0.0206161	-0.264937	-0.0504763	-0.0276688	_	_	_	_
AT1G02850	Chr1:630505-633259[+]	protein_coding_gene	BGLU11	beta glucosidase 11	71.5255	72.4541	110.39	65.7237	58.9553	0.0186097	0.62608	-0.122044	-0.278836	_	_	_	_
AT1G02860	Chr1:635144-637262[+]	protein_coding_gene	NLA	SPX (SYG1/Pho81/XPR1) domain-containing protein	17.9915	9.22542	10.4856	15.2873	17.5242	-0.963628	-0.778905	-0.234982	-0.0379669	_	_	_	_
AT1G02870	Chr1:637214-638677[-]	protein_coding_gene	#N/A	FUNCTIONS IN: molecular_function unknown; INVOLVED IN: biological_process unknown; EXPRESSED IN: 23 plant structures; EXPRESSED DURING: 13 growth stages; CONTAINS InterPro DOMAIN/s: Ribosome biogenesis protein Nop16 (InterPro:IPR019002); Has 104 Blast hits to 104 proteins in 57 species: Archae - 0; Bacteria - 0; Metazoa - 0; Fungi - 63; Plants - 35; Viruses - 0; Other Eukaryotes - 6 (source: NCBI…	54.6706	45.6266	37.2272	41.9995	47.3164	-0.26089	-0.554408	-0.380393	-0.208425	_	_	_	_
AT1G02880	Chr1:642752-644903[-]	protein_coding_gene	TPK1	thiamin pyrophosphokinase1	18.2644	18.4683	18.4566	40.3975	40.1264	0.0160167	0.0151024	1.14523	1.13552	_	_	U	U
AT1G02890	Chr1:645092-651907[-]	protein_coding_gene	#N/A	AAA-type ATPase family protein	24.4271	22.537	20.1559	30.7575	22.5461	-0.116187	-0.27728	0.332456	-0.115605	_	_	_	_
AT1G02900	Chr1:653765-654343[-]	protein_coding_gene	RALFL1, RALF1, ATRALF1	rapid alkalinization factor 1	41.303	16.1476	24.2636	23.7322	26.721	-1.35493	-0.767453	-0.7994	-0.628272	D	_	_	_
AT1G02910	Chr1:655577-658148[-]	protein_coding_gene	LPA1	tetratricopeptide repeat (TPR)-containing protein	39.4876	34.5579	31.3026	35.5294	33.0721	-0.192384	-0.335117	-0.152386	-0.255785	_	_	_	_
AT1G02920	Chr1:658657-659771[-]	protein_coding_gene	ATGSTF7, GST11, ATGSTF8, GSTF7, ATGST11	glutathione S-transferase 7	378.611	359.725	365.695	353.209	425.047	-0.0738219	-0.0500754	-0.100194	0.166906	_	_	_	_
AT1G02930	Chr1:661177-662456[-]	protein_coding_gene	GSTF6	glutathione S-transferase 6	341.638	438.528	500.767	411.045	572.969	0.3602	0.551671	0.266828	0.745989	_	_	_	_
AT1G02940	Chr1:663079-664128[-]	protein_coding_gene	ATGSTF5, GSTF5	glutathione S-transferase (class phi) 5	0.502961	0.312538	0.489697	0.465486	0.511191	-0.686397	-0.0385564	-0.111706	0.0234154	_	_	_	_
AT1G02950	Chr1:665152-666452[-]	protein_coding_gene	ATGSTF4, GST31, GSTF4	glutathione S-transferase F4	8.52778	7.31794	7.73093	8.58788	11.7347	-0.220732	-0.141528	0.0101318	0.460538	_	_	_	_
AT1G02960	Chr1:666872-669837[-]	protein_coding_gene	#N/A	unknown protein; LOCATED IN: cellular_component unknown; EXPRESSED IN: 23 plant structures; EXPRESSED DURING: 13 growth stages; BEST Arabidopsis thaliana protein match is: unknown protein (TAIR:AT1G02965.1); Has 35333 Blast hits to 34131 proteins in 2444 species: Archae - 798; Bacteria - 22429; Metazoa - 974; Fungi - 991; Plants - 531; Viruses - 0; Other Eukaryotes - 9610 (source: NCBI BLink).	8.63378	9.8432	8.73036	12.6301	9.65602	0.189135	0.0160488	0.548801	0.161436	_	_	_	_
AT1G02970	Chr1:673306-676378[+]	protein_coding_gene	WEE1, ATWEE1	WEE1 kinase homolog	2.01227	2.6661	2.59634	2.02989	2.13785	0.405905	0.367654	0.0125776	0.0873363	_	_	_	_
AT1G02990	Chr1:681396-687315[-]	protein_coding_gene	#N/A	FUNCTIONS IN: molecular_function unknown; INVOLVED IN: biological_process unknown; LOCATED IN: cellular_component unknown; BEST Arabidopsis thaliana protein match is: CW-type Zinc Finger (TAIR:AT3G62900.1).	4.32022	5.37583	6.23516	6.7947	5.31862	0.315382	0.529321	0.653304	0.299947	_	_	_	_
AT1G03000	Chr1:687890-692560[-]	protein_coding_gene	PEX6	peroxin 6	12.1865	10.2555	10.9779	11.5633	7.81838	-0.248886	-0.150682	-0.0757306	-0.640342	_	_	_	_
AT1G03010	Chr1:693480-696382[+]	protein_coding_gene	#N/A	Phototropic-responsive NPH3 family protein	2.04767	1.52743	2.55307	0.600127	0.604246	-0.422875	0.318248	-1.77063	-1.76076	_	_	D	D
AT1G03020	Chr1:698207-698515[-]	protein_coding_gene	#N/A	Thioredoxin superfamily protein	8.34135	11.6954	16.9122	7.17812	22.4698	0.487588	1.01971	-0.216675	1.42963	_	U	_	U
AT1G03030	Chr1:701478-703864[+]	protein_coding_gene	#N/A	P-loop containing nucleoside triphosphate hydrolases superfamily protein	17.5375	20.0459	21.8811	17.4895	19.3795	0.192864	0.319242	-0.00395406	0.144088	_	_	_	_
AT1G03040	Chr1:703906-706631[-]	protein_coding_gene	#N/A	basic helix-loop-helix (bHLH) DNA-binding superfamily protein	37.3913	33.1896	30.3813	41.453	52.3138	-0.171971	-0.299519	0.148774	0.484489	_	_	_	_
AT1G03055	Chr1:710018-711803[-]	protein_coding_gene	#N/A	unknown protein; BEST Arabidopsis thaliana protein match is: unknown protein (TAIR:AT1G64680.1); Has 35333 Blast hits to 34131 proteins in 2444 species: Archae - 798; Bacteria - 22429; Metazoa - 974; Fungi - 991; Plants - 531; Viruses - 0; Other Eukaryotes - 9610 (source: NCBI BLink).	6.68536	2.91731	1.85967	3.92587	3.78557	-1.19636	-1.84595	-0.767991	-0.820493	D	D	_	_
AT1G03060	Chr1:712473-726891[-]	protein_coding_gene	SPI	Beige/BEACH domain ;WD domain, G-beta repeat protein	6.13	10.6846	12.7279	12.5961	9.0277	0.801573	1.05403	1.03902	0.558471	_	U	U	_
AT1G03070	Chr1:729901-731557[+]	protein_coding_gene	#N/A	Bax inhibitor-1 family protein	1.39584	1.50982	3.47749	0.8947	1.52421	0.113242	1.31691	-0.641652	0.126927	_	U	_	_
AT1G03080	Chr1:731611-738056[-]	protein_coding_gene	#N/A	kinase interacting (KIP1-like) family protein	11.4781	22.8378	29.7633	30.7189	52.9763	0.992539	1.37465	1.42024	2.20646	_	U	U	U
AT1G03090	Chr1:739679-744184[+]	protein_coding_gene	MCCA	methylcrotonyl-CoA carboxylase alpha chain, mitochondrial / 3-methylcrotonyl-CoA carboxylase 1 (MCCA)	29.1417	16.4494	16.6684	38.3952	28.3653	-0.82505	-0.805969	0.397841	-0.0389579	_	_	_	_
AT1G03100	Chr1:743885-746479[-]	protein_coding_gene	#N/A	Pentatricopeptide repeat (PPR) superfamily protein	1.46255	2.18258	2.65186	2.31389	1.52267	0.577545	0.858514	0.661831	0.058117	_	_	_	_
AT1G03103	Chr1:747197-748057[+]	protein_coding_gene	#N/A	Bifunctional inhibitor/lipid-transfer protein/seed storage 2S albumin superfamily protein	0	0	0	0.0923536	0.23746	0	0	13.1731	14.5355	_	_	U	U
AT1G03106	Chr1:748102-749034[-]	protein_coding_gene	#N/A	unknown protein; Has 35333 Blast hits to 34131 proteins in 2444 species: Archae - 798; Bacteria - 22429; Metazoa - 974; Fungi - 991; Plants - 531; Viruses - 0; Other Eukaryotes - 9610 (source: NCBI BLink).	0.148717	0.051446	0.101437	0.127654	0.178846	-1.53126	-0.55194	-0.220315	0.266132	D	_	_	_
AT1G03110	Chr1:749246-751963[+]	protein_coding_gene	TRM82, AtTRM82	Transducin/WD40 repeat-like superfamily protein	12.2811	12.037	10.1714	10.8048	13.6094	-0.0289639	-0.271921	-0.184767	0.148164	_	_	_	_
AT1G03120	Chr1:752271-753140[+]	protein_coding_gene	ATRAB28, RAB28	responsive to abscisic acid 28	0.820365	1.29744	1.6607	0.776177	0.810939	0.661324	1.01744	-0.0798793	-0.0166723	_	U	_	_
AT1G03130	Chr1:753307-754198[-]	protein_coding_gene	PSAD-2	photosystem I subunit D-2	568.67	287.775	316.571	240.775	151.215	-0.98265	-0.845063	-1.23991	-1.91099	_	_	D	D
AT1G03140	Chr1:754371-756303[-]	protein_coding_gene	#N/A	splicing factor Prp18 family protein	41.4307	29.4121	29.8751	31.4541	29.6157	-0.49429	-0.471757	-0.397452	-0.484338	_	_	_	_
AT1G03150	Chr1:756414-758612[+]	protein_coding_gene	#N/A	Acyl-CoA N-acyltransferases (NAT) superfamily protein	35.9523	30.4181	25.5702	25.0803	29.2602	-0.241154	-0.49162	-0.519529	-0.297144	_	_	_	_
AT1G03160	Chr1:761282-766158[+]	protein_coding_gene	FZL	FZO-like	18.8443	18.5376	19.8204	18.5794	16.3143	-0.0236737	0.0728578	-0.0204243	-0.207991	_	_	_	_
AT1G03170	Chr1:769632-770684[+]	protein_coding_gene	#N/A	Protein of unknown function (DUF3049)	0.707355	0.511195	0.343302	1.13702	0.963386	-0.468553	-1.04293	0.684744	0.445674	_	D	_	_
AT1G03180	Chr1:773411-775344[+]	protein_coding_gene	#N/A	unknown protein; FUNCTIONS IN: molecular_function unknown; INVOLVED IN: biological_process unknown; LOCATED IN: mitochondrion; EXPRESSED IN: 15 plant structures; EXPRESSED DURING: 8 growth stages; Has 35333 Blast hits to 34131 proteins in 2444 species: Archae - 798; Bacteria - 22429; Metazoa - 974; Fungi - 991; Plants - 531; Viruses - 0; Other Eukaryotes - 9610 (source: NCBI BLink).	3.41452	2.88385	2.88141	3.17939	4.12353	-0.243686	-0.244907	-0.102932	0.272196	_	_	_	_
AT1G03190	Chr1:775527-780062[+]	protein_coding_gene	ATXPD, UVH6	RAD3-like DNA-binding helicase protein	5.97411	5.59778	5.41748	5.92508	4.57844	-0.0938689	-0.141102	-0.0118891	-0.383867	_	_	_	_
AT1G03200	Chr1:780602-781285[+]	protein_coding_gene	#N/A	unknown protein; BEST Arabidopsis thaliana protein match is: unknown protein (TAIR:AT1G03240.1); Has 2 Blast hits to 2 proteins in 1 species: Archae - 0; Bacteria - 0; Metazoa - 0; Fungi - 0; Plants - 2; Viruses - 0; Other Eukaryotes - 0 (source: NCBI BLink).	11.0451	10.0909	8.21309	14.8733	11.6893	-0.130352	-0.427409	0.429318	0.081782	_	_	_	_
AT1G03210	Chr1:782948-784240[+]	protein_coding_gene	#N/A	Phenazine biosynthesis PhzC/PhzF protein	21.4077	20.3095	16.8015	21.7542	23.6418	-0.075975	-0.34954	0.0231641	0.14321	_	_	_	_
AT1G03220	Chr1:787122-788651[+]	protein_coding_gene	#N/A	Eukaryotic aspartyl protease family protein	212.933	153.121	208.822	163.409	186.629	-0.475727	-0.0281258	-0.381912	-0.190226	_	_	_	_
AT1G03230	Chr1:790091-791592[+]	protein_coding_gene	#N/A	Eukaryotic aspartyl protease family protein	33.6728	23.7295	21.8731	39.1861	31.8927	-0.504902	-0.622426	0.218758	-0.0783574	_	_	_	_
AT1G03240	Chr1:792222-792986[-]	protein_coding_gene	#N/A	unknown protein; BEST Arabidopsis thaliana protein match is: unknown protein (TAIR:AT1G03200.1); Has 2 Blast hits to 2 proteins in 1 species: Archae - 0; Bacteria - 0; Metazoa - 0; Fungi - 0; Plants - 2; Viruses - 0; Other Eukaryotes - 0 (source: NCBI BLink).	0.135129	0.258981	0.142768	0.165	0.022067	0.938458	0.0793296	0.288109	-2.61383	_	_	_	_
AT1G03250	Chr1:793353-795376[-]	protein_coding_gene	#N/A	unknown protein; FUNCTIONS IN: molecular_function unknown; INVOLVED IN: biological_process unknown; LOCATED IN: cellular_component unknown; EXPRESSED IN: 24 plant structures; EXPRESSED DURING: 15 growth stages.	30.4553	31.9999	37.7778	33.5818	43.6163	0.0713741	0.310845	0.140986	0.518174	_	_	_	_
AT1G03260	Chr1:795532-798463[-]	protein_coding_gene	#N/A	SNARE associated Golgi protein family	11.6698	10.0173	10.4096	12.0986	12.1609	-0.220286	-0.164865	0.0520602	0.0594701	_	_	_	_
AT1G03270	Chr1:799191-802436[+]	protein_coding_gene	#N/A	CBS domain-containing protein with a domain of unknown function (DUF21)	2.01026	1.3281	1.53235	1.6411	2.29432	-0.598015	-0.391634	-0.292717	0.190684	_	_	_	_
AT1G03280	Chr1:803035-807066[+]	protein_coding_gene	#N/A	Transcription factor TFIIE, alpha subunit	20.3756	18.9441	20.3862	21.9681	17.7239	-0.105094	0.000750338	0.108568	-0.201146	_	_	_	_
AT1G03290	Chr1:807361-810868[+]	protein_coding_gene	#N/A	unknown protein; FUNCTIONS IN: molecular_function unknown; INVOLVED IN: biological_process unknown; LOCATED IN: cellular_component unknown; EXPRESSED IN: 22 plant structures; EXPRESSED DURING: 13 growth stages; BEST Arabidopsis thaliana protein match is: unknown protein (TAIR:AT4G02880.2).	13.5771	20.0842	23.418	17.3382	19.1889	0.564885	0.786442	0.352779	0.499096	_	_	_	_
AT1G03300	Chr1:811033-813086[-]	protein_coding_gene	ATDUF1, DUF1	DOMAIN OF UNKNOWN FUNCTION 724 1	4.13658	2.5118	2.70719	1.28809	1.2379	-0.719715	-0.61164	-1.6832	-1.74054	_	_	D	D
AT1G03310	Chr1:813471-816749[+]	protein_coding_gene	ATISA2, ISA2, DBE1, BE2	debranching enzyme 1	13.7117	19.5416	31.9479	12.3525	13.9926	0.511141	1.22031	-0.150604	0.0292566	_	U	_	_
AT1G03320	Chr1:817027-817767[+]	protein_coding_gene	#N/A	unknown protein; Has 1038 Blast hits to 683 proteins in 112 species: Archae - 4; Bacteria - 14; Metazoa - 318; Fungi - 117; Plants - 86; Viruses - 8; Other Eukaryotes - 491 (source: NCBI BLink).	0.563471	0.44671	0.503639	0.377051	0.48991	-0.334996	-0.161948	-0.579569	-0.201821	_	_	_	_
AT1G03330	Chr1:817983-819563[-]	protein_coding_gene	#N/A	Small nuclear ribonucleoprotein family protein	47.7354	47.5934	48.5547	41.3205	54.0821	-0.00429803	0.0245514	-0.208202	0.180092	_	_	_	_
AT1G03340	Chr1:819662-821317[+]	protein_coding_gene	#N/A	unknown protein; BEST Arabidopsis thaliana protein match is: unknown protein (TAIR:AT4G02920.1); Has 44 Blast hits to 41 proteins in 13 species: Archae - 0; Bacteria - 1; Metazoa - 0; Fungi - 0; Plants - 43; Viruses - 0; Other Eukaryotes - 0 (source: NCBI BLink).	2.33267	2.19026	2.09774	2.27852	2.34094	-0.0908797	-0.153146	-0.033885	0.00510571	_	_	_	_
AT1G03350	Chr1:822638-824393[-]	protein_coding_gene	#N/A	BSD domain-containing protein	30.2071	39.0672	40.6046	36.8879	35.4871	0.37107	0.426755	0.28826	0.232407	_	_	_	_
AT1G03360	Chr1:824537-826358[+]	protein_coding_gene	ATRRP4, RRP4	ribosomal RNA processing 4	19.9521	17.3122	10.2622	14.2454	16.513	-0.204751	-0.9592	-0.486044	-0.272938	_	_	_	_
AT1G03365	Chr1:826569-830383[+]	protein_coding_gene	#N/A	RING/U-box superfamily protein	8.2418	8.41834	8.94446	9.20537	7.54943	0.0305763	0.118035	0.159516	-0.126592	_	_	_	_
AT1G03370	Chr1:830627-835361[+]	protein_coding_gene	#N/A	C2 calcium/lipid-binding and GRAM domain containing protein	8.55818	10.9692	10.2362	25.7418	17.7806	0.358082	0.258304	1.58874	1.05493	_	_	U	U
AT1G03380	Chr1:835785-840940[+]	protein_coding_gene	ATATG18G, ATG18G	homolog of yeast autophagy 18 (ATG18) G	10.5092	9.84448	14.3514	13.0408	9.41874	-0.0942658	0.449538	0.311379	-0.158047	_	_	_	_
AT1G03400	Chr1:842747-844190[-]	protein_coding_gene	#N/A	2-oxoglutarate (2OG) and Fe(II)-dependent oxygenase superfamily protein	15.358	10.5948	12.4322	11.359	8.26299	-0.535634	-0.304909	-0.435154	-0.894254	_	_	_	_
AT1G03410	Chr1:844436-847683[-]	protein_coding_gene	2A6	2-oxoglutarate (2OG) and Fe(II)-dependent oxygenase superfamily protein	3.79539	4.38346	2.67182	4.91663	4.27003	0.207821	-0.506424	0.373421	0.169998	_	_	_	_
AT1G03420	Chr1:846664-847739[+]	transposable_element_gene	Sadhu4-2	transposable element gene	17.8436	15.9716	14.0208	18.5326	17.3968	-0.159898	-0.347838	0.0546586	-0.0365847	_	_	_	_
AT1G03430	Chr1:847873-849500[+]	protein_coding_gene	AHP5	histidine-containing phosphotransfer factor 5	18.5988	19.3042	15.3663	27.065	24.2863	0.0537052	-0.27544	0.541219	0.384933	_	_	_	_
AT1G03440	Chr1:852366-854032[+]	protein_coding_gene	#N/A	Leucine-rich repeat (LRR) family protein	15.9214	9.11093	6.67469	7.93778	4.58705	-0.805296	-1.25419	-1.00416	-1.79533	_	D	D	D
AT1G03445	Chr1:854410-859701[-]	protein_coding_gene	BSU1	Serine/threonine protein phosphatase family protein	0.0551861	0.0733753	0.0451829	0.0856017	0.0392731	0.410925	-0.28847	0.633242	-0.490658	_	_	_	_
AT1G03457	Chr1:860788-864125[-]	protein_coding_gene	#N/A	RNA-binding (RRM/RBD/RNP motifs) family protein	5.59029	3.96149	2.5269	6.25487	4.81093	-0.496879	-1.14555	0.162057	-0.216607	_	D	_	_
AT1G03470	Chr1:865915-867733[-]	protein_coding_gene	#N/A	Kinase interacting (KIP1-like) family protein	7.41758	8.05535	5.17547	6.24341	6.85039	0.118999	-0.519258	-0.248614	-0.114762	_	_	_	_
AT1G03475	Chr1:869051-871211[-]	protein_coding_gene	LIN2, HEMF1, ATCPO-I	Coproporphyrinogen III oxidase	190.286	180.112	174.071	161.223	166.644	-0.0792751	-0.128494	-0.239112	-0.1914	_	_	_	_
AT1G03495	Chr1:873184-874935[+]	protein_coding_gene	#N/A	HXXXD-type acyl-transferase family protein	0.230622	0.202357	0.654957	0.264456	0.165149	-0.188619	1.50583	0.19749	-0.481737	_	U	_	_
AT1G03502	Chr1:875358-875471[-]	snoRNA	#N/A	snoRNA	136.345	95.4212	55.3641	41.6798	119.164	-0.51488	-1.30024	-1.70984	-0.194313	_	_	_	_
AT1G03506	Chr1:875518-875604[-]	snoRNA	#N/A	snoRNA	0	0	0	0	0	0	0	0	0	_	_	_	_
AT1G03510	Chr1:876258-877547[-]	protein_coding_gene	#N/A	Tetratricopeptide repeat (TPR)-like superfamily protein	2.46448	2.63815	2.88468	2.66686	2.00954	0.0982429	0.227127	0.113858	-0.294417	_	_	_	_
AT1G03520	Chr1:877862-880158[-]	protein_coding_gene	#N/A	Core-2/I-branching beta-1,6-N-acetylglucosaminyltransferase family protein	8.83046	10.3364	14.4533	9.03261	9.57465	0.227173	0.710838	0.0326543	0.116731	_	_	_	_
AT1G03530	Chr1:880496-883391[-]	protein_coding_gene	ATNAF1, NAF1	nuclear assembly factor 1	9.06878	11.2733	7.47374	11.3677	8.77101	0.313929	-0.279078	0.32596	-0.0481654	_	_	_	_
AT1G03540	Chr1:883782-885611[+]	protein_coding_gene	#N/A	Pentatricopeptide repeat (PPR-like) superfamily protein	1.50419	2.21939	2.09223	2.42072	1.67677	0.561173	0.476052	0.686446	0.156697	_	_	_	_
AT1G03545	Chr1:885941-887906[+]	other_RNA	#N/A	Potential natural antisense gene, locus overlaps with AT1G03550	0.996067	1.37275	1.55523	1.53755	0.854082	0.46275	0.642808	0.626314	-0.221866	_	_	_	_
AT1G03550	Chr1:885623-887956[-]	protein_coding_gene	#N/A	Secretory carrier membrane protein (SCAMP) family protein	6.56237	7.47392	7.38479	9.54989	5.54729	0.187648	0.17034	0.541266	-0.242433	_	_	_	_
AT1G03560	Chr1:890156-892410[-]	protein_coding_gene	#N/A	Pentatricopeptide repeat (PPR-like) superfamily protein	5.73289	5.71927	5.98275	6.56215	4.31821	-0.00343158	0.0615461	0.194906	-0.408828	_	_	_	_
AT1G03580	Chr1:892847-894052[+]	pseudogene	#N/A	pseudogene, meprin and TRAF homology (MATH) domain protein -related, weak similarity to ubiquitin-specific protease 12 (Arabidopsis thaliana) GI:11993471; contains weak hit to Pfam PF00917: MATH domain	3.69749	0.797276	0.408037	2.24457	1.40637	-2.21338	-3.17974	-0.720105	-1.39456	D	D	_	D
AT1G03590	Chr1:894254-897518[-]	protein_coding_gene	#N/A	Protein phosphatase 2C family protein	14.3696	12.4571	12.3825	18.9717	29.6322	-0.206051	-0.214717	0.400829	1.04415	_	_	_	U
AT1G03600	Chr1:898876-899655[+]	protein_coding_gene	PSB27	photosystem II family protein	527.362	362.43	282.905	288.358	290.387	-0.541091	-0.898476	-0.870933	-0.860817	_	_	_	_
AT1G03610	Chr1:900887-903003[+]	protein_coding_gene	#N/A	Protein of unknown function (DUF789)	41.807	12.8791	17.46	18.4496	25.8182	-1.69871	-1.25969	-1.18015	-0.695356	D	D	D	_
AT1G03620	Chr1:904319-906186[-]	protein_coding_gene	#N/A	ELMO/CED-12 family protein	2.22042	1.33641	1.44229	2.40575	1.64834	-0.732466	-0.622468	0.115654	-0.429816	_	_	_	_
AT1G03630	Chr1:907642-909376[+]	protein_coding_gene	POR C, PORC	protochlorophyllide oxidoreductase C	98.3134	87.8472	108.147	67.4579	71.5611	-0.162392	0.137534	-0.543401	-0.458212	_	_	_	_
AT1G03650	Chr1:910023-911193[-]	protein_coding_gene	#N/A	Acyl-CoA N-acyltransferases (NAT) superfamily protein	5.59796	5.21378	4.86432	4.36483	6.72688	-0.102571	-0.202663	-0.358975	0.265036	_	_	_	_
AT1G03660	Chr1:911436-911759[-]	protein_coding_gene	#N/A	Ankyrin-repeat containing protein	2.45251	5.14916	2.8809	3.67208	3.69085	1.07008	0.23226	0.582337	0.589692	U	_	_	_
AT1G03680	Chr1:916819-918064[-]	protein_coding_gene	ATHM1, TRX-M1, ATM1, THM1	thioredoxin M-type 1	272.056	232.337	223.172	198.263	215.209	-0.227685	-0.285748	-0.456488	-0.338165	_	_	_	_
AT1G03687	Chr1:918299-920507[+]	protein_coding_gene	#N/A	DTW domain-containing protein	10.238	9.55848	8.3351	8.83671	8.6726	-0.0990807	-0.296662	-0.212352	-0.239397	_	_	_	_
AT1G03700	Chr1:920950-921901[+]	protein_coding_gene	#N/A	Uncharacterised protein family (UPF0497)	0.1916	0.296207	2.27639	0.176879	0.30217	0.628482	3.57051	-0.115329	0.657235	_	U	_	_
AT1G03710	Chr1:923426-924726[+]	protein_coding_gene	#N/A	Cystatin/monellin superfamily protein	0.318366	0.465774	0.250522	0.493725	0.238116	0.548929	-0.345737	0.633005	-0.419006	_	_	_	_
AT1G03730	Chr1:930828-931895[-]	protein_coding_gene	#N/A	unknown protein; BEST Arabidopsis thaliana protein match is: unknown protein (TAIR:AT4G03600.1); Has 50 Blast hits to 50 proteins in 10 species: Archae - 0; Bacteria - 0; Metazoa - 0; Fungi - 0; Plants - 50; Viruses - 0; Other Eukaryotes - 0 (source: NCBI BLink).	8.00128	5.17874	6.1549	4.96366	8.40394	-0.627629	-0.378495	-0.688825	0.070835	_	_	_	_
AT1G03740	Chr1:933512-937043[+]	protein_coding_gene	#N/A	Protein kinase superfamily protein	18.5719	11.3755	13.3101	35.3342	23.2646	-0.707191	-0.4806	0.927943	0.325015	_	_	_	_
AT1G03750	Chr1:937920-941162[+]	protein_coding_gene	CHR9	switch 2	2.47401	2.85634	3.05165	3.88435	3.31974	0.207316	0.302737	0.65082	0.424217	_	_	_	_
AT1G03760	Chr1:941062-943377[-]	protein_coding_gene	#N/A	Prefoldin chaperone subunit family protein	10.2997	8.66347	7.07164	11.6338	10.0428	-0.249585	-0.542485	0.17572	-0.0364407	_	_	_	_
AT1G03770	Chr1:944572-947483[+]	protein_coding_gene	RING1B	RING 1B	4.84805	5.49815	4.02719	8.39737	5.39194	0.181541	-0.26763	0.792532	0.1534	_	_	_	_
AT1G03780	Chr1:947520-951827[-]	protein_coding_gene	TPX2	targeting protein for XKLP2	5.11575	5.09452	4.53734	5.71175	5.56425	-0.00599953	-0.173099	0.158987	0.121241	_	_	_	_
AT1G03790	Chr1:954525-956097[+]	protein_coding_gene	SOM	Zinc finger C-x8-C-x5-C-x3-H type family protein	0.241142	3.23831	39.6395	0.106098	0.662945	3.74723	7.36085	-1.18441	1.45897	U	U	D	U
AT1G03800	Chr1:957261-957998[-]	protein_coding_gene	ERF10, ATERF10	ERF domain protein 10	0.786845	0.836077	1.36338	0.50265	0.647593	0.0875553	0.793029	-0.646515	-0.280988	_	_	_	_
AT1G03820	Chr1:959869-960728[-]	protein_coding_gene	#N/A	unknown protein; FUNCTIONS IN: molecular_function unknown; INVOLVED IN: biological_process unknown; LOCATED IN: endomembrane system; EXPRESSED IN: 21 plant structures; EXPRESSED DURING: 13 growth stages; Has 1345 Blast hits to 1122 proteins in 102 species: Archae - 2; Bacteria - 28; Metazoa - 28; Fungi - 30; Plants - 109; Viruses - 0; Other Eukaryotes - 1148 (source: NCBI BLink).	17.4561	9.23865	5.07731	12.9589	13.8326	-0.917977	-1.78159	-0.429788	-0.335659	_	D	_	_
AT1G03830	Chr1:962016-966757[-]	protein_coding_gene	#N/A	guanylate-binding family protein	3.66285	4.15083	4.35634	5.06036	3.83425	0.180433	0.250149	0.466272	0.0659776	_	_	_	_
AT1G03840	Chr1:967503-970130[-]	protein_coding_gene	MGP	C2H2 and C2HC zinc fingers superfamily protein	0.794397	0.474308	0.463227	0.692291	0.641778	-0.744024	-0.778128	-0.198479	-0.307782	_	_	_	_
AT1G03850	Chr1:976097-977761[-]	protein_coding_gene	#N/A	Glutaredoxin family protein	46.1487	3.63468	9.12803	25.74	36.4991	-3.66639	-2.33791	-0.842278	-0.338429	D	D	_	_
AT1G03860	Chr1:979308-981885[-]	protein_coding_gene	ATPHB2, PHB2	prohibitin 2	130.676	134.649	117.743	105.743	105.868	0.0432093	-0.150353	-0.305432	-0.303728	_	_	_	_
AT1G03870	Chr1:982506-983540[-]	protein_coding_gene	FLA9	FASCICLIN-like arabinoogalactan 9	288.091	156.107	69.4223	85.4187	23.2796	-0.883989	-2.05305	-1.7539	-3.62939	_	D	D	D
AT1G03900	Chr1:991139-993118[+]	protein_coding_gene	ATNAP4, NAP4	non-intrinsic ABC protein 4	77.5809	74.7226	73.176	63.6486	73.5424	-0.0541569	-0.0843309	-0.285573	-0.0771252	_	_	_	_
AT1G03905	Chr1:993400-995784[+]	protein_coding_gene	#N/A	P-loop containing nucleoside triphosphate hydrolases superfamily protein	2.17902	2.85245	3.95273	6.44438	9.07014	0.388521	0.859167	1.56436	2.05744	_	_	U	U
AT1G03910	Chr1:996115-1000437[+]	protein_coding_gene	#N/A	EXPRESSED IN: 24 plant structures; EXPRESSED DURING: 13 growth stages; CONTAINS InterPro DOMAIN/s: Cactin protein, cactus-binding domain, C-terminal (InterPro:IPR019134), Cactin, central region (InterPro:IPR018816); BEST Arabidopsis thaliana protein match is: unknown protein (TAIR:AT2G36815.2).	25.4099	27.085	25.5051	33.4306	29.2055	0.0921034	0.00539506	0.395778	0.200849	_	_	_	_
AT1G03920	Chr1:1001321-1004383[+]	protein_coding_gene	#N/A	Protein kinase family protein	0.942224	0.981375	0.57105	1.37255	0.862739	0.0587338	-0.722443	0.542712	-0.127144	_	_	_	_
AT1G03930	Chr1:1004769-1008370[+]	protein_coding_gene	ADK1, CKL9ALPHA, CKL9BETA	dual specificity kinase 1	17.1191	17.962	14.9211	24.2639	18.7687	0.0693411	-0.198253	0.503204	0.132722	_	_	_	_
AT1G03935	Chr1:1008810-1008896[+]	snoRNA	#N/A	snoRNA	0	0	0	0	0	0	0	0	0	_	_	_	_
AT1G03940	Chr1:1009542-1011056[-]	protein_coding_gene	#N/A	HXXXD-type acyl-transferase family protein	0.213546	0.221363	1.03789	0.210723	0.443434	0.0518648	2.28098	-0.0191982	1.05414	_	U	_	U
AT1G03950	Chr1:1011172-1013365[-]	protein_coding_gene	VPS2.3	vacuolar protein sorting-associated protein 2.3	13.9145	13.4528	15.6064	13.988	16.9067	-0.0486826	0.165549	0.00760063	0.281006	_	_	_	_
AT1G03960	Chr1:1013715-1017929[+]	protein_coding_gene	#N/A	Calcium-binding EF hand family protein	5.36983	6.62515	6.52414	8.58412	8.85576	0.303076	0.280911	0.676793	0.721739	_	_	_	_
AT1G03970	Chr1:1018100-1019247[+]	protein_coding_gene	GBF4	G-box binding factor 4	23.9737	15.1345	17.6704	21.7057	27.5629	-0.663611	-0.440118	-0.143379	0.201275	_	_	_	_
AT1G03980	Chr1:1018570-1022108[-]	protein_coding_gene	ATPCS2, PCS2	phytochelatin synthase 2	0.447398	0.417711	0.262238	0.834758	0.511886	-0.0990514	-0.770659	0.899784	0.19426	_	_	_	_
AT1G03982	Chr1:1022251-1023719[-]	protein_coding_gene	#N/A	PAK-box/P21-Rho-binding family protein	0	0	0	0.072599	0.0701274	0	0	12.8259	12.776	_	_	U	U
AT1G03990	Chr1:1024847-1027616[+]	protein_coding_gene	#N/A	Long-chain fatty alcohol dehydrogenase family protein	0.0437717	0.043278	0.0524356	0.0577994	0.0840965	-0.0163608	0.260494	0.400976	0.941889	_	_	_	_
AT1G04000	Chr1:1028106-1029119[-]	protein_coding_gene	#N/A	unknown protein; BEST Arabidopsis thaliana protein match is: unknown protein (TAIR:AT5G44060.1); Has 62 Blast hits to 62 proteins in 10 species: Archae - 0; Bacteria - 0; Metazoa - 0; Fungi - 0; Plants - 62; Viruses - 0; Other Eukaryotes - 0 (source: NCBI BLink).	7.88699	11.12	9.18758	12.2378	14.5553	0.49561	0.22021	0.633797	0.883997	_	_	_	_
AT1G04010	Chr1:1031200-1036237[-]	protein_coding_gene	PSAT1, ATPSAT1	phospholipid sterol acyl transferase 1	2.79749	2.47321	2.70451	2.27357	3.32198	-0.177748	-0.0487656	-0.299172	0.24791	_	_	_	_
AT1G04020	Chr1:1036537-1040224[+]	protein_coding_gene	ATBARD1, BARD1, ROW1	breast cancer associated RING 1	5.09112	13.1132	13.3189	6.50977	7.945	1.36496	1.38742	0.354623	0.642063	U	U	_	_
AT1G04030	Chr1:1040383-1042892[+]	protein_coding_gene	#N/A	unknown protein; BEST Arabidopsis thaliana protein match is: unknown protein (TAIR:AT5G44040.1); Has 1835 Blast hits to 1511 proteins in 238 species: Archae - 7; Bacteria - 164; Metazoa - 377; Fungi - 135; Plants - 187; Viruses - 22; Other Eukaryotes - 943 (source: NCBI BLink).	3.17037	3.78921	3.53758	3.86986	3.0763	0.257245	0.158111	0.287629	-0.0434549	_	_	_	_
AT1G04040	Chr1:1042362-1043864[-]	protein_coding_gene	#N/A	HAD superfamily, subfamily IIIB acid phosphatase	214.917	198.234	140.264	168.738	193.314	-0.116575	-0.615635	-0.348995	-0.152833	_	_	_	_
AT1G04050	Chr1:1045598-1049297[-]	protein_coding_gene	SUVR1, SDG13	homolog of SU(var)3-9 1	1.39684	1.26003	1.14468	1.90412	1.78434	-0.148708	-0.28722	0.446955	0.353222	_	_	_	_
AT1G04070	Chr1:1050553-1051186[-]	protein_coding_gene	TOM22-I, ATTOM22-I	translocase of outer membrane 22-I	13.8372	18.4408	13.6072	13.0046	13.9671	0.414349	-0.0241818	-0.0895299	0.0134805	_	_	_	_
AT1G04080	Chr1:1051312-1056827[+]	protein_coding_gene	PRP39	Tetratricopeptide repeat (TPR)-like superfamily protein	41.0131	46.9685	43.5097	54.6281	44.3921	0.195609	0.0852523	0.413558	0.114218	_	_	_	_
AT1G04090	Chr1:1057151-1059419[+]	protein_coding_gene	#N/A	Plant protein of unknown function (DUF946)	0.340469	0.50866	0.403615	0.566074	0.660038	0.579164	0.24545	0.73345	0.955005	_	_	_	_
AT1G04100	Chr1:1059506-1061191[+]	protein_coding_gene	IAA10	indoleacetic acid-induced protein 10	3.56014	2.84314	3.6587	4.92411	4.59643	-0.324448	0.039397	0.467928	0.368579	_	_	_	_
AT1G04110	Chr1:1061457-1063784[-]	protein_coding_gene	SDD1	Subtilase family protein	2.17651	2.73732	1.70366	2.89978	2.0663	0.330746	-0.353377	0.413925	-0.0749666	_	_	_	_
AT1G04120	Chr1:1064450-1071047[-]	protein_coding_gene	MRP5	multidrug resistance-associated protein 5	17.6973	29.9671	38.3515	27.3236	46.8653	0.75985	1.11575	0.626618	1.40499	_	U	_	U
AT1G04130	Chr1:1073427-1075568[+]	protein_coding_gene	TPR2, AtTPR2	Tetratricopeptide repeat (TPR)-like superfamily protein	11.5555	7.50618	7.84209	6.05272	11.1303	-0.622428	-0.559269	-0.932923	-0.0540872	_	_	_	_
AT1G04140	Chr1:1075543-1080630[-]	protein_coding_gene	#N/A	Transducin family protein / WD-40 repeat family protein	36.9091	42.1334	46.0365	42.2637	33.6402	0.190988	0.318802	0.195442	-0.13379	_	_	_	_
AT1G04160	Chr1:1086495-1096146[+]	protein_coding_gene	XIB, ATXIB, XI-8, XI-B	myosin XI B	1.61755	2.56123	2.96986	3.37153	2.83423	0.663023	0.876581	1.05959	0.809143	_	_	U	_
AT1G04170	Chr1:1096946-1099898[+]	protein_coding_gene	EIF2 GAMMA	eukaryotic translation initiation factor 2 gamma subunit	112.373	110.397	102.808	93.4915	101.693	-0.0255945	-0.128343	-0.265388	-0.144075	_	_	_	_
AT1G04180	Chr1:1104623-1105988[+]	protein_coding_gene	YUC9	YUCCA 9	0.586289	0.997826	1.17892	0.606973	0.912035	0.767166	1.00777	0.0500195	0.637468	_	U	_	_
AT1G04190	Chr1:1106428-1108715[-]	protein_coding_gene	TPR3	Tetratricopeptide repeat (TPR)-like superfamily protein	31.772	30.2508	27.2127	27.2796	33.124	-0.0707826	-0.223476	-0.219933	0.060121	_	_	_	_
AT1G04200	Chr1:1109482-1114107[+]	protein_coding_gene	#N/A	FUNCTIONS IN: molecular_function unknown; INVOLVED IN: N-terminal protein myristoylation; LOCATED IN: cellular_component unknown; EXPRESSED IN: 22 plant structures; EXPRESSED DURING: 13 growth stages; CONTAINS InterPro DOMAIN/s: Dymeclin (InterPro:IPR019142); Has 395 Blast hits to 389 proteins in 117 species: Archae - 0; Bacteria - 0; Metazoa - 262; Fungi - 21; Plants - 68; Viruses - 0; Other Euk…	11.3493	15.8147	18.3321	25.7531	20.1099	0.478663	0.691768	1.18214	0.825302	_	_	U	_
AT1G04210	Chr1:1114405-1119739[+]	protein_coding_gene	#N/A	Leucine-rich repeat protein kinase family protein	19.2853	23.249	19.6031	26.0562	24.5633	0.269667	0.0235802	0.434125	0.349003	_	_	_	_
AT1G04220	Chr1:1119699-1122526[-]	protein_coding_gene	KCS2	3-ketoacyl-CoA synthase 2	3.9824	32.0946	225.896	7.29892	56.5199	3.01062	5.82587	0.874043	3.82705	U	U	_	U
AT1G04230	Chr1:1125518-1128168[+]	protein_coding_gene	#N/A	Protein of unknown function (DUF2361)	7.50652	8.24083	10.0551	9.84489	7.69492	0.134645	0.421711	0.39123	0.035762	_	_	_	_
AT1G04240	Chr1:1128188-1129551[-]	protein_coding_gene	SHY2, IAA3	AUX/IAA transcriptional regulator family protein	24.9948	32.5675	27.9436	35.4996	32.5692	0.381805	0.16089	0.506175	0.38188	_	_	_	_
AT1G04250	Chr1:1136258-1138613[+]	protein_coding_gene	AXR3, IAA17	AUX/IAA transcriptional regulator family protein	36.1644	31.6815	29.0438	26.0455	39.5816	-0.19093	-0.31634	-0.473536	0.13026	_	_	_	_
AT1G04260	Chr1:1140528-1141365[-]	protein_coding_gene	MPI7, MPIP7, PRA1.D	CAMV movement protein interacting protein 7	30.3349	28.7186	29.4022	25.6929	25.3698	-0.0789931	-0.0450544	-0.239609	-0.257866	_	_	_	_
AT1G04270	Chr1:1141604-1143053[-]	protein_coding_gene	RPS15	cytosolic ribosomal protein S15	721.834	692.272	592.024	499.212	737.651	-0.0603281	-0.286011	-0.532014	0.0312713	_	_	_	_
AT1G04280	Chr1:1143436-1146654[-]	protein_coding_gene	#N/A	P-loop containing nucleoside triphosphate hydrolases superfamily protein	21.8499	10.8498	23.7671	13.8326	9.41526	-1.00996	0.121339	-0.659554	-1.21455	D	_	_	D
AT1G04290	Chr1:1147523-1148533[-]	protein_coding_gene	#N/A	Thioesterase superfamily protein	26.8101	19.592	22.0417	15.5363	22.5324	-0.452512	-0.282541	-0.787133	-0.250776	_	_	_	_
AT1G04295	Chr1:1147781-1148435[+]	other_RNA	#N/A	other RNA	2.09831	1.08789	1.46314	1.14562	1.10344	-0.947689	-0.520157	-0.873094	-0.927213	_	_	_	_
AT1G04300	Chr1:1148597-1154652[-]	protein_coding_gene	#N/A	TRAF-like superfamily protein	22.2222	22.7303	24.2265	28.6987	25.1651	0.0326151	0.124584	0.368984	0.179423	_	_	_	_
AT1G04310	Chr1:1154764-1157711[-]	protein_coding_gene	ERS2	ethylene response sensor 2	12.0598	17.8284	26.4628	2.75659	4.11612	0.563971	1.13376	-2.12925	-1.55085	_	U	D	D
AT1G04330	Chr1:1161311-1161982[-]	protein_coding_gene	#N/A	unknown protein; FUNCTIONS IN: molecular_function unknown; INVOLVED IN: biological_process unknown; LOCATED IN: chloroplast; BEST Arabidopsis thaliana protein match is: unknown protein (TAIR:AT3G23170.1); Has 74 Blast hits to 74 proteins in 6 species: Archae - 0; Bacteria - 0; Metazoa - 0; Fungi - 0; Plants - 74; Viruses - 0; Other Eukaryotes - 0 (source: NCBI BLink).	1.69598	1.44521	1.43878	0.73146	1.46609	-0.230839	-0.237272	-1.21326	-0.210144	_	_	D	_
AT1G04340	Chr1:1163097-1164851[-]	protein_coding_gene	#N/A	HR-like lesion-inducing protein-related	41.0523	38.7806	35.4626	28.9084	32.094	-0.0821279	-0.211165	-0.505974	-0.355159	_	_	_	_
AT1G04350	Chr1:1165165-1166768[+]	protein_coding_gene	#N/A	2-oxoglutarate (2OG) and Fe(II)-dependent oxygenase superfamily protein	28.5984	21.2115	23.0616	21.1609	16.3605	-0.431088	-0.310442	-0.434533	-0.805717	_	_	_	_
AT1G04360	Chr1:1167457-1168878[-]	protein_coding_gene	#N/A	RING/U-box superfamily protein	3.7379	1.82602	2.21042	3.32504	2.17937	-1.03352	-0.757905	-0.168856	-0.778314	D	_	_	_
AT1G04370	Chr1:1175177-1175578[+]	protein_coding_gene	ATERF14, ERF14	Ethylene-responsive element binding factor 14	0.263493	0.214678	0.133142	0.805278	1.46713	-0.295578	-0.984745	1.61169	2.47712	_	_	U	U
AT1G04380	Chr1:1176921-1178407[-]	protein_coding_gene	#N/A	2-oxoglutarate (2OG) and Fe(II)-dependent oxygenase superfamily protein	0.135134	0.0933754	0.192234	0.123627	0.189721	-0.533229	0.508441	-0.128387	0.489458	_	_	_	_
AT1G04390	Chr1:1179363-1183704[-]	protein_coding_gene	#N/A	BTB/POZ domain-containing protein	3.24229	3.25756	3.51958	3.90506	3.04362	0.0067786	0.11839	0.268331	-0.0912246	_	_	_	_
AT1G04400	Chr1:1185550-1188517[-]	protein_coding_gene	CRY2, FHA, AT-PHH1, PHH1, ATCRY2	cryptochrome 2	65.2086	46.3419	76.6867	47.4239	73.2312	-0.492745	0.233914	-0.459448	0.167396	_	_	_	_
AT1G04410	Chr1:1189078-1191412[-]	protein_coding_gene	#N/A	Lactate/malate dehydrogenase family protein	860.442	923.281	1077.75	702.334	989.267	0.101692	0.324873	-0.292921	0.201282	_	_	_	_
AT1G04420	Chr1:1191608-1193884[+]	protein_coding_gene	#N/A	NAD(P)-linked oxidoreductase superfamily protein	76.335	64.1625	58.3359	60.6206	62.4925	-0.250614	-0.387961	-0.332537	-0.288662	_	_	_	_
AT1G04425	Chr1:1194187-1196889[+]	other_RNA	#N/A	other RNA	7.55249	8.14311	8.27332	7.88351	7.73518	0.108627	0.131514	0.0618857	0.0344825	_	_	_	_
AT1G04430	Chr1:1198118-1201527[+]	protein_coding_gene	#N/A	S-adenosyl-L-methionine-dependent methyltransferases superfamily protein	70.4164	88.7858	90.64	94.4234	90.3145	0.334417	0.364236	0.423233	0.359046	_	_	_	_
AT1G04440	Chr1:1202255-1205803[+]	protein_coding_gene	CKL13	casein kinase like 13	41.5246	41.0564	48.5124	53.3029	42.1689	-0.0163591	0.224387	0.360248	0.0222131	_	_	_	_
AT1G04445	Chr1:1207344-1207862[+]	protein_coding_gene	#N/A	C2H2-like zinc finger protein	0.222827	0.273917	0.174106	1.21414	1.86087	0.297803	-0.35594	2.44589	3.06192	_	_	U	U
AT1G04480	Chr1:1216095-1217467[+]	protein_coding_gene	#N/A	Ribosomal protein L14p/L23e family protein	356.173	373.291	260.041	256.829	379.307	0.0677226	-0.453839	-0.47177	0.0907878	_	_	_	_
AT1G04490	Chr1:1217948-1220137[-]	protein_coding_gene	#N/A	Protein of unknown function (DUF3527)	0.55051	0.980931	1.37552	2.11447	2.52441	0.833371	1.32112	1.94144	2.19709	_	U	U	U
AT1G04500	Chr1:1221433-1224366[-]	protein_coding_gene	#N/A	CCT motif family protein	0.601631	0.347573	1.0019	0.611208	0.518379	-0.791545	0.735778	0.0227841	-0.214868	_	_	_	_
AT1G04510	Chr1:1226575-1230827[+]	protein_coding_gene	MAC3A	MOS4-associated complex 3A	44.1274	44.2009	40.843	43.4378	44.3891	0.002401	-0.111586	-0.0227237	0.00853071	_	_	_	_
AT1G04520	Chr1:1231578-1234032[+]	protein_coding_gene	PDLP2	plasmodesmata-located protein 2	18.1464	18.1389	9.92103	17.0768	19.0155	-0.000596396	-0.871121	-0.0876457	0.0674925	_	_	_	_
AT1G04530	Chr1:1234176-1236034[-]	protein_coding_gene	TPR4	Tetratricopeptide repeat (TPR)-like superfamily protein	42.4858	29.7964	23.0292	42.6676	51.1851	-0.511843	-0.883516	0.00616023	0.268743	_	_	_	_
AT1G04540	Chr1:1237256-1239061[+]	protein_coding_gene	#N/A	Calcium-dependent lipid-binding (CaLB domain) family protein	0.0345193	0.0438927	0.044128	0.078657	0.0307851	0.346489	0.3542	1.18794	-0.16512	_	_	U	_
AT1G04550	Chr1:1240375-1242121[+]	protein_coding_gene	IAA12, BDL	AUX/IAA transcriptional regulator family protein	23.1272	17.2622	11.4671	21.9781	20.9855	-0.421974	-1.01209	-0.0735239	-0.140198	_	D	_	_
AT1G04555	Chr1:1242558-1244244[+]	protein_coding_gene	#N/A	unknown protein; FUNCTIONS IN: molecular_function unknown; INVOLVED IN: biological_process unknown; LOCATED IN: cellular_component unknown; BEST Arabidopsis thaliana protein match is: unknown protein (TAIR:AT4G33380.1); Has 84 Blast hits to 83 proteins in 15 species: Archae - 0; Bacteria - 0; Metazoa - 9; Fungi - 0; Plants - 75; Viruses - 0; Other Eukaryotes - 0 (source: NCBI BLink).	8.78989	7.53683	7.61613	7.78397	9.82597	-0.221887	-0.206787	-0.175339	0.160755	_	_	_	_
AT1G04560	Chr1:1244947-1246059[+]	protein_coding_gene	#N/A	AWPM-19-like family protein	0.00887881	0.773256	8.36463	0.008113	0.320604	6.44283	9.8781	-0.129978	5.1727	U	U	_	U
AT1G04570	Chr1:1246728-1248775[-]	protein_coding_gene	#N/A	Major facilitator superfamily protein	0.372629	3.1689	3.26973	7.7092	22.0095	3.08814	3.13333	4.37073	5.8842	U	U	U	U
AT1G04580	Chr1:1252122-1257510[-]	protein_coding_gene	AAO4, ATAO-4, ATAO2, AO4	aldehyde oxidase 4	0.0133463	0.0279869	0.209958	0.0330747	0.0900328	1.06775	3.97458	1.30864	2.75309	U	U	U	U
AT1G04590	Chr1:1258577-1261426[-]	protein_coding_gene	#N/A	BEST Arabidopsis thaliana protein match is: Pentatricopeptide repeat (PPR) superfamily protein (TAIR:AT4G18975.4); Has 111 Blast hits to 111 proteins in 15 species: Archae - 0; Bacteria - 0; Metazoa - 0; Fungi - 0; Plants - 109; Viruses - 0; Other Eukaryotes - 2 (source: NCBI BLink).	19.5748	19.4913	16.9838	18.4611	20.5529	-0.00616725	-0.204838	-0.084509	0.0703444	_	_	_	_
AT1G04600	Chr1:1262123-1272376[+]	protein_coding_gene	XIA, ATXIA	myosin XI A	0.0647146	0.0695997	0.0765998	0.101365	0.102385	0.104974	0.243215	0.647316	0.661759	_	_	_	_
AT1G04610	Chr1:1279388-1281618[+]	protein_coding_gene	YUC3	YUCCA 3	0.956451	0.411935	0.320984	0.4462	0.466805	-1.21525	-1.57516	-1.09998	-1.03486	D	D	D	D
AT1G04620	Chr1:1282741-1286584[-]	protein_coding_gene	#N/A	coenzyme F420 hydrogenase family / dehydrogenase, beta subunit family	4.36637	5.03731	9.02403	5.68047	9.43181	0.206219	1.04734	0.379575	1.1111	_	U	_	U
AT1G04625	Chr1:1287831-1289820[-]	protein_coding_gene	#N/A	Polynucleotidyl transferase, ribonuclease H-like superfamily protein	0.00934765	0.0294909	0.0171707	0.00854097	0.00921512	1.65654	0.876571	-0.130058	-0.0205786	_	_	_	_
AT1G04630	Chr1:1289734-1291112[-]	protein_coding_gene	MEE4	GRIM-19 protein	61.1386	58.4306	54.1706	48.2718	53.9345	-0.0653594	-0.174573	-0.340903	-0.180875	_	_	_	_
AT1G04635	Chr1:1291314-1291995[+]	protein_coding_gene	EMB1687	ribonuclease P family protein / Rpp14 family protein	5.72559	7.01568	4.52755	5.98807	9.5915	0.293158	-0.338693	0.0646666	0.744331	_	_	_	_
AT1G04640	Chr1:1292080-1293357[+]	protein_coding_gene	LIP2	lipoyltransferase 2	58.7141	37.5969	35.1688	39.5129	45.0321	-0.643093	-0.739411	-0.571383	-0.382753	_	_	_	_
AT1G04645	Chr1:1293770-1294263[-]	protein_coding_gene	#N/A	Plant self-incompatibility protein S1 family	0	0.0219928	0.0383848	0.154094	0.554275	11.1035	11.9067	13.9116	15.7583	_	_	U	U
AT1G04650	Chr1:1294893-1299002[-]	protein_coding_gene	#N/A	unknown protein; Has 30201 Blast hits to 17322 proteins in 780 species: Archae - 12; Bacteria - 1396; Metazoa - 17338; Fungi - 3422; Plants - 5037; Viruses - 0; Other Eukaryotes - 2996 (source: NCBI BLink).	1.08776	1.88923	2.14867	1.57685	1.64586	0.796432	0.982077	0.535681	0.597477	_	_	_	_
AT1G04660	Chr1:1300486-1301773[-]	protein_coding_gene	#N/A	glycine-rich protein	1.72727	1.00563	0.727313	0.853017	1.00385	-0.780388	-1.24783	-1.01784	-0.782944	_	D	D	_
AT1G04680	Chr1:1303529-1307884[-]	protein_coding_gene	#N/A	Pectin lyase-like superfamily protein	38.7343	33.7712	38.8009	41.8777	54.3205	-0.197818	0.00247845	0.112571	0.487885	_	_	_	_
AT1G04690	Chr1:1313564-1315750[+]	protein_coding_gene	KAB1, KV-BETA1	potassium channel beta subunit 1	117.55	148.681	168.772	107.727	155.601	0.338946	0.521801	-0.125895	0.404577	_	_	_	_
AT1G04700	Chr1:1316254-1320919[+]	protein_coding_gene	#N/A	PB1 domain-containing protein tyrosine kinase	0.705982	0.974971	1.13899	1.41116	1.14673	0.465722	0.690044	0.999168	0.699815	_	_	_	_
AT1G04710	Chr1:1321904-1324782[+]	protein_coding_gene	KAT1, PKT4	peroxisomal 3-ketoacyl-CoA thiolase 4	19.6134	18.5187	20.2928	18.3766	17.207	-0.0828568	0.0491283	-0.0939697	-0.188844	_	_	_	_
AT1G04730	Chr1:1325296-1331086[-]	protein_coding_gene	CTF18	P-loop containing nucleoside triphosphate hydrolases superfamily protein	3.01247	3.51823	4.09686	3.31616	3.44951	0.223902	0.44357	0.138566	0.195444	_	_	_	_
AT1G04750	Chr1:1331466-1333567[-]	protein_coding_gene	VAMP7B, VAMP721, ATVAMP721, AT VAMP7B	vesicle-associated membrane protein 721	97.7184	99.6023	100.059	87.6758	128.382	0.0275488	0.0341488	-0.156452	0.393741	_	_	_	_
AT1G04760	Chr1:1334760-1336070[+]	protein_coding_gene	ATVAMP726, VAMP726	vesicle-associated membrane protein 726	2.4293	2.90712	3.23031	2.49867	1.96266	0.259049	0.41113	0.0406195	-0.307729	_	_	_	_
AT1G04770	Chr1:1336371-1337849[-]	protein_coding_gene	#N/A	Tetratricopeptide repeat (TPR)-like superfamily protein	31.717	23.6048	22.4754	13.0063	25.4434	-0.426176	-0.496909	-1.28605	-0.317965	_	_	D	_
AT1G04778	Chr1:1339892-1340327[+]	protein_coding_gene	#N/A	unknown protein; FUNCTIONS IN: molecular_function unknown; INVOLVED IN: biological_process unknown; LOCATED IN: cellular_component unknown; Has 0 Blast hits to 0 proteins in 0 species (source: NCBI BLink).	1.64538	1.0487	0.912697	0.862251	0.866671	-0.649814	-0.850206	-0.932233	-0.924857	_	_	_	_
AT1G04780	Chr1:1340669-1343584[-]	protein_coding_gene	#N/A	Ankyrin repeat family protein	20.3519	24.2555	40.5935	25.1978	23.617	0.253148	0.996085	0.308134	0.214662	_	_	_	_
AT1G04790	Chr1:1345036-1348451[+]	protein_coding_gene	#N/A	RING/U-box superfamily protein	14.3496	13.2827	15.0742	16.1574	13.9395	-0.111462	0.0710709	0.171184	-0.0418317	_	_	_	_
AT1G04800	Chr1:1348452-1349286[-]	protein_coding_gene	#N/A	glycine-rich protein	72.2131	54.1572	33.3926	59.6088	57.3996	-0.415107	-1.11273	-0.276735	-0.33122	_	D	_	_
AT1G04810	Chr1:1350180-1355442[+]	protein_coding_gene	#N/A	26S proteasome regulatory complex, non-ATPase subcomplex, Rpn2/Psmd1 subunit	29.2982	30.0093	32.481	30.5515	25.2289	0.0345976	0.148784	0.0604312	-0.215735	_	_	_	_
AT1G04820	Chr1:1356191-1358386[-]	protein_coding_gene	TUA4, TOR2	tubulin alpha-4 chain	494.896	578.565	590.555	405.173	479.664	0.225354	0.254946	-0.288587	-0.0451012	_	_	_	_
AT1G04830	Chr1:1358574-1362019[-]	protein_coding_gene	#N/A	Ypt/Rab-GAP domain of gyp1p superfamily protein	13.2885	14.4287	27.4894	14.3281	16.6125	0.118763	1.0487	0.108669	0.322091	_	U	_	_
AT1G04840	Chr1:1362867-1364962[-]	protein_coding_gene	#N/A	Tetratricopeptide repeat (TPR)-like superfamily protein	1.06017	1.74363	1.70932	2.15963	1.8841	0.717793	0.689122	1.02648	0.829574	_	_	U	_
AT1G04850	Chr1:1365118-1368844[-]	protein_coding_gene	#N/A	ubiquitin-associated (UBA)/TS-N domain-containing protein	55.8449	56.9023	67.8549	54.2728	55.9541	0.0270614	0.281027	-0.0411962	0.00281831	_	_	_	_
AT1G04860	Chr1:1369054-1373101[-]	protein_coding_gene	UBP2, ATUBP2	ubiquitin-specific protease 2	14.8594	15.5024	14.1334	14.7081	12.0425	0.0611157	-0.0722672	-0.014765	-0.303241	_	_	_	_
AT1G04870	Chr1:1373234-1375762[-]	protein_coding_gene	PRMT10, ATPRMT10	protein arginine methyltransferase 10	26.8181	28.0288	26.5838	26.1837	35.6505	0.0637029	-0.0126597	-0.034538	0.410715	_	_	_	_
AT1G04880	Chr1:1375961-1379185[-]	protein_coding_gene	#N/A	HMG (high mobility group) box protein with ARID/BRIGHT DNA-binding domain	0.293295	0.29614	0.361441	0.34655	0.371651	0.0139264	0.301398	0.240703	0.341586	_	_	_	_
AT1G04900	Chr1:1383841-1387895[+]	protein_coding_gene	#N/A	Protein of unknown function (DUF185)	12.83	14.2089	12.708	13.6158	12.8035	0.147274	-0.0137842	0.0857605	-0.00298292	_	_	_	_
AT1G04910	Chr1:1387871-1391187[-]	protein_coding_gene	#N/A	O-fucosyltransferase family protein	17.3559	20.0767	20.8459	18.873	17.158	0.210096	0.264337	0.120898	-0.0165448	_	_	_	_
AT1G04920	Chr1:1391502-1395864[-]	protein_coding_gene	ATSPS3F, SPS3F	sucrose phosphate synthase 3F	0.380782	0.611821	0.572534	0.584537	0.633999	0.68413	0.588383	0.618316	0.7355	_	_	_	_
AT1G04930	Chr1:1396291-1399053[-]	protein_coding_gene	#N/A	hydroxyproline-rich glycoprotein family protein	3.32305	4.33185	3.28438	3.86489	2.47473	0.382474	-0.0168869	0.217919	-0.425235	_	_	_	_
AT1G04940	Chr1:1399182-1400770[+]	protein_coding_gene	TIC20	translocon at the inner envelope membrane of chloroplasts 20	86.5489	76.6742	72.7798	63.341	62.6026	-0.174774	-0.249977	-0.450376	-0.467293	_	_	_	_
AT1G04945	Chr1:1399174-1403112[+]	protein_coding_gene	#N/A	HIT-type Zinc finger family protein	8.81553	10.2983	7.51915	9.56176	8.16223	0.224287	-0.229477	0.117229	-0.111084	_	_	_	_
AT1G04950	Chr1:1403085-1407501[-]	protein_coding_gene	TAFII59, TAF6, ATTAF6	TATA BOX ASSOCIATED FACTOR II 59	13.4395	10.2938	10.7793	12.6251	11.6427	-0.384703	-0.318216	-0.0901846	-0.207054	_	_	_	_
AT1G04960	Chr1:1407801-1410868[-]	protein_coding_gene	#N/A	Protein of unknown function (DUF1664)	24.6822	20.2233	24.0757	21.3779	21.2387	-0.287452	-0.0358932	-0.207351	-0.216775	_	_	_	_
AT1G04970	Chr1:1411170-1413627[+]	protein_coding_gene	#N/A	lipid-binding serum glycoprotein family protein	33.9035	32.3752	41.964	31.081	26.5331	-0.0665451	0.307718	-0.125401	-0.353641	_	_	_	_
AT1G04980	Chr1:1413644-1416144[-]	protein_coding_gene	ATPDIL2-2, ATPDI10, PDI10, PDIL2-2	PDI-like 2-2	24.4668	19.5584	12.7866	15.7504	10.7921	-0.323037	-0.936192	-0.635437	-1.18085	_	_	_	D
AT1G04985	Chr1:1416343-1418482[-]	protein_coding_gene	#N/A	unknown protein; Has 37 Blast hits to 37 proteins in 11 species: Archae - 0; Bacteria - 0; Metazoa - 0; Fungi - 0; Plants - 37; Viruses - 0; Other Eukaryotes - 0 (source: NCBI BLink).	33.7999	29.8301	27.7722	32.5948	31.7923	-0.18025	-0.283377	-0.0523771	-0.0883416	_	_	_	_
AT1G04990	Chr1:1419080-1421789[-]	protein_coding_gene	#N/A	Zinc finger C-x8-C-x5-C-x3-H type family protein	15.802	29.0435	51.8715	24.879	37.9747	0.878108	1.71483	0.654821	1.26493	_	U	_	U
AT1G05000	Chr1:1425593-1428782[+]	protein_coding_gene	#N/A	Phosphotyrosine protein phosphatases superfamily protein	14.4451	10.1198	13.9244	20.8291	19.6106	-0.513399	-0.052965	0.52802	0.441053	_	_	_	_
AT1G05010	Chr1:1431190-1432858[-]	protein_coding_gene	EFE, ACO4, EAT1	ethylene-forming enzyme	667.536	403.088	420.497	416.124	398.497	-0.727751	-0.66675	-0.681832	-0.744277	_	_	_	_
AT1G05020	Chr1:1435254-1437667[-]	protein_coding_gene	#N/A	ENTH/ANTH/VHS superfamily protein	3.16146	1.18485	1.59063	0.982065	0.623997	-1.41588	-0.990988	-1.68669	-2.34096	D	_	D	D
AT1G05030	Chr1:1438152-1441417[-]	protein_coding_gene	#N/A	Major facilitator superfamily protein	6.27804	6.09039	6.21373	8.39006	7.64161	-0.0437795	-0.0148546	0.418366	0.283562	_	_	_	_
AT1G05040	Chr1:1447369-1448448[-]	protein_coding_gene	#N/A	unknown protein; FUNCTIONS IN: molecular_function unknown; INVOLVED IN: biological_process unknown; LOCATED IN: cellular_component unknown; EXPRESSED IN: leaf whorl, flower; EXPRESSED DURING: 4 anthesis; Has 30201 Blast hits to 17322 proteins in 780 species: Archae - 12; Bacteria - 1396; Metazoa - 17338; Fungi - 3422; Plants - 5037; Viruses - 0; Other Eukaryotes - 2996 (source: NCBI BLink).	0.0201757	0.0209672	0	0.0654868	0.141845	0.0554885	-10.9791	1.69809	2.81301	_	_	_	U
AT1G05055	Chr1:1448718-1450887[-]	protein_coding_gene	ATGTF2H2, GTF2H2	general transcription factor II H2	8.641	9.6267	9.39954	7.13527	7.19074	0.155843	0.121392	-0.27623	-0.265058	_	_	_	_
AT1G05060	Chr1:1451030-1452872[-]	protein_coding_gene	#N/A	unknown protein; Has 34 Blast hits to 34 proteins in 13 species: Archae - 0; Bacteria - 0; Metazoa - 0; Fungi - 0; Plants - 34; Viruses - 0; Other Eukaryotes - 0 (source: NCBI BLink).	16.8788	14.7643	15.9967	17.1231	18.7555	-0.193099	-0.077438	0.0207316	0.152101	_	_	_	_
AT1G05061	Chr1:1453216-1454260[-]	pseudogene	#N/A	Pseudogene of AT2G32630; pentatricopeptide (PPR) repeat-containing protein	0.442	1.10488	0.791717	2.38647	2.25714	1.32175	0.840924	2.43273	2.35235	U	_	U	U
AT1G05065	Chr1:1454969-1455220[-]	protein_coding_gene	CLE20	CLAVATA3/ESR-RELATED 20	7.81076	11.6641	12.8652	12.1066	24.0129	0.57854	0.719938	0.632258	1.62027	_	_	_	U
AT1G05070	Chr1:1457063-1458744[-]	protein_coding_gene	#N/A	Protein of unknown function (DUF1068)	25.4789	25.2345	24.1173	25.7858	33.7571	-0.0139055	-0.0792346	0.0172738	0.405888	_	_	_	_
AT1G05090	Chr1:1463202-1465622[+]	protein_coding_gene	#N/A	dentin sialophosphoprotein-related	8.25282	8.71765	10.1849	9.51841	7.76946	0.079052	0.303472	0.205833	-0.0870727	_	_	_	_
AT1G05100	Chr1:1469610-1470881[+]	protein_coding_gene	MAPKKK18	mitogen-activated protein kinase kinase kinase 18	0.237347	14.5766	51.8126	2.87594	29.0368	5.94045	7.7701	3.59891	6.93468	U	U	U	U
AT1G05120	Chr1:1471406-1476078[-]	protein_coding_gene	#N/A	Helicase protein with RING/U-box domain	7.03245	9.12245	11.9984	10.4054	9.00855	0.375393	0.770742	0.565232	0.357267	_	_	_	_
AT1G05135	Chr1:1477500-1478821[-]	pseudogene	#N/A	pseudogene of unknown protein	63.5272	52.5394	46.5887	91.8473	75.6289	-0.273975	-0.447394	0.531863	0.251563	_	_	_	_
AT1G05136	Chr1:1478923-1479063[+]	protein_coding_gene	#N/A	unknown protein; Has 30201 Blast hits to 17322 proteins in 780 species: Archae - 12; Bacteria - 1396; Metazoa - 17338; Fungi - 3422; Plants - 5037; Viruses - 0; Other Eukaryotes - 2996 (source: NCBI BLink).	0	0	1.74863	0	1.88185	0	17.4159	0	17.5218	_	_	_	_
AT1G05140	Chr1:1482548-1484056[+]	protein_coding_gene	#N/A	Peptidase M50 family protein	53.8826	35.7976	39.4509	29.3056	38.6626	-0.589956	-0.449761	-0.878643	-0.478881	_	_	_	_
AT1G05150	Chr1:1484067-1486960[-]	protein_coding_gene	#N/A	Calcium-binding tetratricopeptide family protein	16.3131	18.408	18.6537	16.9428	11.1315	0.174302	0.193431	0.0546413	-0.551383	_	_	_	_
AT1G05160	Chr1:1487378-1490947[-]	protein_coding_gene	CYP88A3, ATKAO1, KAO1	cytochrome P450, family 88, subfamily A, polypeptide 3	4.50391	5.27548	4.76087	6.9005	6.21192	0.228124	0.0800471	0.615522	0.46386	_	_	_	_
AT1G05170	Chr1:1491111-1494248[-]	protein_coding_gene	#N/A	Galactosyltransferase family protein	6.15516	10.7684	9.44181	8.58752	15.9524	0.806935	0.617266	0.480445	1.3739	_	_	_	U
AT1G05180	Chr1:1498114-1501824[-]	protein_coding_gene	AXR1	NAD(P)-binding Rossmann-fold superfamily protein	26.6936	26.1157	27.7856	27.2001	26.8521	-0.0315765	0.0578435	0.0271181	0.00854103	_	_	_	_
AT1G05190	Chr1:1502344-1503830[-]	protein_coding_gene	emb2394	Ribosomal protein L6 family	534.385	424.631	404.275	386.3	414.308	-0.33167	-0.402543	-0.468158	-0.367176	_	_	_	_
AT1G05200	Chr1:1504960-1509152[+]	protein_coding_gene	ATGLR3.4, GLR3.4, GLUR3	glutamate receptor 3.4	15.1792	15.2685	11.4644	17.2939	16.4828	0.00846257	-0.404935	0.188167	0.118866	_	_	_	_
AT1G05205	Chr1:1509103-1510281[-]	protein_coding_gene	#N/A	unknown protein; Has 44 Blast hits to 44 proteins in 16 species: Archae - 0; Bacteria - 0; Metazoa - 0; Fungi - 0; Plants - 44; Viruses - 0; Other Eukaryotes - 0 (source: NCBI BLink).	52.5676	58.1418	60.3301	43.6681	49.8057	0.145402	0.198704	-0.267594	-0.077863	_	_	_	_
AT1G05210	Chr1:1510404-1511683[+]	protein_coding_gene	#N/A	Transmembrane protein 97, predicted	12.8729	10.5749	9.64181	8.14821	7.40135	-0.283693	-0.416961	-0.659781	-0.798476	_	_	_	_
AT1G05220	Chr1:1511907-1513573[+]	protein_coding_gene	#N/A	Transmembrane protein 97, predicted	1.60346	1.50236	0.612736	1.06474	1.10158	-0.0939572	-1.38784	-0.590683	-0.54161	_	D	_	_
AT1G05230	Chr1:1512896-1518805[-]	protein_coding_gene	HDG2	homeodomain GLABROUS 2	9.26389	8.21448	7.74128	8.71588	9.45919	-0.173449	-0.259046	-0.0879717	0.0300985	_	_	_	_
AT1G05240	Chr1:1521137-1522681[+]	protein_coding_gene	#N/A	Peroxidase superfamily protein	43.6541	29.7989	12.2028	17.1838	20.6526	-0.550858	-1.8389	-1.34507	-1.07979	_	D	D	D
AT1G05250	Chr1:1525601-1527234[-]	protein_coding_gene	#N/A	Peroxidase superfamily protein	41.842	27.6989	11.6199	16.1524	19.2009	-0.595123	-1.84835	-1.3732	-1.12378	_	D	D	D
AT1G05260	Chr1:1529767-1531439[+]	protein_coding_gene	RCI3, RCI3A	Peroxidase superfamily protein	32.0614	28.131	32.5295	18.261	20.3154	-0.188677	0.0209112	-0.812071	-0.658263	_	_	_	_
AT1G05270	Chr1:1531641-1534410[-]	protein_coding_gene	#N/A	TraB family protein	33.0511	29.1599	29.2977	31.3168	29.9155	-0.180712	-0.173911	-0.0777615	-0.143805	_	_	_	_
AT1G05280	Chr1:1535444-1537525[-]	protein_coding_gene	#N/A	Protein of unknown function (DUF604)	0.327905	0.804852	0.636585	0.218522	0.253651	1.29542	0.957054	-0.585477	-0.37042	U	_	_	_
AT1G05300	Chr1:1545106-1547849[-]	protein_coding_gene	ZIP5	zinc transporter 5 precursor	5.07553	4.03071	2.00124	5.95447	3.9459	-0.332524	-1.34266	0.230414	-0.363203	_	D	_	_
AT1G05310	Chr1:1550543-1552517[-]	protein_coding_gene	#N/A	Pectin lyase-like superfamily protein	3.33489	2.99602	3.21119	2.54266	1.41639	-0.154591	-0.054531	-0.391299	-1.23541	_	_	_	D
AT1G05320	Chr1:1553603-1557733[+]	protein_coding_gene	#N/A	FUNCTIONS IN: molecular_function unknown; INVOLVED IN: biological_process unknown; LOCATED IN: cellular_component unknown; EXPRESSED IN: fruit, egg cell; CONTAINS InterPro DOMAIN/s: Prefoldin (InterPro:IPR009053); BEST Arabidopsis thaliana protein match is: unknown protein (TAIR:AT2G32240.1); Has 267444 Blast hits to 119656 proteins in 3886 species: Archae - 3699; Bacteria - 62432; Metazoa - 1065…	8.12712	8.64119	11.5758	11.1599	10.6395	0.0884857	0.510295	0.457508	0.388614	_	_	_	_
AT1G05330	Chr1:1558170-1558583[+]	protein_coding_gene	#N/A	unknown protein; Has 6 Blast hits to 6 proteins in 2 species: Archae - 0; Bacteria - 0; Metazoa - 0; Fungi - 0; Plants - 6; Viruses - 0; Other Eukaryotes - 0 (source: NCBI BLink).	0.547974	0.241231	0.288771	0.476342	0.621554	-1.18366	-0.924158	-0.202106	0.181769	_	_	_	_
AT1G05340	Chr1:1558844-1559903[-]	protein_coding_gene	#N/A	unknown protein; FUNCTIONS IN: molecular_function unknown; INVOLVED IN: biological_process unknown; LOCATED IN: chloroplast; EXPRESSED IN: 14 plant structures; EXPRESSED DURING: 7 growth stages; BEST Arabidopsis thaliana protein match is: unknown protein (TAIR:AT2G32210.1); Has 189 Blast hits to 189 proteins in 27 species: Archae - 0; Bacteria - 0; Metazoa - 0; Fungi - 21; Plants - 168; Viruses -…	9.32416	21.9704	99.6934	18.572	35.8699	1.23651	3.41845	0.994083	1.94373	U	U	_	U
AT1G05350	Chr1:1560678-1564123[-]	protein_coding_gene	#N/A	NAD(P)-binding Rossmann-fold superfamily protein	19.5666	24.9595	26.7676	25.7596	26.2515	0.351196	0.452095	0.396717	0.424007	_	_	_	_
AT1G05360	Chr1:1564598-1567465[+]	protein_coding_gene	#N/A	BEST Arabidopsis thaliana protein match is: SNARE associated Golgi protein family (TAIR:AT4G14950.1); Has 332 Blast hits to 326 proteins in 115 species: Archae - 0; Bacteria - 11; Metazoa - 174; Fungi - 0; Plants - 74; Viruses - 0; Other Eukaryotes - 73 (source: NCBI BLink).	8.29466	9.20232	12.622	9.9984	12.7915	0.149815	0.605685	0.269514	0.62493	_	_	_	_
AT1G05370	Chr1:1569192-1572280[-]	protein_coding_gene	#N/A	Sec14p-like phosphatidylinositol transfer family protein	1.81215	1.106	1.31393	1.42947	1.00313	-0.712346	-0.463811	-0.34222	-0.853187	_	_	_	_
AT1G05380	Chr1:1576863-1582614[+]	protein_coding_gene	#N/A	Acyl-CoA N-acyltransferase with RING/FYVE/PHD-type zinc finger protein	12.4455	15.3073	15.5873	16.3461	12.4591	0.298595	0.324747	0.393322	0.00157566	_	_	_	_
AT1G05385	Chr1:1582671-1583718[-]	protein_coding_gene	LPA19, Psb27-H1	photosystem II 11 kDa protein-related	32.0098	20.9036	18.0844	17.2948	15.5874	-0.614762	-0.823768	-0.888175	-1.03813	_	_	_	D
AT1G05400	Chr1:1584073-1585421[+]	protein_coding_gene	#N/A	unknown protein; INVOLVED IN: biological_process unknown; LOCATED IN: cellular_component unknown; EXPRESSED IN: sperm cell; BEST Arabidopsis thaliana protein match is: unknown protein (TAIR:AT1G06810.1); Has 31 Blast hits to 31 proteins in 2 species: Archae - 0; Bacteria - 0; Metazoa - 0; Fungi - 0; Plants - 31; Viruses - 0; Other Eukaryotes - 0 (source: NCBI BLink).	1.14932	1.04977	0.744491	1.32607	1.31661	-0.130706	-0.626447	0.206375	0.196046	_	_	_	_
AT1G05410	Chr1:1585371-1587778[-]	protein_coding_gene	#N/A	Protein of unknown function (DUF1423)	13.152	12.2754	11.0305	12.2245	12.947	-0.0995121	-0.253784	-0.105507	-0.0226643	_	_	_	_
AT1G05420	Chr1:1590073-1590753[+]	protein_coding_gene	ATOFP12, OFP12	ovate family protein 12	2.04736	5.19728	3.79101	6.87793	6.61166	1.34399	0.888814	1.7482	1.69124	U	_	U	U
AT1G05430	Chr1:1594057-1595818[-]	protein_coding_gene	#N/A	unknown protein; Has 31 Blast hits to 31 proteins in 9 species: Archae - 0; Bacteria - 0; Metazoa - 0; Fungi - 0; Plants - 31; Viruses - 0; Other Eukaryotes - 0 (source: NCBI BLink).	40.1383	38.0067	40.9411	34.8485	35.1504	-0.0787257	0.0285703	-0.203883	-0.191438	_	_	_	_
AT1G05440	Chr1:1596007-1597848[-]	protein_coding_gene	#N/A	C-8 sterol isomerases	1.49018	2.10334	1.67068	1.66952	1.32596	0.497193	0.164948	0.163946	-0.168448	_	_	_	_
AT1G05450	Chr1:1599911-1601214[+]	protein_coding_gene	#N/A	Bifunctional inhibitor/lipid-transfer protein/seed storage 2S albumin superfamily protein	0.472737	0.445735	7.0981	0.349706	0.20954	-0.0848497	3.90829	-0.434885	-1.17377	_	U	_	D
AT1G05460	Chr1:1601148-1605027[-]	protein_coding_gene	SDE3	P-loop containing nucleoside triphosphate hydrolases superfamily protein	5.58433	4.95756	5.42051	4.31731	4.52073	-0.171754	-0.0429555	-0.371251	-0.304828	_	_	_	_
AT1G05470	Chr1:1607357-1611703[-]	protein_coding_gene	CVP2	DNAse I-like superfamily protein	5.25968	3.44279	2.9492	5.4033	4.51728	-0.611395	-0.834649	0.0388657	-0.21952	_	_	_	_
AT1G05490	Chr1:1618602-1623452[-]	protein_coding_gene	chr31	chromatin remodeling 31	0.215967	0.562315	1.31537	0.450498	0.317297	1.38053	2.60653	1.06068	0.555002	U	U	U	_
AT1G05500	Chr1:1624955-1629224[+]	protein_coding_gene	SYTE, ATSYTE, NTMC2TYPE2.1, NTMC2T2.1, SYT5	Calcium-dependent lipid-binding (CaLB domain) family protein	28.6623	30.5193	40.7908	27.5891	31.9563	0.0905675	0.509089	-0.055056	0.156946	_	_	_	_
AT1G05510	Chr1:1629446-1630863[+]	protein_coding_gene	#N/A	Protein of unknown function (DUF1264)	0	0.0279456	0.102677	0.12108	0.337165	11.4489	13.326	13.5638	15.0412	_	U	U	U
AT1G05520	Chr1:1630900-1635711[-]	protein_coding_gene	#N/A	Sec23/Sec24 protein transport family protein	24.5811	33.4851	34.7245	29.8755	23.5739	0.44597	0.498404	0.281413	-0.060359	_	_	_	_
AT1G05530	Chr1:1636496-1637863[-]	protein_coding_gene	UGT75B2, UGT2	UDP-glucosyl transferase 75B2	0.189282	0.219038	0.101958	0.326316	0.358114	0.210634	-0.892497	0.7857	0.919846	_	_	_	_
AT1G05540	Chr1:1639286-1640811[+]	protein_coding_gene	#N/A	Protein of unknown function (DUF295)	2.51524	1.57733	1.2593	1.77181	1.43316	-0.673208	-0.998068	-0.50547	-0.811492	_	_	_	_
AT1G05550	Chr1:1640959-1643917[-]	protein_coding_gene	#N/A	Protein of unknown function (DUF295)	0.104664	0.115371	0.0621484	0.169692	0.164994	0.140503	-0.751882	0.6971	0.656598	_	_	_	_
AT1G05560	Chr1:1645498-1647147[-]	protein_coding_gene	UGT1, UGT75B1	UDP-glucosyltransferase 75B1	164.588	116.437	157.053	73.4811	63.0066	-0.49931	-0.0676076	-1.16341	-1.38528	_	_	D	D
AT1G05562	Chr1:1645875-1647162[+]	other_RNA	#N/A	Potential natural antisense gene, locus overlaps with AT1G05560	6.72596	4.64622	4.20597	5.16254	3.92926	-0.533682	-0.6773	-0.381658	-0.775481	_	_	_	_
AT1G05570	Chr1:1647706-1659437[-]	protein_coding_gene	CALS1	callose synthase 1	9.84805	9.4679	5.56886	12.6289	9.37863	-0.0567936	-0.822455	0.358819	-0.0704608	_	_	_	_
AT1G05575	Chr1:1661691-1662187[-]	protein_coding_gene	#N/A	unknown protein; FUNCTIONS IN: molecular_function unknown; INVOLVED IN: anaerobic respiration; LOCATED IN: endomembrane system; EXPRESSED IN: 17 plant structures; EXPRESSED DURING: 9 growth stages; BEST Arabidopsis thaliana protein match is: unknown protein (TAIR:AT2G31945.1); Has 63 Blast hits to 63 proteins in 10 species: Archae - 0; Bacteria - 0; Metazoa - 0; Fungi - 0; Plants - 63; Viruses - …	9.99216	3.94149	7.21655	18.3421	15.558	-1.34205	-0.469487	0.87629	0.638788	D	_	_	_
AT1G05577	Chr1:1662370-1664398[-]	protein_coding_gene	#N/A	Domain of unknown function (DUF966)	0.0512185	0.0753274	0.034159	0.10148	0.0839009	0.55642	-0.584259	0.986319	0.711912	_	_	_	_
AT1G05590	Chr1:1669350-1671876[+]	protein_coding_gene	HEXO2, ATHEX3	beta-hexosaminidase 2	10.2904	9.85052	11.708	8.07268	5.1234	-0.0630272	0.186195	-0.350179	-1.00612	_	_	_	D
AT1G05600	Chr1:1671936-1673856[+]	protein_coding_gene	#N/A	Tetratricopeptide repeat (TPR)-like superfamily protein	5.4832	4.47287	4.7355	3.9775	3.17218	-0.293817	-0.211501	-0.463155	-0.789542	_	_	_	_
AT1G05610	Chr1:1673861-1675934[-]	protein_coding_gene	APS2	ADP-glucose pyrophosphorylase small subunit 2	0.270215	0.275154	0.266112	0.346091	0.394649	0.0261306	-0.0220734	0.357032	0.546445	_	_	_	_
AT1G05620	Chr1:1679158-1681710[+]	protein_coding_gene	URH2	uridine-ribohydrolase 2	20.9043	22.8987	34.9355	15.7666	15.9427	0.131466	0.740894	-0.406928	-0.390904	_	_	_	_
AT1G05630	Chr1:1682318-1687363[+]	protein_coding_gene	AT5PTASE13, 5PTASE13	Endonuclease/exonuclease/phosphatase family protein	4.38728	3.44928	3.24006	4.37409	3.09652	-0.347031	-0.437305	-0.00434387	-0.502678	_	_	_	_
AT1G05640	Chr1:1687436-1689501[-]	protein_coding_gene	#N/A	Ankyrin repeat family protein	1.21819	1.20499	0.998596	1.27847	0.63867	-0.0157179	-0.286764	0.0696786	-0.931586	_	_	_	_
AT1G05650	Chr1:1690264-1692126[-]	protein_coding_gene	#N/A	Pectin lyase-like superfamily protein	1.20068	0.431441	0.0663429	0.195107	0.214385	-1.4766	-4.17756	-2.62145	-2.48552	D	D	D	D
AT1G05660	Chr1:1694286-1696058[-]	protein_coding_gene	#N/A	Pectin lyase-like superfamily protein	1.05661	0.73974	0.297235	0.262354	0.327037	-0.514347	-1.82973	-2.00981	-1.69189	_	D	D	D
AT1G05670	Chr1:1697587-1701025[-]	protein_coding_gene	#N/A	Pentatricopeptide repeat (PPR-like) superfamily protein	2.0836	3.47031	2.71732	8.92594	6.95277	0.735983	0.383105	2.09892	1.7385	_	_	U	U
AT1G05675	Chr1:1701116-1702749[-]	protein_coding_gene	#N/A	UDP-Glycosyltransferase superfamily protein	2.59604	2.41917	3.57698	27.2355	19.5399	-0.1018	0.462428	3.3911	2.91203	_	_	U	U
AT1G05680	Chr1:1703092-1704691[-]	protein_coding_gene	UGT74E2	Uridine diphosphate glycosyltransferase 74E2	48.3999	41.4945	126.411	35.9335	40.1112	-0.222084	1.38505	-0.429674	-0.270999	_	U	_	_
AT1G05690	Chr1:1707011-1709347[+]	protein_coding_gene	BT3	BTB and TAZ domain protein 3	2.13027	1.54075	1.36638	2.81041	6.26239	-0.467401	-0.640674	0.399743	1.55567	_	_	_	U
AT1G05700	Chr1:1709796-1713245[+]	protein_coding_gene	#N/A	Leucine-rich repeat transmembrane protein kinase protein	2.23938	0.753661	0.101982	1.51494	2.26959	-1.5711	-4.45658	-0.563836	0.0193323	D	D	_	_
AT1G05710	Chr1:1714950-1717276[+]	protein_coding_gene	#N/A	basic helix-loop-helix (bHLH) DNA-binding superfamily protein	10.8385	8.89955	5.86046	16.2186	18.7603	-0.284361	-0.887078	0.581484	0.791517	_	_	_	_
AT1G05720	Chr1:1717447-1718909[-]	protein_coding_gene	#N/A	selenoprotein family protein	36.0679	41.8217	46.4449	31.6731	36.2358	0.213536	0.364805	-0.187457	0.00670032	_	_	_	_
AT1G05730	Chr1:1718555-1720303[+]	protein_coding_gene	#N/A	Eukaryotic protein of unknown function (DUF842)	2.2379	2.31267	1.65073	2.15291	2.39731	0.0474136	-0.439039	-0.0558573	0.0992705	_	_	_	_
AT1G05740	Chr1:1720674-1721309[+]	protein_coding_gene	#N/A	Eukaryotic protein of unknown function (DUF842)	0.127975	0.133762	0.0694637	0.188257	0.17571	0.0638014	-0.881436	0.556805	0.457304	_	_	_	_
AT1G05750	Chr1:1721509-1724734[+]	protein_coding_gene	PDE247, CLB19	Tetratricopeptide repeat (TPR)-like superfamily protein	2.48479	2.91009	2.63739	3.43919	3.12392	0.227939	0.0859867	0.468943	0.330232	_	_	_	_
AT1G05760	Chr1:1723734-1724486[-]	protein_coding_gene	RTM1	Mannose-binding lectin superfamily protein	7.59693	6.34496	6.74611	7.05605	10.7163	-0.259805	-0.17136	-0.106556	0.496318	_	_	_	_
AT1G05770	Chr1:1725388-1726283[-]	protein_coding_gene	#N/A	Mannose-binding lectin superfamily protein	1.15037	0.665434	0.818661	0.916981	1.30986	-0.789721	-0.490755	-0.327131	0.187313	_	_	_	_
AT1G05780	Chr1:1726608-1728404[+]	protein_coding_gene	#N/A	Vacuolar ATPase assembly integral membrane protein VMA21-like domain	11.581	12.1401	11.973	12.1034	11.0072	0.0680204	0.0480248	0.0636525	-0.0733122	_	_	_	_
AT1G05785	Chr1:1730249-1732626[+]	protein_coding_gene	#N/A	Got1/Sft2-like vescicle transport protein family	12.941	10.6446	9.89547	11.8507	16.3033	-0.281827	-0.387109	-0.126977	0.333215	_	_	_	_
AT1G05790	Chr1:1732871-1737489[+]	protein_coding_gene	#N/A	lipase class 3 family protein	10.4829	9.98033	11.594	12.2788	10.0164	-0.0708784	0.14534	0.228131	-0.0656737	_	_	_	_
AT1G05800	Chr1:1741204-1742619[+]	protein_coding_gene	DGL	alpha/beta-Hydrolases superfamily protein	0	0	0.0120259	0.183733	0.0736798	0	10.2331	14.1654	12.8472	_	_	U	U
AT1G05805	Chr1:1744773-1747693[+]	protein_coding_gene	#N/A	basic helix-loop-helix (bHLH) DNA-binding superfamily protein	18.4945	15.4249	15.6357	20.8335	16.3127	-0.261835	-0.242252	0.171809	-0.181101	_	_	_	_
AT1G05810	Chr1:1748314-1749460[+]	protein_coding_gene	ARA, ARA-1, ATRAB11D, ATRABA5E, RABA5E	RAB GTPase homolog A5E	18.4735	11.5238	11.0095	9.99853	11.9801	-0.68084	-0.746708	-0.885669	-0.624817	_	_	_	_
AT1G05820	Chr1:1749682-1753990[+]	protein_coding_gene	SPPL5, ATSPPL5	SIGNAL PEPTIDE PEPTIDASE-LIKE 5	1.67945	1.77887	1.42752	2.26444	2.36997	0.0829718	-0.234476	0.431163	0.496877	_	_	_	_
AT1G05830	Chr1:1754244-1761817[+]	protein_coding_gene	ATX2	trithorax-like protein 2	9.92341	11.4421	10.7069	15.7432	10.3086	0.205444	0.109633	0.66582	0.0549405	_	_	_	_
AT1G05835	Chr1:1762224-1762814[+]	protein_coding_gene	#N/A	PHD finger protein	32.498	23.862	25.176	22.4859	30.152	-0.445636	-0.368302	-0.53133	-0.108097	_	_	_	_
AT1G05840	Chr1:1762734-1766281[-]	protein_coding_gene	#N/A	Eukaryotic aspartyl protease family protein	16.6757	12.1851	11.2931	16.5638	16.1385	-0.452629	-0.562305	-0.00971363	-0.0472408	_	_	_	_
AT1G05850	Chr1:1766503-1768695[-]	protein_coding_gene	POM1, ERH2, ELP1, CTL1, ELP, HOT2, ATCTL1	Chitinase family protein	488.058	477.943	553.011	403.787	433.186	-0.030214	0.180256	-0.273458	-0.172066	_	_	_	_
AT1G05860	Chr1:1769014-1771115[+]	protein_coding_gene	#N/A	unknown protein; FUNCTIONS IN: molecular_function unknown; INVOLVED IN: biological_process unknown; LOCATED IN: chloroplast; EXPRESSED IN: 20 plant structures; EXPRESSED DURING: 11 growth stages; BEST Arabidopsis thaliana protein match is: unknown protein (TAIR:AT2G31600.1); Has 101 Blast hits to 100 proteins in 32 species: Archae - 0; Bacteria - 0; Metazoa - 28; Fungi - 2; Plants - 66; Viruses -…	10.6421	10.8314	9.32654	8.2764	8.35742	0.0254368	-0.190369	-0.362707	-0.348653	_	_	_	_
AT1G05870	Chr1:1771457-1773293[-]	protein_coding_gene	#N/A	Protein of unknown function (DUF1685)	24.7257	88.5402	54.338	39.7746	82.5993	1.84032	1.13595	0.685836	1.74012	U	U	_	U
AT1G05880	Chr1:1775643-1778553[+]	protein_coding_gene	ARI12	RING/U-box superfamily protein	0.281774	0.283068	0.468302	0.235328	0.193958	0.00660994	0.73288	-0.259855	-0.538771	_	_	_	_
AT1G05890	Chr1:1779256-1784529[+]	protein_coding_gene	ARI5	RING/U-box superfamily protein	31.2033	28.9752	32.0019	34.459	32.757	-0.10688	0.0364589	0.143182	0.0701046	_	_	_	_
AT1G05894	Chr1:1784803-1786292[+]	protein_coding_gene	#N/A	unknown protein; LOCATED IN: chloroplast; BEST Arabidopsis thaliana protein match is: unknown protein (TAIR:AT2G31480.1); Has 35333 Blast hits to 34131 proteins in 2444 species: Archae - 798; Bacteria - 22429; Metazoa - 974; Fungi - 991; Plants - 531; Viruses - 0; Other Eukaryotes - 9610 (source: NCBI BLink).	0.128307	0.237293	0.201688	0.788892	2.17565	0.887018	0.652484	2.62013	4.08367	_	_	U	U
AT1G05900	Chr1:1786856-1789676[+]	protein_coding_gene	ATNTH2, NTH2	endonuclease III 2	10.4751	9.12716	11.483	10.6262	9.2431	-0.198726	0.132535	0.0206617	-0.180515	_	_	_	_
AT1G05910	Chr1:1790224-1796647[+]	protein_coding_gene	#N/A	cell division cycle protein 48-related / CDC48-related	9.21177	10.4913	9.85506	11.156	10.0517	0.187643	0.0973862	0.276269	0.125889	_	_	_	_
AT1G05920	Chr1:1796778-1798254[+]	protein_coding_gene	#N/A	Domain of unknown function (DUF313)	0	0	0	0.0574037	0.172673	0	0	12.4872	14.0758	_	_	U	U
AT1G05940	Chr1:1801162-1803984[-]	protein_coding_gene	CAT9	cationic amino acid transporter 9	27.4351	28.1785	32.9549	28.8643	20.4188	0.038572	0.26447	0.0732634	-0.426125	_	_	_	_
AT1G05950	Chr1:1804401-1807471[-]	protein_coding_gene	#N/A	unknown protein; Has 50 Blast hits to 45 proteins in 14 species: Archae - 5; Bacteria - 0; Metazoa - 4; Fungi - 0; Plants - 34; Viruses - 0; Other Eukaryotes - 7 (source: NCBI BLink).	3.21147	3.68664	3.53362	3.67443	3.20906	0.199072	0.137913	0.194286	-0.00108305	_	_	_	_
AT1G05960	Chr1:1807973-1815474[-]	protein_coding_gene	#N/A	ARM repeat superfamily protein	14.0958	19.1956	20.9322	22.7221	21.3862	0.44551	0.570458	0.68883	0.601414	_	_	_	_
AT1G05970	Chr1:1816056-1817282[-]	protein_coding_gene	#N/A	RNA-binding (RRM/RBD/RNP motifs) family protein	9.49537	5.13576	4.53678	5.61665	8.00054	-0.886645	-1.06555	-0.757513	-0.247127	_	D	_	_
AT1G05990	Chr1:1818447-1819040[+]	protein_coding_gene	RHS1	EF hand calcium-binding protein family	0.662272	0.357715	0.338819	0.69425	0.816686	-0.888595	-0.966888	0.0680304	0.302354	_	_	_	_
AT1G06000	Chr1:1820308-1821894[-]	protein_coding_gene	#N/A	UDP-Glycosyltransferase superfamily protein	19.8091	34.984	34.1513	41.7955	101.304	0.820532	0.785777	1.07718	2.35446	_	_	U	U
AT1G06002	Chr1:1820977-1821918[+]	other_RNA	#N/A	Potential natural antisense gene, locus overlaps with AT1G06000	5.92829	3.85605	3.17462	9.03433	8.07501	-0.620491	-0.90103	0.607801	0.445847	_	_	_	_
AT1G06010	Chr1:1822618-1823997[+]	protein_coding_gene	#N/A	unknown protein; Has 25 Blast hits to 25 proteins in 9 species: Archae - 0; Bacteria - 0; Metazoa - 0; Fungi - 0; Plants - 25; Viruses - 0; Other Eukaryotes - 0 (source: NCBI BLink).	23.5885	20.6328	22.4006	16.4974	22.6953	-0.193144	-0.0745463	-0.515845	-0.0556901	_	_	_	_
AT1G06020	Chr1:1824548-1826101[+]	protein_coding_gene	#N/A	pfkB-like carbohydrate kinase family protein	0.209688	0.248597	0.312155	0.508551	1.10746	0.245554	0.573996	1.27811	2.40088	_	_	U	U
AT1G06030	Chr1:1826880-1828161[+]	protein_coding_gene	#N/A	pfkB-like carbohydrate kinase family protein	0.128071	0.169186	0.166507	0.216813	0.185307	0.401639	0.378613	0.759461	0.532939	_	_	_	_
AT1G06040	Chr1:1828413-1829890[-]	protein_coding_gene	STO	B-box zinc finger family protein	234.171	221.52	195.214	230.506	190.854	-0.0801255	-0.262506	-0.0227581	-0.295093	_	_	_	_
AT1G06050	Chr1:1830605-1832555[-]	protein_coding_gene	#N/A	Protein of unknown function (DUF1336)	6.53361	4.89597	6.17232	4.67961	3.90852	-0.416285	-0.0820674	-0.481491	-0.741256	_	_	_	_
AT1G06060	Chr1:1832943-1834861[+]	protein_coding_gene	#N/A	LisH and RanBPM domains containing protein	25.8072	23.5175	23.781	28.1037	24.4507	-0.134039	-0.117964	0.122986	-0.0778978	_	_	_	_
AT1G06070	Chr1:1834829-1837648[-]	protein_coding_gene	#N/A	Basic-leucine zipper (bZIP) transcription factor family protein	14.9521	14.9277	15.2945	12.0933	11.7698	-0.00235622	0.0326648	-0.30614	-0.345258	_	_	_	_
AT1G06080	Chr1:1843568-1846302[+]	protein_coding_gene	ADS1	delta 9 desaturase 1	55.9337	52.3103	86.6653	13.7575	9.7449	-0.0966227	0.631737	-2.0235	-2.521	_	_	D	D
AT1G06090	Chr1:1847883-1849693[+]	protein_coding_gene	#N/A	Fatty acid desaturase family protein	4.72942	4.31685	3.73625	2.75004	3.65872	-0.131684	-0.340071	-0.782208	-0.370323	_	_	_	_
AT1G06100	Chr1:1851530-1853019[+]	protein_coding_gene	#N/A	Fatty acid desaturase family protein	1.9864	1.72159	5.15085	1.37255	3.31373	-0.206413	1.37465	-0.533294	0.738297	_	U	_	_
AT1G06110	Chr1:1853077-1855031[-]	protein_coding_gene	SKIP16	SKP1/ASK-interacting protein 16	23.4571	23.274	29.8768	20.0274	25.5707	-0.0113055	0.349001	-0.228049	0.124467	_	_	_	_
AT1G06120	Chr1:1855943-1857718[+]	protein_coding_gene	#N/A	Fatty acid desaturase family protein	0.769848	0.620317	0.330993	0.308169	0.251284	-0.311563	-1.21775	-1.32082	-1.61522	_	D	D	D
AT1G06130	Chr1:1857767-1860730[-]	protein_coding_gene	GLX2-4	glyoxalase 2-4	26.4775	24.1012	24.8776	28.1394	26.914	-0.135662	-0.0899196	0.0878246	0.0235899	_	_	_	_
AT1G06135	Chr1:1862197-1862742[+]	protein_coding_gene	#N/A	unknown protein; FUNCTIONS IN: molecular_function unknown; INVOLVED IN: biological_process unknown; LOCATED IN: endomembrane system; BEST Arabidopsis thaliana protein match is: unknown protein (TAIR:AT2G31345.1); Has 35333 Blast hits to 34131 proteins in 2444 species: Archae - 798; Bacteria - 22429; Metazoa - 974; Fungi - 991; Plants - 531; Viruses - 0; Other Eukaryotes - 9610 (source: NCBI BLink…	0.0780497	0.0997883	0.101634	0.439398	0.433708	0.354437	0.380875	2.49291	2.47411	_	_	U	U
AT1G06140	Chr1:1864796-1866472[+]	protein_coding_gene	#N/A	Pentatricopeptide repeat (PPR) superfamily protein	0.883834	1.32101	1.49533	2.09197	1.71568	0.579789	0.75861	1.24301	0.956925	_	_	U	_
AT1G06148	Chr1:1874885-1877528[-]	protein_coding_gene	#N/A	Unknown gene	0.0884309	0.060038	0.0759124	0.118596	0.167949	-0.558598	-0.220188	0.423391	0.925323	_	_	_	_
AT1G06150	Chr1:1867015-1873718[-]	protein_coding_gene	#N/A	basic helix-loop-helix (bHLH) DNA-binding superfamily protein	10.6044	12.1722	10.1899	13.9754	11.3942	0.198927	-0.057523	0.398226	0.103637	_	_	_	_
AT1G06160	Chr1:1883004-1883934[+]	protein_coding_gene	ORA59	octadecanoid-responsive Arabidopsis AP2/ERF 59	17.5634	2.49718	3.29336	1.04841	1.33237	-2.8142	-2.41494	-4.06628	-3.7205	D	D	D	D
AT1G06170	Chr1:1884981-1886897[-]	protein_coding_gene	#N/A	basic helix-loop-helix (bHLH) DNA-binding superfamily protein	0.161497	0.201805	0.189027	0.191163	0.158869	0.321437	0.227072	0.243282	-0.0236682	_	_	_	_
AT1G06180	Chr1:1889408-1891158[+]	protein_coding_gene	ATMYB13, ATMYBLFGN, MYB13	myb domain protein 13	21.4895	22.7805	31.182	14.5841	30.1815	0.0841675	0.537081	-0.559235	0.490032	_	_	_	_
AT1G06190	Chr1:1892273-1894148[-]	protein_coding_gene	#N/A	Rho termination factor	85.3976	84.5438	80.0004	76.2654	73.6368	-0.0144966	-0.0941883	-0.163167	-0.213769	_	_	_	_
AT1G06200	Chr1:1894336-1896935[-]	protein_coding_gene	#N/A	Peptidase S24/S26A/S26B/S26C family protein	53.2087	51.6198	54.6293	47.5807	59.866	-0.0437376	0.0380128	-0.161286	0.170075	_	_	_	_
AT1G06210	Chr1:1897203-1899208[+]	protein_coding_gene	#N/A	ENTH/VHS/GAT family protein	20.6523	25.402	31.3263	25.8595	35.0704	0.298639	0.601072	0.324392	0.763951	_	_	_	_
AT1G06220	Chr1:1899964-1904873[+]	protein_coding_gene	MEE5, CLO, GFA1	Ribosomal protein S5/Elongation factor G/III/V family protein	30.6904	33.805	31.7879	32.7995	29.5418	0.139449	0.0506902	0.0958863	-0.0550297	_	_	_	_
AT1G06230	Chr1:1906963-1910848[+]	protein_coding_gene	GTE4	global transcription factor group E4	20.5801	20.6765	21.8144	25.3297	18.0302	0.006742	0.0840308	0.29958	-0.190834	_	_	_	_
AT1G06240	Chr1:1911122-1913205[+]	protein_coding_gene	#N/A	Protein of unknown function DUF455	13.6605	9.16477	7.2817	9.93616	8.52627	-0.575839	-0.907662	-0.45925	-0.680023	_	_	_	_
AT1G06250	Chr1:1913256-1914895[-]	protein_coding_gene	#N/A	alpha/beta-Hydrolases superfamily protein	0.0812118	0.113579	0.146068	0.144165	0.186573	0.483884	0.8468	0.827882	1.19988	_	_	_	U
AT1G06265	Chr1:1914943-1917661[-]	other_RNA	#N/A	other RNA	1.06905	1.60661	1.61478	1.72161	1.69024	0.587686	0.595004	0.687424	0.660894	_	_	_	_
AT1G06270	Chr1:1918088-1919760[-]	protein_coding_gene	#N/A	Pentatricopeptide repeat (PPR) superfamily protein	4.31686	5.72092	5.25542	4.10473	4.00039	0.406264	0.283823	-0.0726948	-0.109841	_	_	_	_
AT1G06290	Chr1:1922352-1926278[+]	protein_coding_gene	ACX3, ATACX3	acyl-CoA oxidase 3	42.6029	40.4509	42.7113	35.6076	29.2733	-0.0747798	0.00366617	-0.258766	-0.541366	_	_	_	_
AT1G06310	Chr1:1926791-1930258[+]	protein_coding_gene	ACX6	acyl-CoA oxidase 6	0.063464	0.090319	0.0683353	0.114153	0.101446	0.509023	0.106676	0.846857	0.676617	_	_	_	_
AT1G06320	Chr1:1930523-1931449[+]	protein_coding_gene	#N/A	unknown protein; Has 24 Blast hits to 24 proteins in 10 species: Archae - 0; Bacteria - 2; Metazoa - 0; Fungi - 0; Plants - 20; Viruses - 0; Other Eukaryotes - 2 (source: NCBI BLink).	0.391316	0.317641	0.332472	0.201583	0.155299	-0.300928	-0.235095	-0.956925	-1.33323	_	_	_	D
AT1G06330	Chr1:1931671-1932266[-]	protein_coding_gene	#N/A	Heavy metal transport/detoxification superfamily protein	0.76924	0.779025	0.513233	0.140635	0.26918	0.0182356	-0.58381	-2.45139	-1.51483	_	_	D	D
AT1G06340	Chr1:1933284-1934014[-]	protein_coding_gene	#N/A	Plant Tudor-like protein	0.0707406	0.18376	0.118146	0.107809	0.0918866	1.37709	0.739879	0.607797	0.377269	U	_	_	_
AT1G06350	Chr1:1935293-1936819[-]	protein_coding_gene	#N/A	Fatty acid desaturase family protein	4.70903	4.04236	3.67847	4.59826	7.30491	-0.220232	-0.356323	-0.0343418	0.633435	_	_	_	_
AT1G06360	Chr1:1938963-1940459[-]	protein_coding_gene	#N/A	Fatty acid desaturase family protein	25.2668	22.397	25.8959	20.7482	38.7282	-0.173937	0.0354807	-0.284257	0.616141	_	_	_	_
AT1G06370	Chr1:1942843-1944934[-]	pseudogene	#N/A	pseudogene, similar to putative glycolipid alpha-mannosyltransferase, blastp match of 41% identity and 9.6e-10 P-value to GP	3.60722	2.25372	2.42713	3.35298	1.91766	-0.678577	-0.571634	-0.105443	-0.911537	_	_	_	_
AT1G06380	Chr1:1945124-1946076[+]	protein_coding_gene	#N/A	Ribosomal protein L1p/L10e family	22.2702	25.4046	17.9527	20.9455	16.2566	0.189975	-0.310914	-0.0884741	-0.454089	_	_	_	_
AT1G06390	Chr1:1946788-1950860[+]	protein_coding_gene	GSK1, ATGSK1, ATSK22, SK22, BIL2, ATSK2-3	GSK3/SHAGGY-like protein kinase 1	50.3648	42.9475	36.8552	57.4571	58.3559	-0.229842	-0.450547	0.190069	0.212463	_	_	_	_
AT1G06400	Chr1:1950844-1952785[-]	protein_coding_gene	ARA2, ATRABA1A, ATRAB11E, ARA-2	Ras-related small GTP-binding family protein	77.7048	67.3846	86.1571	65.4968	66.0684	-0.205585	0.148966	-0.246579	-0.234043	_	_	_	_
AT1G06410	Chr1:1954850-1958756[+]	protein_coding_gene	ATTPS7, TPS7, ATTPSA	trehalose-phosphatase/synthase 7	50.9808	63.723	79.9443	78.4492	46.1321	0.32186	0.649041	0.621805	-0.144183	_	_	_	_
AT1G06420	Chr1:1958923-1959947[+]	protein_coding_gene	#N/A	unknown protein; FUNCTIONS IN: molecular_function unknown; INVOLVED IN: biological_process unknown; LOCATED IN: cellular_component unknown; EXPRESSED IN: 14 plant structures; EXPRESSED DURING: 6 growth stages.	0.806303	0.929584	1.20275	1.10957	0.898508	0.205261	0.576937	0.460602	0.156207	_	_	_	_
AT1G06430	Chr1:1960058-1963011[-]	protein_coding_gene	FTSH8	FTSH protease 8	55.4614	45.4445	66.096	51.6166	68.3825	-0.287378	0.253079	-0.103649	0.302143	_	_	_	_
AT1G06440	Chr1:1963380-1965051[-]	protein_coding_gene	#N/A	Ubiquitin carboxyl-terminal hydrolase family protein	1.87188	2.79015	3.44427	3.29783	2.63208	0.575852	0.879707	0.817026	0.491713	_	_	_	_
AT1G06450	Chr1:1965840-1967219[+]	protein_coding_gene	#N/A	Polynucleotidyl transferase, ribonuclease H-like superfamily protein	4.54755	5.13562	4.12228	4.02524	2.59819	0.175449	-0.141647	-0.176014	-0.80758	_	_	_	_
AT1G06460	Chr1:1967087-1969561[-]	protein_coding_gene	ACD32.1, ACD31.2	alpha-crystallin domain 32.1	21.8521	31.8099	102.868	42.0208	75.7221	0.541704	2.23495	0.943331	1.79294	_	U	_	U
AT1G06470	Chr1:1969729-1973767[+]	protein_coding_gene	#N/A	Nucleotide/sugar transporter family protein	13.8253	15.0671	18.2412	18.3092	20.6163	0.124091	0.39989	0.405258	0.576474	_	_	_	_
AT1G06475	Chr1:1973834-1974386[-]	protein_coding_gene	#N/A	unknown protein; Has 35333 Blast hits to 34131 proteins in 2444 species: Archae - 798; Bacteria - 22429; Metazoa - 974; Fungi - 991; Plants - 531; Viruses - 0; Other Eukaryotes - 9610 (source: NCBI BLink).	6.65258	7.94338	8.77871	3.93644	4.47378	0.255839	0.400094	-0.757021	-0.572419	_	_	_	_
AT1G06490	Chr1:1978762-1989409[+]	protein_coding_gene	ATGSL07, gsl07, atgsl7, GSL7	glucan synthase-like 7	0.902031	1.15083	1.04704	1.51683	1.20987	0.351422	0.215065	0.749804	0.423599	_	_	_	_
AT1G06500	Chr1:1989479-1990730[+]	protein_coding_gene	#N/A	unknown protein; FUNCTIONS IN: molecular_function unknown; INVOLVED IN: biological_process unknown; LOCATED IN: cellular_component unknown; EXPRESSED IN: 22 plant structures; EXPRESSED DURING: 13 growth stages; Has 25 Blast hits to 25 proteins in 10 species: Archae - 0; Bacteria - 0; Metazoa - 0; Fungi - 0; Plants - 25; Viruses - 0; Other Eukaryotes - 0 (source: NCBI BLink).	19.4568	15.2551	16.5653	14.2809	14.2333	-0.350983	-0.23211	-0.446187	-0.451004	_	_	_	_
AT1G06510	Chr1:1992333-1993840[+]	protein_coding_gene	#N/A	unknown protein; FUNCTIONS IN: molecular_function unknown; INVOLVED IN: biological_process unknown; LOCATED IN: chloroplast; EXPRESSED IN: 21 plant structures; EXPRESSED DURING: 13 growth stages; Has 376 Blast hits to 369 proteins in 152 species: Archae - 5; Bacteria - 113; Metazoa - 105; Fungi - 46; Plants - 27; Viruses - 2; Other Eukaryotes - 78 (source: NCBI BLink).	28.4202	24.2356	21.2393	22.0175	20.4379	-0.229789	-0.42018	-0.368266	-0.47567	_	_	_	_
AT1G06515	Chr1:1990634-1992228[-]	protein_coding_gene	#N/A	Protein of unknown function (DUF3317)	61.3037	53.2938	50.2446	47.9397	45.6473	-0.202006	-0.287006	-0.354753	-0.425445	_	_	_	_
AT1G06520	Chr1:1993978-1996112[-]	protein_coding_gene	ATGPAT1, GPAT1	glycerol-3-phosphate acyltransferase 1	3.72107	1.23641	2.12317	2.62122	2.151	-1.58955	-0.809495	-0.505477	-0.790707	D	_	_	_
AT1G06530	Chr1:2001594-2002596[+]	protein_coding_gene	#N/A	Tropomyosin-related	61.9332	63.7117	60.5705	62.4399	53.5027	0.0408453	-0.0320977	0.0117552	-0.211101	_	_	_	_
AT1G06540	Chr1:2002877-2003393[-]	protein_coding_gene	#N/A	unknown protein; BEST Arabidopsis thaliana protein match is: unknown protein (TAIR:AT2G30930.1); Has 16 Blast hits to 16 proteins in 3 species: Archae - 0; Bacteria - 0; Metazoa - 0; Fungi - 0; Plants - 16; Viruses - 0; Other Eukaryotes - 0 (source: NCBI BLink).	0.228861	0.539388	0.649755	1.12934	3.74425	1.23682	1.50538	2.30289	4.03207	U	U	U	U
AT1G06550	Chr1:2003627-2007190[-]	protein_coding_gene	#N/A	ATP-dependent caseinolytic (Clp) protease/crotonase family protein	22.7277	24.7483	30.4412	24.9225	25.2758	0.122878	0.421573	0.132997	0.153305	_	_	_	_
AT1G06560	Chr1:2007615-2012006[+]	protein_coding_gene	#N/A	NOL1/NOP2/sun family protein	13.5037	13.0793	8.91305	13.8013	10.6237	-0.0460694	-0.599363	0.0314494	-0.346068	_	_	_	_
AT1G06570	Chr1:2011885-2013545[-]	protein_coding_gene	PDS1, HPD	phytoene desaturation 1	89.8912	88.8559	97.41	76.2216	82.069	-0.0167123	0.11589	-0.23798	-0.131342	_	_	_	_
AT1G06580	Chr1:2014003-2016054[-]	protein_coding_gene	#N/A	Pentatricopeptide repeat (PPR) superfamily protein	1.80543	1.50349	1.60965	1.5904	0.838288	-0.264026	-0.165594	-0.182952	-1.10682	_	_	_	D
AT1G06590	Chr1:2016308-2024662[-]	protein_coding_gene	#N/A	unknown protein; Has 380 Blast hits to 268 proteins in 109 species: Archae - 0; Bacteria - 0; Metazoa - 245; Fungi - 73; Plants - 49; Viruses - 0; Other Eukaryotes - 13 (source: NCBI BLink).	3.53808	3.65656	3.49132	4.33541	4.26287	0.0475202	-0.019194	0.293201	0.268858	_	_	_	_
AT1G06620	Chr1:2025601-2027271[+]	protein_coding_gene	#N/A	2-oxoglutarate (2OG) and Fe(II)-dependent oxygenase superfamily protein	14.051	12.6887	8.36634	28.4326	26.3634	-0.147128	-0.748004	1.01687	0.907863	_	_	U	_
AT1G06630	Chr1:2027739-2031388[+]	protein_coding_gene	#N/A	F-box/RNI-like superfamily protein	15.034	11.6543	10.4048	13.6892	10.8044	-0.367366	-0.530979	-0.135191	-0.47661	_	_	_	_
AT1G06640	Chr1:2032338-2034018[+]	protein_coding_gene	#N/A	2-oxoglutarate (2OG) and Fe(II)-dependent oxygenase superfamily protein	73.8893	65.0777	57.8208	79.6936	93.5982	-0.183202	-0.353777	0.109098	0.341115	_	_	_	_
AT1G06645	Chr1:2034156-2035626[+]	protein_coding_gene	#N/A	2-oxoglutarate (2OG) and Fe(II)-dependent oxygenase superfamily protein	12.1997	3.74976	3.25814	6.31028	13.4788	-1.70197	-1.90472	-0.951069	0.143846	D	D	_	_
AT1G06650	Chr1:2035839-2037366[+]	protein_coding_gene	#N/A	2-oxoglutarate (2OG) and Fe(II)-dependent oxygenase superfamily protein	52.5757	40.7182	44.598	43.7018	45.7814	-0.368722	-0.237417	-0.266703	-0.199635	_	_	_	_
AT1G06660	Chr1:2037311-2040246[-]	protein_coding_gene	#N/A	unknown protein; BEST Arabidopsis thaliana protein match is: unknown protein (TAIR:AT2G30820.2); Has 166 Blast hits to 144 proteins in 35 species: Archae - 0; Bacteria - 17; Metazoa - 13; Fungi - 20; Plants - 104; Viruses - 0; Other Eukaryotes - 12 (source: NCBI BLink).	1.78428	2.14752	2.31889	2.32845	2.05346	0.267328	0.37809	0.384026	0.202714	_	_	_	_
AT1G06670	Chr1:2040433-2047612[+]	protein_coding_gene	NIH	nuclear DEIH-boxhelicase	12.3982	14.6709	12.6121	14.231	11.9735	0.242827	0.0246778	0.198906	-0.0502857	_	_	_	_
AT1G06680	Chr1:2047825-2049418[+]	protein_coding_gene	PSBP-1, OEE2, PSII-P	photosystem II subunit P-1	2622.5	1754.01	1343.27	1428.3	1417.83	-0.580286	-0.965193	-0.876644	-0.887258	_	_	_	_
AT1G06690	Chr1:2049602-2052154[-]	protein_coding_gene	#N/A	NAD(P)-linked oxidoreductase superfamily protein	19.9473	17.9853	19.8095	19.3592	20.3493	-0.149375	-0.010001	-0.0431741	0.0287857	_	_	_	_
AT1G06700	Chr1:2052481-2055548[-]	protein_coding_gene	#N/A	Protein kinase superfamily protein	57.9388	51.7309	59.9841	53.5098	55.8449	-0.163503	0.0500503	-0.114727	-0.0531043	_	_	_	_
AT1G06710	Chr1:2056575-2060242[-]	protein_coding_gene	#N/A	Tetratricopeptide repeat (TPR)-like superfamily protein	2.99284	3.87286	3.31483	4.84205	2.85276	0.371883	0.147419	0.694101	-0.0691565	_	_	_	_
AT1G06720	Chr1:2060444-2067323[-]	protein_coding_gene	#N/A	P-loop containing nucleoside triphosphate hydrolases superfamily protein	15.402	15.9929	12.5697	19.6129	14.9656	0.0543138	-0.293167	0.348685	-0.0414676	_	_	_	_
AT1G06730	Chr1:2067529-2070446[+]	protein_coding_gene	#N/A	pfkB-like carbohydrate kinase family protein	12.1728	10.3393	10.0816	10.37	8.97299	-0.235522	-0.271936	-0.231245	-0.44	_	_	_	_
AT1G06740	Chr1:2070737-2073535[+]	transposable_element_gene	#N/A	transposable element gene	2.66516	2.60031	2.49358	2.51947	2.06494	-0.0355362	-0.0959988	-0.0810977	-0.368122	_	_	_	_
AT1G06750	Chr1:2072979-2076505[+]	protein_coding_gene	#N/A	P-loop containing nucleoside triphosphate hydrolases superfamily protein	0.0295543	0.0799144	0.0635183	0.262219	0.703041	1.43478	1.10354	3.1489	4.5717	U	_	U	U
AT1G06760	Chr1:2076504-2077698[-]	protein_coding_gene	#N/A	winged-helix DNA-binding transcription factor family protein	114.037	120.986	151.885	92.0977	53.1141	0.0853381	0.413477	-0.308265	-1.10234	_	_	_	D
AT1G06770	Chr1:2078911-2081939[-]	protein_coding_gene	DRIP1	DREB2A-interacting protein 1	4.97605	4.15955	3.62314	4.71947	4.42184	-0.258573	-0.457759	-0.076376	-0.170354	_	_	_	_
AT1G06780	Chr1:2083311-2087131[+]	protein_coding_gene	GAUT6	galacturonosyltransferase 6	7.3722	13.4728	16.214	9.01099	8.39136	0.869882	1.13707	0.28959	0.186809	_	U	_	_
AT1G06790	Chr1:2087232-2089786[+]	protein_coding_gene	#N/A	RNA polymerase Rpb7 N-terminal domain-containing protein	18.4594	17.6603	12.7341	13.8415	16.7082	-0.0638458	-0.535658	-0.415355	-0.143799	_	_	_	_
AT1G06800	Chr1:2089417-2091686[-]	protein_coding_gene	PLA-I{gamma}1	alpha/beta-Hydrolases superfamily protein	7.71445	8.08678	10.5121	9.01873	9.11621	0.068002	0.446415	0.225361	0.240871	_	_	_	_
AT1G06810	Chr1:2091738-2092528[-]	protein_coding_gene	#N/A	unknown protein; BEST Arabidopsis thaliana protein match is: unknown protein (TAIR:AT1G05400.2); Has 30201 Blast hits to 17322 proteins in 780 species: Archae - 12; Bacteria - 1396; Metazoa - 17338; Fungi - 3422; Plants - 5037; Viruses - 0; Other Eukaryotes - 2996 (source: NCBI BLink).	0.0393884	0.0425585	0.0247859	0.106622	0.433764	0.111649	-0.668035	1.43643	3.46073	_	_	_	U
AT1G06820	Chr1:2092946-2096232[-]	protein_coding_gene	CRTISO, CCR2	carotenoid isomerase	25.9325	25.4695	27.1757	24.8594	20.2078	-0.0259906	0.0675559	-0.0609698	-0.359849	_	_	_	_
AT1G06830	Chr1:2097151-2097655[+]	protein_coding_gene	#N/A	Glutaredoxin family protein	13.2379	5.25618	0.560312	10.112	9.70856	-1.33259	-4.56228	-0.388606	-0.447345	D	D	_	_
AT1G06840	Chr1:2097747-2103479[-]	protein_coding_gene	#N/A	Leucine-rich repeat protein kinase family protein	12.2782	10.1982	8.59193	15.5155	13.8102	-0.267784	-0.515044	0.337611	0.169635	_	_	_	_
AT1G06850	Chr1:2105048-2106749[+]	protein_coding_gene	AtbZIP52, bZIP52	basic leucine-zipper 52	12.7037	7.77812	6.97527	6.91912	5.29256	-0.707755	-0.864927	-0.876587	-1.26321	_	_	_	D
AT1G06870	Chr1:2108593-2110986[+]	protein_coding_gene	#N/A	Peptidase S24/S26A/S26B/S26C family protein	15.862	16.1262	18.2965	13.0671	15.4251	0.0238318	0.205993	-0.279635	-0.0402948	_	_	_	_
AT1G06890	Chr1:2111363-2114601[-]	protein_coding_gene	#N/A	nodulin MtN21 /EamA-like transporter family protein	57.6529	67.9942	74.6637	62.5703	69.4299	0.238018	0.373014	0.118085	0.268164	_	_	_	_
AT1G06900	Chr1:2114927-2120745[-]	protein_coding_gene	#N/A	Insulinase (Peptidase family M16) family protein	19.2283	20.5806	17.8293	21.1119	16.5788	0.0980538	-0.108981	0.134825	-0.213892	_	_	_	_
AT1G06910	Chr1:2120991-2123748[+]	protein_coding_gene	TRFL7	TRF-like 7	3.40897	3.71287	3.30477	3.76714	3.30221	0.123199	-0.0447859	0.144133	-0.0459039	_	_	_	_
AT1G06923	Chr1:2126749-2128060[+]	protein_coding_gene	#N/A	BEST Arabidopsis thaliana protein match is: ovate family protein 17 (TAIR:AT2G30395.1); Has 35333 Blast hits to 34131 proteins in 2444 species: Archae - 798; Bacteria - 22429; Metazoa - 974; Fungi - 991; Plants - 531; Viruses - 0; Other Eukaryotes - 9610 (source: NCBI BLink).	0.838055	0.424731	0.515291	0.322937	0.503783	-0.980479	-0.701647	-1.37576	-0.734231	_	_	D	_
AT1G06925	Chr1:2127704-2128611[-]	protein_coding_gene	#N/A	FUNCTIONS IN: molecular_function unknown; INVOLVED IN: biological_process unknown; LOCATED IN: endomembrane system; BEST Arabidopsis thaliana protein match is: Putative endonuclease or glycosyl hydrolase (TAIR:AT4G20480.1); Has 152 Blast hits to 136 proteins in 9 species: Archae - 0; Bacteria - 0; Metazoa - 0; Fungi - 0; Plants - 152; Viruses - 0; Other Eukaryotes - 0 (source: NCBI BLink).	0.127644	0.213399	0.116466	0.117373	0.175058	0.741382	-0.132206	-0.121015	0.455677	_	_	_	_
AT1G06930	Chr1:2128843-2129883[+]	protein_coding_gene	#N/A	unknown protein; Has 4478 Blast hits to 355 proteins in 82 species: Archae - 0; Bacteria - 29; Metazoa - 379; Fungi - 125; Plants - 120; Viruses - 25; Other Eukaryotes - 3800 (source: NCBI BLink).	0.509678	0.720633	0.26677	0.281391	0.262685	0.49967	-0.933964	-0.856987	-0.956226	_	_	_	_
AT1G06950	Chr1:2130142-2135665[-]	protein_coding_gene	ATTIC110, TIC110	translocon at the inner envelope membrane of chloroplasts 110	110.022	120.822	108.687	119.493	88.272	0.135091	-0.0176126	0.119134	-0.317764	_	_	_	_
AT1G06960	Chr1:2135851-2137732[+]	protein_coding_gene	#N/A	RNA-binding (RRM/RBD/RNP motifs) family protein	11.4248	11.6002	12.5142	10.9254	12.5479	0.0219808	0.131397	-0.0644828	0.135277	_	_	_	_
AT1G06970	Chr1:2138109-2140818[+]	protein_coding_gene	CHX14, ATCHX14	cation/hydrogen exchanger 14	0.0291567	0.108746	0.0764112	0.318611	0.647454	1.8987	1.38965	3.44945	4.47241	U	U	U	U
AT1G06980	Chr1:2143031-2143821[-]	protein_coding_gene	#N/A	unknown protein; FUNCTIONS IN: molecular_function unknown; INVOLVED IN: biological_process unknown; LOCATED IN: endomembrane system; EXPRESSED IN: sepal, male gametophyte, carpel; EXPRESSED DURING: 4 anthesis; BEST Arabidopsis thaliana protein match is: unknown protein (TAIR:AT2G30230.1); Has 159 Blast hits to 159 proteins in 13 species: Archae - 0; Bacteria - 0; Metazoa - 0; Fungi - 0; Plants - …	1.66082	2.02965	2.8654	2.9567	1.96553	0.289334	0.786837	0.832088	0.243021	_	_	_	_
AT1G07000	Chr1:2150194-2152325[-]	protein_coding_gene	ATEXO70B2, EXO70B2	exocyst subunit exo70 family protein B2	8.50947	10.6058	8.7351	17.6982	12.2116	0.317712	0.0377549	1.05646	0.521111	_	_	U	_
AT1G07010	Chr1:2152852-2155269[+]	protein_coding_gene	#N/A	Calcineurin-like metallo-phosphoesterase superfamily protein	36.5414	29.1249	19.4243	32.4618	26.3266	-0.327279	-0.911669	-0.170789	-0.473011	_	_	_	_
AT1G07020	Chr1:2155213-2156008[-]	protein_coding_gene	#N/A	unknown protein; Has 39 Blast hits to 39 proteins in 17 species: Archae - 0; Bacteria - 0; Metazoa - 6; Fungi - 3; Plants - 28; Viruses - 0; Other Eukaryotes - 2 (source: NCBI BLink).	30.4023	23.0807	22.1414	24.6457	30.9925	-0.397493	-0.457434	-0.302844	0.0277387	_	_	_	_
AT1G07025	Chr1:2157658-2158158[-]	protein_coding_gene	#N/A	Mitochondrial substrate carrier family protein	0	0	0	0	0.129478	0	0	0	13.6605	_	_	_	U
AT1G07030	Chr1:2158420-2160809[-]	protein_coding_gene	#N/A	Mitochondrial substrate carrier family protein	21.54	21.0661	20.0097	17.0026	21.6459	-0.032095	-0.106319	-0.341263	0.00707553	_	_	_	_
AT1G07040	Chr1:2160938-2163308[-]	protein_coding_gene	#N/A	unknown protein; INVOLVED IN: biological_process unknown; LOCATED IN: chloroplast; EXPRESSED IN: 24 plant structures; EXPRESSED DURING: 14 growth stages; BEST Arabidopsis thaliana protein match is: unknown protein (TAIR:AT1G27030.1); Has 540 Blast hits to 538 proteins in 187 species: Archae - 0; Bacteria - 333; Metazoa - 0; Fungi - 0; Plants - 67; Viruses - 0; Other Eukaryotes - 140 (source: NCBI…	21.2441	27.8206	71.3389	25.1287	25.0847	0.389091	1.74763	0.242274	0.239745	_	U	_	_
AT1G07050	Chr1:2164188-2165239[-]	protein_coding_gene	#N/A	CCT motif family protein	0.289551	0.446507	1.51255	2.12575	10.724	0.624848	2.38505	2.87604	5.21083	_	U	U	U
AT1G07060	Chr1:2167107-2168397[-]	protein_coding_gene	#N/A	unknown protein; Has 30 Blast hits to 30 proteins in 10 species: Archae - 0; Bacteria - 0; Metazoa - 0; Fungi - 0; Plants - 30; Viruses - 0; Other Eukaryotes - 0 (source: NCBI BLink).	0.127559	0.131453	0.10545	0.117355	0.133545	0.043379	-0.274582	-0.120276	0.0661562	_	_	_	_
AT1G07070	Chr1:2168564-2169851[+]	protein_coding_gene	#N/A	Ribosomal protein L35Ae family protein	75.2707	73.085	45.5583	48.1164	55.1149	-0.042513	-0.724374	-0.64556	-0.449646	_	_	_	_
AT1G07080	Chr1:2169982-2172194[+]	protein_coding_gene	#N/A	Thioredoxin superfamily protein	92.8411	104.463	169.361	82.1779	88.528	0.170157	0.867266	-0.176013	-0.0686298	_	_	_	_
AT1G07090	Chr1:2173952-2174894[-]	protein_coding_gene	LSH6	Protein of unknown function (DUF640)	21.3724	13.9679	5.02583	14.7719	8.374	-0.613633	-2.08831	-0.532893	-1.35176	_	D	_	D
AT1G07110	Chr1:2178104-2184148[-]	protein_coding_gene	F2KP, ATF2KP, FKFBP	fructose-2,6-bisphosphatase	31.5746	31.1806	33.2542	39.9787	32.4906	-0.0181158	0.0747721	0.340467	0.0412579	_	_	_	_
AT1G07119	Chr1:2184347-2186539[+]	other_RNA	#N/A	other RNA	3.2088	3.21443	2.42935	2.90822	3.14696	0.00252905	-0.401462	-0.141897	-0.0280749	_	_	_	_
AT1G07120	Chr1:2184759-2186580[-]	protein_coding_gene	#N/A	FUNCTIONS IN: molecular_function unknown; INVOLVED IN: biological_process unknown; LOCATED IN: chloroplast envelope; EXPRESSED IN: inflorescence meristem, petal, leaf whorl, flower; EXPRESSED DURING: 4 anthesis, petal differentiation and expansion stage; BEST Arabidopsis thaliana protein match is: Tetratricopeptide repeat (TPR)-like superfamily protein (TAIR:AT4G18570.1); Has 288 Blast hits to 26…	0.317551	0.431479	0.346704	0.564335	0.368951	0.44229	0.126712	0.829544	0.216435	_	_	_	_
AT1G07128	Chr1:2187621-2188417[-]	other_RNA	#N/A	Potential natural antisense gene, locus overlaps with AT1G07130	5.56897	3.44483	4.49992	6.26601	6.38098	-0.692976	-0.307511	0.170136	0.196367	_	_	_	_
AT1G07130	Chr1:2187776-2188733[+]	protein_coding_gene	STN1, ATSTN1	Nucleic acid-binding, OB-fold-like protein	4.48222	4.11071	3.92447	4.84266	4.14868	-0.124826	-0.191715	0.111586	-0.111561	_	_	_	_
AT1G07135	Chr1:2189928-2190659[-]	protein_coding_gene	#N/A	glycine-rich protein	40.8976	13.4143	20.1342	53.0433	79.7702	-1.60824	-1.02237	0.375154	0.963834	D	D	_	_
AT1G07140	Chr1:2191723-2193793[-]	protein_coding_gene	SIRANBP	Pleckstrin homology (PH) domain superfamily protein	173.055	183.146	182.55	165.644	157.684	0.0817636	0.077061	-0.0631447	-0.134194	_	_	_	_
AT1G07150	Chr1:2193941-2195798[-]	protein_coding_gene	MAPKKK13	mitogen-activated protein kinase kinase kinase 13	6.07899	4.43259	3.88732	12.6265	15.5796	-0.455681	-0.645054	1.05455	1.35775	_	_	U	U
AT1G07160	Chr1:2197908-2199748[-]	protein_coding_gene	#N/A	Protein phosphatase 2C family protein	0.350716	0.965919	0.423251	5.90668	5.46825	1.46157	0.271203	4.07393	3.96267	U	_	U	U
AT1G07170	Chr1:2200123-2201265[+]	protein_coding_gene	#N/A	PHF5-like protein	43.1507	31.321	26.4392	27.2676	34.1229	-0.462254	-0.706705	-0.662196	-0.338644	_	_	_	_
AT1G07175	Chr1:2202330-2202774[+]	protein_coding_gene	#N/A	unknown protein; FUNCTIONS IN: molecular_function unknown; INVOLVED IN: biological_process unknown; LOCATED IN: endomembrane system; BEST Arabidopsis thaliana protein match is: unknown protein (TAIR:AT2G29995.1); Has 30201 Blast hits to 17322 proteins in 780 species: Archae - 12; Bacteria - 1396; Metazoa - 17338; Fungi - 3422; Plants - 5037; Viruses - 0; Other Eukaryotes - 2996 (source: NCBI BLin…	1.60045	2.89353	1.78716	0.815413	0.786808	0.854349	0.15919	-0.972866	-1.02438	_	_	_	_
AT1G07180	Chr1:2204320-2206934[+]	protein_coding_gene	ATNDI1, NDA1	alternative NAD(P)H dehydrogenase 1	35.0323	26.7429	19.0686	23.6218	21.2961	-0.38953	-0.877486	-0.568567	-0.718096	_	_	_	_
AT1G07200	Chr1:2208719-2212546[-]	protein_coding_gene	#N/A	Double Clp-N motif-containing P-loop nucleoside triphosphate hydrolases superfamily protein	9.70819	8.52645	7.75152	10.6319	10.7506	-0.187257	-0.324723	0.131125	0.147143	_	_	_	_
AT1G07210	Chr1:2215223-2216982[+]	protein_coding_gene	#N/A	Ribosomal protein S18	52.4308	53.4853	47.0304	46.2577	46.061	0.0287279	-0.156821	-0.180721	-0.186869	_	_	_	_
AT1G07220	Chr1:2216925-2219474[-]	protein_coding_gene	#N/A	Arabidopsis thaliana protein of unknown function (DUF821)	8.25838	8.40667	7.3519	12.8573	10.0749	0.0256756	-0.167741	0.638656	0.286834	_	_	_	_
AT1G07230	Chr1:2220253-2222982[-]	protein_coding_gene	NPC1	non-specific phospholipase C1	17.7821	15.2268	16.8011	17.0371	17.8014	-0.223813	-0.08187	-0.0617459	0.001565	_	_	_	_
AT1G07240	Chr1:2223691-2225452[+]	protein_coding_gene	UGT71C5	UDP-glucosyl transferase 71C5	15.8125	11.7334	7.23678	22.3446	16.7834	-0.430444	-1.12764	0.49886	0.0859695	_	D	_	_
AT1G07250	Chr1:2225900-2227566[+]	protein_coding_gene	UGT71C4	UDP-glucosyl transferase 71C4	20.1654	22.8602	27.9319	19.8599	17.4821	0.180956	0.470031	-0.0220237	-0.206003	_	_	_	_
AT1G07260	Chr1:2227594-2229319[-]	protein_coding_gene	UGT71C3	UDP-glucosyl transferase 71C3	5.40701	4.15001	3.8947	4.26586	3.4165	-0.381715	-0.473318	-0.341994	-0.66231	_	_	_	_
AT1G07270	Chr1:2229757-2232897[-]	protein_coding_gene	#N/A	Cell division control, Cdc6	0.690413	1.33737	1.3323	0.886101	0.77024	0.953857	0.948377	0.360007	0.157846	_	_	_	_
AT1G07280	Chr1:2238087-2241217[+]	protein_coding_gene	#N/A	Tetratricopeptide repeat (TPR)-like superfamily protein	36.8303	24.4067	45.947	27.1183	40.2085	-0.593616	0.319077	-0.441626	0.126607	_	_	_	_
AT1G07290	Chr1:2242256-2244428[-]	protein_coding_gene	GONST2	golgi nucleotide sugar transporter 2	0.839977	1.82051	1.81428	1.93113	1.61489	1.11591	1.11097	1.20101	0.943006	U	U	U	_
AT1G07300	Chr1:2245758-2246492[-]	protein_coding_gene	#N/A	josephin protein-related	5.50681	6.69831	6.53139	12.1639	9.47288	0.28258	0.246173	1.14332	0.782585	_	_	U	_
AT1G07310	Chr1:2247509-2248961[-]	protein_coding_gene	#N/A	Calcium-dependent lipid-binding (CaLB domain) family protein	31.4643	33.8197	39.0947	36.4881	24.3937	0.104148	0.313257	0.21371	-0.367207	_	_	_	_
AT1G07320	Chr1:2249133-2250529[+]	protein_coding_gene	RPL4	ribosomal protein L4	380.24	307.96	271.956	290.386	270.353	-0.304167	-0.483537	-0.388938	-0.492066	_	_	_	_
AT1G07330	Chr1:2251131-2253585[+]	protein_coding_gene	#N/A	unknown protein; BEST Arabidopsis thaliana protein match is: unknown protein (TAIR:AT2G29620.1); Has 597 Blast hits to 536 proteins in 121 species: Archae - 2; Bacteria - 47; Metazoa - 170; Fungi - 43; Plants - 98; Viruses - 0; Other Eukaryotes - 237 (source: NCBI BLink).	0.0285777	0.0326236	0.030842	0.175466	0.274879	0.190964	0.109969	2.61781	3.26538	_	_	U	U
AT1G07350	Chr1:2257425-2260101[-]	protein_coding_gene	#N/A	RNA-binding (RRM/RBD/RNP motifs) family protein	49.86	23.2016	20.3501	12.2922	19.9899	-1.10366	-1.29285	-2.02014	-1.31861	D	D	D	D
AT1G07360	Chr1:2260389-2262865[-]	protein_coding_gene	#N/A	CCCH-type zinc fingerfamily protein with RNA-binding domain	24.4081	33.8534	34.2331	32.6362	28.0519	0.471941	0.488032	0.419113	0.200738	_	_	_	_
AT1G07370	Chr1:2263140-2264551[+]	protein_coding_gene	PCNA1, ATPCNA1	proliferating cellular nuclear antigen 1	19.4947	25.5626	26.6267	14.6605	17.1237	0.390952	0.449791	-0.411147	-0.187087	_	_	_	_
AT1G07380	Chr1:2264829-2268306[-]	protein_coding_gene	#N/A	Neutral/alkaline non-lysosomal ceramidase	6.92785	6.43356	7.57615	6.54156	5.55441	-0.10679	0.129057	-0.0827728	-0.318774	_	_	_	_
AT1G07390	Chr1:2269893-2274820[+]	protein_coding_gene	AtRLP1, RLP1	receptor like protein 1	5.70312	8.36859	9.52128	7.79272	7.57889	0.553232	0.739403	0.450375	0.410235	_	_	_	_
AT1G07400	Chr1:2274943-2275758[+]	protein_coding_gene	#N/A	HSP20-like chaperones superfamily protein	16.0648	4.47015	10.6978	4.06202	6.29631	-1.84551	-0.586588	-1.98363	-1.35132	D	_	D	D
AT1G07410	Chr1:2276053-2277154[+]	protein_coding_gene	ATRABA2B, RAB-A2B, ATRAB-A2B, RABA2b	RAB GTPase homolog A2B	3.68042	3.87803	4.25411	2.83365	3.84676	0.0754534	0.208986	-0.377208	0.0637732	_	_	_	_
AT1G07420	Chr1:2277807-2280297[+]	protein_coding_gene	ATSMO2, SMO2-1	sterol 4-alpha-methyl-oxidase 2-1	19.0771	35.6092	49.3264	34.1796	41.7723	0.900408	1.37052	0.841293	1.1307	_	U	_	U
AT1G07430	Chr1:2280835-2282828[-]	protein_coding_gene	HAI2	highly ABA-induced PP2C gene 2	0.155539	16.0239	55.1474	2.87104	19.5537	6.68671	8.46978	4.20614	6.97393	U	U	U	U
AT1G07440	Chr1:2286149-2287730[-]	protein_coding_gene	#N/A	NAD(P)-binding Rossmann-fold superfamily protein	30.4933	27.666	46.5563	23.2565	22.3874	-0.140378	0.610484	-0.390858	-0.445805	_	_	_	_
AT1G07450	Chr1:2287926-2289336[-]	protein_coding_gene	#N/A	NAD(P)-binding Rossmann-fold superfamily protein	2.87801	1.55649	0.96332	1.64808	0.956821	-0.886771	-1.57897	-0.804282	-1.58874	_	D	_	D
AT1G07470	Chr1:2291457-2294588[+]	protein_coding_gene	#N/A	Transcription factor IIA, alpha/beta subunit	17.0774	23.0485	28.9556	22.6023	32.4361	0.432584	0.761754	0.404381	0.925512	_	_	_	_
AT1G07473	Chr1:2294566-2295489[-]	protein_coding_gene	#N/A	unknown protein; BEST Arabidopsis thaliana protein match is: unknown protein (TAIR:AT1G07476.1); Has 22 Blast hits to 22 proteins in 6 species: Archae - 0; Bacteria - 0; Metazoa - 0; Fungi - 0; Plants - 22; Viruses - 0; Other Eukaryotes - 0 (source: NCBI BLink).	0.00742191	0.0399735	0.103255	0.0873313	0.35823	2.4276	3.79647	3.55486	5.59105	_	U	U	U
AT1G07476	Chr1:2295751-2296497[+]	protein_coding_gene	#N/A	unknown protein; FUNCTIONS IN: molecular_function unknown; INVOLVED IN: biological_process unknown; LOCATED IN: chloroplast; BEST Arabidopsis thaliana protein match is: unknown protein (TAIR:AT1G07473.1); Has 23 Blast hits to 23 proteins in 6 species: Archae - 0; Bacteria - 0; Metazoa - 0; Fungi - 0; Plants - 23; Viruses - 0; Other Eukaryotes - 0 (source: NCBI BLink).	0	0	0	0.0385402	0.145464	0	0	11.9125	13.8285	_	_	_	U
AT1G07480	Chr1:2296023-2299470[-]	protein_coding_gene	#N/A	Transcription factor IIA, alpha/beta subunit	14.3502	18.1512	21.3851	18.9657	26.821	0.338994	0.575535	0.402322	0.902292	_	_	_	_
AT1G07485	Chr1:2301375-2302121[+]	protein_coding_gene	#N/A	unknown protein; FUNCTIONS IN: molecular_function unknown; INVOLVED IN: biological_process unknown; LOCATED IN: cellular_component unknown; EXPRESSED IN: shoot apex, embryo, leaf whorl, pedicel; EXPRESSED DURING: 4 anthesis, D bilateral stage; Has 5 Blast hits to 5 proteins in 3 species: Archae - 0; Bacteria - 0; Metazoa - 0; Fungi - 0; Plants - 5; Viruses - 0; Other Eukaryotes - 0 (source: NCBI …	0.901674	1.03092	0.82505	0.727472	0.539124	0.193253	-0.128123	-0.30971	-0.741978	_	_	_	_
AT1G07490	Chr1:2301380-2302021[-]	protein_coding_gene	RTFL3, DVL9	ROTUNDIFOLIA like 3	6.05738	2.82644	2.70344	1.92136	1.83347	-1.09971	-1.16389	-1.65656	-1.72411	D	D	D	D
AT1G07500	Chr1:2304766-2305031[-]	protein_coding_gene	#N/A	unknown protein; Has 4 Blast hits to 4 proteins in 3 species: Archae - 0; Bacteria - 0; Metazoa - 0; Fungi - 0; Plants - 4; Viruses - 0; Other Eukaryotes - 0 (source: NCBI BLink).	0.674881	0.885591	0.924888	1.08311	3.31782	0.392002	0.45464	0.682467	2.29751	_	_	_	U
AT1G07510	Chr1:2305378-2309544[+]	protein_coding_gene	ftsh10	FTSH protease 10	12.2848	14.3248	15.7936	16.3294	11.6292	0.22164	0.362465	0.410597	-0.0791225	_	_	_	_
AT1G07520	Chr1:2309564-2311805[-]	protein_coding_gene	#N/A	GRAS family transcription factor	6.00363	4.92768	4.63101	7.86744	6.73058	-0.284926	-0.374507	0.390059	0.164896	_	_	_	_
AT1G07530	Chr1:2313582-2316469[-]	protein_coding_gene	SCL14, ATGRAS2, GRAS2	SCARECROW-like 14	18.5608	14.3818	15.5586	17.6723	20.6144	-0.368014	-0.254546	-0.070769	0.151393	_	_	_	_
AT1G07550	Chr1:2322653-2326561[-]	protein_coding_gene	#N/A	Leucine-rich repeat protein kinase family protein	0.185894	0.148406	0.279713	0.167993	0.19421	-0.324911	0.589441	-0.146071	0.063134	_	_	_	_
AT1G07560	Chr1:2327320-2331096[+]	protein_coding_gene	#N/A	Leucine-rich repeat protein kinase family protein	1.15376	1.58009	1.48507	0.865368	0.773632	0.45366	0.364185	-0.414953	-0.576618	_	_	_	_
AT1G07570	Chr1:2331170-2333738[-]	protein_coding_gene	APK1A	Protein kinase superfamily protein	23.311	14.5641	10.1285	25.2048	39.5658	-0.678594	-1.20259	0.112688	0.763243	_	D	_	_
AT1G07590	Chr1:2336523-2339391[-]	protein_coding_gene	#N/A	Tetratricopeptide repeat (TPR)-like superfamily protein	379.991	277.64	386.135	250.316	552.958	-0.45275	0.0231401	-0.602215	0.541205	_	_	_	_
AT1G07600	Chr1:2338904-2339321[-]	protein_coding_gene	MT1A, MT1, LSR4, MT-Q, ATMT-2, ATMT-Q, ATMT1	metallothionein 1A	20705.8	22053	27737	12911	35588	0.09094	0.421777	-0.681434	0.781356	_	_	_	_
AT1G07610	Chr1:2341542-2342123[+]	protein_coding_gene	MT1C	metallothionein 1C	189.762	166.499	269.881	98.5748	307.418	-0.188678	0.508132	-0.9449	0.69601	_	_	_	_
AT1G07615	Chr1:2342198-2344271[-]	protein_coding_gene	#N/A	GTP-binding protein Obg/CgtA	7.97604	8.47019	6.54808	7.64582	6.44679	0.0867216	-0.2846	-0.0610013	-0.307091	_	_	_	_
AT1G07620	Chr1:2344390-2346842[-]	protein_coding_gene	ATOBGM	GTP-binding protein Obg/CgtA	2.3469	1.60065	1.04064	3.76686	3.99199	-0.552096	-1.17328	0.682604	0.766349	_	D	_	_
AT1G07630	Chr1:2349097-2351692[+]	protein_coding_gene	PLL5	pol-like 5	12.9533	19.419	18.0914	26.6465	25.9263	0.584149	0.481984	1.04063	1.0011	_	_	U	U
AT1G07640	Chr1:2354354-2356227[-]	protein_coding_gene	OBP2	Dof-type zinc finger DNA-binding family protein	20.1313	28.3809	38.0404	27.775	32.0257	0.49548	0.918092	0.464346	0.669789	_	_	_	_
AT1G07650	Chr1:2359549-2366561[-]	protein_coding_gene	#N/A	Leucine-rich repeat transmembrane protein kinase	18.4212	28.4099	25.5411	45.8181	32.1614	0.625026	0.471453	1.31455	0.803963	_	_	U	_
AT1G07660	Chr1:2368837-2369734[+]	protein_coding_gene	#N/A	Histone superfamily protein	42.3169	41.0133	41.244	30.8512	33.0336	-0.0451421	-0.0370497	-0.455907	-0.3573	_	_	_	_
AT1G07670	Chr1:2370052-2374545[-]	protein_coding_gene	ATECA4, ECA4	endomembrane-type CA-ATPase 4	21.4795	25.0959	23.073	22.7429	20.1429	0.224491	0.103245	0.0824558	-0.092689	_	_	_	_
AT1G07680	Chr1:2376012-2377186[+]	protein_coding_gene	#N/A	unknown protein; FUNCTIONS IN: molecular_function unknown; INVOLVED IN: biological_process unknown; LOCATED IN: endomembrane system; BEST Arabidopsis thaliana protein match is: unknown protein (TAIR:AT5G23903.1); Has 7 Blast hits to 7 proteins in 2 species: Archae - 0; Bacteria - 0; Metazoa - 0; Fungi - 0; Plants - 7; Viruses - 0; Other Eukaryotes - 0 (source: NCBI BLink).	0.561008	0.37882	0.0300534	0.272927	0.313132	-0.566496	-4.22197	-1.03948	-0.84123	_	D	D	_
AT1G07700	Chr1:2379647-2381362[+]	protein_coding_gene	#N/A	Thioredoxin superfamily protein	46.2979	39.2893	32.8737	39.6064	40.7995	-0.23681	-0.494013	-0.225213	-0.182395	_	_	_	_
AT1G07705	Chr1:2381615-2386092[+]	protein_coding_gene	#N/A	NOT2 / NOT3 / NOT5 family	15.5318	17.2545	16.4461	16.5547	12.9612	0.151748	0.0825204	0.0920158	-0.261026	_	_	_	_
AT1G07710	Chr1:2386275-2387986[-]	protein_coding_gene	#N/A	Ankyrin repeat family protein	0.416963	0.606275	0.257697	0.426747	0.444977	0.540042	-0.694222	0.0334608	0.0938092	_	_	_	_
AT1G07720	Chr1:2390655-2392453[-]	protein_coding_gene	KCS3	3-ketoacyl-CoA synthase 3	33.6921	119.588	278.915	72.7298	178.201	1.82759	3.04934	1.11014	2.40302	U	U	U	U
AT1G07725	Chr1:2394801-2397272[-]	protein_coding_gene	ATEXO70H6, EXO70H6	exocyst subunit exo70 family protein H6	0.0659142	0.103892	0.160726	0.104377	0.141046	0.656343	1.28581	0.663062	1.09739	_	U	_	U
AT1G07728	Chr1:2395451-2397345[+]	other_RNA	#N/A	other RNA	10.1217	10.3203	9.44379	10.9284	12.1744	0.0280333	-0.100014	0.11063	0.266399	_	_	_	_
AT1G07730	Chr1:2397527-2398696[-]	protein_coding_gene	#N/A	Disease resistance-responsive (dirigent-like protein) family protein	0	0	0	0	0	0	0	0	0	_	_	_	_
AT1G07740	Chr1:2397442-2400508[-]	protein_coding_gene	#N/A	Tetratricopeptide repeat (TPR)-like superfamily protein	2.76864	3.02789	3.21573	3.14433	2.43709	0.129135	0.215968	0.183575	-0.184017	_	_	_	_
AT1G07745	Chr1:2400589-2402873[-]	protein_coding_gene	ATRAD51D, RAD51D, SSN1	homolog of RAD51 D	6.25025	4.53414	4.29007	5.48415	5.17516	-0.463084	-0.542912	-0.188646	-0.27231	_	_	_	_
AT1G07750	Chr1:2404037-2405943[-]	protein_coding_gene	#N/A	RmlC-like cupins superfamily protein	35.6313	31.8782	39.2464	29.5834	33.7192	-0.160575	0.139415	-0.268357	-0.0795748	_	_	_	_
AT1G07770	Chr1:2408203-2409580[-]	protein_coding_gene	RPS15A	ribosomal protein S15A	558.97	460.839	419.13	389.885	543.46	-0.278508	-0.415373	-0.519722	-0.040597	_	_	_	_
AT1G07780	Chr1:2410056-2412677[-]	protein_coding_gene	PAI1	phosphoribosylanthranilate isomerase 1	22.5442	21.3806	19.7855	18.5237	18.5634	-0.0764539	-0.188313	-0.283384	-0.280295	_	_	_	_
AT1G07790	Chr1:2412980-2413708[+]	protein_coding_gene	HTB1	Histone superfamily protein	48.1996	60.7061	62.1071	37.6945	37.6339	0.33282	0.365737	-0.354667	-0.356988	_	_	_	_
AT1G07795	Chr1:2414286-2414967[+]	protein_coding_gene	#N/A	unknown protein; BEST Arabidopsis thaliana protein match is: unknown protein (TAIR:AT2G28725.1); Has 38 Blast hits to 38 proteins in 11 species: Archae - 0; Bacteria - 0; Metazoa - 0; Fungi - 0; Plants - 38; Viruses - 0; Other Eukaryotes - 0 (source: NCBI BLink).	0.382093	0.248997	0.654583	0.142625	0.0693147	-0.617775	0.776637	-1.42163	-2.46252	_	_	D	D
AT1G07810	Chr1:2416265-2420757[+]	protein_coding_gene	ECA1, ATECA1, ACA3	ER-type Ca2+-ATPase 1	21.1746	28.6677	34.6062	25.7818	21.2388	0.437091	0.708696	0.284018	0.00436754	_	_	_	_
AT1G07820	Chr1:2421216-2421947[-]	protein_coding_gene	#N/A	Histone superfamily protein	145.285	138.954	173.204	98.8448	93.2975	-0.0642784	0.253586	-0.555649	-0.638975	_	_	_	_
AT1G07830	Chr1:2422241-2423655[+]	protein_coding_gene	#N/A	ribosomal protein L29 family protein	32.706	32.9184	24.5803	26.2045	33.0903	0.00933889	-0.412053	-0.319741	0.016853	_	_	_	_
AT1G07840	Chr1:2424054-2426676[+]	protein_coding_gene	#N/A	Sas10/Utp3/C1D family	21.7229	19.8628	14.0986	19.6407	20.6793	-0.129148	-0.623664	-0.14537	-0.0710293	_	_	_	_
AT1G07850	Chr1:2426745-2428719[+]	protein_coding_gene	#N/A	Protein of unknown function (DUF604)	0.017293	0.0405896	0.00973173	0.131616	0.330467	1.23044	-0.828772	2.92735	4.25546	_	_	U	U
AT1G07860	Chr1:2428911-2429431[-]	protein_coding_gene	#N/A	BEST Arabidopsis thaliana protein match is: Protein kinase superfamily protein (TAIR:AT1G07870.2); Has 7 Blast hits to 7 proteins in 4 species: Archae - 0; Bacteria - 0; Metazoa - 0; Fungi - 0; Plants - 7; Viruses - 0; Other Eukaryotes - 0 (source: NCBI BLink).	0	0.347566	0	1.86346	9.06307	15.085	0	17.5076	19.7896	U	_	U	U
AT1G07870	Chr1:2428773-2432057[-]	protein_coding_gene	#N/A	Protein kinase superfamily protein	6.96044	16.6553	18.1073	11.4475	27.8229	1.25873	1.37932	0.717781	1.99902	U	U	_	U
AT1G07880	Chr1:2434030-2435763[-]	protein_coding_gene	ATMPK13	Protein kinase superfamily protein	5.83718	4.69049	4.10782	6.30483	4.78916	-0.315532	-0.506898	0.111186	-0.285498	_	_	_	_
AT1G07885	Chr1:2436467-2436959[-]	protein_coding_gene	#N/A	unknown protein; FUNCTIONS IN: molecular_function unknown; INVOLVED IN: biological_process unknown; LOCATED IN: cellular_component unknown; Has 0 Blast hits to 0 proteins in 0 species (source: NCBI BLink).	48.4985	25.4562	27.6936	27.7981	23.8426	-0.929923	-0.808387	-0.802954	-1.0244	_	_	_	_
AT1G07890	Chr1:2437330-2439665[+]	protein_coding_gene	APX1, MEE6, CS1, ATAPX1, ATAPX01	ascorbate peroxidase 1	1115.13	896.279	959.204	798.636	1008.34	-0.315192	-0.217302	-0.481602	-0.14523	_	_	_	_
AT1G07900	Chr1:2442622-2443632[+]	protein_coding_gene	LBD1	LOB domain-containing protein 1	1.23808	10.2239	86.2005	5.4148	33.9286	3.04576	6.12151	2.12879	4.77631	U	U	U	U
AT1G07901	Chr1:2443971-2444123[-]	protein_coding_gene	#N/A	unknown protein; Has 30201 Blast hits to 17322 proteins in 780 species: Archae - 12; Bacteria - 1396; Metazoa - 17338; Fungi - 3422; Plants - 5037; Viruses - 0; Other Eukaryotes - 2996 (source: NCBI BLink).	0	1.17152	4.07835	3.07031	4.38904	16.838	18.6376	18.228	18.7435	_	_	_	_
AT1G07910	Chr1:2445470-2454645[+]	protein_coding_gene	ATRNL, RNL, AtRLG1	RNAligase	6.20956	8.88925	8.98883	7.84451	6.94872	0.51757	0.533642	0.337192	0.162256	_	_	_	_
AT1G07920	Chr1:2454846-2457321[+]	protein_coding_gene	#N/A	GTP binding Elongation factor Tu family protein	569.401	680.294	684.702	484.261	458.465	0.256713	0.266031	-0.23366	-0.312633	_	_	_	_
AT1G07930	Chr1:2458244-2460790[+]	protein_coding_gene	#N/A	GTP binding Elongation factor Tu family protein	515.282	585.48	536.93	410.977	385.243	0.184258	0.0593718	-0.326305	-0.419593	_	_	_	_
AT1G07940	Chr1:2462953-2465504[-]	protein_coding_gene	#N/A	GTP binding Elongation factor Tu family protein	513.589	607.08	612.287	433.768	416.592	0.241272	0.253594	-0.243691	-0.301979	_	_	_	_
AT1G07950	Chr1:2465770-2467022[-]	protein_coding_gene	MED22B	Surfeit locus protein 5 subunit 22 of Mediator complex	26.14	24.8193	21.0686	18.7836	20.6109	-0.0747967	-0.311165	-0.476785	-0.342851	_	_	_	_
AT1G07960	Chr1:2467161-2469154[+]	protein_coding_gene	ATPDIL5-1, PDIL5-1	PDI-like 5-1	38.9163	39.7698	39.9013	34.5114	38.3504	0.0312987	0.0360612	-0.173302	-0.0211329	_	_	_	_
AT1G07970	Chr1:2469286-2472628[-]	protein_coding_gene	#N/A	CONTAINS InterPro DOMAIN/s: Cytochrome B561-related, N-terminal (InterPro:IPR019176); Has 215 Blast hits to 213 proteins in 79 species: Archae - 0; Bacteria - 6; Metazoa - 131; Fungi - 22; Plants - 42; Viruses - 0; Other Eukaryotes - 14 (source: NCBI BLink).	9.24721	7.71838	6.86024	7.73818	6.20359	-0.26072	-0.430759	-0.257024	-0.575914	_	_	_	_
AT1G07980	Chr1:2473165-2474927[-]	protein_coding_gene	NF-YC10	nuclear factor Y, subunit C10	19.156	15.8026	17.8268	15.9289	17.3355	-0.277634	-0.103749	-0.26615	-0.144067	_	_	_	_
AT1G07985	Chr1:2475405-2476155[+]	protein_coding_gene	#N/A	Expressed protein	3.53896	6.25506	34.357	1.48638	21.9186	0.821696	3.2792	-1.25152	2.63075	_	U	D	U
AT1G07990	Chr1:2477157-2483138[+]	protein_coding_gene	#N/A	SIT4 phosphatase-associated family protein	18.1474	18.8422	24.1794	20.9614	17.9745	0.0542045	0.414015	0.207972	-0.0138112	_	_	_	_
AT1G08000	Chr1:2483240-2485109[-]	protein_coding_gene	GATA10	GATA transcription factor 10	8.95341	8.09549	7.93888	8.3398	9.66277	-0.145319	-0.173502	-0.102424	0.109999	_	_	_	_
AT1G08005	Chr1:2485344-2485511[+]	protein_coding_gene	#N/A	BEST Arabidopsis thaliana protein match is: SIT4 phosphatase-associated family protein (TAIR:AT1G07990.1); Has 17 Blast hits to 17 proteins in 3 species: Archae - 0; Bacteria - 0; Metazoa - 0; Fungi - 0; Plants - 17; Viruses - 0; Other Eukaryotes - 0 (source: NCBI BLink).	6.51431	2.73542	4.16617	2.98707	2.56203	-1.25185	-0.644889	-1.12488	-1.34632	_	_	_	_
AT1G08010	Chr1:2485906-2488027[-]	protein_coding_gene	GATA11	GATA transcription factor 11	19.6033	19.3454	19.6515	17.8513	13.4982	-0.019106	0.0035429	-0.135067	-0.538329	_	_	_	_
AT1G08030	Chr1:2489501-2493250[-]	protein_coding_gene	TPST	tyrosylprotein sulfotransferase	12.6604	11.395	10.4199	14.4969	12.9381	-0.151922	-0.280981	0.195421	0.0313028	_	_	_	_
AT1G08035	Chr1:2494402-2495149[+]	protein_coding_gene	#N/A	unknown protein; BEST Arabidopsis thaliana protein match is: unknown protein (TAIR:AT2G28330.1); Has 10 Blast hits to 10 proteins in 3 species: Archae - 0; Bacteria - 0; Metazoa - 0; Fungi - 0; Plants - 10; Viruses - 0; Other Eukaryotes - 0 (source: NCBI BLink).	0.211223	0.39793	0.306085	0.34581	0.385835	0.913716	0.535144	0.711186	0.869186	_	_	_	_
AT1G08040	Chr1:2495342-2498764[-]	protein_coding_gene	#N/A	Protein of unknown function (DUF707)	12.4394	15.4489	29.5824	12.3279	17.2603	0.312587	1.24982	-0.0129898	0.47254	_	U	_	_
AT1G08050	Chr1:2498836-2501427[-]	protein_coding_gene	#N/A	Zinc finger (C3HC4-type RING finger) family protein	3.22747	5.45696	5.42215	6.32535	9.36429	0.757692	0.74846	0.970739	1.53676	_	_	_	U
AT1G08060	Chr1:2501742-2511084[-]	protein_coding_gene	MOM, MOM1	ATP-dependent helicase family protein	3.89642	4.3242	4.95954	5.37995	3.97489	0.150284	0.348056	0.465443	0.0287657	_	_	_	_
AT1G08070	Chr1:2514192-2516605[-]	protein_coding_gene	OTP82	Tetratricopeptide repeat (TPR)-like superfamily protein	1.24129	1.10174	1.65263	1.62208	1.96803	-0.172055	0.412921	0.386002	0.664908	_	_	_	_
AT1G08080	Chr1:2516991-2518546[-]	protein_coding_gene	ATACA7, ACA7	alpha carbonic anhydrase 7	0.0687817	0.16027	0.275104	0.111171	0.134829	1.22029	1.99972	0.692604	0.970931	U	U	_	_
AT1G08090	Chr1:2524076-2526164[+]	protein_coding_gene	ATNRT2:1, NRT2, NRT2;1AT, ACH1, LIN1, ATNRT2.1, NRT2.1, NRT2:1	nitrate transporter 2:1	0.763559	0.260413	1.06223	0.600855	0.702843	-1.5519	0.476279	-0.345718	-0.119536	D	_	_	_
AT1G08100	Chr1:2527170-2529120[-]	protein_coding_gene	ATNRT2.2, ACH2, NRT2;2AT, NRT2.2	nitrate transporter 2.2	0.0142191	0	0.0368238	0.00324942	0.0173868	-10.4746	1.37219	-2.12616	0.289978	_	_	_	_
AT1G08105	Chr1:2531695-2534786[-]	transposable_element_gene	#N/A	transposable element gene	0.00658674	0.00674993	0.0039967	0.00817338	0.00415779	0.0352551	-0.719339	0.310944	-0.662471	_	_	_	_
AT1G08110	Chr1:2535328-2537931[+]	protein_coding_gene	#N/A	lactoylglutathione lyase family protein / glyoxalase I family protein	90.2989	88.1155	93.4743	89.0618	95.483	-0.0353126	0.0498613	-0.0199016	0.0805355	_	_	_	_
AT1G08115	Chr1:2538076-2538237[-]	snRNA	#N/A	snRNA	106.734	72.7467	45.8469	61.3599	231.817	-0.553066	-1.21912	-0.798652	1.11897	_	D	_	U
AT1G08120	Chr1:2538615-2539661[+]	protein_coding_gene	#N/A	BEST Arabidopsis thaliana protein match is: Protein kinase superfamily protein (TAIR:AT5G26110.1); Has 235 Blast hits to 235 proteins in 96 species: Archae - 21; Bacteria - 0; Metazoa - 117; Fungi - 8; Plants - 47; Viruses - 0; Other Eukaryotes - 42 (source: NCBI BLink).	0.0722005	0.170718	0.0839857	0.14452	0.209893	1.24142	0.218107	1.00109	1.53944	U	_	U	U
AT1G08125	Chr1:2539614-2542334[-]	protein_coding_gene	#N/A	S-adenosyl-L-methionine-dependent methyltransferases superfamily protein	17.2808	18.9155	16.722	19.099	14.8449	0.130399	-0.0474226	0.144327	-0.219202	_	_	_	_
AT1G08130	Chr1:2542702-2547946[-]	protein_coding_gene	ATLIG1, LIG1	DNA ligase 1	13.2696	16.451	19.6387	16.0771	14.4209	0.31005	0.565574	0.276882	0.120036	_	_	_	_
AT1G08160	Chr1:2559487-2560403[-]	protein_coding_gene	#N/A	Late embryogenesis abundant (LEA) hydroxyproline-rich glycoprotein family	8.11036	7.82806	8.00078	8.33706	6.7388	-0.0511111	-0.0196253	0.0397727	-0.267274	_	_	_	_
AT1G08165	Chr1:2561627-2562148[-]	protein_coding_gene	#N/A	unknown protein; FUNCTIONS IN: molecular_function unknown; INVOLVED IN: biological_process unknown; LOCATED IN: cellular_component unknown; Has 30201 Blast hits to 17322 proteins in 780 species: Archae - 12; Bacteria - 1396; Metazoa - 17338; Fungi - 3422; Plants - 5037; Viruses - 0; Other Eukaryotes - 2996 (source: NCBI BLink).	0.924544	1.37977	0.933766	1.81618	2.74221	0.577609	0.0143189	0.974086	1.56851	_	_	_	U
AT1G08170	Chr1:2562941-2563672[-]	protein_coding_gene	#N/A	Histone superfamily protein	0	0.0319796	0.0180138	0.0752958	0.182414	11.6434	10.8157	12.8785	14.155	_	_	U	U
AT1G08180	Chr1:2564572-2565121[-]	protein_coding_gene	#N/A	unknown protein; Has 53 Blast hits to 53 proteins in 9 species: Archae - 0; Bacteria - 0; Metazoa - 1; Fungi - 0; Plants - 52; Viruses - 0; Other Eukaryotes - 0 (source: NCBI BLink).	26.3208	16.3979	12.9424	13.7652	27.8841	-0.682692	-1.0241	-0.935177	0.0832393	_	D	_	_
AT1G08190	Chr1:2567475-2573393[+]	protein_coding_gene	ATVPS41, ZIP2, VPS41, ATVAM2, VAM2	vacuolar protein sorting 41	32.277	43.8756	66.7464	31.1826	33.3333	0.442912	1.04818	-0.0497653	0.0464576	_	U	_	_
AT1G08200	Chr1:2573848-2576714[-]	protein_coding_gene	AXS2	UDP-D-apiose/UDP-D-xylose synthase 2	133.825	172.668	229.914	168.988	283.238	0.367653	0.780747	0.336573	1.08167	_	_	_	U
AT1G08210	Chr1:2577020-2580669[-]	protein_coding_gene	#N/A	Eukaryotic aspartyl protease family protein	13.9011	11.155	10.5734	12.9618	13.2248	-0.317508	-0.394759	-0.100933	-0.0719531	_	_	_	_
AT1G08220	Chr1:2581022-2583323[-]	protein_coding_gene	#N/A	FUNCTIONS IN: molecular_function unknown; INVOLVED IN: mitochondrial proton-transporting ATP synthase complex assembly; LOCATED IN: mitochondrial inner membrane; EXPRESSED IN: 18 plant structures; EXPRESSED DURING: 7 growth stages; CONTAINS InterPro DOMAIN/s: ATPase assembly factor ATP10, mitochondria (InterPro:IPR007849); Has 152 Blast hits to 152 proteins in 76 species: Archae - 6; Bacteria - 0…	10.5363	12.2072	10.4771	10.0443	9.38108	0.212364	-0.00812888	-0.0689912	-0.167542	_	_	_	_
AT1G08230	Chr1:2583654-2586744[-]	protein_coding_gene	#N/A	Transmembrane amino acid transporter family protein	13.0912	14.8306	40.3323	16.4835	23.6493	0.179979	1.62334	0.332425	0.8532	_	U	_	_
AT1G08250	Chr1:2588857-2590301[-]	protein_coding_gene	ADT6	arogenate dehydratase 6	8.30104	9.70888	15.6088	11.1156	15.7799	0.226013	0.910995	0.421221	0.926723	_	_	_	_
AT1G08260	Chr1:2590944-2606892[+]	protein_coding_gene	EMB142, EMB2284, POL2A, TIL1, EMB529, ABO4, ESD7	DNA polymerase epsilon catalytic subunit	3.57315	4.58228	5.60336	5.69386	4.80508	0.358868	0.649094	0.672209	0.427363	_	_	_	_
AT1G08270	Chr1:2606269-2607507[-]	protein_coding_gene	#N/A	CONTAINS InterPro DOMAIN/s: MIT (InterPro:IPR007330); BEST Arabidopsis thaliana protein match is: AAA-type ATPase family protein (TAIR:AT2G27600.1); Has 1133 Blast hits to 1133 proteins in 252 species: Archae - 47; Bacteria - 0; Metazoa - 540; Fungi - 145; Plants - 223; Viruses - 0; Other Eukaryotes - 178 (source: NCBI BLink).	0.35164	0.760476	0.725341	1.15306	0.948406	1.11278	1.04454	1.71327	1.43138	U	U	U	U
AT1G08280	Chr1:2608408-2609853[+]	protein_coding_gene	#N/A	Glycosyltransferase family 29 (sialyltransferase) family protein	6.88021	11.6508	9.31299	8.28211	4.00969	0.759904	0.436791	0.267545	-0.77896	_	_	_	_
AT1G08290	Chr1:2609996-2613242[-]	protein_coding_gene	WIP3	WIP domain protein 3	1.1959	1.77256	2.03231	2.41645	3.00951	0.567734	0.765019	1.01479	1.33142	_	_	U	U
AT1G08300	Chr1:2614774-2618823[+]	protein_coding_gene	NVL	no vein-like	3.28417	2.67486	1.48913	2.49732	1.78936	-0.296064	-1.14105	-0.395147	-0.876081	_	D	_	_
AT1G08310	Chr1:2618647-2620452[+]	protein_coding_gene	#N/A	alpha/beta-Hydrolases superfamily protein	1.05205	0.612442	0.591858	1.09328	1.12568	-0.780548	-0.82987	0.0554591	0.0975926	_	_	_	_
AT1G08315	Chr1:2620335-2621545[-]	protein_coding_gene	#N/A	ARM repeat superfamily protein	19.0387	10.6777	18.1693	9.92387	11.5816	-0.834333	-0.0674321	-0.93996	-0.7171	_	_	_	_
AT1G08320	Chr1:2621904-2627848[-]	protein_coding_gene	TGA9, bZIP21	bZIP transcription factor family protein	5.55037	4.95984	6.83372	3.5397	4.18151	-0.16229	0.300087	-0.648955	-0.408559	_	_	_	_
AT1G08340	Chr1:2631068-2632871[+]	protein_coding_gene	#N/A	Rho GTPase activating protein with PAK-box/P21-Rho-binding domain	3.26557	2.97147	3.44527	2.44116	2.6878	-0.136158	0.077282	-0.419766	-0.280908	_	_	_	_
AT1G08350	Chr1:2632810-2635852[-]	protein_coding_gene	#N/A	Endomembrane protein 70 protein family	6.58678	6.7295	6.43372	6.11442	4.61381	0.0309259	-0.0339202	-0.107358	-0.513614	_	_	_	_
AT1G08360	Chr1:2636011-2637915[+]	protein_coding_gene	#N/A	Ribosomal protein L1p/L10e family	427.916	474.903	429.52	366.928	427.683	0.150305	0.00539769	-0.221831	-0.00078576	_	_	_	_
AT1G08370	Chr1:2638181-2640554[+]	protein_coding_gene	DCP1, ATDCP1	decapping 1	32.0392	36.0118	34.7342	31.9774	29.0155	0.168632	0.116519	-0.00278548	-0.143014	_	_	_	_
AT1G08380	Chr1:2640813-2641828[-]	protein_coding_gene	PSAO	photosystem I subunit O	2518.09	1969.13	1837.81	1531.93	1731.44	-0.354771	-0.454342	-0.716979	-0.540357	_	_	_	_
AT1G08390	Chr1:2642214-2643285[+]	protein_coding_gene	#N/A	unknown protein; Has 62 Blast hits to 62 proteins in 27 species: Archae - 0; Bacteria - 0; Metazoa - 34; Fungi - 0; Plants - 28; Viruses - 0; Other Eukaryotes - 0 (source: NCBI BLink).	10.5321	7.31176	6.65182	5.51287	7.30996	-0.526502	-0.662971	-0.933916	-0.526857	_	_	_	_
AT1G08400	Chr1:2643330-2646035[-]	protein_coding_gene	#N/A	RINT-1 / TIP-1 family	3.48899	4.17452	3.51279	3.75833	3.09154	0.2588	0.00980784	0.107282	-0.174483	_	_	_	_
AT1G08410	Chr1:2646189-2649379[+]	protein_coding_gene	#N/A	P-loop containing nucleoside triphosphate hydrolases superfamily protein	13.8749	15.0958	12.2924	14.4271	13.7149	0.12167	-0.174711	0.0563039	-0.0167333	_	_	_	_
AT1G08420	Chr1:2649537-2657120[+]	protein_coding_gene	BSL2	BRI1 suppressor 1 (BSU1)-like 2	19.4282	21.5289	21.0148	22.3806	17.6516	0.148122	0.113253	0.204096	-0.138353	_	_	_	_
AT1G08430	Chr1:2658716-2661029[+]	protein_coding_gene	ALMT1, ATALMT1	aluminum-activated malate transporter 1	1.05544	2.15299	3.09228	0.933824	0.640323	1.02849	1.55082	-0.17662	-0.720964	U	U	_	_
AT1G08440	Chr1:2663027-2665343[+]	protein_coding_gene	#N/A	Aluminium activated malate transporter family protein	0.00841522	0.044088	0.343726	0.0461785	0.0658751	2.38793	5.35044	2.45475	2.96717	U	U	U	U
AT1G08450	Chr1:2667798-2671892[-]	protein_coding_gene	CRT3	calreticulin 3	43.1805	47.5497	59.1075	47.6885	55.7701	0.139056	0.452961	0.143261	0.369112	_	_	_	_
AT1G08460	Chr1:2672451-2674628[+]	protein_coding_gene	HDA08, HDA8, ATHDA8	histone deacetylase 8	15.117	11.52	13.098	11.4917	11.7363	-0.392031	-0.206825	-0.395579	-0.365194	_	_	_	_
AT1G08465	Chr1:2675813-2679781[+]	protein_coding_gene	YAB2	Plant-specific transcription factor YABBY family protein	18.6697	13.3162	16.1466	14.5539	19.0634	-0.487516	-0.209468	-0.359293	0.0301067	_	_	_	_
AT1G08470	Chr1:2682127-2684100[-]	protein_coding_gene	SSL3	strictosidine synthase-like 3	12.3517	11.3214	14.017	10.1626	17.2398	-0.125657	0.182468	-0.28144	0.481033	_	_	_	_
AT1G08480	Chr1:2684234-2685621[+]	protein_coding_gene	#N/A	unknown protein; FUNCTIONS IN: molecular_function unknown; INVOLVED IN: biological_process unknown; LOCATED IN: mitochondrion, plasma membrane, plastid, vacuole; EXPRESSED IN: 27 plant structures; EXPRESSED DURING: 15 growth stages; Has 39 Blast hits to 39 proteins in 13 species: Archae - 0; Bacteria - 0; Metazoa - 0; Fungi - 0; Plants - 39; Viruses - 0; Other Eukaryotes - 0 (source: NCBI BLink).	114.373	109.981	127.874	80.8451	113.533	-0.0564922	0.160976	-0.500514	-0.0106348	_	_	_	_
AT1G08490	Chr1:2685659-2688595[-]	protein_coding_gene	ATSUFS, SUFS, ATCPNIFS, ATNFS2, CPNIFS	chloroplastic NIFS-like cysteine desulfurase	31.7883	32.4779	29.5914	32.6044	34.5791	0.0309625	-0.103318	0.0365708	0.121404	_	_	_	_
AT1G08500	Chr1:2689016-2690045[+]	protein_coding_gene	ENODL18, AtENODL18	early nodulin-like protein 18	5.94371	12.4045	28.7678	6.66564	41.763	1.06143	2.27502	0.165379	2.81279	U	U	_	U
AT1G08510	Chr1:2691080-2694377[-]	protein_coding_gene	FATB	fatty acyl-ACP thioesterases B	70.9051	55.7066	107.211	35.8366	42.3895	-0.348041	0.596492	-0.984455	-0.742182	_	_	_	_
AT1G08520	Chr1:2696412-2700959[+]	protein_coding_gene	ALB1, ALB-1V, V157, PDE166, CHLD	ALBINA 1	92.4689	82.7352	78.6236	87.998	70.5031	-0.160467	-0.234006	-0.0714975	-0.391281	_	_	_	_
AT1G08530	Chr1:2701226-2703091[+]	protein_coding_gene	#N/A	unknown protein; FUNCTIONS IN: molecular_function unknown; INVOLVED IN: biological_process unknown; LOCATED IN: chloroplast; BEST Arabidopsis thaliana protein match is: unknown protein (TAIR:AT5G09995.2); Has 140 Blast hits to 140 proteins in 53 species: Archae - 0; Bacteria - 63; Metazoa - 0; Fungi - 0; Plants - 76; Viruses - 0; Other Eukaryotes - 1 (source: NCBI BLink).	20.1284	19.0033	22.2054	17.8177	19.2102	-0.0829825	0.141678	-0.175921	-0.0673599	_	_	_	_
AT1G08540	Chr1:2703336-2706845[+]	protein_coding_gene	SIGB, SIG1, SIG2, SIGA, ATSIG1, ABC1, ATSIG2	RNApolymerase sigma subunit 2	58.6324	54.4822	57.8748	55.2118	46.9987	-0.105913	-0.0187628	-0.0867215	-0.319077	_	_	_	_
AT1G08550	Chr1:2706924-2709531[+]	protein_coding_gene	NPQ1, AVDE1	non-photochemical quenching 1	25.154	19.5818	29.4302	25.4713	29.2704	-0.361274	0.226509	0.0180848	0.218655	_	_	_	_
AT1G08560	Chr1:2709632-2710912[-]	protein_coding_gene	SYP111, KN, ATSYP111	syntaxin of plants 111	24.7893	29.3456	28.936	21.9815	25.7457	0.243427	0.223148	-0.173428	0.0546139	_	_	_	_
AT1G08570	Chr1:2712883-2714734[+]	protein_coding_gene	ACHT4	atypical CYS HIS rich thioredoxin 4	61.9351	62.89	74.0739	36.6327	141.209	0.0220734	0.258208	-0.757625	1.189	_	_	_	U
AT1G08580	Chr1:2715079-2716404[-]	protein_coding_gene	#N/A	unknown protein; Has 39 Blast hits to 39 proteins in 15 species: Archae - 0; Bacteria - 0; Metazoa - 0; Fungi - 0; Plants - 35; Viruses - 0; Other Eukaryotes - 4 (source: NCBI BLink).	73.3816	72.3246	58.5222	61.8089	68.8662	-0.0209319	-0.326434	-0.247604	-0.0916223	_	_	_	_
AT1G08590	Chr1:2718778-2722221[+]	protein_coding_gene	#N/A	Leucine-rich receptor-like protein kinase family protein	1.81685	1.51259	1.15046	1.05248	0.738184	-0.264417	-0.659224	-0.787641	-1.29938	_	_	_	D
AT1G08592	Chr1:2718875-2721676[-]	other_RNA	#N/A	Potential natural antisense gene, locus overlaps with AT1G08590	2.77867	2.43686	2.7882	2.35198	2.29599	-0.18937	0.00493953	-0.240518	-0.275277	_	_	_	_
AT1G08600	Chr1:2723824-2733613[+]	protein_coding_gene	ATRX	P-loop containing nucleoside triphosphate hydrolases superfamily protein	6.98637	7.65629	8.11633	8.95793	6.84019	0.132102	0.216284	0.358622	-0.0305066	_	_	_	_
AT1G08610	Chr1:2733657-2735819[-]	protein_coding_gene	#N/A	Pentatricopeptide repeat (PPR) superfamily protein	8.90724	8.65473	6.00013	9.75948	7.34819	-0.0414896	-0.569984	0.131826	-0.277589	_	_	_	_
AT1G08620	Chr1:2736774-2743758[+]	protein_coding_gene	PKDM7D	Transcription factor jumonji (jmj) family protein / zinc finger (C5HC2 type) family protein	7.63021	10.6265	12.4985	12.2987	10.1012	0.477871	0.71196	0.68871	0.404732	_	_	_	_
AT1G08630	Chr1:2743761-2747967[-]	protein_coding_gene	THA1	threonine aldolase 1	7.80721	7.14547	26.9925	11.491	11.1099	-0.127778	1.78968	0.557625	0.508966	_	U	_	_
AT1G08640	Chr1:2748398-2751278[-]	protein_coding_gene	CJD1	Chloroplast J-like domain 1	106.752	105.471	115.224	90.648	95.2672	-0.0174167	0.110178	-0.235916	-0.164212	_	_	_	_
AT1G08650	Chr1:2752154-2753703[+]	protein_coding_gene	PPCK1	phosphoenolpyruvate carboxylase kinase 1	16.6817	58.9599	34.7591	73.9117	133.232	1.82147	1.05912	2.14754	2.9976	U	U	U	U
AT1G08660	Chr1:2757041-2759794[-]	protein_coding_gene	MGP2	MALE GAMETOPHYTE DEFECTIVE 2	24.523	26.4795	24.0452	26.3773	19.9526	0.11074	-0.0283865	0.105161	-0.297559	_	_	_	_
AT1G08670	Chr1:2760346-2761573[-]	protein_coding_gene	#N/A	ENTH/VHS family protein	2.60006	1.05293	0.850638	1.15611	1.02317	-1.30413	-1.61192	-1.16926	-1.34549	D	D	D	D
AT1G08680	Chr1:2762584-2768967[+]	protein_coding_gene	ZIGA4	ARF GAP-like zinc finger-containing protein ZIGA4	18.6201	18.9565	20.9297	21.2356	16.0916	0.0258318	0.168691	0.189624	-0.210553	_	_	_	_
AT1G08700	Chr1:2769815-2771477[-]	protein_coding_gene	PS1	Presenilin-1	26.1351	23.3522	22.1798	20.3404	16.3881	-0.16243	-0.236742	-0.36164	-0.67334	_	_	_	_
AT1G08710	Chr1:2771633-2773460[+]	protein_coding_gene	#N/A	F-box family protein	11.3444	9.71389	9.15399	9.53727	8.65026	-0.223859	-0.309507	-0.250332	-0.391165	_	_	_	_
AT1G08720	Chr1:2774030-2779297[+]	protein_coding_gene	EDR1, ATEDR1	Protein kinase superfamily protein	9.55363	8.29254	8.73076	15.3457	11.9355	-0.204235	-0.129942	0.683713	0.321138	_	_	_	_
AT1G08730	Chr1:2779963-2788447[+]	protein_coding_gene	XIC, ATXIC	Myosin family protein with Dil domain	0.2216	0.245304	0.253243	0.273831	0.271853	0.146607	0.192556	0.305315	0.294857	_	_	_	_
AT1G08750	Chr1:2801067-2804537[+]	protein_coding_gene	#N/A	Peptidase C13 family	12.064	12.9115	13.9016	12.1181	11.3531	0.0979482	0.204542	0.00645518	-0.087622	_	_	_	_
AT1G08760	Chr1:2805371-2808621[+]	protein_coding_gene	#N/A	Plant protein of unknown function (DUF936)	9.52135	9.86023	12.0792	8.36421	8.23972	0.0504551	0.343287	-0.186937	-0.208571	_	_	_	_
AT1G08770	Chr1:2808883-2809747[+]	protein_coding_gene	PRA1.E	prenylated RAB acceptor 1.E	29.7851	25.6278	23.7809	22.6998	30.2311	-0.216881	-0.324787	-0.391911	0.0214427	_	_	_	_
AT1G08780	Chr1:2809778-2811191[-]	protein_coding_gene	AIP3, PFD4	ABI3-interacting protein 3	37.374	40.0337	40.3331	36.7359	41.0427	0.09918	0.109929	-0.0248444	0.135091	_	_	_	_
AT1G08800	Chr1:2813061-2818008[-]	protein_coding_gene	#N/A	Protein of unknown function, DUF593	10.9564	10.0446	10.6963	17.7143	51.6358	-0.125354	-0.034662	0.69314	2.2366	_	_	_	U
AT1G08810	Chr1:2819065-2820395[-]	protein_coding_gene	MYB60, AtMYB60	myb domain protein 60	11.8942	4.5586	2.71435	10.6113	11.8365	-1.38359	-2.13158	-0.164657	-0.00701569	D	D	_	_
AT1G08820	Chr1:2821552-2825275[-]	protein_coding_gene	VAP27-2	vamp/synaptobrevin-associated protein 27-2	31.8335	35.1605	37.7463	37.8607	40.8959	0.14341	0.245789	0.250155	0.36141	_	_	_	_
AT1G08830	Chr1:2827061-2829315[+]	protein_coding_gene	CSD1	copper/zinc superoxide dismutase 1	282.964	273.927	314.476	256.449	343.075	-0.046827	0.152331	-0.141947	0.277905	_	_	_	_
AT1G08840	Chr1:2829105-2838469[-]	protein_coding_gene	emb2411	DNA replication helicase, putative	1.56801	1.83524	1.84734	2.47078	2.26391	0.227033	0.236513	0.656028	0.529879	_	_	_	_
AT1G08845	Chr1:2838789-2840994[+]	protein_coding_gene	#N/A	Ribosomal L18p/L5e family protein	13.8901	10.2724	8.47475	9.6022	10.4108	-0.435283	-0.712814	-0.53262	-0.415976	_	_	_	_
AT1G08860	Chr1:2842153-2846138[+]	protein_coding_gene	BON3	Calcium-dependent phospholipid-binding Copine family protein	0.0335165	0.0653468	0.0978557	0.229934	0.179361	0.963035	1.5455	2.77791	2.41957	_	U	U	U
AT1G08880	Chr1:2846949-2847800[-]	protein_coding_gene	HTA5, H2AXA, G-H2AX, GAMMA-H2AX	Histone superfamily protein	121.191	160.647	148.909	98.0142	116.431	0.406611	0.297148	-0.30622	-0.0578073	_	_	_	_
AT1G08890	Chr1:2848348-2852270[+]	protein_coding_gene	#N/A	Major facilitator superfamily protein	7.10315	25.1863	80.9122	18.1558	40.1365	1.82611	3.50982	1.3539	2.49838	U	U	U	U
AT1G08900	Chr1:2852454-2855779[+]	protein_coding_gene	#N/A	Major facilitator superfamily protein	13.5409	7.47648	7.28226	10.4428	7.1723	-0.856892	-0.894865	-0.374815	-0.916815	_	_	_	_
AT1G08910	Chr1:2856227-2861170[+]	protein_coding_gene	#N/A	zinc ion binding;zinc ion binding	9.42665	9.63296	7.67774	13.3288	11.3009	0.031234	-0.296063	0.499729	0.26162	_	_	_	_
AT1G08920	Chr1:2867259-2870656[+]	protein_coding_gene	ESL1	ERD (early response to dehydration) six-like 1	11.4666	10.256	58.5715	14.7604	21.5166	-0.160969	2.35276	0.364294	0.908012	_	U	_	_
AT1G08930	Chr1:2873465-2877270[+]	protein_coding_gene	ERD6	Major facilitator superfamily protein	174.248	78.5736	35.4665	251.411	134.963	-1.14903	-2.29661	0.528906	-0.368578	D	D	_	_
AT1G08940	Chr1:2877692-2879169[+]	protein_coding_gene	#N/A	Phosphoglycerate mutase family protein	11.5571	8.09341	15.1579	14.7372	11.7737	-0.513959	0.39129	0.350683	0.0267883	_	_	_	_
AT1G08960	Chr1:2879642-2882231[+]	protein_coding_gene	CAX11, ATCAX11	cation exchanger 11	10.5999	13.0243	13.9506	13.0795	10.3531	0.297155	0.396276	0.303256	-0.0339878	_	_	_	_
AT1G08970	Chr1:2882524-2884337[+]	protein_coding_gene	HAP5C, NF-YC9	nuclear factor Y, subunit C9	37.7482	45.5708	60.3819	32.7807	42.737	0.271702	0.677708	-0.203561	0.179078	_	_	_	_
AT1G08980	Chr1:2884411-2886620[+]	protein_coding_gene	ATAMI1, AMI1, ATTOC64-I, TOC64-I	amidase 1	42.931	25.4957	35.4233	37.3073	36.4591	-0.751766	-0.277321	-0.202562	-0.235741	_	_	_	_
AT1G08985	Chr1:2887285-2887706[+]	protein_coding_gene	#N/A	AP2/B3-like transcriptional factor family protein	0	0	0	0.324004	0.533383	0	0	14.9838	15.7029	_	_	U	U
AT1G08990	Chr1:2888753-2890959[+]	protein_coding_gene	PGSIP5	plant glycogenin-like starch initiation protein 5	1.49373	1.64807	3.33134	0.905938	1.00337	0.141857	1.15718	-0.721429	-0.574061	_	U	_	_
AT1G09000	Chr1:2891037-2895182[+]	protein_coding_gene	ANP1, MAPKKK1, NP1	NPK1-related protein kinase 1	1.89536	1.92143	1.97713	2.21849	2.28788	0.0197084	0.0609355	0.227105	0.271538	_	_	_	_
AT1G09010	Chr1:2895166-2899384[-]	protein_coding_gene	#N/A	glycoside hydrolase family 2 protein	26.0889	19.212	25.6057	20.6596	14.1993	-0.441428	-0.0269711	-0.336624	-0.877616	_	_	_	_
AT1G09020	Chr1:2899914-2904815[-]	protein_coding_gene	SNF4, ATSNF4	homolog of yeast sucrose nonfermenting 4	25.8439	26.9342	28.8407	26.0583	22.8846	0.0596154	0.158282	0.0119192	-0.175447	_	_	_	_
AT1G09040	Chr1:2911317-2915369[+]	protein_coding_gene	#N/A	unknown protein; FUNCTIONS IN: molecular_function unknown; INVOLVED IN: biological_process unknown; LOCATED IN: membrane; EXPRESSED IN: leaf; BEST Arabidopsis thaliana protein match is: unknown protein (TAIR:AT1G09050.1); Has 614 Blast hits to 567 proteins in 104 species: Archae - 2; Bacteria - 12; Metazoa - 344; Fungi - 31; Plants - 81; Viruses - 0; Other Eukaryotes - 144 (source: NCBI BLink).	2.13774	2.33272	2.15174	2.49712	1.89482	0.125926	0.00941732	0.224178	-0.174025	_	_	_	_
AT1G09050	Chr1:2918031-2920889[+]	protein_coding_gene	#N/A	unknown protein; BEST Arabidopsis thaliana protein match is: unknown protein (TAIR:AT1G09040.1); Has 552 Blast hits to 499 proteins in 115 species: Archae - 0; Bacteria - 86; Metazoa - 259; Fungi - 14; Plants - 77; Viruses - 0; Other Eukaryotes - 116 (source: NCBI BLink).	2.18907	2.26236	2.47387	2.41126	1.69267	0.0475102	0.176451	0.139469	-0.371015	_	_	_	_
AT1G09060	Chr1:2921064-2925762[-]	protein_coding_gene	#N/A	Zinc finger, RING-type;Transcription factor jumonji/aspartyl beta-hydroxylase	15.3828	12.8377	13.3919	19.5444	14.4943	-0.260931	-0.199957	0.345437	-0.0858324	_	_	_	_
AT1G09070	Chr1:2927703-2928968[+]	protein_coding_gene	SRC2, (AT)SRC2	soybean gene regulated by cold-2	211.325	119.989	99.1764	340.317	245.698	-0.816561	-1.09139	0.687416	0.217423	_	D	_	_
AT1G09080	Chr1:2929217-2931841[-]	protein_coding_gene	BIP3	Heat shock protein 70 (Hsp 70) family protein	0.680877	0.951761	3.15367	0.351537	0.457284	0.483199	2.21155	-0.953698	-0.574293	_	U	_	_
AT1G09090	Chr1:2932739-2936586[+]	protein_coding_gene	ATRBOHB, ATRBOHB-BETA, RBOHB	respiratory burst oxidase homolog B	2.52952	0.943425	0.32125	1.54129	1.01779	-1.42287	-2.97706	-0.714722	-1.31342	D	D	_	D
AT1G09100	Chr1:2936528-2939326[-]	protein_coding_gene	RPT5B	26S proteasome AAA-ATPase subunit RPT5B	27.6487	27.0236	27.6996	28.8649	28.0351	-0.0329918	0.00265349	0.0621046	0.0200226	_	_	_	_
AT1G09130	Chr1:2939570-2942288[-]	protein_coding_gene	#N/A	ATP-dependent caseinolytic (Clp) protease/crotonase family protein	129.578	131.98	143.407	131.198	104.507	0.0264985	0.146295	0.0179249	-0.310221	_	_	_	_
AT1G09140	Chr1:2942564-2945961[-]	protein_coding_gene	ATSRP30, SR30, At-SR30	SERINE-ARGININE PROTEIN 30	80.1502	59.5475	57.0204	58.0145	45.6688	-0.428665	-0.491228	-0.466293	-0.811497	_	_	_	_
AT1G09150	Chr1:2946229-2949159[+]	protein_coding_gene	#N/A	pseudouridine synthase and archaeosine transglycosylase (PUA) domain-containing protein	41.0078	42.7981	42.6675	37.4472	43.5971	0.0616484	0.0572392	-0.13104	0.0883338	_	_	_	_
AT1G09155	Chr1:2949676-2950989[-]	protein_coding_gene	AtPP2-B15, PP2-B15	phloem protein 2-B15	0.968466	1.03795	2.72511	0.394527	0.609077	0.0999626	1.49253	-1.29556	-0.669068	_	U	D	_
AT1G09157	Chr1:2951665-2952396[-]	protein_coding_gene	#N/A	Protein of unknown function (DUF679)	0.110609	0.150544	0.0501479	1.80571	2.68603	0.444682	-1.14105	4.0289	4.60181	_	_	U	U
AT1G09160	Chr1:2952771-2955689[-]	protein_coding_gene	#N/A	Protein phosphatase 2C family protein	24.7875	20.4402	17.0811	23.3576	14.9627	-0.278203	-0.537212	-0.0857207	-0.728242	_	_	_	_
AT1G09170	Chr1:2956589-2962207[-]	protein_coding_gene	#N/A	P-loop nucleoside triphosphate hydrolases superfamily protein with CH (Calponin Homology) domain	0.407004	0.519581	1.2123	0.291847	0.32617	0.352298	1.57461	-0.479817	-0.31941	_	U	_	_
AT1G09176	Chr1:2964152-2964604[+]	protein_coding_gene	#N/A	unknown protein; FUNCTIONS IN: molecular_function unknown; INVOLVED IN: biological_process unknown; LOCATED IN: endomembrane system; Has 30201 Blast hits to 17322 proteins in 780 species: Archae - 12; Bacteria - 1396; Metazoa - 17338; Fungi - 3422; Plants - 5037; Viruses - 0; Other Eukaryotes - 2996 (source: NCBI BLink).	0.163056	0.266206	0.318168	0.0641454	0.0679694	0.707141	0.964378	-1.34581	-1.26229	_	_	_	_
AT1G09180	Chr1:2965023-2965972[+]	protein_coding_gene	ATSAR1, ATSARA1A, SARA1A	secretion-associated RAS super family 1	2.15495	4.47152	5.89916	3.09798	10.8679	1.05311	1.45285	0.523671	2.33434	U	U	_	U
AT1G09190	Chr1:2966120-2967718[-]	protein_coding_gene	#N/A	Tetratricopeptide repeat (TPR)-like superfamily protein	3.23851	3.81767	4.47178	4.04987	3.37145	0.237362	0.465518	0.322545	0.0580388	_	_	_	_
AT1G09195	Chr1:2967940-2971498[-]	protein_coding_gene	#N/A	FUNCTIONS IN: molecular_function unknown; INVOLVED IN: biological_process unknown; CONTAINS InterPro DOMAIN/s: Metal-dependent phosphohydrolase, HD subdomain (InterPro:IPR006674), Ppx/GppA phosphatase (InterPro:IPR003695).	3.05234	3.95261	4.21282	5.31478	3.40327	0.372889	0.464869	0.800092	0.157005	_	_	_	_
AT1G09200	Chr1:2971593-2972199[-]	protein_coding_gene	#N/A	Histone superfamily protein	153.144	191.754	260.672	140.486	112.851	0.324368	0.767347	-0.124462	-0.44047	_	_	_	_
AT1G09210	Chr1:2972842-2976750[-]	protein_coding_gene	CRT1b, AtCRT1b	calreticulin 1b	129.058	136.112	99.7058	92.5512	76.6058	0.0767747	-0.37227	-0.479696	-0.752494	_	_	_	_
AT1G09220	Chr1:2977792-2979466[-]	protein_coding_gene	#N/A	Pentatricopeptide repeat (PPR) superfamily protein	1.51604	1.70556	2.20846	1.86555	1.30047	0.169937	0.54273	0.299291	-0.221273	_	_	_	_
AT1G09230	Chr1:2979520-2982624[-]	protein_coding_gene	#N/A	RNA-binding (RRM/RBD/RNP motifs) family protein	13.009	12.4475	10.5555	15.6889	11.7406	-0.063654	-0.301515	0.270234	-0.148004	_	_	_	_
AT1G09240	Chr1:2984881-2986130[+]	protein_coding_gene	NAS3, ATNAS3	nicotianamine synthase 3	6.02695	4.77424	10.3624	6.31053	6.06006	-0.336156	0.781857	0.066333	0.00790397	_	_	_	_
AT1G09250	Chr1:2989378-2990357[+]	protein_coding_gene	#N/A	basic helix-loop-helix (bHLH) DNA-binding superfamily protein	22.8565	17.5453	11.3471	15.8764	10.9531	-0.38152	-1.01028	-0.52572	-1.06126	_	D	_	D
AT1G09270	Chr1:2994369-2998222[+]	protein_coding_gene	IMPA-4	importin alpha isoform 4	30.9951	35.6589	36.7844	31.6191	30.3126	0.202222	0.247054	0.0287561	-0.0321225	_	_	_	_
AT1G09280	Chr1:2998100-3001315[-]	protein_coding_gene	#N/A	CONTAINS InterPro DOMAIN/s: Rhodanese-like (InterPro:IPR001763), Serine hydrolase (InterPro:IPR005645); BEST Arabidopsis thaliana protein match is: Rhodanese/Cell cycle control phosphatase superfamily protein (TAIR:AT2G40760.1); Has 5925 Blast hits to 5912 proteins in 1592 species: Archae - 0; Bacteria - 2946; Metazoa - 156; Fungi - 408; Plants - 229; Viruses - 0; Other Eukaryotes - 2186 (source:…	9.91136	9.00117	8.3605	10.0409	9.39547	-0.13897	-0.245494	0.0187336	-0.0771176	_	_	_	_
AT1G09290	Chr1:3001517-3003762[-]	protein_coding_gene	#N/A	unknown protein; Has 73 Blast hits to 71 proteins in 26 species: Archae - 0; Bacteria - 0; Metazoa - 5; Fungi - 11; Plants - 54; Viruses - 0; Other Eukaryotes - 3 (source: NCBI BLink).	17.412	15.1645	11.767	13.7144	13.5566	-0.199384	-0.565335	-0.34439	-0.361086	_	_	_	_
AT1G09300	Chr1:3003495-3008213[+]	protein_coding_gene	#N/A	Metallopeptidase M24 family protein	11.8936	12.3823	12.2248	12.8228	10.3445	0.0580938	0.0396254	0.108526	-0.201321	_	_	_	_
AT1G09310	Chr1:3009055-3009880[+]	protein_coding_gene	#N/A	Protein of unknown function, DUF538	1010	1213.94	2623.21	906.928	1722.61	0.265342	1.37698	-0.155295	0.770241	_	U	_	_
AT1G09320	Chr1:3009941-3012363[-]	protein_coding_gene	#N/A	agenet domain-containing protein	5.25049	4.38914	3.93951	5.47409	5.23812	-0.258513	-0.414435	0.060167	-0.00340295	_	_	_	_
AT1G09330	Chr1:3012762-3015091[-]	protein_coding_gene	#N/A	unknown protein; FUNCTIONS IN: molecular_function unknown; INVOLVED IN: biological_process unknown; LOCATED IN: integral to membrane; EXPRESSED IN: 24 plant structures; EXPRESSED DURING: 15 growth stages; CONTAINS InterPro DOMAIN/s: Protein of unknown function DUF846, eukaryotic (InterPro:IPR008564); Has 518 Blast hits to 518 proteins in 206 species: Archae - 0; Bacteria - 0; Metazoa - 193; Fungi…	65.6513	66.631	67.0881	60.149	74.8036	0.02137	0.0312333	-0.126283	0.188284	_	_	_	_
AT1G09340	Chr1:3015328-3018234[+]	protein_coding_gene	CRB, CSP41B, HIP1.3	chloroplast RNA binding	315.489	235.873	152.88	223.756	194.575	-0.419579	-1.04519	-0.495663	-0.697263	_	D	_	_
AT1G09350	Chr1:3019819-3021441[+]	protein_coding_gene	AtGolS3, GolS3	galactinol synthase 3	0.170936	4.68395	0.835227	17.7502	63.7185	4.77612	2.28864	6.69815	8.54203	U	U	U	U
AT1G09360	Chr1:3021802-3022368[+]	protein_coding_gene	#N/A	Plant invertase/pectin methylesterase inhibitor superfamily protein	0	0	0	0.0913115	0.295307	0	0	13.1567	14.85	_	_	U	U
AT1G09380	Chr1:3026135-3029549[-]	protein_coding_gene	#N/A	nodulin MtN21 /EamA-like transporter family protein	0.341764	0.300177	0.433429	0.254874	0.217885	-0.187181	0.342786	-0.423202	-0.64941	_	_	_	_
AT1G09390	Chr1:3031203-3033582[+]	protein_coding_gene	#N/A	GDSL-like Lipase/Acylhydrolase superfamily protein	22.5716	13.6582	11.8195	19.6607	9.5315	-0.724741	-0.933339	-0.199194	-1.24373	_	_	_	D
AT1G09400	Chr1:3033512-3035036[-]	protein_coding_gene	#N/A	FMN-linked oxidoreductases superfamily protein	0.120442	0.0900056	0.107853	0.162217	0.129862	-0.420211	-0.159258	0.429556	0.108632	_	_	_	_
AT1G09410	Chr1:3035443-3037560[+]	protein_coding_gene	#N/A	pentatricopeptide (PPR) repeat-containing protein	0.784729	1.09679	1.40486	1.16584	0.731669	0.483016	0.840152	0.571097	-0.101002	_	_	_	_
AT1G09415	Chr1:3037754-3038408[-]	protein_coding_gene	NIMIN-3	NIM1-interacting 3	29.1435	13.3121	19.0438	16.7724	12.8587	-1.13044	-0.613853	-0.797085	-1.18043	D	_	_	D
AT1G09420	Chr1:3038462-3041873[-]	protein_coding_gene	G6PD4	glucose-6-phosphate dehydrogenase 4	6.93066	8.35153	8.18606	10.8195	7.14815	0.269047	0.240176	0.642568	0.0445771	_	_	_	_
AT1G09421	Chr1:3038631-3039326[+]	other_RNA	#N/A	other RNA	0.39171	0.259594	0.305808	0.525781	0.416395	-0.59351	-0.357149	0.424667	0.0881646	_	_	_	_
AT1G09430	Chr1:3041996-3045402[+]	protein_coding_gene	ACLA-3	ATP-citrate lyase A-3	59.862	61.7252	65.7673	61.3902	60.5064	0.0442191	0.13573	0.0363679	0.0154473	_	_	_	_
AT1G09440	Chr1:3045513-3047893[-]	protein_coding_gene	#N/A	Protein kinase superfamily protein	10.436	5.42286	7.16867	6.84876	4.57824	-0.944442	-0.541791	-0.607653	-1.1887	_	_	_	D
AT1G09450	Chr1:3049024-3053112[+]	protein_coding_gene	#N/A	Protein kinase superfamily protein	1.66987	1.59064	1.70483	2.1557	1.92553	-0.070128	0.0298919	0.368419	0.205519	_	_	_	_
AT1G09460	Chr1:3053901-3055360[+]	protein_coding_gene	#N/A	Carbohydrate-binding X8 domain superfamily protein	18.6584	6.70792	4.99565	15.1566	8.01911	-1.47589	-1.90108	-0.299879	-1.21831	D	D	_	D
AT1G09470	Chr1:3055231-3057443[-]	protein_coding_gene	#N/A	unknown protein; FUNCTIONS IN: molecular_function unknown; BEST Arabidopsis thaliana protein match is: unknown protein (TAIR:AT5G26770.1).	3.49088	3.62439	2.6474	3.95951	2.81492	0.0541473	-0.399013	0.181731	-0.310496	_	_	_	_
AT1G09480	Chr1:3057975-3060661[+]	protein_coding_gene	#N/A	NAD(P)-binding Rossmann-fold superfamily protein	2.3369	2.17082	1.80349	2.51856	2.39491	-0.106355	-0.373803	0.108003	0.0353753	_	_	_	_
AT1G09486	Chr1:3062430-3063731[-]	pseudogene	#N/A	pseudogene, 60S ribosomal protein L21 (RPL21B), temporary automated functional assignment; blastp match of 67% identity and 2.0e-52 P-value to GP	1.20072	1.81275	1.1616	1.82152	1.57207	0.594276	-0.047786	0.601239	0.388763	_	_	_	_
AT1G09490	Chr1:3064124-3065937[+]	protein_coding_gene	#N/A	NAD(P)-binding Rossmann-fold superfamily protein	33.6091	26.479	61.7542	23.8489	26.3562	-0.344003	0.877685	-0.494929	-0.350709	_	_	_	_
AT1G09500	Chr1:3066699-3068598[+]	protein_coding_gene	#N/A	NAD(P)-binding Rossmann-fold superfamily protein	13.1284	7.89749	58.0941	8.34657	6.3632	-0.733224	2.1457	-0.653435	-1.04487	_	U	_	D
AT1G09510	Chr1:3069385-3070910[+]	protein_coding_gene	#N/A	NAD(P)-binding Rossmann-fold superfamily protein	0.00664338	0.0413887	0.295761	0.018328	0.0516616	2.63743	5.47425	1.46268	2.95721	_	U	_	U
AT1G09520	Chr1:3070946-3072050[-]	protein_coding_gene	#N/A	LOCATED IN: chloroplast; EXPRESSED IN: 21 plant structures; EXPRESSED DURING: 12 growth stages; CONTAINS InterPro DOMAIN/s: Zinc finger, PHD-type, conserved site (InterPro:IPR019786); BEST Arabidopsis thaliana protein match is: PHD finger family protein (TAIR:AT3G17460.1); Has 56 Blast hits to 56 proteins in 17 species: Archae - 0; Bacteria - 2; Metazoa - 0; Fungi - 4; Plants - 46; Viruses - 0; O…	27.505	45.7369	44.505	16.5472	30.3535	0.733664	0.694273	-0.733106	0.142169	_	_	_	_
AT1G09530	Chr1:3076582-3079539[+]	protein_coding_gene	PIF3, POC1, PAP3	phytochrome interacting factor 3	33.8858	61.1484	108.645	12.0594	34.4482	0.851634	1.68087	-1.49052	0.0237478	_	U	D	_
AT1G09540	Chr1:3086159-3087912[+]	protein_coding_gene	MYB61, ATMYB61	myb domain protein 61	1.2588	1.46293	1.7879	0.644956	0.605154	0.21681	0.506214	-0.964766	-1.05666	_	_	_	D
AT1G09560	Chr1:3093839-3094864[+]	protein_coding_gene	GLP5	germin-like protein 5	156.208	202.668	283.33	165.066	150.216	0.37565	0.859015	0.0795746	-0.0564299	_	_	_	_
AT1G09570	Chr1:3095256-3100357[-]	protein_coding_gene	PHYA, FHY2, FRE1, HY8	phytochrome A	36.2388	41.314	49.2361	42.7013	27.4793	0.189096	0.442181	0.236745	-0.39919	_	_	_	_
AT1G09575	Chr1:3101671-3102925[-]	protein_coding_gene	#N/A	Protein of unknown function (DUF607)	8.89668	3.5162	3.28289	8.62989	8.11916	-1.33925	-1.4383	-0.0439248	-0.131936	D	D	_	_
AT1G09580	Chr1:3104588-3106290[+]	protein_coding_gene	#N/A	emp24/gp25L/p24 family/GOLD family protein	16.5813	18.171	17.8	12.6344	14.467	0.132081	0.10232	-0.3922	-0.196791	_	_	_	_
AT1G09590	Chr1:3106502-3107772[+]	protein_coding_gene	#N/A	Translation protein SH3-like family protein	461.733	505.761	417.931	367.493	395.585	0.131397	-0.143794	-0.329342	-0.223071	_	_	_	_
AT1G09600	Chr1:3108617-3111318[+]	protein_coding_gene	#N/A	Protein kinase superfamily protein	0.349292	0.556249	0.403959	0.457632	0.317738	0.671282	0.20977	0.389745	-0.136592	_	_	_	_
AT1G09610	Chr1:3111694-3112873[+]	protein_coding_gene	#N/A	Protein of unknown function (DUF579)	1.45572	0.997698	0.946521	1.04553	0.766839	-0.545053	-0.621021	-0.477495	-0.924728	_	_	_	_
AT1G09620	Chr1:3112778-3116699[-]	protein_coding_gene	#N/A	ATP binding;leucine-tRNA ligases;aminoacyl-tRNA ligases;nucleotide binding;ATP binding;aminoacyl-tRNA ligases	62.0436	70.2906	63.0592	64.542	53.9333	0.180049	0.0234245	0.0569559	-0.202106	_	_	_	_
AT1G09630	Chr1:3118203-3119708[-]	protein_coding_gene	ATRAB11C, ATRABA2A, ATRAB-A2A, RAB-A2A, RAB11c	RAB GTPase 11C	28.4698	27.9727	25.3956	25.2877	29.0549	-0.0254128	-0.164854	-0.170996	0.0293491	_	_	_	_
AT1G09640	Chr1:3119878-3122526[+]	protein_coding_gene	#N/A	Translation elongation factor EF1B, gamma chain	281.906	286.902	263.848	246.833	266.853	0.0253438	-0.0955071	-0.191679	-0.079169	_	_	_	_
AT1G09645	Chr1:3122956-3124578[+]	protein_coding_gene	#N/A	unknown protein; BEST Arabidopsis thaliana protein match is: unknown protein (TAIR:AT1G57765.1); Has 35333 Blast hits to 34131 proteins in 2444 species: Archae - 798; Bacteria - 22429; Metazoa - 974; Fungi - 991; Plants - 531; Viruses - 0; Other Eukaryotes - 9610 (source: NCBI BLink).	40.0242	35.4888	30.9276	39.9498	44.882	-0.173509	-0.371978	-0.00268429	0.165264	_	_	_	_
AT1G09650	Chr1:3125807-3127284[+]	protein_coding_gene	#N/A	F-box and associated interaction domains-containing protein	0.237833	0.476017	0.353694	0.698986	0.586744	1.00103	0.572533	1.55527	1.30275	U	_	U	U
AT1G09660	Chr1:3127771-3131094[-]	protein_coding_gene	#N/A	RNA-binding KH domain-containing protein	32.0858	24.8037	19.6192	15.3634	14.9646	-0.371379	-0.709668	-1.06244	-1.10038	_	_	D	D
AT1G09680	Chr1:3134107-3135930[-]	protein_coding_gene	#N/A	Pentatricopeptide repeat (PPR) superfamily protein	2.03789	1.97884	2.29421	2.17927	2.17774	-0.042421	0.17092	0.0967683	0.0957551	_	_	_	_
AT1G09690	Chr1:3136188-3137475[-]	protein_coding_gene	#N/A	Translation protein SH3-like family protein	647.016	727.744	649.591	519.324	607.714	0.16963	0.00573026	-0.317166	-0.0904089	_	_	_	_
AT1G09700	Chr1:3137767-3140353[-]	protein_coding_gene	HYL1, DRB1	dsRNA-binding domain-like superfamily protein	11.2107	9.0073	8.45023	9.15555	7.87273	-0.315709	-0.407813	-0.292158	-0.50994	_	_	_	_
AT1G09710	Chr1:3140868-3144370[+]	protein_coding_gene	#N/A	Homeodomain-like superfamily protein	5.06407	3.54226	3.48847	3.83513	2.6754	-0.515626	-0.537702	-0.401021	-0.92054	_	_	_	_
AT1G09730	Chr1:3147667-3154380[-]	protein_coding_gene	#N/A	Cysteine proteinases superfamily protein	11.634	11.344	11.8318	13.6607	12.9043	-0.0364177	0.0243223	0.231684	0.149505	_	_	_	_
AT1G09740	Chr1:3154532-3156275[+]	protein_coding_gene	#N/A	Adenine nucleotide alpha hydrolases-like superfamily protein	42.2727	36.1609	37.6376	29.8613	36.5866	-0.225296	-0.167552	-0.501449	-0.208411	_	_	_	_
AT1G09750	Chr1:3157501-3159148[+]	protein_coding_gene	#N/A	Eukaryotic aspartyl protease family protein	136.283	125.226	134.292	96.9679	35.0341	-0.122071	-0.0212322	-0.491026	-1.95977	_	_	_	D
AT1G09760	Chr1:3159125-3161692[-]	protein_coding_gene	U2A'	U2 small nuclear ribonucleoprotein A	47.8008	44.0914	44.9289	38.6949	45.496	-0.116537	-0.089391	-0.304891	-0.071295	_	_	_	_
AT1G09770	Chr1:3161841-3165360[+]	protein_coding_gene	ATCDC5, CDC5, ATMYBCDC5	cell division cycle 5	38.6576	41.4072	44.9266	44.5014	33.6388	0.0991296	0.216818	0.203099	-0.200626	_	_	_	_
AT1G09780	Chr1:3165370-3167869[-]	protein_coding_gene	#N/A	Phosphoglycerate mutase, 2,3-bisphosphoglycerate-independent	116.95	159.647	167.588	167.651	211.155	0.448994	0.519027	0.519569	0.85241	_	_	_	_
AT1G09794	Chr1:3172108-3173463[+]	protein_coding_gene	#N/A	Cox19 family protein (CHCH motif)	12.6143	12.3731	14.6728	11.0627	14.7113	-0.0278531	0.218084	-0.189356	0.221864	_	_	_	_
AT1G09795	Chr1:3173534-3176910[+]	protein_coding_gene	ATATP-PRT2, HISN1B, ATP-PRT2	ATP phosphoribosyl transferase 2	35.82	38.3693	49.7163	34.7571	46.1128	0.0991871	0.472953	-0.0434576	0.364402	_	_	_	_
AT1G09800	Chr1:3176883-3180421[-]	protein_coding_gene	#N/A	Pseudouridine synthase family protein	4.565	4.47307	3.60302	4.24137	4.3024	-0.0293495	-0.341407	-0.106084	-0.085473	_	_	_	_
AT1G09810	Chr1:3180936-3184224[-]	protein_coding_gene	ECT11	evolutionarily conserved C-terminal region 11	12.5231	10.56	7.40746	8.51373	6.4681	-0.245982	-0.75754	-0.556728	-0.953177	_	_	_	_
AT1G09812	Chr1:3187817-3188580[+]	protein_coding_gene	#N/A	unknown protein; BEST Arabidopsis thaliana protein match is: unknown protein (TAIR:AT1G58007.2); Has 93 Blast hits to 93 proteins in 13 species: Archae - 0; Bacteria - 0; Metazoa - 0; Fungi - 0; Plants - 93; Viruses - 0; Other Eukaryotes - 0 (source: NCBI BLink).	4.57277	3.78411	1.94584	4.22304	4.74154	-0.273114	-1.23267	-0.114786	0.0522872	_	D	_	_
AT1G09815	Chr1:3189369-3190242[+]	protein_coding_gene	POLD4	polymerase delta 4	39.8892	41.439	35.5921	36.0103	40.3607	0.054991	-0.164441	-0.147589	0.016953	_	_	_	_
AT1G09820	Chr1:3190288-3192414[-]	protein_coding_gene	#N/A	Pentatricopeptide repeat (PPR-like) superfamily protein	2.98429	3.45665	3.40448	3.93073	2.6704	0.211986	0.190046	0.397408	-0.160331	_	_	_	_
AT1G09830	Chr1:3192681-3195025[-]	protein_coding_gene	#N/A	Glycinamide ribonucleotide (GAR) synthetase	41.4371	37.4249	29.8807	32.5741	28.9761	-0.146925	-0.471709	-0.347198	-0.516059	_	_	_	_
AT1G09840	Chr1:3195824-3200291[-]	protein_coding_gene	ATSK41, SK41	shaggy-like protein kinase 41	21.1985	24.169	28.103	26.4488	23.2738	0.189196	0.406762	0.31924	0.134745	_	_	_	_
AT1G09850	Chr1:3201799-3204150[+]	protein_coding_gene	XBCP3	xylem bark cysteine peptidase 3	23.1094	24.039	38.0061	19.604	23.3772	0.0568971	0.717751	-0.237332	0.0166223	_	_	_	_
AT1G09860	Chr1:3204016-3205309[-]	protein_coding_gene	ATPUP16, PUP16	purine permease 16	0.0466409	0.0120136	0.0372549	0.0267474	0.0334499	-1.95604	-0.324088	-0.801967	-0.479472	_	_	_	_
AT1G09870	Chr1:3205741-3208598[+]	protein_coding_gene	#N/A	histidine acid phosphatase family protein	19.6056	25.7555	35.3757	23.4208	26.2673	0.393615	0.851493	0.256524	0.422002	_	_	_	_
AT1G09880	Chr1:3208828-3211653[-]	protein_coding_gene	#N/A	Rhamnogalacturonate lyase family protein	0.306123	0.26349	0.359189	0.414881	0.503219	-0.216356	0.230625	0.438574	0.717056	_	_	_	_
AT1G09890	Chr1:3214237-3217538[-]	protein_coding_gene	#N/A	Rhamnogalacturonate lyase family protein	1.96198	1.74715	1.91075	2.1102	1.64737	-0.167306	-0.0381711	0.105069	-0.252144	_	_	_	_
AT1G09900	Chr1:3218133-3219929[+]	protein_coding_gene	#N/A	Pentatricopeptide repeat (PPR-like) superfamily protein	16.437	17.7684	15.5559	16.9015	12.5046	0.112367	-0.0794851	0.0402043	-0.394488	_	_	_	_
AT1G09910	Chr1:3220035-3224541[-]	protein_coding_gene	#N/A	Rhamnogalacturonate lyase family protein	6.93859	6.6386	7.16666	7.42733	6.26008	-0.0637634	0.0466583	0.098201	-0.148461	_	_	_	_
AT1G09920	Chr1:3224684-3227070[-]	protein_coding_gene	#N/A	TRAF-type zinc finger-related	42.2383	33.7384	43.976	38.0873	54.4616	-0.32416	0.0581646	-0.149242	0.366688	_	_	_	_
AT1G09930	Chr1:3227490-3230043[-]	protein_coding_gene	ATOPT2, OPT2	oligopeptide transporter 2	0.0370272	0.0892007	0.0930556	1.20764	1.62679	1.26824	1.32927	5.02708	5.45692	U	U	U	U
AT1G09932	Chr1:3230450-3233109[-]	protein_coding_gene	#N/A	Phosphoglycerate mutase family protein	6.35385	8.3274	5.8685	22.3401	20.6911	0.390235	-0.114639	1.81393	1.70331	_	_	U	U
AT1G09940	Chr1:3236995-3239554[-]	protein_coding_gene	HEMA2	Glutamyl-tRNA reductase family protein	14.2063	8.79737	11.6623	22.3651	17.4627	-0.691386	-0.284678	0.654718	0.297746	_	_	_	_
AT1G09950	Chr1:3240606-3241632[-]	protein_coding_gene	RAS1	RESPONSE TO ABA AND SALT 1	0.501791	1.64151	2.22883	11.9066	80.2205	1.70985	2.15111	4.5685	7.32071	U	U	U	U
AT1G09960	Chr1:3244213-3247200[+]	protein_coding_gene	SUT4, ATSUT4, SUC4, ATSUC4	sucrose transporter 4	3.43158	5.47116	8.39842	5.70732	7.53117	0.672972	1.29124	0.733939	1.134	_	U	_	U
AT1G09970	Chr1:3252240-3255693[+]	protein_coding_gene	LRR XI-23, RLK7	Leucine-rich receptor-like protein kinase family protein	98.8318	88.8064	95.3611	169.117	148.437	-0.154312	-0.0515744	0.774974	0.586803	_	_	_	_
AT1G09980	Chr1:3256245-3261614[-]	protein_coding_gene	#N/A	Putative serine esterase family protein	10.0664	14.5717	15.7552	16.3868	12.9022	0.533621	0.64628	0.702986	0.358069	_	_	_	_
AT1G09995	Chr1:3262265-3263612[-]	protein_coding_gene	#N/A	DNA repair DEAD helicase RAD3/XP-D subfamily protein	7.52585	9.81801	9.83309	10.8729	9.67572	0.383576	0.38579	0.53081	0.362514	_	_	_	_
AT1G10000	Chr1:3263877-3264788[-]	protein_coding_gene	#N/A	Ribonuclease H-like superfamily protein	0.591017	0.288712	0.128706	0.268774	0.228859	-1.03354	-2.19903	-1.13678	-1.3687	D	D	D	D
AT1G10020	Chr1:3269604-3271987[-]	protein_coding_gene	#N/A	Protein of unknown function (DUF1005)	25.9118	14.5447	19.2061	6.96626	5.22337	-0.833115	-0.432044	-1.89515	-2.31055	_	_	D	D
AT1G10030	Chr1:3273825-3275837[+]	protein_coding_gene	ERG28	homolog of yeast ergosterol28	33.2341	31.3486	30.4847	21.5827	24.6753	-0.0842632	-0.124579	-0.622789	-0.429597	_	_	_	_
AT1G10040	Chr1:3275891-3278697[-]	protein_coding_gene	#N/A	alpha/beta-Hydrolases superfamily protein	1.21047	1.82473	1.43372	2.53072	2.12327	0.592112	0.244194	1.06397	0.810715	_	_	U	_
AT1G10050	Chr1:3279270-3283482[+]	protein_coding_gene	#N/A	glycosyl hydrolase family 10 protein / carbohydrate-binding domain-containing protein	4.22719	3.70312	3.87681	4.64243	3.69746	-0.190957	-0.124829	0.135181	-0.193164	_	_	_	_
AT1G10060	Chr1:3284239-3287107[+]	protein_coding_gene	ATBCAT-1, BCAT-1	branched-chain amino acid transaminase 1	9.43552	9.23325	22.3158	8.5285	21.9188	-0.0312634	1.24189	-0.14581	1.21599	_	U	_	U
AT1G10070	Chr1:3288087-3290471[+]	protein_coding_gene	ATBCAT-2, BCAT-2	branched-chain amino acid transaminase 2	14.5553	15.2325	13.0677	33.9393	18.6852	0.0656081	-0.155539	1.22141	0.360351	_	_	U	_
AT1G10090	Chr1:3290311-3296198[-]	protein_coding_gene	#N/A	Early-responsive to dehydration stress protein (ERD4)	9.33577	20.9067	28.9773	37.8013	41.6183	1.16312	1.63408	2.01759	2.15638	U	U	U	U
AT1G10095	Chr1:3297324-3300443[-]	protein_coding_gene	#N/A	Protein prenylyltransferase superfamily protein	2.9712	2.35567	2.72884	3.32975	2.72025	-0.334907	-0.122757	0.164368	-0.127306	_	_	_	_
AT1G10100	Chr1:3300697-3301489[-]	protein_coding_gene	#N/A	unknown protein; Has 9 Blast hits to 9 proteins in 2 species: Archae - 0; Bacteria - 0; Metazoa - 0; Fungi - 0; Plants - 9; Viruses - 0; Other Eukaryotes - 0 (source: NCBI BLink).	0	0	0	0	0.0402001	0	0	0	11.9733	_	_	_	_
AT1G10110	Chr1:3302742-3304092[+]	protein_coding_gene	#N/A	F-box family protein	0.256034	0.419838	0.395088	0.471831	0.390972	0.713475	0.625819	0.881909	0.61071	_	_	_	_
AT1G10120	Chr1:3304039-3306824[-]	protein_coding_gene	#N/A	basic helix-loop-helix (bHLH) DNA-binding superfamily protein	12.4294	11.4896	9.40586	9.90204	8.16841	-0.113428	-0.402125	-0.327959	-0.605629	_	_	_	_
AT1G10130	Chr1:3310930-3322213[+]	protein_coding_gene	ECA3, ATECA3	endoplasmic reticulum-type calcium-transporting ATPase 3	15.9838	19.3198	18.4922	20.7859	16.4005	0.27347	0.210306	0.378995	0.0371293	_	_	_	_
AT1G10140	Chr1:3322802-3323548[-]	protein_coding_gene	#N/A	Uncharacterised conserved protein UCP031279	50.552	13.8415	23.3834	16.1893	15.8777	-1.86877	-1.11228	-1.64273	-1.67077	D	D	D	D
AT1G10150	Chr1:3325824-3327614[+]	protein_coding_gene	#N/A	Carbohydrate-binding protein	21.8731	8.71804	12.8111	5.81527	10.8483	-1.32708	-0.771763	-1.91124	-1.01169	D	_	D	D
AT1G10155	Chr1:3327637-3328448[-]	protein_coding_gene	ATPP2-A10, PP2-A10	phloem protein 2-A10	0.597624	0.500484	0.261301	1.64287	1.78137	-0.255909	-1.19349	1.45889	1.57566	_	D	U	U
AT1G10160	Chr1:3328971-3333470[+]	transposable_element_gene	#N/A	transposable element gene	2.08028	2.10047	1.93864	2.85174	1.54936	0.0139344	-0.101732	0.455063	-0.425103	_	_	_	_
AT1G10170	Chr1:3333595-3337491[-]	protein_coding_gene	ATNFXL1, NFXL1	NF-X-like 1	19.7709	24.9684	21.7865	20.5047	15.0221	0.336725	0.140056	0.0525761	-0.396292	_	_	_	_
AT1G10180	Chr1:3338303-3341608[-]	protein_coding_gene	#N/A	BEST Arabidopsis thaliana protein match is: exocyst complex component 84B (TAIR:AT5G49830.1); Has 132 Blast hits to 132 proteins in 25 species: Archae - 0; Bacteria - 0; Metazoa - 7; Fungi - 0; Plants - 117; Viruses - 0; Other Eukaryotes - 8 (source: NCBI BLink).	9.89392	11.0986	11.3692	11.3961	9.1353	0.165763	0.200516	0.203926	-0.11509	_	_	_	_
AT1G10200	Chr1:3346390-3347885[-]	protein_coding_gene	WLIM1	GATA type zinc finger transcription factor family protein	87.0944	89.9323	110.649	73.6041	96.6815	0.0462594	0.345339	-0.242794	0.15066	_	_	_	_
AT1G10210	Chr1:3349219-3351180[+]	protein_coding_gene	ATMPK1, MPK1	mitogen-activated protein kinase 1	7.29933	4.49275	4.56216	6.62674	8.65274	-0.700164	-0.678046	-0.139465	0.245393	_	_	_	_
AT1G10220	Chr1:3352159-3354856[+]	protein_coding_gene	#N/A	unknown protein; FUNCTIONS IN: molecular_function unknown; INVOLVED IN: biological_process unknown; Has 3 Blast hits to 3 proteins in 1 species: Archae - 0; Bacteria - 0; Metazoa - 0; Fungi - 0; Plants - 3; Viruses - 0; Other Eukaryotes - 0 (source: NCBI BLink).	4.09406	3.87614	7.24812	2.32362	2.02333	-0.0789114	0.824073	-0.817155	-1.0168	_	_	_	D
AT1G10230	Chr1:3355571-3356359[+]	protein_coding_gene	ASK18, SK18	SKP1-like 18	23.8638	23.4272	20.2891	11.6872	18.9776	-0.0266392	-0.234119	-1.02989	-0.330526	_	_	D	_
AT1G10240	Chr1:3356680-3359838[-]	protein_coding_gene	FRS11	FAR1-related sequence 11	7.38779	6.75122	5.86963	4.90432	4.94951	-0.129994	-0.331873	-0.591089	-0.577856	_	_	_	_
AT1G10270	Chr1:3363504-3366488[+]	protein_coding_gene	GRP23	glutamine-rich protein 23	8.34819	10.1227	7.14047	8.46619	4.96119	0.278059	-0.225444	0.0202494	-0.750776	_	_	_	_
AT1G10280	Chr1:3366493-3369095[-]	protein_coding_gene	#N/A	Core-2/I-branching beta-1,6-N-acetylglucosaminyltransferase family protein	3.00014	7.38995	6.31195	4.56735	5.7418	1.30053	1.07305	0.606326	0.936471	U	U	_	_
AT1G10290	Chr1:3370558-3377463[+]	protein_coding_gene	ADL6, DRP2A	dynamin-like protein 6	28.5772	39.0962	37.7988	34.1626	28.3633	0.452164	0.403476	0.257553	-0.0108392	_	_	_	_
AT1G10300	Chr1:3378142-3380226[+]	protein_coding_gene	#N/A	Nucleolar GTP-binding protein	0.344944	0.617893	0.480839	0.625909	0.681463	0.840976	0.47918	0.859572	0.982253	_	_	_	_
AT1G10310	Chr1:3381601-3383914[-]	protein_coding_gene	#N/A	NAD(P)-binding Rossmann-fold superfamily protein	26.5176	24.7322	25.2488	20.3836	18.2923	-0.10056	-0.0707354	-0.379541	-0.535713	_	_	_	_
AT1G10320	Chr1:3384164-3388373[-]	protein_coding_gene	#N/A	Zinc finger C-x8-C-x5-C-x3-H type family protein	3.65845	4.51332	4.41617	7.53321	5.49581	0.302956	0.271562	1.04203	0.587098	_	_	U	_
AT1G10330	Chr1:3388747-3390150[+]	protein_coding_gene	#N/A	Tetratricopeptide repeat (TPR)-like superfamily protein	1.45559	1.84229	1.54218	1.33179	0.44721	0.339894	0.0833666	-0.128237	-1.70256	_	_	_	D
AT1G10340	Chr1:3390322-3392571[-]	protein_coding_gene	#N/A	Ankyrin repeat family protein	4.19299	4.45108	2.94839	4.73145	4.65464	0.0861758	-0.508051	0.174303	0.15069	_	_	_	_
AT1G10350	Chr1:3393407-3395055[-]	protein_coding_gene	#N/A	DNAJ heat shock family protein	9.3934	10.5263	13.6214	9.23182	13.9495	0.164279	0.536155	-0.0250323	0.570494	_	_	_	_
AT1G10360	Chr1:3395558-3396849[-]	protein_coding_gene	ATGSTU18, GST29, GSTU18	glutathione S-transferase TAU 18	31.1972	23.8776	24.035	20.7191	36.8759	-0.385759	-0.37628	-0.590455	0.241262	_	_	_	_
AT1G10370	Chr1:3397081-3398358[-]	protein_coding_gene	GST30, ATGSTU17, GST30B, ERD9	Glutathione S-transferase family protein	68.7582	145.696	322.193	102.91	438.429	1.08336	2.22832	0.581779	2.67274	U	U	_	U
AT1G10380	Chr1:3400606-3402324[+]	protein_coding_gene	#N/A	Putative membrane lipoprotein	11.7244	10.9426	13.1519	6.96881	7.21685	-0.0995584	0.165757	-0.750529	-0.700072	_	_	_	_
AT1G10385	Chr1:3403224-3405856[+]	protein_coding_gene	#N/A	Vps51/Vps67 family (components of vesicular transport) protein	0.0718826	0.0446125	0.0876311	0.0582086	0.0502929	-0.688072	0.285764	-0.304363	-0.515202	_	_	_	_
AT1G10390	Chr1:3407024-3412843[-]	protein_coding_gene	#N/A	Nucleoporin autopeptidase	32.4475	36.2407	38.7092	36.7794	25.9547	0.159503	0.254569	0.180791	-0.322111	_	_	_	_
AT1G10400	Chr1:3414852-3416358[-]	protein_coding_gene	#N/A	UDP-Glycosyltransferase superfamily protein	0.698512	0.474569	0.294833	2.81693	4.72338	-0.557657	-1.24436	2.01175	2.75745	_	D	U	U
AT1G10410	Chr1:3416680-3419639[-]	protein_coding_gene	#N/A	Protein of unknown function (DUF1336)	28.5168	43.8985	52.4385	59.6127	54.6116	0.622359	0.878814	1.06381	0.937395	_	_	U	_
AT1G10417	Chr1:3424186-3427457[-]	protein_coding_gene	#N/A	Encodes protein with unknown function whose expression is repressed by inoculation with Agrobacterium tumerifaciens.	0.259088	0.354238	0.336455	0.592791	0.653968	0.451262	0.376959	1.19405	1.33574	_	_	U	U
AT1G10430	Chr1:3428478-3430633[-]	protein_coding_gene	PP2A-2	protein phosphatase 2A-2	32.1057	27.0995	22.8698	27.3677	34.0752	-0.244563	-0.489386	-0.230355	0.0858926	_	_	_	_
AT1G10450	Chr1:3431780-3438370[+]	protein_coding_gene	SNL6	SIN3-like 6	9.62044	11.5189	9.02791	13.9685	10.6099	0.259828	-0.0917107	0.538002	0.141236	_	_	_	_
AT1G10460	Chr1:3439322-3440320[-]	protein_coding_gene	GLP7	germin-like protein 7	0.784455	0.750262	0.484553	0.869153	0.478372	-0.0642954	-0.695025	0.147918	-0.713546	_	_	_	_
AT1G10470	Chr1:3442327-3443957[-]	protein_coding_gene	ARR4, MEE7, ATRR1, IBC7	response regulator 4	50.8084	58.5548	31.531	79.3072	56.4503	0.20472	-0.688296	0.642385	0.151914	_	_	_	_
AT1G10480	Chr1:3449691-3451226[+]	protein_coding_gene	ZFP5	zinc finger protein 5	1.89627	3.28276	5.70716	2.1689	2.31016	0.791742	1.5896	0.193798	0.284827	_	U	_	_
AT1G10490	Chr1:3453228-3460620[+]	protein_coding_gene	#N/A	Domain of unknown function (DUF1726) ;Putative ATPase (DUF699)	14.2373	14.1119	11.4073	15.4063	14.3287	-0.0127633	-0.319718	0.113845	0.00923214	_	_	_	_
AT1G10500	Chr1:3460000-3461485[-]	protein_coding_gene	ATCPISCA, CPISCA	chloroplast-localized ISCA-like protein	95.799	78.3012	93.5139	71.2678	89.2273	-0.290976	-0.0348298	-0.42676	-0.102525	_	_	_	_
AT1G10510	Chr1:3461635-3465786[+]	protein_coding_gene	emb2004	RNI-like superfamily protein	45.2497	42.7394	37.489	40.6127	33.0471	-0.0823416	-0.271441	-0.155977	-0.453384	_	_	_	_
AT1G10520	Chr1:3465964-3469248[+]	protein_coding_gene	#N/A	DNA polymerase lambda (POLL)	1.63956	1.42103	1.12194	1.62057	1.55493	-0.20637	-0.547309	-0.0168073	-0.0764586	_	_	_	_
AT1G10522	Chr1:3469580-3471488[+]	protein_coding_gene	#N/A	unknown protein; FUNCTIONS IN: molecular_function unknown; INVOLVED IN: biological_process unknown; LOCATED IN: chloroplast; EXPRESSED IN: 23 plant structures; EXPRESSED DURING: 13 growth stages; Has 24 Blast hits to 24 proteins in 8 species: Archae - 0; Bacteria - 0; Metazoa - 0; Fungi - 0; Plants - 24; Viruses - 0; Other Eukaryotes - 0 (source: NCBI BLink).	106.117	87.8382	70.1787	76.2843	67.9843	-0.272735	-0.596551	-0.476198	-0.642382	_	_	_	_
AT1G10530	Chr1:3471456-3472672[-]	protein_coding_gene	#N/A	unknown protein; FUNCTIONS IN: molecular_function unknown; INVOLVED IN: N-terminal protein myristoylation; BEST Arabidopsis thaliana protein match is: unknown protein (TAIR:AT1G60010.1); Has 143 Blast hits to 143 proteins in 14 species: Archae - 0; Bacteria - 0; Metazoa - 0; Fungi - 0; Plants - 143; Viruses - 0; Other Eukaryotes - 0 (source: NCBI BLink).	0.631723	0.934084	1.08479	0.877897	5.55125	0.564253	0.780042	0.474753	3.13543	_	_	_	U
AT1G10540	Chr1:3474864-3477927[-]	protein_coding_gene	ATNAT8, NAT8	nucleobase-ascorbate transporter 8	0.784399	0.939231	1.78964	0.832211	0.79702	0.259889	1.19	0.0853606	0.0230279	_	U	_	_
AT1G10550	Chr1:3479153-3480988[-]	protein_coding_gene	XTH33, XET	xyloglucan:xyloglucosyl transferase 33	9.85655	2.56786	3.73537	3.59253	2.14943	-1.94051	-1.39983	-1.45608	-2.19712	D	D	D	D
AT1G10560	Chr1:3484580-3486965[+]	protein_coding_gene	PUB18, ATPUB18	plant U-box 18	0.501163	2.46149	3.06294	1.84526	7.78059	2.29616	2.61154	1.88045	3.9565	U	U	U	U
AT1G10570	Chr1:3487584-3491277[+]	protein_coding_gene	OTS2, ULP1C	Cysteine proteinases superfamily protein	7.45615	9.48516	10.1328	12.5016	12.3672	0.347241	0.44253	0.745609	0.730015	_	_	_	_
AT1G10580	Chr1:3491281-3493737[-]	protein_coding_gene	#N/A	Transducin/WD40 repeat-like superfamily protein	20.2595	30.8053	27.0649	29.0567	30.7988	0.60458	0.417824	0.520272	0.604275	_	_	_	_
AT1G10585	Chr1:3493940-3495144[-]	protein_coding_gene	#N/A	basic helix-loop-helix (bHLH) DNA-binding superfamily protein	33.4612	27.6701	78.9423	14.2404	14.4429	-0.274161	1.23831	-1.2325	-1.21213	_	U	D	D
AT1G10590	Chr1:3502004-3503457[-]	protein_coding_gene	#N/A	Nucleic acid-binding, OB-fold-like protein	135.46	175.493	158.668	130.938	204.753	0.373547	0.228144	-0.048983	0.596018	_	_	_	_
AT1G10600	Chr1:3503704-3505502[+]	protein_coding_gene	AMSH2	associated molecule with the SH3 domain of STAM 2	26.1794	19.8876	18.5657	21.7415	21.6211	-0.396563	-0.495792	-0.26798	-0.275992	_	_	_	_
AT1G10610	Chr1:3506186-3509006[+]	protein_coding_gene	#N/A	basic helix-loop-helix (bHLH) DNA-binding superfamily protein	2.37414	2.48472	2.53826	3.06079	3.21862	0.065678	0.0964345	0.366498	0.439036	_	_	_	_
AT1G10630	Chr1:3512795-3514729[-]	protein_coding_gene	ATARFA1F, ARFA1F	ADP-ribosylation factor A1F	87.4057	103.821	114.527	75.5375	86.4027	0.248299	0.389888	-0.210534	-0.016651	_	_	_	_
AT1G10640	Chr1:3515365-3517888[-]	protein_coding_gene	#N/A	Pectin lyase-like superfamily protein	5.68358	9.22365	8.27835	2.42984	13.4748	0.698537	0.542543	-1.22594	1.24539	_	_	D	U
AT1G10650	Chr1:3524018-3526346[-]	protein_coding_gene	#N/A	SBP (S-ribonuclease binding protein) family protein	15.3859	14.42	15.8372	20.8869	24.6918	-0.0935376	0.0417084	0.440989	0.682423	_	_	_	_
AT1G10657	Chr1:3530467-3531842[+]	protein_coding_gene	#N/A	Plant protein 1589 of unknown function	4.34119	1.77576	1.17382	2.16065	3.71922	-1.28965	-1.88687	-1.00662	-0.22309	D	D	D	_
AT1G10660	Chr1:3532424-3535131[+]	protein_coding_gene	#N/A	unknown protein; LOCATED IN: endomembrane system; EXPRESSED IN: 24 plant structures; EXPRESSED DURING: 15 growth stages; BEST Arabidopsis thaliana protein match is: unknown protein (TAIR:AT5G62960.1); Has 155 Blast hits to 154 proteins in 22 species: Archae - 0; Bacteria - 0; Metazoa - 10; Fungi - 4; Plants - 139; Viruses - 0; Other Eukaryotes - 2 (source: NCBI BLink).	24.5666	22.724	24.5598	22.9298	24.8963	-0.112481	-0.000399391	-0.0994744	0.0192331	_	_	_	_
AT1G10670	Chr1:3535383-3538439[+]	protein_coding_gene	ACLA-1	ATP-citrate lyase A-1	123.494	131.2	171.571	123.957	141.377	0.0873268	0.474365	0.00539879	0.195106	_	_	_	_
AT1G10682	Chr1:3544991-3545471[-]	other_RNA	#N/A	other RNA	182.025	136.726	131.872	126.858	126.938	-0.412849	-0.464998	-0.520922	-0.520013	_	_	_	_
AT1G10690	Chr1:3549992-3550632[-]	protein_coding_gene	#N/A	unknown protein; BEST Arabidopsis thaliana protein match is: unknown protein (TAIR:AT1G60783.1); Has 59 Blast hits to 59 proteins in 9 species: Archae - 0; Bacteria - 0; Metazoa - 0; Fungi - 0; Plants - 59; Viruses - 0; Other Eukaryotes - 0 (source: NCBI BLink).	5.13416	2.3434	2.56873	3.46469	7.89837	-1.13152	-0.99907	-0.567401	0.621426	D	_	_	_
AT1G10700	Chr1:3554104-3556503[+]	protein_coding_gene	PRS3	phosphoribosyl pyrophosphate (PRPP) synthase 3	27.15	18.9094	20.4539	26.0656	27.9907	-0.521848	-0.408576	-0.0588051	0.0439954	_	_	_	_
AT1G10710	Chr1:3558358-3561634[+]	protein_coding_gene	PHS1	poor homologous synapsis 1	0.164745	0.294395	0.263136	0.260199	0.490799	0.83748	0.675541	0.659349	1.57484	_	_	_	U
AT1G10720	Chr1:3562952-3564759[+]	protein_coding_gene	#N/A	BSD domain-containing protein	16.2192	16.8206	19.7714	19.5773	14.0636	0.0525265	0.285712	0.271479	-0.205737	_	_	_	_
AT1G10730	Chr1:3565463-3567779[+]	protein_coding_gene	#N/A	Clathrin adaptor complexes medium subunit family protein	6.25828	6.56333	6.90909	8.14084	6.59009	0.0686617	0.142729	0.379411	0.0745318	_	_	_	_
AT1G10740	Chr1:3567905-3570838[-]	protein_coding_gene	#N/A	alpha/beta-Hydrolases superfamily protein	34.9749	36.3614	55.0429	16.7847	31.5242	0.0560878	0.654236	-1.05917	-0.14986	_	_	D	_
AT1G10750	Chr1:3574807-3578474[-]	protein_coding_gene	#N/A	Protein of Unknown Function (DUF239)	2.31617	1.69534	1.67535	1.90131	1.18204	-0.450164	-0.467276	-0.284746	-0.970456	_	_	_	_
AT1G10760	Chr1:3581034-3590928[-]	protein_coding_gene	SEX1, SOP1, SOP, GWD1, GWD	Pyruvate phosphate dikinase, PEP/pyruvate binding domain	17.4834	52.9322	171.543	36.0831	123.67	1.59816	3.29451	1.04534	2.82244	U	U	U	U
AT1G10770	Chr1:3591633-3592411[-]	protein_coding_gene	#N/A	Plant invertase/pectin methylesterase inhibitor superfamily protein	0.134984	0.130846	0.235885	0.30024	0.869266	-0.0449152	0.80525	1.15327	2.68692	_	_	U	U
AT1G10780	Chr1:3592746-3595077[-]	protein_coding_gene	#N/A	F-box/RNI-like superfamily protein	4.99249	6.14659	5.65834	4.91739	5.47891	0.300026	0.180619	-0.0218667	0.134129	_	_	_	_
AT1G10790	Chr1:3596360-3597847[+]	protein_coding_gene	#N/A	BEST Arabidopsis thaliana protein match is: hydroxyproline-rich glycoprotein family protein (TAIR:AT3G56590.2); Has 78 Blast hits to 78 proteins in 11 species: Archae - 0; Bacteria - 0; Metazoa - 0; Fungi - 0; Plants - 78; Viruses - 0; Other Eukaryotes - 0 (source: NCBI BLink).	0.561826	0.585218	0.519006	0.495671	0.384122	0.0588497	-0.11437	-0.180737	-0.548547	_	_	_	_
AT1G10800	Chr1:3598158-3598591[-]	protein_coding_gene	#N/A	unknown protein; FUNCTIONS IN: molecular_function unknown; INVOLVED IN: biological_process unknown; LOCATED IN: endomembrane system; EXPRESSED IN: inflorescence meristem, hypocotyl, root, flower; EXPRESSED DURING: petal differentiation and expansion stage; Has 23 Blast hits to 23 proteins in 9 species: Archae - 0; Bacteria - 0; Metazoa - 0; Fungi - 0; Plants - 22; Viruses - 0; Other Eukaryotes - …	1.54486	1.07348	1.16876	0.661956	0.72955	-0.525177	-0.402494	-1.22266	-1.08239	_	_	D	D
AT1G10810	Chr1:3599271-3600877[+]	protein_coding_gene	#N/A	NAD(P)-linked oxidoreductase superfamily protein	0.597298	0.455637	0.337711	0.635229	0.451539	-0.390558	-0.822643	0.0888244	-0.403592	_	_	_	_
AT1G10820	Chr1:3600910-3605076[-]	protein_coding_gene	#N/A	Protein of unknown function (DUF3755)	13.3851	11.5134	11.2502	12.7777	12.352	-0.217314	-0.250677	-0.0669997	-0.115883	_	_	_	_
AT1G10830	Chr1:3605576-3607493[-]	protein_coding_gene	Z-ISO, Z-ISO1.2	15-cis-zeta-carotene isomerase	33.8994	28.2756	27.7914	26.3921	27.5099	-0.261702	-0.286621	-0.361153	-0.301309	_	_	_	_
AT1G10840	Chr1:3607631-3610520[-]	protein_coding_gene	TIF3H1	translation initiation factor 3 subunit H1	151.592	124.071	104.174	119.681	141.232	-0.289028	-0.541198	-0.340999	-0.102127	_	_	_	_
AT1G10850	Chr1:3611747-3614613[+]	protein_coding_gene	#N/A	Leucine-rich repeat protein kinase family protein	11.6327	15.0596	11.9289	11.818	9.08619	0.372497	0.036275	0.0227999	-0.356438	_	_	_	_
AT1G10865	Chr1:3614513-3616159[-]	protein_coding_gene	#N/A	FUNCTIONS IN: molecular_function unknown; INVOLVED IN: biological_process unknown; LOCATED IN: cellular_component unknown; CONTAINS InterPro DOMAIN/s: Cytochrome c oxidase assembly protein PET191, N-terminal (InterPro:IPR018793); Has 30201 Blast hits to 17322 proteins in 780 species: Archae - 12; Bacteria - 1396; Metazoa - 17338; Fungi - 3422; Plants - 5037; Viruses - 0; Other Eukaryotes - 2996 (…	48.478	49.6174	49.3797	52.6777	58.0259	0.033516	0.0265879	0.119862	0.259367	_	_	_	_
AT1G10870	Chr1:3616610-3623758[-]	protein_coding_gene	AGD4	ARF-GAP domain 4	9.69372	10.9695	12.2059	10.9639	10.5256	0.178375	0.332456	0.177639	0.11878	_	_	_	_
AT1G10890	Chr1:3627726-3630765[+]	protein_coding_gene	#N/A	unknown protein; FUNCTIONS IN: molecular_function unknown; INVOLVED IN: biological_process unknown; LOCATED IN: chloroplast; EXPRESSED IN: petal, flower, leaf; EXPRESSED DURING: LP.04 four leaves visible, 4 anthesis, petal differentiation and expansion stage; BEST Arabidopsis thaliana protein match is: unknown protein (TAIR:AT5G13340.1); Has 11769 Blast hits to 8435 proteins in 698 species: Archa…	19.2401	21.4816	19.1614	29.4685	21.7206	0.158985	-0.00591332	0.615057	0.174948	_	_	_	_
AT1G10900	Chr1:3632234-3637141[-]	protein_coding_gene	#N/A	Phosphatidylinositol-4-phosphate 5-kinase family protein	12.8267	13.2215	11.5195	15.1836	17.9214	0.0437358	-0.155072	0.243364	0.482533	_	_	_	_
AT1G10910	Chr1:3639878-3644162[+]	protein_coding_gene	#N/A	Pentatricopeptide repeat (PPR) superfamily protein	21.5945	17.3762	14.5301	19.6484	15.6382	-0.313551	-0.571619	-0.136252	-0.465589	_	_	_	_
AT1G10920	Chr1:3644420-3647768[-]	protein_coding_gene	LOV1	NB-ARC domain-containing disease resistance protein	2.90837	3.49181	2.94668	7.35444	4.85067	0.263763	0.0188795	1.3384	0.737971	_	_	U	_
AT1G10930	Chr1:3647894-3655590[-]	protein_coding_gene	ATSGS1, RECQ4A, ATRECQ4A	DNA helicase (RECQl4A)	4.68837	6.30633	7.44721	6.44449	5.06648	0.427713	0.667612	0.458979	0.111897	_	_	_	_
AT1G10940	Chr1:3655777-3658608[-]	protein_coding_gene	#N/A	Protein kinase superfamily protein	43.4966	43.5216	46.3274	52.2546	42.852	0.000828961	0.0909631	0.264655	-0.0215401	_	_	_	_
AT1G10950	Chr1:3659209-3663984[+]	protein_coding_gene	TMN1, AtTMN1	transmembrane nine 1	85.3211	100.317	105.421	87.1109	74.7544	0.233592	0.305188	0.0299507	-0.190744	_	_	_	_
AT1G10960	Chr1:3664386-3665039[+]	protein_coding_gene	ATFD1, FD1	ferredoxin 1	784.805	525.603	402.458	350.511	316.369	-0.578361	-0.963496	-1.16287	-1.31073	_	_	D	D
AT1G10970	Chr1:3665087-3667139[-]	protein_coding_gene	ZIP4, ATZIP4	zinc transporter 4 precursor	4.56711	5.45594	4.9349	4.1582	2.87436	0.256546	0.111739	-0.135322	-0.668039	_	_	_	_
AT1G10980	Chr1:3667248-3669902[-]	protein_coding_gene	#N/A	Lung seven transmembrane receptor family protein	0.152329	0.164339	0.111611	0.131832	0.13381	0.109477	-0.448677	-0.208475	-0.186992	_	_	_	_
AT1G10990	Chr1:3670278-3671187[-]	protein_coding_gene	#N/A	unknown protein; Has 6 Blast hits to 6 proteins in 2 species: Archae - 0; Bacteria - 0; Metazoa - 0; Fungi - 0; Plants - 6; Viruses - 0; Other Eukaryotes - 0 (source: NCBI BLink).	5.75992	5.19627	2.18507	6.80002	2.18404	-0.148572	-1.39837	0.23949	-1.39905	_	D	_	D
AT1G11000	Chr1:3671756-3675979[-]	protein_coding_gene	MLO4, ATMLO4	Seven transmembrane MLO family protein	6.27513	5.68753	3.16223	10.557	6.96302	-0.141843	-0.988701	0.750482	0.150068	_	_	_	_
AT1G11020	Chr1:3676691-3678524[+]	protein_coding_gene	#N/A	RING/FYVE/PHD zinc finger superfamily protein	12.9061	11.7862	13.2802	12.0878	14.0886	-0.130954	0.0412237	-0.0945013	0.126475	_	_	_	_
AT1G11050	Chr1:3681888-3684169[+]	protein_coding_gene	#N/A	Protein kinase superfamily protein	13.7194	4.4768	5.50534	12.6334	10.9524	-1.61568	-1.31731	-0.118974	-0.32497	D	D	_	_
AT1G11060	Chr1:3684568-3689847[+]	protein_coding_gene	#N/A	WAPL (Wings apart-like protein regulation of heterochromatin) protein	5.90599	5.54405	5.86071	6.23859	5.51947	-0.0912385	-0.0111034	0.079041	-0.097649	_	_	_	_
AT1G11070	Chr1:3690212-3693648[-]	protein_coding_gene	#N/A	BEST Arabidopsis thaliana protein match is: Hydroxyproline-rich glycoprotein family protein (TAIR:AT1G61080.1); Has 579 Blast hits to 567 proteins in 152 species: Archae - 0; Bacteria - 68; Metazoa - 159; Fungi - 113; Plants - 172; Viruses - 0; Other Eukaryotes - 67 (source: NCBI BLink).	0.286172	0.451116	0.231205	0.356433	0.220935	0.656598	-0.307698	0.316738	-0.373246	_	_	_	_
AT1G11080	Chr1:3694672-3698013[-]	protein_coding_gene	scpl31	serine carboxypeptidase-like 31	4.923	2.46273	2.71849	3.00349	1.2132	-0.999276	-0.85673	-0.712896	-2.02071	_	_	_	D
AT1G11090	Chr1:3702608-3703779[+]	protein_coding_gene	#N/A	alpha/beta-Hydrolases superfamily protein	11.6134	13.4851	14.2635	12.356	11.3322	0.215576	0.296537	0.0894213	-0.0353624	_	_	_	_
AT1G11100	Chr1:3703672-3709302[-]	protein_coding_gene	#N/A	SNF2 domain-containing protein / helicase domain-containing protein / zinc finger protein-related	0.947947	0.538114	0.581905	0.65723	0.630646	-0.816883	-0.704013	-0.528401	-0.587968	_	_	_	_
AT1G11112	Chr1:3712999-3713735[-]	protein_coding_gene	#N/A	unknown protein; FUNCTIONS IN: molecular_function unknown; INVOLVED IN: biological_process unknown; LOCATED IN: cellular_component unknown; Has 30201 Blast hits to 17322 proteins in 780 species: Archae - 12; Bacteria - 1396; Metazoa - 17338; Fungi - 3422; Plants - 5037; Viruses - 0; Other Eukaryotes - 2996 (source: NCBI BLink).	1.05004	0.958297	0.596977	0.936855	0.978726	-0.131898	-0.814687	-0.164545	-0.101466	_	_	_	_
AT1G11120	Chr1:3715184-3717320[+]	protein_coding_gene	#N/A	unknown protein; FUNCTIONS IN: molecular_function unknown; INVOLVED IN: biological_process unknown; LOCATED IN: cellular_component unknown; EXPRESSED IN: 10 plant structures; EXPRESSED DURING: 4 anthesis, F mature embryo stage, petal differentiation and expansion stage, E expanded cotyledon stage, D bilateral stage; BEST Arabidopsis thaliana protein match is: unknown protein (TAIR:AT4G28170.1); H…	6.00418	3.51711	2.2256	14.3359	10.9316	-0.771575	-1.43177	1.25559	0.864464	_	D	U	_
AT1G11125	Chr1:3718783-3719711[+]	protein_coding_gene	#N/A	unknown protein; BEST Arabidopsis thaliana protein match is: unknown protein (TAIR:AT1G61170.1).	1.09351	0.830319	0.562492	0.871316	0.858157	-0.397225	-0.959049	-0.327695	-0.349649	_	_	_	_
AT1G11130	Chr1:3722857-3727450[+]	protein_coding_gene	SUB, SCM, SRF9	Leucine-rich repeat protein kinase family protein	8.44176	7.7599	6.71362	7.56693	7.85168	-0.121506	-0.330452	-0.157836	-0.104542	_	_	_	_
AT1G11150	Chr1:3728971-3731624[+]	transposable_element_gene	#N/A	transposable element gene	1.57008	2.00102	2.03725	1.70735	0.626942	0.349896	0.375783	0.12092	-1.32442	_	_	_	D
AT1G11160	Chr1:3733139-3739842[+]	protein_coding_gene	#N/A	Transducin/WD40 repeat-like superfamily protein	0.775589	0.679526	0.531411	0.804696	0.613796	-0.190761	-0.545456	0.0531508	-0.337528	_	_	_	_
AT1G11170	Chr1:3740765-3744675[+]	protein_coding_gene	#N/A	Protein of unknown function (DUF707)	1.88991	2.86024	9.50422	2.17525	3.29644	0.597816	2.33024	0.202863	0.802588	_	U	_	_
AT1G11175	Chr1:3744858-3745655[+]	other_RNA	#N/A	other RNA	16.9807	10.0897	13.4895	9.57357	15.4184	-0.751012	-0.332059	-0.826766	-0.139243	_	_	_	_
AT1G11180	Chr1:3745774-3748521[+]	protein_coding_gene	#N/A	Secretory carrier membrane protein (SCAMP) family protein	13.7787	11.8305	10.2069	13.7319	10.8111	-0.219929	-0.432895	-0.00490852	-0.349926	_	_	_	_
AT1G11185	Chr1:3749510-3750035[+]	other_RNA	#N/A	other RNA	19.301	3.11902	2.44024	15.2757	20.6581	-2.62951	-2.98358	-0.337437	0.0980319	D	D	_	_
AT1G11190	Chr1:3750066-3752780[-]	protein_coding_gene	BFN1, ENDO1	bifunctional nuclease i	2.92356	3.11159	5.98763	2.02269	2.19897	0.0899255	1.03426	-0.531449	-0.410897	_	U	_	_
AT1G11200	Chr1:3753365-3755641[+]	protein_coding_gene	#N/A	Protein of unknown function (DUF300)	20.4234	23.0961	26.7618	22.3576	26.2512	0.177426	0.389952	0.130542	0.36216	_	_	_	_
AT1G11210	Chr1:3755677-3756998[-]	protein_coding_gene	#N/A	Protein of unknown function (DUF761)	2.67687	51.919	63.5911	29.257	54.2047	4.27764	4.5702	3.45016	4.33979	U	U	U	U
AT1G11220	Chr1:3759862-3761165[-]	protein_coding_gene	#N/A	Protein of unknown function (DUF761)	1.97134	2.18858	1.74283	1.71751	1.75026	0.150818	-0.177744	-0.198857	-0.171606	_	_	_	_
AT1G11230	Chr1:3763268-3764483[-]	protein_coding_gene	#N/A	Protein of unknown function (DUF761)	0	0	0.227617	0	0	0	14.4744	0	0	_	U	_	_
AT1G11240	Chr1:3766754-3768294[-]	protein_coding_gene	#N/A	CONTAINS InterPro DOMAIN/s: Nucleolar protein 12 (InterPro:IPR019186); Has 2484 Blast hits to 1934 proteins in 262 species: Archae - 0; Bacteria - 90; Metazoa - 921; Fungi - 378; Plants - 144; Viruses - 18; Other Eukaryotes - 933 (source: NCBI BLink).	36.8595	34.1918	30.871	36.303	34.9075	-0.108386	-0.255784	-0.0219477	-0.0784994	_	_	_	_
AT1G11250	Chr1:3768724-3769706[+]	protein_coding_gene	SYP125, ATSYP125	syntaxin of plants 125	0.354674	0.135359	0.25475	0.083749	0.0562806	-1.38964	-0.477395	-2.08222	-2.65557	D	_	D	D
AT1G11260	Chr1:3777328-3780337[+]	protein_coding_gene	STP1, ATSTP1	sugar transporter 1	128.259	28.427	45.7214	81.684	54.6751	-2.17373	-1.48812	-0.650935	-1.2301	D	D	_	D
AT1G11270	Chr1:3780429-3786990[-]	protein_coding_gene	#N/A	F-box and associated interaction domains-containing protein	5.02587	4.96743	3.91817	4.60035	4.33096	-0.0168737	-0.359193	-0.127629	-0.214686	_	_	_	_
AT1G11280	Chr1:3787334-3790876[-]	protein_coding_gene	#N/A	S-locus lectin protein kinase family protein	12.8644	17.2925	15.3995	19.6275	16.9406	0.426762	0.259499	0.609492	0.397101	_	_	_	_
AT1G11290	Chr1:3791454-3793883[-]	protein_coding_gene	CRR22	Pentatricopeptide repeat (PPR) superfamily protein	3.16068	2.73556	3.24211	2.77495	2.2961	-0.208398	0.0366979	-0.187773	-0.461048	_	_	_	_
AT1G11300	Chr1:3794238-3800719[+]	protein_coding_gene	#N/A	protein serine/threonine kinases;protein kinases;ATP binding;sugar binding;kinases;carbohydrate binding	1.61268	1.99884	1.98946	2.76425	3.00583	0.309701	0.302915	0.777424	0.898299	_	_	_	_
AT1G11310	Chr1:3800738-3804185[-]	protein_coding_gene	MLO2, ATMLO2, PMR2	Seven transmembrane MLO family protein	63.6243	51.5834	62.2749	87.3905	71.571	-0.302671	-0.0309271	0.457899	0.169797	_	_	_	_
AT1G11320	Chr1:3807128-3808875[+]	protein_coding_gene	#N/A	unknown protein; FUNCTIONS IN: molecular_function unknown; INVOLVED IN: biological_process unknown; LOCATED IN: mitochondrion, plastid; EXPRESSED IN: 7 plant structures; EXPRESSED DURING: C globular stage, F mature embryo stage, petal differentiation and expansion stage, E expanded cotyledon stage, D bilateral stage; Has 46 Blast hits to 46 proteins in 14 species: Archae - 0; Bacteria - 2; Metazo…	3.87892	3.92203	3.43595	4.04338	2.70961	0.0159455	-0.174945	0.0599066	-0.517568	_	_	_	_
AT1G11330	Chr1:3810093-3813607[+]	protein_coding_gene	#N/A	S-locus lectin protein kinase family protein	21.2839	22.9981	22.6263	26.8806	22.8386	0.111752	0.0882381	0.336803	0.101712	_	_	_	_
AT1G11340	Chr1:3814116-3817420[-]	protein_coding_gene	#N/A	S-locus lectin protein kinase family protein	1.16128	0.307251	0.288802	1.41671	1.16523	-1.91819	-2.00753	0.286826	0.00489884	D	D	_	_
AT1G11350	Chr1:3817591-3820805[-]	protein_coding_gene	CBRLK1, SD1-13, RKS2	S-domain-1 13	11.3673	7.53701	5.69112	14.88	8.38628	-0.592825	-0.998104	0.388485	-0.438786	_	_	_	_
AT1G11360	Chr1:3821443-3823088[-]	protein_coding_gene	#N/A	Adenine nucleotide alpha hydrolases-like superfamily protein	24.5278	19.6474	21.7913	18.354	16.9379	-0.320079	-0.170665	-0.418323	-0.534163	_	_	_	_
AT1G11362	Chr1:3824510-3825196[-]	protein_coding_gene	#N/A	Plant invertase/pectin methylesterase inhibitor superfamily protein	0.0979316	0.139166	0.22405	0.406789	0.199356	0.506917	1.19389	2.05432	1.02543	_	_	U	_
AT1G11380	Chr1:3832623-3834191[+]	protein_coding_gene	#N/A	PLAC8 family protein	22.5036	6.95735	10.4753	10.1182	8.04471	-1.69354	-1.10316	-1.1532	-1.48404	D	D	D	D
AT1G11390	Chr1:3834459-3837629[-]	protein_coding_gene	#N/A	Protein kinase superfamily protein	10.0942	11.644	12.9678	11.8088	11.4897	0.20606	0.361407	0.226336	0.186814	_	_	_	_
AT1G11400	Chr1:3837821-3840207[+]	protein_coding_gene	PYM	partner of Y14-MAGO	23.646	18.9807	21.9173	19.3352	24.9377	-0.317063	-0.109526	-0.290366	0.0767322	_	_	_	_
AT1G11410	Chr1:3841286-3844432[+]	protein_coding_gene	#N/A	S-locus lectin protein kinase family protein	5.76267	6.20216	6.30183	5.322	11.0986	0.106033	0.129033	-0.114769	0.945567	_	_	_	_
AT1G11420	Chr1:3844581-3846872[-]	protein_coding_gene	ATDUF2, DUF2	DOMAIN OF UNKNOWN FUNCTION 724 2	1.47452	1.60119	1.1517	1.66411	0.983363	0.118898	-0.356478	0.174504	-0.584445	_	_	_	_
AT1G11430	Chr1:3847243-3849162[+]	protein_coding_gene	#N/A	plastid developmental protein DAG, putative	226.645	199.311	162.834	163.414	163.072	-0.185413	-0.477032	-0.471903	-0.474925	_	_	_	_
AT1G11440	Chr1:3849360-3850662[+]	protein_coding_gene	#N/A	BEST Arabidopsis thaliana protein match is: glycine-rich protein (TAIR:AT3G29075.1); Has 19337 Blast hits to 8589 proteins in 488 species: Archae - 26; Bacteria - 641; Metazoa - 7852; Fungi - 2167; Plants - 955; Viruses - 616; Other Eukaryotes - 7080 (source: NCBI BLink).	9.96846	10.1214	10.2544	10.6652	10.0738	0.0219663	0.0408005	0.0974684	0.0151654	_	_	_	_
AT1G11450	Chr1:3853243-3855385[+]	protein_coding_gene	#N/A	nodulin MtN21 /EamA-like transporter family protein	7.61281	3.98022	2.05107	6.09427	4.91145	-0.935579	-1.89205	-0.320975	-0.632279	_	D	_	_
AT1G11460	Chr1:3857005-3859268[+]	protein_coding_gene	#N/A	nodulin MtN21 /EamA-like transporter family protein	0.253769	0.224852	0.199526	0.339762	0.259795	-0.174533	-0.346924	0.420994	0.0338565	_	_	_	_
AT1G11475	Chr1:3862399-3864030[+]	protein_coding_gene	NRPB10, NRPD10, NRPE10	RNA polymerases N / 8 kDa subunit	99.7819	96.6879	77.9393	71.5813	112.67	-0.0454428	-0.356427	-0.479195	0.175253	_	_	_	_
AT1G11480	Chr1:3864153-3866969[-]	protein_coding_gene	#N/A	eukaryotic translation initiation factor-related	27.7355	30.9883	32.0659	33.3664	33.7242	0.15999	0.209306	0.266662	0.28205	_	_	_	_
AT1G11482	Chr1:3867405-3868870[-]	pseudogene	#N/A	unknown pseudogene	0.0630375	0.0457221	0.0570958	0.122066	0.0612179	-0.463232	-0.142802	0.953269	-0.04225	_	_	_	_
AT1G11490	Chr1:3868884-3870065[-]	protein_coding_gene	#N/A	zinc finger (C2H2 type) family protein	0.205816	0.21704	0.0949186	0.184475	0.108809	0.0766022	-1.11651	-0.157922	-0.919495	_	D	_	_
AT1G11500	Chr1:3870833-3871570[+]	protein_coding_gene	#N/A	Protein of unknown function (DUF1218)	0.804964	0.565456	0.494207	0.498762	0.835059	-0.509502	-0.703798	-0.690562	0.0529532	_	_	_	_
AT1G11530	Chr1:3874437-3875484[+]	protein_coding_gene	ATCXXS1, CXXS1	C-terminal cysteine residue is changed to a serine 1	35.1741	22.0047	39.4718	29.8232	33.9185	-0.676702	0.166309	-0.238078	-0.0524411	_	_	_	_
AT1G11540	Chr1:3875442-3877155[-]	protein_coding_gene	#N/A	Sulfite exporter TauE/SafE family protein	3.53146	1.77005	1.1569	1.3887	1.85752	-0.996471	-1.60999	-1.34652	-0.926883	_	D	D	_
AT1G11545	Chr1:3878550-3880361[-]	protein_coding_gene	XTH8	xyloglucan endotransglucosylase/hydrolase 8	42.126	37.8724	28.3291	16.8526	13.1206	-0.153564	-0.572426	-1.32174	-1.68288	_	_	D	D
AT1G11570	Chr1:3883280-3883956[+]	protein_coding_gene	NTL	NTF2-like	2.96954	2.94793	3.13787	2.55174	2.99778	-0.0105372	0.0795459	-0.218757	0.013655	_	_	_	_
AT1G11572	Chr1:3884356-3884952[+]	protein_coding_gene	#N/A	Plant thionin family protein	0.091465	0.0479395	0.0277517	0.209553	0.0447881	-0.931862	-1.72028	1.19593	-1.02994	_	_	_	_
AT1G11580	Chr1:3888690-3890811[+]	protein_coding_gene	ATPMEPCRA, PMEPCRA	methylesterase PCR A	63.8345	49.8901	16.4429	85.9554	79.6998	-0.355583	-1.95687	0.429252	0.32024	_	D	_	_
AT1G11592	Chr1:3895179-3896934[-]	other_RNA	#N/A	other RNA	13.7029	13.0641	10.0347	12.2719	8.77668	-0.0688735	-0.449483	-0.159122	-0.642733	_	_	_	_
AT1G11600	Chr1:3902012-3903782[+]	protein_coding_gene	CYP77B1	cytochrome P450, family 77, subfamily B, polypeptide 1	6.2965	9.61676	11.8167	9.63938	9.95025	0.611	0.908204	0.614389	0.660182	_	_	_	_
AT1G11630	Chr1:3912902-3914407[-]	protein_coding_gene	#N/A	Tetratricopeptide repeat (TPR)-like superfamily protein	11.0351	9.44271	8.67244	8.99864	7.66813	-0.224827	-0.347589	-0.294321	-0.525152	_	_	_	_
AT1G11650	Chr1:3914774-3918176[+]	protein_coding_gene	ATRBP45B, RBP45B	RNA-binding (RRM/RBD/RNP motifs) family protein	204.378	212.374	202.415	194.75	191.631	0.0553672	-0.0139237	-0.0696166	-0.0929089	_	_	_	_
AT1G11655	Chr1:3919272-3919774[+]	protein_coding_gene	#N/A	unknown protein; BEST Arabidopsis thaliana protein match is: unknown protein (TAIR:AT4G21902.1); Has 22 Blast hits to 22 proteins in 6 species: Archae - 0; Bacteria - 0; Metazoa - 0; Fungi - 0; Plants - 22; Viruses - 0; Other Eukaryotes - 0 (source: NCBI BLink).	0.840371	1.00213	0.491061	0.368065	0.724177	0.253969	-0.775112	-1.19104	-0.214681	_	_	D	_
AT1G11660	Chr1:3920543-3924555[+]	protein_coding_gene	#N/A	heat shock protein 70 (Hsp 70) family protein	21.407	23.1517	25.0058	24.5907	19.8232	0.113035	0.22418	0.20003	-0.110893	_	_	_	_
AT1G11670	Chr1:3928162-3931576[-]	protein_coding_gene	#N/A	MATE efflux family protein	13.932	7.9952	5.85006	61.9365	36.7025	-0.801196	-1.25188	2.15239	1.39748	_	D	U	U
AT1G11680	Chr1:3938501-3940754[+]	protein_coding_gene	CYP51G1, EMB1738, CYP51A2, CYP51	CYTOCHROME P450 51G1	101.158	105.984	101.602	89.0543	75.8494	0.0672361	0.00631838	-0.183853	-0.415401	_	_	_	_
AT1G11700	Chr1:3945737-3946613[+]	protein_coding_gene	#N/A	Protein of unknown function, DUF584	8.46601	11.3195	12.5767	5.88485	4.54225	0.419056	0.570999	-0.524676	-0.898274	_	_	_	_
AT1G11710	Chr1:3948714-3951359[+]	protein_coding_gene	#N/A	Pentatricopeptide repeat (PPR) superfamily protein	1.58216	2.55106	1.71579	2.25155	2.21462	0.689198	0.116977	0.50902	0.485161	_	_	_	_
AT1G11720	Chr1:3951553-3957044[+]	protein_coding_gene	SS3	starch synthase 3	12.971	13.8611	15.0445	15.7442	16.2538	0.095752	0.213946	0.279531	0.325487	_	_	_	_
AT1G11730	Chr1:3957473-3960113[+]	protein_coding_gene	#N/A	Galactosyltransferase family protein	1.14475	0.715325	0.809061	1.35896	1.02241	-0.678354	-0.500707	0.247468	-0.163057	_	_	_	_
AT1G11740	Chr1:3963054-3966824[-]	protein_coding_gene	#N/A	ankyrin repeat family protein	1.45181	0.786116	0.528905	0.40867	0.201453	-0.88503	-1.45675	-1.82882	-2.84928	_	D	D	D
AT1G11750	Chr1:3967476-3969877[+]	protein_coding_gene	CLPP6	CLP protease proteolytic subunit 6	128.813	114.347	112.359	108.834	121.98	-0.17186	-0.197162	-0.243149	-0.0786336	_	_	_	_
AT1G11755	Chr1:3969681-3971840[-]	protein_coding_gene	LEW1	Undecaprenyl pyrophosphate synthetase family protein	15.0978	13.3098	12.3206	14.1635	14.6644	-0.181849	-0.293266	-0.0921605	-0.0420203	_	_	_	_
AT1G11760	Chr1:3972032-3973286[-]	protein_coding_gene	MED32	MED32; Has 41 Blast hits to 40 proteins in 14 species: Archae - 0; Bacteria - 0; Metazoa - 0; Fungi - 0; Plants - 41; Viruses - 0; Other Eukaryotes - 0 (source: NCBI BLink).	10.8563	8.80191	8.83058	8.97098	9.95836	-0.302644	-0.297952	-0.275195	-0.124552	_	_	_	_
AT1G11780	Chr1:3976839-3979195[-]	protein_coding_gene	#N/A	oxidoreductase, 2OG-Fe(II) oxygenase family protein	10.8116	10.0196	8.40174	9.34612	11.7409	-0.109755	-0.36382	-0.21014	0.118963	_	_	_	_
AT1G11785	Chr1:3979862-3980956[-]	protein_coding_gene	#N/A	unknown protein; FUNCTIONS IN: molecular_function unknown; INVOLVED IN: biological_process unknown; LOCATED IN: cellular_component unknown; Has 2 Blast hits to 2 proteins in 1 species: Archae - 0; Bacteria - 0; Metazoa - 0; Fungi - 0; Plants - 2; Viruses - 0; Other Eukaryotes - 0 (source: NCBI BLink).	0.357258	0.476959	0.787382	0.290111	0.141935	0.416889	1.14008	-0.300352	-1.33167	_	U	_	D
AT1G11790	Chr1:3981248-3985215[+]	protein_coding_gene	ADT1	arogenate dehydratase 1	20.7272	25.7746	32.5489	23.2101	40.3824	0.314425	0.651083	0.163227	0.962201	_	_	_	_
AT1G11800	Chr1:3985225-3987290[-]	protein_coding_gene	#N/A	endonuclease/exonuclease/phosphatase family protein	7.69217	7.31557	6.9065	7.28271	6.02366	-0.0724203	-0.155436	-0.0789151	-0.35275	_	_	_	_
AT1G11820	Chr1:3991027-3993598[-]	protein_coding_gene	#N/A	O-Glycosyl hydrolases family 17 protein	40.4254	42.5145	28.9978	39.5295	23.2561	0.0726929	-0.479318	-0.0323323	-0.797653	_	_	_	_
AT1G11840	Chr1:3995169-3997907[+]	protein_coding_gene	GLX1	glyoxalase I homolog	262.097	277.509	371.616	226.468	363.936	0.0824337	0.503712	-0.210794	0.473584	_	_	_	_
AT1G11850	Chr1:3999199-3999876[+]	protein_coding_gene	#N/A	unknown protein; FUNCTIONS IN: molecular_function unknown; INVOLVED IN: biological_process unknown; LOCATED IN: endomembrane system; EXPRESSED IN: 19 plant structures; EXPRESSED DURING: 12 growth stages; Has 52145 Blast hits to 9983 proteins in 837 species: Archae - 70; Bacteria - 23777; Metazoa - 15204; Fungi - 1872; Plants - 6370; Viruses - 647; Other Eukaryotes - 4205 (source: NCBI BLink).	27.5642	26.0189	23.1552	15.6949	19.1837	-0.0832357	-0.251459	-0.812499	-0.522914	_	_	_	_
AT1G11860	Chr1:4001113-4003442[+]	protein_coding_gene	#N/A	Glycine cleavage T-protein family	386.292	305.358	246.995	261.115	241.276	-0.33919	-0.64521	-0.565006	-0.679007	_	_	_	_
AT1G11870	Chr1:4003846-4006739[+]	protein_coding_gene	ATSRS, OVA7, SRS	Seryl-tRNA synthetase	26.0615	23.9408	23.0142	22.8146	21.838	-0.122449	-0.179396	-0.191963	-0.255079	_	_	_	_
AT1G11880	Chr1:4007705-4010433[-]	protein_coding_gene	#N/A	transferases, transferring hexosyl groups	4.3159	4.28965	4.45225	4.32649	3.32929	-0.00880148	0.0448731	0.00353562	-0.374446	_	_	_	_
AT1G11890	Chr1:4010779-4013125[+]	protein_coding_gene	SEC22, ATSEC22	Synaptobrevin family protein	52.7782	53.3625	56.4938	54.3858	60.629	0.0158841	0.0981504	0.0432879	0.200066	_	_	_	_
AT1G11900	Chr1:4013121-4014681[-]	protein_coding_gene	#N/A	Tetratricopeptide repeat (TPR)-like superfamily protein	3.06739	3.38901	3.50095	3.043	2.18872	0.143852	0.190734	-0.0115172	-0.486922	_	_	_	_
AT1G11905	Chr1:4014847-4016540[+]	protein_coding_gene	#N/A	B-cell receptor-associated protein 31-like	11.5861	12.488	13.6395	11.4079	11.8349	0.108147	0.235396	-0.0223618	0.0306525	_	_	_	_
AT1G11910	Chr1:4016784-4020983[-]	protein_coding_gene	APA1, ATAPA1	aspartic proteinase A1	274.191	330.752	426.231	290.271	315.336	0.270569	0.636454	0.0822192	0.201709	_	_	_	_
AT1G11915	Chr1:4021825-4023292[+]	protein_coding_gene	#N/A	unknown protein; FUNCTIONS IN: molecular_function unknown; INVOLVED IN: biological_process unknown; LOCATED IN: endomembrane system; EXPRESSED IN: root; BEST Arabidopsis thaliana protein match is: unknown protein (TAIR:AT3G17350.1); Has 261 Blast hits to 261 proteins in 13 species: Archae - 0; Bacteria - 0; Metazoa - 0; Fungi - 0; Plants - 261; Viruses - 0; Other Eukaryotes - 0 (source: NCBI BLin…	0.597208	0.792128	0.686449	0.962277	0.690995	0.407494	0.200916	0.68821	0.210439	_	_	_	_
AT1G11920	Chr1:4023667-4025097[-]	protein_coding_gene	#N/A	Pectin lyase-like superfamily protein	0.947142	0.426494	0.582268	0.110803	0.119548	-1.15104	-0.701888	-3.09547	-2.98589	D	_	D	D
AT1G11925	Chr1:4025930-4026732[-]	protein_coding_gene	#N/A	Stigma-specific Stig1 family protein	0	0.0185696	0.0563604	0.240701	0.323733	10.8595	12.4607	14.555	14.9826	_	U	U	U
AT1G11930	Chr1:4028692-4030584[+]	protein_coding_gene	#N/A	Predicted pyridoxal phosphate-dependent enzyme, YBL036C type	37.8153	39.4089	43.7684	40.8981	33.9902	0.0595514	0.21092	0.113064	-0.153851	_	_	_	_
AT1G11940	Chr1:4031574-4034078[-]	protein_coding_gene	#N/A	Core-2/I-branching beta-1,6-N-acetylglucosaminyltransferase family protein	5.21079	5.33412	8.02731	6.11755	4.88272	0.0337481	0.623414	0.231451	-0.0938169	_	_	_	_
AT1G11950	Chr1:4034587-4038758[-]	protein_coding_gene	#N/A	Transcription factor jumonji (jmjC) domain-containing protein	2.43213	2.99133	3.0727	6.007	4.74389	0.298566	0.337285	1.30442	0.963847	_	_	U	_
AT1G11960	Chr1:4039711-4043880[-]	protein_coding_gene	#N/A	ERD (early-responsive to dehydration stress) family protein	6.53522	12.2669	8.2795	51.9886	26.496	0.908462	0.341307	2.99189	2.01947	_	_	U	U
AT1G11990	Chr1:4046246-4049060[-]	protein_coding_gene	#N/A	O-fucosyltransferase family protein	0.0990853	0.0691791	0.0400913	0.0574233	0.147389	-0.518272	-1.30517	-0.786929	0.572838	_	D	_	_
AT1G12000	Chr1:4049896-4053835[-]	protein_coding_gene	#N/A	Phosphofructokinase family protein	54.8795	67.2436	69.8428	52.8604	51.274	0.29313	0.347844	-0.05408	-0.0980399	_	_	_	_
AT1G12010	Chr1:4056207-4057933[+]	protein_coding_gene	#N/A	2-oxoglutarate (2OG) and Fe(II)-dependent oxygenase superfamily protein	8.71394	7.10977	5.36464	8.36803	10.5297	-0.293522	-0.699843	-0.0584371	0.273067	_	_	_	_
AT1G12013	Chr1:4058287-4058416[+]	snoRNA	SNOR111	SNOR111; snoRNA	0	3.78748	16.4814	13.2349	21.2844	18.5309	20.6524	20.3359	21.0214	_	_	_	U
AT1G12015	Chr1:4058487-4058576[+]	snoRNA	#N/A	snoRNA	0	0	0	0	0	0	0	0	0	_	_	_	_
AT1G12020	Chr1:4062462-4063337[-]	protein_coding_gene	#N/A	unknown protein; BEST Arabidopsis thaliana protein match is: unknown protein (TAIR:AT1G62422.1); Has 89 Blast hits to 88 proteins in 16 species: Archae - 0; Bacteria - 0; Metazoa - 0; Fungi - 0; Plants - 87; Viruses - 0; Other Eukaryotes - 2 (source: NCBI BLink).	30.193	11.8838	6.39978	11.8609	14.3685	-1.34522	-2.23812	-1.348	-1.0713	D	D	D	D
AT1G12030	Chr1:4064667-4066341[-]	protein_coding_gene	#N/A	Protein of unknown function (DUF506)	5.56651	3.57479	1.53303	1.04296	2.9206	-0.638913	-1.86038	-2.41608	-0.930506	_	D	D	_
AT1G12040	Chr1:4070124-4072567[+]	protein_coding_gene	LRX1	leucine-rich repeat/extensin 1	5.63288	8.5876	7.71473	3.30194	1.63099	0.608381	0.453742	-0.770557	-1.78812	_	_	_	D
AT1G12050	Chr1:4072752-4076207[+]	protein_coding_gene	#N/A	fumarylacetoacetase, putative	33.8915	33.3586	53.6853	31.6492	32.9649	-0.0228647	0.663603	-0.0987544	-0.0399928	_	_	_	_
AT1G12060	Chr1:4076334-4076981[+]	protein_coding_gene	ATBAG5, BAG5	BCL-2-associated athanogene 5	6.59899	3.62113	5.1162	2.03292	3.16698	-0.865803	-0.367172	-1.69869	-1.05914	_	_	D	D
AT1G12070	Chr1:4078913-4080106[-]	protein_coding_gene	#N/A	Immunoglobulin E-set superfamily protein	1.09599	0.719179	0.787552	0.492519	0.337204	-0.607805	-0.476782	-1.15397	-1.70051	_	_	D	D
AT1G12080	Chr1:4084162-4085045[+]	protein_coding_gene	#N/A	Vacuolar calcium-binding protein-related	51.9103	52.3705	65.4803	50.4451	55.1426	0.0127336	0.33504	-0.0413067	0.0871465	_	_	_	_
AT1G12090	Chr1:4089847-4090725[-]	protein_coding_gene	ELP	extensin-like protein	1065.68	1358.42	2430.96	570.889	455.229	0.350155	1.18975	-0.900492	-1.22711	_	U	_	D
AT1G12100	Chr1:4095246-4095845[+]	protein_coding_gene	#N/A	Bifunctional inhibitor/lipid-transfer protein/seed storage 2S albumin superfamily protein	5.21286	3.1397	3.65813	2.20489	0.950783	-0.731447	-0.510968	-1.24136	-2.45487	_	_	D	D
AT1G12110	Chr1:4105233-4109545[+]	protein_coding_gene	NRT1.1, CHL1-1, NRT1, B-1, ATNRT1, CHL1	nitrate transporter 1.1	77.4737	56.4372	70.042	41.4776	36.146	-0.45706	-0.145486	-0.901374	-1.09987	_	_	_	D
AT1G12120	Chr1:4114771-4117594[-]	protein_coding_gene	#N/A	Plant protein of unknown function (DUF863)	27.0026	30.8247	34.8257	36.3979	38.9842	0.190988	0.367054	0.430757	0.529791	_	_	_	_
AT1G12130	Chr1:4118594-4120871[+]	protein_coding_gene	#N/A	Flavin-binding monooxygenase family protein	0.0872934	0.0679094	0.331926	0.0922567	0.121613	-0.362214	1.9268	0.0797722	0.478306	_	U	_	_
AT1G12140	Chr1:4121369-4124595[+]	protein_coding_gene	FMO GS-OX5	flavin-monooxygenase glucosinolate S-oxygenase 5	23.9744	25.5336	24.9751	25.6198	29.0536	0.0909022	0.0589957	0.0957645	0.277222	_	_	_	_
AT1G12150	Chr1:4123530-4125648[-]	protein_coding_gene	#N/A	Plant protein of unknown function (DUF827)	0.404556	0.32585	0.333927	0.290552	0.268661	-0.312123	-0.276799	-0.477529	-0.590534	_	_	_	_
AT1G12160	Chr1:4126066-4128310[+]	protein_coding_gene	#N/A	Flavin-binding monooxygenase family protein	3.27631	2.4673	0.659636	2.19433	2.38217	-0.409137	-2.31231	-0.578289	-0.459794	_	D	_	_
AT1G12200	Chr1:4137533-4140028[+]	protein_coding_gene	#N/A	Flavin-binding monooxygenase family protein	13.5795	9.22926	16.089	12.758	11.4887	-0.557143	0.244644	-0.0900281	-0.241215	_	_	_	_
AT1G12210	Chr1:4140948-4143605[+]	protein_coding_gene	RFL1	RPS5-like 1	1.49649	2.15537	2.54715	2.9139	1.94659	0.52635	0.767297	0.961364	0.379364	_	_	_	_
AT1G12220	Chr1:4144572-4147911[+]	protein_coding_gene	RPS5	Disease resistance protein (CC-NBS-LRR class) family	4.59409	3.32617	3.26294	3.26311	2.97628	-0.465916	-0.493605	-0.49353	-0.626267	_	_	_	_
AT1G12230	Chr1:4147962-4151056[+]	protein_coding_gene	#N/A	Aldolase superfamily protein	63.6256	61.6117	66.1442	61.4577	57.2058	-0.046403	0.0560073	-0.0500136	-0.153446	_	_	_	_
AT1G12240	Chr1:4153652-4157644[+]	protein_coding_gene	ATBETAFRUCT4, VAC-INV	Glycosyl hydrolases family 32 protein	65.5074	38.3973	35.9922	42.6429	25.8957	-0.770653	-0.863973	-0.619352	-1.33894	_	_	_	D
AT1G12244	Chr1:4157654-4159046[+]	protein_coding_gene	#N/A	Polynucleotidyl transferase, ribonuclease H-like superfamily protein	17.7362	9.26452	8.26172	8.1448	7.99142	-0.936908	-1.10218	-1.12274	-1.15017	_	D	D	D
AT1G12250	Chr1:4159265-4161455[+]	protein_coding_gene	#N/A	Pentapeptide repeat-containing protein	45.3133	25.2008	20.5996	24.0151	27.6572	-0.846465	-1.13732	-0.915992	-0.712279	_	D	_	_
AT1G12260	Chr1:4162832-4165852[-]	protein_coding_gene	VND4, EMB2749, ANAC007, NAC007	NAC 007	1.72183	2.00439	2.17151	2.85434	2.70101	0.219219	0.334754	0.729211	0.649553	_	_	_	_
AT1G12270	Chr1:4172075-4174775[+]	protein_coding_gene	Hop1	stress-inducible protein, putative	33.89	35.1599	32.8048	35.7543	28.415	0.0530713	-0.0469527	0.0772571	-0.254207	_	_	_	_
AT1G12280	Chr1:4174875-4177559[-]	protein_coding_gene	#N/A	LRR and NB-ARC domains-containing disease resistance protein	1.95073	2.22049	1.84689	2.2602	1.75522	0.186863	-0.0789158	0.212435	-0.152361	_	_	_	_
AT1G12290	Chr1:4178359-4182593[-]	protein_coding_gene	#N/A	Disease resistance protein (CC-NBS-LRR class) family	1.06374	1.08083	0.963501	1.43615	0.923946	0.0229938	-0.142786	0.433057	-0.203263	_	_	_	_
AT1G12300	Chr1:4183066-4186124[-]	protein_coding_gene	#N/A	Tetratricopeptide repeat (TPR)-like superfamily protein	1.52963	2.1771	1.94047	1.70075	1.43282	0.509222	0.343221	0.152987	-0.0943247	_	_	_	_
AT1G12310	Chr1:4187165-4188056[-]	protein_coding_gene	#N/A	Calcium-binding EF-hand family protein	93.9538	89.6933	89.9328	72.4254	86.129	-0.0669513	-0.0631041	-0.375456	-0.125452	_	_	_	_
AT1G12320	Chr1:4189355-4190342[+]	protein_coding_gene	#N/A	Protein of unknown function (DUF1442)	5.77722	3.66087	1.94853	5.63679	6.65294	-0.658187	-1.56798	-0.0355016	0.203616	_	D	_	_
AT1G12330	Chr1:4194658-4196749[+]	protein_coding_gene	#N/A	unknown protein; INVOLVED IN: biological_process unknown; LOCATED IN: chloroplast; EXPRESSED IN: 21 plant structures; EXPRESSED DURING: 12 growth stages; BEST Arabidopsis thaliana protein match is: unknown protein (TAIR:AT5G12900.1); Has 249 Blast hits to 249 proteins in 27 species: Archae - 0; Bacteria - 0; Metazoa - 7; Fungi - 14; Plants - 217; Viruses - 0; Other Eukaryotes - 11 (source: NCBI B…	11.5651	11.7627	8.51491	8.02709	9.9229	0.0244415	-0.441714	-0.526828	-0.220944	_	_	_	_
AT1G12340	Chr1:4197396-4198310[+]	protein_coding_gene	#N/A	Cornichon family protein	4.29981	3.42097	3.3546	3.65126	3.57566	-0.329867	-0.358131	-0.235878	-0.266063	_	_	_	_
AT1G12350	Chr1:4198413-4200802[+]	protein_coding_gene	ATCOAB, COAB	4-phospho-panto-thenoylcysteine synthetase	15.7235	14.0252	15.5168	15.6215	16.0755	-0.164901	-0.0190913	-0.0093894	0.0319412	_	_	_	_
AT1G12360	Chr1:4200876-4206404[+]	protein_coding_gene	KEU	Sec1/munc18-like (SM) proteins superfamily	22.3639	24.6475	29.4414	35.6177	30.3233	0.140269	0.396674	0.671422	0.439255	_	_	_	_
AT1G12370	Chr1:4206374-4208951[-]	protein_coding_gene	PHR1, UVR2	photolyase 1	2.75361	3.962	4.64877	3.83148	6.98232	0.524903	0.755523	0.476576	1.34238	_	_	_	U
AT1G12380	Chr1:4214262-4217132[-]	protein_coding_gene	#N/A	unknown protein; BEST Arabidopsis thaliana protein match is: unknown protein (TAIR:AT1G62870.1); Has 173 Blast hits to 170 proteins in 34 species: Archae - 0; Bacteria - 4; Metazoa - 25; Fungi - 8; Plants - 123; Viruses - 7; Other Eukaryotes - 6 (source: NCBI BLink).	2.77981	4.31638	3.26965	3.29192	3.6599	0.634834	0.234149	0.243942	0.396817	_	_	_	_
AT1G12390	Chr1:4220100-4221774[+]	protein_coding_gene	#N/A	Cornichon family protein	25.3699	21.0057	21.3997	20.1566	21.7672	-0.272337	-0.245527	-0.331865	-0.220962	_	_	_	_
AT1G12400	Chr1:4221863-4222837[+]	protein_coding_gene	#N/A	Nucleotide excision repair, TFIIH, subunit TTDA	31.2782	27.1825	32.153	22.6056	24.313	-0.202479	0.0397958	-0.468477	-0.363429	_	_	_	_
AT1G12410	Chr1:4223030-4225124[+]	protein_coding_gene	CLPR2, NCLPP2, CLP2	CLP protease proteolytic subunit 2	139.026	125.966	126.5	113.705	139.693	-0.14232	-0.136217	-0.290059	0.00690501	_	_	_	_
AT1G12420	Chr1:4226362-4229138[-]	protein_coding_gene	ACR8	ACT domain repeat 8	2.29461	10.3978	19.705	5.61848	7.76286	2.17995	3.10224	1.29193	1.75833	U	U	U	U
AT1G12430	Chr1:4233873-4238764[-]	protein_coding_gene	ARK3	armadillo repeat kinesin 3	10.7648	7.93333	6.44216	10.1614	8.86003	-0.440323	-0.740704	-0.0832223	-0.280938	_	_	_	_
AT1G12440	Chr1:4241592-4243008[-]	protein_coding_gene	#N/A	A20/AN1-like zinc finger family protein	134.162	82.0769	84.7048	75.2993	70.2725	-0.708928	-0.66346	-0.833268	-0.932944	_	_	_	_
AT1G12450	Chr1:4244308-4245993[+]	protein_coding_gene	#N/A	SNARE associated Golgi protein family	9.79441	6.18584	9.48551	5.25042	9.89175	-0.662988	-0.0462332	-0.899524	0.0142672	_	_	_	_
AT1G12460	Chr1:4247249-4250630[+]	protein_coding_gene	#N/A	Leucine-rich repeat protein kinase family protein	5.2958	8.5668	7.6803	4.59391	4.4732	0.693907	0.536313	-0.205126	-0.243541	_	_	_	_
AT1G12470	Chr1:4251032-4257392[+]	protein_coding_gene	#N/A	zinc ion binding	17.1748	18.5627	18.3409	18.2097	12.9669	0.112113	0.0947711	0.0844138	-0.405459	_	_	_	_
AT1G12480	Chr1:4257268-4259300[-]	protein_coding_gene	OZS1, SLAC1, RCD3, CDI3	C4-dicarboxylate transporter/malic acid transport protein	1.59666	1.32057	2.19198	1.88897	1.44096	-0.273894	0.457175	0.242541	-0.148026	_	_	_	_
AT1G12500	Chr1:4263150-4265044[-]	protein_coding_gene	#N/A	Nucleotide-sugar transporter family protein	51.4392	27.4923	23.335	27.1642	26.5984	-0.90384	-1.14037	-0.921161	-0.951528	_	D	_	_
AT1G12520	Chr1:4267106-4268926[-]	protein_coding_gene	ATCCS, CCS	copper chaperone for SOD1	54.4122	30.753	23.5073	44.6317	36.1008	-0.823203	-1.21082	-0.285861	-0.591899	_	D	_	_
AT1G12530	Chr1:4268986-4270787[-]	protein_coding_gene	#N/A	unknown protein; BEST Arabidopsis thaliana protein match is: unknown protein (TAIR:AT1G56420.1); Has 54 Blast hits to 53 proteins in 13 species: Archae - 0; Bacteria - 0; Metazoa - 0; Fungi - 0; Plants - 54; Viruses - 0; Other Eukaryotes - 0 (source: NCBI BLink).	21.8869	14.3485	16.5856	14.2425	13.1467	-0.609167	-0.400136	-0.619865	-0.735366	_	_	_	_
AT1G12540	Chr1:4272960-4274206[+]	protein_coding_gene	#N/A	basic helix-loop-helix (bHLH) DNA-binding superfamily protein	0.00793072	0.00812732	0.0069288	0.269441	0.422601	0.0352839	-0.194584	5.08461	5.73392	_	_	U	U
AT1G12550	Chr1:4274594-4275981[+]	protein_coding_gene	#N/A	D-isomer specific 2-hydroxyacid dehydrogenase family protein	3.81834	2.90763	2.99331	3.52723	3.06048	-0.393101	-0.351203	-0.11441	-0.319187	_	_	_	_
AT1G12560	Chr1:4276519-4277899[+]	protein_coding_gene	ATEXPA7, EXP7, ATEXP7, ATHEXP ALPHA 1.26, EXPA7	expansin A7	10.561	8.48712	8.49177	3.88362	5.80425	-0.315399	-0.314609	-1.44327	-0.863564	_	_	D	_
AT1G12570	Chr1:4277993-4280862[-]	protein_coding_gene	#N/A	Glucose-methanol-choline (GMC) oxidoreductase family protein	1.44761	1.51013	2.47042	0.991938	1.45868	0.0609994	0.771079	-0.545347	0.0109904	_	_	_	_
AT1G12580	Chr1:4282899-4285829[+]	protein_coding_gene	PEPKR1	phosphoenolpyruvate carboxylase-related kinase 1	26.7242	27.8109	34.1627	39.2204	31.0867	0.0575037	0.354275	0.553457	0.218151	_	_	_	_
AT1G12600	Chr1:4286204-4288878[-]	protein_coding_gene	#N/A	UDP-N-acetylglucosamine (UAA) transporter family	0.291875	0.418595	0.282148	0.400292	0.265263	0.520189	-0.0488968	0.455689	-0.137922	_	_	_	_
AT1G12610	Chr1:4289944-4291017[-]	protein_coding_gene	DDF1	Integrase-type DNA-binding superfamily protein	0.0639921	0.0735159	0.00532244	6.33542	3.64796	0.200133	-3.58525	6.62918	5.83283	_	D	U	U
AT1G12620	Chr1:4294594-4297084[-]	protein_coding_gene	#N/A	Pentatricopeptide repeat (PPR) superfamily protein	2.76	4.05096	4.01988	3.67606	1.74625	0.553594	0.542483	0.413491	-0.660405	_	_	_	_
AT1G12630	Chr1:4298889-4299475[+]	protein_coding_gene	#N/A	Integrase-type DNA-binding superfamily protein	0.351517	0.428904	0.377656	0.249388	0.13594	0.287053	0.103475	-0.495186	-1.37056	_	_	_	D
AT1G12640	Chr1:4303312-4305798[-]	protein_coding_gene	#N/A	MBOAT (membrane bound O-acyl transferase) family protein	28.2145	29.3133	51.7006	24.1514	25.2924	0.0551186	0.873744	-0.22433	-0.157733	_	_	_	_
AT1G12650	Chr1:4305933-4308005[+]	protein_coding_gene	#N/A	unknown protein; FUNCTIONS IN: molecular_function unknown; INVOLVED IN: biological_process unknown; LOCATED IN: cellular_component unknown; EXPRESSED IN: 23 plant structures; EXPRESSED DURING: 13 growth stages; CONTAINS InterPro DOMAIN/s: Protein of unknown function DUF947 (InterPro:IPR009292); Has 700 Blast hits to 631 proteins in 192 species: Archae - 0; Bacteria - 32; Metazoa - 138; Fungi - 16…	25.9408	23.1511	22.379	26.4936	28.7852	-0.164142	-0.213077	0.0304209	0.150104	_	_	_	_
AT1G12669	Chr1:4315466-4315987[+]	pseudogene	#N/A	Encodes a Plant thionin family protein [pseudogene]	0.192418	0.336649	0.616413	0.0881941	0.0314832	0.806969	1.6796	-1.1254	-2.61121	_	U	_	_
AT1G12670	Chr1:4316701-4317005[+]	pseudogene	#N/A	Encodes a Plant thionin family protein [pseudogene]	4.03411	4.17262	12.3579	1.95861	1.57492	0.048703	1.61511	-1.04242	-1.35697	_	U	D	D
AT1G12672	Chr1:4318309-4319090[+]	protein_coding_gene	#N/A	unknown protein; LOCATED IN: endomembrane system; BEST Arabidopsis thaliana protein match is: unknown protein (TAIR:AT1G12663.1).	0.595617	0.535318	1.92925	0.224893	0.10581	-0.153986	1.69557	-1.40511	-2.4928	_	U	D	D
AT1G12680	Chr1:4319886-4322945[-]	protein_coding_gene	PEPKR2	phosphoenolpyruvate carboxylase-related kinase 2	11.6187	9.04257	10.9582	11.1496	11.1638	-0.361644	-0.0844377	-0.0594567	-0.0576204	_	_	_	_
AT1G12700	Chr1:4323556-4326333[-]	protein_coding_gene	#N/A	ATP binding;nucleic acid binding;helicases	1.57237	1.81772	2.06803	2.01609	1.19528	0.209188	0.395314	0.358617	-0.395589	_	_	_	_
AT1G12710	Chr1:4326739-4328481[-]	protein_coding_gene	AtPP2-A12, PP2-A12	phloem protein 2-A12	5.75483	5.75247	7.67834	8.64518	18.9064	-0.000591756	0.416021	0.587122	1.71603	_	_	_	U
AT1G12730	Chr1:4334615-4337844[+]	protein_coding_gene	#N/A	GPI transamidase subunit PIG-U	3.5603	3.31726	3.63285	3.6119	3.0013	-0.102006	0.0291029	0.0207591	-0.246411	_	_	_	_
AT1G12740	Chr1:4342282-4344857[+]	protein_coding_gene	CYP87A2	cytochrome P450, family 87, subfamily A, polypeptide 2	3.95688	2.18951	1.32979	7.67885	9.45984	-0.853752	-1.57316	0.956525	1.25745	_	D	_	U
AT1G12750	Chr1:4344985-4348328[-]	protein_coding_gene	RBL6	RHOMBOID-like protein 6	10.042	12.5709	12.281	24.6779	24.409	0.324041	0.290381	1.29717	1.28137	_	_	U	U
AT1G12760	Chr1:4348498-4350867[+]	protein_coding_gene	#N/A	Zinc finger, C3HC4 type (RING finger) family protein	35.5671	31.3039	32.8519	39.6182	39.5857	-0.184201	-0.114567	0.15562	0.154436	_	_	_	_
AT1G12770	Chr1:4351064-4353685[+]	protein_coding_gene	ISE1, EMB1586	P-loop containing nucleoside triphosphate hydrolases superfamily protein	41.042	41.3739	45.0959	41.4696	38.6187	0.0116199	0.135895	0.0149531	-0.0878014	_	_	_	_
AT1G12775	Chr1:4353906-4355929[+]	protein_coding_gene	#N/A	Pentatricopeptide repeat (PPR) superfamily protein	2.01075	2.48618	2.52977	2.47284	3.06447	0.306196	0.331271	0.298434	0.607901	_	_	_	_
AT1G12780	Chr1:4355926-4358328[-]	protein_coding_gene	UGE1, ATUGE1	UDP-D-glucose/UDP-D-galactose 4-epimerase 1	118.237	56.8239	42.3764	101.117	69.0179	-1.05711	-1.48035	-0.225656	-0.776639	D	D	_	_
AT1G12790	Chr1:4359151-4361272[-]	protein_coding_gene	#N/A	CONTAINS InterPro DOMAIN/s: RuvA domain 2-like (InterPro:IPR010994); Has 29 Blast hits to 29 proteins in 9 species: Archae - 0; Bacteria - 2; Metazoa - 0; Fungi - 0; Plants - 27; Viruses - 0; Other Eukaryotes - 0 (source: NCBI BLink).	6.88354	4.61134	4.18642	8.08598	7.61341	-0.577964	-0.717432	0.232272	0.145392	_	_	_	_
AT1G12800	Chr1:4361551-4365331[-]	protein_coding_gene	#N/A	Nucleic acid-binding, OB-fold-like protein	80.3767	76.2757	72.9032	80.9463	62.8154	-0.0755538	-0.140795	0.0101878	-0.355659	_	_	_	_
AT1G12805	Chr1:4366597-4367119[+]	protein_coding_gene	#N/A	nucleotide binding	0.83033	1.0241	0.292416	0.447639	0.101	0.302597	-1.50563	-0.891334	-3.0392	_	D	_	D
AT1G12810	Chr1:4367256-4368822[+]	protein_coding_gene	#N/A	proline-rich family protein	45.3792	46.5283	50.883	41.0271	41.2196	0.0360773	0.165153	-0.145454	-0.138701	_	_	_	_
AT1G12820	Chr1:4368760-4371293[-]	protein_coding_gene	AFB3	auxin signaling F-box 3	29.9905	20.4159	21.1358	19.6704	17.2251	-0.554812	-0.504817	-0.608479	-0.799993	_	_	_	_
AT1G12830	Chr1:4374250-4375170[-]	protein_coding_gene	#N/A	unknown protein; FUNCTIONS IN: molecular_function unknown; INVOLVED IN: biological_process unknown; LOCATED IN: cellular_component unknown; EXPRESSED IN: 23 plant structures; EXPRESSED DURING: 13 growth stages; Has 39778 Blast hits to 22088 proteins in 1060 species: Archae - 152; Bacteria - 6161; Metazoa - 14109; Fungi - 6144; Plants - 2156; Viruses - 601; Other Eukaryotes - 10455 (source: NCBI B…	30.6005	24.3503	17.823	20.9125	22.6205	-0.329616	-0.779815	-0.549189	-0.435924	_	_	_	_
AT1G12840	Chr1:4375515-4378514[+]	protein_coding_gene	DET3, ATVHA-C	vacuolar ATP synthase subunit C (VATC) / V-ATPase C subunit / vacuolar proton pump C subunit (DET3)	154.066	149.808	181.704	119.473	147.41	-0.0404338	0.238042	-0.366864	-0.0637141	_	_	_	_
AT1G12845	Chr1:4378939-4379516[-]	protein_coding_gene	#N/A	unknown protein; FUNCTIONS IN: molecular_function unknown; INVOLVED IN: biological_process unknown; LOCATED IN: endomembrane system; EXPRESSED IN: 22 plant structures; EXPRESSED DURING: 13 growth stages; Has 8 Blast hits to 8 proteins in 4 species: Archae - 0; Bacteria - 0; Metazoa - 0; Fungi - 0; Plants - 8; Viruses - 0; Other Eukaryotes - 0 (source: NCBI BLink).	13.6249	40.3389	121.1	22.0702	55.8444	1.56593	3.15188	0.695854	2.03517	U	U	_	U
AT1G12850	Chr1:4379707-4381612[-]	protein_coding_gene	#N/A	Phosphoglycerate mutase family protein	25.3413	32.6527	35.8047	25.2478	23.166	0.365712	0.498658	-0.00533285	-0.129482	_	_	_	_
AT1G12855	Chr1:4382160-4383611[+]	protein_coding_gene	#N/A	F-box family protein	0.153008	0.0569381	0.0659221	0.0410916	0.0440919	-1.42598	-1.21465	-1.89643	-1.79479	D	D	D	D
AT1G12860	Chr1:4384353-4386610[+]	protein_coding_gene	SCRM2, ICE2	basic helix-loop-helix (bHLH) DNA-binding superfamily protein	29.3983	21.7186	23.1647	18.5607	17.0044	-0.436801	-0.343805	-0.663481	-0.789824	_	_	_	_
AT1G12870	Chr1:4387129-4389110[-]	protein_coding_gene	#N/A	F-box and associated interaction domains-containing protein	0.0109568	0.04043	0.0553417	0.145138	0.17678	1.88264	2.33549	3.72631	4.01082	_	U	U	U
AT1G12880	Chr1:4389751-4391151[+]	protein_coding_gene	atnudt12, NUDT12	nudix hydrolase homolog 12	4.47484	5.54909	6.48374	9.26319	8.62589	0.310414	0.534989	1.04967	0.946836	_	_	U	_
AT1G12890	Chr1:4391734-4392393[+]	protein_coding_gene	#N/A	Integrase-type DNA-binding superfamily protein	0.102213	0.242704	0.372697	0.935595	1.56492	1.24754	1.86632	3.19418	3.93631	U	U	U	U
AT1G12900	Chr1:4392450-4394400[-]	protein_coding_gene	GAPA-2	glyceraldehyde 3-phosphate dehydrogenase A subunit 2	673.204	493.486	384.808	390.614	384.101	-0.448035	-0.806905	-0.7853	-0.809558	_	_	_	_
AT1G12910	Chr1:4394897-4396291[-]	protein_coding_gene	ATAN11, LWD1	Transducin/WD40 repeat-like superfamily protein	32.5788	24.6604	27.9701	22.9966	24.5006	-0.401737	-0.220048	-0.502513	-0.411116	_	_	_	_
AT1G12920	Chr1:4396348-4398193[-]	protein_coding_gene	ERF1-2	eukaryotic release factor 1-2	89.4083	93.926	87.2781	86.3114	82.4805	0.0711158	-0.0347891	-0.0508576	-0.116356	_	_	_	_
AT1G12930	Chr1:4398375-4405605[-]	protein_coding_gene	#N/A	ARM repeat superfamily protein	8.63946	8.62747	9.49316	10.4458	8.24272	-0.00200359	0.135947	0.27391	-0.0678206	_	_	_	_
AT1G12940	Chr1:4416405-4418590[+]	protein_coding_gene	ATNRT2.5, NRT2.5	nitrate transporter2.5	0.0599551	0.0642563	0.0132849	0.0963451	0.0945513	0.0999393	-2.17325	0.684238	0.657127	_	D	_	_
AT1G12950	Chr1:4419770-4422638[+]	protein_coding_gene	RSH2	root hair specific 2	2.75088	2.09038	1.99271	10.2599	10.3777	-0.396126	-0.465159	1.89905	1.91552	_	_	U	U
AT1G12970	Chr1:4423640-4425789[+]	protein_coding_gene	PIRL3	plant intracellular ras group-related LRR 3	12.7742	7.10855	8.3411	8.59193	9.10731	-0.845605	-0.614923	-0.572178	-0.488136	_	_	_	_
AT1G12980	Chr1:4429718-4430965[+]	protein_coding_gene	ESR1, DRN	Integrase-type DNA-binding superfamily protein	0.0489114	0.0927316	0.0550623	0.113186	0.0868351	0.922751	0.170861	1.21029	0.827979	_	_	U	_
AT1G12990	Chr1:4433640-4436075[+]	protein_coding_gene	#N/A	beta-1,4-N-acetylglucosaminyltransferase family protein	13.1665	23.0247	26.5034	23.8141	32.0406	0.80631	1.00931	0.854944	1.28303	_	U	_	U
AT1G13000	Chr1:4436105-4439476[-]	protein_coding_gene	#N/A	Protein of unknown function (DUF707)	14.6511	15.798	13.5561	27.5261	18.5872	0.108733	-0.112067	0.909791	0.3433	_	_	_	_
AT1G13020	Chr1:4440544-4443684[-]	protein_coding_gene	EIF4B2	eukaryotic initiation factor 4B2	16.4511	21.0748	18.8082	21.2613	17.7263	0.357335	0.193178	0.370046	0.107707	_	_	_	_
AT1G13030	Chr1:4444043-4447406[-]	protein_coding_gene	#N/A	sphere organelles protein-related	6.67561	5.73228	5.03855	7.07121	5.84741	-0.21979	-0.40589	0.0830573	-0.191102	_	_	_	_
AT1G13040	Chr1:4447647-4449200[+]	protein_coding_gene	#N/A	Pentatricopeptide repeat (PPR-like) superfamily protein	3.25857	4.13203	3.40441	4.63144	2.9498	0.342611	0.0631656	0.507221	-0.143621	_	_	_	_
AT1G13050	Chr1:4450238-4451742[+]	protein_coding_gene	#N/A	unknown protein; FUNCTIONS IN: molecular_function unknown; INVOLVED IN: biological_process unknown; LOCATED IN: endomembrane system; EXPRESSED IN: 14 plant structures; EXPRESSED DURING: 9 growth stages; BEST Arabidopsis thaliana protein match is: unknown protein (TAIR:AT3G26350.1); Has 260 Blast hits to 259 proteins in 20 species: Archae - 0; Bacteria - 0; Metazoa - 0; Fungi - 0; Plants - 260; Vi…	3.58404	5.14851	4.15126	5.65133	4.16982	0.522567	0.211962	0.657002	0.218398	_	_	_	_
AT1G13060	Chr1:4452212-4454876[+]	protein_coding_gene	PBE1	20S proteasome beta subunit E1	128.605	121.474	134.701	114.279	126.16	-0.0822992	0.0668138	-0.170386	-0.0276922	_	_	_	_
AT1G13070	Chr1:4455477-4457099[+]	pseudogene	CYP71B27	putative cytochrome P450	0.00389529	0.0041627	0.0106928	0.0812108	0.162607	0.0955515	1.45449	4.37835	5.3799	_	_	U	U
AT1G13080	Chr1:4459166-4460940[+]	protein_coding_gene	CYP71B2	cytochrome P450, family 71, subfamily B, polypeptide 2	27.4033	22.7108	24.7798	6.32799	8.25266	-0.270971	-0.145185	-2.11453	-1.73142	_	_	D	D
AT1G13090	Chr1:4461806-4463543[+]	protein_coding_gene	CYP71B28	cytochrome P450, family 71, subfamily B, polypeptide 28	20.8234	19.1657	36.867	10.3621	18.0443	-0.119679	0.824124	-1.00689	-0.206662	_	_	D	_
AT1G13100	Chr1:4463924-4465538[+]	protein_coding_gene	CYP71B29	cytochrome P450, family 71, subfamily B, polypeptide 29	10.5027	6.67162	9.70729	6.00851	4.29912	-0.65465	-0.11362	-0.80568	-1.28864	_	_	_	D
AT1G13110	Chr1:4467220-4469033[+]	protein_coding_gene	CYP71B7	cytochrome P450, family 71 subfamily B, polypeptide 7	76.2372	33.0787	29.4274	58.4494	38.3521	-1.20459	-1.37333	-0.383307	-0.991189	D	D	_	_
AT1G13120	Chr1:4469181-4473213[-]	protein_coding_gene	#N/A	#N/A	8.63582	11.2464	10.4637	12.567	9.18386	0.381058	0.276988	0.541235	0.0887674	_	_	_	_
AT1G13130	Chr1:4474720-4477941[+]	protein_coding_gene	#N/A	Cellulase (glycosyl hydrolase family 5) protein	1.03981	1.0908	1.36271	0.573364	0.438816	0.069066	0.390155	-0.858785	-1.24461	_	_	_	D
AT1G13145	Chr1:4480860-4481334[+]	pseudogene	#N/A	pseudogene of unknown protein	11.9986	11.3258	8.85423	7.11352	8.63118	-0.0832531	-0.438427	-0.75423	-0.475236	_	_	_	_
AT1G13160	Chr1:4484584-4488577[+]	protein_coding_gene	#N/A	ARM repeat superfamily protein	21.9586	24.4461	18.9827	25.5602	23.6968	0.154818	-0.210101	0.219113	0.109906	_	_	_	_
AT1G13170	Chr1:4488533-4492587[-]	protein_coding_gene	ORP1D	OSBP(oxysterol binding protein)-related protein 1D	8.86786	11.7471	11.768	11.3646	9.82196	0.405646	0.408211	0.357889	0.147425	_	_	_	_
AT1G13180	Chr1:4495028-4498469[+]	protein_coding_gene	DIS1, ARP3, ATARP3	Actin-like ATPase superfamily protein	7.0802	6.74869	7.09439	8.76845	7.79743	-0.0691825	0.00288852	0.308531	0.139208	_	_	_	_
AT1G13190	Chr1:4498881-4501613[+]	protein_coding_gene	#N/A	RNA-binding (RRM/RBD/RNP motifs) family protein	21.3702	18.3842	21.8088	22.196	21.2268	-0.217134	0.02931	0.0546993	-0.00971351	_	_	_	_
AT1G13195	Chr1:4501581-4503591[-]	protein_coding_gene	#N/A	RING/U-box superfamily protein	8.25091	7.29761	9.02217	11.0558	15.4157	-0.177129	0.128921	0.422178	0.901774	_	_	_	_
AT1G13200	Chr1:4507221-4508528[-]	protein_coding_gene	#N/A	F-box and associated interaction domains-containing protein	0.0261022	0.0218136	0.0142947	0.104874	0.121502	-0.258835	-0.868235	2.006	2.2183	_	_	U	U
AT1G13210	Chr1:4508963-4513938[-]	protein_coding_gene	ACA.l	autoinhibited Ca2+/ATPase II	15.3292	10.1842	12.6397	49.627	26.2893	-0.589949	-0.27832	1.69484	0.778193	_	_	U	_
AT1G13220	Chr1:4515606-4520284[+]	protein_coding_gene	LINC2	nuclear matrix constituent protein-related	6.91283	7.57695	7.54254	10.3954	7.15381	0.132341	0.125774	0.588596	0.0494353	_	_	_	_
AT1G13230	Chr1:4520631-4522544[+]	protein_coding_gene	#N/A	Leucine-rich repeat (LRR) family protein	0.291279	0.150688	0.124284	0.210998	0.16839	-0.950791	-1.22869	-0.465154	-0.790559	_	D	_	_
AT1G13245	Chr1:4525486-4526064[-]	protein_coding_gene	RTFL17, DVL4	ROTUNDIFOLIA like 17	313.478	47.7987	49.5329	50.7176	63.4328	-2.71332	-2.6619	-2.62781	-2.30506	D	D	D	D
AT1G13250	Chr1:4528623-4530063[-]	protein_coding_gene	GATL3	galacturonosyltransferase-like 3	25.8168	21.1658	21.1486	11.5558	15.2847	-0.286575	-0.287748	-1.15969	-0.756222	_	_	D	_
AT1G13260	Chr1:4542168-4543742[+]	protein_coding_gene	RAV1, EDF4	related to ABI3/VP1 1	100.478	22.7237	26.3629	20.6626	25.4345	-2.14461	-1.9303	-2.28179	-1.98202	D	D	D	D
AT1G13270	Chr1:4544953-4547312[+]	protein_coding_gene	MAP1C, MAP1B	methionine aminopeptidase 1B	41.7588	50.6584	68.159	47.7217	54.1651	0.278721	0.706824	0.192565	0.375283	_	_	_	_
AT1G13280	Chr1:4547454-4548875[+]	protein_coding_gene	AOC4	allene oxide cyclase 4	38.6208	38.3614	50.5077	33.2524	45.4288	-0.00972267	0.387125	-0.21592	0.234229	_	_	_	_
AT1G13300	Chr1:4556892-4558708[+]	protein_coding_gene	HRS1	myb-like transcription factor family protein	24.2106	8.7915	5.73006	11.7655	10.7993	-1.46146	-2.07901	-1.04108	-1.1647	D	D	D	D
AT1G13310	Chr1:4561068-4563061[-]	protein_coding_gene	#N/A	Endosomal targeting BRO1-like domain-containing protein	0.0892869	0.0921554	0.256674	0.256798	0.708022	0.0456152	1.52331	1.52401	2.98713	_	U	U	U
AT1G13320	Chr1:4563471-4567807[-]	protein_coding_gene	PP2AA3	protein phosphatase 2A subunit A3	42.7188	44.8289	47.4832	42.7693	39.1623	0.069558	0.152546	0.00170447	-0.125406	_	_	_	_
AT1G13330	Chr1:4567935-4570598[+]	protein_coding_gene	AHP2	Arabidopsis Hop2 homolog	2.74701	3.4567	4.43856	3.26396	3.94375	0.331532	0.692228	0.24876	0.521704	_	_	_	_
AT1G13340	Chr1:4569448-4571118[-]	protein_coding_gene	#N/A	Regulator of Vps4 activity in the MVB pathway protein	7.1366	5.98936	5.78636	10.5208	10.5808	-0.252835	-0.30258	0.559935	0.568139	_	_	_	_
AT1G13350	Chr1:4572419-4576632[-]	protein_coding_gene	#N/A	Protein kinase superfamily protein	9.54684	9.7368	9.02698	14.3758	11.6322	0.0284244	-0.0807798	0.590547	0.285029	_	_	_	_
AT1G13360	Chr1:4576873-4577967[-]	protein_coding_gene	#N/A	unknown protein; FUNCTIONS IN: molecular_function unknown; INVOLVED IN: biological_process unknown; LOCATED IN: cellular_component unknown; BEST Arabidopsis thaliana protein match is: unknown protein (TAIR:AT3G25870.1).	63.8589	83.6867	101.256	41.3712	34.1887	0.390111	0.665048	-0.626261	-0.901368	_	_	_	_
AT1G13370	Chr1:4587780-4588613[-]	protein_coding_gene	#N/A	Histone superfamily protein	0.318982	0.431577	0.669261	0.688154	0.324724	0.436131	1.06907	1.10923	0.0257382	_	U	U	_
AT1G13380	Chr1:4589071-4590423[-]	protein_coding_gene	#N/A	Protein of unknown function (DUF1218)	47.9518	37.6161	26.0631	51.6968	41.7862	-0.350235	-0.879576	0.10849	-0.198558	_	_	_	_
AT1G13390	Chr1:4592481-4594391[-]	protein_coding_gene	#N/A	unknown protein; BEST Arabidopsis thaliana protein match is: unknown protein (TAIR:AT1G68490.1); Has 114 Blast hits to 114 proteins in 18 species: Archae - 0; Bacteria - 0; Metazoa - 0; Fungi - 0; Plants - 114; Viruses - 0; Other Eukaryotes - 0 (source: NCBI BLink).	30.8301	23.3875	22.052	40.341	39.1946	-0.398602	-0.48343	0.387907	0.346315	_	_	_	_
AT1G13400	Chr1:4597627-4598911[+]	protein_coding_gene	NUB, JGL	C2H2 and C2HC zinc fingers superfamily protein	0.4539	0.340349	0.290064	0.392476	0.218046	-0.415349	-0.645985	-0.209765	-1.05771	_	_	_	D
AT1G13410	Chr1:4601261-4603298[+]	protein_coding_gene	#N/A	Tetratricopeptide repeat (TPR)-like superfamily protein	1.30476	2.16805	2.81955	2.37969	2.05172	0.732609	1.11167	0.866984	0.653045	_	U	_	_
AT1G13420	Chr1:4604841-4606053[+]	protein_coding_gene	ATST4B, ST4B	sulfotransferase 4B	1.62246	0.846477	0.484887	5.53672	5.71508	-0.938632	-1.74244	1.77084	1.81658	_	D	U	U
AT1G13430	Chr1:4606500-4607747[+]	protein_coding_gene	ATST4C, ST4C	sulfotransferase 4C	5.66974	2.17406	1.30255	1.76307	0.954347	-1.38289	-2.12194	-1.68519	-2.57068	D	D	D	D
AT1G13440	Chr1:4608196-4610647[-]	protein_coding_gene	GAPC-2, GAPC2	glyceraldehyde-3-phosphate dehydrogenase C2	1482.68	1364.92	1220.34	1220.39	1531.61	-0.119391	-0.280924	-0.280865	0.0468417	_	_	_	_
AT1G13448	Chr1:4612243-4612929[+]	other_RNA	#N/A	other RNA	1.97827	1.29991	2.11178	0.839048	0.865907	-0.605824	0.0942197	-1.2374	-1.19195	_	_	D	D
AT1G13450	Chr1:4612731-4615353[-]	protein_coding_gene	GT-1	Homeodomain-like superfamily protein	25.0533	15.0648	16.289	20.6847	18.1052	-0.733819	-0.621102	-0.276436	-0.468596	_	_	_	_
AT1G13460	Chr1:4615813-4618329[+]	protein_coding_gene	#N/A	Protein phosphatase 2A regulatory B subunit family protein	9.60251	13.1664	13.7387	11.4667	8.51096	0.455377	0.516762	0.255967	-0.174089	_	_	_	_
AT1G13470	Chr1:4620228-4621580[-]	protein_coding_gene	#N/A	Protein of unknown function (DUF1262)	0.97051	2.16535	1.80434	2.45444	1.93942	1.15778	0.894649	1.33857	0.998803	U	_	U	_
AT1G13480	Chr1:4622634-4624070[-]	protein_coding_gene	#N/A	Protein of unknown function (DUF1262)	2.36811	3.96961	2.41253	3.80736	3.11703	0.745259	0.0268107	0.685053	0.396434	_	_	_	_
AT1G13490	Chr1:4624715-4626064[-]	protein_coding_gene	#N/A	Protein of unknown function (DUF1262)	0.0212188	0.0721381	0.0634727	0.0458679	0.0745453	1.76494	1.58034	1.11178	1.81229	U	_	_	_
AT1G13500	Chr1:4627789-4629169[-]	protein_coding_gene	#N/A	Protein of unknown function (DUF1262)	0.31317	0.191001	0.0287819	0.577203	0.606531	-0.713336	-3.44326	0.882112	0.953613	_	D	_	_
AT1G13510	Chr1:4629203-4630821[-]	protein_coding_gene	#N/A	Protein of unknown function (DUF1262)	0.740894	0.323166	0.12185	1.22533	1.15121	-1.19697	-2.60406	0.725824	0.635805	D	D	_	_
AT1G13520	Chr1:4631778-4633248[-]	protein_coding_gene	#N/A	Protein of unknown function (DUF1262)	1.60313	1.53684	3.86399	3.7538	3.14646	-0.0609241	1.26919	1.22746	0.972834	_	U	U	_
AT1G13530	Chr1:4633740-4635129[-]	protein_coding_gene	#N/A	Protein of unknown function (DUF1262)	1.69798	1.97271	2.12352	2.58819	2.25816	0.216358	0.322637	0.608121	0.411326	_	_	_	_
AT1G13540	Chr1:4635463-4636805[-]	protein_coding_gene	#N/A	Protein of unknown function (DUF1262)	0.691072	0.830325	0.450207	1.12057	0.940111	0.264837	-0.618236	0.697317	0.44399	_	_	_	_
AT1G13550	Chr1:4636984-4638330[-]	protein_coding_gene	#N/A	Protein of unknown function (DUF1262)	0.30157	0.336741	0.174147	0.648428	0.545251	0.159141	-0.792152	1.10443	0.854406	_	_	U	_
AT1G13560	Chr1:4638514-4642104[-]	protein_coding_gene	AAPT1, ATAAPT1	aminoalcoholphosphotransferase 1	54.0867	61.9336	64.1183	87.6357	73.9551	0.195448	0.245462	0.696245	0.451376	_	_	_	_
AT1G13570	Chr1:4642346-4644422[-]	protein_coding_gene	#N/A	F-box/RNI-like superfamily protein	13.7397	10.2999	10.2853	11.6304	10.9579	-0.41572	-0.417766	-0.24045	-0.326379	_	_	_	_
AT1G13580	Chr1:4644521-4647007[-]	protein_coding_gene	LAG13	LAG1 longevity assurance homolog 3	7.96303	8.80426	10.8662	6.89234	6.28355	0.144884	0.448458	-0.208323	-0.341737	_	_	_	_
AT1G13590	Chr1:4647949-4648740[+]	protein_coding_gene	ATPSK1, PSK1	phytosulfokine 1 precursor	13.7699	13.053	6.8083	6.98723	10.5655	-0.0771366	-1.01615	-0.978725	-0.382157	_	D	_	_
AT1G13600	Chr1:4650787-4651469[-]	protein_coding_gene	AtbZIP58, bZIP58	basic leucine-zipper 58	4.32533	7.69385	9.81799	3.04696	2.1068	0.830894	1.18262	-0.505438	-1.03775	_	U	_	D
AT1G13609	Chr1:4662721-4663219[+]	protein_coding_gene	#N/A	Defensin-like (DEFL) family protein	0.20316	0.142058	0.154943	0.0931828	0.0996724	-0.516106	-0.390857	-1.1244	-1.02728	_	_	_	_
AT1G13610	Chr1:4663831-4666031[-]	protein_coding_gene	#N/A	alpha/beta-Hydrolases superfamily protein	0.16094	0.077637	0.0630222	0.0834248	0.125108	-1.05161	-1.35245	-0.947891	-0.363323	D	D	_	_
AT1G13620	Chr1:4668443-4669471[+]	protein_coding_gene	RGF2	Encodes a root meristem growth factor (RGF). Belongs to a family of functionally redundant homologous peptides that are secreted, tyrosine-sulfated, and expressed mainly in the stem cell area and the innermost layer of central columella cells. RGFs are required for maintenance of the root stem cell niche and transit amplifying cell proliferation. Members of this family include: At5g60810 (RGF1), …	0.251917	0.316361	0.233884	0.109585	0.144581	0.328612	-0.107151	-1.20082	-0.801028	_	_	_	_
AT1G13630	Chr1:4669784-4672957[-]	protein_coding_gene	#N/A	Tetratricopeptide repeat (TPR)-like superfamily protein	1.71379	1.64119	1.3658	2.17954	1.1504	-0.0624477	-0.327442	0.346832	-0.575051	_	_	_	_
AT1G13635	Chr1:4674152-4676170[+]	protein_coding_gene	#N/A	DNA glycosylase superfamily protein	1.63994	1.694	1.20094	1.65791	1.75183	0.0467906	-0.449476	0.0157226	0.0952192	_	_	_	_
AT1G13640	Chr1:4677027-4679812[-]	protein_coding_gene	#N/A	Phosphatidylinositol 3- and 4-kinase family protein	25.3179	13.164	14.0726	12.8582	10.6142	-0.943559	-0.847268	-0.977468	-1.25416	_	_	_	D
AT1G13650	Chr1:4680432-4682196[-]	protein_coding_gene	#N/A	BEST Arabidopsis thaliana protein match is: 18S pre-ribosomal assembly protein gar2-related (TAIR:AT2G03810.4); Has 3688 Blast hits to 1629 proteins in 255 species: Archae - 22; Bacteria - 222; Metazoa - 684; Fungi - 292; Plants - 62; Viruses - 14; Other Eukaryotes - 2392 (source: NCBI BLink).	9.14457	4.14289	1.90674	2.40763	1.54834	-1.14228	-2.2618	-1.9253	-2.56219	D	D	D	D
AT1G13670	Chr1:4688156-4688966[+]	protein_coding_gene	#N/A	unknown protein; Has 22 Blast hits to 22 proteins in 7 species: Archae - 0; Bacteria - 0; Metazoa - 0; Fungi - 0; Plants - 22; Viruses - 0; Other Eukaryotes - 0 (source: NCBI BLink).	20.443	6.11606	9.70353	6.2767	4.78602	-1.74093	-1.07502	-1.70353	-2.09471	D	D	D	D
AT1G13680	Chr1:4690409-4692841[+]	protein_coding_gene	#N/A	PLC-like phosphodiesterases superfamily protein	0.13244	0.0694222	0.121122	0.125824	0.0485185	-0.931771	-0.128868	-0.0739261	-1.44854	_	_	_	D
AT1G13690	Chr1:4693289-4694410[+]	protein_coding_gene	ATE1	ATPase E1	29.368	26.7079	24.5117	21.3872	23.9335	-0.136978	-0.260774	-0.457497	-0.295214	_	_	_	_
AT1G13700	Chr1:4694372-4696023[-]	protein_coding_gene	PGL1	6-phosphogluconolactonase 1	21.3113	5.54927	13.2543	6.84002	3.91315	-1.94125	-0.685158	-1.63954	-2.44521	D	_	D	D
AT1G13710	Chr1:4702725-4704657[-]	protein_coding_gene	CYP78A5, KLU	cytochrome P450, family 78, subfamily A, polypeptide 5	3.09699	2.82707	2.34787	3.74631	2.55898	-0.131559	-0.399513	0.274603	-0.275297	_	_	_	_
AT1G13730	Chr1:4709824-4712550[+]	protein_coding_gene	#N/A	Nuclear transport factor 2 (NTF2) family protein with RNA binding (RRM-RBD-RNP motifs) domain	22.2237	30.4871	24.446	25.8601	29.7017	0.4561	0.137499	0.218629	0.418446	_	_	_	_
AT1G13740	Chr1:4713674-4715407[+]	protein_coding_gene	AFP2	ABI five binding protein 2	3.68304	19.1598	22.6751	16.1997	22.8298	2.37911	2.62214	2.137	2.63195	U	U	U	U
AT1G13750	Chr1:4715394-4718235[-]	protein_coding_gene	#N/A	Purple acid phosphatases superfamily protein	4.54322	5.89545	8.5418	5.34471	4.97689	0.375886	0.910823	0.234396	0.131529	_	_	_	_
AT1G13770	Chr1:4721695-4724510[+]	protein_coding_gene	RUS3	Protein of unknown function, DUF647	8.96904	8.83533	8.7831	9.8552	8.86123	-0.0216695	-0.0302233	0.135931	-0.0174466	_	_	_	_
AT1G13780	Chr1:4724608-4726499[+]	protein_coding_gene	#N/A	F-box/RNI-like/FBD-like domains-containing protein	5.01147	4.36507	4.39572	5.07033	6.70184	-0.199229	-0.189134	0.0168458	0.419323	_	_	_	_
AT1G13790	Chr1:4727438-4730425[+]	protein_coding_gene	#N/A	XH/XS domain-containing protein	3.11039	2.45373	2.39252	4.29971	1.82704	-0.342118	-0.378563	0.467143	-0.767584	_	_	_	_
AT1G13800	Chr1:4731056-4733707[-]	protein_coding_gene	#N/A	Tetratricopeptide repeat (TPR)-like superfamily protein	0.981515	1.12219	0.862981	1.26105	0.709057	0.193233	-0.18568	0.36154	-0.469103	_	_	_	_
AT1G13810	Chr1:4734036-4735389[+]	protein_coding_gene	#N/A	Restriction endonuclease, type II-like superfamily protein	11.3527	9.08809	7.94948	9.30093	8.94865	-0.320986	-0.514103	-0.287588	-0.343293	_	_	_	_
AT1G13820	Chr1:4735547-4737808[+]	protein_coding_gene	#N/A	alpha/beta-Hydrolases superfamily protein	44.7269	34.4141	32.6952	34.7228	32.1926	-0.378143	-0.452064	-0.365259	-0.474414	_	_	_	_
AT1G13830	Chr1:4739873-4741038[-]	protein_coding_gene	#N/A	Carbohydrate-binding X8 domain superfamily protein	6.09621	6.65219	12.1296	3.98458	5.4437	0.125917	0.992546	-0.613484	-0.163325	_	_	_	_
AT1G13860	Chr1:4743205-4746956[-]	protein_coding_gene	QUL1	QUASIMODO2 LIKE 1	6.86171	10.5963	12.0645	8.68825	11.6708	0.62692	0.814127	0.340497	0.766263	_	_	_	_
AT1G13870	Chr1:4747265-4748642[-]	protein_coding_gene	DRL1, AtKTI12	calmodulin binding;purine nucleotide binding	18.5042	19.243	20.2265	16.8339	18.0649	0.0564809	0.128394	-0.136483	-0.0346635	_	_	_	_
AT1G13880	Chr1:4748873-4751212[+]	protein_coding_gene	#N/A	ELM2 domain-containing protein	19.5335	16.0855	17.3237	19.0002	19.7286	-0.28019	-0.173203	-0.0399358	0.0143381	_	_	_	_
AT1G13890	Chr1:4751581-4752844[+]	protein_coding_gene	SNAP30, ATSNAP30	soluble N-ethylmaleimide-sensitive factor adaptor protein 30	0	0	0	0.101094	0.284825	0	0	13.3036	14.7978	_	_	U	U
AT1G13900	Chr1:4753145-4755580[-]	protein_coding_gene	#N/A	Purple acid phosphatases superfamily protein	10.9366	12.263	14.662	14.942	15.2472	0.165148	0.422917	0.450209	0.47938	_	_	_	_
AT1G13910	Chr1:4755784-4757991[+]	protein_coding_gene	#N/A	Leucine-rich repeat (LRR) family protein	3.23677	4.07405	4.52549	4.49979	5.58341	0.331908	0.483518	0.475302	0.78659	_	_	_	_
AT1G13920	Chr1:4758188-4759754[+]	protein_coding_gene	#N/A	Remorin family protein	2.0924	1.94823	2.54562	2.47749	3.44995	-0.102994	0.282857	0.243719	0.721414	_	_	_	_
AT1G13930	Chr1:4761012-4762666[+]	protein_coding_gene	#N/A	Involved in response to salt stress. Knockout mutants are hypersensitive to salt stress.	268.487	527.818	1922.09	393.242	2628.02	0.975188	2.83975	0.550565	3.29105	_	U	_	U
AT1G13940	Chr1:4762703-4766749[-]	protein_coding_gene	#N/A	Plant protein of unknown function (DUF863)	8.86758	8.48453	7.87879	8.43425	6.96476	-0.0637056	-0.170566	-0.0722806	-0.348466	_	_	_	_
AT1G13950	Chr1:4773576-4774867[+]	protein_coding_gene	EIF-5A, ELF5A-1, ATELF5A-1, EIF5A	eukaryotic elongation factor 5A-1	37.5918	36.2965	37.5102	29.0576	33.9588	-0.0505875	-0.00313504	-0.371502	-0.146632	_	_	_	_
AT1G13960	Chr1:4776463-4779400[+]	protein_coding_gene	WRKY4	WRKY DNA-binding protein 4	12.2325	12.7833	18.2263	17.8495	20.4061	0.063541	0.575302	0.545164	0.738281	_	_	_	_
AT1G13970	Chr1:4779523-4782542[-]	protein_coding_gene	#N/A	Protein of unknown function (DUF1336)	1.534	1.87703	2.89964	1.24327	1.34324	0.291152	0.918571	-0.303157	-0.19158	_	_	_	_
AT1G13980	Chr1:4788463-4794654[+]	protein_coding_gene	GN	sec7 domain-containing protein	11.08	13.6254	16.285	12.6684	10.2557	0.29834	0.555585	0.193276	-0.111532	_	_	_	_
AT1G13990	Chr1:4794756-4796597[+]	protein_coding_gene	#N/A	unknown protein; FUNCTIONS IN: molecular_function unknown; INVOLVED IN: biological_process unknown; LOCATED IN: chloroplast; EXPRESSED IN: 23 plant structures; EXPRESSED DURING: 13 growth stages; CONTAINS InterPro DOMAIN/s: Protein of unknown function DUF3110 (InterPro:IPR021503); Has 4 Blast hits to 4 proteins in 1 species: Archae - 0; Bacteria - 0; Metazoa - 0; Fungi - 0; Plants - 4; Viruses - …	53.2521	36.5326	65.493	39.6975	54.0418	-0.543654	0.298502	-0.42379	0.0212373	_	_	_	_
AT1G14000	Chr1:4797358-4800283[+]	protein_coding_gene	VIK	VH1-interacting kinase	41.9678	46.5361	56.9486	51.188	51.8342	0.149067	0.440377	0.286523	0.304621	_	_	_	_
AT1G14010	Chr1:4800169-4801850[-]	protein_coding_gene	#N/A	emp24/gp25L/p24 family/GOLD family protein	56.9068	59.6962	55.3159	49.0115	52.9531	0.069038	-0.0409068	-0.215481	-0.103886	_	_	_	_
AT1G14020	Chr1:4802720-4805375[+]	protein_coding_gene	#N/A	O-fucosyltransferase family protein	9.26356	9.849	9.0183	10.2951	9.56864	0.0884104	-0.0387112	0.152319	0.0467471	_	_	_	_
AT1G14030	Chr1:4805306-4807517[-]	protein_coding_gene	#N/A	Rubisco methyltransferase family protein	23.2958	18.887	20.3652	18.5116	17.7914	-0.302676	-0.193964	-0.33164	-0.38889	_	_	_	_
AT1G14040	Chr1:4810488-4814543[+]	protein_coding_gene	#N/A	EXS (ERD1/XPR1/SYG1) family protein	6.2004	4.33917	5.73313	18.4342	15.8602	-0.514941	-0.113038	1.57195	1.35498	_	_	U	U
AT1G14048	Chr1:4815683-4815988[-]	protein_coding_gene	#N/A	GCK domain-containing protein	0.0587634	0	0	0.269454	0.635559	-12.5209	-12.5209	2.19686	3.43481	_	_	_	U
AT1G14060	Chr1:4817144-4818020[-]	protein_coding_gene	#N/A	GCK domain-containing protein	45.0915	42.9015	30.2711	33.7446	31.5462	-0.0718274	-0.574914	-0.418199	-0.515389	_	_	_	_
AT1G14070	Chr1:4818548-4820150[+]	protein_coding_gene	FUT7	fucosyltransferase 7	3.66154	5.36664	7.57316	3.78864	3.25236	0.551567	1.04844	0.0492294	-0.170963	_	U	_	_
AT1G14080	Chr1:4822528-4824414[+]	protein_coding_gene	FUT6, ATFUT6	fucosyltransferase 6	2.47925	1.89238	0.845237	1.34296	1.48976	-0.3897	-1.55246	-0.884482	-0.73482	_	D	_	_
AT1G14090	Chr1:4824433-4827436[-]	pseudogene	#N/A	pseudogene, pentatricopeptide (PPR) repeat-containing protein, contains Pfam profile PF01535: PPR repeat; blastp match of 33% identity and 1.5e-16 P-value to GP	2.03986	1.67949	1.70863	2.25959	1.76745	-0.280445	-0.255629	0.14759	-0.2068	_	_	_	_
AT1G14100	Chr1:4827961-4829587[+]	protein_coding_gene	FUT8	fucosyltransferase 8	0.0641174	0.177284	0.0920463	0.155103	0.182796	1.46713	0.521576	1.27431	1.5113	U	_	U	U
AT1G14120	Chr1:4833518-4835089[-]	protein_coding_gene	#N/A	2-oxoglutarate (2OG) and Fe(II)-dependent oxygenase superfamily protein	18.2969	14.275	9.55038	16.5919	14.7738	-0.358108	-0.937968	-0.14112	-0.308558	_	_	_	_
AT1G14130	Chr1:4835724-4837616[-]	protein_coding_gene	#N/A	2-oxoglutarate (2OG) and Fe(II)-dependent oxygenase superfamily protein	13.417	11.7252	13.5253	14.192	13.1206	-0.194449	0.0115985	0.0810157	-0.0322284	_	_	_	_
AT1G14140	Chr1:4837927-4839633[-]	protein_coding_gene	#N/A	Mitochondrial substrate carrier family protein	11.4939	10.3455	9.74806	9.15826	9.48329	-0.151865	-0.237681	-0.327723	-0.277409	_	_	_	_
AT1G14150	Chr1:4839853-4840751[+]	protein_coding_gene	PQL1, PQL2	PsbQ-like 2	38.1865	22.1462	16.9144	24.5069	26.3188	-0.786003	-1.17481	-0.639874	-0.536969	_	D	_	_
AT1G14160	Chr1:4840697-4841848[-]	protein_coding_gene	#N/A	Uncharacterised protein family (UPF0497)	3.79798	2.5675	1.54894	1.5385	1.33854	-0.564866	-1.29395	-1.3037	-1.50457	_	D	D	D
AT1G14170	Chr1:4843234-4845847[-]	protein_coding_gene	#N/A	RNA-binding KH domain-containing protein	10.9549	14.5675	23.9915	15.0544	16.5452	0.411177	1.13095	0.458609	0.594836	_	U	_	_
AT1G14180	Chr1:4847162-4849207[+]	protein_coding_gene	#N/A	RING/U-box superfamily protein	4.98239	3.92889	4.00989	3.01516	3.2479	-0.342715	-0.313275	-0.724602	-0.617329	_	_	_	_
AT1G14182	Chr1:4849448-4849826[-]	pseudogene	SCRL28	Encodes a member of a family of small, secreted, cysteine rich proteins with sequence similarity to SCR (S locus cysteine-rich protein).	0.712567	0.299214	0.260409	0.065348	0.0700619	-1.25182	-1.45221	-3.44661	-3.34614	_	_	D	D
AT1G14185	Chr1:4850274-4852096[+]	protein_coding_gene	#N/A	Glucose-methanol-choline (GMC) oxidoreductase family protein	2.11282	0.883819	0.570429	1.09352	0.753257	-1.25734	-1.88903	-0.950184	-1.48794	D	D	_	D
AT1G14190	Chr1:4852802-4854307[+]	protein_coding_gene	#N/A	Glucose-methanol-choline (GMC) oxidoreductase family protein	2.18257	1.73836	1.25242	2.02033	0.977757	-0.328299	-0.801305	-0.111436	-1.15847	_	_	_	D
AT1G14200	Chr1:4854384-4855200[-]	protein_coding_gene	#N/A	RING/U-box superfamily protein	18.4723	3.29983	7.29661	1.27647	7.21021	-2.4849	-1.34006	-3.85512	-1.35725	D	D	D	D
AT1G14205	Chr1:4855533-4856930[+]	protein_coding_gene	#N/A	Ribosomal L18p/L5e family protein	9.88095	5.58736	7.66342	7.03246	6.49135	-0.822482	-0.366661	-0.49062	-0.60613	_	_	_	_
AT1G14210	Chr1:4856778-4857964[-]	protein_coding_gene	#N/A	Ribonuclease T2 family protein	67.3081	57.0216	40.2487	47.2718	42.7977	-0.239272	-0.741838	-0.5098	-0.653247	_	_	_	_
AT1G14220	Chr1:4858642-4859601[-]	protein_coding_gene	#N/A	Ribonuclease T2 family protein	0.445252	0.205534	0.124617	0.569326	0.498914	-1.11521	-1.83704	0.354626	0.164166	D	D	_	_
AT1G14230	Chr1:4861266-4864094[+]	protein_coding_gene	#N/A	GDA1/CD39 nucleoside phosphatase family protein	12.4795	12.7022	14.0433	13.9026	14.8513	0.0255182	0.170322	0.155794	0.251029	_	_	_	_
AT1G14240	Chr1:4864902-4868000[+]	protein_coding_gene	#N/A	GDA1/CD39 nucleoside phosphatase family protein	1.71086	2.06912	2.06379	1.51994	1.33773	0.274294	0.270573	-0.170706	-0.354932	_	_	_	_
AT1G14250	Chr1:4868452-4871488[+]	protein_coding_gene	#N/A	GDA1/CD39 nucleoside phosphatase family protein	8.34492	7.3121	5.66117	11.5912	15.6215	-0.190612	-0.559797	0.474059	0.904562	_	_	_	_
AT1G14260	Chr1:4872856-4874907[+]	protein_coding_gene	#N/A	RING/FYVE/PHD zinc finger superfamily protein	0.959771	0.701438	0.648154	1.838	1.39021	-0.452369	-0.566346	0.937367	0.534536	_	_	_	_
AT1G14270	Chr1:4874875-4877248[-]	protein_coding_gene	#N/A	CAAX amino terminal protease family protein	41.8697	34.1078	32.1784	36.9794	34.2208	-0.295805	-0.379814	-0.179185	-0.291033	_	_	_	_
AT1G14280	Chr1:4877627-4879149[+]	protein_coding_gene	PKS2	phytochrome kinase substrate 2	46.6149	38.7631	28.9404	34.2969	14.0542	-0.266107	-0.687706	-0.442713	-1.72979	_	_	_	D
AT1G14290	Chr1:4880051-4881964[-]	protein_coding_gene	SBH2	sphingoid base hydroxylase 2	54.0928	41.1526	41.9551	40.4822	27.1925	-0.394453	-0.36659	-0.418149	-0.992228	_	_	_	_
AT1G14300	Chr1:4882376-4884791[-]	protein_coding_gene	#N/A	ARM repeat superfamily protein	23.4659	19.6893	14.4757	20.9643	18.8964	-0.253154	-0.696932	-0.162631	-0.312454	_	_	_	_
AT1G14310	Chr1:4885044-4886793[+]	protein_coding_gene	#N/A	Haloacid dehalogenase-like hydrolase (HAD) superfamily protein	22.9411	18.1523	16.8878	16.9045	16.0721	-0.337782	-0.441953	-0.440527	-0.513376	_	_	_	_
AT1G14320	Chr1:4888214-4889661[+]	protein_coding_gene	SAC52, RPL10A	Ribosomal protein L16p/L10e family protein	1151.09	1168.48	1066.48	946.361	1114.26	0.0216324	-0.110144	-0.282538	-0.0469147	_	_	_	_
AT1G14330	Chr1:4890118-4892251[-]	protein_coding_gene	#N/A	Galactose oxidase/kelch repeat superfamily protein	11.9027	11.0381	17.0109	10.5097	11.6324	-0.108797	0.51517	-0.179567	-0.0331401	_	_	_	_
AT1G14340	Chr1:4897346-4898961[+]	protein_coding_gene	#N/A	RNA-binding (RRM/RBD/RNP motifs) family protein	16.7057	12.608	12.385	13.7787	20.8788	-0.406001	-0.431746	-0.2779	0.321698	_	_	_	_
AT1G14345	Chr1:4899145-4899979[+]	protein_coding_gene	#N/A	NAD(P)-linked oxidoreductase superfamily protein	90.2307	79.5354	64.1445	48.9224	46.1731	-0.182021	-0.492293	-0.883123	-0.966566	_	_	_	_
AT1G14350	Chr1:4907953-4911168[+]	protein_coding_gene	FLP, MYB124	Duplicated homeodomain-like superfamily protein	7.69824	11.6243	16.7239	8.29949	13.3582	0.594543	1.11931	0.108494	0.795124	_	U	_	_
AT1G14360	Chr1:4911093-4913152[-]	protein_coding_gene	ATUTR3, UTR3	UDP-galactose transporter 3	31.3219	19.5136	18.2557	13.018	17.7533	-0.682691	-0.778824	-1.26666	-0.819084	_	_	D	_
AT1G14370	Chr1:4915576-4918138[+]	protein_coding_gene	APK2A, PBL2	protein kinase 2A	9.42759	8.02352	10.6655	16.1122	13.9258	-0.232653	0.177991	0.773192	0.562799	_	_	_	_
AT1G14380	Chr1:4918010-4921596[-]	protein_coding_gene	IQD28	IQ-domain 28	15.9886	14.6028	14.4443	13.8055	13.5826	-0.130799	-0.146543	-0.2118	-0.235284	_	_	_	_
AT1G14390	Chr1:4924277-4926794[+]	protein_coding_gene	#N/A	Leucine-rich repeat protein kinase family protein	1.13073	1.53306	1.12243	1.3983	0.84283	0.439156	-0.0106289	0.306417	-0.423937	_	_	_	_
AT1G14400	Chr1:4927011-4928690[-]	protein_coding_gene	UBC1, ATUBC1	ubiquitin carrier protein 1	169.112	139.378	147.151	134.681	171.033	-0.278976	-0.200682	-0.328433	0.0162957	_	_	_	_
AT1G14410	Chr1:4929123-4930904[-]	protein_coding_gene	ATWHY1, PTAC1, WHY1	ssDNA-binding transcriptional regulator	32.913	31.8682	25.1499	24.4367	26.115	-0.04654	-0.388105	-0.429608	-0.333779	_	_	_	_
AT1G14420	Chr1:4931566-4933515[-]	protein_coding_gene	AT59	Pectate lyase family protein	0.246613	0.0443231	0.0263899	0.113733	0.0511801	-2.47585	-3.2237	-1.11653	-2.26837	D	D	D	D
AT1G14430	Chr1:4934120-4936100[+]	protein_coding_gene	#N/A	glyoxal oxidase-related protein	5.09444	2.13226	1.57349	1.19522	0.757857	-1.25654	-1.69495	-2.09164	-2.74891	D	D	D	D
AT1G14440	Chr1:4938824-4940903[-]	protein_coding_gene	AtHB31, HB31, ZHD4	homeobox protein 31	10.2942	9.2863	8.56786	8.21649	6.78039	-0.148656	-0.264825	-0.325237	-0.602391	_	_	_	_
AT1G14450	Chr1:4946218-4947576[-]	protein_coding_gene	#N/A	NADH dehydrogenase (ubiquinone)s	159.159	154.404	152.806	108.626	172.733	-0.0437586	-0.0587675	-0.551099	0.118075	_	_	_	_
AT1G14455	Chr1:4947819-4948400[-]	protein_coding_gene	#N/A	unknown protein; FUNCTIONS IN: molecular_function unknown; INVOLVED IN: biological_process unknown; LOCATED IN: endomembrane system; Has 30201 Blast hits to 17322 proteins in 780 species: Archae - 12; Bacteria - 1396; Metazoa - 17338; Fungi - 3422; Plants - 5037; Viruses - 0; Other Eukaryotes - 2996 (source: NCBI BLink).	0.179119	0.17663	0.109768	0.26772	0.524732	-0.0201868	-0.70641	0.57978	1.55061	_	_	_	U
AT1G14460	Chr1:4948748-4952927[-]	protein_coding_gene	#N/A	AAA-type ATPase family protein	5.54379	6.93624	6.89751	6.94434	5.91455	0.323281	0.315203	0.324964	0.0933956	_	_	_	_
AT1G14470	Chr1:4954080-4955702[+]	protein_coding_gene	#N/A	Pentatricopeptide repeat (PPR) superfamily protein	1.18753	1.63681	1.76954	2.46366	2.26031	0.46292	0.575406	1.05283	0.928551	_	_	U	_
AT1G14480	Chr1:4956257-4958076[+]	protein_coding_gene	#N/A	Ankyrin repeat family protein	2.02553	2.77802	2.5417	8.44855	9.37548	0.455756	0.327493	2.0604	2.21059	_	_	U	U
AT1G14490	Chr1:4958514-4959325[-]	protein_coding_gene	#N/A	Predicted AT-hook DNA-binding family protein	0.952202	1.0031	0.931131	1.01949	0.9028	0.0751251	-0.0322832	0.0985071	-0.0768604	_	_	_	_
AT1G14510	Chr1:4961886-4964428[-]	protein_coding_gene	AL7	alfin-like 7	56.6205	41.5282	35.1507	43.6468	45.3517	-0.447233	-0.687771	-0.375449	-0.320168	_	_	_	_
AT1G14518	Chr1:4966810-4967493[-]	other_RNA	#N/A	other RNA	0.0150023	0.0156959	0.110599	0.0549554	0.0728947	0.0651616	2.88125	1.87238	2.27987	_	U	_	_
AT1G14520	Chr1:4968142-4970311[-]	protein_coding_gene	MIOX1	myo-inositol oxygenase 1	5.36254	13.8232	62.0444	6.92301	6.99132	1.3661	3.53231	0.368482	0.382648	U	U	_	_
AT1G14530	Chr1:4970858-4973726[-]	protein_coding_gene	THH1	Protein of unknown function (DUF1084)	4.72719	7.37985	10.4145	6.96664	6.48565	0.642608	1.13954	0.559479	0.456267	_	U	_	_
AT1G14540	Chr1:4974067-4975705[-]	protein_coding_gene	#N/A	Peroxidase superfamily protein	2.68795	2.18894	2.17995	12.0659	8.90338	-0.296273	-0.30221	2.16635	1.72784	_	_	U	U
AT1G14550	Chr1:4979028-4980324[+]	protein_coding_gene	#N/A	Peroxidase superfamily protein	0.348868	0.199915	0.271381	1.01378	0.422059	-0.803264	-0.36235	1.53896	0.274756	_	_	U	_
AT1G14560	Chr1:4980672-4983284[+]	protein_coding_gene	#N/A	Mitochondrial substrate carrier family protein	7.35483	11.6337	10.4303	11.4948	9.83637	0.661545	0.504016	0.644217	0.419434	_	_	_	_
AT1G14570	Chr1:4983535-4987375[+]	protein_coding_gene	#N/A	UBX domain-containing protein	38.1316	37.4884	36.3964	35.7425	33.6486	-0.0245428	-0.0671913	-0.0933465	-0.180441	_	_	_	_
AT1G14580	Chr1:4989562-4992732[+]	protein_coding_gene	#N/A	C2H2-like zinc finger protein	22.7159	22.7696	22.1007	19.5431	17.6945	0.00340648	-0.0396104	-0.217043	-0.360401	_	_	_	_
AT1G14590	Chr1:4998816-5000643[-]	protein_coding_gene	#N/A	Nucleotide-diphospho-sugar transferase family protein	8.7758	9.2595	9.34445	8.77335	9.69641	0.0774036	0.090579	-0.000402823	0.14392	_	_	_	_
AT1G14600	Chr1:5001011-5003370[-]	protein_coding_gene	#N/A	Homeodomain-like superfamily protein	7.38959	7.59833	3.93293	4.3872	4.67829	0.040188	-0.909888	-0.752193	-0.659512	_	_	_	_
AT1G14610	Chr1:5008244-5014533[-]	protein_coding_gene	TWN2, VALRS	valyl-tRNA synthetase / valine--tRNA ligase (VALRS)	50.1722	57.2841	57.6124	59.5256	43.355	0.191247	0.199491	0.246622	-0.21069	_	_	_	_
AT1G14620	Chr1:5014753-5016604[-]	protein_coding_gene	DECOY	decoy	44.6505	41.0243	31.0572	36.1254	37.6716	-0.122198	-0.523748	-0.305663	-0.245199	_	_	_	_
AT1G14630	Chr1:5019955-5021537[+]	protein_coding_gene	#N/A	unknown protein; BEST Arabidopsis thaliana protein match is: unknown protein (TAIR:AT2G01990.1); Has 125 Blast hits to 123 proteins in 14 species: Archae - 0; Bacteria - 0; Metazoa - 0; Fungi - 0; Plants - 125; Viruses - 0; Other Eukaryotes - 0 (source: NCBI BLink).	4.06116	2.03846	2.39031	3.88954	2.20484	-0.994409	-0.764692	-0.0622922	-0.881215	_	_	_	_
AT1G14640	Chr1:5023656-5025955[+]	protein_coding_gene	#N/A	SWAP (Suppressor-of-White-APricot)/surp domain-containing protein	1.66821	2.29914	1.76964	5.71093	2.29102	0.462791	0.0851545	1.77542	0.457687	_	_	U	_
AT1G14642	Chr1:5026364-5026585[+]	protein_coding_gene	#N/A	unknown protein; FUNCTIONS IN: molecular_function unknown; INVOLVED IN: biological_process unknown; LOCATED IN: cellular_component unknown; Has 0 Blast hits to 0 proteins in 0 species (source: NCBI BLink).	12.6862	13.3176	8.69288	11.6343	9.35511	0.0700741	-0.545353	-0.124875	-0.439433	_	_	_	_
AT1G14650	Chr1:5027662-5031779[+]	protein_coding_gene	#N/A	SWAP (Suppressor-of-White-APricot)/surp domain-containing protein / ubiquitin family protein	28.0215	30.3756	27.7453	33.8335	25.3475	0.116379	-0.0142908	0.271918	-0.144691	_	_	_	_
AT1G14660	Chr1:5031950-5036477[-]	protein_coding_gene	NHX8	Na+/H+ exchanger 8	2.14565	2.27059	2.32209	3.23414	2.24139	0.0816521	0.114009	0.591965	0.0629786	_	_	_	_
AT1G14670	Chr1:5037612-5040528[+]	protein_coding_gene	#N/A	Endomembrane protein 70 protein family	98.0908	129.181	144.265	116.361	130.715	0.397204	0.556532	0.246418	0.414235	_	_	_	_
AT1G14680	Chr1:5040861-5041733[+]	protein_coding_gene	#N/A	unknown protein; BEST Arabidopsis thaliana protein match is: unknown protein (TAIR:AT4G09060.1); Has 8132 Blast hits to 6366 proteins in 685 species: Archae - 171; Bacteria - 671; Metazoa - 4046; Fungi - 445; Plants - 318; Viruses - 23; Other Eukaryotes - 2458 (source: NCBI BLink).	2.00271	2.58325	2.44339	2.91599	3.06932	0.367232	0.286929	0.54203	0.615963	_	_	_	_
AT1G14685	Chr1:5042323-5044294[+]	protein_coding_gene	BPC2, BBR/BPC2, ATBPC2	basic pentacysteine 2	34.6348	24.0221	33.1347	22.5088	23.9809	-0.52786	-0.0638795	-0.621733	-0.530336	_	_	_	_
AT1G14686	Chr1:5045781-5046800[-]	protein_coding_gene	#N/A	ENTH/ANTH/VHS superfamily protein	0.0889004	0.0328685	0.0933656	0.0450023	0.0462949	-1.43521	0.0706934	-0.982033	-0.941187	_	_	_	_
AT1G14687	Chr1:5047803-5048612[+]	protein_coding_gene	AtHB32, HB32, ZHD14	homeobox protein 32	2.68794	2.40479	2.2874	1.88545	2.73967	-0.160589	-0.232791	-0.51159	0.0275011	_	_	_	_
AT1G14688	Chr1:5049526-5050983[-]	protein_coding_gene	#N/A	FUNCTIONS IN: molecular_function unknown; INVOLVED IN: biological_process unknown; LOCATED IN: cellular_component unknown; CONTAINS InterPro DOMAIN/s: E3 Ubiquitin ligase (InterPro:IPR022170); Has 30201 Blast hits to 17322 proteins in 780 species: Archae - 12; Bacteria - 1396; Metazoa - 17338; Fungi - 3422; Plants - 5037; Viruses - 0; Other Eukaryotes - 2996 (source: NCBI BLink).	0.0142569	0.0146773	0.0388849	0.079222	0.368029	0.0418973	1.44691	2.47341	4.68911	_	_	_	U
AT1G14690	Chr1:5051760-5055252[-]	protein_coding_gene	MAP65-7	microtubule-associated protein 65-7	15.135	11.9879	13.3746	13.6979	14.482	-0.336309	-0.178393	-0.143934	-0.0636278	_	_	_	_
AT1G14700	Chr1:5058680-5061136[+]	protein_coding_gene	PAP3, ATPAP3	purple acid phosphatase 3	28.9636	16.5422	30.6862	13.8908	10.5721	-0.808089	0.083349	-1.06011	-1.45398	_	_	D	D
AT1G14710	Chr1:5061866-5065178[-]	protein_coding_gene	#N/A	hydroxyproline-rich glycoprotein family protein	44.1548	56.893	50.9673	52.9382	36.2532	0.365681	0.207002	0.261739	-0.284462	_	_	_	_
AT1G14720	Chr1:5066636-5068645[-]	protein_coding_gene	XTR2, EXGT-A2, ATXTH28, XTH28	xyloglucan endotransglucosylase/hydrolase 28	56.8201	38.7725	60.4624	37.3753	37.6469	-0.551367	0.0896369	-0.604316	-0.59387	_	_	_	_
AT1G14730	Chr1:5073105-5074779[+]	protein_coding_gene	#N/A	Cytochrome b561/ferric reductase transmembrane protein family	7.91126	15.2254	96.4706	7.04586	5.98303	0.9445	3.60811	-0.167131	-0.403031	_	U	_	_
AT1G14740	Chr1:5075213-5077791[-]	protein_coding_gene	#N/A	Protein of unknown function (DUF1423)	42.4179	32.5967	32.3174	52.6868	40.4788	-0.379947	-0.392362	0.312768	-0.0675067	_	_	_	_
AT1G14750	Chr1:5079407-5082520[-]	protein_coding_gene	SDS	Cyclin family protein	0.709219	0.820942	0.370025	0.922107	0.674657	0.211046	-0.93859	0.378698	-0.0720759	_	_	_	_
AT1G14760	Chr1:5084352-5085213[-]	protein_coding_gene	KNATM	KNOX Arabidopsis thaliana meinox	1.22522	1.2481	0.824521	2.239	1.23072	0.0266925	-0.571407	0.869808	0.0064617	_	_	_	_
AT1G14770	Chr1:5086626-5088846[-]	protein_coding_gene	#N/A	RING/FYVE/PHD zinc finger superfamily protein	4.39157	4.93083	5.86743	4.39638	3.24814	0.167093	0.417991	0.00157929	-0.435122	_	_	_	_
AT1G14780	Chr1:5090990-5094152[+]	protein_coding_gene	#N/A	MAC/Perforin domain-containing protein	4.93661	3.61003	4.3882	9.57863	10.8865	-0.451509	-0.169891	0.956297	1.14095	_	_	_	U
AT1G14790	Chr1:5093961-5098032[-]	protein_coding_gene	RDR1, ATRDRP1	RNA-dependent RNA polymerase 1	3.40092	3.53737	4.92549	4.13801	2.83938	0.0567519	0.534341	0.283011	-0.260348	_	_	_	_
AT1G14810	Chr1:5102424-5104695[-]	protein_coding_gene	#N/A	semialdehyde dehydrogenase family protein	125.241	125.124	86.1087	103.958	105.808	-0.00134839	-0.540476	-0.268706	-0.243258	_	_	_	_
AT1G14820	Chr1:5105018-5106954[-]	protein_coding_gene	#N/A	Sec14p-like phosphatidylinositol transfer family protein	11.3243	11.4551	15.0614	12.0529	20.6259	0.0165682	0.411434	0.0899584	0.865035	_	_	_	_
AT1G14830	Chr1:5107421-5111670[-]	protein_coding_gene	ADL1C, ADL5, DRP1C, DL1C	DYNAMIN-like 1C	49.3239	59.8333	59.8369	51.2644	52.8374	0.278662	0.278749	0.0556704	0.0992726	_	_	_	_
AT1G14840	Chr1:5111955-5115497[-]	protein_coding_gene	MAP70-4	microtubule-associated proteins 70-4	11.958	13.2478	13.092	14.0507	10.1604	0.147777	0.130709	0.232666	-0.235019	_	_	_	_
AT1G14850	Chr1:5116696-5123259[-]	protein_coding_gene	NUP155	nucleoporin 155	11.064	12.5325	12.786	13.2556	9.65488	0.179801	0.208692	0.260729	-0.196543	_	_	_	_
AT1G14860	Chr1:5124742-5126151[+]	protein_coding_gene	atnudt18, NUDT18	nudix hydrolase homolog 18	8.66756	6.43913	5.17777	7.05615	10.5431	-0.42876	-0.743294	-0.296744	0.282601	_	_	_	_
AT1G14870	Chr1:5128375-5129523[-]	protein_coding_gene	PCR2	PLANT CADMIUM RESISTANCE 2	95.7193	59.9144	49.2007	150.066	169.918	-0.675907	-0.960131	0.648715	0.827957	_	_	_	_
AT1G14880	Chr1:5132535-5133716[-]	protein_coding_gene	PCR1	PLANT CADMIUM RESISTANCE 1	0.56887	0.93909	1.10192	0.663489	1.0637	0.723154	0.953836	0.22197	0.902909	_	_	_	_
AT1G14890	Chr1:5137014-5137957[+]	protein_coding_gene	#N/A	Plant invertase/pectin methylesterase inhibitor superfamily protein	91.3837	27.1004	49.0983	35.8	39.7917	-1.75362	-0.896264	-1.35198	-1.19947	D	_	D	D
AT1G14900	Chr1:5138334-5139432[-]	protein_coding_gene	HMGA	high mobility group A	56.4796	42.5862	42.5943	27.6814	18.057	-0.407344	-0.407069	-1.02881	-1.64517	_	_	D	D
AT1G14910	Chr1:5139712-5143689[-]	protein_coding_gene	#N/A	ENTH/ANTH/VHS superfamily protein	20.5755	19.71	21.1401	17.3077	15.0569	-0.0619997	0.0390547	-0.249513	-0.450502	_	_	_	_
AT1G14920	Chr1:5149226-5151354[+]	protein_coding_gene	GAI, RGA2	GRAS family transcription factor family protein	23.6951	27.3353	29.0178	16.4332	10.958	0.206176	0.292349	-0.527975	-1.1126	_	_	_	D
AT1G14930	Chr1:5152263-5153084[-]	protein_coding_gene	#N/A	Polyketide cyclase/dehydrase and lipid transport superfamily protein	1.66309	1.04916	1.12546	0.85359	1.47354	-0.664626	-0.563347	-0.962243	-0.174579	_	_	_	_
AT1G14960	Chr1:5159199-5160083[-]	protein_coding_gene	#N/A	Polyketide cyclase/dehydrase and lipid transport superfamily protein	2.2708	1.81432	0.301119	1.49603	1.76679	-0.32377	-2.91475	-0.602058	-0.362068	_	D	_	_
AT1G14970	Chr1:5161949-5164917[-]	protein_coding_gene	#N/A	O-fucosyltransferase family protein	3.57898	3.29757	2.84554	3.50611	2.80417	-0.118145	-0.330845	-0.0296771	-0.351974	_	_	_	_
AT1G14980	Chr1:5165628-5166745[-]	protein_coding_gene	CPN10	chaperonin 10	430.456	343.673	263.487	247.699	246.844	-0.324829	-0.708134	-0.797278	-0.802266	_	_	_	_
AT1G14990	Chr1:5167031-5168264[-]	protein_coding_gene	#N/A	unknown protein; FUNCTIONS IN: molecular_function unknown; INVOLVED IN: biological_process unknown; LOCATED IN: endomembrane system; EXPRESSED IN: 22 plant structures; EXPRESSED DURING: 13 growth stages.	24.9247	27.5633	34.4791	23.8188	29.1194	0.145172	0.468146	-0.0654754	0.224404	_	_	_	_
AT1G15000	Chr1:5168596-5170066[+]	protein_coding_gene	scpl50	serine carboxypeptidase-like 50	22.0872	13.5053	11.4149	12.4662	11.5296	-0.709684	-0.952292	-0.825188	-0.937867	_	_	_	_
AT1G15002	Chr1:5169940-5170435[-]	other_RNA	#N/A	Potential natural antisense gene, locus overlaps with AT1G15000	1.06115	1.30988	0.678848	1.15758	2.5606	0.303803	-0.64446	0.125482	1.27085	_	_	_	U
AT1G15010	Chr1:5171207-5171742[+]	protein_coding_gene	#N/A	unknown protein; BEST Arabidopsis thaliana protein match is: unknown protein (TAIR:AT2G01300.1); Has 71 Blast hits to 71 proteins in 13 species: Archae - 0; Bacteria - 2; Metazoa - 0; Fungi - 0; Plants - 69; Viruses - 0; Other Eukaryotes - 0 (source: NCBI BLink).	16.9175	5.31682	5.46265	63.1304	59.8985	-1.66988	-1.63084	1.89982	1.824	D	D	U	U
AT1G15020	Chr1:5173097-5176223[-]	protein_coding_gene	ATQSOX1, QSO2, QSOX1	quiescin-sulfhydryl oxidase 1	10.5546	9.5797	9.21376	10.1984	9.93878	-0.139819	-0.19601	-0.049529	-0.0867311	_	_	_	_
AT1G15030	Chr1:5177529-5180049[+]	protein_coding_gene	#N/A	Protein of unknown function (DUF789)	27.6623	21.9709	21.4758	33.4323	32.7563	-0.332327	-0.365209	0.273321	0.243851	_	_	_	_
AT1G15040	Chr1:5179887-5181389[-]	protein_coding_gene	#N/A	Class I glutamine amidotransferase-like superfamily protein	25.086	1.8398	0.992367	36.7774	29.2027	-3.76925	-4.65985	0.551937	0.219219	D	D	_	_
AT1G15050	Chr1:5182256-5183243[-]	protein_coding_gene	IAA34	indole-3-acetic acid inducible 34	0.771833	0.567574	0.350079	1.01736	1.73092	-0.443473	-1.14059	0.398465	1.16517	_	D	_	U
AT1G15060	Chr1:5183607-5186974[-]	protein_coding_gene	#N/A	Uncharacterised conserved protein UCP031088, alpha/beta hydrolase	13.04	14.96	18.2074	17.3353	13.1037	0.198166	0.481581	0.410769	0.00703036	_	_	_	_
AT1G15080	Chr1:5187626-5189673[+]	protein_coding_gene	ATPAP2, ATLPP2, LPP2	lipid phosphate phosphatase 2	3.35399	3.27974	3.10882	4.33538	4.92992	-0.0322968	-0.109511	0.370279	0.555684	_	_	_	_
AT1G15100	Chr1:5193426-5194203[-]	protein_coding_gene	RHA2A	RING-H2 finger A2A	19.6223	15.1616	13.1563	95.1087	108.549	-0.372072	-0.57674	2.27708	2.46778	_	_	U	U
AT1G15110	Chr1:5199018-5202175[+]	protein_coding_gene	#N/A	phosphatidyl serine synthase family protein	8.71505	5.51664	7.75406	7.97338	9.76743	-0.659718	-0.168557	-0.128317	0.16447	_	_	_	_
AT1G15120	Chr1:5202648-5204193[+]	protein_coding_gene	#N/A	Ubiquinol-cytochrome C reductase hinge protein	391.013	375.513	383.22	304.282	394.106	-0.0583537	-0.0290437	-0.361808	0.0113671	_	_	_	_
AT1G15125	Chr1:5204625-5205912[+]	protein_coding_gene	#N/A	S-adenosyl-L-methionine-dependent methyltransferases superfamily protein	122.318	13.7845	7.75894	43.3553	15.1651	-3.14952	-3.97863	-1.49636	-3.01181	D	D	D	D
AT1G15130	Chr1:5206002-5209915[-]	protein_coding_gene	#N/A	Endosomal targeting BRO1-like domain-containing protein	29.281	34.3922	36.906	35.2998	27.7083	0.232117	0.33389	0.269695	-0.0796466	_	_	_	_
AT1G15140	Chr1:5210206-5212349[-]	protein_coding_gene	#N/A	FAD/NAD(P)-binding oxidoreductase	68.6285	69.0342	65.585	57.3054	43.6783	0.00850344	-0.0654419	-0.260137	-0.651891	_	_	_	_
AT1G15150	Chr1:5212615-5214858[+]	protein_coding_gene	#N/A	MATE efflux family protein	0.381206	0.309286	0.467982	0.277842	0.25905	-0.30162	0.295875	-0.456292	-0.557322	_	_	_	_
AT1G15160	Chr1:5215475-5217545[+]	protein_coding_gene	#N/A	MATE efflux family protein	0.0373821	0.0196121	0.0309875	0.021509	0.0587336	-0.930254	-0.270582	-0.797122	0.651698	_	_	_	_
AT1G15165	Chr1:5217719-5220113[-]	protein_coding_gene	#N/A	RING/FYVE/PHD zinc finger superfamily protein	2.39102	2.66222	2.64402	2.5652	2.36278	0.155003	0.145106	0.101445	-0.0171408	_	_	_	_
AT1G15170	Chr1:5220641-5222973[+]	protein_coding_gene	#N/A	MATE efflux family protein	13.0042	11.7113	12.6523	13.3211	10.9941	-0.151076	-0.0395779	0.0347355	-0.242248	_	_	_	_
AT1G15175	Chr1:5222913-5224121[-]	other_RNA	#N/A	other RNA	3.90513	1.6488	2.3445	1.54916	1.41336	-1.24395	-0.736088	-1.33388	-1.46624	D	_	D	D
AT1G15180	Chr1:5224385-5226702[+]	protein_coding_gene	#N/A	MATE efflux family protein	42.8658	32.2597	31.2856	33.4987	27.6113	-0.410094	-0.454328	-0.355722	-0.634568	_	_	_	_
AT1G15190	Chr1:5227053-5228202[+]	protein_coding_gene	#N/A	Fasciclin-like arabinogalactan family protein	0.235111	0.398539	0.248121	0.725115	0.927676	0.761354	0.0776986	1.62483	1.98023	_	_	U	U
AT1G15200	Chr1:5228300-5231184[-]	protein_coding_gene	#N/A	protein-protein interaction regulator family protein	31.9289	33.2541	31.3827	40.1322	28.6381	0.0586694	-0.0248934	0.329897	-0.156927	_	_	_	_
AT1G15210	Chr1:5231348-5236573[-]	protein_coding_gene	PDR7, ATPDR7	pleiotropic drug resistance 7	6.14442	5.96994	2.95503	10.9795	6.61586	-0.0415603	-1.0561	0.837463	0.106652	_	D	_	_
AT1G15215	Chr1:5238065-5240051[+]	protein_coding_gene	#N/A	BEST Arabidopsis thaliana protein match is: sequence-specific DNA binding transcription factors;sequence-specific DNA binding (TAIR:AT3G18380.1); Has 35333 Blast hits to 34131 proteins in 2444 species: Archae - 798; Bacteria - 22429; Metazoa - 974; Fungi - 991; Plants - 531; Viruses - 0; Other Eukaryotes - 9610 (source: NCBI BLink).	10.3933	8.07321	8.61908	8.66083	6.73713	-0.364439	-0.270048	-0.263076	-0.625447	_	_	_	_
AT1G15220	Chr1:5240029-5241538[-]	protein_coding_gene	ATCCMH, CCMH	cytochrome c biogenesis protein family	7.05389	7.10749	6.43966	6.89234	7.8473	0.0109211	-0.131434	-0.0334252	0.153777	_	_	_	_
AT1G15230	Chr1:5242198-5243227[-]	protein_coding_gene	#N/A	unknown protein; FUNCTIONS IN: molecular_function unknown; INVOLVED IN: biological_process unknown; LOCATED IN: cellular_component unknown; EXPRESSED IN: 24 plant structures; EXPRESSED DURING: 15 growth stages; Has 26 Blast hits to 26 proteins in 12 species: Archae - 0; Bacteria - 0; Metazoa - 0; Fungi - 0; Plants - 26; Viruses - 0; Other Eukaryotes - 0 (source: NCBI BLink).	19.2633	13.726	17.4658	12.3652	18.9512	-0.488943	-0.141322	-0.639569	-0.0235657	_	_	_	_
AT1G15240	Chr1:5243450-5248604[+]	protein_coding_gene	#N/A	Phox-associated domain;Phox-like;Sorting nexin, C-terminal	12.0486	12.1238	13.8054	14.4054	11.9965	0.00897643	0.196367	0.257744	-0.00625196	_	_	_	_
AT1G15250	Chr1:5248664-5249474[-]	protein_coding_gene	#N/A	Zinc-binding ribosomal protein family protein	83.7123	74.7515	57.8815	48.666	59.008	-0.163337	-0.532337	-0.782525	-0.504529	_	_	_	_
AT1G15260	Chr1:5249760-5250573[+]	protein_coding_gene	#N/A	unknown protein; BEST Arabidopsis thaliana protein match is: unknown protein (TAIR:AT3G16070.1); Has 28 Blast hits to 28 proteins in 7 species: Archae - 0; Bacteria - 0; Metazoa - 0; Fungi - 0; Plants - 28; Viruses - 0; Other Eukaryotes - 0 (source: NCBI BLink).	37.377	36.4535	53.4548	24.4921	30.947	-0.0360934	0.516169	-0.609834	-0.272351	_	_	_	_
AT1G15270	Chr1:5250650-5252121[-]	protein_coding_gene	#N/A	Translation machinery associated TMA7	544.372	564.624	646.371	415.278	594.743	0.0526976	0.24777	-0.390515	0.127674	_	_	_	_
AT1G15280	Chr1:5252315-5256753[+]	protein_coding_gene	#N/A	CASC3/Barentsz eIF4AIII binding	24.9459	26.8942	24.0056	32.5162	25.8903	0.108492	-0.0554317	0.382356	0.0536089	_	_	_	_
AT1G15290	Chr1:5257046-5264942[-]	protein_coding_gene	#N/A	Tetratricopeptide repeat (TPR)-like superfamily protein	31.1227	28.8639	18.2293	27.0622	26.0309	-0.108701	-0.771708	-0.201688	-0.257742	_	_	_	_
AT1G15300	Chr1:5265726-5268602[-]	transposable_element_gene	#N/A	transposable element gene	1.35617	1.89657	1.39066	1.96878	1.10919	0.483856	0.0362378	0.537765	-0.290031	_	_	_	_
AT1G15310	Chr1:5269019-5272058[-]	protein_coding_gene	ATHSRP54A, SRP54-1	signal recognition particle 54 kDa subunit	3.12708	4.35329	10.3783	3.50974	3.1797	0.477289	1.73068	0.166548	0.0240745	_	U	_	_
AT1G15330	Chr1:5274346-5275602[+]	protein_coding_gene	#N/A	Cystathionine beta-synthase (CBS) protein	0.254456	0.676923	1.46824	0.287049	0.502882	1.41154	2.52855	0.173874	0.982776	U	U	_	_
AT1G15340	Chr1:5275677-5277689[-]	protein_coding_gene	MBD10	methyl-CPG-binding domain 10	65.5683	54.5569	68.5135	53.7735	51.0482	-0.265237	0.0633898	-0.286103	-0.361138	_	_	_	_
AT1G15350	Chr1:5278260-5279877[-]	protein_coding_gene	#N/A	unknown protein; FUNCTIONS IN: molecular_function unknown; INVOLVED IN: biological_process unknown; LOCATED IN: chloroplast; EXPRESSED IN: 22 plant structures; EXPRESSED DURING: 12 growth stages; BEST Arabidopsis thaliana protein match is: unknown protein (TAIR:AT3G15770.2); Has 145 Blast hits to 145 proteins in 25 species: Archae - 0; Bacteria - 0; Metazoa - 0; Fungi - 0; Plants - 138; Viruses -…	37.8667	26.1728	41.2075	31.7192	36.4094	-0.532861	0.121977	-0.255573	-0.0566187	_	_	_	_
AT1G15360	Chr1:5283538-5284673[+]	protein_coding_gene	SHN1, WIN1	Integrase-type DNA-binding superfamily protein	0.0546889	0.0422546	0.0506017	0.0560484	0.119184	-0.372062	-0.112041	0.0354187	1.12373	_	_	_	_
AT1G15370	Chr1:5287047-5288577[+]	protein_coding_gene	#N/A	SNARE-like superfamily protein	75.2752	69.322	73.4259	59.0105	68.7172	-0.118861	-0.0358856	-0.351203	-0.131503	_	_	_	_
AT1G15380	Chr1:5290745-5292535[+]	protein_coding_gene	#N/A	Lactoylglutathione lyase / glyoxalase I family protein	30.3371	31.2339	14.4722	28.6128	28.969	0.0420295	-1.0678	-0.0844225	-0.0665733	_	D	_	_
AT1G15385	Chr1:5292756-5293265[-]	protein_coding_gene	#N/A	unknown protein; CONTAINS InterPro DOMAIN/s: Protein of unknown function DUF761, plant (InterPro:IPR008480); Has 6 Blast hits to 6 proteins in 3 species: Archae - 0; Bacteria - 0; Metazoa - 0; Fungi - 0; Plants - 6; Viruses - 0; Other Eukaryotes - 0 (source: NCBI BLink).	0.491283	0.328777	0.655474	0.394782	0.522227	-0.57943	0.415977	-0.315491	0.088121	_	_	_	_
AT1G15390	Chr1:5294629-5295797[+]	protein_coding_gene	PDF1A, ATDEF1	peptide deformylase 1A	49.3694	41.9252	34.7809	32.7031	37.8344	-0.235799	-0.505322	-0.59419	-0.383918	_	_	_	_
AT1G15400	Chr1:5295773-5296902[-]	protein_coding_gene	#N/A	unknown protein; FUNCTIONS IN: molecular_function unknown; INVOLVED IN: biological_process unknown; LOCATED IN: plasma membrane; EXPRESSED IN: 23 plant structures; EXPRESSED DURING: 13 growth stages; BEST Arabidopsis thaliana protein match is: unknown protein (TAIR:AT1G80180.1); Has 84 Blast hits to 84 proteins in 17 species: Archae - 0; Bacteria - 6; Metazoa - 0; Fungi - 0; Plants - 75; Viruses …	71.9322	41.9756	53.1407	36.3459	49.8148	-0.777087	-0.43682	-0.984845	-0.530063	_	_	_	_
AT1G15405	Chr1:5297875-5298166[-]	other_RNA	#N/A	other RNA	16.8897	15.4609	18.4554	14.4979	98.7088	-0.127519	0.127899	-0.2203	2.54703	_	_	_	U
AT1G15410	Chr1:5298324-5300927[+]	protein_coding_gene	#N/A	aspartate-glutamate racemase family	12.1182	5.16533	5.79124	7.21249	7.89524	-1.23024	-1.06523	-0.748605	-0.61812	D	D	_	_
AT1G15415	Chr1:5300742-5301412[-]	protein_coding_gene	#N/A	The protein encoded by this gene was identified as a part of pollen proteome by mass spec analysis. It has weak homology to LEA (late embryo abundant) proteins. Encodes protein phosphatase 2A (PP2A) B'gamma subunit. Targeted to nucleus and cytosol.	7.96081	4.03254	8.34919	6.8813	9.60488	-0.981225	0.0687209	-0.210234	0.270852	_	_	_	_
AT1G15420	Chr1:5301613-5303390[-]	protein_coding_gene	#N/A	CONTAINS InterPro DOMAIN/s: Small-subunit processome, Utp12 (InterPro:IPR007148); Has 764 Blast hits to 656 proteins in 193 species: Archae - 0; Bacteria - 42; Metazoa - 237; Fungi - 154; Plants - 85; Viruses - 23; Other Eukaryotes - 223 (source: NCBI BLink).	42.3554	36.4871	25.6943	40.0592	45.3699	-0.215159	-0.721097	-0.0804123	0.0991895	_	_	_	_
AT1G15430	Chr1:5304317-5306012[+]	protein_coding_gene	#N/A	Protein of unknown function (DUF1644)	11.6492	12.671	15.3316	21.0927	50.202	0.121299	0.396277	0.856512	2.10751	_	_	_	U
AT1G15440	Chr1:5306061-5309514[-]	protein_coding_gene	PWP2	periodic tryptophan protein 2	24.4011	24.0817	16.8277	22.6291	19.2131	-0.0190089	-0.536108	-0.108767	-0.344856	_	_	_	_
AT1G15460	Chr1:5310001-5314094[-]	protein_coding_gene	ATBOR4, BOR4	HCO3- transporter family	0.329627	1.97407	1.19475	0.244854	0.499769	2.58223	1.85777	-0.428898	0.600412	U	U	_	_
AT1G15470	Chr1:5315507-5317863[+]	protein_coding_gene	#N/A	Transducin/WD40 repeat-like superfamily protein	10.7901	12.7545	13.5683	10.7431	13.4281	0.241298	0.330531	-0.00629788	0.315547	_	_	_	_
AT1G15480	Chr1:5318011-5320594[+]	protein_coding_gene	#N/A	Tetratricopeptide repeat (TPR)-like superfamily protein	10.0659	8.31555	7.15785	8.48415	6.28058	-0.275592	-0.491877	-0.246634	-0.680506	_	_	_	_
AT1G15490	Chr1:5320615-5323895[-]	protein_coding_gene	#N/A	alpha/beta-Hydrolases superfamily protein	4.86287	4.31629	3.74607	5.14745	4.9722	-0.172016	-0.376429	0.0820497	0.0320762	_	_	_	_
AT1G15500	Chr1:5326290-5328874[+]	protein_coding_gene	ATNTT2	TLC ATP/ADP transporter	141.756	134.902	122.441	123.529	126.492	-0.0714981	-0.211323	-0.19856	-0.164364	_	_	_	_
AT1G15510	Chr1:5329111-5331711[+]	protein_coding_gene	ATECB2, ECB2, VAC1	Tetratricopeptide repeat (TPR)-like superfamily protein	8.56163	8.39653	7.29548	8.89779	5.95776	-0.0280922	-0.230882	0.0555615	-0.523115	_	_	_	_
AT1G15520	Chr1:5331858-5338326[-]	protein_coding_gene	PDR12, ATPDR12, ABCG40, ATABCG40	pleiotropic drug resistance 12	1.4685	1.11974	4.05962	2.04645	2.72472	-0.391176	1.467	0.478777	0.89176	_	U	_	_
AT1G15530	Chr1:5339961-5341931[-]	protein_coding_gene	#N/A	Concanavalin A-like lectin protein kinase family protein	14.7594	6.46423	8.08331	11.9136	10.2053	-1.19108	-0.868615	-0.309024	-0.532315	D	_	_	_
AT1G15550	Chr1:5344478-5346166[-]	protein_coding_gene	GA4, ATGA3OX1, GA3OX1	gibberellin 3-oxidase 1	5.88319	3.1086	5.66808	2.34385	4.17144	-0.920331	-0.0537384	-1.32771	-0.496052	_	_	D	_
AT1G15570	Chr1:5362009-5365549[+]	protein_coding_gene	CYCA2;3	CYCLIN A2;3	8.59532	6.25067	6.07432	8.02129	6.41033	-0.45954	-0.500828	-0.099717	-0.423152	_	_	_	_
AT1G15580	Chr1:5365665-5366497[-]	protein_coding_gene	IAA5, ATAUX2-27, AUX2-27	indole-3-acetic acid inducible 5	1.3993	3.69333	2.00816	9.02192	6.3297	1.40021	0.521166	2.68872	2.17742	U	_	U	U
AT1G15610	Chr1:5370677-5371859[+]	protein_coding_gene	#N/A	unknown protein; FUNCTIONS IN: molecular_function unknown; INVOLVED IN: biological_process unknown; LOCATED IN: cellular_component unknown; BEST Arabidopsis thaliana protein match is: unknown protein (TAIR:AT1G15630.1).	0.462287	0.691452	0.211895	0.947913	1.05323	0.58083	-1.1254	1.03595	1.18794	_	D	U	U
AT1G15620	Chr1:5373504-5374575[+]	protein_coding_gene	#N/A	unknown protein; BEST Arabidopsis thaliana protein match is: unknown protein (TAIR:AT1G15640.1); Has 125 Blast hits to 124 proteins in 14 species: Archae - 0; Bacteria - 0; Metazoa - 0; Fungi - 0; Plants - 125; Viruses - 0; Other Eukaryotes - 0 (source: NCBI BLink).	0.11345	0.357015	0.0904003	0.440461	0.427567	1.65384	-0.327625	1.95686	1.914	U	_	U	U
AT1G15630	Chr1:5376793-5378027[+]	protein_coding_gene	#N/A	unknown protein; BEST Arabidopsis thaliana protein match is: unknown protein (TAIR:AT1G15610.1); Has 122 Blast hits to 122 proteins in 14 species: Archae - 0; Bacteria - 0; Metazoa - 0; Fungi - 0; Plants - 122; Viruses - 0; Other Eukaryotes - 0 (source: NCBI BLink).	0.738896	0.970854	0.174041	1.24535	1.51787	0.393878	-2.08588	0.7531	1.03859	_	D	_	U
AT1G15640	Chr1:5378886-5380139[+]	protein_coding_gene	#N/A	unknown protein; BEST Arabidopsis thaliana protein match is: unknown protein (TAIR:AT1G15620.1); Has 154 Blast hits to 146 proteins in 13 species: Archae - 0; Bacteria - 0; Metazoa - 0; Fungi - 0; Plants - 154; Viruses - 0; Other Eukaryotes - 0 (source: NCBI BLink).	1.17938	0.724025	0.274554	2.46979	2.08862	-0.70391	-2.10283	1.06635	0.824516	_	D	U	_
AT1G15660	Chr1:5381170-5385254[+]	protein_coding_gene	CENP-C	centromere protein C	7.33707	7.51668	8.73933	8.26646	7.80615	0.0348915	0.252318	0.172065	0.089407	_	_	_	_
AT1G15670	Chr1:5389952-5391490[+]	protein_coding_gene	#N/A	Galactose oxidase/kelch repeat superfamily protein	47.5688	8.97851	14.5526	10.6539	16.2175	-2.40547	-1.70874	-2.15863	-1.55246	D	D	D	D
AT1G15690	Chr1:5398990-5402733[+]	protein_coding_gene	AVP1, ATAVP3, AVP-3, AtVHP1;1	Inorganic H pyrophosphatase family protein	299.045	308.47	455.663	229.43	221.396	0.0447676	0.607605	-0.382309	-0.433733	_	_	_	_
AT1G15700	Chr1:5402569-5403818[-]	protein_coding_gene	ATPC2	ATPase, F1 complex, gamma subunit protein	7.98749	7.18771	6.66193	6.58565	5.53878	-0.15221	-0.261802	-0.278416	-0.528173	_	_	_	_
AT1G15710	Chr1:5404358-5405686[+]	protein_coding_gene	#N/A	prephenate dehydrogenase family protein	22.6624	23.9657	27.2328	19.0364	18.5855	0.0806704	0.265045	-0.25154	-0.286123	_	_	_	_
AT1G15720	Chr1:5406025-5407486[+]	protein_coding_gene	TRFL5	TRF-like 5	2.41615	2.37995	1.90205	2.38069	2.80812	-0.0217787	-0.345153	-0.0213302	0.216894	_	_	_	_
AT1G15730	Chr1:5407401-5409987[-]	protein_coding_gene	#N/A	Cobalamin biosynthesis CobW-like protein	39.4201	35.8233	29.2184	39.1331	32.9235	-0.138033	-0.432054	-0.010542	-0.259814	_	_	_	_
AT1G15740	Chr1:5410908-5414919[+]	protein_coding_gene	#N/A	Leucine-rich repeat family protein	30.0582	24.112	30.5642	21.3568	23.8389	-0.318007	0.0240842	-0.493063	-0.334441	_	_	_	_
AT1G15750	Chr1:5414817-5421033[-]	protein_coding_gene	WSIP1, TPL	Transducin family protein / WD-40 repeat family protein	53.5175	55.9843	48.6494	53.9024	34.9035	0.0650116	-0.137589	0.0103388	-0.616639	_	_	_	_
AT1G15760	Chr1:5425714-5426322[+]	protein_coding_gene	#N/A	Sterile alpha motif (SAM) domain-containing protein	2.14025	2.39198	1.328	3.53803	4.95217	0.160425	-0.68852	0.725164	1.21028	_	_	_	U
AT1G15772	Chr1:5428520-5429561[-]	protein_coding_gene	#N/A	unknown protein; FUNCTIONS IN: molecular_function unknown; INVOLVED IN: biological_process unknown; LOCATED IN: cellular_component unknown; BEST Arabidopsis thaliana protein match is: unknown protein (TAIR:AT1G15780.1); Has 30201 Blast hits to 17322 proteins in 780 species: Archae - 12; Bacteria - 1396; Metazoa - 17338; Fungi - 3422; Plants - 5037; Viruses - 0; Other Eukaryotes - 2996 (source: NC…	0.0651301	0.0506059	0.0665605	0.0452518	0.0705071	-0.363955	0.0313371	-0.525252	0.114427	_	_	_	_
AT1G15780	Chr1:5430183-5436412[-]	protein_coding_gene	#N/A	unknown protein; BEST Arabidopsis thaliana protein match is: unknown protein (TAIR:AT2G10440.1); Has 103701 Blast hits to 43153 proteins in 1828 species: Archae - 30; Bacteria - 7385; Metazoa - 38639; Fungi - 11531; Plants - 7727; Viruses - 307; Other Eukaryotes - 38082 (source: NCBI BLink).	11.8183	16.154	20.0058	18.6958	12.8956	0.450869	0.759395	0.661691	0.125856	_	_	_	_
AT1G15790	Chr1:5438253-5440087[-]	protein_coding_gene	#N/A	unknown protein; BEST Arabidopsis thaliana protein match is: unknown protein (TAIR:AT1G15780.1); Has 35333 Blast hits to 34131 proteins in 2444 species: Archae - 798; Bacteria - 22429; Metazoa - 974; Fungi - 991; Plants - 531; Viruses - 0; Other Eukaryotes - 9610 (source: NCBI BLink).	8.87504	10.3614	10.8987	10.3032	8.94116	0.223393	0.29633	0.215267	0.0107084	_	_	_	_
AT1G15800	Chr1:5441082-5443684[-]	protein_coding_gene	#N/A	unknown protein; BEST Arabidopsis thaliana protein match is: unknown protein (TAIR:AT1G80610.1); Has 56 Blast hits to 52 proteins in 9 species: Archae - 0; Bacteria - 0; Metazoa - 0; Fungi - 0; Plants - 56; Viruses - 0; Other Eukaryotes - 0 (source: NCBI BLink).	8.0981	5.30059	7.43609	6.31471	11.739	-0.61143	-0.123039	-0.358866	0.535654	_	_	_	_
AT1G15810	Chr1:5444418-5446564[+]	protein_coding_gene	#N/A	S15/NS1, RNA-binding protein	25.6308	27.4676	30.3714	24.1055	22.1185	0.0998523	0.244835	-0.0885161	-0.212625	_	_	_	_
AT1G15820	Chr1:5446462-5447859[-]	protein_coding_gene	LHCB6, CP24	light harvesting complex photosystem II subunit 6	1675.7	1093.05	821.605	789.839	800.215	-0.616404	-1.02825	-1.08513	-1.0663	_	D	D	D
AT1G15825	Chr1:5448149-5448529[-]	protein_coding_gene	#N/A	hydroxyproline-rich glycoprotein family protein	1.65024	1.19981	1.60717	0.530758	0.703862	-0.459867	-0.0381531	-1.63653	-1.2293	_	_	D	D
AT1G15830	Chr1:5448726-5450177[+]	protein_coding_gene	#N/A	unknown protein; Has 165982 Blast hits to 57214 proteins in 2459 species: Archae - 263; Bacteria - 44622; Metazoa - 55751; Fungi - 10656; Plants - 17613; Viruses - 2527; Other Eukaryotes - 34550 (source: NCBI BLink).	4.58803	1.50266	0.770797	1.04559	0.949041	-1.61035	-2.57344	-2.13355	-2.27332	D	D	D	D
AT1G15860	Chr1:5454785-5457022[+]	protein_coding_gene	#N/A	Domain of unknown function (DUF298)	53.4317	41.5382	46.3338	38.4214	49.8338	-0.363257	-0.205631	-0.475786	-0.100571	_	_	_	_
AT1G15870	Chr1:5457084-5458429[+]	protein_coding_gene	#N/A	Mitochondrial glycoprotein family protein	7.17867	5.91022	4.35811	4.50088	3.78414	-0.280504	-0.720013	-0.673508	-0.923749	_	_	_	_
AT1G15880	Chr1:5458535-5460333[-]	protein_coding_gene	GOS11, atgos11	golgi snare 11	38.9088	26.039	28.4035	28.3672	30.8404	-0.579422	-0.454028	-0.455873	-0.335275	_	_	_	_
AT1G15885	Chr1:5460477-5461281[+]	protein_coding_gene	#N/A	unknown protein; Has 5 Blast hits to 5 proteins in 1 species: Archae - 0; Bacteria - 0; Metazoa - 0; Fungi - 0; Plants - 5; Viruses - 0; Other Eukaryotes - 0 (source: NCBI BLink).	12.0375	7.03331	7.40692	6.88524	6.96957	-0.775259	-0.700589	-0.805956	-0.788393	_	_	_	_
AT1G15890	Chr1:5461317-5464223[+]	protein_coding_gene	#N/A	Disease resistance protein (CC-NBS-LRR class) family	1.44078	0.715622	0.570169	1.81459	1.59895	-1.00957	-1.33737	0.332791	0.150274	D	D	_	_
AT1G15900	Chr1:5464356-5464697[+]	protein_coding_gene	#N/A	unknown protein; Has 19 Blast hits to 19 proteins in 10 species: Archae - 0; Bacteria - 2; Metazoa - 0; Fungi - 0; Plants - 15; Viruses - 0; Other Eukaryotes - 2 (source: NCBI BLink).	3.00152	2.96887	2.54438	5.82345	3.33605	-0.0157793	-0.238378	0.956178	0.152447	_	_	_	_
AT1G15910	Chr1:5465336-5469125[+]	protein_coding_gene	#N/A	XH/XS domain-containing protein	9.34671	8.15619	7.41594	12.1438	9.11936	-0.196563	-0.333829	0.377689	-0.035526	_	_	_	_
AT1G15920	Chr1:5469389-5471149[+]	protein_coding_gene	#N/A	Polynucleotidyl transferase, ribonuclease H-like superfamily protein	14.6338	11.9227	11.8734	12.4095	13.2303	-0.295593	-0.301571	-0.237859	-0.145459	_	_	_	_
AT1G15930	Chr1:5471400-5473014[+]	protein_coding_gene	#N/A	Ribosomal protein L7Ae/L30e/S12e/Gadd45 family protein	437.639	448.454	346.225	374.477	393.355	0.0352187	-0.338031	-0.224864	-0.153909	_	_	_	_
AT1G15940	Chr1:5473565-5478259[+]	protein_coding_gene	#N/A	Tudor/PWWP/MBT superfamily protein	6.79386	7.97087	8.64293	10.7158	10.4158	0.230505	0.347289	0.657435	0.61647	_	_	_	_
AT1G15950	Chr1:5478754-5482180[+]	protein_coding_gene	CCR1, IRX4, ATCCR1	cinnamoyl coa reductase 1	115.316	109.179	108.645	109.944	140.119	-0.0788973	-0.0859709	-0.0688238	0.28106	_	_	_	_
AT1G15960	Chr1:5481665-5485082[-]	protein_coding_gene	NRAMP6, ATNRAMP6	NRAMP metal ion transporter 6	6.48098	6.10048	10.2708	7.9113	5.53224	-0.0872891	0.664264	0.287702	-0.228348	_	_	_	_
AT1G15970	Chr1:5486319-5488868[-]	protein_coding_gene	#N/A	DNA glycosylase superfamily protein	10.342	12.8268	15.3175	9.93346	13.4917	0.310646	0.566665	-0.0581469	0.383557	_	_	_	_
AT1G15980	Chr1:5489298-5491363[+]	protein_coding_gene	NDF1, NDH48	NDH-dependent cyclic electron flow 1	108.135	62.2321	45.4439	66.9843	50.675	-0.797103	-1.25067	-0.690939	-1.09349	_	D	_	D
AT1G16000	Chr1:5494533-5495359[+]	protein_coding_gene	#N/A	unknown protein; BEST Arabidopsis thaliana protein match is: unknown protein (TAIR:AT1G80890.1); Has 41 Blast hits to 40 proteins in 10 species: Archae - 0; Bacteria - 0; Metazoa - 0; Fungi - 0; Plants - 41; Viruses - 0; Other Eukaryotes - 0 (source: NCBI BLink).	95.668	84.3588	73.9819	60.5181	74.9205	-0.181498	-0.370864	-0.66067	-0.352676	_	_	_	_
AT1G16010	Chr1:5495373-5497723[-]	protein_coding_gene	MGT2	magnesium transporter 2	26.7477	29.1156	33.9101	35.1368	30.1347	0.122377	0.3423	0.393568	0.172011	_	_	_	_
AT1G16020	Chr1:5498165-5501358[+]	protein_coding_gene	#N/A	Protein of unknown function (DUF1712)	9.60586	10.3813	11.5415	10.5073	8.62133	0.112	0.264844	0.129405	-0.156004	_	_	_	_
AT1G16022	Chr1:5501396-5501959[-]	protein_coding_gene	#N/A	unknown protein; FUNCTIONS IN: molecular_function unknown; INVOLVED IN: biological_process unknown; LOCATED IN: endomembrane system; Has 30201 Blast hits to 17322 proteins in 780 species: Archae - 12; Bacteria - 1396; Metazoa - 17338; Fungi - 3422; Plants - 5037; Viruses - 0; Other Eukaryotes - 2996 (source: NCBI BLink).	1.55232	1.22511	1.16632	1.10329	1.77103	-0.341512	-0.412459	-0.49261	0.190162	_	_	_	_
AT1G16030	Chr1:5502206-5504535[-]	protein_coding_gene	Hsp70b	heat shock protein 70B	3.31645	2.96235	3.72995	3.04617	3.37371	-0.162897	0.169516	-0.122643	0.0246961	_	_	_	_
AT1G16040	Chr1:5504735-5506611[+]	protein_coding_gene	#N/A	FUNCTIONS IN: molecular_function unknown; INVOLVED IN: GPI anchor biosynthetic process; LOCATED IN: integral to membrane, endoplasmic reticulum membrane; EXPRESSED IN: 24 plant structures; EXPRESSED DURING: 13 growth stages; CONTAINS InterPro DOMAIN/s: GPI biosynthesis protein Pig-F (InterPro:IPR009580); Has 280 Blast hits to 280 proteins in 133 species: Archae - 0; Bacteria - 0; Metazoa - 113; F…	21.6862	19.7585	18.7028	18.2372	20.0382	-0.134304	-0.213523	-0.249893	-0.114024	_	_	_	_
AT1G16060	Chr1:5508507-5511735[+]	protein_coding_gene	ADAP	ARIA-interacting double AP2 domain protein	4.26266	4.96861	7.62118	3.65561	3.88403	0.221088	0.838259	-0.221641	-0.134199	_	_	_	_
AT1G16070	Chr1:5511873-5513896[-]	protein_coding_gene	AtTLP8, TLP8	tubby like protein 8	1.5273	1.50474	1.11829	1.31707	1.28953	-0.0214691	-0.449686	-0.21365	-0.244136	_	_	_	_
AT1G16080	Chr1:5514317-5516027[+]	protein_coding_gene	#N/A	unknown protein; LOCATED IN: apoplast, chloroplast stroma, chloroplast, chloroplast envelope; EXPRESSED IN: 23 plant structures; EXPRESSED DURING: 14 growth stages; Has 81 Blast hits to 81 proteins in 28 species: Archae - 0; Bacteria - 2; Metazoa - 0; Fungi - 0; Plants - 62; Viruses - 0; Other Eukaryotes - 17 (source: NCBI BLink).	67.4114	53.8516	42.6927	47.6946	44.8722	-0.324003	-0.659003	-0.499167	-0.587171	_	_	_	_
AT1G16090	Chr1:5516259-5517822[+]	protein_coding_gene	WAKL7	wall associated kinase-like 7	0.68711	1.47654	1.29082	3.03374	3.88644	1.1036	0.909665	2.14247	2.49982	U	_	U	U
AT1G16110	Chr1:5518373-5520891[+]	protein_coding_gene	WAKL6	wall associated kinase-like 6	3.66873	3.25313	3.09273	6.93374	4.02427	-0.173452	-0.246399	0.918351	0.133446	_	_	_	_
AT1G16120	Chr1:5522639-5524983[+]	protein_coding_gene	WAKL1	wall associated kinase-like 1	0.31077	1.03048	2.01963	0.530468	0.402079	1.72936	2.70013	0.771399	0.371621	U	U	_	_
AT1G16130	Chr1:5525491-5528212[+]	protein_coding_gene	WAKL2	wall associated kinase-like 2	2.42329	2.8326	4.14318	6.06482	3.28053	0.225159	0.773769	1.32349	0.43696	_	_	U	_
AT1G16140	Chr1:5528965-5531255[+]	pseudogene	WAKL3	pseudogene similar to wall-associated kinase protein family	0.15617	0.341119	0.555421	0.254918	0.220614	1.12711	1.8304	0.70688	0.49838	U	U	_	_
AT1G16150	Chr1:5532415-5534877[+]	protein_coding_gene	WAKL4	wall associated kinase-like 4	0.267009	0.702242	0.57619	0.445139	0.256957	1.39505	1.10963	0.737346	-0.0553593	U	U	_	_
AT1G16160	Chr1:5535973-5538269[+]	protein_coding_gene	WAKL5	wall associated kinase-like 5	0.168177	0.17253	0.0739992	0.276254	0.183205	0.0368647	-1.18429	0.715981	0.123471	_	D	_	_
AT1G16170	Chr1:5538732-5539821[-]	protein_coding_gene	#N/A	unknown protein; FUNCTIONS IN: molecular_function unknown; INVOLVED IN: biological_process unknown; LOCATED IN: cellular_component unknown; EXPRESSED IN: 24 plant structures; EXPRESSED DURING: 15 growth stages; BEST Arabidopsis thaliana protein match is: unknown protein (TAIR:AT1G79660.1); Has 55 Blast hits to 55 proteins in 13 species: Archae - 0; Bacteria - 0; Metazoa - 0; Fungi - 0; Plants - 5…	70.5934	36.5785	45.5064	28.8804	29.5866	-0.948537	-0.633464	-1.28944	-1.25459	_	_	D	D
AT1G16180	Chr1:5540427-5542902[+]	protein_coding_gene	#N/A	Serinc-domain containing serine and sphingolipid biosynthesis protein	152.555	140.283	161.826	131.484	153.208	-0.120989	0.0851139	-0.214442	0.00616217	_	_	_	_
AT1G16190	Chr1:5543152-5546103[+]	protein_coding_gene	RAD23A	Rad23 UV excision repair protein family	19.319	21.7139	20.8026	25.0102	25.2632	0.168598	0.106743	0.372496	0.387017	_	_	_	_
AT1G16210	Chr1:5546128-5547552[-]	protein_coding_gene	#N/A	unknown protein; CONTAINS InterPro DOMAIN/s: Protein of unknown function DUF1014 (InterPro:IPR010422); Has 16107 Blast hits to 8386 proteins in 1107 species: Archae - 26; Bacteria - 3370; Metazoa - 4013; Fungi - 1516; Plants - 526; Viruses - 120; Other Eukaryotes - 6536 (source: NCBI BLink).	59.5504	62.5565	64.7987	64.1192	66.8606	0.0710486	0.121854	0.106645	0.167045	_	_	_	_
AT1G16220	Chr1:5548653-5550553[+]	protein_coding_gene	#N/A	Protein phosphatase 2C family protein	2.28847	2.18951	1.67109	3.1718	2.78442	-0.0637751	-0.453592	0.470917	0.282992	_	_	_	_
AT1G16225	Chr1:5551041-5552097[-]	protein_coding_gene	#N/A	Target SNARE coiled-coil domain protein	0.240619	0.195204	0.13645	0.128921	0.171813	-0.301754	-0.818332	-0.900211	-0.485887	_	_	_	_
AT1G16230	Chr1:5553467-5554324[-]	protein_coding_gene	#N/A	Target SNARE coiled-coil domain protein	0.121943	0.0954929	0.0138603	0.112086	0.209042	-0.352709	-3.13625	-0.12159	0.777537	_	D	_	_
AT1G16240	Chr1:5555007-5556841[-]	protein_coding_gene	SYP51, ATSYP51	syntaxin of plants 51	61.069	52.2966	53.0217	66.5835	67.6931	-0.223723	-0.203857	0.124724	0.148569	_	_	_	_
AT1G16250	Chr1:5556989-5559520[+]	protein_coding_gene	#N/A	Galactose oxidase/kelch repeat superfamily protein	7.85105	5.0167	6.14136	5.92682	6.05976	-0.646146	-0.354327	-0.405627	-0.373624	_	_	_	_
AT1G16260	Chr1:5559579-5562113[-]	protein_coding_gene	#N/A	Wall-associated kinase family protein	8.54497	5.28498	5.27344	7.8281	6.33247	-0.693176	-0.69633	-0.126413	-0.432306	_	_	_	_
AT1G16270	Chr1:5563087-5568368[+]	protein_coding_gene	#N/A	Protein kinase superfamily protein with octicosapeptide/Phox/Bem1p domain	9.78817	12.0742	12.5424	13.9734	11.313	0.302816	0.357702	0.513572	0.20887	_	_	_	_
AT1G16280	Chr1:5568482-5570487[-]	protein_coding_gene	RH36, AtRH36, SWA3	RNA helicase 36	14.6421	15.3947	10.8373	13.7125	13.3218	0.0723112	-0.434117	-0.0946308	-0.136333	_	_	_	_
AT1G16290	Chr1:5570753-5573538[-]	protein_coding_gene	#N/A	FUNCTIONS IN: molecular_function unknown; INVOLVED IN: biological_process unknown; LOCATED IN: chloroplast, vacuole; EXPRESSED IN: 19 plant structures; EXPRESSED DURING: 11 growth stages; CONTAINS InterPro DOMAIN/s: Lytic transglycosylase-like, catalytic (InterPro:IPR008258); Has 171 Blast hits to 155 proteins in 40 species: Archae - 0; Bacteria - 54; Metazoa - 0; Fungi - 0; Plants - 55; Viruses …	0.0362834	0.0995827	0.193246	0.0290122	0.0533265	1.45633	2.41273	-0.32255	0.555416	U	U	_	_
AT1G16300	Chr1:5574310-5577622[+]	protein_coding_gene	GAPCP-2	glyceraldehyde-3-phosphate dehydrogenase of plastid 2	10.9207	16.048	15.0927	12.2535	14.6588	0.555328	0.466785	0.166128	0.424701	_	_	_	_
AT1G16310	Chr1:5578431-5580693[+]	protein_coding_gene	#N/A	Cation efflux family protein	2.76713	4.11968	6.98421	2.64132	4.07319	0.57414	1.3357	-0.0671311	0.557767	_	U	_	_
AT1G16320	Chr1:5580855-5582143[+]	protein_coding_gene	#N/A	Uncharacterized conserved protein (DUF2358)	59.659	47.3763	49.5677	57.8153	64.9872	-0.332574	-0.267339	-0.0452885	0.123416	_	_	_	_
AT1G16330	Chr1:5582387-5587391[-]	protein_coding_gene	CYCB3;1	cyclin b3;1	1.54895	2.05934	1.80263	2.26406	2.2535	0.410889	0.218811	0.547619	0.540874	_	_	_	_
AT1G16340	Chr1:5587790-5590651[-]	protein_coding_gene	ATKDSA2	Aldolase superfamily protein	14.8682	14.3021	15.0488	14.0071	13.3787	-0.056003	0.0174184	-0.0860716	-0.152292	_	_	_	_
AT1G16350	Chr1:5590951-5593007[+]	protein_coding_gene	#N/A	Aldolase-type TIM barrel family protein	75.5628	73.8523	74.448	62.1446	52.6361	-0.0330333	-0.0214431	-0.282047	-0.521623	_	_	_	_
AT1G16360	Chr1:5593301-5595179[-]	protein_coding_gene	#N/A	LEM3 (ligand-effect modulator 3) family protein / CDC50 family protein	0.733027	0.425515	0.48744	0.381023	0.208429	-0.784642	-0.588632	-0.94397	-1.81426	_	_	_	D
AT1G16370	Chr1:5596694-5598447[+]	protein_coding_gene	ATOCT6, OCT6	organic cation/carnitine transporter 6	8.45874	7.5265	7.50269	26.2239	12.3363	-0.168463	-0.173035	1.63237	0.544395	_	_	U	_
AT1G16390	Chr1:5602873-5604663[+]	protein_coding_gene	ATOCT3, 3-Oct	organic cation/carnitine transporter 3	19.9849	4.53111	3.47347	3.39218	1.19453	-2.14097	-2.52446	-2.55862	-4.06438	D	D	D	D
AT1G16400	Chr1:5605159-5607473[+]	protein_coding_gene	CYP79F2	cytochrome P450, family 79, subfamily F, polypeptide 2	21.7904	22.0313	11.14	17.5631	13.3881	0.0158619	-0.967943	-0.311145	-0.702741	_	_	_	_
AT1G16410	Chr1:5608807-5611426[+]	protein_coding_gene	CYP79F1, BUS1, SPS1	cytochrome p450 79f1	75.9841	53.1972	50.0825	47.6338	35.7073	-0.514347	-0.601391	-0.673712	-1.08948	_	_	_	D
AT1G16420	Chr1:5612150-5613867[-]	protein_coding_gene	ATMC8, MC8	metacaspase 8	0.756088	0.526137	0.461353	4.64812	2.2227	-0.523107	-0.712671	2.62001	1.55567	_	_	U	U
AT1G16430	Chr1:5614619-5615510[+]	protein_coding_gene	#N/A	Surfeit locus protein 5 subunit 22 of Mediator complex	8.4942	10.8427	9.69118	8.44167	11.5745	0.352174	0.190194	-0.00894963	0.446399	_	_	_	_
AT1G16440	Chr1:5615815-5617672[+]	protein_coding_gene	RSH3	root hair specific 3	0.810483	0.542845	0.678142	0.700791	0.650074	-0.578233	-0.257191	-0.209795	-0.318174	_	_	_	_
AT1G16445	Chr1:5617811-5619334[+]	protein_coding_gene	#N/A	S-adenosyl-L-methionine-dependent methyltransferases superfamily protein	7.71235	7.27121	4.90884	6.54238	6.81707	-0.0849749	-0.651787	-0.237355	-0.178018	_	_	_	_
AT1G16460	Chr1:5619582-5622663[-]	protein_coding_gene	RDH2	rhodanese homologue 2	41.8096	39.7457	41.8062	42.7155	39.2822	-0.0730354	-0.000117326	0.0309254	-0.0899585	_	_	_	_
AT1G16470	Chr1:5622786-5625643[+]	protein_coding_gene	PAB1	proteasome subunit PAB1	105.47	88.8945	98.1357	80.9221	110.662	-0.246667	-0.103983	-0.382227	0.0693272	_	_	_	_
AT1G16480	Chr1:5625699-5628656[-]	protein_coding_gene	#N/A	Tetratricopeptide repeat (TPR)-like superfamily protein	1.02618	1.48779	1.61153	1.88701	1.52224	0.535883	0.651142	0.878812	0.568907	_	_	_	_
AT1G16489	Chr1:5629216-5630488[+]	other_RNA	#N/A	other RNA	1.78142	3.02924	3.06581	2.57379	2.06102	0.765925	0.783237	0.530864	0.21033	_	_	_	_
AT1G16490	Chr1:5629655-5630995[-]	protein_coding_gene	ATMYB58, MYB58	myb domain protein 58	0.587688	0.801935	0.538142	0.473677	0.572996	0.448428	-0.127061	-0.311141	-0.0365247	_	_	_	_
AT1G16500	Chr1:5639032-5640173[+]	protein_coding_gene	#N/A	unknown protein; BEST Arabidopsis thaliana protein match is: unknown protein (TAIR:AT1G79160.1); Has 136 Blast hits to 134 proteins in 17 species: Archae - 0; Bacteria - 0; Metazoa - 0; Fungi - 4; Plants - 131; Viruses - 1; Other Eukaryotes - 0 (source: NCBI BLink).	3.66103	8.1112	4.81818	18.1483	15.5755	1.14766	0.396238	2.30951	2.08895	U	_	U	U
AT1G16510	Chr1:5644572-5645443[-]	protein_coding_gene	#N/A	SAUR-like auxin-responsive protein family	6.94783	8.62681	14.37	7.25028	14.8346	0.312264	1.04842	0.0614742	1.09433	_	U	_	U
AT1G16515	Chr1:5647549-5647813[-]	protein_coding_gene	#N/A	unknown protein; Has 35333 Blast hits to 34131 proteins in 2444 species: Archae - 798; Bacteria - 22429; Metazoa - 974; Fungi - 991; Plants - 531; Viruses - 0; Other Eukaryotes - 9610 (source: NCBI BLink).	4.4329	22.2013	40.8378	13.0429	31.8721	2.32432	3.20358	1.55694	2.84597	U	U	U	U
AT1G16520	Chr1:5648760-5651167[+]	protein_coding_gene	#N/A	unknown protein; FUNCTIONS IN: molecular_function unknown; INVOLVED IN: biological_process unknown; LOCATED IN: plasma membrane; EXPRESSED IN: 22 plant structures; EXPRESSED DURING: 13 growth stages; BEST Arabidopsis thaliana protein match is: unknown protein (TAIR:AT1G56080.1); Has 243 Blast hits to 234 proteins in 69 species: Archae - 2; Bacteria - 2; Metazoa - 61; Fungi - 9; Plants - 125; Viru…	15.5902	19.7267	18.342	15.7264	22.0647	0.33951	0.234511	0.012549	0.5011	_	_	_	_
AT1G16530	Chr1:5651370-5652883[-]	protein_coding_gene	LBD3, ASL9	ASYMMETRIC LEAVES 2-like 9	1.35399	2.02325	0.888646	6.73668	5.76776	0.579454	-0.607531	2.31481	2.09079	_	_	U	U
AT1G16540	Chr1:5659415-5665449[+]	protein_coding_gene	SIR3, LOS5, ABA3, ATABA3, ACI2	molybdenum cofactor sulfurase (LOS5) (ABA3)	3.60358	5.01557	6.60908	6.10365	5.38549	0.476982	0.875017	0.76024	0.579645	_	_	_	_
AT1G16550	Chr1:5665907-5668209[+]	pseudogene	#N/A	pseudogene, putative cell division cycle protein, blastp match of 53% identity and 2.4e-136 P-value to GP	1.57333	1.62078	1.56264	1.9037	1.54773	0.0428667	-0.00983579	0.274983	-0.0236673	_	_	_	_
AT1G16560	Chr1:5668384-5670708[+]	protein_coding_gene	#N/A	Per1-like family protein	45.235	49.9481	65.2921	40.2863	45.9576	0.14299	0.529469	-0.16715	0.022864	_	_	_	_
AT1G16570	Chr1:5670577-5673600[-]	protein_coding_gene	#N/A	UDP-Glycosyltransferase superfamily protein	14.0788	13.813	12.9144	15.0255	14.4425	-0.0274977	-0.124544	0.0938886	0.0367961	_	_	_	_
AT1G16590	Chr1:5673795-5675131[+]	protein_coding_gene	REV7, ATREV7	DNA-binding HORMA family protein	4.99533	4.28975	3.34163	4.78866	4.23472	-0.219686	-0.580027	-0.0609579	-0.238313	_	_	_	_
AT1G16610	Chr1:5675704-5678852[-]	protein_coding_gene	SR45	arginine/serine-rich 45	49.2923	57.8424	51.7377	50.4172	44.5682	0.230765	0.0698536	0.0325537	-0.145348	_	_	_	_
AT1G16630	Chr1:5682118-5684867[-]	protein_coding_gene	#N/A	unknown protein; LOCATED IN: chloroplast; BEST Arabidopsis thaliana protein match is: unknown protein (TAIR:AT2G16270.1); Has 10587 Blast hits to 5736 proteins in 617 species: Archae - 88; Bacteria - 963; Metazoa - 3686; Fungi - 820; Plants - 541; Viruses - 438; Other Eukaryotes - 4051 (source: NCBI BLink).	2.82294	3.78983	3.57705	3.27202	2.55589	0.424933	0.341571	0.212982	-0.143372	_	_	_	_
AT1G16635	Chr1:5685503-5686368[-]	other_RNA	#N/A	#N/A	0.669977	1.2797	0.586218	0.801092	1.33645	0.933612	-0.192671	0.257853	0.996212	_	_	_	_
AT1G16640	Chr1:5686603-5687715[+]	protein_coding_gene	#N/A	AP2/B3-like transcriptional factor family protein	3.08914	1.42149	1.02923	2.37325	1.89966	-1.1198	-1.58563	-0.38034	-0.701461	D	D	_	_
AT1G16650	Chr1:5687943-5691198[+]	protein_coding_gene	#N/A	S-adenosyl-L-methionine-dependent methyltransferases superfamily protein	6.30875	4.73131	3.22441	6.66268	5.67175	-0.415114	-0.968317	0.0787483	-0.15356	_	_	_	_
AT1G16670	Chr1:5697324-5699769[+]	protein_coding_gene	#N/A	Protein kinase superfamily protein	9.30931	6.02777	6.56251	17.5009	13.9791	-0.627049	-0.504426	0.910682	0.586525	_	_	_	_
AT1G16680	Chr1:5702753-5705838[+]	protein_coding_gene	#N/A	Chaperone DnaJ-domain superfamily protein	9.54972	9.04945	8.46333	11.5276	10.9182	-0.0776282	-0.174233	0.271562	0.193205	_	_	_	_
AT1G16690	Chr1:5705969-5709533[+]	protein_coding_gene	#N/A	Enhancer of polycomb-like transcription factor protein	4.60016	4.31306	4.96142	4.9261	4.54904	-0.092972	0.109069	0.0987617	-0.0161219	_	_	_	_
AT1G16700	Chr1:5709725-5711902[+]	protein_coding_gene	#N/A	Alpha-helical ferredoxin	60.1652	61.8458	68.4483	49.6671	64.3503	0.0397464	0.186085	-0.276639	0.0970176	_	_	_	_
AT1G16705	Chr1:5712088-5713752[+]	protein_coding_gene	#N/A	p300/CBP acetyltransferase-related protein-related	0.275849	0.213535	0.307056	0.312233	0.458754	-0.369391	0.154618	0.178738	0.733821	_	_	_	_
AT1G16710	Chr1:5714219-5722614[+]	protein_coding_gene	HAC12	histone acetyltransferase of the CBP family 12	5.8163	8.15182	8.77771	9.79271	7.71743	0.48702	0.593742	0.751605	0.408018	_	_	_	_
AT1G16720	Chr1:5723088-5726478[+]	protein_coding_gene	HCF173	high chlorophyll fluorescence phenotype 173	57.4655	37.6234	42.1346	46.1638	38.7016	-0.611066	-0.447691	-0.315934	-0.570303	_	_	_	_
AT1G16730	Chr1:5726368-5727312[-]	protein_coding_gene	UP6	unknown protein 6	10.9205	6.03256	3.56168	5.79885	7.47385	-0.856196	-1.61641	-0.913199	-0.547115	_	D	_	_
AT1G16740	Chr1:5727690-5729080[+]	protein_coding_gene	#N/A	Ribosomal protein L20	81.5928	74.4066	73.9359	64.6194	78.9454	-0.133011	-0.142167	-0.336474	-0.0475866	_	_	_	_
AT1G16750	Chr1:5729097-5731870[-]	protein_coding_gene	#N/A	Protein of unknown function, DUF547	6.86014	7.98198	9.49922	7.02077	7.23425	0.218508	0.46957	0.0333912	0.0766053	_	_	_	_
AT1G16770	Chr1:5737878-5739377[+]	protein_coding_gene	#N/A	unknown protein; FUNCTIONS IN: molecular_function unknown; INVOLVED IN: biological_process unknown; LOCATED IN: cellular_component unknown; Has 103 Blast hits to 103 proteins in 50 species: Archae - 0; Bacteria - 4; Metazoa - 0; Fungi - 65; Plants - 32; Viruses - 0; Other Eukaryotes - 2 (source: NCBI BLink).	0.14724	0.103783	0.0755278	0.0648663	0.0754021	-0.504558	-0.962997	-1.1825	-0.9654	_	_	D	_
AT1G16780	Chr1:5739299-5744214[-]	protein_coding_gene	VHP2;2, AtVHP2;2	Inorganic H pyrophosphatase family protein	7.20806	8.75679	8.24245	8.74052	5.87001	0.280791	0.193462	0.278108	-0.296248	_	_	_	_
AT1G16790	Chr1:5744553-5745209[+]	protein_coding_gene	#N/A	ribosomal protein-related	26.5333	21.656	21.9605	14.8137	18.001	-0.293037	-0.272893	-0.840872	-0.559727	_	_	_	_
AT1G16800	Chr1:5745523-5755263[-]	protein_coding_gene	#N/A	P-loop containing nucleoside triphosphate hydrolases superfamily protein	1.50718	1.94424	1.83016	2.04036	1.66017	0.367352	0.280116	0.436969	0.139478	_	_	_	_
AT1G16810	Chr1:5755588-5756895[+]	protein_coding_gene	#N/A	unknown protein; CONTAINS InterPro DOMAIN/s: Protein of unknown function DUF1754, eukaryotic (InterPro:IPR013865); Has 35333 Blast hits to 34131 proteins in 2444 species: Archae - 798; Bacteria - 22429; Metazoa - 974; Fungi - 991; Plants - 531; Viruses - 0; Other Eukaryotes - 9610 (source: NCBI BLink).	93.1139	85.9303	104.829	85.1472	98.9807	-0.11583	0.170969	-0.129037	0.0881507	_	_	_	_
AT1G16820	Chr1:5756835-5758464[-]	protein_coding_gene	#N/A	vacuolar ATP synthase catalytic subunit-related / V-ATPase-related / vacuolar proton pump-related	2.77951	2.60849	2.83758	4.23547	3.05282	-0.0916153	0.0298304	0.60769	0.135311	_	_	_	_
AT1G16825	Chr1:5758855-5760501[+]	protein_coding_gene	#N/A	Reticulon family protein	10.3978	8.68468	7.40665	8.07882	8.9513	-0.259733	-0.489385	-0.364061	-0.216109	_	_	_	_
AT1G16830	Chr1:5760772-5762619[+]	protein_coding_gene	#N/A	Pentatricopeptide repeat (PPR) superfamily protein	2.59441	3.36209	2.22892	3.11329	2.12955	0.373951	-0.219061	0.263033	-0.284857	_	_	_	_
AT1G16840	Chr1:5762694-5764073[-]	protein_coding_gene	#N/A	unknown protein; BEST Arabidopsis thaliana protein match is: unknown protein (TAIR:AT1G78890.1); Has 71 Blast hits to 71 proteins in 12 species: Archae - 0; Bacteria - 0; Metazoa - 0; Fungi - 0; Plants - 71; Viruses - 0; Other Eukaryotes - 0 (source: NCBI BLink).	63.3102	53.6976	86.0998	58.2601	97.7779	-0.23758	0.443572	-0.11993	0.62707	_	_	_	_
AT1G16850	Chr1:5764807-5765651[-]	protein_coding_gene	#N/A	unknown protein; FUNCTIONS IN: molecular_function unknown; INVOLVED IN: response to salt stress; LOCATED IN: endomembrane system; EXPRESSED IN: leaf apex, leaf whorl, male gametophyte, flower, leaf; EXPRESSED DURING: LP.06 six leaves visible, LP.04 four leaves visible, LP.10 ten leaves visible, petal differentiation and expansion stage, LP.08 eight leaves visible; BEST Arabidopsis thaliana protei…	1.77999	18.6902	223.037	25.7788	117.641	3.39233	6.96926	3.85624	6.04637	U	U	U	U
AT1G16858	Chr1:5767300-5770602[+]	protein_coding_gene	CPuORF55	conserved peptide upstream open reading frame 55	23.714	34.9043	50.0969	34.3716	40.1476	0.557666	1.07898	0.535478	0.759574	_	U	_	_
AT1G16870	Chr1:5770732-5773251[-]	protein_coding_gene	#N/A	mitochondrial 28S ribosomal protein S29-related	33.6327	34.6136	27.9234	29.0419	28.1948	0.0414744	-0.26839	-0.211729	-0.254435	_	_	_	_
AT1G16880	Chr1:5773592-5776308[+]	protein_coding_gene	#N/A	uridylyltransferase-related	212.176	162.211	162.703	160.374	129.565	-0.38739	-0.383021	-0.403821	-0.711585	_	_	_	_
AT1G16890	Chr1:5776177-5778484[-]	protein_coding_gene	UBC36	ubiquitin-conjugating enzyme 36	156.881	155.722	167.704	141.339	175.901	-0.0106979	0.0962465	-0.150511	0.165093	_	_	_	_
AT1G16900	Chr1:5779021-5782433[-]	protein_coding_gene	#N/A	Alg9-like mannosyltransferase family	11.8836	15.0728	13.7956	12.4849	11.7309	0.342975	0.215236	0.0712123	-0.0186582	_	_	_	_
AT1G16905	Chr1:5782455-5783840[-]	protein_coding_gene	#N/A	Curculin-like (mannose-binding) lectin family protein	0.238931	0.107149	0.106592	0.137467	0.212883	-1.1569	-1.16442	-0.797464	-0.166526	D	D	_	_
AT1G16910	Chr1:5785003-5785927[+]	protein_coding_gene	LSH8	Protein of unknown function (DUF640)	0.395104	0.0833457	0.0446233	0.0325156	0.0142621	-2.24492	-3.14608	-3.60262	-4.791	D	D	D	D
AT1G16916	Chr1:5786560-5787112[-]	protein_coding_gene	#N/A	unknown protein; FUNCTIONS IN: molecular_function unknown; INVOLVED IN: biological_process unknown; LOCATED IN: cellular_component unknown; Has 30201 Blast hits to 17322 proteins in 780 species: Archae - 12; Bacteria - 1396; Metazoa - 17338; Fungi - 3422; Plants - 5037; Viruses - 0; Other Eukaryotes - 2996 (source: NCBI BLink).	18.7617	16.901	12.3644	12.2939	16.1349	-0.150682	-0.601598	-0.609847	-0.217606	_	_	_	_
AT1G16920	Chr1:5787330-5789249[-]	protein_coding_gene	RAB11, ATRABA1B, RABA1b	RAB GTPase homolog A1B	48.1331	45.2471	35.0011	41.3191	56.4933	-0.089204	-0.459629	-0.22022	0.23105	_	_	_	_
AT1G16930	Chr1:5789987-5791534[+]	protein_coding_gene	#N/A	F-box/RNI-like/FBD-like domains-containing protein	5.0949	5.04554	4.05493	6.75824	5.46781	-0.0140451	-0.329376	0.407593	0.101909	_	_	_	_
AT1G16960	Chr1:5799888-5800845[+]	protein_coding_gene	#N/A	Ubiquitin domain-containing protein	7.82996	7.37089	7.05911	7.84019	7.92014	-0.087166	-0.149518	0.00188368	0.016521	_	_	_	_
AT1G16970	Chr1:5800767-5805799[-]	protein_coding_gene	KU70, ATKU70	KU70 homolog	7.98928	8.55394	8.09746	9.75636	9.75667	0.0985235	0.0194039	0.288277	0.288323	_	_	_	_
AT1G17020	Chr1:5820206-5822013[+]	protein_coding_gene	SRG1, ATSRG1	senescence-related gene 1	6.38672	7.83328	31.2243	6.71045	7.44289	0.294541	2.28952	0.0713342	0.220787	_	U	_	_
AT1G17030	Chr1:5822368-5824455[+]	protein_coding_gene	#N/A	unknown protein; FUNCTIONS IN: molecular_function unknown; INVOLVED IN: biological_process unknown; LOCATED IN: endomembrane system; BEST Arabidopsis thaliana protein match is: unknown protein (TAIR:AT2G47010.2); Has 70 Blast hits to 70 proteins in 13 species: Archae - 0; Bacteria - 0; Metazoa - 0; Fungi - 0; Plants - 69; Viruses - 0; Other Eukaryotes - 1 (source: NCBI BLink).	0.722697	0.51643	0.526262	0.429729	0.176149	-0.48481	-0.457602	-0.74995	-2.03653	_	_	_	D
AT1G17040	Chr1:5824848-5828233[+]	protein_coding_gene	SHA	SH2 domain protein A	3.19319	2.63039	2.63557	3.60658	3.46288	-0.279721	-0.276882	0.175633	0.116974	_	_	_	_
AT1G17050	Chr1:5829080-5831343[+]	protein_coding_gene	SPS2	solanesyl diphosphate synthase 2	22.1422	30.0056	23.8291	30.7912	41.2443	0.438433	0.105926	0.475719	0.897396	_	_	_	_
AT1G17060	Chr1:5832097-5835456[-]	protein_coding_gene	CYP72C1, SOB7	cytochrome p450 72c1	6.19273	4.63262	5.41797	5.88384	5.4904	-0.418746	-0.192823	-0.0738174	-0.173664	_	_	_	_
AT1G17070	Chr1:5837590-5840332[+]	protein_coding_gene	#N/A	GC-rich sequence DNA-binding factor-like protein with Tuftelin interacting domain	5.50189	7.10693	7.98454	6.60184	4.55184	0.369299	0.537281	0.26294	-0.273477	_	_	_	_
AT1G17080	Chr1:5840269-5841606[-]	protein_coding_gene	#N/A	Ribosomal protein L18ae family	58.7673	60.7874	68.099	59.246	77.0775	0.0487587	0.21262	0.0117041	0.391296	_	_	_	_
AT1G17090	Chr1:5842216-5844283[-]	protein_coding_gene	#N/A	unknown protein; INVOLVED IN: biological_process unknown; LOCATED IN: endomembrane system; EXPRESSED IN: 17 plant structures; EXPRESSED DURING: 7 growth stages; Has 5 Blast hits to 5 proteins in 2 species: Archae - 0; Bacteria - 0; Metazoa - 0; Fungi - 0; Plants - 5; Viruses - 0; Other Eukaryotes - 0 (source: NCBI BLink).	3.53012	4.70672	4.38334	3.9275	12.0478	0.415004	0.312313	0.153894	1.77098	_	_	_	U
AT1G17100	Chr1:5844676-5845661[+]	protein_coding_gene	#N/A	SOUL heme-binding family protein	63.8197	61.8879	56.002	54.5121	66.0219	-0.0443445	-0.188523	-0.227425	0.0489428	_	_	_	_
AT1G17110	Chr1:5845660-5850934[-]	protein_coding_gene	UBP15	ubiquitin-specific protease 15	15.542	22.2313	23.8713	22.0866	20.4572	0.51642	0.619105	0.506999	0.396436	_	_	_	_
AT1G17120	Chr1:5851953-5853955[+]	protein_coding_gene	CAT8	cationic amino acid transporter 8	16.0155	19.7097	24.9831	12.7922	11.9011	0.299437	0.641483	-0.324204	-0.428374	_	_	_	_
AT1G17130	Chr1:5854148-5856697[+]	protein_coding_gene	#N/A	Family of unknown function (DUF572)	29.8609	30.924	34.0707	35.2716	35.0723	0.0504693	0.190274	0.240249	0.232074	_	_	_	_
AT1G17140	Chr1:5856573-5858550[-]	protein_coding_gene	ICR1, RIP1	interactor of constitutive active rops 1	31.4725	26.4955	26.8139	29.0748	24.4175	-0.248344	-0.231111	-0.114322	-0.366176	_	_	_	_
AT1G17145	Chr1:5860119-5862682[-]	protein_coding_gene	#N/A	RING/U-box superfamily protein	13.3034	8.70352	11.085	15.5216	12.1469	-0.612124	-0.263186	0.222482	-0.131207	_	_	_	_
AT1G17147	Chr1:5863431-5864009[-]	protein_coding_gene	#N/A	VQ motif-containing protein	9.72897	2.0235	2.84689	22.7262	17.192	-2.26543	-1.7729	1.224	0.821378	D	D	U	_
AT1G17150	Chr1:5865707-5867495[+]	protein_coding_gene	#N/A	Pectin lyase-like superfamily protein	0	0	0.00996459	0.0147468	0	0	9.96211	10.5272	0	_	_	_	_
AT1G17160	Chr1:5867635-5869356[+]	protein_coding_gene	#N/A	pfkB-like carbohydrate kinase family protein	18.4981	18.7467	22.4332	17.0008	17.4369	0.0192596	0.278258	-0.121774	-0.0852335	_	_	_	_
AT1G17170	Chr1:5869846-5870840[+]	protein_coding_gene	ATGSTU24, GST, GSTU24	glutathione S-transferase TAU 24	207.367	107.634	162.645	144.694	140.511	-0.946052	-0.35046	-0.519181	-0.561503	_	_	_	_
AT1G17180	Chr1:5872145-5873086[+]	protein_coding_gene	ATGSTU25, GSTU25	glutathione S-transferase TAU 25	6.22055	3.23737	7.79601	5.40214	8.30019	-0.942218	0.325693	-0.203511	0.416102	_	_	_	_
AT1G17190	Chr1:5875350-5876545[+]	protein_coding_gene	ATGSTU26, GSTU26	glutathione S-transferase tau 26	9.47933	7.75785	10.2118	19.2599	22.1063	-0.289128	0.10738	1.02274	1.2216	_	_	U	U
AT1G17200	Chr1:5878400-5880041[+]	protein_coding_gene	#N/A	Uncharacterised protein family (UPF0497)	84.0582	41.5031	44.4061	38.4996	46.3123	-1.01817	-0.920631	-1.12654	-0.859993	D	_	D	_
AT1G17210	Chr1:5880130-5884756[-]	protein_coding_gene	ATILP1, ILP1	IAP-like protein 1	22.7326	25.4402	22.8345	23.0879	25.1563	0.162347	0.0064525	0.0223742	0.146157	_	_	_	_
AT1G17220	Chr1:5885083-5890470[+]	protein_coding_gene	FUG1	Translation initiation factor 2, small GTP-binding protein	76.4027	71.0811	66.3047	80.4206	62.5489	-0.104158	-0.204512	0.0739415	-0.288639	_	_	_	_
AT1G17230	Chr1:5891324-5895075[+]	protein_coding_gene	#N/A	Leucine-rich receptor-like protein kinase family protein	5.0721	5.09424	5.13334	6.99368	9.89444	0.00628373	0.0173146	0.463468	0.964033	_	_	_	_
AT1G17232	Chr1:5892300-5893652[-]	other_RNA	#N/A	Potential natural antisense gene, locus overlaps with AT1G17230	0.736472	1.30908	1.1051	1.09623	0.544961	0.829842	0.585468	0.573842	-0.434471	_	_	_	_
AT1G17235	Chr1:5895351-5895710[+]	protein_coding_gene	RTFL11	ROTUNDIFOLIA like 11	0.154161	0.242604	0.105551	0.353428	0.719408	0.654131	-0.546454	1.19693	2.2223	_	_	_	U
AT1G17240	Chr1:5896416-5898717[-]	protein_coding_gene	AtRLP2, RLP2	receptor like protein 2	0.53293	0.491666	0.702027	0.597816	0.250049	-0.116265	0.397574	0.165753	-1.0917	_	_	_	D
AT1G17250	Chr1:5901169-5903439[-]	protein_coding_gene	AtRLP3, RLP3	receptor like protein 3	1.49216	1.63365	0.595413	2.51204	1.753	0.130696	-1.32543	0.751453	0.232422	_	D	_	_
AT1G17255	Chr1:5899994-5903619[+]	other_RNA	#N/A	other RNA	1.07673	1.47066	1.50238	1.47849	0.726963	0.449804	0.480589	0.457464	-0.566696	_	_	_	_
AT1G17260	Chr1:5904058-5908898[+]	protein_coding_gene	AHA10	autoinhibited H(+)-ATPase isoform 10	0.430907	0.647307	0.634009	0.655131	0.686799	0.587062	0.557116	0.604395	0.672499	_	_	_	_
AT1G17270	Chr1:5909249-5911693[-]	protein_coding_gene	#N/A	O-fucosyltransferase family protein	4.56732	4.743	4.28294	3.94957	3.23141	0.0544519	-0.0927462	-0.209652	-0.499183	_	_	_	_
AT1G17280	Chr1:5916871-5920089[-]	protein_coding_gene	UBC34	ubiquitin-conjugating enzyme 34	41.937	37.9986	46.9737	40.3566	43.0582	-0.142277	0.16363	-0.055419	0.0380643	_	_	_	_
AT1G17285	Chr1:5920774-5921415[+]	protein_coding_gene	#N/A	unknown protein; FUNCTIONS IN: molecular_function unknown; INVOLVED IN: biological_process unknown; LOCATED IN: endomembrane system; BEST Arabidopsis thaliana protein match is: unknown protein (TAIR:AT1G17300.1); Has 35333 Blast hits to 34131 proteins in 2444 species: Archae - 798; Bacteria - 22429; Metazoa - 974; Fungi - 991; Plants - 531; Viruses - 0; Other Eukaryotes - 9610 (source: NCBI BLink…	0.729313	0.45636	0.454304	0.56406	0.994618	-0.676354	-0.682868	-0.370684	0.447599	_	_	_	_
AT1G17290	Chr1:5922630-5926400[+]	protein_coding_gene	AlaAT1	alanine aminotransferas	130.34	158	153.716	191.441	194.788	0.277645	0.237987	0.55462	0.579625	_	_	_	_
AT1G17300	Chr1:5926994-5927784[+]	protein_coding_gene	#N/A	unknown protein; BEST Arabidopsis thaliana protein match is: unknown protein (TAIR:AT1G17285.1); Has 27 Blast hits to 27 proteins in 4 species: Archae - 0; Bacteria - 0; Metazoa - 0; Fungi - 0; Plants - 27; Viruses - 0; Other Eukaryotes - 0 (source: NCBI BLink).	0.347614	0.330494	0.0974037	0.467915	0.678848	-0.07286	-1.83533	0.42875	0.965582	_	D	_	_
AT1G17310	Chr1:5928014-5928667[-]	protein_coding_gene	#N/A	MADS-box transcription factor family protein	0.360748	0.751244	2.37502	0.0927849	0.144126	1.05827	2.71884	-1.95891	-1.3236	U	U	D	D
AT1G17330	Chr1:5929909-5931831[+]	protein_coding_gene	#N/A	Metal-dependent phosphohydrolase	14.8844	12.8232	14.6053	16.555	15.6177	-0.215045	-0.0273091	0.153466	0.0693809	_	_	_	_
AT1G17340	Chr1:5933870-5938761[+]	protein_coding_gene	#N/A	Phosphoinositide phosphatase family protein	10.3697	11.1919	14.2798	17.4223	12.1672	0.110081	0.461601	0.74856	0.230623	_	_	_	_
AT1G17345	Chr1:5940423-5941210[+]	protein_coding_gene	#N/A	SAUR-like auxin-responsive protein family	4.964	1.72944	2.32012	3.75402	2.58968	-1.52119	-1.0973	-0.403066	-0.938727	D	D	_	_
AT1G17350	Chr1:5941784-5944463[+]	protein_coding_gene	#N/A	NADH:ubiquinone oxidoreductase intermediate-associated protein 30	12.9805	12.153	11.3843	13.4958	13.8919	-0.0950334	-0.1893	0.0561645	0.0978979	_	_	_	_
AT1G17360	Chr1:5946764-5951473[+]	protein_coding_gene	#N/A	BEST Arabidopsis thaliana protein match is: COP1-interacting protein-related (TAIR:AT1G72410.1); Has 9949 Blast hits to 7480 proteins in 576 species: Archae - 12; Bacteria - 1007; Metazoa - 3636; Fungi - 982; Plants - 444; Viruses - 50; Other Eukaryotes - 3818 (source: NCBI BLink).	10.9357	12.7823	10.1685	17.5772	18.0434	0.225102	-0.104939	0.684659	0.722425	_	_	_	_
AT1G17370	Chr1:5951542-5955037[-]	protein_coding_gene	UBP1B	oligouridylate binding protein 1B	28.3038	33.1569	38.2212	29.7922	27.3855	0.228313	0.433377	0.0739389	-0.0475835	_	_	_	_
AT1G17380	Chr1:5955488-5957212[-]	protein_coding_gene	JAZ5, TIFY11A	jasmonate-zim-domain protein 5	3.31761	5.23437	4.71016	41.0099	34.7953	0.65787	0.50563	3.62775	3.39067	_	_	U	U
AT1G17400	Chr1:5960481-5962481[-]	protein_coding_gene	#N/A	unknown protein; BEST Arabidopsis thaliana protein match is: unknown protein (TAIR:AT1G72490.1); Has 30201 Blast hits to 17322 proteins in 780 species: Archae - 12; Bacteria - 1396; Metazoa - 17338; Fungi - 3422; Plants - 5037; Viruses - 0; Other Eukaryotes - 2996 (source: NCBI BLink).	0.739257	1.07826	0.911807	0.308718	0.259999	0.544551	0.302649	-1.25976	-1.50753	_	_	D	D
AT1G17410	Chr1:5968534-5969995[-]	protein_coding_gene	#N/A	Nucleoside diphosphate kinase family protein	7.13378	5.71406	5.1861	6.41812	8.48074	-0.32015	-0.460016	-0.152516	0.249523	_	_	_	_
AT1G17420	Chr1:5977411-5981480[+]	protein_coding_gene	LOX3	lipoxygenase 3	3.54608	5.8275	10.7873	52.534	36.5722	0.71665	1.60503	3.88895	3.36645	_	U	U	U
AT1G17430	Chr1:5982267-5984013[+]	protein_coding_gene	#N/A	alpha/beta-Hydrolases superfamily protein	8.26992	6.69175	4.829	7.51418	4.27647	-0.305489	-0.776148	-0.138258	-0.951451	_	_	_	_
AT1G17440	Chr1:5983984-5987784[-]	protein_coding_gene	EER4, TAF12B	Transcription initiation factor TFIID subunit A	15.4352	22.4569	26.769	25.9552	19.656	0.540934	0.794339	0.749799	0.348745	_	_	_	_
AT1G17450	Chr1:5988280-5996785[-]	protein_coding_gene	#N/A	B-block binding subunit of TFIIIC	3.93225	5.93272	6.33463	5.669	4.22659	0.593337	0.687904	0.527738	0.104139	_	_	_	_
AT1G17455	Chr1:5997180-5998475[+]	protein_coding_gene	ELF4-L4	ELF4-like 4	9.8508	8.84773	10.3868	8.39061	10.7023	-0.154933	0.0764384	-0.231465	0.119608	_	_	_	_
AT1G17460	Chr1:5998814-6002716[+]	protein_coding_gene	TRFL3	TRF-like 3	3.45194	4.21012	4.23354	3.39056	3.66235	0.286453	0.294456	-0.0258837	0.085362	_	_	_	_
AT1G17470	Chr1:6002912-6006405[+]	protein_coding_gene	ATDRG1, ATDRG, DRG1	developmentally regulated G-protein 1	80.8471	74.1941	65.902	68.5068	70.0571	-0.123892	-0.294874	-0.238949	-0.206665	_	_	_	_
AT1G17480	Chr1:6006461-6008266[-]	protein_coding_gene	IQD7	IQ-domain 7	2.15108	2.32806	1.91683	2.65877	2.38802	0.114067	-0.166338	0.305697	0.150753	_	_	_	_
AT1G17490	Chr1:6008589-6009420[+]	protein_coding_gene	#N/A	unknown protein; BEST Arabidopsis thaliana protein match is: unknown protein (TAIR:AT1G72690.1); Has 57 Blast hits to 45 proteins in 9 species: Archae - 0; Bacteria - 0; Metazoa - 0; Fungi - 0; Plants - 57; Viruses - 0; Other Eukaryotes - 0 (source: NCBI BLink).	23.4879	24.2381	28.5387	24.1591	26.537	0.0453589	0.281002	0.040649	0.176087	_	_	_	_
AT1G17500	Chr1:6018757-6023503[+]	protein_coding_gene	#N/A	ATPase E1-E2 type family protein / haloacid dehalogenase-like hydrolase family protein	9.27685	12.9376	15.5085	16.3759	12.9399	0.479863	0.741352	0.819867	0.480119	_	_	_	_
AT1G17510	Chr1:6023504-6024309[-]	protein_coding_gene	#N/A	unknown protein; Has 11 Blast hits to 11 proteins in 4 species: Archae - 0; Bacteria - 0; Metazoa - 0; Fungi - 0; Plants - 11; Viruses - 0; Other Eukaryotes - 0 (source: NCBI BLink).	11.9364	14.135	14.4114	9.8003	13.2455	0.243904	0.271842	-0.28447	0.150134	_	_	_	_
AT1G17520	Chr1:6024636-6027385[-]	protein_coding_gene	#N/A	Homeodomain-like/winged-helix DNA-binding family protein	11.6195	8.52652	7.60665	11.9123	11.2425	-0.446519	-0.611214	0.035904	-0.0475851	_	_	_	_
AT1G17530	Chr1:6027631-6028506[+]	protein_coding_gene	ATTIM23-1, TIM23-1	translocase of inner mitochondrial membrane 23	39.8664	33.5868	33.9308	24.5757	33.5711	-0.247279	-0.232578	-0.697941	-0.247953	_	_	_	_
AT1G17550	Chr1:6034362-6037289[+]	protein_coding_gene	HAB2	homology to ABI2	12.4899	32.4583	53.9914	20.3168	37.7834	1.37782	2.11197	0.701911	1.59699	U	U	_	U
AT1G17560	Chr1:6037464-6038692[-]	protein_coding_gene	HLL	Ribosomal protein L14p/L23e family protein	16.6606	18.2277	13.6885	13.1439	11.5401	0.129692	-0.283476	-0.342047	-0.529784	_	_	_	_
AT1G17580	Chr1:6039303-6049556[+]	protein_coding_gene	MYA1, ATMYA1, XI-1	myosin 1	10.2047	10.6	11.7314	13.9252	9.61093	0.0548304	0.201141	0.448464	-0.0864857	_	_	_	_
AT1G17590	Chr1:6050193-6052568[-]	protein_coding_gene	NF-YA8	nuclear factor Y, subunit A8	4.78045	5.02063	4.58408	5.58375	3.39456	0.0707218	-0.0605141	0.224087	-0.493921	_	_	_	_
AT1G17600	Chr1:6052936-6056664[-]	protein_coding_gene	#N/A	Disease resistance protein (TIR-NBS-LRR class) family	0.64483	0.606921	0.454021	0.777516	0.427409	-0.0874087	-0.50615	0.26995	-0.59329	_	_	_	_
AT1G17610	Chr1:6056895-6058357[+]	protein_coding_gene	#N/A	Disease resistance protein (TIR-NBS class)	0.821863	0.794686	0.542679	0.946215	0.611273	-0.0485124	-0.59879	0.203268	-0.427075	_	_	_	_
AT1G17620	Chr1:6062216-6063291[+]	protein_coding_gene	#N/A	Late embryogenesis abundant (LEA) hydroxyproline-rich glycoprotein family	67.1928	71.724	74.4541	90.9256	74.9303	0.0941493	0.148045	0.43638	0.157243	_	_	_	_
AT1G17630	Chr1:6064525-6066720[+]	protein_coding_gene	#N/A	Pentatricopeptide repeat (PPR-like) superfamily protein	1.69031	2.84969	3.0486	2.78093	2.13339	0.753514	0.850855	0.718276	0.335858	_	_	_	_
AT1G17640	Chr1:6067394-6069098[-]	protein_coding_gene	#N/A	RNA-binding (RRM/RBD/RNP motifs) family protein	7.09558	4.1263	5.0485	6.24985	4.63259	-0.78207	-0.491065	-0.183099	-0.615101	_	_	_	_
AT1G17650	Chr1:6069477-6072012[-]	protein_coding_gene	GLYR2, GR2	glyoxylate reductase 2	37.9157	33.5597	32.0288	31.2666	35.422	-0.176065	-0.243426	-0.278173	-0.0981497	_	_	_	_
AT1G17665	Chr1:6072253-6074484[-]	protein_coding_gene	#N/A	unknown protein; FUNCTIONS IN: molecular_function unknown; INVOLVED IN: biological_process unknown; LOCATED IN: endomembrane system; EXPRESSED IN: 15 plant structures; EXPRESSED DURING: 11 growth stages; Has 149 Blast hits to 146 proteins in 39 species: Archae - 0; Bacteria - 4; Metazoa - 21; Fungi - 5; Plants - 30; Viruses - 0; Other Eukaryotes - 89 (source: NCBI BLink).	1.79214	1.90349	3.39373	3.98275	6.07354	0.0869632	0.921185	1.15208	1.76085	_	_	U	U
AT1G17680	Chr1:6076077-6082337[+]	protein_coding_gene	#N/A	tetratricopeptide repeat (TPR)-containing protein	7.40732	7.75219	8.60569	8.95681	7.80883	0.0656522	0.216339	0.274033	0.0761546	_	_	_	_
AT1G17690	Chr1:6082755-6088340[-]	protein_coding_gene	NOF1	FUNCTIONS IN: molecular_function unknown; INVOLVED IN: biological_process unknown; LOCATED IN: nucleus; EXPRESSED IN: 24 plant structures; EXPRESSED DURING: 13 growth stages; CONTAINS InterPro DOMAIN/s: Digestive organ expansion factor, predicted (InterPro:IPR010678); Has 25006 Blast hits to 13379 proteins in 904 species: Archae - 102; Bacteria - 5571; Metazoa - 7448; Fungi - 3168; Plants - 1056;…	17.1328	17.1705	11.7641	18.7341	16.9743	0.0031711	-0.54237	0.128906	-0.0134089	_	_	_	_
AT1G17700	Chr1:6089517-6090323[+]	protein_coding_gene	PRA1.F1	prenylated RAB acceptor 1.F1	9.05765	12.9472	10.3684	9.32428	5.16469	0.515431	0.194984	0.0418555	-0.810454	_	_	_	_
AT1G17710	Chr1:6090560-6092027[-]	protein_coding_gene	#N/A	Pyridoxal phosphate phosphatase-related protein	2.13878	0.896502	0.827778	1.0156	0.722373	-1.2544	-1.36946	-1.07445	-1.56596	D	D	D	D
AT1G17720	Chr1:6093208-6098383[-]	protein_coding_gene	ATB BETA	Protein phosphatase 2A, regulatory subunit PR55	31.6588	37.1222	41.64	31.441	31.9585	0.229676	0.395363	-0.00995947	0.0135931	_	_	_	_
AT1G17730	Chr1:6099089-6100315[+]	protein_coding_gene	VPS46.1, CHMP1B	vacuolar protein sorting 46.1	35.7251	33.1749	36.1633	40.7451	50.8066	-0.106846	0.0175883	0.189688	0.508078	_	_	_	_
AT1G17744	Chr1:6100961-6101983[-]	protein_coding_gene	#N/A	unknown protein; FUNCTIONS IN: molecular_function unknown; INVOLVED IN: biological_process unknown; LOCATED IN: cellular_component unknown; EXPRESSED IN: stem; Has 30201 Blast hits to 17322 proteins in 780 species: Archae - 12; Bacteria - 1396; Metazoa - 17338; Fungi - 3422; Plants - 5037; Viruses - 0; Other Eukaryotes - 2996 (source: NCBI BLink).	0.297832	0.96193	3.80368	0.3747	0.818636	1.6914	3.67478	0.331227	1.45869	U	U	_	U
AT1G17745	Chr1:6100964-6105265[+]	protein_coding_gene	PGDH	D-3-phosphoglycerate dehydrogenase	24.5797	31.3345	132.941	25.2195	29.0237	0.350285	2.43525	0.0370724	0.239764	_	U	_	_
AT1G17750	Chr1:6106656-6110120[+]	protein_coding_gene	PEPR2, AtPEPR2	PEP1 receptor 2	0.949703	1.18686	1.35799	5.33237	5.43021	0.321598	0.51592	2.48922	2.51545	_	_	U	U
AT1G17760	Chr1:6110107-6116617[-]	protein_coding_gene	CSTF77, ATCSTF77	Tetratricopeptide repeat (TPR)-like superfamily protein	8.72588	9.7715	9.67056	11.4664	10.8653	0.163279	0.148299	0.39404	0.316355	_	_	_	_
AT1G17780	Chr1:6123701-6125269[+]	protein_coding_gene	#N/A	unknown protein; BEST Arabidopsis thaliana protein match is: unknown protein (TAIR:AT2G16575.1); Has 13 Blast hits to 13 proteins in 2 species: Archae - 0; Bacteria - 0; Metazoa - 0; Fungi - 0; Plants - 13; Viruses - 0; Other Eukaryotes - 0 (source: NCBI BLink).	14.2871	10.7218	10.5939	12.8382	10.3003	-0.414166	-0.431479	-0.15427	-0.472026	_	_	_	_
AT1G17790	Chr1:6125356-6127404[-]	protein_coding_gene	#N/A	DNA-binding bromodomain-containing protein	6.32169	5.53931	5.96761	5.55233	6.34341	-0.190604	-0.0831569	-0.187217	0.00494829	_	_	_	_
AT1G17810	Chr1:6130025-6131627[+]	protein_coding_gene	BETA-TIP	beta-tonoplast intrinsic protein	0.26881	0.0673908	0.865454	0.186791	0.129819	-1.9958	1.68683	-0.525138	-1.05003	D	U	_	D
AT1G17820	Chr1:6131537-6135345[-]	protein_coding_gene	#N/A	Putative integral membrane protein conserved region (DUF2404)	6.3437	6.62516	7.325	6.1463	6.21318	0.0626307	0.207504	-0.0456063	-0.0299926	_	_	_	_
AT1G17830	Chr1:6135803-6138432[-]	protein_coding_gene	#N/A	Protein of unknown function (DUF789)	3.92353	9.88201	10.0104	12.9865	23.6074	1.33265	1.35127	1.72679	2.58901	U	U	U	U
AT1G17840	Chr1:6142564-6146521[+]	protein_coding_gene	WBC11, ABCG11, DSO, COF1, ATWBC11	white-brown complex homolog protein 11	45.8192	83.0712	115.106	60.5152	106.516	0.858396	1.32894	0.401345	1.21705	_	U	_	U
AT1G17850	Chr1:6145926-6148940[-]	protein_coding_gene	#N/A	Rhodanese/Cell cycle control phosphatase superfamily protein	15.678	15.1995	12.0605	15.368	11.0245	-0.0447176	-0.378452	-0.0288121	-0.508028	_	_	_	_
AT1G17860	Chr1:6149301-6150038[+]	protein_coding_gene	#N/A	Kunitz family trypsin and protease inhibitor protein	130.837	100.242	95.7094	104.123	119.516	-0.384283	-0.451038	-0.329482	-0.130567	_	_	_	_
AT1G17870	Chr1:6149939-6152222[-]	protein_coding_gene	ATEGY3, EGY3	ethylene-dependent gravitropism-deficient and yellow-green-like 3	2.91332	4.43602	8.09113	5.51594	10.569	0.6066	1.47367	0.92094	1.8591	_	U	_	U
AT1G17880	Chr1:6152409-6153982[-]	protein_coding_gene	BTF3, ATBTF3	basic transcription factor 3	448.594	390.389	369.546	371.533	406.14	-0.200498	-0.279656	-0.27192	-0.143433	_	_	_	_
AT1G17890	Chr1:6154268-6155752[-]	protein_coding_gene	GER2	NAD(P)-binding Rossmann-fold superfamily protein	40.9379	52.424	56.8368	39.1404	47.0843	0.35679	0.473388	-0.0647786	0.201809	_	_	_	_
AT1G17920	Chr1:6161872-6165382[-]	protein_coding_gene	HDG12	homeodomain GLABROUS 12	1.7433	2.57578	2.83533	2.85489	3.30832	0.563186	0.701693	0.711611	0.924274	_	_	_	_
AT1G17930	Chr1:6166220-6168839[-]	protein_coding_gene	#N/A	Aminotransferase-like, plant mobile domain family protein	5.30565	5.68246	6.41889	5.71872	6.23581	0.0989859	0.274794	0.108163	0.233047	_	_	_	_
AT1G17940	Chr1:6169341-6173222[-]	protein_coding_gene	#N/A	Endosomal targeting BRO1-like domain-containing protein	7.11224	34.5208	117.044	13.7283	98.8031	2.27909	4.0406	0.948776	3.79618	U	U	_	U
AT1G17950	Chr1:6177617-6179289[+]	protein_coding_gene	ATMYB52, BW52, MYB52	myb domain protein 52	0.734521	0.695001	1.58326	0.613893	0.85183	-0.0797876	1.10801	-0.258813	0.213759	_	U	_	_
AT1G17960	Chr1:6180896-6183806[-]	protein_coding_gene	#N/A	Threonyl-tRNA synthetase	1.34437	2.45885	2.44037	2.64025	1.83331	0.871049	0.860165	0.973739	0.447518	_	_	_	_
AT1G17970	Chr1:6184904-6187472[+]	protein_coding_gene	#N/A	RING/U-box superfamily protein	15.2596	10.2697	14.297	10.9923	16.8943	-0.571323	-0.0940046	-0.473223	0.146819	_	_	_	_
AT1G17980	Chr1:6187507-6191708[-]	protein_coding_gene	PAPS1	poly(A) polymerase 1	13.1874	12.8731	13.603	21.6942	13.8663	-0.0348006	0.0447647	0.718149	0.0724227	_	_	_	_
AT1G17990	Chr1:6192071-6194093[-]	protein_coding_gene	#N/A	FMN-linked oxidoreductases superfamily protein	21.0417	8.49099	12.8427	15.8112	9.92379	-1.30925	-0.712302	-0.412304	-1.08429	D	_	_	D
AT1G18000	Chr1:6194543-6196229[-]	protein_coding_gene	#N/A	Major facilitator superfamily protein	11.4749	3.36728	5.96686	1.19899	1.75613	-1.76882	-0.943437	-3.25858	-2.708	D	_	D	D
AT1G18010	Chr1:6199898-6201484[+]	protein_coding_gene	#N/A	Major facilitator superfamily protein	12.1878	3.74898	6.26731	1.22756	1.79818	-1.70087	-0.959518	-3.31156	-2.76082	D	_	D	D
AT1G18020	Chr1:6202249-6203918[+]	protein_coding_gene	#N/A	FMN-linked oxidoreductases superfamily protein	26.1894	10.5	15.1819	19.45	12.0604	-1.31859	-0.78663	-0.429213	-1.1187	D	_	_	D
AT1G18030	Chr1:6204343-6206988[+]	protein_coding_gene	#N/A	Protein phosphatase 2C family protein	8.06071	6.04077	6.2263	7.77774	6.23472	-0.416174	-0.372531	-0.0515558	-0.370582	_	_	_	_
AT1G18040	Chr1:6206871-6209500[-]	protein_coding_gene	CDKD1;3, AT;CDCKD;3, CAK2AT	cyclin-dependent kinase D1;3	8.50252	9.50262	10.4056	9.34767	9.03078	0.160435	0.291397	0.136716	0.08696	_	_	_	_
AT1G18050	Chr1:6209771-6211588[-]	protein_coding_gene	#N/A	SWAP (Suppressor-of-White-APricot)/surp RNA-binding domain-containing protein	0	0	0	0.051316	0.0240491	0	0	12.3255	11.2324	_	_	U	_
AT1G18060	Chr1:6211873-6213444[-]	protein_coding_gene	#N/A	unknown protein; INVOLVED IN: biological_process unknown; LOCATED IN: chloroplast; EXPRESSED IN: 22 plant structures; EXPRESSED DURING: 13 growth stages; Has 74 Blast hits to 74 proteins in 29 species: Archae - 0; Bacteria - 19; Metazoa - 0; Fungi - 0; Plants - 49; Viruses - 0; Other Eukaryotes - 6 (source: NCBI BLink).	68.8241	44.0938	35.1164	42.6529	42.899	-0.642338	-0.970769	-0.69027	-0.68197	_	_	_	_
AT1G18070	Chr1:6213725-6218340[-]	protein_coding_gene	#N/A	Translation elongation factor EF1A/initiation factor IF2gamma family protein	70.9715	83.3343	87.6318	94.7754	89.2327	0.231671	0.304215	0.417273	0.330333	_	_	_	_
AT1G18080	Chr1:6222201-6224151[+]	protein_coding_gene	ATARCA, RACK1A_AT, RACK1A	Transducin/WD40 repeat-like superfamily protein	609.702	659.313	583.408	477.816	550.177	0.112859	-0.0635991	-0.351649	-0.148208	_	_	_	_
AT1G18090	Chr1:6224501-6227822[+]	protein_coding_gene	#N/A	5'-3' exonuclease family protein	5.9678	7.25981	6.55934	6.7897	6.62442	0.282732	0.136351	0.186148	0.150595	_	_	_	_
AT1G18100	Chr1:6227217-6230188[-]	protein_coding_gene	E12A11, MFT	PEBP (phosphatidylethanolamine-binding protein) family protein	2.83683	8.66638	24.9851	1.48304	3.69407	1.61115	3.13871	-0.935718	0.38093	U	U	_	_
AT1G18140	Chr1:6238844-6241436[-]	protein_coding_gene	LAC1, ATLAC1	laccase 1	1.05889	0.716487	0.493959	1.51087	1.41666	-0.563534	-1.10007	0.512823	0.419937	_	D	_	_
AT1G18150	Chr1:6244298-6247812[-]	protein_coding_gene	ATMPK8	Protein kinase superfamily protein	21.5944	25.9323	35.7467	28.2082	31.8981	0.264093	0.727153	0.385457	0.562813	_	_	_	_
AT1G18160	Chr1:6248793-6254039[+]	protein_coding_gene	#N/A	Protein kinase superfamily protein	12.4186	13.6925	12.2974	19.2266	15.2732	0.140883	-0.0141492	0.630601	0.2985	_	_	_	_
AT1G18170	Chr1:6254229-6255690[+]	protein_coding_gene	#N/A	FKBP-like peptidyl-prolyl cis-trans isomerase family protein	42.7902	33.8811	30.9776	27.2089	25.8006	-0.3368	-0.466055	-0.653202	-0.729876	_	_	_	_
AT1G18180	Chr1:6255830-6257900[+]	protein_coding_gene	#N/A	Protein of unknown function (DUF1295)	3.25387	3.07698	3.09805	3.02349	2.96434	-0.0806413	-0.070796	-0.105941	-0.134445	_	_	_	_
AT1G18190	Chr1:6257851-6261457[-]	protein_coding_gene	GC2	golgin candidate 2	9.05637	9.61039	10.5313	11.2994	8.3968	0.085662	0.217679	0.319241	-0.109093	_	_	_	_
AT1G18200	Chr1:6265416-6266937[-]	protein_coding_gene	AtRABA6b, RABA6b	RAB GTPase homolog A6B	2.72365	2.20889	1.1755	13.9181	8.82092	-0.302219	-1.21226	2.35334	1.69538	_	D	U	U
AT1G18210	Chr1:6266609-6268828[-]	protein_coding_gene	#N/A	Calcium-binding EF-hand family protein	81.268	100.027	68.5643	197.746	145.887	0.29963	-0.24523	1.28289	0.844092	_	_	U	_
AT1G18250	Chr1:6276788-6278150[-]	protein_coding_gene	ATLP-1	Pathogenesis-related thaumatin superfamily protein	29.2171	32.4233	25.2421	31.9463	18.8326	0.150218	-0.210981	0.128836	-0.633581	_	_	_	_
AT1G18260	Chr1:6278848-6282103[-]	protein_coding_gene	#N/A	HCP-like superfamily protein	24.769	21.6203	23.7524	20.2599	17.8357	-0.196149	-0.0604623	-0.289908	-0.473768	_	_	_	_
AT1G18265	Chr1:6282252-6283293[-]	protein_coding_gene	#N/A	Protein of unknown function, DUF593	2.04093	1.26531	2.77936	1.20077	1.53718	-0.689731	0.445524	-0.765262	-0.408938	_	_	_	_
AT1G18270	Chr1:6283412-6293871[-]	protein_coding_gene	#N/A	ketose-bisphosphate aldolase class-II family protein	14.3994	17.1281	17.5604	25.6808	15.7651	0.250356	0.286317	0.834681	0.130726	_	_	_	_
AT1G18280	Chr1:6294333-6295364[+]	protein_coding_gene	#N/A	Bifunctional inhibitor/lipid-transfer protein/seed storage 2S albumin superfamily protein	0.200099	0.176488	0.247987	0.861956	0.948107	-0.181134	0.309537	2.10684	2.24428	_	_	U	U
AT1G18290	Chr1:6297364-6298328[+]	protein_coding_gene	#N/A	unknown protein; FUNCTIONS IN: molecular_function unknown; INVOLVED IN: N-terminal protein myristoylation; LOCATED IN: chloroplast; EXPRESSED IN: root; Has 94 Blast hits to 94 proteins in 12 species: Archae - 0; Bacteria - 0; Metazoa - 0; Fungi - 0; Plants - 94; Viruses - 0; Other Eukaryotes - 0 (source: NCBI BLink).	4.24663	1.34561	2.56067	1.77158	1.69004	-1.65805	-0.729795	-1.26128	-1.32926	D	_	D	D
AT1G18300	Chr1:6299687-6301086[+]	protein_coding_gene	atnudt4, NUDT4	nudix hydrolase homolog 4	20.2854	4.86439	4.18225	19.3576	23.4633	-2.06011	-2.27809	-0.0675416	0.209964	D	D	_	_
AT1G18320	Chr1:6304360-6305689[+]	protein_coding_gene	#N/A	Mitochondrial import inner membrane translocase subunit Tim17/Tim22/Tim23 family protein	6.8212	7.11751	4.79519	5.99457	5.0248	0.061347	-0.508437	-0.186369	-0.440959	_	_	_	_
AT1G18330	Chr1:6305966-6308013[-]	protein_coding_gene	EPR1, RVE7	Homeodomain-like superfamily protein	28.9278	6.88109	7.76887	6.32644	7.48125	-2.07175	-1.89668	-2.19299	-1.9511	D	D	D	D
AT1G18335	Chr1:6309041-6311326[-]	protein_coding_gene	#N/A	Acyl-CoA N-acyltransferases (NAT) superfamily protein	7.15662	6.61821	6.56776	8.10665	7.17027	-0.112837	-0.123877	0.179827	0.00274906	_	_	_	_
AT1G18340	Chr1:6311483-6313931[-]	protein_coding_gene	#N/A	basal transcription factor complex subunit-related	15.5506	14.5784	13.6412	14.5384	13.5668	-0.0931378	-0.189	-0.0971017	-0.19689	_	_	_	_
AT1G18350	Chr1:6315651-6316738[+]	protein_coding_gene	ATMKK7, BUD1, MKK7	MAP kinase kinase 7	2.54078	0.96591	1.15915	0.194552	0.244028	-1.3953	-1.1322	-3.70698	-3.3801	D	D	D	D
AT1G18360	Chr1:6316695-6319427[-]	protein_coding_gene	#N/A	alpha/beta-Hydrolases superfamily protein	11.2723	20.2368	25.2405	17.3908	23.6075	0.844199	1.16296	0.625542	1.06646	_	U	_	U
AT1G18370	Chr1:6319650-6324222[-]	protein_coding_gene	HIK, ATNACK1, NACK1	ATP binding microtubule motor family protein	5.4229	7.04856	6.82854	7.51718	5.47426	0.378263	0.332512	0.471126	0.0135994	_	_	_	_
AT1G18382	Chr1:6326366-6326699[-]	other_RNA	#N/A	other RNA	3.29668	1.67795	1.46034	5.40532	5.30411	-0.97431	-1.1747	0.713364	0.686095	_	D	_	_
AT1G18390	Chr1:6325642-6330098[+]	protein_coding_gene	#N/A	Protein kinase superfamily protein	7.75255	6.92044	5.68063	17.6678	12.3737	-0.163807	-0.448619	1.18838	0.674533	_	_	U	_
AT1G18400	Chr1:6331398-6333743[+]	protein_coding_gene	BEE1	BR enhanced expression 1	18.7243	14.1961	8.08333	10.1888	6.07615	-0.399417	-1.21189	-0.877927	-1.62368	_	D	_	D
AT1G18410	Chr1:6336528-6342460[-]	protein_coding_gene	#N/A	P-loop containing nucleoside triphosphate hydrolases superfamily protein	0.0924661	0.119534	0.109688	0.111159	0.12399	0.370389	0.246385	0.265602	0.423188	_	_	_	_
AT1G18415	Chr1:6343096-6345662[-]	other_RNA	#N/A	other RNA	3.71787	4.22797	3.69395	3.63733	2.52909	0.185488	-0.00931196	-0.0315964	-0.555856	_	_	_	_
AT1G18420	Chr1:6343330-6345689[+]	protein_coding_gene	#N/A	Aluminium activated malate transporter family protein	1.03252	1.01681	0.99018	0.512568	0.435242	-0.0221194	-0.0604064	-1.01034	-1.24626	_	_	D	D
AT1G18430	Chr1:6345764-6345835[+]	tRNA	#N/A	pre-tRNA	0	0	0	0	0	0	0	0	0	_	_	_	_
AT1G18440	Chr1:6345974-6347910[+]	protein_coding_gene	#N/A	Peptidyl-tRNA hydrolase family protein	20.0973	17.7682	15.7646	16.8861	16.8551	-0.177704	-0.350313	-0.251165	-0.253816	_	_	_	_
AT1G18450	Chr1:6348107-6351975[+]	protein_coding_gene	ATARP4, ARP4	actin-related protein 4	33.2024	31.1366	27.3728	34.2366	33.9009	-0.0926761	-0.278544	0.0442519	0.030036	_	_	_	_
AT1G18460	Chr1:6352470-6356113[+]	protein_coding_gene	#N/A	alpha/beta-Hydrolases superfamily protein	26.5693	23.7781	25.7976	16.7023	22.515	-0.160127	-0.0425233	-0.669713	-0.238874	_	_	_	_
AT1G18470	Chr1:6356131-6360192[-]	protein_coding_gene	#N/A	Transmembrane Fragile-X-F-associated protein	19.5927	15.2996	17.7861	34.0043	27.5001	-0.356822	-0.139566	0.795401	0.48912	_	_	_	_
AT1G18480	Chr1:6361629-6363007[+]	protein_coding_gene	#N/A	Calcineurin-like metallo-phosphoesterase superfamily protein	14.3583	18.2513	15.4417	17.0588	15.8281	0.346114	0.104947	0.248631	0.140603	_	_	_	_
AT1G18485	Chr1:6363172-6366235[+]	protein_coding_gene	#N/A	Pentatricopeptide repeat (PPR) superfamily protein	5.35096	4.8083	6.12752	5.46224	4.26322	-0.154271	0.195505	0.0296949	-0.327854	_	_	_	_
AT1G18486	Chr1:6366397-6366753[+]	protein_coding_gene	#N/A	unknown protein; FUNCTIONS IN: molecular_function unknown; INVOLVED IN: biological_process unknown; LOCATED IN: endomembrane system; BEST Arabidopsis thaliana protein match is: unknown protein (TAIR:AT4G02655.1); Has 30201 Blast hits to 17322 proteins in 780 species: Archae - 12; Bacteria - 1396; Metazoa - 17338; Fungi - 3422; Plants - 5037; Viruses - 0; Other Eukaryotes - 2996 (source: NCBI BLin…	0.0399955	0	0	0.144763	0.773398	-11.966	-11.966	1.85552	4.27296	_	_	_	U
AT1G18490	Chr1:6366520-6368849[+]	protein_coding_gene	#N/A	Protein of unknown function (DUF1637)	8.2835	7.78816	8.31597	7.29474	7.25769	-0.0889578	0.00564407	-0.183384	-0.19073	_	_	_	_
AT1G18500	Chr1:6369347-6373025[+]	protein_coding_gene	MAML-4, IPMS1	methylthioalkylmalate synthase-like 4	83.7113	83.5908	58.2769	91.5178	68.0314	-0.00207821	-0.522498	0.12863	-0.299222	_	_	_	_
AT1G18510	Chr1:6373295-6374090[+]	protein_coding_gene	TET16	tetraspanin 16	0	0	0	0.330574	0.763026	0	0	15.0127	16.2195	_	_	U	U
AT1G18540	Chr1:6377321-6378580[-]	protein_coding_gene	#N/A	Ribosomal protein L6 family protein	749.903	760.695	710.355	619.665	700.277	0.0206141	-0.0781638	-0.275216	-0.0987783	_	_	_	_
AT1G18550	Chr1:6381503-6384340[-]	protein_coding_gene	#N/A	ATP binding microtubule motor family protein	2.90021	4.53716	4.80395	3.4514	3.18761	0.64563	0.728062	0.251024	0.136317	_	_	_	_
AT1G18560	Chr1:6385449-6388080[+]	protein_coding_gene	#N/A	BED zinc finger ;hAT family dimerisation domain	2.66557	3.651	3.83838	2.84739	2.21524	0.453846	0.526052	0.0951957	-0.26698	_	_	_	_
AT1G18570	Chr1:6389411-6391267[+]	protein_coding_gene	MYB51, AtMYB51, BW51A, BW51B, HIG1	myb domain protein 51	27.9031	13.366	14.144	24.1697	21.4261	-1.06186	-0.980235	-0.207226	-0.381056	D	_	_	_
AT1G18580	Chr1:6395864-6398239[+]	protein_coding_gene	GAUT11	galacturonosyltransferase 11	12.3224	15.7869	18.0938	11.9064	10.2857	0.357444	0.554212	-0.049546	-0.260643	_	_	_	_
AT1G18590	Chr1:6398580-6399942[+]	protein_coding_gene	SOT17, ATSOT17, ATST5C	sulfotransferase 17	34.5701	32.7671	26.5296	33.2705	19.9057	-0.0772768	-0.381922	-0.0552812	-0.796343	_	_	_	_
AT1G18600	Chr1:6400404-6402791[+]	protein_coding_gene	ATRBL12, RBL12	RHOMBOID-like protein 12	20.3535	19.842	18.867	16.894	17.3771	-0.0367194	-0.109412	-0.268766	-0.228089	_	_	_	_
AT1G18610	Chr1:6405645-6409297[+]	protein_coding_gene	#N/A	Galactose oxidase/kelch repeat superfamily protein	5.56817	6.13482	4.56691	5.49237	4.5361	0.139818	-0.285984	-0.0197744	-0.29575	_	_	_	_
AT1G18620	Chr1:6409978-6414451[+]	protein_coding_gene	#N/A	unknown protein; FUNCTIONS IN: molecular_function unknown; INVOLVED IN: biological_process unknown; LOCATED IN: cellular_component unknown; EXPRESSED IN: 22 plant structures; EXPRESSED DURING: 13 growth stages; BEST Arabidopsis thaliana protein match is: unknown protein (TAIR:AT1G74160.1); Has 1906 Blast hits to 1265 proteins in 203 species: Archae - 0; Bacteria - 130; Metazoa - 671; Fungi - 139;…	22.6523	12.0026	17.5798	12.1901	8.08253	-0.91631	-0.365739	-0.893947	-1.48678	_	_	_	D
AT1G18630	Chr1:6414725-6416459[+]	protein_coding_gene	GR-RBP6	glycine-rich RNA-binding protein 6	36.6581	32.4073	29.5719	26.4735	25.7072	-0.177813	-0.309905	-0.469583	-0.511959	_	_	_	_
AT1G18640	Chr1:6416357-6418690[-]	protein_coding_gene	PSP	3-phosphoserine phosphatase	32.3801	26.5176	25.6073	22.8713	23.5781	-0.288157	-0.338552	-0.501569	-0.45766	_	_	_	_
AT1G18650	Chr1:6418858-6420557[-]	protein_coding_gene	PDCB3	plasmodesmata callose-binding protein 3	39.2349	26.4005	25.2977	18.8085	13.2723	-0.571572	-0.633131	-1.06075	-1.56372	_	_	D	D
AT1G18660	Chr1:6421117-6425880[+]	protein_coding_gene	#N/A	zinc finger (C3HC4-type RING finger) family protein	26.4252	24.0071	22.2866	30.3122	31.6507	-0.138453	-0.245738	0.197984	0.260323	_	_	_	_
AT1G18670	Chr1:6426898-6430696[-]	protein_coding_gene	IBS1	Protein kinase superfamily protein	6.25609	7.62978	11.8051	7.70054	11.2552	0.28638	0.916076	0.299698	0.847257	_	_	_	_
AT1G18680	Chr1:6431938-6433464[-]	protein_coding_gene	#N/A	HNH endonuclease domain-containing protein	13.275	9.78802	9.30488	8.78103	9.9718	-0.439623	-0.512652	-0.596249	-0.412786	_	_	_	_
AT1G18690	Chr1:6433574-6436922[+]	protein_coding_gene	#N/A	Galactosyl transferase GMA12/MNN10 family protein	3.157	4.27344	4.1431	4.9128	3.22002	0.436842	0.392155	0.63799	0.0285153	_	_	_	_
AT1G18700	Chr1:6437477-6444076[+]	protein_coding_gene	#N/A	DNAJ heat shock N-terminal domain-containing protein	19.3375	19.2169	19.5056	22.0754	17.1205	-0.00902566	0.0124871	0.191038	-0.175676	_	_	_	_
AT1G18710	Chr1:6450594-6453114[+]	protein_coding_gene	AtMYB47, MYB47	myb domain protein 47	1.74768	3.92864	8.21871	4.46786	6.36346	1.16858	2.23346	1.35414	1.86436	U	U	U	U
AT1G18720	Chr1:6457821-6459751[-]	protein_coding_gene	#N/A	Protein of unknown function (DUF962)	112.112	121.829	184.26	104.152	106.276	0.119917	0.716802	-0.10625	-0.0771249	_	_	_	_
AT1G18730	Chr1:6460598-6462224[+]	protein_coding_gene	NDF6	NDH dependent flow 6	122.292	83.7692	79.2011	79.9616	93.9501	-0.545838	-0.626738	-0.612951	-0.380363	_	_	_	_
AT1G18735	Chr1:6461232-6461752[-]	other_RNA	#N/A	other RNA	0.073742	0.0257646	0.0898583	0.0675828	0.024092	-1.51673	0.28513	-0.125813	-1.61353	_	_	_	_
AT1G18740	Chr1:6463922-6465476[+]	protein_coding_gene	#N/A	Protein of unknown function (DUF793)	27.3538	27.9542	29.8725	52.2084	49.85	0.0313238	0.127077	0.93254	0.865852	_	_	_	_
AT1G18745	Chr1:6465487-6466454[-]	other_RNA	#N/A	#N/A	8.98303	9.66486	6.12982	6.83771	3.59131	0.105547	-0.551357	-0.393688	-1.32269	_	_	_	D
AT1G18750	Chr1:6466761-6469984[+]	protein_coding_gene	AGL65	AGAMOUS-like 65	3.27976	2.87537	2.2102	5.42786	3.9337	-0.189842	-0.569411	0.726792	0.262296	_	_	_	_
AT1G18773	Chr1:6474802-6475904[+]	protein_coding_gene	#N/A	FUNCTIONS IN: molecular_function unknown; INVOLVED IN: biological_process unknown; LOCATED IN: endomembrane system; BEST Arabidopsis thaliana protein match is: carboxylesterases (TAIR:AT4G22300.1); Has 30201 Blast hits to 17322 proteins in 780 species: Archae - 12; Bacteria - 1396; Metazoa - 17338; Fungi - 3422; Plants - 5037; Viruses - 0; Other Eukaryotes - 2996 (source: NCBI BLink).	4.60061	2.53803	2.01303	2.93735	3.12802	-0.858113	-1.19245	-0.647308	-0.556574	_	D	_	_
AT1G18800	Chr1:6481113-6483596[-]	protein_coding_gene	NRP2	NAP1-related protein 2	65.0348	65.9677	74.9976	60.538	63.0892	0.0205479	0.205632	-0.103371	-0.0438188	_	_	_	_
AT1G18810	Chr1:6485596-6487030[-]	protein_coding_gene	#N/A	phytochrome kinase substrate-related	7.53015	9.44266	12.0218	6.3311	8.73375	0.326514	0.674902	-0.250222	0.213922	_	_	_	_
AT1G18830	Chr1:6489309-6494218[+]	protein_coding_gene	#N/A	Transducin/WD40 repeat-like superfamily protein	0.231648	0.692005	1.29688	0.271164	1.00092	1.57881	2.48499	0.227222	2.11127	U	U	_	U
AT1G18835	Chr1:6496098-6496396[-]	protein_coding_gene	MIF3	mini zinc finger	3.20785	3.03737	2.70093	3.69174	1.85533	-0.0787838	-0.24815	0.202694	-0.789928	_	_	_	_
AT1G18840	Chr1:6500848-6504413[-]	protein_coding_gene	IQD30	IQ-domain 30	13.8049	17.7235	23.0891	15.2304	15.8464	0.360483	0.742031	0.141773	0.198975	_	_	_	_
AT1G18850	Chr1:6504806-6506424[-]	protein_coding_gene	#N/A	unknown protein; FUNCTIONS IN: molecular_function unknown; INVOLVED IN: biological_process unknown; LOCATED IN: nucleolus; EXPRESSED IN: 22 plant structures; EXPRESSED DURING: 13 growth stages; Has 40 Blast hits to 40 proteins in 13 species: Archae - 0; Bacteria - 0; Metazoa - 0; Fungi - 0; Plants - 40; Viruses - 0; Other Eukaryotes - 0 (source: NCBI BLink).	18.6434	23.0055	15.0985	18.1126	16.3195	0.303314	-0.30426	-0.0416713	-0.192068	_	_	_	_
AT1G18860	Chr1:6509492-6511227[+]	protein_coding_gene	WRKY61, ATWRKY61	WRKY DNA-binding protein 61	2.50933	2.0263	3.14367	2.14085	1.83724	-0.308453	0.325146	-0.229118	-0.44976	_	_	_	_
AT1G18870	Chr1:6515429-6519282[+]	protein_coding_gene	ICS2	isochorismate synthase 2	1.13492	2.77879	18.4805	2.02749	9.41779	1.29186	4.02533	0.837099	3.05279	U	U	_	U
AT1G18880	Chr1:6520748-6523368[+]	protein_coding_gene	#N/A	Major facilitator superfamily protein	11.3964	9.13844	7.60183	11.3879	11.9138	-0.318558	-0.584159	-0.00107643	0.0640554	_	_	_	_
AT1G18890	Chr1:6522764-6525962[-]	protein_coding_gene	ATCDPK1, CPK10, CDPK1, AtCPK10	calcium-dependent protein kinase 1	16.6478	20.1709	25.3699	29.1584	28.3287	0.276944	0.607786	0.80858	0.766933	_	_	_	_
AT1G18900	Chr1:6528984-6532614[+]	protein_coding_gene	#N/A	Pentatricopeptide repeat (PPR) superfamily protein	6.14926	10.0338	8.35562	10.8871	9.76244	0.706382	0.442333	0.824134	0.666828	_	_	_	_
AT1G18910	Chr1:6532559-6538145[-]	protein_coding_gene	#N/A	zinc ion binding;zinc ion binding	4.38996	5.72152	3.69402	7.33792	6.06142	0.38219	-0.249015	0.741162	0.465447	_	_	_	_
AT1G18940	Chr1:6543852-6545592[+]	protein_coding_gene	#N/A	Nodulin-like / Major Facilitator Superfamily protein	0.954288	1.19601	1.48559	0.976581	1.02038	0.32573	0.638534	0.0333146	0.0966089	_	_	_	_
AT1G18950	Chr1:6546399-6551887[+]	protein_coding_gene	#N/A	DDT domain superfamily	12.8879	12.5353	12.4844	15.1823	11.9599	-0.0400206	-0.0458907	0.236373	-0.107812	_	_	_	_
AT1G18960	Chr1:6552752-6553940[+]	protein_coding_gene	#N/A	myb-like HTH transcriptional regulator family protein	0.0504448	0.0681136	0.0391811	0.0791161	0.340006	0.433163	-0.364465	0.649162	2.75254	_	_	_	U
AT1G18970	Chr1:6554568-6555377[-]	protein_coding_gene	GLP4	germin-like protein 4	9.51171	6.7527	5.67903	4.44775	4.03106	-0.49424	-0.744059	-1.09663	-1.23854	_	_	D	D
AT1G18980	Chr1:6557254-6558045[-]	protein_coding_gene	#N/A	RmlC-like cupins superfamily protein	18.2791	13.3047	11.9376	6.67054	6.27142	-0.458259	-0.614682	-1.45432	-1.54333	_	_	D	D
AT1G18990	Chr1:6558678-6560489[-]	protein_coding_gene	#N/A	Protein of unknown function, DUF593	0.773567	0.14616	0.157697	0.417983	2.74208	-2.4039	-2.2943	-0.888066	1.82566	D	D	_	U
AT1G19000	Chr1:6560792-6562786[-]	protein_coding_gene	#N/A	Homeodomain-like superfamily protein	190.1	91.6039	116.851	58.959	103.786	-1.05328	-0.702088	-1.68897	-0.873147	D	_	D	_
AT1G19010	Chr1:6565494-6567525[+]	protein_coding_gene	#N/A	unknown protein; BEST Arabidopsis thaliana protein match is: unknown protein (TAIR:AT1G74860.1); Has 238 Blast hits to 225 proteins in 78 species: Archae - 0; Bacteria - 7; Metazoa - 99; Fungi - 18; Plants - 69; Viruses - 0; Other Eukaryotes - 45 (source: NCBI BLink).	7.71514	3.95046	5.44028	4.04613	4.51026	-0.96567	-0.504011	-0.931148	-0.77448	_	_	_	_
AT1G19020	Chr1:6568073-6568597[+]	protein_coding_gene	#N/A	unknown protein; BEST Arabidopsis thaliana protein match is: unknown protein (TAIR:AT3G48180.1); Has 88 Blast hits to 88 proteins in 15 species: Archae - 0; Bacteria - 0; Metazoa - 0; Fungi - 0; Plants - 88; Viruses - 0; Other Eukaryotes - 0 (source: NCBI BLink).	46.7585	39.6329	34.9834	144.207	101.201	-0.23853	-0.418558	1.62484	1.11392	_	_	U	U
AT1G19025	Chr1:6568853-6570939[+]	protein_coding_gene	#N/A	DNA repair metallo-beta-lactamase family protein	2.5646	2.51409	3.15091	7.71584	6.10694	-0.0286974	0.297034	1.58909	1.25171	_	_	U	U
AT1G19030	Chr1:6571184-6572937[+]	transposable_element_gene	#N/A	transposable element gene	0.00609466	0.00633251	0.00547544	0.982673	0.571459	0.0551413	-0.154304	7.33067	6.54862	_	_	U	U
AT1G19040	Chr1:6576895-6577413[+]	protein_coding_gene	#N/A	NAC (No Apical Meristem) domain transcriptional regulator superfamily protein	0.0178326	0	0	0.0819504	0.0348865	-10.8011	-10.8011	2.1996	0.967756	_	_	_	_
AT1G19050	Chr1:6577833-6579178[-]	protein_coding_gene	ARR7	response regulator 7	15.0492	14.9144	9.0614	99.7039	69.2189	-0.0129808	-0.73188	2.72796	2.20148	_	_	U	U
AT1G19070	Chr1:6584454-6584705[+]	protein_coding_gene	#N/A	F-box family protein	11.1708	12.7996	9.13702	16.9426	9.19997	0.196366	-0.289937	0.600922	-0.280031	_	_	_	_
AT1G19080	Chr1:6584241-6586517[+]	protein_coding_gene	TTN10	GINS complex protein	10.9932	10.3298	9.28438	12.5125	11.2925	-0.089799	-0.243734	0.186759	0.0387535	_	_	_	_
AT1G19100	Chr1:6594930-6601355[+]	protein_coding_gene	#N/A	Histidine kinase-, DNA gyrase B-, and HSP90-like ATPase family protein	5.48631	4.83933	4.87841	6.70823	5.06329	-0.181028	-0.169425	0.290096	-0.115761	_	_	_	_
AT1G19110	Chr1:6602126-6605908[+]	protein_coding_gene	#N/A	inter-alpha-trypsin inhibitor heavy chain-related	19.0398	22.0301	19.9544	24.7005	24.7458	0.210458	0.0676885	0.375522	0.378165	_	_	_	_
AT1G19115	Chr1:6606237-6607943[+]	protein_coding_gene	#N/A	unknown protein; FUNCTIONS IN: molecular_function unknown; INVOLVED IN: biological_process unknown; LOCATED IN: cellular_component unknown; BEST Arabidopsis thaliana protein match is: unknown protein (TAIR:AT1G72490.1); Has 30201 Blast hits to 17322 proteins in 780 species: Archae - 12; Bacteria - 1396; Metazoa - 17338; Fungi - 3422; Plants - 5037; Viruses - 0; Other Eukaryotes - 2996 (source: NC…	0.0294807	0.108225	0.0750446	0.229737	0.448037	1.87584	1.34768	2.96171	3.92532	_	_	U	U
AT1G19120	Chr1:6608115-6609369[+]	protein_coding_gene	#N/A	Small nuclear ribonucleoprotein family protein	34.2447	28.2683	27.2164	29.7933	30.5407	-0.276696	-0.331404	-0.200893	-0.165148	_	_	_	_
AT1G19130	Chr1:6609325-6610613[-]	protein_coding_gene	#N/A	CONTAINS InterPro DOMAIN/s: Protein of unknown function DUF985 (InterPro:IPR009327), RmlC-like jelly roll fold (InterPro:IPR014710); Has 1465 Blast hits to 1465 proteins in 584 species: Archae - 10; Bacteria - 1038; Metazoa - 19; Fungi - 43; Plants - 51; Viruses - 0; Other Eukaryotes - 304 (source: NCBI BLink).	57.666	55.9981	52.0654	52.8753	59.6873	-0.0423431	-0.147396	-0.125127	0.049703	_	_	_	_
AT1G19140	Chr1:6610721-6612516[-]	protein_coding_gene	#N/A	FUNCTIONS IN: molecular_function unknown; INVOLVED IN: ubiquinone biosynthetic process; LOCATED IN: mitochondrion; EXPRESSED IN: 24 plant structures; EXPRESSED DURING: 15 growth stages; CONTAINS InterPro DOMAIN/s: COQ9 (InterPro:IPR013718), Ubiquinone biosynthesis protein COQ9 (InterPro:IPR012762); Has 748 Blast hits to 748 proteins in 260 species: Archae - 0; Bacteria - 218; Metazoa - 126; Fungi…	23.805	21.6743	17.4489	20.8518	24.1755	-0.135279	-0.448128	-0.191093	0.0222811	_	_	_	_
AT1G19150	Chr1:6612749-6613972[+]	protein_coding_gene	LHCA6, LHCA2*1	photosystem I light harvesting complex gene 6	60.2888	33.7282	34.6337	29.0496	30.8187	-0.837934	-0.799713	-1.05337	-0.968084	_	_	D	_
AT1G19160	Chr1:6614162-6615214[-]	protein_coding_gene	#N/A	F-box family protein	0.199773	0.115202	0.131786	0.206738	0.213941	-0.794143	-0.600127	0.0494395	0.0988466	_	_	_	_
AT1G19170	Chr1:6616643-6618986[+]	protein_coding_gene	#N/A	Pectin lyase-like superfamily protein	9.03763	9.38977	9.21448	9.75427	10.2907	0.0551453	0.0279582	0.110089	0.187325	_	_	_	_
AT1G19180	Chr1:6622094-6623620[+]	protein_coding_gene	TIFY10A	jasmonate-zim-domain protein 1	35.0312	92.0883	130.456	197.54	275.501	1.39438	1.89685	2.49543	2.97534	U	U	U	U
AT1G19190	Chr1:6623876-6624977[+]	protein_coding_gene	#N/A	alpha/beta-Hydrolases superfamily protein	1.15354	1.54217	2.16914	1.46536	2.18371	0.418891	0.911049	0.345184	0.920707	_	_	_	_
AT1G19200	Chr1:6625020-6625856[-]	protein_coding_gene	#N/A	Protein of unknown function (DUF581)	2.78885	6.33574	24.5398	5.24738	6.95768	1.18384	3.13738	0.911925	1.31893	U	U	_	U
AT1G19210	Chr1:6626822-6627530[-]	protein_coding_gene	#N/A	Integrase-type DNA-binding superfamily protein	0.0222521	0.0575096	0.0609031	1.26666	2.15037	1.36946	1.45216	5.83031	6.59386	_	_	U	U
AT1G19220	Chr1:6628068-6633087[-]	protein_coding_gene	ARF19, IAA22, ARF11	auxin response factor 19	5.1702	3.85602	4.44065	8.20866	4.11985	-0.423107	-0.219449	0.666926	-0.327628	_	_	_	_
AT1G19230	Chr1:6644189-6649375[+]	protein_coding_gene	#N/A	Riboflavin synthase-like superfamily protein	1.92619	2.65408	6.61942	1.7362	1.61201	0.46246	1.78095	-0.149816	-0.256888	_	U	_	_
AT1G19240	Chr1:6649243-6650420[-]	protein_coding_gene	#N/A	unknown protein; Has 24 Blast hits to 24 proteins in 11 species: Archae - 0; Bacteria - 0; Metazoa - 0; Fungi - 0; Plants - 24; Viruses - 0; Other Eukaryotes - 0 (source: NCBI BLink).	21.0115	17.8989	16.9814	15.8292	18.5373	-0.231308	-0.307224	-0.408591	-0.180748	_	_	_	_
AT1G19250	Chr1:6650529-6653078[-]	protein_coding_gene	FMO1	flavin-dependent monooxygenase 1	1.41542	2.10275	4.36448	2.08351	2.06252	0.571044	1.62457	0.557783	0.543175	_	U	_	_
AT1G19270	Chr1:6662501-6666028[+]	protein_coding_gene	DA1	DA1	5.99268	5.78186	9.31684	7.49892	5.68668	-0.0516676	0.636639	0.323481	-0.0756146	_	_	_	_
AT1G19290	Chr1:6666249-6668963[+]	protein_coding_gene	#N/A	Pentatricopeptide repeat (PPR) superfamily protein	4.39321	5.79899	4.82279	5.47129	4.49579	0.400525	0.134592	0.316605	0.0332991	_	_	_	_
AT1G19300	Chr1:6671137-6672653[-]	protein_coding_gene	GATL1, PARVUS, GLZ1, ATGATL1	Nucleotide-diphospho-sugar transferases superfamily protein	8.26218	12.0873	8.33355	19.3467	14.8848	0.548897	0.0124087	1.22749	0.849245	_	_	U	_
AT1G19310	Chr1:6676234-6677673[-]	protein_coding_gene	#N/A	RING/U-box superfamily protein	18.6562	17.8211	25.761	28.6814	37.4344	-0.0660687	0.465533	0.62046	1.00471	_	_	_	U
AT1G19320	Chr1:6679281-6680252[+]	protein_coding_gene	#N/A	Pathogenesis-related thaumatin superfamily protein	2.0539	0.890351	0.610223	4.42388	2.11089	-1.20591	-1.75094	1.10694	0.0394853	D	D	U	_
AT1G19330	Chr1:6680563-6683533[-]	protein_coding_gene	#N/A	unknown protein; FUNCTIONS IN: molecular_function unknown; INVOLVED IN: biological_process unknown; LOCATED IN: cellular_component unknown; EXPRESSED IN: 22 plant structures; EXPRESSED DURING: 13 growth stages; BEST Arabidopsis thaliana protein match is: unknown protein (TAIR:AT1G75060.1).	7.81441	6.47311	8.08024	9.93311	12.1945	-0.271678	0.0482611	0.346108	0.642021	_	_	_	_
AT1G19340	Chr1:6684751-6687116[+]	protein_coding_gene	#N/A	Methyltransferase MT-A70 family protein	2.70487	2.44906	2.42569	2.20202	2.14442	-0.143331	-0.157163	-0.29673	-0.33497	_	_	_	_
AT1G19350	Chr1:6688522-6690414[+]	protein_coding_gene	BES1, BZR2	Brassinosteroid signalling positive regulator (BZR1) family protein	271.498	251.499	301.073	98.9702	108.402	-0.110389	0.149172	-1.45588	-1.32455	_	_	D	D
AT1G19360	Chr1:6690456-6692477[-]	protein_coding_gene	#N/A	Nucleotide-diphospho-sugar transferase family protein	25.9895	26.4684	25.0247	28.1636	22.1286	0.0263421	-0.0545761	0.115903	-0.232017	_	_	_	_
AT1G19370	Chr1:6692764-6694934[-]	protein_coding_gene	#N/A	unknown protein; LOCATED IN: endoplasmic reticulum; EXPRESSED IN: 22 plant structures; EXPRESSED DURING: 13 growth stages; BEST Arabidopsis thaliana protein match is: unknown protein (TAIR:AT1G75140.1); Has 45 Blast hits to 43 proteins in 15 species: Archae - 0; Bacteria - 0; Metazoa - 0; Fungi - 0; Plants - 44; Viruses - 0; Other Eukaryotes - 1 (source: NCBI BLink).	7.90177	13.2051	17.5046	17.9701	14.3508	0.740847	1.14749	1.18535	0.860883	_	U	U	_
AT1G19373	Chr1:6697178-6697253[+]	snoRNA	#N/A	snoRNA	0	0	0	0	0	0	0	0	0	_	_	_	_
AT1G19376	Chr1:6697438-6697524[+]	snoRNA	#N/A	snoRNA	0	0	0	0	0	0	0	0	0	_	_	_	_
AT1G19380	Chr1:6698058-6698824[+]	protein_coding_gene	#N/A	Protein of unknown function (DUF1195)	83.5582	43.931	25.4969	110.044	76.5157	-0.927542	-1.71246	0.397227	-0.127026	_	D	_	_
AT1G19394	Chr1:6709773-6710670[+]	protein_coding_gene	#N/A	unknown protein; Has 35333 Blast hits to 34131 proteins in 2444 species: Archae - 798; Bacteria - 22429; Metazoa - 974; Fungi - 991; Plants - 531; Viruses - 0; Other Eukaryotes - 9610 (source: NCBI BLink).	5.00761	5.95262	8.88108	9.38735	4.70642	0.249402	0.826612	0.906594	-0.089492	_	_	_	_
[truncated: 22,963 more rows]
