# Supplementary material for: Dehydration stress extends mRNA 3′ untranslated regions with noncoding RNA functions in Arabidopsis
Source: HighWire-hosted journal article supplement (doi:10.1101/gr.218669.116), 2017-05-18
Supplement: Supplemental_Table_S3.xlsx [file Supplemental_Table_S3.xlsx]

## Sheet: Supplemental Table 3
Supplemental Table 3. Tabulated data of expression levels of 1,409 dehydration stress-induced 3' UTR extensions.
Column A-D: gene ID, locus, symbol and annotation of gene exhibiting 3' UTR extension of its mRNA;
Column E-F: locus and length of 3' UTR extensions;
Column G-K: FPKMs of extended 3' UTRs in NC, ABA_1h, ABA_3h, Dehy_1h, and Dehy_3h;
Column L: gain of miRNA target site within extended 3' UTRs;
Column M: category of 3' UTR extensions, "Antisnese" for 605 3' UTR extensions overlapped with sense genes, "Sense" for 429 3' UTR extensions that extended into the promoter regions of their downstream genes;
Column N-R: ID of sense gene, category and length of overlapping region with canonical 3' UTR and extended 3' UTR;
Column S-U: ID of downstream gene and length of intergenic region with canonical 3' UTR and extended 3' UTR.
Gene ID	Gene locus	Symbol	Annotation	Locus of 3' UTR extension	Length of 3' UTR extension (nt)	NC	ABA_1h	ABA_3h	Dehy_1h	Dehy_3h	Gain of miRNA target site	Category	Sense gene ID	Overlapping region with canonical 3' UTR	Overlapping region with extended 3' UTR	Length of overlapping region with canonical 3' UTR (nt)	Length of overlapping region with extended 3' UTR (nt)	Downstream gene ID	Length of intergenic region with canonical 3' UTR (nt)	Length of intergenic region with extended 3' UTR (nt)
AT4G28140	Chr4:13974691-13975908[-]	#N/A	Integrase-type DNA-binding superfamily protein	Chr4:13973551-13974690[-]	1140	0	0	0.00409037	0.116464	4.3515	No	Antisense	AT4G28130	Non-overlapped	CDS	0	773	#N/A	#N/A	#N/A
AT2G30830	Chr2:13132707-13134284[-]	#N/A	2-oxoglutarate (2OG) and Fe(II)-dependent oxygenase superfamily protein	Chr2:13132497-13132706[-]	210	0	0	0	0.278182	3.77459	No	Antisense	AT2G30820	3' UTR	3' UTR	239	449	#N/A	#N/A	#N/A
AT2G35680	Chr2:14996713-14999085[-]	#N/A	Phosphotyrosine protein phosphatases superfamily protein	Chr2:14995993-14996712[-]	720	0	0	0.0194292	0.700725	1.62586	No	Antisense	AT2G35670	3' UTR	CDS	44	764	#N/A	#N/A	#N/A
AT2G03420	Chr2:1034998-1035969[-]	#N/A	unknown protein; Has 38 Blast hits to 38 proteins in 17 species: Archae - 0; Bacteria - 0; Metazoa - 0; Fungi - 0; Plants - 38; Viruses - 0; Other Eukaryotes - 0 (source: NCBI BLink).	Chr2:1033388-1034887[-]	1500	0	0.0650304	0	0.698197	1.58217	No	Antisense	AT2G03410	3' UTR	Promoter	972	2262	#N/A	#N/A	#N/A
AT5G51110	Chr5:20778132-20779464[-]	#N/A	Transcriptional coactivator/pterin dehydratase	Chr5:20777522-20778081[-]	560	0	0.0207575	0.00832682	0.9768	1.57483	No	Antisense	AT5G51105	Non-overlapped	Promoter	0	508	#N/A	#N/A	#N/A
AT4G11600	Chr4:7009769-7011375[-]	ATGPX6, PHGPX, LSC803, GPX6	glutathione peroxidase 6	Chr4:7008289-7009628[-]	1340	0	0.0650607	0.0487181	0.947217	1.3672	No	Antisense	AT4G11590	CDS	Promoter	28	1054	#N/A	#N/A	#N/A
AT3G14720	Chr3:4945601-4949042[+]	ATMPK19, MPK19	MAP kinase 19	Chr3:4949053-4949442[+]	390	0	0.0298056	0.0597823	0.231494	1.09027	No	Antisense	AT3G14730	Non-overlapped	CDS	0	58	#N/A	#N/A	#N/A
AT5G48930	Chr5:19836299-19838162[-]	HCT	hydroxycinnamoyl-CoA shikimate/quinate hydroxycinnamoyl transferase	Chr5:19836009-19836298[-]	290	0	0	0	0.476137	1.01368	No	Antisense	AT5G48920	Non-overlapped	CDS	0	114	#N/A	#N/A	#N/A
AT1G68890	Chr1:25896945-25906714[+]	#N/A	magnesium ion binding;thiamin pyrophosphate binding;hydro-lyases;catalytics;2-succinyl-5-enolpyruvyl-6-hydroxy-3-cyclohexene-1-carboxylic-acid synthases	Chr1:25906715-25907274[+]	560	0	0.0103787	0	0.483658	1.01239	No	Antisense	AT1G68905	Non-overlapped	Promoter	0	377	#N/A	#N/A	#N/A
AT5G44070	Chr5:17734738-17737859[+]	CAD1, ARA8, ATPCS1, PCS1	phytochelatin synthase 1 (PCS1)	Chr5:17737860-17740129[+]	2270	0	0.0430525	0.0345409	1.71124	1.011	No	Antisense	AT5G44080	Non-overlapped	Promoter	0	1222	#N/A	#N/A	#N/A
AT5G61495	Chr5:24732768-24733485[-]	#N/A	unknown protein; FUNCTIONS IN: molecular_function unknown; INVOLVED IN: biological_process unknown; LOCATED IN: cellular_component unknown; Has 0 Blast hits to 0 proteins in 0 species (source: NCBI BLink).	Chr5:24732368-24732767[-]	400	0	0.0145302	0	0.477968	1.01052	No	Antisense	AT5G61490	CDS	Promoter	718	844	#N/A	#N/A	#N/A
AT5G60790	Chr5:24453258-24455970[-]	ATGCN1, GCN1	ABC transporter family protein	Chr5:24451988-24453257[-]	1270	0	0.0457645	0.06609	0.347081	1.00442	No	Antisense	AT5G60780	Non-overlapped	CDS	0	769	#N/A	#N/A	#N/A
AT4G01150	Chr4:493548-494850[+]	#N/A	unknown protein; FUNCTIONS IN: molecular_function unknown; INVOLVED IN: biological_process unknown; LOCATED IN: thylakoid, chloroplast thylakoid membrane, chloroplast, plastoglobule, chloroplast envelope; EXPRESSED IN: 23 plant structures; EXPRESSED DURING: 14 growth stages; BEST Arabidopsis thaliana protein match is: unknown protein (TAIR:AT4G38100.1); Has 323 Blast hits to 323 proteins in 59 sp…	Chr4:494861-495150[+]	290	0	0.0400834	0.0643175	0.274694	0.868871	No	Antisense	AT4G01160	Non-overlapped	CDS	0	175	#N/A	#N/A	#N/A
AT3G15580	Chr3:5273895-5275095[-]	ATG8I, APG8H	Ubiquitin-like superfamily protein	Chr3:5273675-5273884[-]	210	0	0.221413	0.266458	0.252893	0.799913	No	Antisense	AT3G15578	Non-overlapped	Promoter	0	183	#N/A	#N/A	#N/A
AT4G04330	Chr4:2116553-2118597[-]	#N/A	Chaperonin-like RbcX protein	Chr4:2116173-2116542[-]	370	0	0.0471251	0.554521	0.157887	0.794508	No	Antisense	AT4G04320	3' UTR	CDS	141	511	#N/A	#N/A	#N/A
AT4G06599	Chr4:3665925-3667547[-]	#N/A	ubiquitin family protein	Chr4:3665685-3665894[-]	210	0	0.0553533	0.111024	0.252893	0.774916	No	Antisense	AT4G06598	3' UTR	3' UTR	57	267	#N/A	#N/A	#N/A
AT1G04770	Chr1:1336371-1337849[-]	#N/A	Tetratricopeptide repeat (TPR)-like superfamily protein	Chr1:1335991-1336320[-]	330	0	0.0352248	0.0565214	0.241398	0.763553	No	Antisense	AT1G04760	Non-overlapped	CDS	0	80	#N/A	#N/A	#N/A
AT1G73200	Chr1:27523454-27526718[-]	#N/A	Putative integral membrane protein conserved region (DUF2404)	Chr1:27521744-27523253[-]	1510	0	0.00384907	0.00308809	0.400944	0.716147	No	Antisense	AT1G73190	Non-overlapped	Promoter	0	1310	#N/A	#N/A	#N/A
AT5G02610	Chr5:587508-588800[+]	#N/A	Ribosomal L29 family protein	Chr5:588821-589050[+]	230	0	0	0.020274	0.115451	0.684708	No	Antisense	AT5G02615	Non-overlapped	Other noncoding gene	0	74	#N/A	#N/A	#N/A
AT4G04220	Chr4:2033427-2035946[+]	AtRLP46, RLP46	receptor like protein 46	Chr4:2035957-2036196[+]	240	0	0.145302	0.0582877	0.486819	0.612433	No	Antisense	AT4G04221	Other noncoding gene	Other noncoding gene	788	1028	#N/A	#N/A	#N/A
AT4G09320	Chr4:5923400-5924532[+]	NDPK1	Nucleoside diphosphate kinase family protein	Chr4:5924553-5924762[+]	210	0	0.0276766	0.0666146	0.202315	0.54994	No	Antisense	AT4G09340	Non-overlapped	3' UTR	0	161	#N/A	#N/A	#N/A
AT4G02920	Chr4:1292523-1294861[+]	#N/A	unknown protein; BEST Arabidopsis thaliana protein match is: unknown protein (TAIR:AT1G03340.1); Has 41 Blast hits to 41 proteins in 12 species: Archae - 0; Bacteria - 0; Metazoa - 0; Fungi - 0; Plants - 41; Viruses - 0; Other Eukaryotes - 0 (source: NCBI BLink).	Chr4:1295232-1295461[+]	230	0	0.02527	0.020274	0.0461805	0.433648	No	Antisense	AT4G02930	Non-overlapped	3' UTR	0	53	#N/A	#N/A	#N/A
AT1G09310	Chr1:3009055-3009880[+]	#N/A	Protein of unknown function, DUF538	Chr1:3009911-3010160[+]	250	0	0	0	0.148701	0.398957	No	Antisense	AT1G09320	Non-overlapped	3' UTR	0	220	#N/A	#N/A	#N/A
AT1G74170	Chr1:27891494-27896355[-]	AtRLP13, RLP13	receptor like protein 13	Chr1:27891194-27891443[-]	250	0	0.0232484	0.0373041	0.127458	0.314966	No	Antisense	AT1G74160	Non-overlapped	3' UTR	0	238	#N/A	#N/A	#N/A
AT4G05050	Chr4:2588004-2589386[-]	UBQ11	ubiquitin 11	Chr4:2587105-2587983[-]	879	0.00600275	0.079346	0.0265246	2.90007	5.1479	No	Antisense	AT4G05049	Non-overlapped	Other noncoding gene	0	246	#N/A	#N/A	#N/A
AT3G05640	Chr3:1640393-1643253[-]	#N/A	Protein phosphatase 2C family protein	Chr3:1638583-1640382[-]	1800	0.00293134	0.0581209	0.0984415	0.238984	2.1231	No	Antisense	AT3G05630	Non-overlapped	CDS	0	1766	#N/A	#N/A	#N/A
AT2G06050	Chr2:2359114-2362302[-]	OPR3	oxophytodienoate-reductase 3	Chr2:2358514-2359093[-]	580	0.00909727	0.0701459	0.0482381	6.2905	5.92823	No	Antisense	AT2G06045	Non-overlapped	Other noncoding gene	0	367	#N/A	#N/A	#N/A
AT2G03240	Chr2:973413-977337[-]	#N/A	EXS (ERD1/XPR1/SYG1) family protein	Chr2:972743-973412[-]	670	0.00787525	0	0.00695973	1.11764	4.71665	Yes	Antisense	AT2G03230	Non-overlapped	Promoter	0	459	#N/A	#N/A	#N/A
AT5G06520	Chr5:1987250-1989372[-]	#N/A	SWAP (Suppressor-of-White-APricot)/surp domain-containing protein	Chr5:1984630-1987249[-]	2620	0.0020139	0.0177468	0.00889889	0.0749992	1.13003	No	Antisense	AT5G06510	Non-overlapped	Promoter	0	2054	#N/A	#N/A	#N/A
AT3G45600	Chr3:16733755-16735951[-]	TET3	tetraspanin3	Chr3:16732765-16733754[-]	990	0.00532971	0.0117416	0.00471012	0.472067	2.34368	No	Antisense	AT3G45590	CDS	5' UTR	100	1090	#N/A	#N/A	#N/A
AT4G17770	Chr4:9876238-9880254[+]	ATTPS5, TPS5	trehalose phosphatase/synthase 5	Chr4:9880255-9881594[+]	1340	0.00787525	0.0693981	0.0139195	0.439921	3.21234	No	Antisense	AT4G17780	Non-overlapped	Promoter	0	1197	#N/A	#N/A	#N/A
AT1G19970	Chr1:6931012-6932689[-]	#N/A	ER lumen protein retaining receptor family protein	Chr1:6930162-6931011[-]	850	0.00620755	0.12308	0.433386	0.299901	2.51973	No	Antisense	AT1G19968	Non-overlapped	Other noncoding gene	0	725	#N/A	#N/A	#N/A
AT3G15880	Chr3:5364081-5372293[-]	WSIP2, TPR4	WUS-interacting protein 2	Chr3:5362721-5364080[-]	1360	0.00387972	0.0042736	0.00342869	0.402212	1.43201	No	Antisense	AT3G15870	CDS	Promoter	464	1657	#N/A	#N/A	#N/A
AT1G01730	Chr1:270956-272061[+]	#N/A	unknown protein; FUNCTIONS IN: molecular_function unknown; INVOLVED IN: biological_process unknown; LOCATED IN: chloroplast; EXPRESSED IN: 23 plant structures; EXPRESSED DURING: 13 growth stages; Has 42 Blast hits to 42 proteins in 17 species: Archae - 0; Bacteria - 2; Metazoa - 5; Fungi - 1; Plants - 34; Viruses - 0; Other Eukaryotes - 0 (source: NCBI BLink).	Chr1:272062-275365[+]	3304	0.00798489	0.00879554	0.00282265	1.73918	2.83444	No	Antisense	AT1G01740	Non-overlapped	Promoter	0	2459	#N/A	#N/A	#N/A
AT5G02380	Chr5:506498-507244[-]	MT2B	metallothionein 2B	Chr5:503088-506417[-]	3330	0.00633804	0.0209445	0.0238052	0.620386	1.95474	No	Antisense	AT5G02370	3' UTR	Promoter	747	3757	#N/A	#N/A	#N/A
AT2G17840	Chr2:7755605-7757852[-]	ERD7	Senescence/dehydration-associated protein-related	Chr2:7753975-7755604[-]	1630	0.0296799	0.0472232	0.0145719	7.22595	8.71077	No	Antisense	AT2G17830	Non-overlapped	Promoter	0	1395	#N/A	#N/A	#N/A
AT1G24160	Chr1:8553411-8556555[-]	#N/A	unknown protein; BEST Arabidopsis thaliana protein match is: unknown protein (TAIR:AT1G70100.3); Has 5230 Blast hits to 4162 proteins in 477 species: Archae - 30; Bacteria - 540; Metazoa - 2022; Fungi - 429; Plants - 280; Viruses - 32; Other Eukaryotes - 1897 (source: NCBI BLink).	Chr1:8552381-8553390[-]	1010	0.00522418	0.0230182	0.0138505	0.499527	1.45529	No	Antisense	AT1G24159	Non-overlapped	Promoter	0	611	#N/A	#N/A	#N/A
AT1G56580	Chr1:21198259-21198956[-]	SVB	Protein of unknown function, DUF538	Chr1:21195499-21198238[-]	2740	0.0154056	0.108181	0.0731788	0.63574	4.10375	No	Antisense	AT1G56570	Non-overlapped	Promoter	0	1918	#N/A	#N/A	#N/A
AT3G16060	Chr3:5447343-5451527[+]	#N/A	ATP binding microtubule motor family protein	Chr3:5451538-5452447[+]	910	0.00579826	0.0255477	0.0153726	0.443536	1.54022	No	Antisense	AT3G16070	Non-overlapped	Promoter	0	453	#N/A	#N/A	#N/A
AT2G47830	Chr2:19590856-19594014[-]	#N/A	Cation efflux family protein	Chr2:19586886-19590805[-]	3920	0.00807615	0.0207575	0.00951637	0.634039	2.12655	No	Antisense	AT2G47820	Non-overlapped	Promoter	0	3669	#N/A	#N/A	#N/A
AT1G19050	Chr1:6577833-6579178[-]	ARR7	response regulator 7	Chr1:6575973-6577802[-]	1830	0.0461326	0.101632	0.0229329	18.0508	12.0507	No	Antisense	AT1G19040	Non-overlapped	Promoter	0	519	#N/A	#N/A	#N/A
AT5G11810	Chr5:3808720-3810748[+]	#N/A	unknown protein; Has 1807 Blast hits to 1807 proteins in 277 species: Archae - 0; Bacteria - 0; Metazoa - 736; Fungi - 347; Plants - 385; Viruses - 0; Other Eukaryotes - 339 (source: NCBI BLink).	Chr5:3810749-3811328[+]	580	0.00909727	0.0400834	0	0.814926	2.10882	No	Antisense	AT5G11820	CDS	Promoter	100	528	#N/A	#N/A	#N/A
AT4G31750	Chr4:15364418-15367716[-]	WIN2	HOPW1-1-interacting 2	Chr4:15363348-15364417[-]	1070	0.0147937	0.0325912	0.0435796	0.406992	3.41949	No	Antisense	AT4G31740	Non-overlapped	Promoter	0	572	#N/A	#N/A	#N/A
AT5G47640	Chr5:19309227-19310272[+]	NF-YB2	nuclear factor Y, subunit B2	Chr5:19310273-19312492[+]	2220	0.0713029	0.209445	0.0987216	3.33477	16.382	No	Antisense	AT5G47650	3' UTR	Promoter	81	2247	#N/A	#N/A	#N/A
AT4G30100	Chr4:14714191-14720061[+]	#N/A	P-loop containing nucleoside triphosphate hydrolases superfamily protein	Chr4:14720062-14723311[+]	3250	0.0146116	0.0196717	0.0057391	1.69127	3.34833	No	Antisense	AT4G30110	Non-overlapped	CDS	0	3071	#N/A	#N/A	#N/A
AT1G68060	Chr1:25510941-25514500[-]	ATMAP70-1, MAP70-1	microtubule-associated proteins 70-1	Chr1:25508311-25510930[-]	2620	0.0080556	0.0199652	0.0177978	0.859451	1.82127	No	Antisense	AT1G68050	Non-overlapped	Promoter	0	2214	#N/A	#N/A	#N/A
AT1G69480	Chr1:26114112-26117797[-]	#N/A	EXS (ERD1/XPR1/SYG1) family protein	Chr1:26113244-26114101[-]	858	0.018449	0.433536	0.619562	1.10795	4.12368	No	Antisense	AT1G69470	Non-overlapped	Promoter	0	423	#N/A	#N/A	#N/A
AT4G24380	Chr4:12612535-12613719[+]	#N/A	INVOLVED IN: 10-formyltetrahydrofolate biosynthetic process, folic acid and derivative biosynthetic process; EXPRESSED IN: 24 plant structures; EXPRESSED DURING: 15 growth stages; CONTAINS InterPro DOMAIN/s: Serine hydrolase (InterPro:IPR005645); BEST Arabidopsis thaliana protein match is: alpha/beta-Hydrolases superfamily protein (TAIR:AT5G65400.1); Has 30201 Blast hits to 17322 proteins in 780 …	Chr4:12613720-12616349[+]	2630	0.0240749	0.0265191	0.0248222	1.95872	5.24943	No	Antisense	AT4G24390	3' UTR	Promoter	644	3042	#N/A	#N/A	#N/A
AT3G29010	Chr3:11006753-11007977[+]	#N/A	Biotin/lipoate A/B protein ligase family	Chr3:11008118-11009727[+]	1610	0.00327728	0.02527	0.0115851	0.303472	0.665145	Yes	Antisense	AT3G29020	Non-overlapped	Promoter	0	1339	#N/A	#N/A	#N/A
AT1G07480	Chr1:2296023-2299470[-]	#N/A	Transcription factor IIA, alpha/beta subunit	Chr1:2295490-2296022[-]	533	0.00989947	0.0109045	0.0349945	0.747292	1.98946	No	Antisense	AT1G07476	CDS	Promoter	475	747	#N/A	#N/A	#N/A
AT5G64400	Chr5:25748840-25750389[+]	#N/A	BEST Arabidopsis thaliana protein match is: Cox19-like CHCH family protein (TAIR:AT5G09570.1); Has 127 Blast hits to 125 proteins in 40 species: Archae - 0; Bacteria - 9; Metazoa - 16; Fungi - 2; Plants - 64; Viruses - 0; Other Eukaryotes - 36 (source: NCBI BLink).	Chr5:25750840-25752839[+]	2000	0.0237439	0.0261544	0.0163206	2.07385	4.74811	No	Antisense	AT5G64410	Non-overlapped	CDS	0	1995	#N/A	#N/A	#N/A
AT1G52230	Chr1:19454836-19455668[+]	PSAH2, PSAH-2, PSI-H	photosystem I subunit H2	Chr1:19456309-19457828[+]	1520	0.00347133	0.0267662	0.00920333	0.188672	0.694168	Yes	Antisense	AT1G52240	Non-overlapped	CDS	0	1520	#N/A	#N/A	#N/A
AT2G29420	Chr2:12617936-12618899[-]	ATGSTU7, GST25, GSTU7	glutathione S-transferase tau 7	Chr2:12616276-12617935[-]	1660	0.0127143	0.0490176	0.0393267	3.3944	2.50138	Yes	Antisense	AT2G29410	CDS	Promoter	52	1424	#N/A	#N/A	#N/A
AT5G57887	Chr5:23446721-23447249[+]	#N/A	unknown protein; FUNCTIONS IN: molecular_function unknown; INVOLVED IN: biological_process unknown; LOCATED IN: endomembrane system; Has 30201 Blast hits to 17322 proteins in 780 species: Archae - 12; Bacteria - 1396; Metazoa - 17338; Fungi - 3422; Plants - 5037; Viruses - 0; Other Eukaryotes - 2996 (source: NCBI BLink).	Chr5:23447410-23448619[+]	1210	0.0174427	0.0576406	0.0346836	0.610079	3.35356	No	Antisense	AT5G57890	Non-overlapped	CDS	0	1210	#N/A	#N/A	#N/A
AT4G27720	Chr4:13831038-13833814[+]	#N/A	Major facilitator superfamily protein	Chr4:13833815-13837044[+]	3230	0.0245035	0.0161947	0.0115493	2.08977	4.6416	No	Antisense	AT4G27730	3' UTR	Promoter	8	2772	#N/A	#N/A	#N/A
AT1G48598	Chr1:17965864-17969354[+]	CPuORF31	conserved peptide upstream open reading frame 31	Chr1:17969365-17970574[+]	1210	0.013082	0.0768541	0.0115612	1.14115	2.31669	No	Antisense	AT1G48605	Non-overlapped	Promoter	0	888	#N/A	#N/A	#N/A
AT4G28400	Chr4:14048292-14050335[+]	#N/A	Protein phosphatase 2C family protein	Chr4:14050336-14050985[+]	650	0.00837527	0	0.00740162	1.08744	1.46651	No	Antisense	AT4G28405	3' UTR	Promoter	202	668	#N/A	#N/A	#N/A
AT3G19290	Chr3:6687140-6690123[+]	ABF4	ABRE binding factor 4	Chr3:6690124-6693483[+]	3360	0.0125629	0.00691916	0.00416341	0.594299	2.10602	No	Antisense	AT3G19300	3' UTR	Promoter	6	3167	#N/A	#N/A	#N/A
AT1G01720	Chr1:268330-269819[+]	ATAF1, ANAC002	NAC (No Apical Meristem) domain transcriptional regulator superfamily protein	Chr1:269850-270519[+]	670	0.0639566	0.149705	0.105978	6.24416	10.6897	No	Antisense	AT1G01725	3' UTR	CDS	28	698	#N/A	#N/A	#N/A
AT4G14300	Chr4:8231017-8233491[+]	#N/A	RNA-binding (RRM/RBD/RNP motifs) family protein	Chr4:8233682-8234541[+]	860	0.00613537	0	0.00542211	0.216135	1.01326	No	Antisense	AT4G14301	Non-overlapped	Promoter	0	464	#N/A	#N/A	#N/A
AT1G29670	Chr1:10375763-10377871[+]	#N/A	GDSL-like Lipase/Acylhydrolase superfamily protein	Chr1:10377882-10379681[+]	1800	0.0439701	0.0419762	0.0388585	2.4754	7.16839	No	Antisense	AT1G29680	3' UTR	Promoter	82	1162	#N/A	#N/A	#N/A
AT5G15850	Chr5:5176091-5177897[-]	COL1, ATCOL1	CONSTANS-like 1	Chr5:5175121-5176010[-]	890	0.00703522	0.0619956	0	0.821397	1.14088	No	Antisense	AT5G15845	Other noncoding gene	Other noncoding gene	1799	2689	#N/A	#N/A	#N/A
AT1G20070	Chr1:6958010-6959123[-]	#N/A	unknown protein; FUNCTIONS IN: molecular_function unknown; INVOLVED IN: biological_process unknown; LOCATED IN: chloroplast; EXPRESSED IN: 20 plant structures; EXPRESSED DURING: 11 growth stages; Has 26 Blast hits to 26 proteins in 9 species: Archae - 0; Bacteria - 0; Metazoa - 0; Fungi - 2; Plants - 24; Viruses - 0; Other Eukaryotes - 0 (source: NCBI BLink).	Chr1:6957350-6958009[-]	660	0.00799457	0.132093	0.0211955	0.531076	1.28054	No	Antisense	AT1G20065	3' UTR	3' UTR	66	726	#N/A	#N/A	#N/A
AT3G49720	Chr3:18440003-18442198[-]	#N/A	unknown protein; FUNCTIONS IN: molecular_function unknown; INVOLVED IN: biological_process unknown; LOCATED IN: chloroplast thylakoid membrane, Golgi apparatus, plasma membrane, membrane; EXPRESSED IN: 25 plant structures; EXPRESSED DURING: 15 growth stages; BEST Arabidopsis thaliana protein match is: unknown protein (TAIR:AT5G65810.1); Has 64 Blast hits to 64 proteins in 11 species: Archae - 0; …	Chr3:18437493-18439952[-]	2460	0.0177359	0.0317467	0.023511	3.03025	2.79014	No	Antisense	AT3G49710	CDS	Promoter	8	2116	#N/A	#N/A	#N/A
AT5G02940	Chr5:684474-689702[-]	#N/A	Protein of unknown function (DUF1012)	Chr5:683794-684473[-]	680	0.00775944	0.0170944	0.0205721	0.913762	1.212	No	Antisense	AT5G02930	CDS	CDS	7	687	#N/A	#N/A	#N/A
AT5G06320	Chr5:1930793-1931768[-]	NHL3	NDR1/HIN1-like 3	Chr5:1930023-1930792[-]	770	0.00685249	0.0150963	0.0484469	0.655223	1.00898	No	Antisense	AT5G06310	CDS	CDS	159	929	#N/A	#N/A	#N/A
AT1G07470	Chr1:2291457-2294588[+]	#N/A	Transcription factor IIA, alpha/beta subunit	Chr1:2294599-2295498[+]	900	0.0175881	0.051663	0.0569925	0.690398	2.53139	No	Antisense	AT1G07473	3' UTR	Promoter	23	914	#N/A	#N/A	#N/A
AT5G67300	Chr5:26854022-26856006[+]	ATMYBR1, ATMYB44, MYBR1, MYB44	myb domain protein r1	Chr5:26856027-26857153[+]	1127	0.103	0.73747	0.579257	5.27306	13.9876	No	Antisense	AT5G67310	CDS	Promoter	791	1706	#N/A	#N/A	#N/A
AT2G15970	Chr2:6950041-6951192[+]	COR413-PM1, WCOR413, WCOR413-LIKE, ATCOR413-PM1, FL3-5A3, ATCYP19	cold regulated 413 plasma membrane 1	Chr2:6951233-6953191[+]	1959	0.070029	0.192846	0.190424	1.67808	9.50203	No	Antisense	AT2G15980	Non-overlapped	Promoter	0	1497	#N/A	#N/A	#N/A
AT1G73390	Chr1:27590810-27595142[-]	#N/A	Endosomal targeting BRO1-like domain-containing protein	Chr1:27588465-27590799[-]	2335	0.0474539	0.131923	0.171743	0.234265	6.36676	No	Antisense	AT1G73380	3' UTR	Promoter	13	1781	#N/A	#N/A	#N/A
AT2G39800	Chr2:16598072-16603319[-]	P5CS1, ATP5CS	delta1-pyrroline-5-carboxylate synthase 1	Chr2:16596722-16598061[-]	1340	0.063002	0.893501	3.03444	1.18898	8.40692	Yes	Antisense	AT2G39795	3' UTR	Promoter	91	1166	#N/A	#N/A	#N/A
AT4G34950	Chr4:16642316-16644818[-]	#N/A	Major facilitator superfamily protein	Chr4:16641466-16642305[-]	840	0.00628145	0.0691916	0.0388585	0.512109	0.837409	No	Antisense	AT4G34940	Non-overlapped	CDS	0	485	#N/A	#N/A	#N/A
AT2G29440	Chr2:12620060-12621148[-]	ATGSTU6, GST24, GSTU6	glutathione S-transferase tau 6	Chr2:12619580-12620059[-]	480	0.0109925	0.0121085	0.00971462	0.254474	1.45453	No	Antisense	AT2G29430	Non-overlapped	5' UTR	0	448	#N/A	#N/A	#N/A
AT3G52250	Chr3:19376138-19383100[+]	#N/A	Duplicated homeodomain-like superfamily protein	Chr3:19383371-19384920[+]	1550	0.0136166	0.0412471	0.0330924	0.596175	1.76787	No	Antisense	AT3G52260	Non-overlapped	CDS	0	1550	#N/A	#N/A	#N/A
AT4G15475	Chr4:8845875-8848869[+]	#N/A	F-box/RNI-like superfamily protein	Chr4:8848890-8850669[+]	1780	0.00889284	0.0522435	0.0550131	0.772745	1.14131	No	Antisense	AT4G15480	3' UTR	Promoter	69	1696	#N/A	#N/A	#N/A
AT1G32870	Chr1:11911679-11913947[+]	ANAC13, ANAC013, NAC13	NAC domain protein 13	Chr1:11913948-11914807[+]	860	0.0613537	1.23	0.607277	4.69323	7.6483	No	Antisense	AT1G32880	CDS	Promoter	20	808	#N/A	#N/A	#N/A
AT1G28540	Chr1:10035664-10036956[+]	#N/A	unknown protein; Has 25 Blast hits to 25 proteins in 10 species: Archae - 0; Bacteria - 0; Metazoa - 0; Fungi - 0; Plants - 25; Viruses - 0; Other Eukaryotes - 0 (source: NCBI BLink).	Chr1:10036967-10037796[+]	830	0.0127143	0.0350126	0.0561809	0.595061	1.56218	No	Antisense	AT1G28550	Non-overlapped	Promoter	0	732	#N/A	#N/A	#N/A
AT3G12120	Chr3:3860285-3863050[-]	FAD2	fatty acid desaturase 2	Chr3:3859655-3860284[-]	630	0.00837527	0.0461277	0.0370081	0.421489	1.00822	No	Antisense	AT3G12110	Non-overlapped	3' UTR	0	144	#N/A	#N/A	#N/A
AT5G42300	Chr5:16912333-16913930[-]	UBL5	ubiquitin-like protein 5	Chr5:16911443-16912282[-]	840	0.0188443	0.0691916	0.127678	1.53633	2.20601	No	Antisense	AT5G42290	Non-overlapped	Promoter	0	525	#N/A	#N/A	#N/A
AT5G60840	Chr5:24473319-24474491[-]	#N/A	unknown protein; Has 361 Blast hits to 333 proteins in 92 species: Archae - 2; Bacteria - 55; Metazoa - 145; Fungi - 36; Plants - 42; Viruses - 19; Other Eukaryotes - 62 (source: NCBI BLink).	Chr5:24472369-24473308[-]	940	0.0112264	0.0247323	0.014882	0.401132	1.30119	No	Antisense	AT5G60830	CDS	Promoter	1	671	#N/A	#N/A	#N/A
AT1G13740	Chr1:4713674-4715407[+]	AFP2	ABI five binding protein 2	Chr1:4715408-4718697[+]	3290	0.00962265	0.0211991	0.00850399	0.411624	1.1153	No	Antisense	AT1G13750	3' UTR	Promoter	14	2842	#N/A	#N/A	#N/A
AT1G51630	Chr1:19141973-19144294[-]	#N/A	O-fucosyltransferase family protein	Chr1:19140343-19141902[-]	1560	0.0135293	0.0335313	0.0149456	0.640014	1.56137	No	Antisense	AT1G51620	Non-overlapped	CDS	0	1445	#N/A	#N/A	#N/A
AT1G23820	Chr1:8420265-8422985[+]	SPDS1	spermidine synthase 1	Chr1:8422996-8425615[+]	2620	0.0181251	0.0199652	0.0106787	0.579724	2.0597	No	Antisense	AT1G23830	3' UTR	Promoter	26	1119	#N/A	#N/A	#N/A
AT4G21470	Chr4:11431105-11433322[+]	ATFMN/FHY, FMN/FHY	riboflavin kinase/FMN hydrolase	Chr4:11433323-11435282[+]	1960	0.0242284	0.145302	0.0666146	1.68806	2.73988	No	Antisense	AT4G21480	CDS	CDS	20	1980	#N/A	#N/A	#N/A
AT3G56260	Chr3:20867970-20869024[-]	#N/A	unknown protein; FUNCTIONS IN: molecular_function unknown; INVOLVED IN: biological_process unknown; LOCATED IN: cellular_component unknown; EXPRESSED IN: 8 plant structures; EXPRESSED DURING: F mature embryo stage, petal differentiation and expansion stage, E expanded cotyledon stage, D bilateral stage; BEST Arabidopsis thaliana protein match is: unknown protein (TAIR:AT2G40475.1).	Chr3:20867090-20867969[-]	880	0.0239837	0.138698	0.233151	0.343992	2.61875	No	Antisense	AT3G56250	Non-overlapped	CDS	0	751	#N/A	#N/A	#N/A
AT3G59940	Chr3:22142900-22144439[+]	#N/A	Galactose oxidase/kelch repeat superfamily protein	Chr3:22144490-22145139[+]	650	0.00811757	0.0178834	0.0143477	0.155237	0.880289	No	Antisense	AT3G59950	3' UTR	CDS	160	810	#N/A	#N/A	#N/A
AT5G46330	Chr5:18791736-18795546[+]	FLS2	Leucine-rich receptor-like protein kinase family protein	Chr5:18795587-18796266[+]	680	0.0245415	0.081099	0.0650654	1.71673	2.55147	No	Antisense	AT5G46340	Non-overlapped	3' UTR	0	341	#N/A	#N/A	#N/A
AT3G47295	Chr3:17427950-17428511[+]	#N/A	unknown protein; FUNCTIONS IN: molecular_function unknown; INVOLVED IN: biological_process unknown; LOCATED IN: endomembrane system; EXPRESSED IN: 22 plant structures; EXPRESSED DURING: 13 growth stages; Has 13 Blast hits to 13 proteins in 2 species: Archae - 0; Bacteria - 0; Metazoa - 0; Fungi - 0; Plants - 13; Viruses - 0; Other Eukaryotes - 0 (source: NCBI BLink).	Chr3:17428592-17430061[+]	1470	0.0143576	0.039538	0.0158606	0.415467	1.49269	No	Antisense	AT3G47300	3' UTR	Promoter	69	1101	#N/A	#N/A	#N/A
AT2G24550	Chr2:10427856-10429222[-]	#N/A	unknown protein; BEST Arabidopsis thaliana protein match is: unknown protein (TAIR:AT4G31510.1); Has 219 Blast hits to 219 proteins in 33 species: Archae - 0; Bacteria - 0; Metazoa - 16; Fungi - 2; Plants - 184; Viruses - 0; Other Eukaryotes - 17 (source: NCBI BLink).	Chr2:10427514-10427835[-]	322	0.0163864	0.01805	0.0144814	0.610242	1.63026	No	Antisense	AT2G24540	Non-overlapped	CDS	0	81	#N/A	#N/A	#N/A
AT5G45430	Chr5:18407336-18411977[+]	#N/A	Protein kinase superfamily protein	Chr5:18411998-18413707[+]	1710	0.0339419	0.0679777	0.0572651	1.91622	3.31543	No	Antisense	AT5G45440	Non-overlapped	Promoter	0	1248	#N/A	#N/A	#N/A
AT1G15690	Chr1:5398990-5402733[+]	AVP1, ATAVP3, AVP-3, AtVHP1;1	Inorganic H pyrophosphatase family protein	Chr1:5402744-5404033[+]	1290	0.0818049	0.054066	0.0506064	2.61833	7.95553	No	Antisense	AT1G15700	CDS	Promoter	165	1240	#N/A	#N/A	#N/A
AT1G31850	Chr1:11430222-11433699[+]	#N/A	S-adenosyl-L-methionine-dependent methyltransferases superfamily protein	Chr1:11433700-11434179[+]	480	0.0219851	0.0242171	0.0291439	0.387243	2.08884	No	Antisense	AT1G31860	Non-overlapped	3' UTR	0	72	#N/A	#N/A	#N/A
AT5G63790	Chr5:25526509-25528013[-]	ANAC102, NAC102	NAC domain containing protein 102	Chr5:25523699-25526508[-]	2810	0.0420584	0.0357991	0.0253425	4.5507	3.8667	Yes	Antisense	AT5G63780	3' UTR	Promoter	85	2749	#N/A	#N/A	#N/A
AT3G61490	Chr3:22758063-22760340[+]	#N/A	Pectin lyase-like superfamily protein	Chr3:22760341-22761080[+]	740	0.0142606	0.0314167	0.0189041	0.157887	1.30526	No	Antisense	AT3G61500	Non-overlapped	CDS	0	540	#N/A	#N/A	#N/A
AT5G55530	Chr5:22492940-22495956[+]	#N/A	Calcium-dependent lipid-binding (CaLB domain) family protein	Chr5:22495957-22500706[+]	4750	0.0710928	0.117465	0.0589013	0.945874	6.20317	No	Antisense	AT5G55540	Non-overlapped	Promoter	0	4348	#N/A	#N/A	#N/A
AT5G12140	Chr5:3922909-3924023[-]	ATCYS1, CYS1	cystatin-1	Chr5:3919309-3922908[-]	3600	0.0278478	0.195351	0.191702	1.20967	2.41036	No	Antisense	AT5G12130	Non-overlapped	Promoter	0	2892	#N/A	#N/A	#N/A
AT1G10090	Chr1:3290311-3296198[-]	#N/A	Early-responsive to dehydration stress protein (ERD4)	Chr1:3287831-3290280[-]	2450	0.0258437	0.0355842	0.0133229	0.678476	2.20905	No	Antisense	AT1G10070	3' UTR	Promoter	161	2355	#N/A	#N/A	#N/A
AT4G17090	Chr4:9604962-9607334[-]	CT-BMY, BAM3, BMY8	chloroplast beta-amylase	Chr4:9604192-9604961[-]	770	0.013705	0.0226445	0.00605587	0.49659	1.16578	No	Antisense	AT4G17085	3' UTR	Promoter	13	473	#N/A	#N/A	#N/A
AT1G77940	Chr1:29303897-29305382[-]	#N/A	Ribosomal protein L7Ae/L30e/S12e/Gadd45 family protein	Chr1:29303520-29303896[-]	377	0.0139958	0.0462501	0.0742125	0.493041	1.15571	No	Antisense	AT1G77930	Non-overlapped	3' UTR	0	51	#N/A	#N/A	#N/A
AT4G33300	Chr4:16050456-16056526[-]	ADR1-L1	ADR1-like 1	Chr4:16050026-16050455[-]	430	0.0122707	0.054066	0.0542211	0.703984	1.01326	No	Antisense	AT4G33290	CDS	CDS	410	840	#N/A	#N/A	#N/A
AT5G05270	Chr5:1563320-1565007[+]	#N/A	Chalcone-flavanone isomerase family protein	Chr5:1565028-1566297[+]	1270	0.012464	0.0228823	0.0367167	0.096179	1.01682	Yes	Antisense	AT5G05280	Non-overlapped	5' UTR	0	851	#N/A	#N/A	#N/A
AT5G61500	Chr5:24733785-24736853[-]	ATATG3, ATG3	autophagy 3 (APG3)	Chr5:24733486-24733784[-]	299	0.0176469	0	0	0.657184	1.40453	No	Antisense	AT5G61490	Non-overlapped	CDS	0	181	#N/A	#N/A	#N/A
AT3G57330	Chr3:21211456-21216375[-]	ACA11	autoinhibited Ca2+-ATPase 11	Chr3:21209716-21211435[-]	1720	0.0124151	0.0205133	0.0109718	1.06215	0.988128	No	Antisense	AT3G57320	Non-overlapped	Promoter	0	907	#N/A	#N/A	#N/A
AT1G06460	Chr1:1967087-1969561[-]	ACD32.1, ACD31.2	alpha-crystallin domain 32.1	Chr1:1965657-1967086[-]	1430	0.199249	1.03642	1.76738	8.72747	15.7813	No	Antisense	AT1G06450	3' UTR	Promoter	133	1380	#N/A	#N/A	#N/A
AT3G50950	Chr3:18935674-18938799[+]	ZAR1	HOPZ-ACTIVATED RESISTANCE 1	Chr3:18938840-18940579[+]	1740	0.011388	0.00418136	0.0100641	1.0889	0.898823	No	Antisense	AT3G50960	3' UTR	Promoter	103	1692	#N/A	#N/A	#N/A
AT4G29590	Chr4:14512549-14514492[-]	#N/A	S-adenosyl-L-methionine-dependent methyltransferases superfamily protein	Chr4:14511579-14512128[-]	550	0.0099555	0.109662	0.061587	0.581177	0.782462	No	Antisense	AT4G29580	Non-overlapped	CDS	0	550	#N/A	#N/A	#N/A
AT1G79710	Chr1:29995116-29998058[+]	#N/A	Major facilitator superfamily protein	Chr1:29998639-29999378[+]	740	0.00713029	0.0471251	0.0252055	0.789437	0.553318	No	Antisense	AT1G79720	CDS	Promoter	932	1339	#N/A	#N/A	#N/A
AT2G31090	Chr2:13256138-13256711[+]	#N/A	unknown protein; FUNCTIONS IN: molecular_function unknown; INVOLVED IN: biological_process unknown; LOCATED IN: endomembrane system; EXPRESSED IN: 24 plant structures; EXPRESSED DURING: 13 growth stages; BEST Arabidopsis thaliana protein match is: unknown protein (TAIR:AT2G20562.1); Has 70 Blast hits to 70 proteins in 13 species: Archae - 0; Bacteria - 0; Metazoa - 0; Fungi - 0; Plants - 70; Viru…	Chr2:13256752-13258371[+]	1620	0.0134431	0.0518276	0.0356409	1.10613	1.03986	Yes	Antisense	AT2G31100	Non-overlapped	Promoter	0	1425	#N/A	#N/A	#N/A
AT3G46660	Chr3:17189264-17191167[-]	UGT76E12	UDP-glucosyl transferase 76E12	Chr3:17188664-17189243[-]	580	0.0181945	0.0901876	0.297468	0.576858	1.40286	No	Antisense	AT3G46658	Other noncoding gene	Other noncoding gene	1904	2278	#N/A	#N/A	#N/A
AT3G55830	Chr3:20714946-20717443[+]	EPC1	Nucleotide-diphospho-sugar transferases superfamily protein	Chr3:20717474-20719153[+]	1680	0.0254285	0.0245088	0.0196633	1.16133	1.93217	Yes	Antisense	AT3G55840	3' UTR	Promoter	449	1842	#N/A	#N/A	#N/A
AT1G73030	Chr1:27473826-27475122[+]	VPS46.2, CHMP1A	SNF7 family protein	Chr1:27475133-27476312[+]	1180	0.0178862	0.0738825	0.0237103	0.679597	1.3524	No	Antisense	AT1G73040	3' UTR	Promoter	63	893	#N/A	#N/A	#N/A
AT5G52580	Chr5:21337861-21342985[+]	#N/A	RabGAP/TBC domain-containing protein	Chr5:21342986-21343375[+]	390	0.0135293	0.10432	0.0956517	0.585545	1.02297	No	Antisense	AT5G52600	Non-overlapped	CDS	0	274	#N/A	#N/A	#N/A
AT5G03030	Chr5:708318-709703[-]	#N/A	Chaperone DnaJ-domain superfamily protein	Chr5:707188-708317[-]	1130	0.0326858	0.00514344	0.0206328	0.606272	2.45748	Yes	Antisense	AT5G03020	3' UTR	Promoter	79	1140	#N/A	#N/A	#N/A
AT1G74790	Chr1:28098765-28101896[+]	#N/A	catalytics	Chr1:28101917-28105316[+]	3400	0.0263821	0.0615398	0.0493731	0.790365	1.92685	No	Antisense	AT1G74800	Non-overlapped	Promoter	0	3145	#N/A	#N/A	#N/A
AT5G63290	Chr5:25369245-25370921[-]	#N/A	Radical SAM superfamily protein	Chr5:25368485-25369244[-]	760	0.0138853	0.0688274	0.0245422	0.335416	1.00844	No	Antisense	AT5G63280	3' UTR	CDS	53	813	#N/A	#N/A	#N/A
AT4G27470	Chr4:13734999-13736518[+]	ATRMA3, RMA3	RING membrane-anchor 3	Chr4:13736619-13737558[+]	940	0.0112264	0.00618308	0.00992132	0.22599	0.809752	No	Antisense	AT4G27480	Non-overlapped	CDS	0	724	#N/A	#N/A	#N/A
AT3G24590	Chr3:8970672-8972168[+]	PLSP1	plastidic type i signal peptidase 1	Chr3:8972169-8973328[+]	1160	0.0227432	0.0801668	0.0120595	0.595171	1.62461	No	Antisense	AT3G24600	Non-overlapped	CDS	0	1134	#N/A	#N/A	#N/A
AT3G54990	Chr3:20373718-20376522[-]	SMZ	Integrase-type DNA-binding superfamily protein	Chr3:20372948-20373627[-]	680	0.00775944	0.0683776	0.054859	0.210868	0.548102	No	Antisense	AT3G54980	Non-overlapped	3' UTR	0	122	#N/A	#N/A	#N/A
AT2G21330	Chr2:9128147-9130240[-]	FBA1	fructose-bisphosphate aldolase 1	Chr2:9127787-9128146[-]	360	0.0146567	0.0807235	0.0129528	0.486819	1.02072	No	Antisense	AT2G21320	Non-overlapped	3' UTR	0	57	#N/A	#N/A	#N/A
AT3G16370	Chr3:5556710-5558589[+]	#N/A	GDSL-like Lipase/Acylhydrolase superfamily protein	Chr3:5558610-5561479[+]	2870	0.0147078	0.0546782	0.0731135	0.438554	1.02245	No	Antisense	AT3G16380	Non-overlapped	Promoter	0	2318	#N/A	#N/A	#N/A
AT4G14400	Chr4:8294446-8298602[+]	ACD6	ankyrin repeat family protein	Chr4:8298603-8299192[+]	590	0.0178862	0.059106	0.00790342	1.08015	1.23673	No	Antisense	AT4G14403	Non-overlapped	Promoter	0	93	#N/A	#N/A	#N/A
AT3G02020	Chr3:340546-343835[-]	AK3	aspartate kinase 3	Chr3:337826-340525[-]	2700	0.0357051	0.102695	0.0245422	1.21588	2.46486	No	Antisense	AT3G02010	Non-overlapped	Promoter	0	2478	#N/A	#N/A	#N/A
AT2G24230	Chr2:10301817-10304812[-]	#N/A	Leucine-rich repeat protein kinase family protein	Chr2:10300737-10301816[-]	1080	0.0146567	0.0161447	0.00863522	0.255703	1.00128	No	Antisense	AT2G24220	Non-overlapped	CDS	0	1051	#N/A	#N/A	#N/A
AT5G63310	Chr5:25371904-25373861[-]	NDPK2, NDPK1A, NDPK IA IA, NDPK IA, ATNDPK2	nucleoside diphosphate kinase 2	Chr5:25370922-25371873[-]	952	0.0942217	0.164839	0.0930644	3.12955	6.29711	No	Antisense	AT5G63300	3' UTR	Promoter	114	880	#N/A	#N/A	#N/A
AT1G67850	Chr1:25437900-25442142[+]	#N/A	Protein of unknown function (DUF707)	Chr1:25442163-25442403[+]	241	0.0875754	0.168816	0.193486	2.24771	5.77219	No	Antisense	AT1G67855	Non-overlapped	CDS	0	148	#N/A	#N/A	#N/A
AT4G38840	Chr4:18124978-18125559[-]	#N/A	SAUR-like auxin-responsive protein family	Chr4:18123238-18124967[-]	1730	0.0164888	0.0181628	0.0109289	1.79653	1.05809	No	Antisense	AT4G38830	Non-overlapped	CDS	0	1706	#N/A	#N/A	#N/A
AT5G21940	Chr5:7249268-7250539[-]	#N/A	unknown protein; BEST Arabidopsis thaliana protein match is: unknown protein (TAIR:AT3G43850.1); Has 30201 Blast hits to 17322 proteins in 780 species: Archae - 12; Bacteria - 1396; Metazoa - 17338; Fungi - 3422; Plants - 5037; Viruses - 0; Other Eukaryotes - 2996 (source: NCBI BLink).	Chr5:7248628-7249177[-]	550	0.00959349	0	0.00847822	0.0869033	0.610843	No	Antisense	AT5G21930	Non-overlapped	CDS	0	543	#N/A	#N/A	#N/A
AT5G62790	Chr5:25214125-25217439[-]	DXR	1-deoxy-D-xylulose 5-phosphate reductoisomerase	Chr5:25212995-25214124[-]	1130	0.0186776	0.0154303	0.028886	0.328985	1.18461	No	Antisense	AT5G62780	CDS	Promoter	13	752	#N/A	#N/A	#N/A
AT1G49720	Chr1:18400092-18402628[+]	ABF1	abscisic acid responsive element-binding factor 1	Chr1:18402639-18405928[+]	3290	0.0449057	0.0441648	0.0425199	1.05569	2.83693	No	Antisense	AT1G49730	CDS	Promoter	123	3166	#N/A	#N/A	#N/A
AT1G50000	Chr1:18515059-18517249[-]	#N/A	methyltransferases	Chr1:18513719-18515018[-]	1300	0.0162351	0.0581209	0.0143477	0.866062	1.00143	No	Antisense	AT1G49990	3' UTR	CDS	41	1341	#N/A	#N/A	#N/A
AT5G02020	Chr5:386018-388123[-]	SIS	Encodes a protein involved in salt tolerance, names SIS (Salt Induced Serine rich).	Chr5:383078-385977[-]	2900	0.0345696	0.0180375	0.0176873	0.106215	2.10158	No	Antisense	AT5G02010	Non-overlapped	Promoter	0	2698	#N/A	#N/A	#N/A
AT3G15190	Chr3:5116141-5117615[+]	#N/A	chloroplast 30S ribosomal protein S20, putative	Chr3:5117686-5119085[+]	1400	0.0150755	0.0415149	0.036638	0.682811	0.914901	No	Antisense	AT3G15200	CDS	Promoter	127	1502	#N/A	#N/A	#N/A
AT1G69260	Chr1:26039048-26040720[+]	AFP1	ABI five binding protein	Chr1:26040721-26042740[+]	2020	0.0261209	0.0920727	0.0969539	0.412767	1.56443	Yes	Antisense	AT1G69270	3' UTR	Promoter	32	2014	#N/A	#N/A	#N/A
AT5G17530	Chr5:5777595-5782150[+]	#N/A	phosphoglucosamine mutase family protein	Chr5:5783141-5783770[+]	630	0.00837527	0.0369022	0.00740162	0.303472	0.499946	No	Antisense	AT5G17540	CDS	Promoter	164	730	#N/A	#N/A	#N/A
AT5G10550	Chr5:3332855-3335232[-]	GTE2	global transcription factor group E2	Chr5:3328995-3332574[-]	3580	0.02075	0.0244892	0.0196475	0.845842	1.22683	No	Antisense	AT5G10540	3' UTR	CDS	2117	5697	#N/A	#N/A	#N/A
AT2G20890	Chr2:8987666-8989416[+]	PSB29, THF1	photosystem II reaction center PSB29 protein	Chr2:8989417-8990886[+]	1470	0.017947	0.0237228	0.0190327	0.177025	1.0606	No	Antisense	AT2G20900	CDS	CDS	142	1612	#N/A	#N/A	#N/A
AT5G20250	Chr5:6833659-6836782[+]	DIN10	Raffinose synthase family protein	Chr5:6836793-6838122[+]	1330	0.0389244	0.014292	0.0114664	2.26795	2.28479	No	Antisense	AT5G20260	Non-overlapped	CDS	0	1317	#N/A	#N/A	#N/A
AT1G06650	Chr1:2035839-2037366[+]	#N/A	2-oxoglutarate (2OG) and Fe(II)-dependent oxygenase superfamily protein	Chr1:2037387-2037716[+]	330	0.0159891	0.0352248	0.0706518	0.305771	0.922627	No	Antisense	AT1G06660	3' UTR	CDS	56	386	#N/A	#N/A	#N/A
AT5G43060	Chr5:17269507-17272164[-]	#N/A	Granulin repeat cysteine protease family protein	Chr5:17267937-17269506[-]	1570	0.0470509	0.0185098	0.0504913	1.45454	2.69159	Yes	Antisense	AT5G43050	Non-overlapped	Promoter	0	1000	#N/A	#N/A	#N/A
AT1G48920	Chr1:18098095-18101623[+]	ATNUC-L1, PARL1, NUC-L1	nucleolin like 1	Chr1:18101694-18104993[+]	3300	0.0207859	0.044031	0.0127173	0.603495	1.18033	No	Antisense	AT1G48930	Non-overlapped	Promoter	0	2968	#N/A	#N/A	#N/A
AT1G06570	Chr1:2011885-2013545[-]	PDS1, HPD	phytoene desaturation 1	Chr1:2010305-2011874[-]	1570	0.030247	0.1888	0.109893	0.578433	1.68851	Yes	Antisense	AT1G06560	3' UTR	CDS	122	1692	#N/A	#N/A	#N/A
AT5G17460	Chr5:5757098-5759795[-]	#N/A	unknown protein; FUNCTIONS IN: molecular_function unknown; INVOLVED IN: response to salt stress.	Chr5:5756388-5757097[-]	710	0.0445894	0.0900465	0.0788116	0.478716	2.46945	No	Antisense	AT5G17450	Non-overlapped	CDS	0	501	#N/A	#N/A	#N/A
AT3G12740	Chr3:4049515-4051775[+]	ALIS1	ALA-interacting subunit 1	Chr3:4051776-4053535[+]	1760	0.0329776	0.0594418	0.0582877	1.81954	1.81046	No	Antisense	AT3G12750	3' UTR	Promoter	125	1551	#N/A	#N/A	#N/A
AT3G62980	Chr3:23273116-23276375[-]	TIR1	F-box/RNI-like superfamily protein	Chr3:23272216-23273115[-]	900	0.0351761	0.0387473	0.0155434	0.224232	1.93062	No	Antisense	AT3G62970	Non-overlapped	CDS	0	708	#N/A	#N/A	#N/A
AT5G02290	Chr5:470182-472784[-]	NAK	Protein kinase superfamily protein	Chr5:469111-470181[-]	1071	0.0197065	0.0542679	0.0609545	1.10083	1.07341	No	Antisense	AT5G02280	3' UTR	Promoter	104	988	#N/A	#N/A	#N/A
AT1G73920	Chr1:27790875-27794914[+]	#N/A	alpha/beta-Hydrolases superfamily protein	Chr1:27794925-27798024[+]	3100	0.023829	0.028123	0.0180504	0.30494	1.24462	No	Antisense	AT1G73930	Non-overlapped	Promoter	0	2862	#N/A	#N/A	#N/A
AT1G43890	Chr1:16646732-16648648[+]	ATRAB18, ATRABC1, RAB18-1, RABC1, ATRAB-C1, RAB18	RAB GTPASE HOMOLOG B18	Chr1:16648649-16649198[+]	550	0.019187	0.0317023	0.0423911	0.299334	1.00216	No	Antisense	AT1G43895	Other noncoding gene	Other noncoding gene	82	632	#N/A	#N/A	#N/A
AT1G27950	Chr1:9740704-9742159[+]	LTPG1	glycosylphosphatidylinositol-anchored lipid protein transfer 1	Chr1:9742160-9742429[+]	270	0.0195423	0.215263	0.138164	0.35405	1.011	No	Antisense	AT1G27960	Non-overlapped	CDS	0	242	#N/A	#N/A	#N/A
AT3G08950	Chr3:2727215-2729601[+]	HCC1	electron transport SCO1/SenC family protein	Chr3:2729602-2729871[+]	270	0.0195423	0.0645788	0.0690818	0.550745	1.011	No	Antisense	AT3G08960	Non-overlapped	3' UTR	0	53	#N/A	#N/A	#N/A
AT1G50280	Chr1:18623698-18626395[-]	#N/A	Phototropic-responsive NPH3 family protein	Chr1:18621740-18623287[-]	1548	0.0818049	0.364194	0.126516	0.548915	4.20836	No	Antisense	AT1G50270	CDS	Promoter	553	1815	#N/A	#N/A	#N/A
AT3G48140	Chr3:17778356-17779549[+]	#N/A	B12D protein	Chr3:17779670-17781639[+]	1970	0.0267838	0.0354036	0.0118351	1.07024	1.37498	No	Antisense	AT3G48150	Non-overlapped	CDS	0	1970	#N/A	#N/A	#N/A
AT1G76460	Chr1:28686181-28689121[-]	#N/A	RNA-binding (RRM/RBD/RNP motifs) family protein	Chr1:28685251-28686120[-]	870	0.0181945	0.0668057	0.0375185	0.640953	0.905074	No	Antisense	AT1G76450	3' UTR	CDS	64	934	#N/A	#N/A	#N/A
AT4G28080	Chr4:13948603-13957840[-]	#N/A	Tetratricopeptide repeat (TPR)-like superfamily protein	Chr4:13946683-13948522[-]	1840	0.037279	0.0442224	0.0126712	0.793727	1.85156	No	Antisense	AT4G28070	3' UTR	CDS	25	1865	#N/A	#N/A	#N/A
AT5G66190	Chr5:26450964-26453199[-]	ATLFNR1, FNR1	ferredoxin-NADP(+)-oxidoreductase 1	Chr5:26448694-26450943[-]	2250	0.030486	0.0232484	0.0124347	0.689218	1.51417	No	Antisense	AT5G66180	3' UTR	Promoter	191	2197	#N/A	#N/A	#N/A
AT2G17820	Chr2:7742924-7748220[-]	ATHK1, AHK1, HK1	histidine kinase 1	Chr2:7742404-7742923[-]	520	0.0304409	0.0447084	0.0179347	0.949808	1.48397	No	Antisense	AT2G17810	Non-overlapped	Other noncoding gene	0	74	#N/A	#N/A	#N/A
AT3G15353	Chr3:5180642-5181586[-]	MT3, ATMT3	metallothionein 3	Chr3:5178872-5180271[-]	1400	0.00753774	0.033212	0.00333073	0.0948349	0.36371	No	Antisense	AT3G15352	3' UTR	Promoter	24	883	#N/A	#N/A	#N/A
AT1G80840	Chr1:30383691-30385499[+]	WRKY40, ATWRKY40	WRKY DNA-binding protein 40	Chr1:30385500-30385999[+]	500	0.0211057	0.0116242	0	0.509833	1.00789	No	Antisense	AT1G80850	3' UTR	CDS	51	551	#N/A	#N/A	#N/A
AT1G18870	Chr1:6515429-6519282[+]	ICS2, ATICS2	isochorismate synthase 2	Chr1:6519283-6519532[+]	250	0.0211057	0.13949	0.876647	0.127458	1.00789	No	Antisense	AT1G18871	Non-overlapped	Promoter	0	177	#N/A	#N/A	#N/A
AT2G37340	Chr2:15670147-15672700[-]	RSZ33, ATRSZ33, RS2Z33, AT-RS2Z33	arginine/serine-rich zinc knuckle-containing protein 33	Chr2:15668987-15670136[-]	1150	0.0275291	0.035378	0.0040548	0.586492	1.30095	No	Antisense	AT2G37330	CDS	Promoter	41	1040	#N/A	#N/A	#N/A
AT4G16490	Chr4:9293543-9295625[-]	#N/A	ARM repeat superfamily protein	Chr4:9291073-9293522[-]	2450	0.786079	0.676101	0.395881	10.7646	37.1124	No	Antisense	AT4G16480	Non-overlapped	Promoter	0	2085	#N/A	#N/A	#N/A
AT5G40850	Chr5:16366353-16369099[+]	UPM1	urophorphyrin methylase 1	Chr5:16369120-16369419[+]	300	0.105528	0.0774946	0.0466302	2.76159	4.96946	No	Antisense	AT5G40855	Non-overlapped	Promoter	0	231	#N/A	#N/A	#N/A
AT4G30660	Chr4:14955373-14956171[+]	#N/A	Low temperature and salt responsive protein family	Chr4:14956172-14957201[+]	1030	0.0409819	0.118499	0.0995985	0.716694	1.9163	No	Antisense	AT4G30662	3' UTR	Promoter	263	882	#N/A	#N/A	#N/A
AT3G05020	Chr3:1391632-1392954[-]	ACP1, ACP	acyl carrier protein 1	Chr3:1391072-1391611[-]	540	0.0195423	0.0430525	0.0431761	0.295042	0.894347	No	Antisense	AT3G05010	3' UTR	CDS	44	584	#N/A	#N/A	#N/A
AT1G28100	Chr1:9801082-9804394[+]	#N/A	unknown protein; FUNCTIONS IN: molecular_function unknown; INVOLVED IN: biological_process unknown; LOCATED IN: cellular_component unknown; EXPRESSED IN: 22 plant structures; EXPRESSED DURING: 13 growth stages; Has 64 Blast hits to 64 proteins in 27 species: Archae - 0; Bacteria - 14; Metazoa - 0; Fungi - 6; Plants - 42; Viruses - 0; Other Eukaryotes - 2 (source: NCBI BLink).	Chr1:9804535-9805044[+]	510	0.0112264	0	0.0297639	0.553675	0.513774	No	Antisense	AT1G28110	CDS	CDS	754	1264	#N/A	#N/A	#N/A
AT2G34660	Chr2:14602470-14612565[+]	ATMRP2, EST4, MRP2, ABCC2, AtABCC2	multidrug resistance-associated protein 2	Chr2:14612566-14613265[+]	700	0.0226132	0.0581209	0.0799375	0.447621	1.01239	No	Antisense	AT2G34670	Non-overlapped	CDS	0	685	#N/A	#N/A	#N/A
AT5G61590	Chr5:24764438-24765324[-]	#N/A	Integrase-type DNA-binding superfamily protein	Chr5:24763948-24764387[-]	440	0.0239837	0	0.0211955	0.337957	1.06182	No	Antisense	AT5G61580	Non-overlapped	3' UTR	0	67	#N/A	#N/A	#N/A
AT4G24570	Chr4:12686459-12687650[+]	DIC2	dicarboxylate carrier 2	Chr4:12687671-12691160[+]	3490	0.0255685	0.0102416	0.0164335	1.88099	1.11926	No	Antisense	AT4G24580	Non-overlapped	CDS	0	3282	#N/A	#N/A	#N/A
AT4G09560	Chr4:6041342-6043840[-]	#N/A	Protease-associated (PA) RING/U-box zinc finger family protein	Chr4:6040152-6041311[-]	1160	0.0454864	0.0701459	0.0683373	0.846974	1.94591	No	Antisense	AT4G09550	Non-overlapped	3' UTR	0	64	#N/A	#N/A	#N/A
AT1G79530	Chr1:29915902-29919234[-]	GAPCP-1	glyceraldehyde-3-phosphate dehydrogenase of plastid 1	Chr1:29915442-29915891[-]	450	0.0234507	0.116242	0.113985	0.342249	0.991559	No	Antisense	AT1G79529	Other noncoding gene	Other noncoding gene	509	739	#N/A	#N/A	#N/A
AT5G58300	Chr5:23571879-23575084[+]	#N/A	Leucine-rich repeat protein kinase family protein	Chr5:23575085-23576384[+]	1300	0.0730581	0.2146	0.125543	1.28684	3.08101	No	Antisense	AT5G58310	3' UTR	Promoter	93	1093	#N/A	#N/A	#N/A
AT5G66070	Chr5:26421855-26423240[+]	#N/A	RING/U-box superfamily protein	Chr5:26423261-26423860[+]	600	0.0175881	0.0193736	0.0310868	0.389455	0.73492	No	Antisense	AT5G66080	Non-overlapped	CDS	0	442	#N/A	#N/A	#N/A
AT2G18700	Chr2:8109043-8112010[+]	ATTPS11, TPS11, ATTPSB	trehalose phosphatase/synthase 11	Chr2:8112031-8114680[+]	2650	0.119466	0.0614108	0.0369522	0.992009	4.95031	Yes	Antisense	AT2G18710	Non-overlapped	Promoter	0	2402	#N/A	#N/A	#N/A
AT5G42980	Chr5:17242607-17243912[+]	ATTRX3, ATH3, ATTRXH3, TRXH3, TRX3	thioredoxin 3	Chr5:17243983-17244712[+]	730	0.0289119	0.0318471	0.0063877	0.45105	1.19371	No	Antisense	AT5G42990	Non-overlapped	CDS	0	726	#N/A	#N/A	#N/A
AT1G65960	Chr1:24552003-24557730[+]	GAD2	glutamate decarboxylase 2	Chr1:24557731-24558390[+]	660	0.0639566	0.0616434	0.00706518	0.885126	2.60881	No	Antisense	AT1G65970	CDS	Promoter	359	951	#N/A	#N/A	#N/A
AT3G55610	Chr3:20624020-20629093[-]	P5CS2	delta 1-pyrroline-5-carboxylate synthase 2	Chr3:20622480-20624019[-]	1540	0.0342625	0.0717076	0.172592	0.406928	1.39417	No	Antisense	AT3G55605	Non-overlapped	Promoter	0	1383	#N/A	#N/A	#N/A
AT3G11820	Chr3:3729305-3731149[-]	SYP121, AT-SYR1, ATSYP121, SYR1, ATSYR1, PEN1	syntaxin of plants 121	Chr3:3727195-3729284[-]	2090	0.236529	0.347389	0.557418	6.02801	9.5787	Yes	Antisense	AT3G11810	Non-overlapped	Promoter	0	1236	#N/A	#N/A	#N/A
AT3G07790	Chr3:2487369-2489220[+]	#N/A	DGCR14-related	Chr3:2489261-2490740[+]	1480	0.0213909	0.0235625	0.0189041	0.796613	0.8619	No	Antisense	AT3G07800	Non-overlapped	CDS	0	1354	#N/A	#N/A	#N/A
AT2G22880	Chr2:9741119-9741463[-]	#N/A	VQ motif-containing protein	Chr2:9740369-9740738[-]	370	0.0142606	0.0314167	0.0126028	0.473662	0.567506	No	Antisense	AT2G22870	Non-overlapped	CDS	0	370	#N/A	#N/A	#N/A
AT5G65280	Chr5:26085973-26088153[-]	GCL1	GCR2-like 1	Chr5:26085443-26085972[-]	530	0.0336793	0.148394	0.178584	1.10735	1.32911	No	Antisense	AT5G65274	Non-overlapped	CDS	0	518	#N/A	#N/A	#N/A
AT4G01540	Chr4:670483-672789[-]	ANAC068, NTM1	NAC with transmembrane motif1	Chr4:669074-670012[-]	939	0.0449535	0.284724	0.20857	0.831396	1.76658	No	Antisense	AT4G01535	Non-overlapped	Promoter	0	492	#N/A	#N/A	#N/A
AT2G31380	Chr2:13381910-13383470[+]	STH	salt tolerance homologue	Chr2:13383521-13384580[+]	1060	0.0248888	0.0603142	0.00439907	1.1373	0.975601	No	Antisense	AT2G31390	3' UTR	CDS	48	1108	#N/A	#N/A	#N/A
AT2G01630	Chr2:279282-282123[-]	#N/A	O-Glycosyl hydrolases family 17 protein	Chr2:277962-279271[-]	1310	0.0362502	0.0488038	0.0177978	0.470265	1.41855	Yes	Antisense	AT2G01620	3' UTR	Promoter	15	1160	#N/A	#N/A	#N/A
AT4G13590	Chr4:7901216-7904025[-]	#N/A	Uncharacterized protein family (UPF0016)	Chr4:7900176-7901095[-]	920	0.115965	0.236316	0.153726	1.98424	4.52835	No	Antisense	AT4G13580	3' UTR	Promoter	113	835	#N/A	#N/A	#N/A
AT5G48530	Chr5:19666837-19668830[-]	#N/A	unknown protein; FUNCTIONS IN: molecular_function unknown; INVOLVED IN: biological_process unknown; LOCATED IN: mitochondrion; BEST Arabidopsis thaliana protein match is: unknown protein (TAIR:AT3G07440.1); Has 32 Blast hits to 32 proteins in 11 species: Archae - 0; Bacteria - 0; Metazoa - 0; Fungi - 0; Plants - 32; Viruses - 0; Other Eukaryotes - 0 (source: NCBI BLink).	Chr5:19665927-19666826[-]	900	0.0293134	0.0645788	0.0362679	1.18607	1.14321	No	Antisense	AT5G48520	Non-overlapped	CDS	0	510	#N/A	#N/A	#N/A
AT3G57070	Chr3:21123924-21125647[+]	#N/A	Glutaredoxin family protein	Chr3:21125648-21125856[+]	209	0.12623	0.3059	0.267733	1.77872	4.89779	No	Antisense	AT3G57072	Non-overlapped	Promoter	0	138	#N/A	#N/A	#N/A
AT5G08280	Chr5:2663499-2665792[-]	HEMC	hydroxymethylbilane synthase	Chr5:2662209-2663498[-]	1290	0.0368122	0.0225275	0.014459	0.547543	1.42833	No	Antisense	AT5G08270	3' UTR	CDS	129	1419	#N/A	#N/A	#N/A
AT3G52220	Chr3:19369362-19371074[-]	#N/A	CONTAINS InterPro DOMAIN/s: Kinase phosphorylation domain (InterPro:IPR019315); Has 8882 Blast hits to 4920 proteins in 346 species: Archae - 10; Bacteria - 184; Metazoa - 3955; Fungi - 1221; Plants - 712; Viruses - 24; Other Eukaryotes - 2776 (source: NCBI BLink).	Chr3:19368262-19369271[-]	1010	0.0208967	0.00575455	0.00461685	0.467977	0.810803	No	Antisense	AT3G52210	3' UTR	CDS	133	1143	#N/A	#N/A	#N/A
AT1G13940	Chr1:4762703-4766749[-]	#N/A	Plant protein of unknown function (DUF863)	Chr1:4761893-4762522[-]	630	0.0586269	0.267541	0.340474	1.00314	2.26642	Yes	Antisense	AT1G13930	Non-overlapped	3' UTR	0	630	#N/A	#N/A	#N/A
AT5G06280	Chr5:1917641-1918896[-]	#N/A	unknown protein; BEST Arabidopsis thaliana protein match is: unknown protein (TAIR:AT3G52520.1); Has 1807 Blast hits to 1807 proteins in 277 species: Archae - 0; Bacteria - 0; Metazoa - 736; Fungi - 347; Plants - 385; Viruses - 0; Other Eukaryotes - 339 (source: NCBI BLink).	Chr5:1917201-1917610[-]	410	0.0257386	0.085055	0.0568661	0.738325	0.973065	No	Antisense	AT5G06278	Other noncoding gene	Other noncoding gene	472	872	#N/A	#N/A	#N/A
AT2G47780	Chr2:19570049-19571034[+]	#N/A	Rubber elongation factor protein (REF)	Chr2:19571035-19572234[+]	1200	0.0395731	0.0581209	0.0310868	0.185876	1.45672	No	Antisense	AT2G47790	3' UTR	CDS	71	1271	#N/A	#N/A	#N/A
AT3G55520	Chr3:20593661-20595345[+]	#N/A	FKBP-like peptidyl-prolyl cis-trans isomerase family protein	Chr3:20595356-20595745[+]	390	0.0270586	0.0298056	0	0.381285	0.996046	No	Antisense	AT3G55530	CDS	CDS	220	610	#N/A	#N/A	#N/A
AT5G61020	Chr5:24557201-24559879[-]	ECT3	evolutionarily conserved C-terminal region 3	Chr5:24556321-24557170[-]	850	0.0248302	0.0752153	0.0274295	0.643539	0.914018	Yes	Antisense	AT5G61010	Non-overlapped	CDS	0	429	#N/A	#N/A	#N/A
AT1G42990	Chr1:16135852-16137463[-]	ATBZIP60, BZIP60	basic region/leucine zipper motif 60	Chr1:16133242-16135841[-]	2600	0.0629111	0.301782	0.195488	2.03034	2.30773	No	Antisense	AT1G42980	Non-overlapped	Promoter	0	2302	#N/A	#N/A	#N/A
AT1G71410	Chr1:26912726-26917712[-]	#N/A	ARM repeat superfamily protein	Chr1:26910776-26912555[-]	1780	0.0237142	0.0457131	0.0288164	0.725008	0.86999	No	Antisense	AT1G71400	Non-overlapped	CDS	0	1780	#N/A	#N/A	#N/A
AT5G58770	Chr5:23734376-23735634[+]	#N/A	Undecaprenyl pyrophosphate synthetase family protein	Chr5:23735665-23736874[+]	1210	0.0523281	0.0960676	0.0115612	0.280899	1.91322	No	Antisense	AT5G58780	3' UTR	CDS	6	1216	#N/A	#N/A	#N/A
AT1G61255	Chr1:22589151-22589691[-]	#N/A	BEST Arabidopsis thaliana protein match is: glycine-rich protein (TAIR:AT4G21620.2); Has 58 Blast hits to 58 proteins in 12 species: Archae - 0; Bacteria - 2; Metazoa - 0; Fungi - 0; Plants - 56; Viruses - 0; Other Eukaryotes - 0 (source: NCBI BLink).	Chr1:22588901-22589150[-]	250	0.063317	0.185987	0.149217	0.42486	2.30975	No	Antisense	AT1G61250	Non-overlapped	3' UTR	0	69	#N/A	#N/A	#N/A
AT3G48990	Chr3:18158747-18161379[-]	#N/A	AMP-dependent synthetase and ligase family protein	Chr3:18155587-18158666[-]	3080	0.0325493	0.0169834	0.0090838	0.924209	1.18623	No	Antisense	AT3G48980	Non-overlapped	CDS	0	2831	#N/A	#N/A	#N/A
AT1G70520	Chr1:26584729-26587419[-]	CRK2	cysteine-rich RLK (RECEPTOR-like protein kinase) 2	Chr1:26584089-26584698[-]	610	0.0715446	0.009851	0.0237103	1.63823	2.57133	No	Antisense	AT1G70518	Non-overlapped	Other noncoding gene	0	596	#N/A	#N/A	#N/A
AT3G55040	Chr3:20398538-20400346[-]	GSTL2	glutathione transferase lambda 2	Chr3:20396478-20398537[-]	2060	0.0281946	0.137538	0.0711911	1.48782	1.0018	No	Antisense	AT3G55030	3' UTR	Promoter	116	1894	#N/A	#N/A	#N/A
AT3G62580	Chr3:23146828-23147951[+]	#N/A	Late embryogenesis abundant protein (LEA) family protein	Chr3:23147972-23148571[+]	600	0.0263821	0.164676	0.0544019	0.743506	0.936148	No	Antisense	AT3G62590	3' UTR	CDS	34	634	#N/A	#N/A	#N/A
AT3G58500	Chr3:21635226-21639105[-]	PP2A-4	protein phosphatase 2A-4	Chr3:21634416-21635155[-]	740	0.0142606	0.0235625	0.00630138	0.193771	0.503661	No	Antisense	AT3G58490	Non-overlapped	CDS	0	691	#N/A	#N/A	#N/A
AT1G03090	Chr1:739679-744184[+]	MCCA	methylcrotonyl-CoA carboxylase alpha chain, mitochondrial / 3-methylcrotonyl-CoA carboxylase 1 (MCCA)	Chr1:744205-746754[+]	2550	0.0517296	0.018234	0.0054859	1.10172	1.80951	No	Antisense	AT1G03100	CDS	Promoter	300	2575	#N/A	#N/A	#N/A
AT1G17840	Chr1:6142564-6146521[+]	WBC11, ABCG11, DSO, COF1, ATWBC11	white-brown complex homolog protein 11	Chr1:6146532-6149300[+]	2769	0.0590715	0.0356828	0.0218921	0.496745	2.06451	No	Antisense	AT1G17850	CDS	Promoter	596	3005	#N/A	#N/A	#N/A
AT2G41110	Chr2:17140229-17141431[+]	CAM2	calmodulin 2	Chr2:17141452-17142711[+]	1260	0.0541171	0.0347732	0.00797097	1.47521	1.8889	No	Antisense	AT2G41120	3' UTR	Promoter	157	1163	#N/A	#N/A	#N/A
AT5G67530	Chr5:26941182-26944146[+]	ATPUB49, PUB49	plant U-box 49	Chr5:26944147-26944876[+]	730	0.0289119	0.0477706	0.0191631	0.603826	1.00674	No	Antisense	AT5G67540	3' UTR	CDS	119	849	#N/A	#N/A	#N/A
AT4G02620	Chr4:1149248-1151346[-]	#N/A	vacuolar ATPase subunit F family protein	Chr4:1148128-1149217[-]	1090	0.0290445	0.0799829	0.068448	0.657754	1.00173	No	Antisense	AT4G02610	3' UTR	CDS	89	1179	#N/A	#N/A	#N/A
AT3G08890	Chr3:2706632-2708747[+]	#N/A	Protein of unknown function, DUF538	Chr3:2708768-2710017[+]	1250	0.0295479	0.181337	0.123104	0.692523	1.00369	No	Antisense	AT3G08900	CDS	Promoter	662	1609	#N/A	#N/A	#N/A
AT4G00100	Chr4:37084-38312[+]	ATRPS13A, RPS13, PFL2, RPS13A	ribosomal protein S13A	Chr4:38363-40132[+]	1770	0.0268292	0.0525387	0.0263447	0.618088	0.907528	Yes	Antisense	AT4G00110	Non-overlapped	5' UTR	0	1629	#N/A	#N/A	#N/A
AT5G46860	Chr5:19012021-19014004[-]	VAM3, ATVAM3, SYP22, ATSYP22, SGR3	Syntaxin/t-SNARE family protein	Chr5:19010631-19012020[-]	1390	0.0303679	0.0501763	0.0670938	0.554	1.00457	No	Antisense	AT5G46850	3' UTR	5' UTR	18	1408	#N/A	#N/A	#N/A
AT3G05840	Chr3:1739981-1743163[+]	ATSK12	Protein kinase superfamily protein	Chr3:1743204-1743463[+]	260	0.142057	0.447084	0.26902	1.30726	4.62354	No	Antisense	AT3G05850	Non-overlapped	Other noncoding gene	0	51	#N/A	#N/A	#N/A
AT4G03260	Chr4:1428171-1431663[+]	#N/A	Outer arm dynein light chain 1 protein	Chr4:1431734-1433873[+]	2140	0.0567092	0.103205	0.0566535	1.14156	1.84221	No	Antisense	AT4G03270	Non-overlapped	Promoter	0	1317	#N/A	#N/A	#N/A
AT1G72370	Chr1:27242943-27244931[-]	P40, AP40, RP40, RPSAA	40s ribosomal protein SA	Chr1:27241593-27242922[-]	1330	0.0912463	0.03496	0.0350603	1.59722	2.91679	No	Antisense	AT1G72360	Non-overlapped	Promoter	0	1021	#N/A	#N/A	#N/A
AT2G01620	Chr2:278127-279296[+]	MEE11	RNI-like superfamily protein	Chr2:281217-281516[+]	300	0.0263821	0.116242	0.0466302	0.557629	0.839909	No	Antisense	AT2G01630	3' UTR	CDS	15	315	#N/A	#N/A	#N/A
AT2G14080	Chr2:5925186-5929600[+]	#N/A	Disease resistance protein (TIR-NBS-LRR class) family	Chr2:5929911-5930350[+]	440	0.0239837	0.0792558	0.0317933	0.531076	0.763553	No	Antisense	AT2G14090	Non-overlapped	Other noncoding gene	0	351	#N/A	#N/A	#N/A
AT5G49910	Chr5:20303414-20306469[+]	CPHSC70-2EAT SHOCK PROTEIN 70-2, HSC70-7, cpHsc70-2	chloroplast heat shock protein 70-2	Chr5:20306510-20307829[+]	1320	0.0599593	0.118884	0.060054	0.317841	1.89695	No	Antisense	AT5G49920	3' UTR	5' UTR	61	1381	#N/A	#N/A	#N/A
AT4G20360	Chr4:10989952-10991709[+]	ATRAB8D, ATRABE1B, RABE1b	RAB GTPase homolog E1B	Chr4:10992000-10992299[+]	300	0.0703522	0.0581209	0.0621736	0.531076	2.18726	No	Antisense	AT4G20362	Other noncoding gene	Other noncoding gene	95	255	#N/A	#N/A	#N/A
AT5G06220	Chr5:1879937-1885643[+]	#N/A	LETM1-like protein	Chr5:1885774-1887183[+]	1410	0.0449057	0.0741969	0.0529137	0.553675	1.3924	Yes	Antisense	AT5G06230	CDS	Promoter	716	2064	#N/A	#N/A	#N/A
AT1G24280	Chr1:8609445-8612580[+]	G6PD3	glucose-6-phosphate dehydrogenase 3	Chr1:8612581-8612900[+]	320	0.0329776	0.0363256	0.0145719	0.780017	1.01708	No	Antisense	AT1G24290	3' UTR	CDS	76	396	#N/A	#N/A	#N/A
AT2G33255	Chr2:14098778-14100593[+]	#N/A	Haloacid dehalogenase-like hydrolase (HAD) superfamily protein	Chr2:14100594-14102763[+]	2170	0.041336	0.0937434	0.0709123	0.609391	1.26518	No	Antisense	AT2G33260	Non-overlapped	Promoter	0	1413	#N/A	#N/A	#N/A
AT3G15730	Chr3:5330322-5333745[+]	PLDALPHA1, PLD	phospholipase D alpha 1	Chr3:5333746-5335077[+]	1332	0.150528	0.296713	0.350076	3.11788	4.59522	No	Antisense	AT3G15740	Non-overlapped	Promoter	0	675	#N/A	#N/A	#N/A
AT2G31040	Chr2:13208906-13211085[-]	#N/A	ATP synthase protein I -related	Chr2:13208506-13208895[-]	390	0.0270586	0.0447084	0.0717387	0.476606	0.821065	No	Antisense	AT2G31035	CDS	Promoter	13	242	#N/A	#N/A	#N/A
AT4G28290	Chr4:14011844-14012583[-]	#N/A	unknown protein; FUNCTIONS IN: molecular_function unknown; INVOLVED IN: biological_process unknown; LOCATED IN: chloroplast; EXPRESSED IN: 23 plant structures; EXPRESSED DURING: 15 growth stages; Has 45 Blast hits to 45 proteins in 11 species: Archae - 0; Bacteria - 0; Metazoa - 0; Fungi - 0; Plants - 45; Viruses - 0; Other Eukaryotes - 0 (source: NCBI BLink).	Chr4:14010864-14011763[-]	900	0.164155	0.245399	0.222789	1.45751	4.97529	No	Antisense	AT4G28280	Non-overlapped	CDS	0	695	#N/A	#N/A	#N/A
AT5G24470	Chr5:8355951-8358873[-]	APRR5, PRR5	pseudo-response regulator 5	Chr5:8354591-8355950[-]	1360	0.0892335	0.170944	0.161148	1.80409	2.68647	No	Antisense	AT5G24460	Non-overlapped	Promoter	0	1176	#N/A	#N/A	#N/A
AT3G51390	Chr3:19075576-19078120[+]	#N/A	DHHC-type zinc finger family protein	Chr3:19078121-19078430[+]	310	0.0340414	0.0562461	0.045126	0.394024	1.01602	No	Antisense	AT3G51400	CDS	CDS	271	581	#N/A	#N/A	#N/A
AT1G27770	Chr1:9671638-9676157[-]	ACA1, PEA1	autoinhibited Ca2+-ATPase 1	Chr1:9671208-9671617[-]	410	0.0239837	0.0528372	0.0211955	1.01387	0.715831	No	Antisense	AT1G27760	Non-overlapped	CDS	0	409	#N/A	#N/A	#N/A
AT1G53440	Chr1:19945959-19951562[+]	#N/A	Leucine-rich repeat transmembrane protein kinase	Chr1:19951693-19952102[+]	410	0.0128693	0.0708792	0.0227464	0.531076	0.384105	No	Antisense	AT1G53450	3' UTR	CDS	557	967	#N/A	#N/A	#N/A
AT5G65540	Chr5:26195689-26198322[+]	#N/A	unknown protein; Has 6825 Blast hits to 3811 proteins in 289 species: Archae - 0; Bacteria - 184; Metazoa - 2139; Fungi - 760; Plants - 816; Viruses - 52; Other Eukaryotes - 2874 (source: NCBI BLink).	Chr5:26198333-26200182[+]	1850	0.0998241	0.361292	0.22685	1.57026	2.95387	No	Antisense	AT5G65550	3' UTR	Promoter	19	1514	#N/A	#N/A	#N/A
AT2G20820	Chr2:8964349-8965430[+]	#N/A	unknown protein; Has 36 Blast hits to 36 proteins in 10 species: Archae - 0; Bacteria - 0; Metazoa - 0; Fungi - 0; Plants - 36; Viruses - 0; Other Eukaryotes - 0 (source: NCBI BLink).	Chr2:8965541-8966280[+]	740	0.0213909	0.00785418	0.0378083	0.380365	0.63135	No	Antisense	AT2G20825	Non-overlapped	CDS	0	525	#N/A	#N/A	#N/A
AT4G31010	Chr4:15106644-15108636[+]	#N/A	RNA-binding CRS1 / YhbY (CRM) domain-containing protein	Chr4:15108637-15109716[+]	1080	0.034199	0.0107631	0.0259057	0.762192	1.00128	No	Antisense	AT4G31020	3' UTR	CDS	536	1616	#N/A	#N/A	#N/A
AT3G61415	Chr3:22722710-22726424[-]	ASK21, SK21	SKP1-like 21	Chr3:22720850-22722679[-]	1830	0.175881	0.266785	0.219136	0.737121	5.14616	No	Antisense	AT3G61410	Non-overlapped	Promoter	0	1668	#N/A	#N/A	#N/A
AT5G13280	Chr5:4249438-4252836[+]	AK-LYS1, AK1, AK	aspartate kinase 1	Chr5:4252867-4254156[+]	1290	0.0286317	0.09011	0.0216885	0.489907	0.834212	No	Antisense	AT5G13290	Non-overlapped	CDS	0	1290	#N/A	#N/A	#N/A
AT1G29390	Chr1:10286293-10288103[-]	COR314-TM2, COR413IM2	cold regulated 314 thylakoid membrane 2	Chr1:10283199-10286272[-]	3074	0.0583599	0.313861	0.306418	0.813717	1.69915	No	Antisense	AT1G29380	Non-overlapped	Promoter	0	1850	#N/A	#N/A	#N/A
AT5G08790	Chr5:2858849-2860262[-]	ATAF2, anac081	NAC (No Apical Meristem) domain transcriptional regulator superfamily protein	Chr5:2856541-2858848[-]	2308	0.0502951	0.0377736	0.0181833	1.19423	1.4511	No	Antisense	AT5G08780	3' UTR	Promoter	158	2267	#N/A	#N/A	#N/A
AT3G14590	Chr3:4904270-4907993[-]	NTMC2TYPE6.2, NTMC2T6.2	Calcium-dependent lipid-binding (CaLB domain) family protein	Chr3:4903540-4904209[-]	670	0.0125629	0.0830299	0.155434	0.480497	0.362461	No	Antisense	AT3G14580	Non-overlapped	CDS	0	670	#N/A	#N/A	#N/A
AT2G30780	Chr2:13116474-13118808[+]	#N/A	Tetratricopeptide repeat (TPR)-like superfamily protein	Chr2:13118889-13120318[+]	1430	0.036898	0.0772236	0.0489128	0.460513	1.0609	Yes	Antisense	AT2G30790	Non-overlapped	Promoter	0	1154	#N/A	#N/A	#N/A
AT1G17210	Chr1:5880130-5884756[-]	ATILP1, ILP1	IAP-like protein 1	Chr1:5879310-5880119[-]	810	0.0586269	0.136333	0.0287841	0.786779	1.685	No	Antisense	AT1G17200	Non-overlapped	CDS	0	732	#N/A	#N/A	#N/A
AT5G26210	Chr5:9158318-9160383[-]	AL4	alfin-like 4	Chr5:9156808-9158307[-]	1500	0.168845	0.209235	0.0559562	1.2498	4.84347	No	Antisense	AT5G26200	3' UTR	Promoter	87	1253	#N/A	#N/A	#N/A
AT1G07570	Chr1:2331170-2333738[-]	APK1A	Protein kinase superfamily protein	Chr1:2330370-2331139[-]	770	0.02741	0.045289	0.0121117	0.248295	0.777188	No	Antisense	AT1G07560	Non-overlapped	CDS	0	727	#N/A	#N/A	#N/A
AT1G06680	Chr1:2047825-2049418[+]	PSBP-1, OEE2, PSII-P, OE23	photosystem II subunit P-1	Chr1:2049419-2052348[+]	2930	0.0396182	0.0218201	0.0127318	0.523825	1.10901	Yes	Antisense	AT1G06690	Non-overlapped	Promoter	0	2553	#N/A	#N/A	#N/A
AT2G03390	Chr2:1030402-1032625[-]	#N/A	uvrB/uvrC motif-containing protein	Chr2:1030172-1030371[-]	200	0.0263821	0	0	0.345199	0.73492	No	Antisense	AT2G03380	Non-overlapped	CDS	0	190	#N/A	#N/A	#N/A
AT1G04040	Chr1:1042362-1043864[-]	#N/A	HAD superfamily, subfamily IIIB acid phosphatase	Chr1:1041742-1042231[-]	490	0.0107682	0	0.0190327	0.151736	0.299967	No	Antisense	AT1G04030	3' UTR	CDS	531	1021	#N/A	#N/A	#N/A
AT3G21055	Chr3:7376635-7377186[-]	PSBTN	photosystem II subunit T	Chr3:7374725-7376594[-]	1870	0.0705403	0.217565	0.0947565	0.968432	1.95099	No	Antisense	AT3G21050	Non-overlapped	Other noncoding gene	0	1263	#N/A	#N/A	#N/A
AT3G28900	Chr3:10902647-10904458[-]	#N/A	Ribosomal protein L34e superfamily protein	Chr3:10902047-10902636[-]	590	0.0357723	0	0.00790342	0.675096	0.978707	No	Antisense	AT3G28899	Non-overlapped	Promoter	0	189	#N/A	#N/A	#N/A
AT5G58570	Chr5:23672695-23673287[-]	#N/A	unknown protein; Has 30201 Blast hits to 17322 proteins in 780 species: Archae - 12; Bacteria - 1396; Metazoa - 17338; Fungi - 3422; Plants - 5037; Viruses - 0; Other Eukaryotes - 2996 (source: NCBI BLink).	Chr5:23670255-23672304[-]	2050	0.0411818	0.102066	0.0545914	0.33937	1.12415	No	Antisense	AT5G58560	3' UTR	Promoter	183	2093	#N/A	#N/A	#N/A
AT4G16440	Chr4:9269094-9271669[-]	#N/A	ferredoxin hydrogenases	Chr4:9267034-9269083[-]	2050	0.0823636	0.0963957	0.0386689	0.753868	2.24061	No	Antisense	AT4G16430	3' UTR	Promoter	85	1909	#N/A	#N/A	#N/A
AT1G71110	Chr1:26818083-26821004[+]	#N/A	unknown protein; FUNCTIONS IN: molecular_function unknown; INVOLVED IN: biological_process unknown; LOCATED IN: endomembrane system; BEST Arabidopsis thaliana protein match is: unknown protein (TAIR:AT2G12400.1); Has 173 Blast hits to 169 proteins in 21 species: Archae - 0; Bacteria - 0; Metazoa - 3; Fungi - 0; Plants - 165; Viruses - 0; Other Eukaryotes - 5 (source: NCBI BLink).	Chr1:26821015-26821444[+]	430	0.0368122	0.121648	0.0867538	0.580478	1.00105	No	Antisense	AT1G71120	Non-overlapped	CDS	0	373	#N/A	#N/A	#N/A
AT1G80210	Chr1:30162835-30165755[-]	BRCC36A, AtBRCC36A	Mov34/MPN/PAD-1 family protein	Chr1:30162265-30162834[-]	570	0.0370275	0.0101967	0.00818073	0.335416	1.00384	No	Antisense	AT1G80200	CDS	CDS	165	735	#N/A	#N/A	#N/A
AT1G76630	Chr1:28759699-28765042[+]	#N/A	Tetratricopeptide repeat (TPR)-like superfamily protein	Chr1:28765243-28765722[+]	480	0.0109925	0.0242171	0.00971462	0.121705	0.29528	Yes	Antisense	AT1G76640	Non-overlapped	CDS	0	399	#N/A	#N/A	#N/A
AT4G29950	Chr4:14657045-14660573[+]	#N/A	Ypt/Rab-GAP domain of gyp1p superfamily protein	Chr4:14660574-14662513[+]	1940	0.0543961	0.0299592	0.0120181	0.843151	1.44765	No	Antisense	AT4G29960	3' UTR	Promoter	7	1837	#N/A	#N/A	#N/A
AT1G50570	Chr1:18726235-18728289[-]	#N/A	Calcium-dependent lipid-binding (CaLB domain) family protein	Chr1:18724055-18726224[-]	2170	0.196954	0.441933	0.427622	3.20114	5.19863	No	Antisense	AT1G50560	3' UTR	Promoter	38	2056	#N/A	#N/A	#N/A
AT3G48320	Chr3:17891134-17892847[+]	CYP71A21	cytochrome P450, family 71, subfamily A, polypeptide 21	Chr3:17892888-17894277[+]	1390	0.0379598	0.0334509	0.0268375	1.07743	0.985684	No	Antisense	AT3G48330	3' UTR	Promoter	110	1198	#N/A	#N/A	#N/A
AT5G64270	Chr5:25706659-25710925[+]	#N/A	splicing factor, putative	Chr5:25710926-25713535[+]	2610	0.052562	0.0823936	0.0607443	0.697927	1.35761	No	Antisense	AT5G64280	Non-overlapped	Promoter	0	2405	#N/A	#N/A	#N/A
AT3G49860	Chr3:18491122-18492177[-]	ATARLA1B, ARLA1B	ADP-ribosylation factor-like A1B	Chr3:18489632-18491011[-]	1380	0.0344114	0.0421166	0.013516	0.138541	0.886317	No	Antisense	AT3G49850	Non-overlapped	CDS	0	1365	#N/A	#N/A	#N/A
AT4G20860	Chr4:11172622-11174467[+]	#N/A	FAD-binding Berberine family protein	Chr4:11174488-11175697[+]	1210	0.0348854	0	0.0154149	0.636413	0.889366	No	Antisense	AT4G20870	3' UTR	CDS	18	1228	#N/A	#N/A	#N/A
AT4G38360	Chr4:17967107-17969958[+]	LAZ1	Protein of unknown function (DUF300)	Chr4:17969959-17971408[+]	1450	0.0582225	0.1924	0.10934	1.0182	1.4807	No	Antisense	AT4G38370	3' UTR	Promoter	52	1389	#N/A	#N/A	#N/A
AT3G59040	Chr3:21821349-21824348[-]	#N/A	Tetratricopeptide repeat (TPR)-like superfamily protein	Chr3:21820949-21821328[-]	380	0.0416559	0.0917699	0.0490844	0.559027	1.04989	No	Antisense	AT3G59030	3' UTR	CDS	92	472	#N/A	#N/A	#N/A
AT1G15040	Chr1:5179887-5181389[-]	#N/A	Class I glutamine amidotransferase-like superfamily protein	Chr1:5177357-5179876[-]	2520	0.0656903	0.0256759	0.0112362	2.02406	1.65283	No	Antisense	AT1G15030	3' UTR	Promoter	163	2511	#N/A	#N/A	#N/A
AT1G70490	Chr1:26563924-26565810[-]	ATARFA1D, ARFA1D	Ras-related small GTP-binding family protein	Chr1:26561524-26563873[-]	2350	0.0763397	0.128608	0.176599	0.842941	1.90766	No	Antisense	AT1G70480	Non-overlapped	Promoter	0	1986	#N/A	#N/A	#N/A
AT5G46410	Chr5:18825103-18829221[+]	SSP4	SCP1-like small phosphatase 4	Chr5:18829302-18829954[+]	653	0.113124	1.95813	0.992587	1.69163	2.7654	No	Antisense	AT5G46417	Non-overlapped	Promoter	0	108	#N/A	#N/A	#N/A
AT1G22810	Chr1:8074231-8075037[-]	#N/A	Integrase-type DNA-binding superfamily protein	Chr1:8073221-8074230[-]	1010	0.0472515	0.0607234	0.0208792	1.32373	1.15174	No	Antisense	AT1G22800	3' UTR	CDS	127	1137	#N/A	#N/A	#N/A
AT1G05630	Chr1:1682318-1687363[+]	AT5PTASE13, 5PTASE13	Endonuclease/exonuclease/phosphatase family protein	Chr1:1687434-1689903[+]	2470	0.0512688	0.145891	0.054748	0.735335	1.24329	Yes	Antisense	AT1G05640	Non-overlapped	Promoter	0	2066	#N/A	#N/A	#N/A
AT3G49130	Chr3:18210453-18211708[+]	#N/A	SWAP (Suppressor-of-White-APricot)/surp RNA-binding domain-containing protein	Chr3:18211719-18212008[+]	290	0.0545836	0.0200417	0.209032	0.714205	1.30331	No	Antisense	AT3G49140	Non-overlapped	3' UTR	0	146	#N/A	#N/A	#N/A
AT1G03130	Chr1:753307-754198[-]	PSAD-2	photosystem I subunit D-2	Chr1:753027-753276[-]	250	0.0422113	0.0232484	0	0.276159	1.00789	No	Antisense	AT1G03120	Non-overlapped	CDS	0	114	#N/A	#N/A	#N/A
AT2G28930	Chr2:12424303-12426674[+]	APK1B, PK1B	protein kinase 1B	Chr2:12426745-12427674[+]	930	0.0226943	0.0187487	0.030084	0.274104	0.541877	No	Antisense	AT2G28940	Non-overlapped	CDS	0	930	#N/A	#N/A	#N/A
AT3G10840	Chr3:3391065-3393290[-]	#N/A	alpha/beta-Hydrolases superfamily protein	Chr3:3390135-3391044[-]	910	0.0463861	0.134125	0.0717387	0.962939	1.09603	No	Antisense	AT3G10820	Non-overlapped	CDS	0	869	#N/A	#N/A	#N/A
AT3G13670	Chr3:4469222-4473547[+]	#N/A	Protein kinase family protein	Chr3:4473558-4474747[+]	1190	0.0665095	0.239321	0.129311	0.593555	1.56601	No	Antisense	AT3G13672	CDS	Promoter	986	1807	#N/A	#N/A	#N/A
AT5G01600	Chr5:227953-230051[-]	ATFER1, FER1	ferretin 1	Chr5:227703-227942[-]	240	0.0439701	0	0.0388585	0.84087	1.02801	No	Antisense	AT5G01595	Other noncoding gene	Other noncoding gene	2061	2301	#N/A	#N/A	#N/A
AT2G40730	Chr2:16989836-16996298[-]	#N/A	Protein kinase family protein with ARM repeat domain	Chr2:16989576-16989825[-]	250	0.0422113	0.0697451	0.0373041	0.42486	0.986893	No	Antisense	AT2G40720	CDS	CDS	16	266	#N/A	#N/A	#N/A
AT4G04320	Chr4:2113404-2116693[+]	#N/A	malonyl-CoA decarboxylase family protein	Chr4:2116704-2116953[+]	250	0.0422113	0.0929935	0.0559562	0.403617	0.986893	No	Antisense	AT4G04330	3' UTR	CDS	141	391	#N/A	#N/A	#N/A
AT1G15030	Chr1:5177529-5180049[+]	#N/A	Protein of unknown function (DUF789)	Chr1:5180060-5181699[+]	1640	0.14478	0.113407	0.036963	1.49284	3.37372	No	Antisense	AT1G15040	CDS	Promoter	163	1493	#N/A	#N/A	#N/A
AT4G30960	Chr4:15067053-15069010[+]	CIPK6, SIP3, SNRK3.14, ATCIPK6	SOS3-interacting protein 3	Chr4:15069021-15069380[+]	360	0.0439701	0.258315	0.207245	0.177025	1.02072	No	Antisense	AT4G30970	Non-overlapped	CDS	0	115	#N/A	#N/A	#N/A
AT1G08550	Chr1:2706924-2709531[+]	NPQ1, AVDE1	non-photochemical quenching 1	Chr1:2709542-2711231[+]	1690	0.146741	0.161638	0.0717387	1.11872	3.39194	No	Antisense	AT1G08560	Non-overlapped	Promoter	0	1281	#N/A	#N/A	#N/A
AT1G49400	Chr1:18283032-18284202[+]	emb1129	Nucleic acid-binding, OB-fold-like protein	Chr1:18284233-18284752[+]	520	0.0304409	0.0670626	0.0538041	0.653631	0.696559	No	Antisense	AT1G49405	Non-overlapped	CDS	0	418	#N/A	#N/A	#N/A
AT4G25670	Chr4:13085198-13087090[-]	#N/A	unknown protein; BEST Arabidopsis thaliana protein match is: unknown protein (TAIR:AT4G25690.2); Has 30201 Blast hits to 17322 proteins in 780 species: Archae - 12; Bacteria - 1396; Metazoa - 17338; Fungi - 3422; Plants - 5037; Viruses - 0; Other Eukaryotes - 2996 (source: NCBI BLink).	Chr4:13083198-13085197[-]	2000	0.0659552	0.0668391	0.0256466	0.477968	1.48559	No	Antisense	AT4G25660	Non-overlapped	Promoter	0	1782	#N/A	#N/A	#N/A
AT2G36390	Chr2:15264237-15270092[+]	SBE2.1, BE3	starch branching enzyme 2.1	Chr2:15270093-15271302[+]	1210	0.0872135	0.35545	0.489424	0.55741	1.95661	No	Antisense	AT2G36400	3' UTR	CDS	5	1215	#N/A	#N/A	#N/A
AT5G25350	Chr5:8794252-8797020[-]	EBF2	EIN3-binding F box protein 2	Chr5:8793492-8794141[-]	650	0.0892932	0.223542	0.200868	1.28275	2.00286	No	Antisense	AT5G25340	3' UTR	CDS	533	1183	#N/A	#N/A	#N/A
AT1G52780	Chr1:19658643-19662181[+]	#N/A	Protein of unknown function (DUF2921)	Chr1:19662192-19663431[+]	1240	0.072338	0.229671	0.165462	1.16494	1.6214	No	Antisense	AT1G52790	Non-overlapped	Promoter	0	1108	#N/A	#N/A	#N/A
AT4G34000	Chr4:16295430-16298255[+]	ABF3, DPBF5	abscisic acid responsive elements-binding factor 3	Chr4:16298266-16301105[+]	2840	0.0631684	0.092093	0.054183	0.259928	1.40478	No	Antisense	AT4G34020	Non-overlapped	Promoter	0	2673	#N/A	#N/A	#N/A
AT4G09140	Chr4:5816942-5821037[-]	ATMLH1, MLH1	MUTL-homologue 1	Chr4:5816582-5816931[-]	350	0.0452264	0.232484	0.146552	0.576596	1.00489	No	Antisense	AT4G09130	Non-overlapped	CDS	0	341	#N/A	#N/A	#N/A
AT1G15290	Chr1:5257046-5264942[-]	#N/A	Tetratricopeptide repeat (TPR)-like superfamily protein	Chr1:5256606-5256995[-]	390	0.0405878	0.10432	0.0358694	0.272346	0.901825	No	Antisense	AT1G15280	Non-overlapped	3' UTR	0	148	#N/A	#N/A	#N/A
AT4G03505	Chr4:1556888-1557319[-]	#N/A	BEST Arabidopsis thaliana protein match is: Ankyrin repeat family protein (TAIR:AT4G03470.1); Has 35333 Blast hits to 34131 proteins in 2444 species: Archae - 798; Bacteria - 22429; Metazoa - 974; Fungi - 991; Plants - 531; Viruses - 0; Other Eukaryotes - 9610 (source: NCBI BLink).	Chr4:1555718-1556877[-]	1160	0.0454864	0.0300625	0.0723572	0.553967	1.00916	No	Antisense	AT4G03500	Non-overlapped	CDS	0	854	#N/A	#N/A	#N/A
AT4G38540	Chr4:18023121-18025027[+]	#N/A	FAD/NAD(P)-binding oxidoreductase family protein	Chr4:18025058-18025634[+]	577	0.064012	0.130948	0.113141	1.74878	1.40106	No	Antisense	AT4G38545	Other noncoding gene	Other noncoding gene	1907	2137	#N/A	#N/A	#N/A
AT2G20780	Chr2:8947242-8949413[-]	#N/A	Major facilitator superfamily protein	Chr2:8946782-8947241[-]	460	0.0458819	0.189525	0.141918	0.981335	1.00424	No	Antisense	AT2G20770	3' UTR	CDS	69	529	#N/A	#N/A	#N/A
AT1G78140	Chr1:29401759-29403946[-]	#N/A	S-adenosyl-L-methionine-dependent methyltransferases superfamily protein	Chr1:29399829-29401748[-]	1920	0.0659552	0.148329	0.0922889	0.594694	1.43539	No	Antisense	AT1G78130	CDS	Promoter	144	1753	#N/A	#N/A	#N/A
AT4G36940	Chr4:17416855-17420252[+]	NAPRT1	nicotinate phosphoribosyltransferase 1	Chr4:17420273-17421992[+]	1720	0.0889629	0.202747	0.113864	1.00966	1.93191	No	Antisense	AT4G36945	CDS	CDS	335	2055	#N/A	#N/A	#N/A
AT3G04030	Chr3:1042882-1044698[-]	#N/A	Homeodomain-like superfamily protein	Chr3:1042402-1042871[-]	470	0.0561321	0.655406	0.416695	0.564974	1.20625	No	Antisense	AT3G04020	Non-overlapped	3' UTR	0	117	#N/A	#N/A	#N/A
AT5G20080	Chr5:6782566-6786664[+]	#N/A	FAD/NAD(P)-binding oxidoreductase	Chr5:6786765-6787384[+]	620	0.0340414	0.0468717	0.030084	0.145617	0.711213	No	Antisense	AT5G20090	Non-overlapped	CDS	0	383	#N/A	#N/A	#N/A
AT4G03230	Chr4:1419278-1423337[-]	#N/A	S-locus lectin protein kinase family protein	Chr4:1418868-1419147[-]	280	0.0188443	0.0207575	0.0166536	0.246571	0.393707	No	Antisense	AT4G03220	Non-overlapped	CDS	0	280	#N/A	#N/A	#N/A
AT4G02890	Chr4:1278530-1280031[-]	UBQ14	Ubiquitin family protein	Chr4:1278180-1278399[-]	220	0.0959349	0.105674	0.0211955	0.724194	1.98047	No	Antisense	AT4G02880	3' UTR	3' UTR	189	409	#N/A	#N/A	#N/A
AT5G52180	Chr5:21200055-21201610[-]	#N/A	LOCATED IN: endomembrane system; EXPRESSED IN: 22 plant structures; EXPRESSED DURING: 13 growth stages; CONTAINS InterPro DOMAIN/s: Transmembrane protein 161AB, predicted (InterPro:IPR019395); Has 82 Blast hits to 82 proteins in 35 species: Archae - 0; Bacteria - 0; Metazoa - 47; Fungi - 0; Plants - 33; Viruses - 0; Other Eukaryotes - 2 (source: NCBI BLink).	Chr5:21198735-21200044[-]	1310	0.12889	0.341627	0.177978	1.60944	2.64475	No	Antisense	AT5G52170	Non-overlapped	CDS	0	1225	#N/A	#N/A	#N/A
AT1G72060	Chr1:27118447-27119011[+]	#N/A	serine-type endopeptidase inhibitors	Chr1:27119032-27119281[+]	250	0.0422113	0.0464967	0	0.446103	0.860906	No	Antisense	AT1G72070	CDS	CDS	391	641	#N/A	#N/A	#N/A
AT2G40880	Chr2:17057402-17058122[+]	FL3-27, ATCYSA, CYSA	cystatin A	Chr2:17058143-17059522[+]	1380	0.208694	0.212532	0.076557	2.52063	4.21913	Yes	Antisense	AT2G40890	3' UTR	CDS	70	1450	#N/A	#N/A	#N/A
AT1G14020	Chr1:4802720-4805375[+]	#N/A	O-fucosyltransferase family protein	Chr1:4805386-4807615[+]	2230	0.104109	0.151167	0.0564581	1.00023	2.08329	No	Antisense	AT1G14030	3' UTR	Promoter	70	2202	#N/A	#N/A	#N/A
AT3G05880	Chr3:1755497-1756540[-]	RCI2A	Low temperature and salt responsive protein family	Chr3:1755277-1755486[-]	210	0.0753774	0.304443	1.17686	0.429918	1.49984	No	Antisense	AT3G05870	3' UTR	3' UTR	135	345	#N/A	#N/A	#N/A
AT4G33580	Chr4:16138359-16141624[+]	ATBCA5, BCA5	beta carbonic anhydrase 5	Chr4:16141655-16141914[+]	260	0.0405878	0.0223542	0.0538041	0.183834	0.807604	No	Antisense	AT4G33585	3' UTR	CDS	90	350	#N/A	#N/A	#N/A
AT2G42320	Chr2:17627342-17630797[+]	#N/A	nucleolar protein gar2-related	Chr2:17630908-17631297[+]	390	0.0405878	0.0298056	0.0956517	0.108939	0.807604	No	Antisense	AT2G42330	3' UTR	3' UTR	69	459	#N/A	#N/A	#N/A
AT4G09800	Chr4:6173715-6175200[+]	RPS18C	S18 ribosomal protein	Chr4:6175241-6175540[+]	300	0.0351761	0.0387473	0.0932604	0.21243	0.699924	No	Antisense	AT4G09810	3' UTR	CDS	25	325	#N/A	#N/A	#N/A
AT5G15450	Chr5:5014212-5018347[-]	APG6, CLPB3, CLPB-P	casein lytic proteinase B3	Chr5:5013932-5014141[-]	210	0.0251258	0.138383	0.111024	0.126447	0.499946	No	Antisense	AT5G15440	3' UTR	CDS	70	280	#N/A	#N/A	#N/A
AT1G15820	Chr1:5446462-5447859[-]	LHCB6, CP24	light harvesting complex photosystem II subunit 6	Chr1:5444092-5446411[-]	2320	0.126726	0.119287	0.0468338	1.97588	2.51239	No	Antisense	AT1G15810	3' UTR	Promoter	103	2097	#N/A	#N/A	#N/A
AT4G11670	Chr4:7044244-7053091[-]	#N/A	Protein of unknown function (DUF810)	Chr4:7042364-7044163[-]	1800	0.0615582	0.0710367	0.0310868	0.896928	1.21029	No	Antisense	AT4G11660	3' UTR	Promoter	465	1999	#N/A	#N/A	#N/A
AT1G67950	Chr1:25478713-25480580[-]	#N/A	RNA-binding (RRM/RBD/RNP motifs) family protein	Chr1:25477473-25478702[-]	1230	0.0986647	0.151209	0.117523	1.09237	1.92906	No	Antisense	AT1G67940	3' UTR	Promoter	91	1124	#N/A	#N/A	#N/A
AT1G60770	Chr1:22366701-22368714[-]	#N/A	Tetratricopeptide repeat (TPR)-like superfamily protein	Chr1:22365991-22366620[-]	630	0.0167505	0.0461277	0.0148032	0.134876	0.324965	No	Antisense	AT1G60760	Non-overlapped	CDS	0	333	#N/A	#N/A	#N/A
AT2G30600	Chr2:13036876-13041684[+]	#N/A	BTB/POZ domain-containing protein	Chr2:13041705-13042554[+]	850	0.0900852	0.0212638	0.0170598	1.62561	1.73487	No	Antisense	AT2G30615	3' UTR	5' UTR	600	1450	#N/A	#N/A	#N/A
AT4G01026	Chr4:447052-448511[+]	PYL7, RCAR2	PYR1-like 7	Chr4:448522-453368[+]	4847	0.19377	0.200252	0.090432	0.307886	3.71045	Yes	Antisense	AT4G01030	CDS	Promoter	571	2692	#N/A	#N/A	#N/A
AT2G01290	Chr2:148919-150382[-]	RPI2	ribose-5-phosphate isomerase 2	Chr2:148579-148858[-]	280	0.0188443	0.124545	0.0166536	0.18967	0.356211	No	Antisense	AT2G01280	3' UTR	CDS	476	756	#N/A	#N/A	#N/A
AT5G57830	Chr5:23429291-23430996[-]	#N/A	Protein of unknown function, DUF593	Chr5:23428291-23429260[-]	970	0.0489565	0.101861	0.0769158	0.29565	0.920003	No	Antisense	AT5G57820	3' UTR	Promoter	56	716	#N/A	#N/A	#N/A
AT5G07350	Chr5:2320021-2325419[-]	Tudor1, AtTudor1, TSN1	TUDOR-SN protein 1	Chr5:2319171-2319980[-]	810	0.123768	0.322894	0.230273	1.0097	2.32012	No	Antisense	AT5G07340	Non-overlapped	CDS	0	479	#N/A	#N/A	#N/A
AT4G17550	Chr4:9777648-9779738[-]	#N/A	Major facilitator superfamily protein	Chr4:9775608-9777637[-]	2030	0.0571829	0.0744406	0.0574263	0.180513	1.07057	No	Antisense	AT4G17540	CDS	Promoter	188	1985	#N/A	#N/A	#N/A
AT5G13980	Chr5:4508496-4514666[+]	#N/A	Glycosyl hydrolase family 38 protein	Chr5:4514667-4517086[+]	2420	0.139542	0.220956	0.0385373	1.38255	2.60736	No	Antisense	AT5G13990	3' UTR	Promoter	99	2325	#N/A	#N/A	#N/A
AT1G05940	Chr1:1801162-1803984[-]	CAT9	cationic amino acid transporter 9	Chr1:1800572-1801141[-]	570	0.0555412	0.03059	0.0245422	0.745369	1.03147	No	Antisense	AT1G05930	Non-overlapped	CDS	0	362	#N/A	#N/A	#N/A
AT5G65990	Chr5:26394882-26396513[+]	#N/A	Transmembrane amino acid transporter family protein	Chr5:26396514-26397653[+]	1140	0.074055	0.112163	0.188157	0.312123	1.36761	No	Antisense	AT5G66000	3' UTR	Promoter	47	1034	#N/A	#N/A	#N/A
AT3G09260	Chr3:2840477-2843781[-]	PYK10, PSR3.1, BGLU23, LEB	Glycosyl hydrolase superfamily protein	Chr3:2838647-2840336[-]	1690	0.0999085	0.0687822	0.0469061	1.16271	1.84196	No	Antisense	AT3G09250	CDS	Promoter	138	1475	#N/A	#N/A	#N/A
AT5G19780	Chr5:6687074-6689171[+]	TUA5	tubulin alpha-5	Chr5:6689212-6690171[+]	960	0.0549627	0.0544884	0.0242866	0.204685	1.01161	No	Antisense	AT5G19790	3' UTR	Promoter	64	893	#N/A	#N/A	#N/A
AT4G02200	Chr4:972707-974692[+]	#N/A	Drought-responsive family protein	Chr4:974693-975662[+]	970	0.0543961	0.0419429	0.00480724	0.777451	1.00118	No	Antisense	AT4G02210	CDS	CDS	769	1739	#N/A	#N/A	#N/A
AT3G04890	Chr3:1347646-1349202[+]	#N/A	Uncharacterized conserved protein (DUF2358)	Chr3:1349203-1350162[+]	960	0.082444	0.12714	0.0340012	0.481287	1.49827	No	Antisense	AT3G04900	Non-overlapped	Promoter	0	627	#N/A	#N/A	#N/A
AT3G28740	Chr3:10788698-10790553[-]	CYP81D1	Cytochrome P450 superfamily protein	Chr3:10786438-10788377[-]	1940	0.0699636	0.134866	0.0850164	2.45879	1.2703	Yes	Antisense	AT3G28730	3' UTR	CDS	32	1972	#N/A	#N/A	#N/A
AT1G01520	Chr1:190596-192139[+]	#N/A	Homeodomain-like superfamily protein	Chr1:192250-193179[+]	930	0.147513	2.06236	0.646806	2.45551	2.64729	No	Antisense	AT1G01530	Non-overlapped	CDS	0	540	#N/A	#N/A	#N/A
AT1G19770	Chr1:6832347-6833837[+]	ATPUP14, PUP14	purine permease 14	Chr1:6833918-6834297[+]	380	0.0251258	0	0.0222049	0.455208	0.449951	No	Antisense	AT1G19780	Non-overlapped	CDS	0	380	#N/A	#N/A	#N/A
AT1G28680	Chr1:10078189-10080029[+]	#N/A	HXXXD-type acyl-transferase family protein	Chr1:10080040-10080519[+]	480	0.0549627	0.0363256	0.0388585	0.575332	0.973332	No	Antisense	AT1G28690	Non-overlapped	CDS	0	478	#N/A	#N/A	#N/A
AT3G17790	Chr3:6089605-6091231[+]	ATACP5, ATPAP17, PAP17	purple acid phosphatase 17	Chr3:6091242-6093141[+]	1900	0.191617	0.431318	0.292052	1.84199	3.3624	No	Antisense	AT3G17800	3' UTR	5' UTR	122	2022	#N/A	#N/A	#N/A
AT2G23940	Chr2:10183966-10185331[+]	#N/A	Protein of unknown function (DUF788)	Chr2:10185422-10186311[+]	890	0.053357	0.0848957	0.0419148	0.79363	0.926023	No	Antisense	AT2G23945	CDS	CDS	103	993	#N/A	#N/A	#N/A
AT1G77370	Chr1:29073843-29074796[+]	#N/A	Glutaredoxin family protein	Chr1:29074857-29076556[+]	1700	0.0496604	0.0786342	0.0630879	0.396745	0.861524	No	Antisense	AT1G77380	Non-overlapped	CDS	0	1669	#N/A	#N/A	#N/A
AT3G56650	Chr3:20984752-20986131[+]	#N/A	Mog1/PsbP/DUF1795-like photosystem II reaction center PsbP family protein	Chr3:20986132-20986941[+]	810	0.0586269	0.107631	0.0287841	0.314711	1.011	No	Antisense	AT3G56660	Non-overlapped	CDS	0	725	#N/A	#N/A	#N/A
AT1G10820	Chr1:3600910-3605076[-]	#N/A	Protein of unknown function (DUF3755)	Chr1:3599100-3600869[-]	1770	0.226558	0.436728	0.218661	1.91127	3.84068	No	Antisense	AT1G10810	Non-overlapped	Promoter	0	1599	#N/A	#N/A	#N/A
AT5G56880	Chr5:23009098-23009709[-]	#N/A	unknown protein; Has 9 Blast hits to 9 proteins in 5 species: Archae - 0; Bacteria - 0; Metazoa - 0; Fungi - 0; Plants - 9; Viruses - 0; Other Eukaryotes - 0 (source: NCBI BLink).	Chr5:23006978-23008997[-]	2020	0.0914231	0.112214	0.122347	0.255021	1.54105	No	Antisense	AT5G56870	Non-overlapped	CDS	0	1672	#N/A	#N/A	#N/A
AT3G62590	Chr3:23147918-23150352[-]	#N/A	alpha/beta-Hydrolases superfamily protein	Chr3:23146398-23147907[-]	1510	0.220142	0.82755	3.86629	1.06919	3.70241	No	Antisense	AT3G62580	3' UTR	Promoter	34	1114	#N/A	#N/A	#N/A
AT2G33450	Chr2:14173579-14174533[+]	#N/A	Ribosomal L28 family	Chr2:14174614-14175543[+]	930	0.0453885	0.0374974	0.005014	0.325498	0.762014	No	Antisense	AT2G33460	Non-overlapped	CDS	0	930	#N/A	#N/A	#N/A
AT5G64250	Chr5:25697354-25699212[-]	#N/A	Aldolase-type TIM barrel family protein	Chr5:25695604-25697343[-]	1740	0.303242	1.27265	1.5463	2.38068	5.08652	No	Antisense	AT5G64240	3' UTR	Promoter	63	1787	#N/A	#N/A	#N/A
AT3G19010	Chr3:6556197-6558009[-]	#N/A	2-oxoglutarate (2OG) and Fe(II)-dependent oxygenase superfamily protein	Chr3:6555148-6556156[-]	1009	0.0620755	0.111114	0.0411443	1.55418	1.03445	No	Antisense	AT3G19002	Non-overlapped	Other noncoding gene	0	510	#N/A	#N/A	#N/A
AT4G37480	Chr4:17619261-17621596[+]	#N/A	Chaperone DnaJ-domain superfamily protein	Chr4:17622037-17623386[+]	1350	0.0312677	0.0904103	0.0449031	0.456332	0.521054	No	Antisense	AT4G37490	Non-overlapped	CDS	0	1350	#N/A	#N/A	#N/A
AT3G17800	Chr3:6091110-6093151[-]	#N/A	Protein of unknown function (DUF760)	Chr3:6089370-6091089[-]	1720	0.118641	0.323276	0.20418	1.36068	1.96931	No	Antisense	AT3G17790	3' UTR	Promoter	122	1607	#N/A	#N/A	#N/A
AT4G19450	Chr4:10606453-10609335[+]	#N/A	Major facilitator superfamily protein	Chr4:10609346-10610285[+]	940	0.0617453	0.111295	0.0843312	0.587573	1.01638	Yes	Antisense	AT4G19452	Non-overlapped	Other noncoding gene	0	646	#N/A	#N/A	#N/A
AT1G34430	Chr1:12587752-12590192[-]	EMB3003	2-oxoacid dehydrogenases acyltransferase family protein	Chr1:12584262-12587741[-]	3480	0.0773268	0.220459	0.230471	1.0591	1.2671	No	Antisense	AT1G34420	Non-overlapped	Promoter	0	2984	#N/A	#N/A	#N/A
AT2G39200	Chr2:16356148-16359813[-]	MLO12, ATMLO12	Seven transmembrane MLO family protein	Chr2:16354478-16356127[-]	1650	0.0797157	0.188161	0.0905766	1.35634	1.29536	No	Antisense	AT2G39190	Non-overlapped	CDS	0	1486	#N/A	#N/A	#N/A
AT4G09760	Chr4:6148758-6151399[-]	#N/A	Protein kinase superfamily protein	Chr4:6148538-6148737[-]	200	0.0263821	0	0	0.0265538	0.419954	No	Antisense	AT4G09750	3' UTR	CDS	57	257	#N/A	#N/A	#N/A
AT1G11380	Chr1:3832623-3834191[+]	#N/A	PLAC8 family protein	Chr1:3834332-3834541[+]	210	0.0251258	0.0276766	0.0222049	0.278182	0.399957	No	Antisense	AT1G11390	Non-overlapped	3' UTR	0	83	#N/A	#N/A	#N/A
AT1G76450	Chr1:28684551-28686244[+]	#N/A	Photosystem II reaction center PsbP family protein	Chr1:28686575-28687874[+]	1300	0.0202939	0.00447084	0.00717387	0.330901	0.323042	No	Antisense	AT1G76460	3' UTR	CDS	64	1364	#N/A	#N/A	#N/A
AT4G34860	Chr4:16609746-16612907[-]	#N/A	Plant neutral invertase family protein	Chr4:16608846-16609745[-]	900	0.0644896	0.154989	0.103623	0.230133	1.00906	No	Antisense	AT4G34850	3' UTR	CDS	84	984	#N/A	#N/A	#N/A
AT1G58848	Chr1:21791783-21797050[+]	#N/A	Disease resistance protein (CC-NBS-LRR class) family	Chr1:21797111-21801920[+]	4810	0.432206	1.18779	0.358694	4.5975	6.75441	No	Antisense	AT1G58889	Non-overlapped	Other noncoding gene	0	4552	#N/A	#N/A	#N/A
AT1G06530	Chr1:2001594-2002596[+]	#N/A	Tropomyosin-related	Chr1:2002757-2003556[+]	800	0.0197866	0.0508558	0.0233151	0.179238	0.308404	No	Antisense	AT1G06540	Non-overlapped	Promoter	0	517	#N/A	#N/A	#N/A
AT1G17110	Chr1:5845660-5850934[-]	UBP15	ubiquitin-specific protease 15	Chr1:5844400-5845629[-]	1230	0.457871	0.840592	0.2582	2.69927	7.06721	No	Antisense	AT1G17100	3' UTR	Promoter	2	956	#N/A	#N/A	#N/A
AT1G66940	Chr1:24973028-24974791[-]	#N/A	protein kinase-related	Chr1:24972158-24972527[-]	370	0.0285212	0.0314167	0	0.172241	0.439817	No	Antisense	AT1G66930	CDS	CDS	42	412	#N/A	#N/A	#N/A
AT4G39230	Chr4:18265885-18267829[-]	#N/A	NmrA-like negative transcriptional regulator family protein	Chr4:18265125-18265794[-]	670	0.0827673	0.0911701	0.0640022	0.916366	1.25575	No	Antisense	AT4G39220	Non-overlapped	CDS	0	647	#N/A	#N/A	#N/A
AT3G51980	Chr3:19285572-19287552[-]	#N/A	ARM repeat superfamily protein	Chr3:19284147-19285521[-]	1375	0.126634	0.300115	0.288259	0.687501	1.91652	No	Antisense	AT3G51970	3' UTR	Promoter	11	1194	#N/A	#N/A	#N/A
AT5G44530	Chr5:17937689-17941292[+]	#N/A	Subtilase family protein	Chr5:17941323-17941822[+]	500	0.200504	0.406846	0.44765	0.754127	3.01317	No	Antisense	AT5G44540	CDS	Promoter	6	330	#N/A	#N/A	#N/A
AT5G23610	Chr5:7957340-7960272[-]	#N/A	INVOLVED IN: biological_process unknown; EXPRESSED IN: 24 plant structures; EXPRESSED DURING: 15 growth stages; BEST Arabidopsis thaliana protein match is: SWITCH1 (TAIR:AT5G51330.1); Has 173 Blast hits to 168 proteins in 34 species: Archae - 3; Bacteria - 10; Metazoa - 6; Fungi - 2; Plants - 115; Viruses - 0; Other Eukaryotes - 37 (source: NCBI BLink).	Chr5:7955641-7957319[-]	1679	0.135132	0.159235	0.130531	0.857186	2.01973	Yes	Antisense	AT5G23600	Non-overlapped	Promoter	0	639	#N/A	#N/A	#N/A
AT1G14810	Chr1:5102424-5104695[-]	#N/A	semialdehyde dehydrogenase family protein	Chr1:5102164-5102403[-]	240	0.0659552	0.0726511	0.077717	0.442563	0.984268	No	Antisense	AT1G14800	CDS	CDS	135	375	#N/A	#N/A	#N/A
AT5G57040	Chr5:23083898-23085246[-]	#N/A	Lactoylglutathione lyase / glyoxalase I family protein	Chr5:23083568-23083877[-]	310	0.0510621	0.0749947	0.15042	0.171315	0.762014	No	Antisense	AT5G57035	3' UTR	CDS	91	401	#N/A	#N/A	#N/A
AT2G16630	Chr2:7209239-7211037[+]	#N/A	Pollen Ole e 1 allergen and extensin family protein	Chr2:7211068-7211437[+]	370	0.0285212	0.0471251	0.050411	0.0574136	0.425629	No	Antisense	AT2G16640	Non-overlapped	3' UTR	0	326	#N/A	#N/A	#N/A
AT5G16650	Chr5:5463177-5465331[-]	#N/A	Chaperone DnaJ-domain superfamily protein	Chr5:5462927-5463136[-]	210	0.0251258	0	0	0.101157	0.374959	No	Antisense	AT5G16640	Non-overlapped	3' UTR	0	91	#N/A	#N/A	#N/A
AT5G64240	Chr5:25695620-25697416[+]	AtMC3, MC3	metacaspase 3	Chr5:25697437-25699256[+]	1820	0.0927722	0.076643	0.0538041	0.30639	1.36716	No	Antisense	AT5G64250	3' UTR	Promoter	63	1839	#N/A	#N/A	#N/A
AT5G20020	Chr5:6762724-6764671[+]	RAN2	RAS-related GTP-binding nuclear protein 2	Chr5:6764682-6764941[+]	260	0.0608817	0.178834	0.0179347	0.490224	0.888365	No	Antisense	AT5G20030	Non-overlapped	3' UTR	0	215	#N/A	#N/A	#N/A
AT1G02170	Chr1:411779-413554[+]	LOL3, ATMCPB1, MCP1B, ATMC1, MC1	metacaspase 1	Chr1:413575-413854[+]	280	0.056533	0.16606	0.0666146	0.891448	0.82491	No	Antisense	AT1G02180	3' UTR	CDS	33	313	#N/A	#N/A	#N/A
AT5G24800	Chr5:8515200-8516669[+]	ATBZIP9, BZO2H2, BZIP9	basic leucine zipper 9	Chr5:8516750-8518169[+]	1420	0.0557368	0.13507	0.0656763	0.269278	0.813292	No	Antisense	AT5G24810	3' UTR	CDS	35	1455	#N/A	#N/A	#N/A
AT5G34930	Chr5:13233374-13235567[+]	#N/A	arogenate dehydrogenase	Chr5:13235768-13236697[+]	930	0.0340414	0.0687452	0.070196	0.285524	0.49672	No	Antisense	AT5G34940	Non-overlapped	CDS	0	869	#N/A	#N/A	#N/A
AT1G55270	Chr1:20617954-20620136[-]	#N/A	Galactose oxidase/kelch repeat superfamily protein	Chr1:20617004-20617943[-]	940	0.295026	0.481216	0.461288	1.77596	4.22777	No	Antisense	AT1G55265	3' UTR	Promoter	52	683	#N/A	#N/A	#N/A
AT4G25170	Chr4:12909575-12911580[+]	#N/A	Uncharacterised conserved protein (UCP012943)	Chr4:12911591-12911820[+]	230	0.0688228	0.0758099	0.020274	0.531076	0.981415	No	Antisense	AT4G25180	3' UTR	CDS	31	261	#N/A	#N/A	#N/A
AT5G65630	Chr5:26225832-26228449[-]	GTE7	global transcription factor group E7	Chr5:26221982-26225811[-]	3830	0.071638	0.0956036	0.0572224	0.897143	1.00329	No	Antisense	AT5G65620	3' UTR	CDS	72	3902	#N/A	#N/A	#N/A
AT1G80750	Chr1:30348801-30350564[+]	#N/A	Ribosomal protein L30/L7 family protein	Chr1:30350625-30351004[+]	380	0.0277706	0.12236	0	0.377343	0.3868	No	Antisense	AT1G80760	3' UTR	CDS	26	406	#N/A	#N/A	#N/A
AT5G35680	Chr5:13857921-13859013[-]	#N/A	Nucleic acid-binding, OB-fold-like protein	Chr5:13855541-13857900[-]	2360	0.118496	0.270903	0.179803	0.607586	1.64823	No	Antisense	AT5G35670	3' UTR	Promoter	139	1937	#N/A	#N/A	#N/A
AT5G13200	Chr5:4207004-4208289[+]	#N/A	GRAM domain family protein	Chr5:4208290-4208719[+]	430	0.147249	0.932638	1.31215	1.58088	2.02652	No	Antisense	AT5G13205	Non-overlapped	Other noncoding gene	0	199	#N/A	#N/A	#N/A
AT1G74360	Chr1:27954231-27958114[+]	#N/A	Leucine-rich repeat protein kinase family protein	Chr1:27958125-27959414[+]	1290	0.0736244	0.0675825	0.0506064	0.535192	1.01326	No	Antisense	AT1G74370	3' UTR	Promoter	29	1271	#N/A	#N/A	#N/A
AT4G23810	Chr4:12392370-12393982[-]	WRKY53, ATWRKY53	WRKY family transcription factor	Chr4:12390060-12392359[-]	2300	0.115965	0.134125	0.0307452	2.07178	1.5806	No	Antisense	AT4G23800	CDS	Promoter	341	2534	#N/A	#N/A	#N/A
AT1G79890	Chr1:30048655-30052203[+]	#N/A	RAD3-like DNA-binding helicase protein	Chr1:30052424-30052733[+]	310	0.0680828	0.112492	0.060168	0.513944	0.897483	No	Antisense	AT1G79900	Non-overlapped	CDS	0	310	#N/A	#N/A	#N/A
AT2G31820	Chr2:13530350-13532562[+]	#N/A	Ankyrin repeat family protein	Chr2:13532763-13534202[+]	1440	0.049083	0.0675825	0.0542211	0.716334	0.647023	No	Antisense	AT2G31830	Non-overlapped	CDS	0	1440	#N/A	#N/A	#N/A
AT3G45630	Chr3:16748174-16753833[-]	#N/A	RNA binding (RRM/RBD/RNP motifs) family protein	Chr3:16747694-16748123[-]	430	0.049083	0.108132	0.0433769	0.370518	0.647023	No	Antisense	AT3G45620	Non-overlapped	CDS	0	430	#N/A	#N/A	#N/A
AT1G07705	Chr1:2381615-2386092[+]	#N/A	NOT2 / NOT3 / NOT5 family	Chr1:2386093-2388362[+]	2270	0.113896	0.302126	0.281424	1.06449	1.49158	No	Antisense	AT1G07710	Non-overlapped	Promoter	0	1712	#N/A	#N/A	#N/A
AT5G65925	Chr5:26369045-26369751[+]	#N/A	unknown protein; BEST Arabidopsis thaliana protein match is: unknown protein (TAIR:AT3G49820.1); Has 45 Blast hits to 45 proteins in 6 species: Archae - 0; Bacteria - 0; Metazoa - 0; Fungi - 0; Plants - 45; Viruses - 0; Other Eukaryotes - 0 (source: NCBI BLink).	Chr5:26369892-26370171[+]	280	0.056533	0	0.0333073	0.531076	0.73117	No	Antisense	AT5G65930	Non-overlapped	3' UTR	0	280	#N/A	#N/A	#N/A
AT1G72610	Chr1:27339114-27340044[-]	GLP1, ATGER1, GER1	germin-like protein 1	Chr1:27337714-27339103[-]	1390	0.106288	0.121259	0.0738032	0.699186	1.37089	No	Antisense	AT1G72600	3' UTR	Promoter	931	1910	#N/A	#N/A	#N/A
AT5G03200	Chr5:760319-761803[-]	#N/A	RING/U-box superfamily protein	Chr5:757879-760298[-]	2420	0.19405	0.677277	0.366105	1.43961	2.45118	Yes	Antisense	AT5G03190	3' UTR	Promoter	64	1989	#N/A	#N/A	#N/A
AT4G28230	Chr4:13995779-13997307[-]	#N/A	unknown protein; Has 444 Blast hits to 358 proteins in 107 species: Archae - 0; Bacteria - 20; Metazoa - 179; Fungi - 26; Plants - 38; Viruses - 2; Other Eukaryotes - 179 (source: NCBI BLink).	Chr4:13995519-13995768[-]	250	0.0844227	0.0464967	0.0186521	0.297402	1.04989	No	Antisense	AT4G28220	3' UTR	CDS	53	303	#N/A	#N/A	#N/A
AT4G27700	Chr4:13826374-13827823[-]	#N/A	Rhodanese/Cell cycle control phosphatase superfamily protein	Chr4:13826104-13826303[-]	200	0.0527642	0.0871814	0.0233151	0.371753	0.656179	No	Antisense	AT4G27690	3' UTR	CDS	22	222	#N/A	#N/A	#N/A
AT3G47470	Chr3:17493372-17495033[-]	LHCA4, CAB4	light-harvesting chlorophyll-protein complex I subunit A4	Chr3:17493142-17493351[-]	210	0.0502516	0.0830299	0.0444097	0.404629	0.624932	No	Antisense	AT3G47460	3' UTR	CDS	24	234	#N/A	#N/A	#N/A
AT5G24810	Chr5:8516635-8522767[-]	#N/A	ABC1 family protein	Chr5:8514905-8516624[-]	1720	0.0981659	0.0709616	0.0623543	0.710159	1.20554	No	Antisense	AT5G24800	3' UTR	Promoter	35	1460	#N/A	#N/A	#N/A
AT3G15518	Chr3:5249112-5249754[+]	#N/A	unknown protein; FUNCTIONS IN: molecular_function unknown; INVOLVED IN: biological_process unknown; LOCATED IN: cellular_component unknown; Has 30201 Blast hits to 17322 proteins in 780 species: Archae - 12; Bacteria - 1396; Metazoa - 17338; Fungi - 3422; Plants - 5037; Viruses - 0; Other Eukaryotes - 2996 (source: NCBI BLink).	Chr3:5249775-5250044[+]	270	0.0781692	0.279841	0.0345409	1.00314	0.952674	No	Antisense	AT3G15520	CDS	CDS	156	426	#N/A	#N/A	#N/A
AT1G64720	Chr1:24046553-24048622[-]	CP5	Polyketide cyclase/dehydrase and lipid transport superfamily protein	Chr1:24044463-24045742[-]	1280	0.44932	0.45407	0.20765	3.20305	5.42988	No	Antisense	AT1G64710	Non-overlapped	Promoter	0	1198	#N/A	#N/A	#N/A
AT5G19850	Chr5:6709734-6711673[-]	#N/A	alpha/beta-Hydrolases superfamily protein	Chr5:6709134-6709723[-]	590	0.107317	0.118212	0.0790342	1.29618	1.28122	No	Antisense	AT5G19840	3' UTR	3' UTR	59	649	#N/A	#N/A	#N/A
AT1G24600	Chr1:8720309-8720721[+]	#N/A	unknown protein; BEST Arabidopsis thaliana protein match is: unknown protein (TAIR:AT1G67920.1); Has 18 Blast hits to 18 proteins in 5 species: Archae - 0; Bacteria - 0; Metazoa - 0; Fungi - 0; Plants - 18; Viruses - 0; Other Eukaryotes - 0 (source: NCBI BLink).	Chr1:8720722-8721091[+]	370	0.0855635	0.125667	0.655343	0.186594	1.00732	No	Antisense	AT1G24610	3' UTR	CDS	71	441	#N/A	#N/A	#N/A
AT4G01940	Chr4:841989-843459[-]	NFU1, AtCNFU1	NFU domain protein 1	Chr4:840761-841768[-]	1008	0.0523454	0.0461277	0.0508861	0.126447	0.614517	No	Antisense	AT4G01935	CDS	Promoter	376	1088	#N/A	#N/A	#N/A
AT5G41910	Chr5:16778055-16779274[-]	MED10A	Mediator complex, subunit Med10	Chr5:16777145-16777874[-]	730	0.0361398	0.0875795	0.0830401	0.2037	0.424269	No	Antisense	AT5G41908	Non-overlapped	Promoter	0	156	#N/A	#N/A	#N/A
AT3G17670	Chr3:6040820-6042588[+]	#N/A	tetratricopeptide repeat (TPR)-containing protein	Chr3:6042589-6042888[+]	300	0.0879403	0.0968682	0.077717	0.672696	1.01489	No	Antisense	AT3G17675	CDS	Promoter	345	607	#N/A	#N/A	#N/A
AT4G09000	Chr4:5775210-5777481[+]	GRF1, GF14 CHI	general regulatory factor 1	Chr4:5777522-5779611[+]	2090	0.131279	0.100113	0.0312355	1.52716	1.51455	No	Antisense	AT4G09010	3' UTR	Promoter	85	2026	#N/A	#N/A	#N/A
AT2G47170	Chr2:19366623-19368840[+]	ARF1A1C	Ras-related small GTP-binding family protein	Chr2:19368841-19370920[+]	2080	0.0989328	0.0670626	0.0291439	0.960021	1.13317	No	Antisense	AT2G47180	3' UTR	Promoter	43	1644	#N/A	#N/A	#N/A
AT4G21770	Chr4:11563517-11566357[-]	#N/A	Pseudouridine synthase family protein	Chr4:11562917-11563326[-]	410	0.0772159	0.17011	0.113732	0.621747	0.883441	No	Antisense	AT4G21760	CDS	CDS	434	844	#N/A	#N/A	#N/A
AT1G50740	Chr1:18807672-18809004[+]	#N/A	Transmembrane proteins 14C	Chr1:18809015-18812604[+]	3590	0.367439	0.294652	0.307837	5.51934	4.19516	Yes	Antisense	AT1G50750	Non-overlapped	Promoter	0	3107	#N/A	#N/A	#N/A
AT1G64670	Chr1:24030820-24033556[-]	BDG1	alpha/beta-Hydrolases superfamily protein	Chr1:24028840-24030799[-]	1960	0.164215	0.441838	0.41872	0.363082	1.86676	No	Antisense	AT1G64660	Non-overlapped	Promoter	0	1863	#N/A	#N/A	#N/A
AT1G43910	Chr1:16655884-16657658[-]	#N/A	P-loop containing nucleoside triphosphate hydrolases superfamily protein	Chr1:16655564-16655863[-]	300	0.0879403	0.154989	0.077717	0.177025	0.997392	No	Antisense	AT1G43900	3' UTR	CDS	45	345	#N/A	#N/A	#N/A
AT3G04550	Chr3:1225922-1227436[+]	#N/A	unknown protein; INVOLVED IN: biological_process unknown; LOCATED IN: chloroplast stroma, chloroplast; EXPRESSED IN: 22 plant structures; EXPRESSED DURING: 13 growth stages; BEST Arabidopsis thaliana protein match is: unknown protein (TAIR:AT5G28500.1); Has 110 Blast hits to 110 proteins in 51 species: Archae - 0; Bacteria - 67; Metazoa - 1; Fungi - 0; Plants - 41; Viruses - 0; Other Eukaryotes -…	Chr3:1227457-1229506[+]	2050	0.131267	0.243824	0.136479	1.29013	1.47752	No	Antisense	AT3G04560	3' UTR	Promoter	77	2029	#N/A	#N/A	#N/A
AT2G24690	Chr2:10499551-10503140[-]	#N/A	Transcriptional factor B3 family protein	Chr2:10498332-10499300[-]	969	0.130685	0.281907	0.120305	1.10709	1.46269	No	Antisense	AT2G24683	Non-overlapped	Promoter	0	135	#N/A	#N/A	#N/A
AT4G30620	Chr4:14948586-14950072[-]	#N/A	Uncharacterised BCR, YbaB family COG0718	Chr4:14946776-14948505[-]	1730	0.0762488	0.258688	0.1752	0.512657	0.849619	Yes	Antisense	AT4G30610	3' UTR	CDS	20	1750	#N/A	#N/A	#N/A
AT3G53090	Chr3:19679208-19685360[+]	UPL7	ubiquitin-protein ligase 7	Chr3:19685701-19687130[+]	1430	0.0590368	0.081288	0.0586953	0.389951	0.657096	No	Antisense	AT3G53100	CDS	Promoter	675	1649	#N/A	#N/A	#N/A
AT1G19715	Chr1:6816702-6819542[-]	#N/A	Mannose-binding lectin superfamily protein	Chr1:6816042-6816681[-]	640	0.0906884	0.0908139	0.0364298	0.730229	1.00887	No	Antisense	AT1G19710	CDS	CDS	175	815	#N/A	#N/A	#N/A
AT4G10030	Chr4:6270241-6273241[-]	#N/A	alpha/beta-Hydrolases superfamily protein	Chr4:6268651-6270220[-]	1570	0.0974625	0.199906	0.0623716	0.544606	1.08332	No	Antisense	AT4G10020	3' UTR	CDS	194	1764	#N/A	#N/A	#N/A
AT4G27040	Chr4:13572885-13575538[-]	VPS22	EAP30/Vps36 family protein	Chr4:13571475-13572814[-]	1340	0.452827	1.0323	0.358426	3.46388	5.01438	No	Antisense	AT4G27030	CDS	Promoter	186	1080	#N/A	#N/A	#N/A
AT5G55700	Chr5:22551747-22554964[+]	BMY6, BAM4	beta-amylase 4	Chr5:22554965-22555954[+]	990	0.159891	0.152641	0.080072	0.681279	1.75511	No	Antisense	AT5G55710	3' UTR	Promoter	87	773	#N/A	#N/A	#N/A
AT4G39220	Chr4:18263617-18265771[+]	ATRER1A	Rer1 family protein	Chr4:18265772-18266001[+]	230	0.0917638	0	0	0.738888	1.00424	No	Antisense	AT4G39230	Non-overlapped	3' UTR	0	117	#N/A	#N/A	#N/A
AT1G24040	Chr1:8503777-8506803[-]	#N/A	Acyl-CoA N-acyltransferases (NAT) superfamily protein	Chr1:8502457-8503606[-]	1150	0.197866	0.363256	0.14307	1.2613	2.15346	No	Antisense	AT1G24030	CDS	Promoter	1684	2057	#N/A	#N/A	#N/A
AT3G61620	Chr3:22801221-22804104[-]	RRP41	3'-5'-exoribonuclease family protein	Chr3:22800861-22801200[-]	340	0.0931133	0.102566	0.054859	0.921572	1.00357	No	Antisense	AT3G61610	Non-overlapped	CDS	0	340	#N/A	#N/A	#N/A
AT5G20900	Chr5:7090704-7092539[+]	JAZ12, TIFY3B	jasmonate-zim-domain protein 12	Chr5:7092550-7092839[+]	290	0.163751	0.280584	0.289429	1.37347	1.71964	No	Antisense	AT5G20910	3' UTR	CDS	28	318	#N/A	#N/A	#N/A
AT1G30210	Chr1:10627185-10630610[-]	TCP24, ATTCP24	TEOSINTE BRANCHED 1, cycloidea, and PCF family 24	Chr1:10624975-10627094[-]	2120	0.0871107	0.0383817	0.0153968	0.744007	0.913698	No	Antisense	AT1G30200	Non-overlapped	Promoter	0	2066	#N/A	#N/A	#N/A
AT2G32800	Chr2:13916452-13919179[+]	AP4.3A	protein kinase family protein	Chr2:13919180-13919889[+]	710	0.0966105	0.0327442	0.0197029	0.142119	1.01292	No	Antisense	AT2G32810	3' UTR	CDS	53	763	#N/A	#N/A	#N/A
AT1G60190	Chr1:22198403-22200678[+]	#N/A	ARM repeat superfamily protein	Chr1:22200679-22205518[+]	4840	0.19078	0.220956	0.120429	0.811975	1.99674	No	Antisense	AT1G60200	Non-overlapped	Promoter	0	4556	#N/A	#N/A	#N/A
AT5G44080	Chr5:17738652-17739873[-]	#N/A	Basic-leucine zipper (bZIP) transcription factor family protein	Chr5:17737742-17738621[-]	880	0.16189	0.303814	0.270243	0.627635	1.68817	No	Antisense	AT5G44070	Non-overlapped	3' UTR	0	118	#N/A	#N/A	#N/A
AT2G17695	Chr2:7684112-7685187[-]	#N/A	FUNCTIONS IN: molecular_function unknown; INVOLVED IN: biological_process unknown; LOCATED IN: chloroplast; CONTAINS InterPro DOMAIN/s: Domain of unknown function DUF1990 (InterPro:IPR018960); Has 259 Blast hits to 259 proteins in 120 species: Archae - 0; Bacteria - 197; Metazoa - 0; Fungi - 0; Plants - 57; Viruses - 0; Other Eukaryotes - 5 (source: NCBI BLink).	Chr2:7682722-7684001[-]	1280	0.118192	0.209235	0.108182	1.11738	1.23047	No	Antisense	AT2G17690	Non-overlapped	5' UTR	0	1280	#N/A	#N/A	#N/A
AT3G10620	Chr3:3320263-3321724[+]	ATNUDX26, NUDX26	nudix hydrolase homolog 26	Chr3:3321735-3323364[+]	1630	0.100349	0.35657	0.248885	0.775435	1.04344	No	Antisense	AT3G10630	CDS	Promoter	262	1739	#N/A	#N/A	#N/A
AT5G15440	Chr5:5012061-5014281[+]	EDL1	EID1-like 1	Chr5:5014282-5014891[+]	610	0.198947	0.228672	0.175819	0.618137	2.04814	No	Antisense	AT5G15450	3' UTR	CDS	70	680	#N/A	#N/A	#N/A
AT5G51010	Chr5:20744566-20745703[+]	#N/A	Rubredoxin-like superfamily protein	Chr5:20745714-20747293[+]	1580	0.0969138	0.130476	0.0285491	1.1055	0.99632	No	Antisense	AT5G51020	CDS	Promoter	355	1919	#N/A	#N/A	#N/A
AT1G62600	Chr1:23179477-23181519[+]	#N/A	Flavin-binding monooxygenase family protein	Chr1:23181550-23182629[+]	1080	0.195227	0.238296	0.20051	1.05684	1.98428	Yes	Antisense	AT1G62610	3' UTR	CDS	57	1137	#N/A	#N/A	#N/A
AT1G17130	Chr1:5854148-5856697[+]	#N/A	Family of unknown function (DUF572)	Chr1:5856708-5858697[+]	1990	0.159088	0.140191	0.0445213	0.752579	1.60912	Yes	Antisense	AT1G17140	3' UTR	Promoter	125	1968	#N/A	#N/A	#N/A
AT5G57190	Chr5:23171531-23175364[-]	PSD2	phosphatidylserine decarboxylase 2	Chr5:23170941-23171400[-]	460	0.0688228	0.17689	0.070959	0.658072	0.684708	No	Antisense	AT5G57181	Non-overlapped	Promoter	0	99	#N/A	#N/A	#N/A
AT4G36850	Chr4:17353291-17355891[-]	#N/A	PQ-loop repeat family protein / transmembrane family protein	Chr4:17351471-17352930[-]	1460	0.137331	0.0597133	0.0574893	0.858451	1.36269	No	Antisense	AT4G36840	Non-overlapped	5' UTR	0	1460	#N/A	#N/A	#N/A
AT4G36760	Chr4:17326617-17330208[+]	ATAPP1, APP1	aminopeptidase P1	Chr4:17330209-17331988[+]	1780	0.225285	0.675901	0.971899	1.99899	2.22069	No	Antisense	AT4G36770	3' UTR	Promoter	63	1479	#N/A	#N/A	#N/A
AT4G02405	Chr4:1057854-1059671[-]	#N/A	S-adenosyl-L-methionine-dependent methyltransferases superfamily protein	Chr4:1057114-1057713[-]	600	0.0703522	0.0774946	0.0310868	0.380604	0.691175	No	Antisense	AT4G02400	CDS	CDS	145	745	#N/A	#N/A	#N/A
AT4G38560	Chr4:18029196-18031333[+]	#N/A	Arabidopsis phospholipase-like protein (PEARLI 4) family	Chr4:18031344-18032043[+]	700	0.105528	0.368099	0.264238	1.17722	1.02364	No	Antisense	AT4G38570	3' UTR	CDS	55	755	#N/A	#N/A	#N/A
AT1G49970	Chr1:18501570-18504609[-]	CLPR1, NCLPP5, SVR2	CLP protease proteolytic subunit 1	Chr1:18501070-18501559[-]	490	0.107682	0.355842	0.41872	0.910415	1.02846	No	Antisense	AT1G49960	CDS	CDS	317	807	#N/A	#N/A	#N/A
AT1G30880	Chr1:10993195-10994125[-]	#N/A	unknown protein; Has 24 Blast hits to 24 proteins in 8 species: Archae - 0; Bacteria - 0; Metazoa - 2; Fungi - 0; Plants - 22; Viruses - 0; Other Eukaryotes - 0 (source: NCBI BLink).	Chr1:10992135-10993164[-]	1030	0.0614728	0.0507853	0.0407448	0.252648	0.586101	No	Antisense	AT1G30870	Non-overlapped	CDS	0	889	#N/A	#N/A	#N/A
AT1G22510	Chr1:7950818-7952832[-]	#N/A	RING/U-box protein with domain of unknown function (DUF 1232)	Chr1:7949248-7950807[-]	1560	0.186028	0.197462	0.0508149	1.27662	1.76663	No	Antisense	AT1G22500	3' UTR	Promoter	83	1415	#N/A	#N/A	#N/A
AT5G65480	Chr5:26176021-26177917[+]	#N/A	unknown protein; FUNCTIONS IN: molecular_function unknown; INVOLVED IN: biological_process unknown; LOCATED IN: chloroplast; EXPRESSED IN: 24 plant structures; EXPRESSED DURING: 15 growth stages; BEST Arabidopsis thaliana protein match is: unknown protein (TAIR:AT4G38060.2); Has 1807 Blast hits to 1807 proteins in 277 species: Archae - 0; Bacteria - 0; Metazoa - 736; Fungi - 347; Plants - 385; Vi…	Chr5:26177958-26178257[+]	300	0.105528	0.0387473	0.0466302	0.531076	0.997392	No	Antisense	AT5G65490	3' UTR	CDS	118	418	#N/A	#N/A	#N/A
AT3G07230	Chr3:2299774-2300267[+]	#N/A	wound-responsive protein-related	Chr3:2300368-2300917[+]	550	0.0827673	0.148151	0.0914317	0.406117	0.782268	No	Antisense	AT3G07250	Non-overlapped	CDS	0	339	#N/A	#N/A	#N/A
AT1G75220	Chr1:28229157-28232831[-]	#N/A	Major facilitator superfamily protein	Chr1:28228687-28229106[-]	420	0.0703522	0	0	0.885126	0.664928	No	Antisense	AT1G75210	Non-overlapped	CDS	0	289	#N/A	#N/A	#N/A
AT4G34120	Chr4:16341009-16343118[+]	LEJ1, CDCP1	Cystathionine beta-synthase (CBS) family protein	Chr4:16343179-16347348[+]	4170	0.832586	1.27113	1.11935	5.17321	7.83764	No	Antisense	AT4G34135	Non-overlapped	Promoter	0	1853	#N/A	#N/A	#N/A
AT3G09870	Chr3:3027424-3027957[-]	#N/A	SAUR-like auxin-responsive protein family	Chr3:3026634-3027423[-]	790	0.106864	0.0294283	0.0118051	0.0672248	1.00337	No	Antisense	AT3G09860	Non-overlapped	CDS	0	601	#N/A	#N/A	#N/A
AT2G26170	Chr2:11140809-11143360[+]	CYP711A1, MAX1	cytochrome P450, family 711, subfamily A, polypeptide 1	Chr2:11143511-11145360[+]	1850	0.167455	0.313227	0.198248	2.013	1.56226	No	Antisense	AT2G26180	3' UTR	Promoter	71	1664	#N/A	#N/A	#N/A
AT1G72710	Chr1:27372271-27376584[+]	CKL2	casein kinase 1-like protein 2	Chr1:27376625-27377584[+]	960	0.197866	0.356651	0.328531	1.30355	1.84327	No	Antisense	AT1G72720	Non-overlapped	Promoter	0	641	#N/A	#N/A	#N/A
AT5G58650	Chr5:23699708-23700226[-]	PSY1	plant peptide containing sulfated tyrosine 1	Chr5:23698488-23699627[-]	1140	0.111082	0.356883	0.327229	0.479831	1.03147	No	Antisense	AT5G58640	3' UTR	CDS	60	1200	#N/A	#N/A	#N/A
AT2G45340	Chr2:18691722-18694725[+]	#N/A	Leucine-rich repeat protein kinase family protein	Chr2:18694746-18694955[+]	210	0.0753774	0.415149	0.288663	0.480497	0.699924	No	Antisense	AT2G45350	Non-overlapped	CDS	0	140	#N/A	#N/A	#N/A
AT3G59970	Chr3:22151195-22154483[+]	MTHFR1	methylenetetrahydrofolate reductase 1	Chr3:22154544-22158803[+]	4260	0.339375	0.323349	0.256138	0.668208	3.11269	Yes	Antisense	AT3G59990	Non-overlapped	5' UTR	0	3099	#N/A	#N/A	#N/A
AT4G37610	Chr4:17670481-17672353[-]	BT5	BTB and TAZ domain protein 5	Chr4:17670131-17670390[-]	260	0.10147	0.0223542	0.0179347	0.469798	0.928745	No	Antisense	AT4G37608	3' UTR	CDS	151	411	#N/A	#N/A	#N/A
AT3G63310	Chr3:23387856-23388985[-]	BIL4	Bax inhibitor-1 family protein	Chr3:23384966-23387705[-]	2740	0.138853	0.24472	0.319049	0.880467	1.22947	No	Antisense	AT3G63300	Non-overlapped	Promoter	0	2718	#N/A	#N/A	#N/A
AT1G75440	Chr1:28313487-28315122[+]	UBC16	ubiquitin-conjugating enzyme 16	Chr1:28315743-28316272[+]	530	0.248888	0.800533	0.739044	2.47501	2.17901	No	Antisense	AT1G75450	3' UTR	CDS	665	1195	#N/A	#N/A	#N/A
AT3G60318	Chr3:22291597-22291737[+]	#N/A	unknown protein; Has 30201 Blast hits to 17322 proteins in 780 species: Archae - 12; Bacteria - 1396; Metazoa - 17338; Fungi - 3422; Plants - 5037; Viruses - 0; Other Eukaryotes - 2996 (source: NCBI BLink).	Chr3:22291748-22291977[+]	230	0.114705	0.02527	0.020274	0.484895	1.00424	No	Antisense	AT3G60320	Non-overlapped	3' UTR	0	92	#N/A	#N/A	#N/A
AT1G06470	Chr1:1969729-1973767[+]	#N/A	Nucleotide/sugar transporter family protein	Chr1:1973828-1974387[+]	560	0.0847996	0.124545	0.0499609	0.398307	0.740544	No	Antisense	AT1G06475	Non-overlapped	Promoter	0	553	#N/A	#N/A	#N/A
AT1G59710	Chr1:21938367-21940184[+]	#N/A	Protein of unknown function (DUF569)	Chr1:21940185-21940504[+]	320	0.115422	0.12714	0.116575	0.929382	1.00067	No	Antisense	AT1G59720	CDS	CDS	433	753	#N/A	#N/A	#N/A
AT1G02420	Chr1:493683-495158[+]	#N/A	Pentatricopeptide repeat (PPR) superfamily protein	Chr1:495829-496268[+]	440	0.119919	0.277395	0.105978	0.651775	1.03796	No	Antisense	AT1G02430	3' UTR	Promoter	109	343	#N/A	#N/A	#N/A
AT2G34380	Chr2:14512707-14514516[+]	#N/A	Putative adipose-regulatory protein (Seipin)	Chr2:14514517-14515926[+]	1410	0.213302	0.544111	0.482837	0.960456	1.83916	No	Antisense	AT2G34390	3' UTR	Promoter	30	1429	#N/A	#N/A	#N/A
AT5G08780	Chr5:2856740-2859006[+]	#N/A	winged-helix DNA-binding transcription factor family protein	Chr5:2859057-2860636[+]	1580	0.577734	0.599602	0.203638	5.19311	4.91386	No	Antisense	AT5G08790	3' UTR	Promoter	158	1364	#N/A	#N/A	#N/A
AT3G10220	Chr3:3161757-3164231[+]	#N/A	tubulin folding cofactor B	Chr3:3164262-3166211[+]	1950	0.124469	0.119222	0.0358694	0.634567	1.05527	No	Antisense	AT3G10230	3' UTR	Promoter	157	1934	#N/A	#N/A	#N/A
AT5G08340	Chr5:2683832-2685997[+]	#N/A	Nucleotidylyl transferase superfamily protein	Chr5:2686168-2686417[+]	250	0.0422113	0.185987	0.111912	0.594805	0.356961	No	Antisense	AT5G08350	Non-overlapped	CDS	0	173	#N/A	#N/A	#N/A
AT5G56730	Chr5:22946906-22952576[-]	#N/A	Insulinase (Peptidase family M16) protein	Chr5:22946366-22946715[-]	350	0.030151	0	0.0799375	0.0303472	0.254972	No	Antisense	AT5G56720	Non-overlapped	CDS	0	350	#N/A	#N/A	#N/A
AT5G40980	Chr5:16414848-16415220[-]	#N/A	Protein of unknown function (DUF 3339)	Chr5:16413818-16414547[-]	730	0.195155	0.557324	0.376874	1.70963	1.64674	No	Antisense	AT5G40970	Non-overlapped	Promoter	0	467	#N/A	#N/A	#N/A
AT4G01800	Chr4:770722-776260[-]	AGY1, SECA1	Albino or Glassy Yellow 1	Chr4:769662-770721[-]	1060	0.119466	0.175459	0.0923806	0.601218	1.00036	No	Antisense	AT4G01790	CDS	Promoter	114	971	#N/A	#N/A	#N/A
AT1G78050	Chr1:29347581-29349755[+]	PGM	phosphoglycerate/bisphosphoglycerate mutase	Chr1:29349766-29351595[+]	1830	0.118215	0.0794002	0.0407696	0.420798	0.986778	No	Antisense	AT1G78060	3' UTR	CDS	77	1907	#N/A	#N/A	#N/A
AT1G74300	Chr1:27935298-27936608[+]	#N/A	alpha/beta-Hydrolases superfamily protein	Chr1:27936639-27939888[+]	3250	0.125011	0.3219	0.22526	1.7452	1.04019	No	Antisense	AT1G74310	3' UTR	5' UTR	101	3351	#N/A	#N/A	#N/A
AT1G54150	Chr1:20215432-20217489[+]	#N/A	E3 Ubiquitin ligase family protein	Chr1:20217550-20218758[+]	1209	0.239837	0.352248	0.282607	1.48057	1.98842	No	Antisense	AT1G54160	3' UTR	5' UTR	154	1423	#N/A	#N/A	#N/A
AT4G22530	Chr4:11859004-11860208[-]	#N/A	S-adenosyl-L-methionine-dependent methyltransferases superfamily protein	Chr4:11858444-11859003[-]	560	0.30151	0.633103	0.657819	1.08112	2.49348	Yes	Antisense	AT4G22520	Non-overlapped	Promoter	0	357	#N/A	#N/A	#N/A
AT5G26710	Chr5:9305513-9308440[+]	#N/A	Glutamyl/glutaminyl-tRNA synthetase, class Ic	Chr5:9308451-9309110[+]	660	0.159891	0.281798	0.317933	1.14262	1.31236	No	Antisense	AT5G26700	CDS	CDS	151	811	#N/A	#N/A	#N/A
AT3G11560	Chr3:3639435-3646061[+]	#N/A	LETM1-like protein	Chr3:3646152-3647511[+]	1360	0.201745	0.333341	0.222865	1.33159	1.63273	No	Antisense	AT3G11570	CDS	5' UTR	1040	2400	#N/A	#N/A	#N/A
AT5G38350	Chr5:15328659-15331528[+]	#N/A	Disease resistance protein (NBS-LRR class) family	Chr5:15331599-15331838[+]	240	0.175881	0.24909	0.0666146	1.16331	1.39985	No	Antisense	AT5G38360	Non-overlapped	3' UTR	0	128	#N/A	#N/A	#N/A
AT2G34180	Chr2:14430761-14432269[-]	CIPK13, SnRK3.7, WL2, ATWL2	CBL-interacting protein kinase 13	Chr2:14430461-14430720[-]	260	0.121763	0.223542	0.376628	0.817039	0.969125	No	Antisense	AT2G34170	3' UTR	3' UTR	100	360	#N/A	#N/A	#N/A
AT5G16940	Chr5:5571550-5572405[-]	#N/A	carbon-sulfur lyases	Chr5:5570130-5571529[-]	1400	0.120604	0.215878	0.159875	1.30493	0.944897	No	Antisense	AT5G16930	CDS	CDS	310	1710	#N/A	#N/A	#N/A
AT1G74470	Chr1:27991165-27993006[+]	#N/A	Pyridine nucleotide-disulphide oxidoreductase family protein	Chr1:27993127-27993486[+]	360	0.117254	0.0968682	0.077717	0.398307	0.91865	Yes	Antisense	AT1G74480	Non-overlapped	CDS	0	360	#N/A	#N/A	#N/A
AT2G37650	Chr2:15792623-15795235[+]	#N/A	GRAS family transcription factor	Chr2:15795246-15795495[+]	250	0.126634	0.116242	0.0373041	0.594805	0.986893	No	Antisense	AT2G37660	3' UTR	CDS	23	273	#N/A	#N/A	#N/A
AT4G27540	Chr4:13753210-13754745[-]	PRA1.H	prenylated RAB acceptor 1.H	Chr4:13752960-13753199[-]	240	0.13191	0.169519	0.310868	0.24341	1.00614	No	Antisense	AT4G27530	3' UTR	CDS	48	288	#N/A	#N/A	#N/A
AT1G05835	Chr1:1762224-1762814[+]	#N/A	PHD finger protein	Chr1:1763205-1763554[+]	350	0.0452264	0.033212	0	0.0910415	0.344962	No	Antisense	AT1G05840	3' UTR	CDS	81	431	#N/A	#N/A	#N/A
AT3G63520	Chr3:23452911-23456078[+]	CCD1, ATCCD1, ATNCED1, NCED1	carotenoid cleavage dioxygenase 1	Chr3:23456109-23456338[+]	230	0.114705	0.17689	0.121644	0.808158	0.867297	No	Antisense	AT3G63530	Non-overlapped	3' UTR	0	182	#N/A	#N/A	#N/A
AT5G01980	Chr5:375215-377208[+]	#N/A	RING/U-box superfamily protein	Chr5:377229-379998[+]	2770	0.342872	0.585406	0.43095	2.66113	2.58681	No	Antisense	AT5G01990	Non-overlapped	Promoter	0	2681	#N/A	#N/A	#N/A
AT3G24030	Chr3:8679552-8680824[-]	#N/A	hydroxyethylthiazole kinase family protein	Chr3:8678632-8679191[-]	560	0.422113	0.834828	0.517171	2.56847	3.16875	No	Antisense	AT3G24020	CDS	Promoter	105	559	#N/A	#N/A	#N/A
AT1G11480	Chr1:3864153-3866969[-]	#N/A	eukaryotic translation initiation factor-related	Chr1:3863683-3864062[-]	380	0.0416559	0.015295	0	0.0978297	0.303914	No	Antisense	AT1G11475	Non-overlapped	CDS	0	348	#N/A	#N/A	#N/A
AT2G42975	Chr2:17873947-17874936[+]	#N/A	unknown protein; FUNCTIONS IN: molecular_function unknown; INVOLVED IN: biological_process unknown; LOCATED IN: chloroplast thylakoid membrane, chloroplast; Has 32 Blast hits to 32 proteins in 16 species: Archae - 0; Bacteria - 0; Metazoa - 2; Fungi - 2; Plants - 28; Viruses - 0; Other Eukaryotes - 0 (source: NCBI BLink).	Chr2:17874947-17877086[+]	2140	0.204646	0.608369	0.23533	0.82143	1.48897	No	Antisense	AT2G42980	Non-overlapped	Promoter	0	1584	#N/A	#N/A	#N/A
AT3G49890	Chr3:18499170-18500722[+]	#N/A	unknown protein; Has 27 Blast hits to 27 proteins in 13 species: Archae - 0; Bacteria - 0; Metazoa - 3; Fungi - 0; Plants - 21; Viruses - 0; Other Eukaryotes - 3 (source: NCBI BLink).	Chr3:18500793-18502102[+]	1310	0.23764	0.204089	0.16374	0.381077	1.7271	No	Antisense	AT3G49900	CDS	CDS	148	1458	#N/A	#N/A	#N/A
AT1G59840	Chr1:22026507-22029379[+]	CCB4	cofactor assembly of complex C	Chr1:22029440-22030489[+]	1050	0.353469	1.59691	0.855641	3.38754	2.55846	No	Antisense	AT1G59850	CDS	Promoter	871	1639	#N/A	#N/A	#N/A
AT2G44130	Chr2:18253610-18255054[+]	#N/A	Galactose oxidase/kelch repeat superfamily protein	Chr2:18255265-18255484[+]	220	0.119919	0	0.127173	0.144839	0.858997	No	Antisense	AT2G44140	3' UTR	CDS	1445	1665	#N/A	#N/A	#N/A
AT5G41330	Chr5:16535339-16537903[-]	#N/A	BTB/POZ domain with WD40/YVTN repeat-like protein	Chr5:16534579-16535098[-]	520	0.119919	0.237767	0.339129	0.748334	0.858997	No	Antisense	AT5G41320	CDS	CDS	651	1171	#N/A	#N/A	#N/A
AT4G38200	Chr4:17915293-17922732[+]	#N/A	SEC7-like guanine nucleotide exchange family protein	Chr4:17922793-17923331[+]	539	0.557989	1.00283	0.545028	3.10369	3.98333	No	Antisense	AT4G38210	Non-overlapped	CDS	0	539	#N/A	#N/A	#N/A
AT1G12280	Chr1:4174875-4177559[-]	#N/A	LRR and NB-ARC domains-containing disease resistance protein	Chr1:4174425-4174734[-]	310	0.119145	0.468717	0.285798	0.513944	0.846682	No	Antisense	AT1G12270	Non-overlapped	CDS	0	310	#N/A	#N/A	#N/A
AT5G57890	Chr5:23447407-23449679[-]	#N/A	Glutamine amidotransferase type 1 family protein	Chr5:23446007-23447326[-]	1320	0.143902	0.105674	0.0741844	0.273584	1.02205	No	Antisense	AT5G57880	Non-overlapped	CDS	0	1238	#N/A	#N/A	#N/A
AT4G01690	Chr4:729887-732433[+]	PPOX, HEMG1, PPO1	Flavin containing amine oxidoreductase family	Chr4:732964-733663[+]	700	0.414576	0.298908	0.239812	1.51736	2.89469	No	Antisense	AT4G01700	CDS	Promoter	121	668	#N/A	#N/A	#N/A
AT3G62080	Chr3:22986174-22988777[+]	#N/A	SNF7 family protein	Chr3:22988828-22989187[+]	360	0.117254	0.51663	0.259057	0.678597	0.816578	No	Antisense	AT3G62090	3' UTR	CDS	231	591	#N/A	#N/A	#N/A
AT5G66530	Chr5:26553744-26555859[-]	#N/A	Galactose mutarotase-like superfamily protein	Chr5:26553064-26553463[-]	400	0.0791463	0.174363	0.0349726	0.451414	0.55119	No	Antisense	AT5G66520	Non-overlapped	CDS	0	400	#N/A	#N/A	#N/A
AT3G07565	Chr3:2413640-2416284[+]	#N/A	Protein of unknown function (DUF3755)	Chr3:2416295-2416564[+]	270	0.0781692	0.0430525	0	0.137686	0.544385	No	Antisense	AT3G07568	3' UTR	CDS	42	312	#N/A	#N/A	#N/A
AT1G29220	Chr1:10210520-10212722[-]	#N/A	transcriptional regulator family protein	Chr1:10210250-10210479[-]	230	0.0688228	0.17689	0.060822	0.230902	0.479296	No	Antisense	AT1G29200	3' UTR	CDS	103	333	#N/A	#N/A	#N/A
AT3G52155	Chr3:19343695-19344849[+]	#N/A	Phosphoglycerate mutase family protein	Chr3:19345110-19346659[+]	1550	0.13957	0.209985	0.162454	0.832589	0.968604	No	Antisense	AT3G52160	Non-overlapped	Promoter	0	1506	#N/A	#N/A	#N/A
AT2G34170	Chr2:14428215-14430860[+]	#N/A	Protein of unknown function (DUF688)	Chr2:14432081-14432620[+]	540	0.0879403	0.17221	0.164069	0.344216	0.602712	No	Antisense	AT2G34180	CDS	Promoter	100	289	#N/A	#N/A	#N/A
AT1G15270	Chr1:5250650-5252121[-]	#N/A	Translation machinery associated TMA7	Chr1:5249475-5250639[-]	1165	0.25363	0.294346	0.268174	0.702023	1.70775	No	Antisense	AT1G15260	Non-overlapped	Promoter	0	814	#N/A	#N/A	#N/A
AT5G63020	Chr5:25283063-25286002[-]	#N/A	Disease resistance protein (CC-NBS-LRR class) family	Chr5:25281538-25283052[-]	1515	0.160208	0.2954	0.104649	1.10071	1.07414	No	Antisense	AT5G63010	3' UTR	Promoter	114	1453	#N/A	#N/A	#N/A
AT3G46220	Chr3:16979048-16984177[+]	#N/A	unknown protein; INVOLVED IN: biological_process unknown; EXPRESSED IN: 24 plant structures; EXPRESSED DURING: 13 growth stages; CONTAINS InterPro DOMAIN/s: Protein of unknown function DUF2042 (InterPro:IPR018611).	Chr3:16984198-16985207[+]	1010	0.161949	0.132355	0.0738696	0.694079	1.08107	No	Antisense	AT3G46230	3' UTR	Promoter	60	704	#N/A	#N/A	#N/A
AT1G76060	Chr1:28543100-28543850[-]	EMB1793	LYR family of Fe/S cluster biogenesis protein	Chr1:28542180-28542979[-]	800	0.124151	0.350435	0.349726	0.937192	0.826013	No	Antisense	AT1G76050	3' UTR	CDS	128	928	#N/A	#N/A	#N/A
AT1G12140	Chr1:4121369-4124595[+]	FMO GS-OX5	flavin-monooxygenase glucosinolate S-oxygenase 5	Chr1:4124606-4125335[+]	730	0.151787	0.350318	0.338548	0.792976	1.00674	No	Antisense	AT1G12150	CDS	5' UTR	1066	1796	#N/A	#N/A	#N/A
AT2G47980	Chr2:19631259-19636978[+]	SCC3, ATSCC3	sister-chromatid cohesion protein 3	Chr2:19636979-19641048[+]	4070	0.167238	0.234197	0.134047	0.473662	1.10535	No	Antisense	AT2G48000	Non-overlapped	Promoter	0	1797	#N/A	#N/A	#N/A
AT4G36945	Chr4:17419918-17422130[-]	#N/A	PLC-like phosphodiesterases superfamily protein	Chr4:17419308-17419867[-]	560	0.13191	0.363256	0.432995	0.673328	0.87178	No	Antisense	AT4G36940	3' UTR	CDS	335	895	#N/A	#N/A	#N/A
AT5G14460	Chr5:4660059-4662668[-]	#N/A	Pseudouridine synthase family protein	Chr5:4658839-4659478[-]	640	0.140155	0.544884	0.174863	1.02896	0.91865	No	Antisense	AT5G14450	3' UTR	CDS	117	757	#N/A	#N/A	#N/A
AT5G66290	Chr5:26477661-26479441[-]	#N/A	unknown protein; FUNCTIONS IN: molecular_function unknown; INVOLVED IN: N-terminal protein myristoylation; LOCATED IN: cellular_component unknown; EXPRESSED IN: 14 plant structures; EXPRESSED DURING: 7 growth stages; Has 1807 Blast hits to 1807 proteins in 277 species: Archae - 0; Bacteria - 0; Metazoa - 736; Fungi - 347; Plants - 385; Viruses - 0; Other Eukaryotes - 339 (source: NCBI BLink).	Chr5:26476071-26477650[-]	1580	0.467531	0.890207	0.587304	2.58143	3.05663	No	Antisense	AT5G66280	3' UTR	Promoter	94	1579	#N/A	#N/A	#N/A
AT5G48810	Chr5:19789067-19790334[-]	ATB5-B, B5 #3, ATCB5-D, CB5-D	cytochrome B5 isoform D	Chr5:19788797-19789066[-]	270	0.156338	0.107631	0.0345409	0.491737	1.011	No	Antisense	AT5G48800	3' UTR	CDS	63	333	#N/A	#N/A	#N/A
AT1G66910	Chr1:24961634-24963946[-]	#N/A	Protein kinase superfamily protein	Chr1:24960594-24961483[-]	890	0.0781692	0.118394	0.0604465	0.481902	0.505501	No	Antisense	AT1G66900	Non-overlapped	CDS	0	890	#N/A	#N/A	#N/A
AT5G54270	Chr5:22038273-22039568[+]	LHCB3, LHCB3*1	light-harvesting chlorophyll B-binding protein 3	Chr5:22039639-22040278[+]	640	0.148399	0.199791	0.0728597	0.804911	0.951459	No	Antisense	AT5G54280	3' UTR	CDS	186	826	#N/A	#N/A	#N/A
AT4G31360	Chr4:15221843-15223627[+]	#N/A	selenium binding	Chr4:15223648-15223927[+]	280	0.169599	0.145302	0.0333073	0.758679	1.06863	No	Antisense	AT4G31370	Non-overlapped	CDS	0	273	#N/A	#N/A	#N/A
AT1G67920	Chr1:25473544-25474140[+]	#N/A	unknown protein; BEST Arabidopsis thaliana protein match is: unknown protein (TAIR:AT1G24600.1); Has 22 Blast hits to 22 proteins in 5 species: Archae - 0; Bacteria - 0; Metazoa - 0; Fungi - 0; Plants - 22; Viruses - 0; Other Eukaryotes - 0 (source: NCBI BLink).	Chr1:25474151-25474740[+]	590	0.160975	0.157616	0.0711308	0.711101	0.996502	No	Antisense	AT1G67930	3' UTR	CDS	1	591	#N/A	#N/A	#N/A
AT1G09760	Chr1:3159125-3161692[-]	U2A'	U2 small nuclear ribonucleoprotein A	Chr1:3157215-3159114[-]	1900	0.322139	0.351785	0.142345	1.07892	1.98649	Yes	Antisense	AT1G09750	3' UTR	Promoter	24	1638	#N/A	#N/A	#N/A
AT2G42360	Chr2:17640798-17641790[+]	#N/A	RING/U-box superfamily protein	Chr2:17641831-17642330[+]	500	0.22161	0.302229	0.195847	0.945315	1.36485	No	Antisense	AT2G42365	Other noncoding gene	Other noncoding gene	7	507	#N/A	#N/A	#N/A
AT1G61670	Chr1:22770029-22772426[+]	#N/A	Lung seven transmembrane receptor family protein	Chr1:22772497-22773126[+]	630	0.15913	0.378247	0.355278	0.547935	0.966562	No	Antisense	AT1G61680	3' UTR	CDS	112	742	#N/A	#N/A	#N/A
AT2G19190	Chr2:8326049-8329944[-]	FRK1	FLG22-induced receptor-like kinase 1	Chr2:8325259-8325928[-]	670	0.094503	0.260243	0.375825	0.348766	0.571953	Yes	Antisense	AT2G19180	Non-overlapped	CDS	0	670	#N/A	#N/A	#N/A
AT3G63180	Chr3:23336092-23340317[-]	ATTKL, TKL	TIC-like	Chr3:23334322-23336021[-]	1700	0.145877	0.102566	0.0877745	0.587307	0.876963	No	Antisense	AT3G63170	3' UTR	Promoter	18	1688	#N/A	#N/A	#N/A
AT1G75170	Chr1:28213799-28215887[+]	#N/A	Sec14p-like phosphatidylinositol transfer family protein	Chr1:28215898-28216377[+]	480	0.0879403	0.121085	0.106861	0.110641	0.524943	No	Antisense	AT1G75180	3' UTR	CDS	52	532	#N/A	#N/A	#N/A
AT2G46270	Chr2:19000191-19003403[+]	GBF3	G-box binding factor 3	Chr2:19003454-19004013[+]	560	0.0659552	0.207575	0.149883	0.208637	0.384333	No	Antisense	AT2G46280	Non-overlapped	CDS	0	560	#N/A	#N/A	#N/A
AT4G23270	Chr4:12171103-12173925[+]	CRK19	cysteine-rich RLK (RECEPTOR-like protein kinase) 19	Chr4:12173936-12174285[+]	350	1.03976	1.33336	0.850315	10.4341	6.03684	No	Antisense	AT4G23271	Non-overlapped	Promoter	0	102	#N/A	#N/A	#N/A
AT1G73100	Chr1:27491184-27494182[+]	SUVH3, SDG19	SU(VAR)3-9 homolog 3	Chr1:27494233-27494442[+]	210	0.150755	0.359796	0.0444097	0.783969	0.874905	No	Antisense	AT1G73110	3' UTR	CDS	62	272	#N/A	#N/A	#N/A
AT5G58250	Chr5:23559474-23560513[+]	#N/A	unknown protein; FUNCTIONS IN: molecular_function unknown; INVOLVED IN: biological_process unknown; LOCATED IN: thylakoid, chloroplast; EXPRESSED IN: 22 plant structures; EXPRESSED DURING: 14 growth stages; CONTAINS InterPro DOMAIN/s: Protein of unknown function DUF2488 (InterPro:IPR019616); Has 1807 Blast hits to 1807 proteins in 277 species: Archae - 0; Bacteria - 0; Metazoa - 736; Fungi - 347;…	Chr5:23560844-23562141[+]	1298	0.186992	0.268664	0.0395171	0.687371	1.07172	No	Antisense	AT5G58260	Non-overlapped	Promoter	0	1069	#N/A	#N/A	#N/A
AT1G56180	Chr1:21025904-21028064[-]	#N/A	unknown protein; INVOLVED IN: biological_process unknown; LOCATED IN: chloroplast; EXPRESSED IN: 23 plant structures; EXPRESSED DURING: 15 growth stages; BEST Arabidopsis thaliana protein match is: unknown protein (TAIR:AT5G27290.1); Has 436 Blast hits to 436 proteins in 83 species: Archae - 0; Bacteria - 153; Metazoa - 0; Fungi - 0; Plants - 160; Viruses - 0; Other Eukaryotes - 123 (source: NCBI…	Chr1:21025184-21025893[-]	710	0.170926	0.474791	0.256138	0.897593	0.97595	No	Antisense	AT1G56170	Non-overlapped	CDS	0	700	#N/A	#N/A	#N/A
AT4G03410	Chr4:1501168-1503561[+]	#N/A	Peroxisomal membrane 22 kDa (Mpv17/PMP22) family protein	Chr4:1503712-1505741[+]	2030	0.119564	0.0744406	0.0390499	0.672347	0.680098	No	Antisense	AT4G03415	Non-overlapped	5' UTR	0	2030	#N/A	#N/A	#N/A
AT4G16410	Chr4:9261866-9262601[-]	#N/A	unknown protein; CONTAINS InterPro DOMAIN/s: Protein of unknown function DUF751 (InterPro:IPR008470); Has 30201 Blast hits to 17322 proteins in 780 species: Archae - 12; Bacteria - 1396; Metazoa - 17338; Fungi - 3422; Plants - 5037; Viruses - 0; Other Eukaryotes - 2996 (source: NCBI BLink).	Chr4:9261116-9261765[-]	650	0.66564	0.581209	0.308477	0.923254	3.75536	No	Antisense	AT4G16400	CDS	CDS	736	1386	#N/A	#N/A	#N/A
AT3G13480	Chr3:4392956-4393961[-]	#N/A	unknown protein; FUNCTIONS IN: molecular_function unknown; INVOLVED IN: biological_process unknown; LOCATED IN: endomembrane system; EXPRESSED IN: 23 plant structures; EXPRESSED DURING: 13 growth stages; BEST Arabidopsis thaliana protein match is: unknown protein (TAIR:AT1G55475.1); Has 30201 Blast hits to 17322 proteins in 780 species: Archae - 12; Bacteria - 1396; Metazoa - 17338; Fungi - 3422;…	Chr3:4392656-4392915[-]	260	0.121763	0.134125	0.107608	0.40852	0.686464	No	Antisense	AT3G13470	Non-overlapped	3' UTR	0	146	#N/A	#N/A	#N/A
AT1G71480	Chr1:26931940-26933313[+]	#N/A	Nuclear transport factor 2 (NTF2) family protein	Chr1:26933364-26935981[+]	2618	0.189451	0.555013	0.263608	1.20496	1.06071	No	Antisense	AT1G71490	3' UTR	Promoter	409	2871	#N/A	#N/A	#N/A
AT3G19490	Chr3:6754615-6758261[-]	ATNHD1, NHD1	sodium:hydrogen antiporter 1	Chr3:6754375-6754604[-]	230	0.183528	0	0.020274	0.99288	1.02706	No	Antisense	AT3G19480	CDS	CDS	171	401	#N/A	#N/A	#N/A
AT4G38090	Chr4:17883617-17884821[-]	#N/A	Ribosomal protein S5 domain 2-like superfamily protein	Chr4:17881517-17883606[-]	2090	0.319159	0.626572	0.363943	1.4067	1.78225	No	Antisense	AT4G38070	Non-overlapped	CDS	0	1053	#N/A	#N/A	#N/A
AT5G05470	Chr5:1620458-1622340[+]	EIF2 ALPHA, ATEIF2-A2, EIF2-A2	eukaryotic translation initiation factor 2 alpha subunit	Chr5:1622391-1624205[+]	1815	0.30234	0.867811	0.205533	1.38694	1.66304	No	Antisense	AT5G05480	CDS	5' UTR	169	1984	#N/A	#N/A	#N/A
AT1G17100	Chr1:5844676-5845661[+]	#N/A	SOUL heme-binding family protein	Chr1:5845692-5846071[+]	380	0.111082	0.367079	0.11044	0.768662	0.607829	No	Antisense	AT1G17110	3' UTR	CDS	2	382	#N/A	#N/A	#N/A
AT3G21220	Chr3:7445757-7447351[+]	ATMKK5, ATMAP2K_ALPHA, MAP2K_A, MKK5, ATMEK5, MEK5	MAP kinase kinase 5	Chr3:7447352-7449341[+]	1990	0.183875	0.678077	0.664127	1.8829	1.00216	No	Antisense	AT3G21230	Non-overlapped	CDS	0	1302	#N/A	#N/A	#N/A
AT1G72180	Chr1:27162820-27167430[+]	#N/A	Leucine-rich receptor-like protein kinase family protein	Chr1:27167451-27168550[+]	1100	0.321382	0.523088	0.343368	1.30355	1.74663	No	Antisense	AT1G72190	3' UTR	CDS	68	1168	#N/A	#N/A	#N/A
AT1G70770	Chr1:26687798-26691277[-]	#N/A	Protein of unknown function DUF2359, transmembrane	Chr1:26686858-26687797[-]	940	0.185236	0.247323	0.14882	0.423731	1.00521	No	Antisense	AT1G70760	CDS	Promoter	587	1155	#N/A	#N/A	#N/A
AT1G71730	Chr1:26986060-26986909[-]	#N/A	unknown protein; Has 52 Blast hits to 52 proteins in 24 species: Archae - 0; Bacteria - 0; Metazoa - 4; Fungi - 0; Plants - 41; Viruses - 0; Other Eukaryotes - 7 (source: NCBI BLink).	Chr1:26985270-26985969[-]	700	0.0904529	0.0913329	0.0599531	0.280711	0.487447	No	Antisense	AT1G71720	Non-overlapped	CDS	0	700	#N/A	#N/A	#N/A
AT2G20495	Chr2:8833165-8835263[+]	#N/A	CONTAINS InterPro DOMAIN/s: Serine-threonine protein kinase 19 (InterPro:IPR018865); Has 155 Blast hits to 154 proteins in 53 species: Archae - 0; Bacteria - 0; Metazoa - 95; Fungi - 5; Plants - 34; Viruses - 0; Other Eukaryotes - 21 (source: NCBI BLink).	Chr2:8835274-8835993[+]	720	0.491	0.758801	0.602307	1.51947	2.60284	No	Antisense	AT2G20500	3' UTR	5' UTR	144	864	#N/A	#N/A	#N/A
AT1G70070	Chr1:26390016-26394196[-]	EMB25, PDE317, ISE2	DEAD/DEAH box helicase, putative	Chr1:26386706-26389755[-]	3050	0.107258	0.17341	0.0596255	0.390036	0.561087	No	Antisense	AT1G70060	Non-overlapped	CDS	0	3050	#N/A	#N/A	#N/A
AT3G02040	Chr3:348167-350010[-]	SRG3	senescence-related gene 3	Chr3:347347-348046[-]	700	0.15243	0.219568	0.0414491	1.00314	0.793247	No	Antisense	AT3G02030	CDS	CDS	681	1381	#N/A	#N/A	#N/A
AT2G34470	Chr2:14530735-14532505[-]	UREG, PSKF109	urease accessory protein G	Chr2:14530385-14530724[-]	340	0.201745	0.119661	0.0685738	0.468596	1.03445	No	Antisense	AT2G34460	3' UTR	CDS	224	564	#N/A	#N/A	#N/A
AT5G19000	Chr5:6342220-6344794[+]	BPM1	BTB-POZ and MATH domain 1	Chr5:6344835-6345044[+]	210	0.175881	0.415149	0.177639	0.783969	0.899902	No	Antisense	AT5G19010	3' UTR	3' UTR	6	216	#N/A	#N/A	#N/A
AT4G35987	Chr4:17035028-17036963[+]	#N/A	S-adenosyl-L-methionine-dependent methyltransferases superfamily protein	Chr4:17037144-17038053[+]	910	0.111082	0.142753	0.139072	0.773321	0.543362	No	Antisense	AT4G36000	Non-overlapped	CDS	0	471	#N/A	#N/A	#N/A
AT2G02760	Chr2:773684-775371[+]	ATUBC2, UBC2	ubiquiting-conjugating enzyme 2	Chr2:775392-776661[+]	1270	0.315754	0.663585	0.81511	0.9367	1.53349	No	Antisense	AT2G02770	Non-overlapped	CDS	0	1180	#N/A	#N/A	#N/A
AT5G13270	Chr5:4246954-4249212[-]	RARE1	Pentatricopeptide repeat (PPR) superfamily protein	Chr5:4245954-4246543[-]	590	0.169919	0.453146	0.403074	0.747106	0.809658	No	Antisense	AT5G13260	Non-overlapped	CDS	0	590	#N/A	#N/A	#N/A
AT4G14100	Chr4:8120718-8122417[+]	#N/A	transferases, transferring glycosyl groups	Chr4:8122478-8124087[+]	1610	0.357223	0.33212	0.220118	1.10503	1.6433	No	Antisense	AT4G14090	3' UTR	Promoter	230	1588	#N/A	#N/A	#N/A
AT1G69060	Chr1:25964468-25967450[+]	#N/A	Chaperone DnaJ-domain superfamily protein	Chr1:25967471-25968160[+]	690	0.221762	0.185313	0.20274	0.738888	1.01945	No	Antisense	AT1G69070	CDS	CDS	139	829	#N/A	#N/A	#N/A
AT2G30870	Chr2:13141357-13142613[+]	ATGSTF10, ERD13, ATGSTF4, GSTF10	glutathione S-transferase PHI 10	Chr2:13142664-13143363[+]	700	0.105528	0.174363	0.0865989	0.295885	0.479948	No	Antisense	AT2G30880	Non-overlapped	CDS	0	699	#N/A	#N/A	#N/A
AT1G76390	Chr1:28655390-28658711[+]	#N/A	ARM repeat superfamily protein	Chr1:28658742-28659111[+]	370	0.24243	0.204209	0.252055	0.531076	1.09245	No	Antisense	AT1G76400	3' UTR	CDS	158	528	#N/A	#N/A	#N/A
AT3G48690	Chr3:18037047-18038234[-]	ATCXE12, CXE12	alpha/beta-Hydrolases superfamily protein	Chr3:18036387-18037026[-]	640	0.20611	0.145302	0.0874316	0.63895	0.926852	Yes	Antisense	AT3G48680	Non-overlapped	CDS	0	640	#N/A	#N/A	#N/A
AT4G02610	Chr4:1147634-1149336[+]	#N/A	Aldolase-type TIM barrel family protein	Chr4:1149357-1149646[+]	290	0.236529	0.300625	0.128635	0.512763	1.04989	No	Antisense	AT4G02620	3' UTR	CDS	89	379	#N/A	#N/A	#N/A
AT1G59910	Chr1:22053951-22057052[-]	#N/A	Actin-binding FH2 (formin homology 2) family protein	Chr1:22053641-22053930[-]	290	0.243527	0.201188	0.107608	1.14386	1.07008	No	Antisense	AT1G59900	Non-overlapped	CDS	0	245	#N/A	#N/A	#N/A
AT5G05480	Chr5:1622172-1624270[-]	#N/A	Peptide-N4-(N-acetyl-beta-glucosaminyl)asparagine amidase A protein	Chr5:1621852-1622121[-]	270	0.234507	0.387473	0.224516	0.688431	1.03044	No	Antisense	AT5G05470	CDS	CDS	169	439	#N/A	#N/A	#N/A
AT5G58560	Chr5:23670395-23672877[+]	#N/A	Phosphatidate cytidylyltransferase family protein	Chr5:23672908-23673627[+]	720	0.256493	0.452052	0.246104	0.5237	1.12279	No	Antisense	AT5G58570	CDS	Promoter	183	563	#N/A	#N/A	#N/A
AT3G14580	Chr3:4903012-4904229[+]	#N/A	Pentatricopeptide repeat (PPR) superfamily protein	Chr3:4904760-4905529[+]	770	0.123345	0.105674	0.0726704	0.427619	0.53176	No	Antisense	AT3G14590	Non-overlapped	CDS	0	770	#N/A	#N/A	#N/A
AT5G66055	Chr5:26417156-26419264[-]	EMB16, EMB2036, AKRP	ankyrin repeat protein	Chr5:26416866-26417105[-]	240	0.351761	0.605426	0.272009	1.04002	1.50921	No	Antisense	AT5G66052	Non-overlapped	3' UTR	0	59	#N/A	#N/A	#N/A
AT5G66000	Chr5:26396467-26397500[-]	#N/A	unknown protein; BEST Arabidopsis thaliana protein match is: unknown protein (TAIR:AT2G17540.3); Has 30201 Blast hits to 17322 proteins in 780 species: Archae - 12; Bacteria - 1396; Metazoa - 17338; Fungi - 3422; Plants - 5037; Viruses - 0; Other Eukaryotes - 2996 (source: NCBI BLink).	Chr5:26396037-26396446[-]	410	0.246233	0.484341	0.248694	1.11526	1.04989	No	Antisense	AT5G65990	3' UTR	CDS	47	457	#N/A	#N/A	#N/A
AT2G06520	Chr2:2587729-2588358[-]	PSBX	photosystem II subunit X	Chr2:2586089-2587608[-]	1520	0.144843	0.216529	0.109718	0.718514	0.61758	No	Antisense	AT2G06510	Non-overlapped	CDS	0	1520	#N/A	#N/A	#N/A
AT1G73440	Chr1:27611363-27612815[+]	#N/A	calmodulin-related	Chr1:27612846-27613355[+]	510	0.22761	0.54702	0.420586	0.551902	0.946956	No	Antisense	AT1G73445	Other noncoding gene	Other noncoding gene	200	705	#N/A	#N/A	#N/A
AT3G16740	Chr3:5699333-5700826[+]	#N/A	F-box and associated interaction domains-containing protein	Chr3:5700997-5701426[+]	430	0.147249	0.0946155	0.0650654	0.395219	0.610399	No	Antisense	AT3G16750	Non-overlapped	CDS	0	416	#N/A	#N/A	#N/A
AT4G16670	Chr4:9385219-9387754[+]	#N/A	Plant protein of unknown function (DUF828) with plant pleckstrin homology-like region	Chr4:9387785-9388044[+]	260	0.263821	0.894168	1.32717	0.51065	1.09027	No	Antisense	AT4G16680	3' UTR	3' UTR	362	622	#N/A	#N/A	#N/A
AT4G38250	Chr4:17935402-17937068[+]	#N/A	Transmembrane amino acid transporter family protein	Chr4:17937219-17938371[+]	1153	0.526269	0.922474	0.51362	1.74108	2.1626	Yes	Antisense	AT4G38260	3' UTR	5' UTR	148	1301	#N/A	#N/A	#N/A
AT4G38490	Chr4:18006288-18007372[+]	#N/A	unknown protein; Has 30201 Blast hits to 17322 proteins in 780 species: Archae - 12; Bacteria - 1396; Metazoa - 17338; Fungi - 3422; Plants - 5037; Viruses - 0; Other Eukaryotes - 2996 (source: NCBI BLink).	Chr4:18007393-18007755[+]	363	0.261641	0.272192	0.218378	1.068	1.07013	No	Antisense	AT4G38495	3' UTR	CDS	16	379	#N/A	#N/A	#N/A
AT3G18930	Chr3:6523379-6525543[-]	#N/A	RING/U-box superfamily protein	Chr3:6521459-6523058[-]	1600	0.362754	0.457702	0.504189	0.926063	1.46984	No	Antisense	AT3G18910	Non-overlapped	Promoter	0	1325	#N/A	#N/A	#N/A
AT1G79880	Chr1:30046028-30048378[-]	#N/A	RNA recognition motif (RRM)-containing protein	Chr1:30044648-30045997[-]	1350	0.250141	0.236789	0.134709	1.1605	1.011	Yes	Antisense	AT1G79870	Non-overlapped	Promoter	0	1252	#N/A	#N/A	#N/A
AT1G56000	Chr1:20944141-20946718[+]	#N/A	FAD/NAD(P)-binding oxidoreductase family protein	Chr1:20946779-20947828[+]	1050	0.422113	0.952076	0.6395	2.1243	1.69982	No	Antisense	AT1G56010	3' UTR	CDS	148	1198	#N/A	#N/A	#N/A
AT2G46610	Chr2:19136566-19138762[-]	RS31a, At-RS31a	RNA-binding (RRM/RBD/RNP motifs) family protein	Chr2:19135596-19136565[-]	970	0.478685	0.341535	0.240362	1.19903	1.92659	No	Antisense	AT2G46600	3' UTR	Promoter	35	582	#N/A	#N/A	#N/A
AT3G02160	Chr3:394070-395984[+]	#N/A	Bromodomain transcription factor	Chr3:395985-399824[+]	3840	0.410846	0.410176	0.397085	0.618205	1.64181	No	Antisense	AT3G02170	Non-overlapped	Promoter	0	3768	#N/A	#N/A	#N/A
AT2G42680	Chr2:17774903-17776320[+]	MBF1A, ATMBF1A	multiprotein bridging factor 1A	Chr2:17776341-17777860[+]	1520	0.256878	0.145302	0.0429489	0.765168	1.0119	No	Antisense	AT2G42690	3' UTR	Promoter	80	1457	#N/A	#N/A	#N/A
AT3G45050	Chr3:16475966-16477524[+]	#N/A	unknown protein; FUNCTIONS IN: molecular_function unknown; INVOLVED IN: biological_process unknown; LOCATED IN: chloroplast; EXPRESSED IN: 22 plant structures; EXPRESSED DURING: 13 growth stages; Has 28 Blast hits to 28 proteins in 12 species: Archae - 0; Bacteria - 2; Metazoa - 0; Fungi - 0; Plants - 26; Viruses - 0; Other Eukaryotes - 0 (source: NCBI BLink).	Chr3:16477575-16479614[+]	2040	0.261355	0.907121	0.357353	2.04489	1.02536	No	Antisense	AT3G45060	Non-overlapped	Promoter	0	1908	#N/A	#N/A	#N/A
AT4G01290	Chr4:537990-543869[-]	#N/A	unknown protein; FUNCTIONS IN: molecular_function unknown; INVOLVED IN: biological_process unknown; LOCATED IN: cellular_component unknown; EXPRESSED IN: 24 plant structures; EXPRESSED DURING: 15 growth stages; Has 1744 Blast hits to 1308 proteins in 219 species: Archae - 0; Bacteria - 241; Metazoa - 793; Fungi - 253; Plants - 108; Viruses - 0; Other Eukaryotes - 349 (source: NCBI BLink).	Chr4:536940-537959[-]	1020	0.489499	0.854308	0.528101	1.53564	1.91636	No	Antisense	AT4G01280	Non-overlapped	3' UTR	0	383	#N/A	#N/A	#N/A
AT5G23680	Chr5:7985354-7986851[-]	#N/A	Sterile alpha motif (SAM) domain-containing protein	Chr5:7985104-7985333[-]	230	0.275291	0.15162	0.060822	0.554166	1.07271	No	Antisense	AT5G23670	3' UTR	3' UTR	45	275	#N/A	#N/A	#N/A
AT4G05060	Chr4:2590065-2592163[-]	#N/A	PapD-like superfamily protein	Chr4:2589387-2590034[-]	648	0.284992	0.295986	0.1799	0.557302	1.10173	No	Antisense	AT4G05053	Other noncoding gene	Other noncoding gene	33	431	#N/A	#N/A	#N/A
AT2G01021	Chr2:6571-6672[+]	#N/A	unknown protein; Has 30201 Blast hits to 17322 proteins in 780 species: Archae - 12; Bacteria - 1396; Metazoa - 17338; Fungi - 3422; Plants - 5037; Viruses - 0; Other Eukaryotes - 2996 (source: NCBI BLink).	Chr2:8143-9762[+]	1620	141.652	192.197	173.577	159.828	538.941	No	Antisense	AT2G01023	Non-overlapped	CDS	0	115	#N/A	#N/A	#N/A
AT2G29640	Chr2:12671206-12673300[+]	JOSL	JOSEPHIN-like protein	Chr2:12673451-12673790[+]	340	0.124151	0.153849	0	0.124959	0.463185	No	Antisense	AT2G29650	Non-overlapped	CDS	0	340	#N/A	#N/A	#N/A
AT5G42765	Chr5:17150238-17151681[-]	#N/A	INVOLVED IN: biological_process unknown; LOCATED IN: thylakoid, chloroplast thylakoid membrane, chloroplast; EXPRESSED IN: 22 plant structures; EXPRESSED DURING: 13 growth stages; CONTAINS InterPro DOMAIN/s: Twin-arginine translocation pathway, signal sequence (InterPro:IPR006311); Has 30201 Blast hits to 17322 proteins in 780 species: Archae - 12; Bacteria - 1396; Metazoa - 17338; Fungi - 3422; …	Chr5:17148688-17150207[-]	1520	0.350604	0.695922	0.417217	1.40456	1.28473	No	Antisense	AT5G42760	CDS	Promoter	214	1614	#N/A	#N/A	#N/A
AT5G38640	Chr5:15467679-15470724[-]	#N/A	NagB/RpiA/CoA transferase-like superfamily protein	Chr5:15466949-15467478[-]	530	0.0895995	0.0877297	0.061587	0.230467	0.326851	No	Antisense	AT5G38630	3' UTR	CDS	507	1037	#N/A	#N/A	#N/A
AT5G58380	Chr5:23596962-23599242[-]	CIPK10, PKS2, SIP1, SNRK3.8	SOS3-interacting protein 1	Chr5:23596232-23596951[-]	720	0.44703	0.427835	0.472778	0.91463	1.61128	No	Antisense	AT5G58375	Non-overlapped	Promoter	0	680	#N/A	#N/A	#N/A
AT5G58060	Chr5:23498139-23500384[+]	YKT61, ATYKT61, ATGP1	SNARE-like superfamily protein	Chr5:23500385-23501554[+]	1170	0.550191	0.37257	0.294926	1.10754	1.96966	Yes	Antisense	AT5G58070	3' UTR	Promoter	324	1149	#N/A	#N/A	#N/A
AT1G06240	Chr1:1911122-1913205[+]	#N/A	Protein of unknown function DUF455	Chr1:1913216-1915065[+]	1850	0.926938	1.49858	0.91496	2.73289	3.31423	Yes	Antisense	AT1G06250	Non-overlapped	Promoter	0	1640	#N/A	#N/A	#N/A
AT5G04670	Chr5:1337839-1340884[-]	#N/A	Enhancer of polycomb-like transcription factor protein	Chr5:1335889-1337658[-]	1770	0.572357	0.699421	0.561143	1.31419	2.02266	No	Antisense	AT5G04660	Non-overlapped	Promoter	0	1664	#N/A	#N/A	#N/A
AT4G15550	Chr4:8877590-8879327[-]	IAGLU	indole-3-acetate beta-D-glucosyltransferase	Chr4:8875790-8877469[-]	1680	0.46973	0.450083	0.0966723	2.79462	1.65485	Yes	Antisense	AT4G15545	3' UTR	Promoter	210	1762	#N/A	#N/A	#N/A
AT3G10630	Chr3:3321463-3323211[-]	#N/A	UDP-Glycosyltransferase superfamily protein	Chr3:3320073-3321442[-]	1370	0.308112	0.45818	0.377807	1.36064	1.08054	No	Antisense	AT3G10620	CDS	Promoter	262	1442	#N/A	#N/A	#N/A
AT3G50960	Chr3:18938697-18940428[-]	PLP3a	phosducin-like protein 3 homolog	Chr3:18938437-18938676[-]	240	0.307791	0.314822	0.272009	0.59746	1.07176	No	Antisense	AT3G50950	3' UTR	CDS	103	343	#N/A	#N/A	#N/A
AT3G60740	Chr3:22447245-22453364[-]	TTN1, EMB133, TFC D, CHO	ARM repeat superfamily protein	Chr3:22446725-22447194[-]	470	0.62868	1.22425	0.515908	1.41244	2.17795	No	Antisense	AT3G60730	3' UTR	CDS	29	499	#N/A	#N/A	#N/A
AT4G36960	Chr4:17426921-17429765[+]	#N/A	RNA-binding (RRM/RBD/RNP motifs) family protein	Chr4:17429786-17430335[+]	550	0.259024	0.158512	0.118695	0.270366	0.897175	No	Antisense	AT4G36970	3' UTR	CDS	22	572	#N/A	#N/A	#N/A
AT2G04040	Chr2:1334512-1336489[-]	ATDTX1, TX1	MATE efflux family protein	Chr2:1333532-1334331[-]	800	0.219851	0.266388	0.077717	0.874062	0.743669	No	Antisense	AT2G04039	3' UTR	CDS	55	855	#N/A	#N/A	#N/A
AT3G06780	Chr3:2143488-2144521[+]	#N/A	glycine-rich protein	Chr3:2144532-2144871[+]	340	0.294859	0.188038	0.0411443	0.843473	0.988128	No	Antisense	AT3G06790	3' UTR	CDS	138	478	#N/A	#N/A	#N/A
AT4G31870	Chr4:15410205-15411617[+]	ATGPX7, GPX7	glutathione peroxidase 7	Chr4:15411758-15412387[+]	630	0.31826	0.562758	0.362679	1.32347	1.04989	No	Antisense	AT4G31875	Non-overlapped	Promoter	0	532	#N/A	#N/A	#N/A
AT5G18210	Chr5:6017865-6019993[+]	#N/A	NAD(P)-binding Rossmann-fold superfamily protein	Chr5:6020024-6020253[+]	230	0.344114	0.32851	0.40548	1.01597	1.11836	No	Antisense	AT5G18220	CDS	CDS	1080	1310	#N/A	#N/A	#N/A
AT3G17920	Chr3:6137255-6142023[+]	#N/A	Outer arm dynein light chain 1 protein	Chr3:6142224-6143233[+]	1010	0.146277	0.0920727	0.0277011	0.394363	0.462573	No	Antisense	AT3G17930	Non-overlapped	CDS	0	1010	#N/A	#N/A	#N/A
AT3G47800	Chr3:17634810-17637204[+]	#N/A	Galactose mutarotase-like superfamily protein	Chr3:17637225-17637684[+]	460	0.332644	0.189525	0.040548	0.311718	1.04989	No	Antisense	AT3G47810	3' UTR	CDS	83	543	#N/A	#N/A	#N/A
AT2G34450	Chr2:14527736-14529492[-]	#N/A	HMG-box (high mobility group) DNA-binding family protein	Chr2:14526706-14527655[-]	950	1.03307	1.37043	1.08967	2.25847	3.22702	No	Antisense	AT2G34440	Non-overlapped	Promoter	0	706	#N/A	#N/A	#N/A
AT1G73885	Chr1:27786864-27787708[+]	#N/A	unknown protein; FUNCTIONS IN: molecular_function unknown; INVOLVED IN: biological_process unknown; LOCATED IN: chloroplast thylakoid membrane, chloroplast; Has 37 Blast hits to 37 proteins in 13 species: Archae - 0; Bacteria - 0; Metazoa - 0; Fungi - 0; Plants - 37; Viruses - 0; Other Eukaryotes - 0 (source: NCBI BLink).	Chr1:27788019-27788908[+]	890	3.02949	3.16726	1.58752	6.99349	9.20714	No	Antisense	AT1G73890	Non-overlapped	Promoter	0	640	#N/A	#N/A	#N/A
AT5G48480	Chr5:19644675-19645889[+]	#N/A	Lactoylglutathione lyase / glyoxalase I family protein	Chr5:19645940-19646849[+]	910	0.394282	0.172447	0.102484	0.338488	1.1768	No	Antisense	AT5G48485	Non-overlapped	Promoter	0	571	#N/A	#N/A	#N/A
AT1G70330	Chr1:26502909-26504619[+]	ENT1,AT, ENT1	equilibrative nucleotide transporter 1	Chr1:26504700-26506719[+]	2020	0.344796	0.492014	0.503237	1.3829	1.0187	No	Antisense	AT1G70340	CDS	Promoter	659	2573	#N/A	#N/A	#N/A
AT1G79850	Chr1:30041243-30041952[-]	RPS17, CS17, PRPS17	ribosomal protein S17	Chr1:30039263-30041072[-]	1810	0.332327	0.494509	0.213829	0.689518	0.98028	No	Antisense	AT1G79840	3' UTR	CDS	198	2008	#N/A	#N/A	#N/A
AT4G33100	Chr4:15971174-15972489[+]	#N/A	CONTAINS InterPro DOMAIN/s: Mitochondrial distribution/morphology family 35/apoptosis (InterPro:IPR007918); Has 214 Blast hits to 214 proteins in 102 species: Archae - 0; Bacteria - 0; Metazoa - 110; Fungi - 69; Plants - 29; Viruses - 0; Other Eukaryotes - 6 (source: NCBI BLink).	Chr4:15972510-15972749[+]	240	0.461687	0.532775	0.52459	0.95151	1.3561	No	Antisense	AT4G33110	3' UTR	CDS	167	407	#N/A	#N/A	#N/A
AT5G60870	Chr5:24485655-24487824[-]	#N/A	Regulator of chromosome condensation (RCC1) family protein	Chr5:24485035-24485494[-]	460	0.630876	0.909719	0.293973	1.09679	1.84871	No	Antisense	AT5G60860	3' UTR	CDS	51	511	#N/A	#N/A	#N/A
AT4G24230	Chr4:12566631-12568846[-]	ACBP3	acyl-CoA-binding domain 3	Chr4:12565111-12566570[-]	1460	0.603535	0.537419	0.360905	1.29495	1.76539	No	Antisense	AT4G24220	3' UTR	5' UTR	125	1585	#N/A	#N/A	#N/A
AT2G04400	Chr2:1531148-1533737[+]	#N/A	Aldolase-type TIM barrel family protein	Chr2:1533748-1533987[+]	240	0.344114	0.17689	0.081096	1.06215	1.00424	No	Antisense	AT2G04410	3' UTR	3' UTR	41	281	#N/A	#N/A	#N/A
AT3G63500	Chr3:23446230-23450198[-]	#N/A	Protein of unknown function (DUF1423)	Chr3:23444940-23445879[-]	940	0.168396	0.210225	0.0744099	0.418081	0.491436	No	Antisense	AT3G63490	3' UTR	CDS	126	1066	#N/A	#N/A	#N/A
AT1G68300	Chr1:25598331-25599357[-]	#N/A	Adenine nucleotide alpha hydrolases-like superfamily protein	Chr1:25597861-25598280[-]	420	0.755811	1.06817	1.49973	1.57887	2.1849	No	Antisense	AT1G68290	3' UTR	CDS	108	528	#N/A	#N/A	#N/A
AT3G15570	Chr3:5269849-5271922[-]	#N/A	Phototropic-responsive NPH3 family protein	Chr3:5268659-5269628[-]	970	0.27742	0.16178	0.0961447	0.2847	0.800944	No	Antisense	AT3G15550	CDS	CDS	270	1240	#N/A	#N/A	#N/A
AT3G48030	Chr3:17725410-17727954[-]	#N/A	hypoxia-responsive family protein / zinc finger (C3HC4-type RING finger) family protein	Chr3:17724570-17725299[-]	730	0.323991	0.530226	0.507206	0.708101	0.930162	No	Antisense	AT3G48020	Non-overlapped	Promoter	0	609	#N/A	#N/A	#N/A
AT2G01750	Chr2:328089-332113[+]	MAP70-3	microtubule-associated proteins 70-3	Chr2:332134-332966[+]	833	0.842453	1.31871	0.57658	2.14853	2.401	No	Antisense	AT2G01755	Non-overlapped	Promoter	0	588	#N/A	#N/A	#N/A
AT1G71720	Chr1:26983721-26985990[+]	#N/A	Nucleic acid-binding proteins superfamily	Chr1:26986071-26986860[+]	790	0.240444	0.235427	0.0767332	0.255454	0.684419	No	Antisense	AT1G71730	Non-overlapped	5' UTR	0	790	#N/A	#N/A	#N/A
AT2G17510	Chr2:7609236-7616342[-]	EMB2763	ribonuclease II family protein	Chr2:7608976-7609175[-]	200	0.369349	0.377786	0.442987	0.929382	1.04989	No	Antisense	AT2G17500	3' UTR	CDS	43	243	#N/A	#N/A	#N/A
AT4G31354	Chr4:15219148-15219345[+]	#N/A	unknown protein; BEST Arabidopsis thaliana protein match is: unknown protein (TAIR:AT4G31351.1); Has 30201 Blast hits to 17322 proteins in 780 species: Archae - 12; Bacteria - 1396; Metazoa - 17338; Fungi - 3422; Plants - 5037; Viruses - 0; Other Eukaryotes - 2996 (source: NCBI BLink).	Chr4:15219456-15221305[+]	1850	0.410705	0.735151	0.425973	0.841109	1.16055	No	Antisense	AT4G31355	Non-overlapped	Promoter	0	126	#N/A	#N/A	#N/A
AT5G22820	Chr5:7623440-7626975[-]	#N/A	ARM repeat superfamily protein	Chr5:7622900-7623369[-]	470	0.336793	0.457548	0.615122	0.836162	0.949365	No	Antisense	AT5G22810	Non-overlapped	CDS	0	468	#N/A	#N/A	#N/A
AT3G63480	Chr3:23440887-23444006[-]	#N/A	ATP binding microtubule motor family protein	Chr3:23439587-23440876[-]	1290	0.468467	1.17328	0.719064	1.26068	1.31972	No	Antisense	AT3G63470	3' UTR	CDS	174	1464	#N/A	#N/A	#N/A
AT3G12640	Chr3:4014213-4017869[+]	#N/A	RNA binding (RRM/RBD/RNP motifs) family protein	Chr3:4017870-4019059[+]	1190	0.361268	0.654515	0.466302	1.09086	1.00732	No	Antisense	AT3G12650	3' UTR	Promoter	40	802	#N/A	#N/A	#N/A
AT2G22090	Chr2:9388260-9390507[-]	UBA1A	RNA-binding (RRM/RBD/RNP motifs) family protein	Chr2:9387360-9388209[-]	850	2.14781	2.22911	1.17398	4.79842	5.93494	Yes	Antisense	AT2G22080	Non-overlapped	CDS	0	824	#N/A	#N/A	#N/A
AT4G38225	Chr4:17927198-17928901[+]	#N/A	unknown protein; FUNCTIONS IN: molecular_function unknown; INVOLVED IN: biological_process unknown; LOCATED IN: chloroplast; EXPRESSED IN: 21 plant structures; EXPRESSED DURING: 13 growth stages; Has 35333 Blast hits to 34131 proteins in 2444 species: Archae - 798; Bacteria - 22429; Metazoa - 974; Fungi - 991; Plants - 531; Viruses - 0; Other Eukaryotes - 9610 (source: NCBI BLink).	Chr4:17928962-17931521[+]	2560	0.360799	0.735126	0.409166	1.1734	0.993864	No	Antisense	AT4G38230	3' UTR	Promoter	225	2775	#N/A	#N/A	#N/A
AT2G37180	Chr2:15617708-15619155[+]	RD28, PIP2;3, PIP2C	Aquaporin-like superfamily protein	Chr2:15619216-15620348[+]	1133	2.79422	2.18531	0.843706	2.41398	7.33901	No	Antisense	AT2G37190	Non-overlapped	Promoter	0	713	#N/A	#N/A	#N/A
AT2G31890	Chr2:13556500-13559767[-]	ATRAP, RAP	RAP	Chr2:13554760-13556479[-]	1720	0.386528	0.243297	0.121998	0.950996	1.00411	Yes	Antisense	AT2G31880	CDS	Promoter	478	2064	#N/A	#N/A	#N/A
AT1G31190	Chr1:11144772-11146930[+]	IMPL1	myo-inositol monophosphatase like 1	Chr1:11146931-11147570[+]	640	0.939862	0.944465	0.93989	1.55174	2.37045	No	Antisense	AT1G31200	CDS	CDS	8	648	#N/A	#N/A	#N/A
AT3G14150	Chr3:4690450-4693001[-]	#N/A	Aldolase-type TIM barrel family protein	Chr3:4689560-4690309[-]	750	0.510621	1.21866	0.52647	1.69602	1.27002	No	Antisense	AT3G14140	Non-overlapped	CDS	0	750	#N/A	#N/A	#N/A
AT2G41680	Chr2:17376155-17379055[-]	NTRC	NADPH-dependent thioredoxin reductase C	Chr2:17375765-17376074[-]	310	0.436669	0.481001	0.192952	1.17203	1.08609	No	Antisense	AT2G41670	CDS	CDS	84	394	#N/A	#N/A	#N/A
AT3G63130	Chr3:23324609-23326973[+]	RANGAP1, ATRANGAP1	RAN GTPase activating protein 1	Chr3:23327194-23327863[+]	670	0.252008	0.0867476	0.00695973	0.483517	0.626798	No	Antisense	AT3G63140	3' UTR	CDS	107	777	#N/A	#N/A	#N/A
AT5G25640	Chr5:8949849-8950331[-]	#N/A	Rhomboid-related intramembrane serine protease family protein	Chr5:8949229-8949698[-]	470	0.392925	0.494646	0.198426	0.711867	0.971703	No	Antisense	AT5G25630	Non-overlapped	CDS	0	371	#N/A	#N/A	#N/A
AT1G17870	Chr1:6149939-6152222[-]	ATEGY3, EGY3	ethylene-dependent gravitropism-deficient and yellow-green-like 3	Chr1:6148989-6149888[-]	900	0.621445	0.348726	0.113985	0.743506	1.52233	No	Antisense	AT1G17860	3' UTR	Promoter	100	688	#N/A	#N/A	#N/A
AT3G01360	Chr3:136399-138799[-]	#N/A	Family of unknown function (DUF716)	Chr3:136109-136368[-]	260	0.46676	0.625918	0.681518	1.24598	1.13065	No	Antisense	AT3G01350	CDS	CDS	1062	1322	#N/A	#N/A	#N/A
AT3G23490	Chr3:8423011-8424652[-]	CYN	cyanase	Chr3:8422511-8422940[-]	430	0.454017	0.419011	0.271106	0.852191	1.09872	No	Antisense	AT3G23480	Non-overlapped	CDS	0	406	#N/A	#N/A	#N/A
AT1G71490	Chr1:26932905-26935825[-]	#N/A	Tetratricopeptide repeat (TPR)-like superfamily protein	Chr1:26931905-26932894[-]	990	0.778138	1.40899	1.47898	1.7327	1.83995	No	Antisense	AT1G71480	CDS	Promoter	409	1364	#N/A	#N/A	#N/A
AT3G59980	Chr3:22154244-22155641[-]	#N/A	Nucleic acid-binding, OB-fold-like protein	Chr3:22153664-22154243[-]	580	0.427572	0.370771	0.112556	0.595171	1.00463	No	Antisense	AT3G59970	CDS	CDS	240	820	#N/A	#N/A	#N/A
AT1G75310	Chr1:28261004-28266124[+]	AUL1	auxin-like 1 protein	Chr1:28266625-28267064[+]	440	0.371748	0.330233	0.137771	0.844893	0.870928	No	Antisense	AT1G75330	Non-overlapped	CDS	0	440	#N/A	#N/A	#N/A
AT1G76700	Chr1:28780408-28783248[-]	#N/A	DNAJ heat shock N-terminal domain-containing protein	Chr1:28776718-28780397[-]	3680	0.675324	0.230588	0.0836302	1.30316	1.57626	No	Antisense	AT1G76680	Non-overlapped	Promoter	0	1622	#N/A	#N/A	#N/A
AT1G07900	Chr1:2442622-2443632[+]	LBD1	LOB domain-containing protein 1	Chr1:2443733-2445469[+]	1737	1.73754	2.03775	2.59593	1.95981	3.82601	No	Antisense	AT1G07901	Non-overlapped	Promoter	0	153	#N/A	#N/A	#N/A
AT2G31750	Chr2:13497233-13500023[+]	UGT74D1	UDP-glucosyl transferase 74D1	Chr2:13500044-13500723[+]	680	1.00097	1.39319	1.46748	1.51513	2.08433	No	Antisense	AT2G31751	Other noncoding gene	Other noncoding gene	683	1363	#N/A	#N/A	#N/A
AT4G16680	Chr4:9387393-9390774[-]	#N/A	P-loop containing nucleoside triphosphate hydrolases superfamily protein	Chr4:9386023-9386982[-]	960	2.3524	3.59018	3.47783	5.698	4.7901	No	Antisense	AT4G16670	CDS	CDS	362	1322	#N/A	#N/A	#N/A
AT3G54420	Chr3:20145910-20147063[+]	ATEP3, ATCHITIV, CHIV, EP3	homolog of carrot EP3-3 chitinase	Chr3:20147164-20148353[+]	1190	0.731604	0.581209	0.231192	1.58876	1.4866	No	Antisense	AT3G54430	Non-overlapped	Promoter	0	964	#N/A	#N/A	#N/A
AT5G25600	Chr5:8912959-8914055[-]	#N/A	BEST Arabidopsis thaliana protein match is: nucleic acid binding;zinc ion binding (TAIR:AT5G36228.1); Has 1807 Blast hits to 1807 proteins in 277 species: Archae - 0; Bacteria - 0; Metazoa - 736; Fungi - 347; Plants - 385; Viruses - 0; Other Eukaryotes - 339 (source: NCBI BLink).	Chr5:8912369-8912958[-]	590	0	0.019702	0.0316137	1.48521	17.8659	No	Others	#N/A	#N/A	#N/A	#N/A	#N/A	#N/A	#N/A	#N/A
AT4G13940	Chr4:8054861-8057181[+]	HOG1, EMB1395, SAHH1, MEE58, ATSAHH1	S-adenosyl-L-homocysteine hydrolase	Chr4:8057182-8057921[+]	740	0	0.0664239	0.0133229	6.09978	11.4888	No	Others	#N/A	#N/A	#N/A	#N/A	#N/A	#N/A	#N/A	#N/A
AT1G13440	Chr1:4608196-4610647[-]	GAPC-2, GAPC2	glyceraldehyde-3-phosphate dehydrogenase C2	Chr1:4607906-4608145[-]	240	0	0.0242171	0.0194292	1.15066	2.93093	No	Others	#N/A	#N/A	#N/A	#N/A	#N/A	#N/A	#N/A	#N/A
AT5G53710	Chr5:21805259-21805794[-]	#N/A	unknown protein; FUNCTIONS IN: molecular_function unknown; INVOLVED IN: biological_process unknown; LOCATED IN: endomembrane system; EXPRESSED IN: 8 plant structures; EXPRESSED DURING: 4 anthesis, C globular stage, petal differentiation and expansion stage; Has 30201 Blast hits to 17322 proteins in 780 species: Archae - 12; Bacteria - 1396; Metazoa - 17338; Fungi - 3422; Plants - 5037; Viruses - …	Chr5:21804479-21805258[-]	780	0	0.037257	0.16739	0.0272346	2.68528	No	Others	#N/A	#N/A	#N/A	#N/A	#N/A	#N/A	#N/A	#N/A
AT4G24960	Chr4:12827936-12829243[+]	ATHVA22D, HVA22D	HVA22 homologue D	Chr4:12829254-12829813[+]	560	0	0.0415149	0.0333073	0.21812	2.62471	No	Others	#N/A	#N/A	#N/A	#N/A	#N/A	#N/A	#N/A	#N/A
AT4G17230	Chr4:9660985-9663774[-]	SCL13	SCARECROW-like 13	Chr4:9660595-9660984[-]	390	0	0.0193736	0.0466302	1.36309	2.51973	No	Others	#N/A	#N/A	#N/A	#N/A	#N/A	#N/A	#N/A	#N/A
AT5G41900	Chr5:16768953-16771696[+]	#N/A	alpha/beta-Hydrolases superfamily protein	Chr5:16771697-16771976[+]	280	0	0.33212	0.36638	0.512109	2.47473	Yes	Others	#N/A	#N/A	#N/A	#N/A	#N/A	#N/A	#N/A	#N/A
AT1G78070	Chr1:29355022-29358993[+]	#N/A	Transducin/WD40 repeat-like superfamily protein	Chr1:29358994-29359543[+]	550	0	0.105674	0.0593475	0.68557	2.39565	No	Others	#N/A	#N/A	#N/A	#N/A	#N/A	#N/A	#N/A	#N/A
AT1G20450	Chr1:7088003-7089606[-]	LTI29, LTI45, ERD10	Dehydrin family protein	Chr1:7087773-7088002[-]	230	0	0.22743	0.648768	0.900519	2.32801	No	Others	#N/A	#N/A	#N/A	#N/A	#N/A	#N/A	#N/A	#N/A
AT1G04570	Chr1:1246728-1248775[-]	#N/A	Major facilitator superfamily protein	Chr1:1246528-1246727[-]	200	0	0.290605	0.0932604	0.398307	2.12602	No	Others	#N/A	#N/A	#N/A	#N/A	#N/A	#N/A	#N/A	#N/A
AT1G58602	Chr1:21746354-21765705[+]	#N/A	LRR and NB-ARC domains-containing disease resistance protein	Chr1:21765706-21766065[+]	360	0	0.0161447	0	1.06215	1.85188	No	Others	#N/A	#N/A	#N/A	#N/A	#N/A	#N/A	#N/A	#N/A
AT2G30020	Chr2:12814410-12816088[+]	#N/A	Protein phosphatase 2C family protein	Chr2:12816089-12816588[+]	500	0	0.0232484	0.0186521	0.977179	1.8478	No	Others	#N/A	#N/A	#N/A	#N/A	#N/A	#N/A	#N/A	#N/A
AT1G53170	Chr1:19821337-19822252[-]	ATERF-8, ATERF8, ERF8	ethylene response factor 8	Chr1:19819947-19821326[-]	1380	0	0.0336933	0.030411	0.33096	1.72699	No	Others	#N/A	#N/A	#N/A	#N/A	#N/A	#N/A	#N/A	#N/A
AT3G53430	Chr3:19809687-19810469[-]	#N/A	Ribosomal protein L11 family protein	Chr3:19809207-19809536[-]	330	0	0.140899	0.0423911	0.337957	1.55892	No	Others	#N/A	#N/A	#N/A	#N/A	#N/A	#N/A	#N/A	#N/A
AT1G47128	Chr1:17282825-17285670[-]	RD21, RD21A	Granulin repeat cysteine protease family protein	Chr1:17281865-17282824[-]	960	0	0	0.00485731	0.315326	1.52015	Yes	Others	#N/A	#N/A	#N/A	#N/A	#N/A	#N/A	#N/A	#N/A
AT4G33050	Chr4:15944322-15947026[-]	EDA39	calmodulin-binding family protein	Chr4:15944062-15944321[-]	260	0	0.0670626	0.0179347	1.83834	1.25179	No	Others	#N/A	#N/A	#N/A	#N/A	#N/A	#N/A	#N/A	#N/A
AT5G42390	Chr5:16945251-16953100[+]	#N/A	Insulinase (Peptidase family M16) family protein	Chr5:16953101-16953360[+]	260	0	0.0670626	0.125543	1.0213	1.2316	No	Others	#N/A	#N/A	#N/A	#N/A	#N/A	#N/A	#N/A	#N/A
AT2G05920	Chr2:2269515-2272229[-]	#N/A	Subtilase family protein	Chr2:2269305-2269514[-]	210	0	0.138383	0	0.37934	1.19987	No	Others	#N/A	#N/A	#N/A	#N/A	#N/A	#N/A	#N/A	#N/A
AT2G37220	Chr2:15634525-15636409[-]	#N/A	RNA-binding (RRM/RBD/RNP motifs) family protein	Chr2:15634275-15634494[-]	220	0	0.0528372	0.148369	0.313817	1.19305	No	Others	#N/A	#N/A	#N/A	#N/A	#N/A	#N/A	#N/A	#N/A
AT1G30760	Chr1:10918278-10920677[+]	#N/A	FAD-binding Berberine family protein	Chr1:10920678-10920897[+]	220	0	0	0	0.748334	1.19305	No	Others	#N/A	#N/A	#N/A	#N/A	#N/A	#N/A	#N/A	#N/A
AT5G13220	Chr5:4218888-4220883[+]	JAZ10, TIFY9, JAS1	jasmonate-zim-domain protein 10	Chr5:4220884-4221493[+]	610	0	0.00952802	0	0.296009	1.11013	No	Others	#N/A	#N/A	#N/A	#N/A	#N/A	#N/A	#N/A	#N/A
AT3G12360	Chr3:3934078-3936694[+]	ITN1	Ankyrin repeat family protein	Chr3:3936695-3936894[+]	200	0	0	0.0466302	0.955936	1.04989	No	Others	#N/A	#N/A	#N/A	#N/A	#N/A	#N/A	#N/A	#N/A
AT4G23740	Chr4:12366386-12369338[+]	#N/A	Leucine-rich repeat protein kinase family protein	Chr4:12369339-12369568[+]	230	0	0	0	0.092361	1.02706	No	Others	#N/A	#N/A	#N/A	#N/A	#N/A	#N/A	#N/A	#N/A
AT2G02340	Chr2:616088-617274[-]	AtPP2-B8, PP2-B8	phloem protein 2-B8	Chr2:615858-616087[-]	230	0	0.0758099	0	0.738888	1.02706	No	Others	#N/A	#N/A	#N/A	#N/A	#N/A	#N/A	#N/A	#N/A
AT3G60245	Chr3:22268746-22270006[+]	#N/A	Zinc-binding ribosomal protein family protein	Chr3:22270007-22270216[+]	210	0	0.138383	0.0222049	0.556365	1.02489	No	Others	#N/A	#N/A	#N/A	#N/A	#N/A	#N/A	#N/A	#N/A
AT4G01590	Chr4:688813-690434[-]	#N/A	unknown protein; BEST Arabidopsis thaliana protein match is: Arabidopsis protein of unknown function (DUF241) (TAIR:AT4G35680.1); Has 1908 Blast hits to 1345 proteins in 175 species: Archae - 3; Bacteria - 106; Metazoa - 494; Fungi - 346; Plants - 115; Viruses - 71; Other Eukaryotes - 773 (source: NCBI BLink).	Chr4:688423-688812[-]	390	0	0.134125	0.0478258	0.571928	1.02297	No	Others	#N/A	#N/A	#N/A	#N/A	#N/A	#N/A	#N/A	#N/A
AT1G64380	Chr1:23890646-23892173[-]	#N/A	Integrase-type DNA-binding superfamily protein	Chr1:23890266-23890645[-]	380	0	0.0458849	0.0122711	0.32144	1.02226	Yes	Others	#N/A	#N/A	#N/A	#N/A	#N/A	#N/A	#N/A	#N/A
AT4G23050	Chr4:12080060-12084256[+]	#N/A	PAS domain-containing protein tyrosine kinase family protein	Chr4:12084257-12084716[+]	460	0	0.0379049	0.030411	0.196267	1.01565	No	Others	#N/A	#N/A	#N/A	#N/A	#N/A	#N/A	#N/A	#N/A
AT4G27520	Chr4:13750440-13751905[-]	ENODL2, AtENODL2	early nodulin-like protein 2	Chr4:13750150-13750439[-]	290	0	0.0200417	0.0321587	0.238068	1.01368	No	Others	#N/A	#N/A	#N/A	#N/A	#N/A	#N/A	#N/A	#N/A
AT5G04830	Chr5:1402045-1403961[-]	#N/A	Nuclear transport factor 2 (NTF2) family protein	Chr5:1401775-1402044[-]	270	0	0.17221	0.138164	0.688431	1.011	No	Others	#N/A	#N/A	#N/A	#N/A	#N/A	#N/A	#N/A	#N/A
AT1G80120	Chr1:30139101-30140204[+]	#N/A	Protein of unknown function (DUF567)	Chr1:30140205-30140474[+]	270	0	0.0215263	0.103623	0.137686	1.011	No	Others	#N/A	#N/A	#N/A	#N/A	#N/A	#N/A	#N/A	#N/A
AT4G27410	Chr4:13707240-13709149[-]	RD26	NAC (No Apical Meristem) domain transcriptional regulator superfamily protein	Chr4:13706850-13707239[-]	390	0	0.0298056	0.0478258	0.122556	1.00951	No	Others	#N/A	#N/A	#N/A	#N/A	#N/A	#N/A	#N/A	#N/A
AT4G25433	Chr4:13001198-13001870[-]	#N/A	peptidoglycan-binding LysM domain-containing protein	Chr4:13000968-13001197[-]	230	0	0	0.020274	0.207812	1.00424	No	Others	#N/A	#N/A	#N/A	#N/A	#N/A	#N/A	#N/A	#N/A
AT4G08980	Chr4:5758105-5760558[+]	FBW2	F-BOX WITH WD-40 2	Chr4:5760559-5761008[+]	450	0	0.0129158	0	0.306844	1.00322	No	Others	#N/A	#N/A	#N/A	#N/A	#N/A	#N/A	#N/A	#N/A
AT2G29670	Chr2:12681958-12685087[-]	#N/A	Tetratricopeptide repeat (TPR)-like superfamily protein	Chr2:12680968-12681897[-]	930	0	0.0124991	0	0.177025	0.965218	No	Others	#N/A	#N/A	#N/A	#N/A	#N/A	#N/A	#N/A	#N/A
AT2G28890	Chr2:12405596-12408235[-]	PLL4	poltergeist like 4	Chr2:12405146-12405585[-]	440	0	0.0132093	0.0105978	0.410377	0.847067	No	Others	#N/A	#N/A	#N/A	#N/A	#N/A	#N/A	#N/A	#N/A
AT5G42020	Chr5:16807483-16810646[-]	BIP, BIP2	Heat shock protein 70 (Hsp 70) family protein	Chr5:16807123-16807452[-]	330	0	0.0352248	0	0.321864	0.747646	No	Others	#N/A	#N/A	#N/A	#N/A	#N/A	#N/A	#N/A	#N/A
AT1G56590	Chr1:21202020-21204742[-]	ZIP4	Clathrin adaptor complexes medium subunit family protein	Chr1:21201760-21202009[-]	250	0	0.116242	0.0373041	0.297402	0.73492	No	Others	#N/A	#N/A	#N/A	#N/A	#N/A	#N/A	#N/A	#N/A
AT4G22820	Chr4:11987705-11989006[-]	#N/A	A20/AN1-like zinc finger family protein	Chr4:11987375-11987694[-]	320	0	0.0908139	0.131147	0.248942	0.721797	No	Others	#N/A	#N/A	#N/A	#N/A	#N/A	#N/A	#N/A	#N/A
AT4G37880	Chr4:17809681-17811590[+]	#N/A	LisH/CRA/RING-U-box domains-containing protein	Chr4:17811611-17811940[+]	330	0	0.0352248	0.0141304	0.321864	0.715831	No	Others	#N/A	#N/A	#N/A	#N/A	#N/A	#N/A	#N/A	#N/A
AT3G54020	Chr3:20005733-20008254[+]	AtIPCS1	Arabidopsis Inositol phosphorylceramide synthase 1	Chr3:20008285-20009414[+]	1130	0	0.0474456	0	1.1597	0.68564	No	Others	#N/A	#N/A	#N/A	#N/A	#N/A	#N/A	#N/A	#N/A
AT3G61770	Chr3:22864543-22866407[+]	#N/A	Acid phosphatase/vanadium-dependent haloperoxidase-related protein	Chr3:22866488-22866757[+]	270	0	0.0861051	0.0345409	0.295042	0.680482	No	Others	#N/A	#N/A	#N/A	#N/A	#N/A	#N/A	#N/A	#N/A
AT5G44575	Chr5:17973838-17974998[+]	#N/A	unknown protein; FUNCTIONS IN: molecular_function unknown; INVOLVED IN: biological_process unknown; LOCATED IN: endomembrane system; Has 7 Blast hits to 7 proteins in 2 species: Archae - 0; Bacteria - 0; Metazoa - 0; Fungi - 0; Plants - 7; Viruses - 0; Other Eukaryotes - 0 (source: NCBI BLink).	Chr5:17975019-17975238[+]	220	0	0.18493	0.0847822	0.217258	0.668109	No	Others	#N/A	#N/A	#N/A	#N/A	#N/A	#N/A	#N/A	#N/A
AT5G63370	Chr5:25383906-25387252[-]	#N/A	Protein kinase superfamily protein	Chr5:25383416-25383895[-]	480	0	0.108977	0.116575	0.442563	0.656179	No	Others	#N/A	#N/A	#N/A	#N/A	#N/A	#N/A	#N/A	#N/A
AT1G70290	Chr1:26471078-26474786[-]	ATTPS8, TPS8, ATTPSC	trehalose-6-phosphatase synthase S8	Chr1:26470658-26470877[-]	220	0	0	0	0.193118	0.644248	No	Others	#N/A	#N/A	#N/A	#N/A	#N/A	#N/A	#N/A	#N/A
AT2G15880	Chr2:6918039-6920319[-]	#N/A	Leucine-rich repeat (LRR) family protein	Chr2:6917379-6917748[-]	370	0	0.0314167	0.0252055	0.358835	0.610069	No	Others	#N/A	#N/A	#N/A	#N/A	#N/A	#N/A	#N/A	#N/A
AT3G51460	Chr3:19092518-19097353[+]	RHD4	Phosphoinositide phosphatase family protein	Chr3:19097384-19097683[+]	300	0	0.116242	0.0932604	0.230133	0.507445	No	Others	#N/A	#N/A	#N/A	#N/A	#N/A	#N/A	#N/A	#N/A
AT3G02130	Chr3:380726-384405[+]	RPK2, TOAD2, CLI1	receptor-like protein kinase 2	Chr3:384426-384665[+]	240	0	0	0	0.177025	0.481198	No	Others	#N/A	#N/A	#N/A	#N/A	#N/A	#N/A	#N/A	#N/A
AT5G05140	Chr5:1519913-1522667[+]	#N/A	Transcription elongation factor (TFIIS) family protein	Chr5:1522798-1523217[+]	420	0	0	0.0555121	0.139091	0.437452	No	Others	#N/A	#N/A	#N/A	#N/A	#N/A	#N/A	#N/A	#N/A
AT2G41880	Chr2:17474619-17477223[+]	GK-1, AGK1	guanylate kinase 1	Chr2:17477244-17477493[+]	250	0	0.0464967	0.0186521	0.127458	0.419954	No	Others	#N/A	#N/A	#N/A	#N/A	#N/A	#N/A	#N/A	#N/A
AT3G44310	Chr3:15986864-15989103[+]	NIT1, ATNIT1, NITI	nitrilase 1	Chr3:15989414-15989993[+]	580	0	0	0.0321587	0.128191	0.37108	No	Others	#N/A	#N/A	#N/A	#N/A	#N/A	#N/A	#N/A	#N/A
AT1G35350	Chr1:12981251-12984583[-]	#N/A	EXS (ERD1/XPR1/SYG1) family protein	Chr1:12980551-12980910[-]	360	0	0.0322894	0.0906698	0.35405	0.349962	No	Others	#N/A	#N/A	#N/A	#N/A	#N/A	#N/A	#N/A	#N/A
AT3G46020	Chr3:16912344-16913350[-]	#N/A	RNA-binding (RRM/RBD/RNP motifs) family protein	Chr3:16911904-16912283[-]	380	0	0.015295	0	0.0698784	0.345357	No	Others	#N/A	#N/A	#N/A	#N/A	#N/A	#N/A	#N/A	#N/A
AT1G71100	Chr1:26814632-26815671[+]	RSW10	Ribose 5-phosphate isomerase, type A protein	Chr1:26815812-26816321[+]	510	0	0.0113963	0.0274295	0.114546	0.329376	No	Others	#N/A	#N/A	#N/A	#N/A	#N/A	#N/A	#N/A	#N/A
AT1G66345	Chr1:24737719-24739353[+]	#N/A	Pentatricopeptide repeat (PPR) superfamily protein	Chr1:24739504-24739763[+]	260	0	0.0528372	0	0.362097	0.310194	No	Others	#N/A	#N/A	#N/A	#N/A	#N/A	#N/A	#N/A	#N/A
AT1G47200	Chr1:17298031-17298817[-]	WPP2	WPP domain protein 2	Chr1:17297731-17297940[-]	210	0	0	0.0444097	0.177025	0.299967	No	Others	#N/A	#N/A	#N/A	#N/A	#N/A	#N/A	#N/A	#N/A
AT1G61790	Chr1:22814390-22815430[+]	#N/A	Oligosaccharyltransferase complex/magnesium transporter family protein	Chr1:22815661-22815890[+]	230	0	0.02527	0.060822	0.161632	0.25106	No	Others	#N/A	#N/A	#N/A	#N/A	#N/A	#N/A	#N/A	#N/A
AT1G26880	Chr1:9315383-9316729[-]	#N/A	Ribosomal protein L34e superfamily protein	Chr1:9315133-9315372[-]	240	0	0.0726511	0	0.154897	0.240599	No	Others	#N/A	#N/A	#N/A	#N/A	#N/A	#N/A	#N/A	#N/A
AT1G07590	Chr1:2336523-2339391[-]	#N/A	Tetratricopeptide repeat (TPR)-like superfamily protein	Chr1:2335453-2336522[-]	1070	0.0147937	0.038023	0.00435796	4.41239	18.2405	No	Others	#N/A	#N/A	#N/A	#N/A	#N/A	#N/A	#N/A	#N/A
AT3G61890	Chr3:22914154-22915325[-]	ATHB-12, ATHB12, HB-12	homeobox 12	Chr3:22913264-22914153[-]	890	0.00592856	0.0522435	0.0943082	0.238686	2.57753	No	Others	#N/A	#N/A	#N/A	#N/A	#N/A	#N/A	#N/A	#N/A
AT4G12000	Chr4:7193270-7195152[-]	#N/A	SNARE associated Golgi protein family	Chr4:7192560-7193269[-]	710	0.00743157	0.139163	0.0262705	0.665714	2.20328	No	Others	#N/A	#N/A	#N/A	#N/A	#N/A	#N/A	#N/A	#N/A
AT1G56510	Chr1:21167589-21173632[+]	WRR4, ADR2	Disease resistance protein (TIR-NBS-LRR class)	Chr1:21173633-21174342[+]	710	0.0148631	0	0.0262705	3.89705	4.06646	No	Others	#N/A	#N/A	#N/A	#N/A	#N/A	#N/A	#N/A	#N/A
AT4G04020	Chr4:1932144-1933950[+]	FIB	fibrillin	Chr4:1933951-1934780[+]	830	0.0444999	0.0560202	0.0955076	1.59963	11.1123	Yes	Others	#N/A	#N/A	#N/A	#N/A	#N/A	#N/A	#N/A	#N/A
AT1G30320	Chr1:10680246-10682954[+]	#N/A	Remorin family protein	Chr1:10682995-10683484[+]	490	0.0107682	0.0118614	0.0285491	0.357663	2.65685	No	Others	#N/A	#N/A	#N/A	#N/A	#N/A	#N/A	#N/A	#N/A
AT1G51980	Chr1:19323382-19326916[-]	#N/A	Insulinase (Peptidase family M16) protein	Chr1:19322902-19323381[-]	480	0.0119919	0.0396279	0.0105978	1.43632	2.72016	No	Others	#N/A	#N/A	#N/A	#N/A	#N/A	#N/A	#N/A	#N/A
AT3G02140	Chr3:385317-386538[-]	TMAC2, AFP4	AFP2 (ABI five-binding protein 2) family protein	Chr3:384517-385316[-]	800	0.00659552	0.0217953	0.0582877	0.398307	1.31892	No	Others	#N/A	#N/A	#N/A	#N/A	#N/A	#N/A	#N/A	#N/A
AT1G65510	Chr1:24359453-24360081[+]	#N/A	unknown protein; FUNCTIONS IN: molecular_function unknown; INVOLVED IN: N-terminal protein myristoylation; LOCATED IN: endomembrane system; EXPRESSED IN: 9 plant structures; EXPRESSED DURING: LP.06 six leaves visible, LP.04 four leaves visible, 4 anthesis, petal differentiation and expansion stage, LP.08 eight leaves visible; BEST Arabidopsis thaliana protein match is: unknown protein (TAIR:AT1G6…	Chr1:24360082-24360991[+]	910	0.00579826	0	0.0051242	0.688647	1.13641	No	Others	#N/A	#N/A	#N/A	#N/A	#N/A	#N/A	#N/A	#N/A
AT4G02370	Chr4:1042338-1043206[+]	#N/A	Protein of unknown function, DUF538	Chr4:1043217-1044516[+]	1300	0.00811757	0.0357667	0.0394563	0.428946	1.55868	Yes	Others	#N/A	#N/A	#N/A	#N/A	#N/A	#N/A	#N/A	#N/A
AT5G19875	Chr5:6718341-6718995[+]	#N/A	unknown protein; FUNCTIONS IN: molecular_function unknown; INVOLVED IN: response to oxidative stress; LOCATED IN: endomembrane system; EXPRESSED IN: 21 plant structures; EXPRESSED DURING: 13 growth stages; BEST Arabidopsis thaliana protein match is: unknown protein (TAIR:AT2G31940.1); Has 30201 Blast hits to 17322 proteins in 780 species: Archae - 12; Bacteria - 1396; Metazoa - 17338; Fungi - 342…	Chr5:6718996-6719445[+]	450	0.0117254	0.0774946	0.145072	0.684497	2.05311	No	Others	#N/A	#N/A	#N/A	#N/A	#N/A	#N/A	#N/A	#N/A
AT5G24155	Chr5:8180118-8181027[-]	#N/A	FAD/NAD(P)-binding oxidoreductase family protein	Chr5:8179748-8180067[-]	320	0.0164888	0.199791	0.0582877	0.398307	2.67393	No	Others	#N/A	#N/A	#N/A	#N/A	#N/A	#N/A	#N/A	#N/A
AT3G61580	Chr3:22786047-22787972[+]	#N/A	Fatty acid/sphingolipid desaturase	Chr3:22788033-22788602[+]	570	0.0647981	0.15295	0.139072	4.30451	9.97392	No	Others	#N/A	#N/A	#N/A	#N/A	#N/A	#N/A	#N/A	#N/A
AT3G15210	Chr3:5121422-5122562[+]	ATERF-4, ERF4, RAP2.5, ATERF4	ethylene responsive element binding factor 4	Chr3:5122613-5123872[+]	1260	0.0418763	0.0738043	0.077717	8.17266	6.1285	No	Others	#N/A	#N/A	#N/A	#N/A	#N/A	#N/A	#N/A	#N/A
AT1G07890	Chr1:2437330-2439665[+]	APX1, MEE6, CS1, ATAPX1, ATAPX01	ascorbate peroxidase 1	Chr1:2439686-2440665[+]	980	0.0496604	0.0683776	0.0768027	3.70503	7.17628	No	Others	#N/A	#N/A	#N/A	#N/A	#N/A	#N/A	#N/A	#N/A
AT5G08450	Chr5:2727821-2732893[-]	#N/A	CONTAINS InterPro DOMAIN/s: Histone deacetylation protein Rxt3 (InterPro:IPR013951); Has 34444 Blast hits to 20801 proteins in 1175 species: Archae - 64; Bacteria - 2390; Metazoa - 15568; Fungi - 3729; Plants - 1886; Viruses - 208; Other Eukaryotes - 10599 (source: NCBI BLink).	Chr5:2727181-2727810[-]	630	0.0167505	0.0553533	0.0592129	1.25604	2.40807	No	Others	#N/A	#N/A	#N/A	#N/A	#N/A	#N/A	#N/A	#N/A
AT4G36500	Chr4:17225912-17226610[-]	#N/A	unknown protein; FUNCTIONS IN: molecular_function unknown; INVOLVED IN: biological_process unknown; LOCATED IN: mitochondrion; EXPRESSED IN: 22 plant structures; EXPRESSED DURING: 13 growth stages; BEST Arabidopsis thaliana protein match is: unknown protein (TAIR:AT2G18210.1); Has 50 Blast hits to 50 proteins in 7 species: Archae - 0; Bacteria - 0; Metazoa - 0; Fungi - 0; Plants - 50; Viruses - 0…	Chr4:17224982-17225911[-]	930	0.0226943	0.0124991	0.035098	1.54183	3.25126	No	Others	#N/A	#N/A	#N/A	#N/A	#N/A	#N/A	#N/A	#N/A
AT3G56790	Chr3:21033835-21034455[-]	#N/A	RNA splicing factor-related	Chr3:21033215-21033834[-]	620	0.0170207	0.0843691	0.015042	1.77311	2.43844	No	Others	#N/A	#N/A	#N/A	#N/A	#N/A	#N/A	#N/A	#N/A
AT2G05520	Chr2:2026162-2027117[+]	GRP-3, ATGRP-3, GRP3, ATGRP3	glycine-rich protein 3	Chr2:2027188-2027507[+]	320	0.0164888	0.0726511	0.160291	0.414903	2.36224	No	Others	#N/A	#N/A	#N/A	#N/A	#N/A	#N/A	#N/A	#N/A
AT3G23820	Chr3:8603444-8605462[+]	GAE6	UDP-D-glucuronate 4-epimerase 6	Chr3:8605473-8605892[+]	420	0.0125629	0.0830299	0.0222049	0.708101	1.73731	No	Others	#N/A	#N/A	#N/A	#N/A	#N/A	#N/A	#N/A	#N/A
AT3G22380	Chr3:7912905-7919510[+]	TIC	time for coffee	Chr3:7919521-7919970[+]	450	0.0234507	0.206652	0.0828981	2.00629	3.21965	No	Others	#N/A	#N/A	#N/A	#N/A	#N/A	#N/A	#N/A	#N/A
AT2G45300	Chr2:18677311-18680072[+]	#N/A	RNA 3'-terminal phosphate cyclase/enolpyruvate transferase, alpha/beta	Chr2:18680073-18680772[+]	700	0.00753774	0.149454	0.186521	0.606944	1.00489	No	Others	#N/A	#N/A	#N/A	#N/A	#N/A	#N/A	#N/A	#N/A
AT5G17920	Chr5:5935038-5939487[+]	ATCIMS, ATMETS, ATMS1	Cobalamin-independent synthase family protein	Chr5:5939578-5939957[+]	380	0.0138853	0.0764749	0.0490844	0.894443	1.80967	No	Others	#N/A	#N/A	#N/A	#N/A	#N/A	#N/A	#N/A	#N/A
AT1G66240	Chr1:24686256-24687332[-]	ATX1, ATATX1	homolog of anti-oxidant 1	Chr1:24685766-24686245[-]	480	0.0109925	0.0968682	0.0680024	0.398307	1.33423	No	Others	#N/A	#N/A	#N/A	#N/A	#N/A	#N/A	#N/A	#N/A
AT1G01470	Chr1:172146-172948[-]	LEA14, LSR3	Late embryogenesis abundant protein	Chr1:171326-172125[-]	800	0.0197866	0.123507	0.565391	0.630652	2.25069	No	Others	#N/A	#N/A	#N/A	#N/A	#N/A	#N/A	#N/A	#N/A
AT1G10760	Chr1:3581034-3590928[-]	SEX1, SOP1, SOP, GWD1, GWD	Pyruvate phosphate dikinase, PEP/pyruvate binding domain	Chr1:3580634-3581033[-]	400	0.013191	0.174363	0.349726	0.159323	1.48296	No	Others	#N/A	#N/A	#N/A	#N/A	#N/A	#N/A	#N/A	#N/A
AT4G04640	Chr4:2350498-2352018[-]	ATPC1	ATPase, F1 complex, gamma subunit protein	Chr4:2349428-2350397[-]	970	0.0217584	0.0838859	0.0240362	2.00385	2.4353	No	Others	#N/A	#N/A	#N/A	#N/A	#N/A	#N/A	#N/A	#N/A
AT3G27925	Chr3:10366371-10368905[-]	DEGP1, Deg1	DegP protease 1	Chr3:10366031-10366370[-]	340	0.0155189	0.0170944	0.0137148	0.421736	1.72922	No	Others	#N/A	#N/A	#N/A	#N/A	#N/A	#N/A	#N/A	#N/A
AT5G24590	Chr5:8416662-8418933[-]	ANAC091, TIP	TCV-interacting protein	Chr5:8416132-8416661[-]	530	0.0099555	0.0219324	0.0175963	0.591197	1.09941	No	Others	#N/A	#N/A	#N/A	#N/A	#N/A	#N/A	#N/A	#N/A
AT5G20840	Chr5:7061103-7069219[-]	#N/A	Phosphoinositide phosphatase family protein	Chr5:7060893-7061102[-]	210	0.0251258	0.110707	0.111024	1.36562	2.7497	No	Others	#N/A	#N/A	#N/A	#N/A	#N/A	#N/A	#N/A	#N/A
AT3G12920	Chr3:4121883-4123508[-]	#N/A	SBP (S-ribonuclease binding protein) family protein	Chr3:4121293-4121872[-]	580	0.00909727	0.0100208	0.0321587	0.302164	0.986531	No	Others	#N/A	#N/A	#N/A	#N/A	#N/A	#N/A	#N/A	#N/A
AT3G48730	Chr3:18049614-18051702[+]	GSA2	glutamate-1-semialdehyde 2,1-aminomutase 2	Chr3:18051763-18052332[+]	570	0.0185137	0	0.0163615	0.437904	1.934	No	Others	#N/A	#N/A	#N/A	#N/A	#N/A	#N/A	#N/A	#N/A
AT1G02816	Chr1:621461-622469[+]	#N/A	Protein of unknown function, DUF538	Chr1:622860-623349[+]	490	0.0107682	0.0711685	0.0285491	0.335987	1.10345	No	Others	#N/A	#N/A	#N/A	#N/A	#N/A	#N/A	#N/A	#N/A
AT2G21660	Chr2:9265249-9266393[-]	ATGRP7, CCR2, GR-RBP7, GRP7	cold, circadian rhythm, and rna binding 2	Chr2:9264849-9265208[-]	360	0.0146567	0.0161447	0.0388585	0.442563	1.47276	No	Others	#N/A	#N/A	#N/A	#N/A	#N/A	#N/A	#N/A	#N/A
AT4G12040	Chr4:7214703-7215989[+]	#N/A	A20/AN1-like zinc finger family protein	Chr4:7216110-7217049[+]	940	0.0392925	0.111295	0.109134	2.64973	3.8924	No	Others	#N/A	#N/A	#N/A	#N/A	#N/A	#N/A	#N/A	#N/A
AT3G54820	Chr3:20302021-20304010[+]	PIP2D, PIP2;5	plasma membrane intrinsic protein 2;5	Chr3:20304011-20304400[+]	390	0.0135293	0.0447084	0.0597823	0.136173	1.30563	No	Others	#N/A	#N/A	#N/A	#N/A	#N/A	#N/A	#N/A	#N/A
AT2G01060	Chr2:73258-75389[-]	#N/A	myb-like HTH transcriptional regulator family protein	Chr2:72918-73257[-]	340	0.0155189	0.0683776	0.0137148	0.702894	1.40499	No	Others	#N/A	#N/A	#N/A	#N/A	#N/A	#N/A	#N/A	#N/A
AT3G12140	Chr3:3868588-3871728[-]	#N/A	Emsy N Terminus (ENT)/ plant Tudor-like domains-containing protein	Chr3:3867808-3868587[-]	780	0.0202939	0.0223542	0.0358694	0.755761	1.79692	No	Others	#N/A	#N/A	#N/A	#N/A	#N/A	#N/A	#N/A	#N/A
AT5G35460	Chr5:13672539-13674739[+]	#N/A	unknown protein; CONTAINS InterPro DOMAIN/s: Protein of unknown function DUF2838 (InterPro:IPR021261); Has 1807 Blast hits to 1807 proteins in 277 species: Archae - 0; Bacteria - 0; Metazoa - 736; Fungi - 347; Plants - 385; Viruses - 0; Other Eukaryotes - 339 (source: NCBI BLink).	Chr5:13674750-13675479[+]	730	0.101192	0.589171	0.504628	3.17918	8.7874	No	Others	#N/A	#N/A	#N/A	#N/A	#N/A	#N/A	#N/A	#N/A
AT3G49530	Chr3:18362443-18364913[-]	ANAC062, NTL6, NAC062	NAC domain containing protein 62	Chr3:18361833-18362432[-]	600	0.0202939	0	0	1.81791	1.75654	No	Others	#N/A	#N/A	#N/A	#N/A	#N/A	#N/A	#N/A	#N/A
AT2G22430	Chr2:9526095-9527830[-]	ATHB6, HB6	homeobox protein 6	Chr2:9525825-9526084[-]	260	0.0608817	0.134125	0.143477	1.14386	5.24943	No	Others	#N/A	#N/A	#N/A	#N/A	#N/A	#N/A	#N/A	#N/A
AT4G39090	Chr4:18215556-18217482[-]	RD19, RD19A	Papain family cysteine protease	Chr4:18215086-18215545[-]	460	0.0114705	0.012635	0.030411	0.150087	0.981415	No	Others	#N/A	#N/A	#N/A	#N/A	#N/A	#N/A	#N/A	#N/A
AT5G62070	Chr5:24929919-24932576[-]	IQD23	IQ-domain 23	Chr5:24929639-24929908[-]	270	0.0195423	0.0215263	0.0518113	0.668762	1.61371	No	Others	#N/A	#N/A	#N/A	#N/A	#N/A	#N/A	#N/A	#N/A
AT5G63160	Chr5:25333263-25335485[-]	BT1	BTB and TAZ domain protein 1	Chr5:25332593-25333202[-]	610	0.00864986	0	0	0.513663	0.714267	No	Others	#N/A	#N/A	#N/A	#N/A	#N/A	#N/A	#N/A	#N/A
AT3G51240	Chr3:19025192-19026872[+]	F3H, TT6, F3'H	flavanone 3-hydroxylase	Chr3:19026873-19027132[+]	260	0.0202939	0.0894168	0.0538041	0.30639	1.65559	No	Others	#N/A	#N/A	#N/A	#N/A	#N/A	#N/A	#N/A	#N/A
AT3G56290	Chr3:20878539-20879568[-]	#N/A	unknown protein; Has 39 Blast hits to 39 proteins in 15 species: Archae - 0; Bacteria - 0; Metazoa - 0; Fungi - 0; Plants - 39; Viruses - 0; Other Eukaryotes - 0 (source: NCBI BLink).	Chr3:20878289-20878538[-]	250	0.0211057	0.116242	0.0186521	1.08339	1.70082	No	Others	#N/A	#N/A	#N/A	#N/A	#N/A	#N/A	#N/A	#N/A
AT3G55850	Chr3:20721720-20725893[-]	LAF3, LAF3 ISF1	Amidohydrolase family	Chr3:20721300-20721719[-]	420	0.0125629	0.0553533	0.0999218	0.872481	1.01239	No	Others	#N/A	#N/A	#N/A	#N/A	#N/A	#N/A	#N/A	#N/A
AT2G22660	Chr2:9627408-9631081[+]	#N/A	Protein of unknown function (duplicated DUF1399)	Chr2:9631082-9631451[+]	370	0.0142606	0.0471251	0.0252055	0.502369	1.13501	No	Others	#N/A	#N/A	#N/A	#N/A	#N/A	#N/A	#N/A	#N/A
AT3G04410	Chr3:1168837-1169205[+]	#N/A	NAC (No Apical Meristem) domain transcriptional regulator superfamily protein	Chr3:1169206-1169995[+]	790	0.0467531	0.0735708	0.0354153	1.55289	3.69453	No	Others	#N/A	#N/A	#N/A	#N/A	#N/A	#N/A	#N/A	#N/A
AT5G03850	Chr5:1028340-1029121[-]	#N/A	Nucleic acid-binding, OB-fold-like protein	Chr5:1027700-1028249[-]	550	0.019187	0.0422698	0.0508693	0.579355	1.49847	No	Others	#N/A	#N/A	#N/A	#N/A	#N/A	#N/A	#N/A	#N/A
AT4G32320	Chr4:15602721-15605400[+]	APX6	ascorbate peroxidase 6	Chr4:15605401-15605730[+]	330	0.0159891	0	0	0.289678	1.24077	No	Others	#N/A	#N/A	#N/A	#N/A	#N/A	#N/A	#N/A	#N/A
AT5G63130	Chr5:25323102-25324272[+]	#N/A	Octicosapeptide/Phox/Bem1p family protein	Chr5:25324273-25324822[+]	550	0.0323046	0.770992	1.14196	1.18137	2.47473	No	Others	#N/A	#N/A	#N/A	#N/A	#N/A	#N/A	#N/A	#N/A
AT5G45260	Chr5:18326203-18332609[+]	RRS1, ATWRKY52, SLH1	Disease resistance protein (TIR-NBS-LRR class)	Chr5:18332620-18333009[+]	390	0.0270586	0.149028	0.0717387	0.994065	1.97863	No	Others	#N/A	#N/A	#N/A	#N/A	#N/A	#N/A	#N/A	#N/A
AT4G15236	Chr4:8696683-8702727[+]	#N/A	ABC-2 and Plant PDR ABC-type transporter family protein	Chr4:8702728-8703017[+]	290	0.0181945	0.340709	0.25727	0.329633	1.2671	No	Others	#N/A	#N/A	#N/A	#N/A	#N/A	#N/A	#N/A	#N/A
AT5G67480	Chr5:26930939-26933093[-]	BT4	BTB and TAZ domain protein 4	Chr5:26930459-26930878[-]	420	0.0753774	0.276766	0.521814	0.872481	5.08695	No	Others	#N/A	#N/A	#N/A	#N/A	#N/A	#N/A	#N/A	#N/A
AT1G53310	Chr1:19884027-19888369[-]	ATPPC1, PEPC1, ATPEPC1, PPC1	phosphoenolpyruvate carboxylase 1	Chr1:19883607-19884026[-]	420	0.0251258	0.0138383	0.0111024	0.252893	1.68732	No	Others	#N/A	#N/A	#N/A	#N/A	#N/A	#N/A	#N/A	#N/A
AT1G13390	Chr1:4592481-4594391[-]	#N/A	unknown protein; BEST Arabidopsis thaliana protein match is: unknown protein (TAIR:AT1G68490.1); Has 114 Blast hits to 114 proteins in 18 species: Archae - 0; Bacteria - 0; Metazoa - 0; Fungi - 0; Plants - 114; Viruses - 0; Other Eukaryotes - 0 (source: NCBI BLink).	Chr1:4592071-4592420[-]	350	0.0150755	0.033212	0.0133229	0.576596	1.00489	No	Others	#N/A	#N/A	#N/A	#N/A	#N/A	#N/A	#N/A	#N/A
AT1G77740	Chr1:29220538-29224220[+]	PIP5K2	phosphatidylinositol-4-phosphate 5-kinase 2	Chr1:29224271-29224530[+]	260	0.0405878	0.0670626	0.125543	0.674057	2.6449	No	Others	#N/A	#N/A	#N/A	#N/A	#N/A	#N/A	#N/A	#N/A
AT1G09340	Chr1:3015328-3018234[+]	CRB, CSP41B, HIP1.3	chloroplast RNA binding	Chr1:3018305-3018604[+]	300	0.0351761	0.0581209	0	1.46931	2.23976	No	Others	#N/A	#N/A	#N/A	#N/A	#N/A	#N/A	#N/A	#N/A
AT1G75230	Chr1:28234349-28236741[+]	#N/A	DNA glycosylase superfamily protein	Chr1:28236742-28237671[+]	930	0.0226943	0.0249982	0.015042	0.862284	1.445	No	Others	#N/A	#N/A	#N/A	#N/A	#N/A	#N/A	#N/A	#N/A
AT5G36160	Chr5:14233110-14235151[-]	#N/A	Tyrosine transaminase family protein	Chr5:14232880-14233079[-]	200	0.0527642	0.232484	0.303096	0.690398	3.30714	No	Others	#N/A	#N/A	#N/A	#N/A	#N/A	#N/A	#N/A	#N/A
AT1G32790	Chr1:11874704-11877387[-]	CID11	CTC-interacting domain 11	Chr1:11874434-11874703[-]	270	0.0195423	0.107631	0.0518113	0.668762	1.22487	No	Others	#N/A	#N/A	#N/A	#N/A	#N/A	#N/A	#N/A	#N/A
AT1G64350	Chr1:23881512-23883297[+]	SEH1H	Transducin/WD40 repeat-like superfamily protein	Chr1:23883308-23883617[+]	310	0.0170207	0.0749947	0.090252	0.46255	1.04989	No	Others	#N/A	#N/A	#N/A	#N/A	#N/A	#N/A	#N/A	#N/A
AT1G76170	Chr1:28584039-28586225[-]	#N/A	2-thiocytidine tRNA biosynthesis protein, TtcA	Chr1:28583469-28584018[-]	550	0.019187	0.0528372	0.0169564	0.202774	1.16442	No	Others	#N/A	#N/A	#N/A	#N/A	#N/A	#N/A	#N/A	#N/A
AT4G39890	Chr4:18505962-18507586[+]	AtRABH1c, RABH1c	RAB GTPase homolog H1C	Chr4:18507587-18508296[+]	710	0.0594526	0.0736744	0.0919468	3.59037	3.45279	Yes	Others	#N/A	#N/A	#N/A	#N/A	#N/A	#N/A	#N/A	#N/A
AT3G28940	Chr3:10968100-10969387[-]	#N/A	AIG2-like (avirulence induced gene) family protein	Chr3:10967640-10968039[-]	400	0.013191	0.0145302	0.0116575	0.557629	0.761167	No	Others	#N/A	#N/A	#N/A	#N/A	#N/A	#N/A	#N/A	#N/A
AT5G07580	Chr5:2399504-2400601[+]	#N/A	Integrase-type DNA-binding superfamily protein	Chr5:2400612-2401521[+]	910	0.0173948	0.00638691	0.0051242	0.11672	0.986431	No	Others	#N/A	#N/A	#N/A	#N/A	#N/A	#N/A	#N/A	#N/A
AT1G70730	Chr1:26668865-26673166[-]	PGM2	Phosphoglucomutase/phosphomannomutase family protein	Chr1:26668285-26668844[-]	560	0.0282665	0.228332	0.174863	0.531076	1.57483	No	Others	#N/A	#N/A	#N/A	#N/A	#N/A	#N/A	#N/A	#N/A
AT2G16405	Chr2:7105752-7108972[-]	#N/A	Transducin/WD40 repeat-like superfamily protein	Chr2:7105502-7105721[-]	220	0.0239837	0.343442	0.254346	0.675914	1.33622	No	Others	#N/A	#N/A	#N/A	#N/A	#N/A	#N/A	#N/A	#N/A
AT4G18280	Chr4:10103996-10104733[+]	#N/A	glycine-rich cell wall protein-related	Chr4:10104734-10105023[+]	290	0.0181945	0.100208	0.0160794	0.512763	1.01368	No	Others	#N/A	#N/A	#N/A	#N/A	#N/A	#N/A	#N/A	#N/A
AT5G06360	Chr5:1944768-1946743[+]	#N/A	Ribosomal protein S8e family protein	Chr5:1946754-1947113[+]	360	0.0293134	0.0322894	0	0.826118	1.60399	No	Others	#N/A	#N/A	#N/A	#N/A	#N/A	#N/A	#N/A	#N/A
AT5G48020	Chr5:19462658-19464957[-]	#N/A	2-oxoglutarate (2OG) and Fe(II)-dependent oxygenase superfamily protein	Chr5:19462148-19462647[-]	500	0.0211057	0	0.00932604	0.605426	1.15487	No	Others	#N/A	#N/A	#N/A	#N/A	#N/A	#N/A	#N/A	#N/A
AT5G56795	Chr5:22972042-22972449[-]	MT1B	metallothionein 1B	Chr5:22971552-22971851[-]	300	0.0175881	0.0581209	0.077717	0.0708101	0.962395	No	Others	#N/A	#N/A	#N/A	#N/A	#N/A	#N/A	#N/A	#N/A
AT1G07630	Chr1:2349097-2351692[+]	PLL5	pol-like 5	Chr1:2351693-2351892[+]	200	0.0263821	0.174363	0.116575	0.451414	1.41735	No	Others	#N/A	#N/A	#N/A	#N/A	#N/A	#N/A	#N/A	#N/A
AT5G66760	Chr5:26653658-26657536[+]	SDH1-1	succinate dehydrogenase 1-1	Chr5:26657537-26657806[+]	270	0.0195423	0.107631	0.77717	0.491737	1.04989	No	Others	#N/A	#N/A	#N/A	#N/A	#N/A	#N/A	#N/A	#N/A
AT1G67470	Chr1:25272182-25273576[+]	#N/A	Protein kinase superfamily protein	Chr1:25273597-25273916[+]	320	0.0170207	0.0749947	0.045126	0.736653	0.914417	No	Others	#N/A	#N/A	#N/A	#N/A	#N/A	#N/A	#N/A	#N/A
AT5G25280	Chr5:8773789-8776000[+]	#N/A	serine-rich protein-related	Chr5:8776001-8777260[+]	1260	0.0418763	0.0784171	0.0666146	0.442563	2.22059	No	Others	#N/A	#N/A	#N/A	#N/A	#N/A	#N/A	#N/A	#N/A
AT1G64370	Chr1:23888920-23889661[+]	#N/A	unknown protein; Has 773 Blast hits to 375 proteins in 118 species: Archae - 0; Bacteria - 97; Metazoa - 421; Fungi - 108; Plants - 31; Viruses - 0; Other Eukaryotes - 116 (source: NCBI BLink).	Chr1:23889792-23890301[+]	510	0.0103459	0.0797738	0.0274295	0.0728927	0.545529	No	Others	#N/A	#N/A	#N/A	#N/A	#N/A	#N/A	#N/A	#N/A
AT1G58270	Chr1:21612116-21614117[-]	ZW9	TRAF-like family protein	Chr1:21611426-21612095[-]	670	0.0157505	0.18217	0.375825	0.15853	0.822672	No	Others	#N/A	#N/A	#N/A	#N/A	#N/A	#N/A	#N/A	#N/A
AT1G68500	Chr1:25702003-25702511[+]	#N/A	unknown protein; BEST Arabidopsis thaliana protein match is: unknown protein (TAIR:AT1G25422.1); Has 16 Blast hits to 16 proteins in 6 species: Archae - 0; Bacteria - 0; Metazoa - 0; Fungi - 0; Plants - 16; Viruses - 0; Other Eukaryotes - 0 (source: NCBI BLink).	Chr1:25702522-25702731[+]	210	0.0502516	0.276766	0.643941	0.278182	2.59972	No	Others	#N/A	#N/A	#N/A	#N/A	#N/A	#N/A	#N/A	#N/A
AT1G31870	Chr1:11436719-11440109[+]	#N/A	unknown protein; FUNCTIONS IN: molecular_function unknown; INVOLVED IN: biological_process unknown; LOCATED IN: cytosol, nucleus; EXPRESSED IN: 25 plant structures; EXPRESSED DURING: 15 growth stages; CONTAINS InterPro DOMAIN/s: Protein of unknown function DUF2050, pre-mRNA-splicing factor (InterPro:IPR018609); Has 13303 Blast hits to 9618 proteins in 489 species: Archae - 8; Bacteria - 444; Meta…	Chr1:11440110-11440379[+]	270	0.0195423	0.0645788	0.0863522	0.668762	1.011	No	Others	#N/A	#N/A	#N/A	#N/A	#N/A	#N/A	#N/A	#N/A
AT1G70360	Chr1:26508778-26509325[+]	#N/A	F-box family protein	Chr1:26509736-26510305[+]	570	0.00925687	0.101967	0.0572651	0.335416	0.469686	No	Others	#N/A	#N/A	#N/A	#N/A	#N/A	#N/A	#N/A	#N/A
AT1G78410	Chr1:29502582-29503241[+]	#N/A	VQ motif-containing protein	Chr1:29503252-29503561[+]	310	0.0390846	0.150684	0.0345409	2.06529	1.92479	No	Others	#N/A	#N/A	#N/A	#N/A	#N/A	#N/A	#N/A	#N/A
AT2G37600	Chr2:15774245-15775374[-]	#N/A	Ribosomal protein L36e family protein	Chr2:15773715-15774074[-]	360	0.0146567	0.0322894	0.0518113	0.236034	0.699924	No	Others	#N/A	#N/A	#N/A	#N/A	#N/A	#N/A	#N/A	#N/A
AT5G61670	Chr5:24783504-24785945[+]	#N/A	Encodes a close homolog of the Cauliflower OR (Orange) protein. The function of OR is to induce the differentiation of proplastids or other noncolored plastids into chromoplasts for carotenoid accumulation. Both proteins contain a Cysteine-rich zinc finger domain that is highly specific to DnaJ-like molecular chaperons.	Chr5:24785966-24786335[+]	370	0.0713029	0.439834	0.239452	1.32051	3.3341	No	Others	#N/A	#N/A	#N/A	#N/A	#N/A	#N/A	#N/A	#N/A
AT2G36800	Chr2:15423380-15425016[-]	DOGT1, UGT73C5	don-glucosyltransferase 1	Chr2:15423100-15423309[-]	210	0.0251258	0.221413	0.0444097	1.54265	1.17487	No	Others	#N/A	#N/A	#N/A	#N/A	#N/A	#N/A	#N/A	#N/A
AT3G11690	Chr3:3694988-3696478[+]	#N/A	unknown protein; FUNCTIONS IN: molecular_function unknown; INVOLVED IN: biological_process unknown; LOCATED IN: chloroplast; EXPRESSED IN: 24 plant structures; EXPRESSED DURING: 15 growth stages; BEST Arabidopsis thaliana protein match is: unknown protein (TAIR:AT5G06380.1); Has 84 Blast hits to 84 proteins in 12 species: Archae - 0; Bacteria - 0; Metazoa - 0; Fungi - 0; Plants - 84; Viruses - 0;…	Chr3:3696499-3697018[+]	520	0.0202939	0.0447084	0.0807061	0.194047	0.928745	No	Others	#N/A	#N/A	#N/A	#N/A	#N/A	#N/A	#N/A	#N/A
AT1G69410	Chr1:26089202-26090386[+]	ATELF5A-3, ELF5A-3	eukaryotic elongation factor 5A-3	Chr1:26090757-26091286[+]	530	0.0099555	0	0.00879815	0.270548	0.455611	No	Others	#N/A	#N/A	#N/A	#N/A	#N/A	#N/A	#N/A	#N/A
AT5G49480	Chr5:20070743-20071638[+]	ATCP1, CP1	Ca2+-binding protein 1	Chr5:20071639-20072568[+]	930	0.0226943	0.0374974	0.020056	0.833732	1.03295	No	Others	#N/A	#N/A	#N/A	#N/A	#N/A	#N/A	#N/A	#N/A
AT5G43460	Chr5:17459873-17461751[+]	#N/A	HR-like lesion-inducing protein-related	Chr5:17461802-17462521[+]	720	0.0293134	0.0645788	0.0453349	0.339298	1.30507	No	Others	#N/A	#N/A	#N/A	#N/A	#N/A	#N/A	#N/A	#N/A
AT3G48710	Chr3:18040937-18044226[+]	#N/A	DEK domain-containing chromatin associated protein	Chr3:18044247-18044866[+]	620	0.0255311	0.121866	0.060168	0.531076	1.10915	No	Others	#N/A	#N/A	#N/A	#N/A	#N/A	#N/A	#N/A	#N/A
AT5G40340	Chr5:16131654-16134916[-]	#N/A	Tudor/PWWP/MBT superfamily protein	Chr5:16131144-16131443[-]	300	0.0175881	0.271231	0.186521	0.194728	0.752418	No	Others	#N/A	#N/A	#N/A	#N/A	#N/A	#N/A	#N/A	#N/A
AT2G38250	Chr2:16018357-16019500[+]	#N/A	Homeodomain-like superfamily protein	Chr2:16019731-16020160[+]	430	0.0122707	0.0946155	0.227729	0.592829	0.524943	No	Others	#N/A	#N/A	#N/A	#N/A	#N/A	#N/A	#N/A	#N/A
AT4G32295	Chr4:15592893-15594273[+]	#N/A	unknown protein; BEST Arabidopsis thaliana protein match is: unknown protein (TAIR:AT3G24150.1); Has 39 Blast hits to 39 proteins in 10 species: Archae - 0; Bacteria - 0; Metazoa - 0; Fungi - 0; Plants - 39; Viruses - 0; Other Eukaryotes - 0 (source: NCBI BLink).	Chr4:15594314-15594653[+]	340	0.0310378	0.102566	0.150862	0.531076	1.31236	No	Others	#N/A	#N/A	#N/A	#N/A	#N/A	#N/A	#N/A	#N/A
AT4G08960	Chr4:5746289-5748285[+]	#N/A	phosphotyrosyl phosphatase activator (PTPA) family protein	Chr4:5748296-5748715[+]	420	0.0251258	0.0415149	0.0333073	0.35405	1.03739	No	Others	#N/A	#N/A	#N/A	#N/A	#N/A	#N/A	#N/A	#N/A
AT2G29450	Chr2:12624586-12625637[-]	ATGSTU5, ATGSTU1, AT103-1A, GSTU5	glutathione S-transferase tau 5	Chr2:12624356-12624575[-]	220	0.0479674	0.0264186	0.127173	0.337957	1.95661	No	Others	#N/A	#N/A	#N/A	#N/A	#N/A	#N/A	#N/A	#N/A
AT1G45201	Chr1:17123821-17128651[+]	ATTLL1, TLL1	triacylglycerol lipase-like 1	Chr1:17128822-17129181[+]	360	0.0164888	0.199791	0.189435	0.282134	0.672583	No	Others	#N/A	#N/A	#N/A	#N/A	#N/A	#N/A	#N/A	#N/A
AT1G01080	Chr1:45296-47019[-]	#N/A	RNA-binding (RRM/RBD/RNP motifs) family protein	Chr1:44886-45275[-]	390	0.0159891	0.088062	0.0706518	0.627635	0.652202	No	Others	#N/A	#N/A	#N/A	#N/A	#N/A	#N/A	#N/A	#N/A
AT5G60850	Chr5:24480449-24481873[+]	OBP4	OBF binding protein 4	Chr5:24481874-24483033[+]	1160	0.0363891	0.150313	0.116575	0.874443	1.46169	No	Others	#N/A	#N/A	#N/A	#N/A	#N/A	#N/A	#N/A	#N/A
AT2G28550	Chr2:12225842-12228543[-]	RAP2.7	related to AP2.7	Chr2:12225642-12225841[-]	200	0.0263821	0.0581209	0.0932604	0.796613	1.04989	No	Others	#N/A	#N/A	#N/A	#N/A	#N/A	#N/A	#N/A	#N/A
AT1G79730	Chr1:30000538-30004005[-]	ELF7	hydroxyproline-rich glycoprotein family protein	Chr1:30000128-30000527[-]	400	0.0263821	0.116242	0.0582877	0.690398	1.04989	No	Others	#N/A	#N/A	#N/A	#N/A	#N/A	#N/A	#N/A	#N/A
AT3G49670	Chr3:18417568-18421106[+]	BAM2	Leucine-rich receptor-like protein kinase family protein	Chr3:18421117-18421336[+]	220	0.0239837	0.0792558	0.0635866	0.362097	0.954442	No	Others	#N/A	#N/A	#N/A	#N/A	#N/A	#N/A	#N/A	#N/A
AT5G38530	Chr5:15424038-15426470[+]	TSBtype2	tryptophan synthase beta type 2	Chr5:15426481-15426750[+]	270	0.0195423	0.0215263	0.103623	0.118017	0.777693	No	Others	#N/A	#N/A	#N/A	#N/A	#N/A	#N/A	#N/A	#N/A
AT2G33540	Chr2:14203505-14208797[-]	CPL3, ATCPL3	C-terminal domain phosphatase-like 3	Chr2:14203095-14203504[-]	410	0.0257386	0.0283517	0.136479	0.531076	1.01148	No	Others	#N/A	#N/A	#N/A	#N/A	#N/A	#N/A	#N/A	#N/A
AT1G52300	Chr1:19474898-19476234[-]	#N/A	Zinc-binding ribosomal protein family protein	Chr1:19474388-19474877[-]	490	0.0430728	0.0711685	0.0380655	0.812871	1.62839	No	Others	#N/A	#N/A	#N/A	#N/A	#N/A	#N/A	#N/A	#N/A
AT4G17895	Chr4:9939695-9942772[+]	UBP20	ubiquitin-specific protease 20	Chr4:9942873-9943172[+]	300	0.0175881	0.0581209	0.0310868	0.28324	0.664928	No	Others	#N/A	#N/A	#N/A	#N/A	#N/A	#N/A	#N/A	#N/A
AT4G34550	Chr4:16503201-16504040[+]	#N/A	BEST Arabidopsis thaliana protein match is: F-box family protein (TAIR:AT2G16365.3); Has 37 Blast hits to 37 proteins in 8 species: Archae - 0; Bacteria - 0; Metazoa - 0; Fungi - 0; Plants - 37; Viruses - 0; Other Eukaryotes - 0 (source: NCBI BLink).	Chr4:16504041-16504240[+]	200	0.0527642	0.406846	0.233151	1.75255	1.94229	No	Others	#N/A	#N/A	#N/A	#N/A	#N/A	#N/A	#N/A	#N/A
AT4G22240	Chr4:11765803-11767304[-]	#N/A	Plastid-lipid associated protein PAP / fibrillin family protein	Chr4:11765133-11765802[-]	670	0.0393763	0.0954224	0.0556778	0.467664	1.44947	No	Others	#N/A	#N/A	#N/A	#N/A	#N/A	#N/A	#N/A	#N/A
AT2G14910	Chr2:6406476-6409152[-]	#N/A	unknown protein; LOCATED IN: chloroplast; EXPRESSED IN: 24 plant structures; EXPRESSED DURING: 15 growth stages; BEST Arabidopsis thaliana protein match is: unknown protein (TAIR:AT5G14970.1); Has 605 Blast hits to 425 proteins in 102 species: Archae - 0; Bacteria - 300; Metazoa - 25; Fungi - 0; Plants - 89; Viruses - 0; Other Eukaryotes - 191 (source: NCBI BLink).	Chr2:6405966-6406465[-]	500	0.0316585	0.0232484	0.0186521	0.785992	1.15487	No	Others	#N/A	#N/A	#N/A	#N/A	#N/A	#N/A	#N/A	#N/A
AT5G59030	Chr5:23833728-23834511[-]	COPT1	copper transporter 1	Chr5:23833308-23833587[-]	280	0.0188443	0	0.0333073	0.18967	0.674927	No	Others	#N/A	#N/A	#N/A	#N/A	#N/A	#N/A	#N/A	#N/A
AT2G16700	Chr2:7244608-7245741[+]	ADF5, ATADF5	actin depolymerizing factor 5	Chr2:7245762-7246211[+]	450	0.0586269	0.167905	0.528475	0.448464	2.07644	No	Others	#N/A	#N/A	#N/A	#N/A	#N/A	#N/A	#N/A	#N/A
AT1G31170	Chr1:11133410-11134844[+]	SRX	sulfiredoxin	Chr1:11134985-11135254[+]	270	0.0390846	0.0645788	0	0.826118	1.38041	No	Others	#N/A	#N/A	#N/A	#N/A	#N/A	#N/A	#N/A	#N/A
AT4G30190	Chr4:14770499-14776058[-]	HA2	H(+)-ATPase 2	Chr4:14770029-14770458[-]	430	0.0122707	0	0.0325327	0.111155	0.427279	No	Others	#N/A	#N/A	#N/A	#N/A	#N/A	#N/A	#N/A	#N/A
AT5G45620	Chr5:18501486-18504117[+]	#N/A	Proteasome component (PCI) domain protein	Chr5:18504118-18504637[+]	520	0.0304409	0.0223542	0.00896734	0.500437	1.03979	No	Others	#N/A	#N/A	#N/A	#N/A	#N/A	#N/A	#N/A	#N/A
AT1G14685	Chr1:5042323-5044294[+]	BPC2, BBR/BPC2, ATBPC2	basic pentacysteine 2	Chr1:5044305-5044654[+]	350	0.0405878	0.156479	0.179347	1.26641	1.37293	No	Others	#N/A	#N/A	#N/A	#N/A	#N/A	#N/A	#N/A	#N/A
AT1G01240	Chr1:99894-101834[+]	#N/A	unknown protein; INVOLVED IN: N-terminal protein myristoylation; EXPRESSED IN: 17 plant structures; EXPRESSED DURING: 11 growth stages; BEST Arabidopsis thaliana protein match is: unknown protein (TAIR:AT2G46550.1); Has 95 Blast hits to 78 proteins in 16 species: Archae - 0; Bacteria - 2; Metazoa - 11; Fungi - 0; Plants - 80; Viruses - 0; Other Eukaryotes - 2 (source: NCBI BLink).	Chr1:101845-102054[+]	210	0.0251258	0.0276766	0.177639	0.126447	0.82491	No	Others	#N/A	#N/A	#N/A	#N/A	#N/A	#N/A	#N/A	#N/A
AT5G50920	Chr5:20715469-20720374[-]	CLPC, ATHSP93-V, HSP93-V, DCA1, CLPC1	CLPC homologue 1	Chr5:20715229-20715448[-]	220	0.0239837	0.0528372	0.0635866	0.603495	0.787414	No	Others	#N/A	#N/A	#N/A	#N/A	#N/A	#N/A	#N/A	#N/A
AT3G22270	Chr3:7874145-7878468[+]	#N/A	Topoisomerase II-associated protein PAT1	Chr3:7878489-7878898[+]	410	0.0514772	0.51033	0.375316	0.893761	1.66445	No	Others	#N/A	#N/A	#N/A	#N/A	#N/A	#N/A	#N/A	#N/A
AT5G24120	Chr5:8157551-8160229[-]	SIGE, SIG5, ATSIG5	sigma factor E	Chr5:8156851-8157530[-]	680	0.0310378	0.230774	0.0411443	0.632605	1.00357	No	Others	#N/A	#N/A	#N/A	#N/A	#N/A	#N/A	#N/A	#N/A
AT3G53460	Chr3:19819185-19821519[-]	CP29	chloroplast RNA-binding protein 29	Chr3:19818585-19819094[-]	510	0.0206918	0.0227925	0.0182863	0.35405	0.669045	No	Others	#N/A	#N/A	#N/A	#N/A	#N/A	#N/A	#N/A	#N/A
AT2G04940	Chr2:1736485-1740388[-]	#N/A	scramblase-related	Chr2:1736015-1736484[-]	470	0.0336793	0.0741969	0.0198426	0.881359	1.07222	No	Others	#N/A	#N/A	#N/A	#N/A	#N/A	#N/A	#N/A	#N/A
AT4G31580	Chr4:15306654-15308347[+]	SRZ-22, SRZ22, RSZP22, RSZ22, At-RSZ22	serine/arginine-rich 22	Chr4:15309058-15309487[+]	430	0.0122707	0.027033	0	0.284064	0.378447	No	Others	#N/A	#N/A	#N/A	#N/A	#N/A	#N/A	#N/A	#N/A
AT3G21510	Chr3:7578175-7579599[-]	AHP1	histidine-containing phosphotransmitter 1	Chr3:7577635-7578064[-]	430	0.0245415	0.189231	0.195196	0.358167	0.744686	No	Others	#N/A	#N/A	#N/A	#N/A	#N/A	#N/A	#N/A	#N/A
AT3G63010	Chr3:23289425-23291486[+]	ATGID1B, GID1B	alpha/beta-Hydrolases superfamily protein	Chr3:23291497-23292116[+]	620	0.0340414	0.140615	0.203067	0.428287	1.02449	No	Others	#N/A	#N/A	#N/A	#N/A	#N/A	#N/A	#N/A	#N/A
AT5G24670	Chr5:8447954-8451218[+]	#N/A	Cytidine/deoxycytidylate deaminase family protein	Chr5:8451269-8451608[+]	340	0.0620755	0.153849	0.205721	0.687274	1.85274	No	Others	#N/A	#N/A	#N/A	#N/A	#N/A	#N/A	#N/A	#N/A
AT2G39720	Chr2:16567209-16568822[-]	RHC2A	RING-H2 finger C2A	Chr2:16566439-16567138[-]	700	0.0527642	0.174363	0.279781	1.0925	1.52983	No	Others	#N/A	#N/A	#N/A	#N/A	#N/A	#N/A	#N/A	#N/A
AT3G52730	Chr3:19542931-19544264[-]	#N/A	ubiquinol-cytochrome C reductase UQCRX/QCR9-like family protein	Chr3:19542551-19542890[-]	340	0.0155189	0.0170944	0.0274295	0.171819	0.447745	No	Others	#N/A	#N/A	#N/A	#N/A	#N/A	#N/A	#N/A	#N/A
AT4G36810	Chr4:17343374-17344865[+]	GGPS1	geranylgeranyl pyrophosphate synthase 1	Chr4:17344926-17345245[+]	320	0.0494664	0.181628	0.116575	0.663844	1.41078	No	Others	#N/A	#N/A	#N/A	#N/A	#N/A	#N/A	#N/A	#N/A
AT4G08180	Chr4:5169484-5173662[+]	ORP1C	OSBP(oxysterol binding protein)-related protein 1C	Chr4:5173673-5174122[+]	450	0.093803	0.232484	0.290143	1.36899	2.65971	No	Others	#N/A	#N/A	#N/A	#N/A	#N/A	#N/A	#N/A	#N/A
AT3G15520	Chr3:5249599-5252506[-]	#N/A	Cyclophilin-like peptidyl-prolyl cis-trans isomerase family protein	Chr3:5248619-5249148[-]	530	0.0696885	0.109662	0.131972	1.08219	1.96111	No	Others	#N/A	#N/A	#N/A	#N/A	#N/A	#N/A	#N/A	#N/A
AT5G27760	Chr5:9830343-9831790[+]	#N/A	Hypoxia-responsive family protein	Chr5:9831841-9832110[+]	270	0.0263821	0.116242	0.139891	0.477968	0.73492	No	Others	#N/A	#N/A	#N/A	#N/A	#N/A	#N/A	#N/A	#N/A
AT5G57060	Chr5:23090152-23091988[+]	#N/A	FUNCTIONS IN: molecular_function unknown; INVOLVED IN: defense response to Gram-negative bacterium, cytolysis; LOCATED IN: integral to membrane; EXPRESSED IN: 22 plant structures; EXPRESSED DURING: 13 growth stages; CONTAINS InterPro DOMAIN/s: Channel forming colicin, C-terminal cytotoxic (InterPro:IPR000293); BEST Arabidopsis thaliana protein match is: Ribosomal protein L18ae family (TAIR:AT4G26…	Chr5:23092019-23092518[+]	500	0.0422113	0.116242	0.223825	0.233673	1.16537	No	Others	#N/A	#N/A	#N/A	#N/A	#N/A	#N/A	#N/A	#N/A
AT5G09870	Chr5:3073356-3078262[+]	CESA5	cellulose synthase 5	Chr5:3078283-3078712[+]	430	0.049083	0.081099	0.0867538	0.456972	1.34288	No	Others	#N/A	#N/A	#N/A	#N/A	#N/A	#N/A	#N/A	#N/A
AT5G26749	Chr5:9398015-9399267[-]	#N/A	C2H2 and C2HC zinc fingers superfamily protein	Chr5:9397805-9398004[-]	200	0.0527642	0.0871814	0.0233151	0.77006	1.41735	No	Others	#N/A	#N/A	#N/A	#N/A	#N/A	#N/A	#N/A	#N/A
AT3G10985	Chr3:3442528-3443445[+]	SAG20, WI12, ATWI-12	senescence associated gene 20	Chr3:3443566-3444145[+]	580	0.0363891	0.12025	0.0964762	0.631797	0.968429	No	Others	#N/A	#N/A	#N/A	#N/A	#N/A	#N/A	#N/A	#N/A
AT5G42060	Chr5:16818388-16818955[-]	#N/A	DEK, chromatin associated protein	Chr5:16817898-16818347[-]	450	0.0469015	0.142073	0.103623	0.578282	1.23653	No	Others	#N/A	#N/A	#N/A	#N/A	#N/A	#N/A	#N/A	#N/A
AT5G14140	Chr5:4561464-4563671[+]	#N/A	zinc ion binding;nucleic acid binding;zinc ion binding	Chr5:4563672-4564651[+]	980	0.0484569	0.124545	0.10468	0.449788	1.27486	No	Others	#N/A	#N/A	#N/A	#N/A	#N/A	#N/A	#N/A	#N/A
AT5G57950	Chr5:23460709-23462388[+]	#N/A	26S proteasome regulatory subunit, putative	Chr5:23462399-23462688[+]	290	0.0363891	0.140292	0.0160794	0.366259	0.941277	No	Others	#N/A	#N/A	#N/A	#N/A	#N/A	#N/A	#N/A	#N/A
AT1G62630	Chr1:23185912-23188593[+]	#N/A	Disease resistance protein (CC-NBS-LRR class) family	Chr1:23189094-23189423[+]	330	0.0159891	0.0176124	0.0423911	0.177025	0.413591	No	Others	#N/A	#N/A	#N/A	#N/A	#N/A	#N/A	#N/A	#N/A
AT5G40370	Chr5:16147594-16149198[-]	#N/A	Glutaredoxin family protein	Chr5:16147224-16147473[-]	250	0.14774	0.302229	0.223825	2.08182	3.75859	No	Others	#N/A	#N/A	#N/A	#N/A	#N/A	#N/A	#N/A	#N/A
AT2G42880	Chr2:17840388-17844380[-]	ATMPK20, MPK20	MAP kinase 20	Chr2:17840128-17840377[-]	250	0.0422113	0.0464967	0.0373041	0.42486	1.07088	No	Others	#N/A	#N/A	#N/A	#N/A	#N/A	#N/A	#N/A	#N/A
AT3G59530	Chr3:21993253-21995308[+]	LAP3	Calcium-dependent phosphotriesterase superfamily protein	Chr3:21995319-21995638[+]	320	0.0494664	0.0726511	0.189435	0.248942	1.24674	No	Others	#N/A	#N/A	#N/A	#N/A	#N/A	#N/A	#N/A	#N/A
AT2G16510	Chr2:7159629-7160892[-]	#N/A	ATPase, F0/V0 complex, subunit C protein	Chr2:7159349-7159618[-]	270	0.0390846	0.0861051	0.0518113	0.432728	0.972117	No	Others	#N/A	#N/A	#N/A	#N/A	#N/A	#N/A	#N/A	#N/A
AT2G41730	Chr2:17409463-17409937[+]	#N/A	unknown protein; BEST Arabidopsis thaliana protein match is: unknown protein (TAIR:AT5G24640.1); Has 25 Blast hits to 25 proteins in 5 species: Archae - 0; Bacteria - 0; Metazoa - 0; Fungi - 0; Plants - 25; Viruses - 0; Other Eukaryotes - 0 (source: NCBI BLink).	Chr2:17409948-17410307[+]	360	0.0753774	0.0664239	0.0532916	1.44149	1.8598	No	Others	#N/A	#N/A	#N/A	#N/A	#N/A	#N/A	#N/A	#N/A
AT5G44180	Chr5:17783172-17790011[+]	#N/A	Homeodomain-like transcriptional regulator	Chr5:17790022-17790291[+]	270	0.0586269	0.0645788	0.0172704	0.72777	1.43873	No	Others	#N/A	#N/A	#N/A	#N/A	#N/A	#N/A	#N/A	#N/A
AT4G14960	Chr4:8548492-8550453[-]	TUA6	Tubulin/FtsZ family protein	Chr4:8548112-8548491[-]	380	0.0416559	0.03059	0	0.265538	1.02226	No	Others	#N/A	#N/A	#N/A	#N/A	#N/A	#N/A	#N/A	#N/A
AT4G31880	Chr4:15419082-15424265[-]	#N/A	LOCATED IN: cytosol, chloroplast; EXPRESSED IN: 24 plant structures; EXPRESSED DURING: 14 growth stages; BEST Arabidopsis thaliana protein match is: Tudor/PWWP/MBT superfamily protein (TAIR:AT1G15940.1); Has 137162 Blast hits to 70781 proteins in 2973 species: Archae - 289; Bacteria - 24182; Metazoa - 56725; Fungi - 20130; Plants - 6559; Viruses - 758; Other Eukaryotes - 28519 (source: NCBI BLink…	Chr4:15418802-15419061[-]	260	0.0811757	0.201188	0.107608	0.735335	1.97863	No	Others	#N/A	#N/A	#N/A	#N/A	#N/A	#N/A	#N/A	#N/A
AT1G75370	Chr1:28276426-28279898[-]	#N/A	Sec14p-like phosphatidylinositol transfer family protein	Chr1:28276026-28276415[-]	390	0.0405878	0.10432	0.298911	0.122556	0.982585	No	Others	#N/A	#N/A	#N/A	#N/A	#N/A	#N/A	#N/A	#N/A
AT5G19230	Chr5:6467527-6468484[+]	#N/A	Glycoprotein membrane precursor GPI-anchored	Chr5:6468505-6468904[+]	400	0.0676464	0	0	1.17109	1.62867	No	Others	#N/A	#N/A	#N/A	#N/A	#N/A	#N/A	#N/A	#N/A
AT5G11060	Chr5:3510118-3513305[+]	KNAT4	KNOTTED1-like homeobox gene 4	Chr5:3513306-3513885[+]	580	0.0545836	0.430896	0.747691	0.247225	1.29426	No	Others	#N/A	#N/A	#N/A	#N/A	#N/A	#N/A	#N/A	#N/A
AT1G32230	Chr1:11612118-11616218[+]	RCD1, CEO, CEO1, ATP8, AtRCD1	WWE protein-protein interaction domain protein family	Chr1:11616219-11617598[+]	1380	0.298232	0.699136	0.43927	3.17106	7.04869	No	Others	#N/A	#N/A	#N/A	#N/A	#N/A	#N/A	#N/A	#N/A
AT3G57450	Chr3:21261934-21262622[+]	#N/A	unknown protein; Has 65 Blast hits to 65 proteins in 11 species: Archae - 0; Bacteria - 0; Metazoa - 0; Fungi - 0; Plants - 65; Viruses - 0; Other Eukaryotes - 0 (source: NCBI BLink).	Chr3:21262643-21262912[+]	270	0.0195423	0.0861051	0	0.0983473	0.447174	No	Others	#N/A	#N/A	#N/A	#N/A	#N/A	#N/A	#N/A	#N/A
AT3G23750	Chr3:8558332-8561428[+]	#N/A	Leucine-rich repeat protein kinase family protein	Chr3:8561549-8561778[+]	230	0.0458819	0.10108	0.060822	0.646527	1.02706	No	Others	#N/A	#N/A	#N/A	#N/A	#N/A	#N/A	#N/A	#N/A
AT4G17040	Chr4:9585705-9589362[-]	CLPR4	CLP protease R subunit 4	Chr4:9585045-9585594[-]	550	0.0383739	0.0528372	0.0339129	0.318645	0.858997	No	Others	#N/A	#N/A	#N/A	#N/A	#N/A	#N/A	#N/A	#N/A
AT4G20880	Chr4:11179115-11180799[-]	#N/A	ethylene-responsive nuclear protein / ethylene-regulated nuclear protein (ERT2)	Chr4:11178815-11179094[-]	280	0.0376887	0.124545	0.149883	0.265538	0.843658	No	Others	#N/A	#N/A	#N/A	#N/A	#N/A	#N/A	#N/A	#N/A
AT4G27960	Chr4:13915820-13917420[-]	UBC9	ubiquitin conjugating enzyme 9	Chr4:13915530-13915799[-]	270	0.0586269	0.107631	0.138164	0.511406	1.30264	No	Others	#N/A	#N/A	#N/A	#N/A	#N/A	#N/A	#N/A	#N/A
AT3G49010	Chr3:18166769-18168692[-]	ATBBC1, BBC1, RSU2	breast basic conserved 1	Chr3:18166419-18166758[-]	340	0.0465566	0	0.0137148	0.234298	1.03445	No	Others	#N/A	#N/A	#N/A	#N/A	#N/A	#N/A	#N/A	#N/A
AT1G52825	Chr1:19670489-19670967[-]	#N/A	unknown protein; FUNCTIONS IN: molecular_function unknown; INVOLVED IN: biological_process unknown; LOCATED IN: endomembrane system; CONTAINS InterPro DOMAIN/s: Protein of unknown function DUF2346 (InterPro:IPR018625); BEST Arabidopsis thaliana protein match is: unknown protein (TAIR:AT4G14615.1); Has 52 Blast hits to 49 proteins in 19 species: Archae - 0; Bacteria - 0; Metazoa - 0; Fungi - 0; Pl…	Chr1:19668889-19669088[-]	200	0.0263821	0.0581209	0.0233151	0.318645	0.577437	No	Others	#N/A	#N/A	#N/A	#N/A	#N/A	#N/A	#N/A	#N/A
AT3G25780	Chr3:9409290-9410567[+]	AOC3	allene oxide cyclase 3	Chr3:9410598-9411027[+]	430	0.0736244	0.027033	0.0542211	0.802789	1.58704	No	Others	#N/A	#N/A	#N/A	#N/A	#N/A	#N/A	#N/A	#N/A
AT2G02230	Chr2:590221-591650[-]	AtPP2-B1, PP2-B1	phloem protein 2-B1	Chr2:589781-590150[-]	370	0.0713029	0.109958	0.0882193	0.67461	1.53227	No	Others	#N/A	#N/A	#N/A	#N/A	#N/A	#N/A	#N/A	#N/A
AT1G47395	Chr1:17383034-17383408[+]	#N/A	unknown protein; FUNCTIONS IN: molecular_function unknown; INVOLVED IN: biological_process unknown; LOCATED IN: endomembrane system; BEST Arabidopsis thaliana protein match is: unknown protein (TAIR:AT1G47400.1); Has 9 Blast hits to 9 proteins in 2 species: Archae - 0; Bacteria - 0; Metazoa - 0; Fungi - 0; Plants - 9; Viruses - 0; Other Eukaryotes - 0 (source: NCBI BLink).	Chr1:17383559-17384118[+]	560	0.0188443	0.0518937	0.0333073	0.265538	0.403081	No	Others	#N/A	#N/A	#N/A	#N/A	#N/A	#N/A	#N/A	#N/A
AT1G07280	Chr1:2238087-2241217[+]	#N/A	Tetratricopeptide repeat (TPR)-like superfamily protein	Chr1:2241228-2241437[+]	210	0.0753774	0.110707	0.222049	0.328761	1.59983	No	Others	#N/A	#N/A	#N/A	#N/A	#N/A	#N/A	#N/A	#N/A
AT1G04620	Chr1:1282741-1286584[-]	#N/A	coenzyme F420 hydrogenase family / dehydrogenase, beta subunit family	Chr1:1282151-1282710[-]	560	0.207288	0.591588	0.957584	1.69755	4.3964	No	Others	#N/A	#N/A	#N/A	#N/A	#N/A	#N/A	#N/A	#N/A
AT5G38240	Chr5:15277239-15279317[-]	#N/A	Protein kinase family protein	Chr5:15276999-15277198[-]	200	0.184675	0.988056	1.49217	2.04464	3.91082	No	Others	#N/A	#N/A	#N/A	#N/A	#N/A	#N/A	#N/A	#N/A
AT5G35100	Chr5:13360283-13361390[-]	#N/A	Cyclophilin-like peptidyl-prolyl cis-trans isomerase family protein	Chr5:13359273-13360262[-]	990	0.0479674	0.199607	0.0565214	0.665186	1.01277	No	Others	#N/A	#N/A	#N/A	#N/A	#N/A	#N/A	#N/A	#N/A
AT4G08520	Chr4:5417348-5420530[+]	#N/A	SNARE-like superfamily protein	Chr4:5420541-5420850[+]	310	0.0510621	0.0374974	0.045126	0.394024	1.06682	No	Others	#N/A	#N/A	#N/A	#N/A	#N/A	#N/A	#N/A	#N/A
AT3G55980	Chr3:20776295-20778842[+]	SZF1, ATSZF1	salt-inducible zinc finger 1	Chr3:20778843-20779062[+]	220	0.0479674	0	0	0.844893	1.00216	No	Others	#N/A	#N/A	#N/A	#N/A	#N/A	#N/A	#N/A	#N/A
AT5G01920	Chr5:359107-362904[+]	STN8	Protein kinase superfamily protein	Chr5:362985-363224[+]	240	0.0439701	0.217953	0.0971462	0.531076	0.91865	No	Others	#N/A	#N/A	#N/A	#N/A	#N/A	#N/A	#N/A	#N/A
AT3G18490	Chr3:6348755-6350668[-]	#N/A	Eukaryotic aspartyl protease family protein	Chr3:6348475-6348724[-]	250	0.105528	0.325477	0.298433	0.509833	2.18376	No	Others	#N/A	#N/A	#N/A	#N/A	#N/A	#N/A	#N/A	#N/A
AT5G03670	Chr5:947146-950171[+]	#N/A	unknown protein; BEST Arabidopsis thaliana protein match is: unknown protein (TAIR:AT2G36420.1); Has 700 Blast hits to 624 proteins in 104 species: Archae - 0; Bacteria - 18; Metazoa - 333; Fungi - 60; Plants - 73; Viruses - 24; Other Eukaryotes - 192 (source: NCBI BLink).	Chr5:950182-950491[+]	310	0.0510621	0.0937434	0.045126	0.46255	1.03295	No	Others	#N/A	#N/A	#N/A	#N/A	#N/A	#N/A	#N/A	#N/A
AT3G60750	Chr3:22453696-22457152[+]	#N/A	Transketolase	Chr3:22457413-22458042[+]	630	0.0502516	0.221413	0.0740162	0.699671	0.974894	No	Others	#N/A	#N/A	#N/A	#N/A	#N/A	#N/A	#N/A	#N/A
AT2G44670	Chr2:18425180-18426060[+]	#N/A	Protein of unknown function (DUF581)	Chr2:18426071-18426280[+]	210	0.0502516	0.0830299	0.0666146	0.227604	0.974894	No	Others	#N/A	#N/A	#N/A	#N/A	#N/A	#N/A	#N/A	#N/A
AT1G44750	Chr1:16892639-16895465[+]	ATPUP11, PUP11	purine permease 11	Chr1:16895466-16896105[+]	640	0.107177	0.208872	0.131147	0.738527	2.02595	No	Others	#N/A	#N/A	#N/A	#N/A	#N/A	#N/A	#N/A	#N/A
AT5G03240	Chr5:771725-773515[-]	UBQ3	polyubiquitin 3	Chr5:771495-771694[-]	200	0.0263821	0.0581209	0.0466302	0.132769	0.498696	No	Others	#N/A	#N/A	#N/A	#N/A	#N/A	#N/A	#N/A	#N/A
AT1G68810	Chr1:25861123-25863120[+]	#N/A	basic helix-loop-helix (bHLH) DNA-binding superfamily protein	Chr1:25863181-25863430[+]	250	0.0239837	0.0792558	0.169564	0.700054	0.45336	No	Others	#N/A	#N/A	#N/A	#N/A	#N/A	#N/A	#N/A	#N/A
AT4G30760	Chr4:14982522-14983421[+]	#N/A	Putative endonuclease or glycosyl hydrolase	Chr4:14983472-14983701[+]	230	0.0229409	0.0758099	0.020274	0.369444	0.433648	No	Others	#N/A	#N/A	#N/A	#N/A	#N/A	#N/A	#N/A	#N/A
AT1G05700	Chr1:1709796-1713245[+]	#N/A	Leucine-rich repeat transmembrane protein kinase protein	Chr1:1713386-1713745[+]	360	0.0146567	0	0	0.0295042	0.277053	No	Others	#N/A	#N/A	#N/A	#N/A	#N/A	#N/A	#N/A	#N/A
AT5G20700	Chr5:7005844-7007117[-]	#N/A	Protein of unknown function (DUF581)	Chr5:7005444-7005713[-]	270	0.136796	2.02347	1.53707	1.80959	2.56639	No	Others	#N/A	#N/A	#N/A	#N/A	#N/A	#N/A	#N/A	#N/A
AT1G08190	Chr1:2567475-2573393[+]	ATVPS41, ZIP2, VPS41, ATVAM2, VAM2	vacuolar protein sorting 41	Chr1:2573404-2573623[+]	220	0.0719512	0.0792558	0.105978	0.506936	1.33622	No	Others	#N/A	#N/A	#N/A	#N/A	#N/A	#N/A	#N/A	#N/A
AT5G13310	Chr5:4263493-4265337[+]	#N/A	unknown protein; FUNCTIONS IN: molecular_function unknown; INVOLVED IN: biological_process unknown; LOCATED IN: chloroplast; EXPRESSED IN: 13 plant structures; EXPRESSED DURING: 7 growth stages; BEST Arabidopsis thaliana protein match is: unknown protein (TAIR:AT5G13970.1); Has 1807 Blast hits to 1807 proteins in 277 species: Archae - 0; Bacteria - 0; Metazoa - 736; Fungi - 347; Plants - 385; Vir…	Chr5:4265358-4266017[+]	660	0.0479674	0.114481	0.0847822	0.37819	0.874905	No	Others	#N/A	#N/A	#N/A	#N/A	#N/A	#N/A	#N/A	#N/A
AT1G68490	Chr1:25693449-25695476[+]	#N/A	unknown protein; FUNCTIONS IN: molecular_function unknown; INVOLVED IN: biological_process unknown; LOCATED IN: chloroplast; EXPRESSED IN: 22 plant structures; EXPRESSED DURING: 13 growth stages; BEST Arabidopsis thaliana protein match is: unknown protein (TAIR:AT1G13390.2); Has 125 Blast hits to 125 proteins in 18 species: Archae - 0; Bacteria - 0; Metazoa - 0; Fungi - 0; Plants - 125; Viruses -…	Chr1:25695567-25696216[+]	650	0.0487054	0.169892	0.172173	0.759847	0.864137	No	Others	#N/A	#N/A	#N/A	#N/A	#N/A	#N/A	#N/A	#N/A
AT3G50930	Chr3:18929526-18931839[+]	BCS1	cytochrome BC1 synthesis	Chr3:18931850-18932129[+]	280	0.056533	0.103787	0.149883	0.682811	0.993642	No	Others	#N/A	#N/A	#N/A	#N/A	#N/A	#N/A	#N/A	#N/A
AT1G27330	Chr1:9492964-9494069[+]	#N/A	Ribosome associated membrane protein RAMP4	Chr1:9494180-9494539[+]	360	0.162351	0.111771	0.107608	1.42982	2.84681	No	Others	#N/A	#N/A	#N/A	#N/A	#N/A	#N/A	#N/A	#N/A
AT5G52060	Chr5:21152214-21154244[-]	ATBAG1, BAG1	BCL-2-associated athanogene 1	Chr5:21151684-21152173[-]	490	0.0861456	0.142337	0.123713	0.509399	1.51055	No	Others	#N/A	#N/A	#N/A	#N/A	#N/A	#N/A	#N/A	#N/A
AT4G23170	Chr4:12135093-12136157[+]	EP1, CRK9	receptor-like protein kinase-related family protein	Chr4:12136188-12136787[+]	600	0.0615582	0.21311	0.194292	0.690398	1.06738	No	Others	#N/A	#N/A	#N/A	#N/A	#N/A	#N/A	#N/A	#N/A
AT1G72750	Chr1:27383365-27384524[+]	ATTIM23-2, TIM23-2	translocase inner membrane subunit 23-2	Chr1:27384525-27385384[+]	860	0.0981659	0.42577	0.173508	0.821315	1.67249	No	Others	#N/A	#N/A	#N/A	#N/A	#N/A	#N/A	#N/A	#N/A
AT4G26550	Chr4:13402515-13404345[-]	#N/A	Got1/Sft2-like vescicle transport protein family	Chr4:13402225-13402484[-]	260	0.0405878	0.0670626	0.0358694	0.367668	0.686464	No	Others	#N/A	#N/A	#N/A	#N/A	#N/A	#N/A	#N/A	#N/A
AT4G16500	Chr4:9301388-9302022[-]	#N/A	Cystatin/monellin superfamily protein	Chr4:9300468-9301267[-]	800	0.0791463	0.108977	0.134062	0.736867	1.31236	No	Others	#N/A	#N/A	#N/A	#N/A	#N/A	#N/A	#N/A	#N/A
AT1G75810	Chr1:28461664-28462366[+]	#N/A	unknown protein; FUNCTIONS IN: molecular_function unknown; INVOLVED IN: biological_process unknown; LOCATED IN: endomembrane system; EXPRESSED IN: 24 plant structures; EXPRESSED DURING: 15 growth stages; Has 13 Blast hits to 13 proteins in 5 species: Archae - 0; Bacteria - 0; Metazoa - 0; Fungi - 0; Plants - 13; Viruses - 0; Other Eukaryotes - 0 (source: NCBI BLink).	Chr1:28462367-28462646[+]	280	0.0608817	0.178834	0.179347	1.08258	1.00951	No	Others	#N/A	#N/A	#N/A	#N/A	#N/A	#N/A	#N/A	#N/A
AT5G39050	Chr5:15634586-15636065[+]	#N/A	HXXXD-type acyl-transferase family protein	Chr5:15636216-15636425[+]	210	0.0502516	0	0.0222049	0.151736	0.82491	No	Others	#N/A	#N/A	#N/A	#N/A	#N/A	#N/A	#N/A	#N/A
AT5G06300	Chr5:1921744-1925370[-]	#N/A	Putative lysine decarboxylase family protein	Chr5:1921414-1921703[-]	290	0.153896	0.121085	0.213722	2.19069	2.49348	No	Others	#N/A	#N/A	#N/A	#N/A	#N/A	#N/A	#N/A	#N/A
AT2G41890	Chr2:17478058-17480352[-]	#N/A	curculin-like (mannose-binding) lectin family protein / PAN domain-containing protein	Chr2:17477268-17477897[-]	630	0.108878	0.0369022	0.0592129	0.598514	1.74148	No	Others	#N/A	#N/A	#N/A	#N/A	#N/A	#N/A	#N/A	#N/A
AT4G26410	Chr4:13346654-13349016[+]	#N/A	Uncharacterised conserved protein UCP022280	Chr4:13349057-13349696[+]	640	0.0494664	0.0726511	0.0291439	0.190855	0.787414	No	Others	#N/A	#N/A	#N/A	#N/A	#N/A	#N/A	#N/A	#N/A
AT1G78370	Chr1:29484269-29485290[-]	ATGSTU20, GSTU20	glutathione S-transferase TAU 20	Chr1:29483989-29484208[-]	220	0.0239837	0	0.0211955	0	0.381777	No	Others	#N/A	#N/A	#N/A	#N/A	#N/A	#N/A	#N/A	#N/A
AT3G06410	Chr3:1947240-1949789[-]	#N/A	Zinc finger C-x8-C-x5-C-x3-H type family protein	Chr3:1946990-1947219[-]	230	0.0688228	0.17689	0.060822	0.507985	1.07271	No	Others	#N/A	#N/A	#N/A	#N/A	#N/A	#N/A	#N/A	#N/A
AT3G07350	Chr3:2347468-2348791[+]	#N/A	Protein of unknown function (DUF506)	Chr3:2348822-2349261[+]	440	0.0959349	0.0660465	0.0635866	0.410377	1.47938	No	Others	#N/A	#N/A	#N/A	#N/A	#N/A	#N/A	#N/A	#N/A
AT2G03890	Chr2:1185522-1188545[+]	ATPI4K GAMMA 7, UBDK GAMMA 7, PI4K GAMMA 7	phosphoinositide 4-kinase gamma 7	Chr2:1188576-1189095[+]	520	0.111617	0.122948	0.0627714	0.531076	1.68587	No	Others	#N/A	#N/A	#N/A	#N/A	#N/A	#N/A	#N/A	#N/A
AT1G49000	Chr1:18123459-18124165[-]	#N/A	unknown protein; FUNCTIONS IN: molecular_function unknown; INVOLVED IN: biological_process unknown; LOCATED IN: chloroplast; EXPRESSED IN: stem; BEST Arabidopsis thaliana protein match is: unknown protein (TAIR:AT3G18560.1); Has 105 Blast hits to 105 proteins in 13 species: Archae - 0; Bacteria - 0; Metazoa - 0; Fungi - 0; Plants - 105; Viruses - 0; Other Eukaryotes - 0 (source: NCBI BLink).	Chr1:18123059-18123388[-]	330	0.0799457	0.405085	0.169564	0.547169	1.19305	Yes	Others	#N/A	#N/A	#N/A	#N/A	#N/A	#N/A	#N/A	#N/A
AT3G63120	Chr3:23322956-23324247[-]	CYCP1;1	cyclin p1;1	Chr3:23322096-23322945[-]	850	0.130359	0.765829	1.00392	0.581059	1.92067	No	Others	#N/A	#N/A	#N/A	#N/A	#N/A	#N/A	#N/A	#N/A
AT5G47120	Chr5:19136023-19137942[+]	ATBI-1, BI-1, ATBI1, BI1	BAX inhibitor 1	Chr5:19137963-19138262[+]	300	0.0703522	0.154989	0.170977	0.336348	1.01489	No	Others	#N/A	#N/A	#N/A	#N/A	#N/A	#N/A	#N/A	#N/A
AT4G30750	Chr4:14981186-14982354[-]	#N/A	unknown protein; BEST Arabidopsis thaliana protein match is: unknown protein (TAIR:AT4G30730.1); Has 30201 Blast hits to 17322 proteins in 780 species: Archae - 12; Bacteria - 1396; Metazoa - 17338; Fungi - 3422; Plants - 5037; Viruses - 0; Other Eukaryotes - 2996 (source: NCBI BLink).	Chr4:14980706-14981175[-]	470	0.0785849	0.0618308	0.0496066	0.610172	1.12807	No	Others	#N/A	#N/A	#N/A	#N/A	#N/A	#N/A	#N/A	#N/A
AT5G52070	Chr5:21161311-21165025[+]	#N/A	Agenet domain-containing protein	Chr5:21165106-21165895[+]	790	0.0801481	0.242784	0.200687	0.78653	1.14956	No	Others	#N/A	#N/A	#N/A	#N/A	#N/A	#N/A	#N/A	#N/A
AT5G62880	Chr5:25237134-25239174[+]	ARAC10, ATRAC10, ATROP11, RAC10	RAC-like 10	Chr5:25239195-25239554[+]	360	0.0732836	0.0645788	0.116575	0.413059	1.0353	No	Others	#N/A	#N/A	#N/A	#N/A	#N/A	#N/A	#N/A	#N/A
AT2G40340	Chr2:16848438-16850487[-]	DREB2C, AtERF48	Integrase-type DNA-binding superfamily protein	Chr2:16848158-16848417[-]	260	0.0811757	0.0223542	0.197282	0.388094	1.09027	No	Others	#N/A	#N/A	#N/A	#N/A	#N/A	#N/A	#N/A	#N/A
AT5G19690	Chr5:6652516-6658411[+]	STT3A	staurosporin and temperature sensitive 3-like A	Chr5:6658522-6658731[+]	210	0.0502516	0.110707	0.0888194	0.278182	0.674927	No	Others	#N/A	#N/A	#N/A	#N/A	#N/A	#N/A	#N/A	#N/A
AT3G27220	Chr3:10051612-10053678[-]	#N/A	Galactose oxidase/kelch repeat superfamily protein	Chr3:10051162-10051381[-]	220	0.0479674	0.0528372	0.0635866	0.241398	0.644248	No	Others	#N/A	#N/A	#N/A	#N/A	#N/A	#N/A	#N/A	#N/A
AT2G18020	Chr2:7837102-7838304[+]	EMB2296	Ribosomal protein L2 family	Chr2:7838325-7838624[+]	300	0.0351761	0	0.0466302	0.336348	0.472449	No	Others	#N/A	#N/A	#N/A	#N/A	#N/A	#N/A	#N/A	#N/A
AT3G23230	Chr3:8289647-8290066[-]	#N/A	Integrase-type DNA-binding superfamily protein	Chr3:8289377-8289626[-]	250	0.14774	0.162739	0.690127	2.40046	1.95279	No	Others	#N/A	#N/A	#N/A	#N/A	#N/A	#N/A	#N/A	#N/A
AT3G27160	Chr3:10017476-10019090[+]	GHS1	Ribosomal protein S21 family protein	Chr3:10019141-10019380[+]	240	0.0879403	0.0968682	0.0582877	0.508947	1.15925	No	Others	#N/A	#N/A	#N/A	#N/A	#N/A	#N/A	#N/A	#N/A
AT3G49780	Chr3:18465679-18466376[+]	ATPSK4, ATPSK3 (FORMER SYMBOL), PSK4	phytosulfokine 4 precursor	Chr3:18466597-18467656[+]	1060	0.0547553	0.00548311	0	0.435883	0.718082	No	Others	#N/A	#N/A	#N/A	#N/A	#N/A	#N/A	#N/A	#N/A
AT5G53580	Chr5:21765054-21767000[-]	#N/A	NAD(P)-linked oxidoreductase superfamily protein	Chr5:21764794-21765023[-]	230	0.0688228	0.02527	0.020274	0.277083	0.890121	No	Others	#N/A	#N/A	#N/A	#N/A	#N/A	#N/A	#N/A	#N/A
AT5G67370	Chr5:26877553-26879542[-]	#N/A	Protein of unknown function (DUF1230)	Chr5:26877253-26877512[-]	260	0.0608817	0.312959	0.197282	0.040852	0.787414	No	Others	#N/A	#N/A	#N/A	#N/A	#N/A	#N/A	#N/A	#N/A
AT4G15230	Chr4:8680182-8686880[+]	ATPDR2, PDR2	pleiotropic drug resistance 2	Chr4:8686991-8687390[+]	400	0.0439701	0.169519	0.0971462	0.464691	0.568688	No	Others	#N/A	#N/A	#N/A	#N/A	#N/A	#N/A	#N/A	#N/A
AT1G55250	Chr1:20607030-20612410[+]	HUB2	histone mono-ubiquitination 2	Chr1:20612601-20612880[+]	280	0.0376887	0.0830299	0.0499609	0.227604	0.487447	No	Others	#N/A	#N/A	#N/A	#N/A	#N/A	#N/A	#N/A	#N/A
AT5G24990	Chr5:8610537-8611694[+]	#N/A	Protein of unknown function (DUF1336)	Chr5:8611695-8612024[+]	330	0.0799457	0.264186	0.0989125	0.337957	1.01807	No	Others	#N/A	#N/A	#N/A	#N/A	#N/A	#N/A	#N/A	#N/A
AT5G48655	Chr5:19731150-19733043[-]	#N/A	RING/U-box superfamily protein	Chr5:19730010-19731129[-]	1120	0.0942217	0.192007	0.104085	0.265538	1.16706	No	Others	#N/A	#N/A	#N/A	#N/A	#N/A	#N/A	#N/A	#N/A
AT4G06746	Chr4:4073962-4074545[-]	RAP2.9, DEAR5	related to AP2 9	Chr4:4073522-4073861[-]	340	0.0620755	0.0854719	0.0685738	0.296778	0.741096	No	Others	#N/A	#N/A	#N/A	#N/A	#N/A	#N/A	#N/A	#N/A
AT1G51310	Chr1:19018979-19021804[-]	#N/A	transferases;tRNA (5-methylaminomethyl-2-thiouridylate)-methyltransferases	Chr1:19018689-19018938[-]	250	0.0422113	0	0	0.276159	0.503945	No	Others	#N/A	#N/A	#N/A	#N/A	#N/A	#N/A	#N/A	#N/A
AT5G47700	Chr5:19327803-19328983[-]	#N/A	60S acidic ribosomal protein family	Chr5:19327473-19327752[-]	280	0.188443	0.269847	0.149883	0.398307	2.15602	No	Others	#N/A	#N/A	#N/A	#N/A	#N/A	#N/A	#N/A	#N/A
AT3G13800	Chr3:4538767-4541487[+]	#N/A	Metallo-hydrolase/oxidoreductase superfamily protein	Chr3:4541498-4541797[+]	300	0.0727782	0.2405	0.0321587	0.879022	0.832668	No	Others	#N/A	#N/A	#N/A	#N/A	#N/A	#N/A	#N/A	#N/A
AT2G15090	Chr2:6542256-6543947[+]	KCS8	3-ketoacyl-CoA synthase 8	Chr2:6543968-6544247[+]	280	0.13191	0.0622724	0.149883	0.208637	1.49984	No	Others	#N/A	#N/A	#N/A	#N/A	#N/A	#N/A	#N/A	#N/A
AT2G18630	Chr2:8080503-8082698[+]	#N/A	Protein of unknown function (DUF677)	Chr2:8082709-8082908[+]	200	0.0791463	0.203423	0.0932604	0.345199	0.892403	No	Others	#N/A	#N/A	#N/A	#N/A	#N/A	#N/A	#N/A	#N/A
AT4G04910	Chr4:2489417-2495766[-]	NSF	AAA-type ATPase family protein	Chr4:2489157-2489386[-]	230	0.0917638	0.0758099	0.060822	0.438715	1.02706	No	Others	#N/A	#N/A	#N/A	#N/A	#N/A	#N/A	#N/A	#N/A
AT5G42920	Chr5:17206151-17209545[-]	THO5, AtTHO5	THO complex, subunit 5	Chr5:17205641-17206110[-]	470	0.0449057	0.111295	0.0892918	0.361583	0.502605	No	Others	#N/A	#N/A	#N/A	#N/A	#N/A	#N/A	#N/A	#N/A
AT3G13600	Chr3:4445102-4447383[+]	#N/A	calmodulin-binding family protein	Chr3:4447494-4447813[+]	320	0.197866	0.672023	0.728597	0.945978	2.16539	No	Others	#N/A	#N/A	#N/A	#N/A	#N/A	#N/A	#N/A	#N/A
AT2G47510	Chr2:19498368-19502246[+]	FUM1	fumarase 1	Chr2:19502267-19502516[+]	250	0.105528	0.13949	0.223825	0.743506	1.15487	No	Others	#N/A	#N/A	#N/A	#N/A	#N/A	#N/A	#N/A	#N/A
AT4G08210	Chr4:5183813-5185873[-]	#N/A	Pentatricopeptide repeat (PPR-like) superfamily protein	Chr4:5183173-5183752[-]	580	0.0909727	0.410855	0.25727	0.833239	0.995581	No	Others	#N/A	#N/A	#N/A	#N/A	#N/A	#N/A	#N/A	#N/A
AT4G29540	Chr4:14497729-14499933[+]	#N/A	bacterial transferase hexapeptide repeat-containing protein	Chr4:14499944-14500323[+]	380	0.0971972	0.24472	0.122711	0.754686	1.04989	No	Others	#N/A	#N/A	#N/A	#N/A	#N/A	#N/A	#N/A	#N/A
AT2G13290	Chr2:5511562-5513265[+]	#N/A	beta-1,4-N-acetylglucosaminyltransferase family protein	Chr2:5513276-5513715[+]	440	0.0981659	0.256813	0.130131	1.06215	1.02547	No	Others	#N/A	#N/A	#N/A	#N/A	#N/A	#N/A	#N/A	#N/A
AT5G19970	Chr5:6747550-6748641[+]	#N/A	unknown protein; Has 1807 Blast hits to 1807 proteins in 277 species: Archae - 0; Bacteria - 0; Metazoa - 736; Fungi - 347; Plants - 385; Viruses - 0; Other Eukaryotes - 339 (source: NCBI BLink).	Chr5:6748742-6749091[+]	350	0.030151	0.182666	0.0532916	0.121389	0.314966	No	Others	#N/A	#N/A	#N/A	#N/A	#N/A	#N/A	#N/A	#N/A
AT2G18550	Chr2:8049663-8051213[-]	HB-2, ATHB21, HB21	homeobox protein 21	Chr2:8049423-8049652[-]	230	0.114705	1.16242	2.4937	0.092361	1.18683	No	Others	#N/A	#N/A	#N/A	#N/A	#N/A	#N/A	#N/A	#N/A
AT5G38880	Chr5:15563306-15569194[-]	#N/A	unknown protein; Has 474 Blast hits to 433 proteins in 138 species: Archae - 6; Bacteria - 80; Metazoa - 195; Fungi - 44; Plants - 59; Viruses - 0; Other Eukaryotes - 90 (source: NCBI BLink).	Chr5:15562916-15563255[-]	340	0.0931133	0.0854719	0.246866	0.702894	0.957249	No	Others	#N/A	#N/A	#N/A	#N/A	#N/A	#N/A	#N/A	#N/A
AT5G02250	Chr5:454783-459527[+]	EMB2730, RNR1, ATMTRNASEII	Ribonuclease II/R family protein	Chr5:459528-459747[+]	220	0.119919	0.237767	0.0635866	0.144839	1.19305	No	Others	#N/A	#N/A	#N/A	#N/A	#N/A	#N/A	#N/A	#N/A
AT5G65683	Chr5:26261320-26263783[+]	#N/A	Zinc finger (C3HC4-type RING finger) family protein	Chr5:26263914-26264153[+]	240	0.0879403	0.314822	0.116575	0.464691	0.874905	No	Others	#N/A	#N/A	#N/A	#N/A	#N/A	#N/A	#N/A	#N/A
AT1G09070	Chr1:2927703-2928968[+]	SRC2, (AT)SRC2	soybean gene regulated by cold-2	Chr1:2928999-2929198[+]	200	0.0527642	0.0290605	0.0233151	0.371753	0.524943	No	Others	#N/A	#N/A	#N/A	#N/A	#N/A	#N/A	#N/A	#N/A
AT1G25260	Chr1:8853959-8855872[-]	#N/A	Ribosomal protein L10 family protein	Chr1:8853499-8853878[-]	380	0.171127	0.424126	0.13863	1.32051	1.67414	No	Others	#N/A	#N/A	#N/A	#N/A	#N/A	#N/A	#N/A	#N/A
AT5G40180	Chr5:16067923-16068206[+]	#N/A	BEST Arabidopsis thaliana protein match is: TRICHOME BIREFRINGENCE-LIKE 22 (TAIR:AT3G28150.1); Has 117 Blast hits to 117 proteins in 14 species: Archae - 0; Bacteria - 0; Metazoa - 0; Fungi - 0; Plants - 117; Viruses - 0; Other Eukaryotes - 0 (source: NCBI BLink).	Chr5:16068217-16069176[+]	960	0.104429	0.0726511	0.276867	0.304262	1.01161	No	Others	#N/A	#N/A	#N/A	#N/A	#N/A	#N/A	#N/A	#N/A
AT3G60640	Chr3:22415835-22417158[+]	ATG8G	Ubiquitin-like superfamily protein	Chr3:22417189-22417688[+]	500	0.168845	0.27898	0.186521	1.22147	1.62732	No	Others	#N/A	#N/A	#N/A	#N/A	#N/A	#N/A	#N/A	#N/A
AT3G62630	Chr3:23163747-23165195[-]	#N/A	Protein of unknown function (DUF1645)	Chr3:23163387-23163606[-]	220	0.0959349	0.422698	0.254346	0.313817	0.90672	No	Others	#N/A	#N/A	#N/A	#N/A	#N/A	#N/A	#N/A	#N/A
AT3G54920	Chr3:20345082-20348582[+]	PMR6	Pectin lyase-like superfamily protein	Chr3:20348623-20349202[+]	580	0.0818754	0.130271	0.0803969	0.302164	0.769313	No	Others	#N/A	#N/A	#N/A	#N/A	#N/A	#N/A	#N/A	#N/A
AT4G12320	Chr4:7314778-7316669[-]	CYP706A6	cytochrome P450, family 706, subfamily A, polypeptide 6	Chr4:7314548-7314747[-]	200	0.0791463	0.174363	0.186521	1.0887	0.73492	No	Others	#N/A	#N/A	#N/A	#N/A	#N/A	#N/A	#N/A	#N/A
AT3G16565	Chr3:5639839-5642737[-]	#N/A	alanine-tRNA ligases;nucleic acid binding;ligases, forming aminoacyl-tRNA and related compounds;nucleotide binding;ATP binding	Chr3:5639599-5639808[-]	210	0.100503	0.110707	0.133229	0.632233	0.899902	No	Others	#N/A	#N/A	#N/A	#N/A	#N/A	#N/A	#N/A	#N/A
AT1G65070	Chr1:24172899-24176310[-]	#N/A	DNA mismatch repair protein MutS, type 2	Chr1:24172669-24172898[-]	230	0.114705	0.17689	0.10137	0.531076	1.00424	No	Others	#N/A	#N/A	#N/A	#N/A	#N/A	#N/A	#N/A	#N/A
AT3G60260	Chr3:22273843-22277148[+]	#N/A	ELMO/CED-12 family protein	Chr3:22277179-22277388[+]	210	0.175881	0.221413	0.0888194	0.910415	1.52483	No	Others	#N/A	#N/A	#N/A	#N/A	#N/A	#N/A	#N/A	#N/A
AT4G19829	Chr4:10772133-10772270[-]	#N/A	unknown protein; Has 30201 Blast hits to 17322 proteins in 780 species: Archae - 12; Bacteria - 1396; Metazoa - 17338; Fungi - 3422; Plants - 5037; Viruses - 0; Other Eukaryotes - 2996 (source: NCBI BLink).	Chr4:10771683-10772112[-]	430	0.17179	0.189231	0.184352	0.753386	1.48937	No	Others	#N/A	#N/A	#N/A	#N/A	#N/A	#N/A	#N/A	#N/A
AT3G55220	Chr3:20466921-20470944[-]	#N/A	Cleavage and polyadenylation specificity factor (CPSF) A subunit protein	Chr3:20466561-20466910[-]	350	0.120604	0.0830299	0.119906	0.59177	1.03489	No	Others	#N/A	#N/A	#N/A	#N/A	#N/A	#N/A	#N/A	#N/A
AT4G01710	Chr4:735753-736604[+]	CRK, ARPC5	ARP2/3 complex 16 kDa subunit (p16-Arc)	Chr4:736635-737004[+]	370	0.114085	0.109958	0.189041	0.416248	0.978948	No	Others	#N/A	#N/A	#N/A	#N/A	#N/A	#N/A	#N/A	#N/A
AT1G03160	Chr1:761282-766158[+]	FZL	FZO-like	Chr1:766229-766528[+]	300	0.193469	0.42622	0.497389	1.48701	1.64482	No	Others	#N/A	#N/A	#N/A	#N/A	#N/A	#N/A	#N/A	#N/A
AT1G52905	Chr1:19706085-19706706[+]	#N/A	unknown protein; BEST Arabidopsis thaliana protein match is: unknown protein (TAIR:AT1G27565.1); Has 35333 Blast hits to 34131 proteins in 2444 species: Archae - 798; Bacteria - 22429; Metazoa - 974; Fungi - 991; Plants - 531; Viruses - 0; Other Eukaryotes - 9610 (source: NCBI BLink).	Chr1:19706727-19706936[+]	210	0.100503	0.24909	0.133229	0.455208	0.849908	No	Others	#N/A	#N/A	#N/A	#N/A	#N/A	#N/A	#N/A	#N/A
AT1G20340	Chr1:7042429-7043363[-]	DRT112, PETE2	Cupredoxin superfamily protein	Chr1:7042129-7042328[-]	200	0.0527642	0.0581209	0.0699453	0.21243	0.446201	No	Others	#N/A	#N/A	#N/A	#N/A	#N/A	#N/A	#N/A	#N/A
AT5G49840	Chr5:20255191-20259300[+]	#N/A	ATP-dependent Clp protease	Chr5:20259311-20259790[+]	480	0.124151	0.188038	0.137148	1.28083	1.03445	No	Others	#N/A	#N/A	#N/A	#N/A	#N/A	#N/A	#N/A	#N/A
AT1G29230	Chr1:10214860-10216422[+]	CIPK18, SnRK3.20, ATWL1, WL1, ATCIPK18	CBL-interacting protein kinase 18	Chr1:10216433-10216802[+]	370	0.171127	0.251334	0.201644	0.186594	1.41876	No	Others	#N/A	#N/A	#N/A	#N/A	#N/A	#N/A	#N/A	#N/A
AT2G39870	Chr2:16643381-16645377[+]	#N/A	unknown protein; BEST Arabidopsis thaliana protein match is: unknown protein (TAIR:AT3G55690.1); Has 73 Blast hits to 71 proteins in 14 species: Archae - 0; Bacteria - 0; Metazoa - 2; Fungi - 2; Plants - 69; Viruses - 0; Other Eukaryotes - 0 (source: NCBI BLink).	Chr2:16645378-16645817[+]	440	0.19187	0.18493	0.254346	1.49667	1.58676	No	Others	#N/A	#N/A	#N/A	#N/A	#N/A	#N/A	#N/A	#N/A
AT3G49910	Chr3:18504256-18504967[+]	#N/A	Translation protein SH3-like family protein	Chr3:18505088-18505517[+]	430	0.147249	0.202747	0.140975	0.41992	1.20859	No	Others	#N/A	#N/A	#N/A	#N/A	#N/A	#N/A	#N/A	#N/A
AT2G22100	Chr2:9392210-9393562[-]	#N/A	RNA-binding (RRM/RBD/RNP motifs) family protein	Chr2:9391750-9392049[-]	300	0.105528	0.406846	0.326411	0.743506	0.839909	No	Others	#N/A	#N/A	#N/A	#N/A	#N/A	#N/A	#N/A	#N/A
AT5G60680	Chr5:24386145-24386976[+]	#N/A	Protein of unknown function, DUF584	Chr5:24387027-24388166[+]	1140	0.124968	0.0509833	0.0899881	0.181684	0.990024	No	Others	#N/A	#N/A	#N/A	#N/A	#N/A	#N/A	#N/A	#N/A
AT5G10960	Chr5:3464218-3465687[+]	#N/A	Polynucleotidyl transferase, ribonuclease H-like superfamily protein	Chr5:3465818-3466357[+]	540	0.068398	0.150684	0.146799	0.383555	0.534664	No	Others	#N/A	#N/A	#N/A	#N/A	#N/A	#N/A	#N/A	#N/A
AT3G54160	Chr3:20053468-20055027[+]	#N/A	RNI-like superfamily protein	Chr3:20055028-20055337[+]	310	0.193469	0.464967	0.450758	1.30999	1.50484	No	Others	#N/A	#N/A	#N/A	#N/A	#N/A	#N/A	#N/A	#N/A
AT4G13840	Chr4:8013893-8016486[-]	#N/A	HXXXD-type acyl-transferase family protein	Chr4:8013683-8013882[-]	200	0.13191	0.435907	0.0466302	0.690398	1.02364	No	Others	#N/A	#N/A	#N/A	#N/A	#N/A	#N/A	#N/A	#N/A
AT3G53700	Chr3:19900280-19902884[+]	MEE40	Pentatricopeptide repeat (PPR) superfamily protein	Chr3:19902955-19903264[+]	310	0.136166	0.112492	0.07521	0.325498	1.04989	No	Others	#N/A	#N/A	#N/A	#N/A	#N/A	#N/A	#N/A	#N/A
AT2G18000	Chr2:7829035-7830580[+]	TAF14	TBP-associated factor 14	Chr2:7830821-7831230[+]	410	0.0514772	0.113407	0.0227464	0.0647653	0.396908	No	Others	#N/A	#N/A	#N/A	#N/A	#N/A	#N/A	#N/A	#N/A
AT5G13190	Chr5:4204817-4206405[-]	#N/A	CONTAINS InterPro DOMAIN/s: LPS-induced tumor necrosis factor alpha factor (InterPro:IPR006629); Has 30201 Blast hits to 17322 proteins in 780 species: Archae - 12; Bacteria - 1396; Metazoa - 17338; Fungi - 3422; Plants - 5037; Viruses - 0; Other Eukaryotes - 2996 (source: NCBI BLink).	Chr5:4204137-4204756[-]	620	0.357435	0.224984	0.30084	2.31275	2.74325	No	Others	#N/A	#N/A	#N/A	#N/A	#N/A	#N/A	#N/A	#N/A
AT1G80630	Chr1:30308696-30310656[-]	#N/A	RNI-like superfamily protein	Chr1:30308166-30308685[-]	520	0.13191	0.111771	0.0358694	0.245112	1.00951	No	Others	#N/A	#N/A	#N/A	#N/A	#N/A	#N/A	#N/A	#N/A
AT3G23210	Chr3:8283090-8285081[-]	bHLH34	basic helix-loop-helix (bHLH) DNA-binding superfamily protein	Chr3:8282810-8283059[-]	250	0.105528	0.0929935	0.0746083	0.42486	0.797913	No	Others	#N/A	#N/A	#N/A	#N/A	#N/A	#N/A	#N/A	#N/A
AT3G19830	Chr3:6885606-6890064[-]	NTMC2TYPE5.2, NTMC2T5.2	Calcium-dependent lipid-binding (CaLB domain) family protein	Chr3:6884396-6885565[-]	1170	0.130783	0.153996	0.175361	0.767109	0.978099	No	Others	#N/A	#N/A	#N/A	#N/A	#N/A	#N/A	#N/A	#N/A
AT5G12130	Chr5:3919594-3922485[+]	PDE149, ATTERC	integral membrane TerC family protein	Chr5:3922506-3922865[+]	360	0.146567	0.145302	0.0647641	0.678597	1.04989	No	Others	#N/A	#N/A	#N/A	#N/A	#N/A	#N/A	#N/A	#N/A
AT2G32280	Chr2:13713036-13714211[+]	#N/A	Protein of unknown function (DUF1218)	Chr2:13714242-13714441[+]	200	0.13191	0.174363	0.0699453	0.531076	0.944897	No	Others	#N/A	#N/A	#N/A	#N/A	#N/A	#N/A	#N/A	#N/A
AT1G30910	Chr1:11000883-11002936[+]	#N/A	Molybdenum cofactor sulfurase family protein	Chr1:11002987-11003296[+]	310	0.153186	0.0749947	0.120336	0.770916	1.08375	No	Others	#N/A	#N/A	#N/A	#N/A	#N/A	#N/A	#N/A	#N/A
AT4G40020	Chr4:18553453-18555300[-]	#N/A	Myosin heavy chain-related protein	Chr4:18553163-18553412[-]	250	0.189951	0.302229	0.410346	1.61447	1.32286	No	Others	#N/A	#N/A	#N/A	#N/A	#N/A	#N/A	#N/A	#N/A
AT5G25910	Chr5:9038860-9041377[+]	AtRLP52, RLP52	receptor like protein 52	Chr5:9041408-9041677[+]	270	0.175881	0.215263	0.552654	1.19984	1.22487	No	Others	#N/A	#N/A	#N/A	#N/A	#N/A	#N/A	#N/A	#N/A
AT3G10980	Chr3:3438278-3440809[+]	#N/A	PLAC8 family protein	Chr3:3440810-3441279[+]	470	0.190849	0.32152	0.267876	0.960456	1.31794	No	Others	#N/A	#N/A	#N/A	#N/A	#N/A	#N/A	#N/A	#N/A
AT2G15050	Chr2:6518840-6520160[+]	LTP, LTP7	lipid transfer protein	Chr2:6521071-6521460[+]	390	0.0676464	0.134125	0	0.394902	0.457643	No	Others	#N/A	#N/A	#N/A	#N/A	#N/A	#N/A	#N/A	#N/A
AT2G26350	Chr2:11217439-11220507[-]	PEX10, ATPEX10	peroxin 10	Chr2:11217149-11217408[-]	260	0.142057	0.402376	0.412498	0.490224	0.948935	No	Others	#N/A	#N/A	#N/A	#N/A	#N/A	#N/A	#N/A	#N/A
AT4G07990	Chr4:4825409-4829608[-]	#N/A	Chaperone DnaJ-domain superfamily protein	Chr4:4824619-4825398[-]	780	0.18941	0.454535	0.30489	0.878317	1.21141	No	Others	#N/A	#N/A	#N/A	#N/A	#N/A	#N/A	#N/A	#N/A
AT1G28280	Chr1:9886077-9887478[-]	#N/A	VQ motif-containing protein	Chr1:9885487-9885926[-]	440	0.159891	0.158512	0.240216	0.885126	1.01807	No	Others	#N/A	#N/A	#N/A	#N/A	#N/A	#N/A	#N/A	#N/A
AT2G14750	Chr2:6314032-6315766[+]	APK, AKN1, ATAKN1, APK1	APS kinase	Chr2:6315837-6316196[+]	360	0.175881	0.145302	0.194292	1.15066	1.10821	No	Others	#N/A	#N/A	#N/A	#N/A	#N/A	#N/A	#N/A	#N/A
AT5G03230	Chr5:769514-770385[+]	#N/A	Protein of unknown function, DUF584	Chr5:770456-770655[+]	200	0.158293	0.290605	0.163206	0.238984	0.997392	No	Others	#N/A	#N/A	#N/A	#N/A	#N/A	#N/A	#N/A	#N/A
AT1G71060	Chr1:26805651-26807183[-]	#N/A	Tetratricopeptide repeat (TPR)-like superfamily protein	Chr1:26805391-26805600[-]	210	0.150755	0.33212	0.355278	0.657522	0.949897	No	Others	#N/A	#N/A	#N/A	#N/A	#N/A	#N/A	#N/A	#N/A
AT1G66380	Chr1:24757413-24758490[+]	MYB114, AtMYB114	myb domain protein 114	Chr1:24758491-24758750[+]	260	0.162351	0.536501	0.215216	0.388094	1.00951	No	Others	#N/A	#N/A	#N/A	#N/A	#N/A	#N/A	#N/A	#N/A
AT5G57390	Chr5:23253459-23256450[-]	AIL5, CHO1, EMK	AINTEGUMENTA-like 5	Chr5:23253079-23253338[-]	260	0.0811757	0.357667	0.735322	0.674057	0.484563	No	Others	#N/A	#N/A	#N/A	#N/A	#N/A	#N/A	#N/A	#N/A
AT3G45210	Chr3:16557273-16557970[-]	#N/A	Protein of unknown function, DUF584	Chr3:16556653-16557162[-]	510	0.0844227	0.13949	0.167869	0.541697	0.493446	No	Others	#N/A	#N/A	#N/A	#N/A	#N/A	#N/A	#N/A	#N/A
AT3G48250	Chr3:17870064-17871929[-]	#N/A	Pentatricopeptide repeat (PPR) superfamily protein	Chr3:17869354-17869783[-]	430	0.0613537	0.202747	0.0650654	0.271713	0.354031	No	Others	#N/A	#N/A	#N/A	#N/A	#N/A	#N/A	#N/A	#N/A
AT3G18010	Chr3:6161137-6163272[-]	WOX1	WUSCHEL related homeobox 1	Chr3:6160557-6161066[-]	510	0.165535	0.307699	0.100575	0.697688	0.92637	No	Others	#N/A	#N/A	#N/A	#N/A	#N/A	#N/A	#N/A	#N/A
AT5G35110	Chr5:13363937-13364275[-]	#N/A	unknown protein; BEST Arabidopsis thaliana protein match is: unknown protein (TAIR:AT2G46490.1); Has 1807 Blast hits to 1807 proteins in 277 species: Archae - 0; Bacteria - 0; Metazoa - 736; Fungi - 347; Plants - 385; Viruses - 0; Other Eukaryotes - 339 (source: NCBI BLink).	Chr5:13363647-13363926[-]	280	0.169599	0.477422	2.31486	0.701778	0.937398	No	Others	#N/A	#N/A	#N/A	#N/A	#N/A	#N/A	#N/A	#N/A
AT1G57540	Chr1:21310329-21311502[-]	#N/A	unknown protein; Has 29 Blast hits to 29 proteins in 11 species: Archae - 0; Bacteria - 0; Metazoa - 0; Fungi - 0; Plants - 29; Viruses - 0; Other Eukaryotes - 0 (source: NCBI BLink).	Chr1:21310049-21310328[-]	280	0.188443	0.33212	0.432995	0.455208	1.03114	No	Others	#N/A	#N/A	#N/A	#N/A	#N/A	#N/A	#N/A	#N/A
AT2G26150	Chr2:11135682-11137396[+]	ATHSFA2, HSFA2	heat shock transcription factor A2	Chr2:11137397-11137626[+]	230	0.183528	0.10108	0.223014	0.0692707	1.00424	No	Others	#N/A	#N/A	#N/A	#N/A	#N/A	#N/A	#N/A	#N/A
AT5G38430	Chr5:15384117-15385247[-]	#N/A	Ribulose bisphosphate carboxylase (small chain) family protein	Chr5:15383187-15384106[-]	920	0.619672	0.175714	0.0325327	2.89004	3.38161	No	Others	#N/A	#N/A	#N/A	#N/A	#N/A	#N/A	#N/A	#N/A
AT3G08610	Chr3:2615426-2616803[-]	#N/A	unknown protein; Has 40 Blast hits to 40 proteins in 15 species: Archae - 0; Bacteria - 0; Metazoa - 0; Fungi - 0; Plants - 40; Viruses - 0; Other Eukaryotes - 0 (source: NCBI BLink).	Chr3:2615036-2615375[-]	340	0.496604	0.803436	0.329154	0.890333	2.65559	No	Others	#N/A	#N/A	#N/A	#N/A	#N/A	#N/A	#N/A	#N/A
AT1G30290	Chr1:10670320-10672740[-]	#N/A	Tetratricopeptide repeat (TPR)-like superfamily protein	Chr1:10669680-10670179[-]	500	0.168845	0.36035	0.354389	0.690398	0.797913	No	Others	#N/A	#N/A	#N/A	#N/A	#N/A	#N/A	#N/A	#N/A
AT3G49350	Chr3:18297406-18300189[-]	#N/A	Ypt/Rab-GAP domain of gyp1p superfamily protein	Chr3:18296946-18297205[-]	260	0.121763	0.0447084	0.0717387	0.347242	0.565323	No	Others	#N/A	#N/A	#N/A	#N/A	#N/A	#N/A	#N/A	#N/A
AT3G52480	Chr3:19452254-19453162[-]	#N/A	unknown protein; FUNCTIONS IN: molecular_function unknown; INVOLVED IN: biological_process unknown; LOCATED IN: endomembrane system; EXPRESSED IN: 10 plant structures; EXPRESSED DURING: LP.04 four leaves visible, 4 anthesis, petal differentiation and expansion stage; Has 28 Blast hits to 28 proteins in 7 species: Archae - 0; Bacteria - 0; Metazoa - 0; Fungi - 0; Plants - 28; Viruses - 0; Other Eu…	Chr3:19451954-19452203[-]	250	0.253268	0.0464967	0.0932604	0.339888	1.15487	No	Others	#N/A	#N/A	#N/A	#N/A	#N/A	#N/A	#N/A	#N/A
AT4G03292	Chr4:1444672-1445220[-]	#N/A	Polynucleotidyl transferase, ribonuclease H-like superfamily protein	Chr4:1444332-1444631[-]	300	0.169599	0.373634	0.233151	1.70703	0.768666	No	Others	#N/A	#N/A	#N/A	#N/A	#N/A	#N/A	#N/A	#N/A
AT1G60600	Chr1:22324645-22327359[-]	ABC4	UbiA prenyltransferase family protein	Chr1:22324355-22324584[-]	230	0.206469	0.20216	0.020274	0.484895	0.912944	No	Others	#N/A	#N/A	#N/A	#N/A	#N/A	#N/A	#N/A	#N/A
AT5G13740	Chr5:4432306-4436668[+]	ZIF1	zinc induced facilitator 1	Chr5:4436789-4437128[+]	340	0.248302	0.307699	0.123433	0.218678	1.08076	No	Others	#N/A	#N/A	#N/A	#N/A	#N/A	#N/A	#N/A	#N/A
AT5G34850	Chr5:13108154-13111631[-]	ATPAP26, PAP26	purple acid phosphatase 26	Chr5:13107504-13108143[-]	640	0.403976	1.09885	1.17304	0.89619	1.75528	No	Others	#N/A	#N/A	#N/A	#N/A	#N/A	#N/A	#N/A	#N/A
AT1G69980	Chr1:26356356-26357667[-]	#N/A	unknown protein; LOCATED IN: endomembrane system; EXPRESSED IN: 24 plant structures; EXPRESSED DURING: 15 growth stages; Has 30 Blast hits to 30 proteins in 12 species: Archae - 0; Bacteria - 0; Metazoa - 0; Fungi - 0; Plants - 30; Viruses - 0; Other Eukaryotes - 0 (source: NCBI BLink).	Chr1:26356016-26356285[-]	270	0.42993	0.602735	0.639006	1.14083	1.76925	No	Others	#N/A	#N/A	#N/A	#N/A	#N/A	#N/A	#N/A	#N/A
AT4G24770	Chr4:12766030-12768040[-]	RBP31, ATRBP31, CP31, ATRBP33	31-kDa RNA binding protein	Chr4:12765620-12765939[-]	320	0.214354	0.163465	0.0728597	0.331922	0.836628	No	Others	#N/A	#N/A	#N/A	#N/A	#N/A	#N/A	#N/A	#N/A
AT5G59250	Chr5:23903892-23906977[+]	#N/A	Major facilitator superfamily protein	Chr5:23907018-23907777[+]	760	0.255311	0.899937	0.436218	1.31912	0.982151	No	Others	#N/A	#N/A	#N/A	#N/A	#N/A	#N/A	#N/A	#N/A
AT4G00740	Chr4:307431-310482[-]	#N/A	S-adenosyl-L-methionine-dependent methyltransferases superfamily protein	Chr4:306761-307380[-]	620	0.391476	0.77807	0.646806	0.950797	1.49863	No	Others	#N/A	#N/A	#N/A	#N/A	#N/A	#N/A	#N/A	#N/A
AT2G06925	Chr2:2842353-2843301[-]	ATSPLA2-ALPHA, PLA2-ALPHA	Phospholipase A2 family protein	Chr2:2842043-2842322[-]	280	0.285806	0.968682	1.02975	1.28343	1.09363	No	Others	#N/A	#N/A	#N/A	#N/A	#N/A	#N/A	#N/A	#N/A
AT5G42090	Chr5:16826698-16828454[+]	#N/A	Lung seven transmembrane receptor family protein	Chr5:16828485-16828834[+]	350	0.648246	0.631027	0.759406	2.39743	2.47473	No	Others	#N/A	#N/A	#N/A	#N/A	#N/A	#N/A	#N/A	#N/A
AT5G23150	Chr5:7785835-7792489[+]	HUA2	Tudor/PWWP/MBT domain-containing protein	Chr5:7792510-7792859[+]	350	0.286434	0.730663	0.586208	1.06215	1.06488	No	Others	#N/A	#N/A	#N/A	#N/A	#N/A	#N/A	#N/A	#N/A
AT2G39500	Chr2:16489073-16489588[+]	#N/A	unknown protein; FUNCTIONS IN: molecular_function unknown; INVOLVED IN: biological_process unknown; LOCATED IN: endomembrane system; EXPRESSED IN: 21 plant structures; EXPRESSED DURING: 12 growth stages; Has 16 Blast hits to 16 proteins in 8 species: Archae - 0; Bacteria - 0; Metazoa - 0; Fungi - 0; Plants - 16; Viruses - 0; Other Eukaryotes - 0 (source: NCBI BLink).	Chr2:16489859-16490138[+]	280	0.358043	0.352877	0.316419	0.853514	1.29361	No	Others	#N/A	#N/A	#N/A	#N/A	#N/A	#N/A	#N/A	#N/A
AT5G06700	Chr5:2063487-2066039[+]	TBR	Plant protein of unknown function (DUF828)	Chr5:2066050-2066549[+]	500	0.284927	0.441719	0.214499	0.77537	1.00789	No	Others	#N/A	#N/A	#N/A	#N/A	#N/A	#N/A	#N/A	#N/A
AT1G27540	Chr1:9566332-9567906[-]	#N/A	Protein of unknown function (DUF295)	Chr1:9565932-9566271[-]	340	0.496604	1.12823	1.12461	1.40579	1.62115	No	Others	#N/A	#N/A	#N/A	#N/A	#N/A	#N/A	#N/A	#N/A
AT2G28426	Chr2:12159276-12159407[-]	#N/A	unknown protein; Has 30201 Blast hits to 17322 proteins in 780 species: Archae - 12; Bacteria - 1396; Metazoa - 17338; Fungi - 3422; Plants - 5037; Viruses - 0; Other Eukaryotes - 2996 (source: NCBI BLink).	Chr2:12158896-12159095[-]	200	0.316585	0.406846	0.536247	0.77006	1.02364	No	Others	#N/A	#N/A	#N/A	#N/A	#N/A	#N/A	#N/A	#N/A
AT2G25760	Chr2:10984808-10988924[-]	#N/A	Protein kinase family protein	Chr2:10984208-10984767[-]	560	0.744352	1.38037	1.41556	2.20017	2.21226	No	Others	#N/A	#N/A	#N/A	#N/A	#N/A	#N/A	#N/A	#N/A
AT2G30120	Chr2:12860541-12861910[-]	#N/A	unknown protein; EXPRESSED IN: 22 plant structures; EXPRESSED DURING: 12 growth stages; BEST Arabidopsis thaliana protein match is: unknown protein (TAIR:AT3G14750.1); Has 2527 Blast hits to 2101 proteins in 358 species: Archae - 77; Bacteria - 245; Metazoa - 1087; Fungi - 215; Plants - 350; Viruses - 4; Other Eukaryotes - 549 (source: NCBI BLink).	Chr2:12860191-12860530[-]	340	0.651793	1.28208	1.42634	1.29645	1.8373	No	Others	#N/A	#N/A	#N/A	#N/A	#N/A	#N/A	#N/A	#N/A
AT1G53330	Chr1:19896027-19897442[+]	#N/A	Pentatricopeptide repeat (PPR) superfamily protein	Chr1:19897683-19898302[+]	620	0.29622	0.326293	0.392675	1.04352	0.819648	No	Others	#N/A	#N/A	#N/A	#N/A	#N/A	#N/A	#N/A	#N/A
AT4G03430	Chr4:1517134-1520563[-]	STA1, EMB2770	pre-mRNA splicing factor-related	Chr4:1515914-1516663[-]	750	0.365945	1.17179	0.7521	1.499	1.00755	No	Others	#N/A	#N/A	#N/A	#N/A	#N/A	#N/A	#N/A	#N/A
AT1G13410	Chr1:4601261-4603298[+]	#N/A	Tetratricopeptide repeat (TPR)-like superfamily protein	Chr1:4603329-4603638[+]	310	0.439701	0.508558	0.718882	1.46046	1.20299	No	Others	#N/A	#N/A	#N/A	#N/A	#N/A	#N/A	#N/A	#N/A
AT1G06140	Chr1:1864796-1866472[+]	#N/A	Pentatricopeptide repeat (PPR) superfamily protein	Chr1:1866503-1867002[+]	500	0.467682	0.964279	0.879615	1.27941	1.26464	No	Others	#N/A	#N/A	#N/A	#N/A	#N/A	#N/A	#N/A	#N/A
AT5G19900	Chr5:6728160-6730045[-]	#N/A	PRLI-interacting factor, putative	Chr5:6727750-6728149[-]	400	0.606788	1.2496	0.839343	2.01809	1.56171	No	Others	#N/A	#N/A	#N/A	#N/A	#N/A	#N/A	#N/A	#N/A
AT1G55915	Chr1:20907547-20909638[+]	#N/A	zinc ion binding	Chr1:20909909-20910858[+]	950	0.760915	0.685215	0.530112	1.11805	1.91742	No	Others	#N/A	#N/A	#N/A	#N/A	#N/A	#N/A	#N/A	#N/A
AT3G59390	Chr3:21946118-21948372[+]	#N/A	unknown protein; FUNCTIONS IN: molecular_function unknown; INVOLVED IN: biological_process unknown; LOCATED IN: endomembrane system; EXPRESSED IN: 22 plant structures; EXPRESSED DURING: 13 growth stages; CONTAINS InterPro DOMAIN/s: Protein of unknown function DUF2054 (InterPro:IPR019352); Has 35333 Blast hits to 34131 proteins in 2444 species: Archae - 798; Bacteria - 22429; Metazoa - 974; Fungi …	Chr3:21948513-21948752[+]	240	0.659552	1.16242	0.854887	1.28343	1.57483	No	Others	#N/A	#N/A	#N/A	#N/A	#N/A	#N/A	#N/A	#N/A
AT1G15760	Chr1:5425714-5426322[+]	#N/A	Sterile alpha motif (SAM) domain-containing protein	Chr1:5426383-5426782[+]	400	0.514451	0.377786	0.209836	1.2082	1.12863	No	Others	#N/A	#N/A	#N/A	#N/A	#N/A	#N/A	#N/A	#N/A
AT2G35345	Chr2:14880274-14880636[-]	#N/A	unknown protein; Has 2 Blast hits to 2 proteins in 1 species: Archae - 0; Bacteria - 0; Metazoa - 0; Fungi - 0; Plants - 2; Viruses - 0; Other Eukaryotes - 0 (source: NCBI BLink).	Chr2:14879744-14880223[-]	480	0.923373	0.883922	0.573163	0.575332	1.93573	No	Others	#N/A	#N/A	#N/A	#N/A	#N/A	#N/A	#N/A	#N/A
AT2G42540	Chr2:17711032-17712330[-]	COR15A, COR15	cold-regulated 15a	Chr2:17710432-17711031[-]	600	0	0.00968682	0.124347	1.20377	10.9188	No	Sense	#N/A	#N/A	#N/A	#N/A	#N/A	AT2G42530	1086	486
AT5G06530	Chr5:1989747-1994912[-]	#N/A	ABC-2 type transporter family protein	Chr5:1989373-1989746[-]	374	0	0.217565	0.0748078	0.283998	4.98275	No	Sense	#N/A	#N/A	#N/A	#N/A	#N/A	AT5G06520	374	0
AT5G51990	Chr5:21117113-21117787[-]	CBF4, DREB1D	C-repeat-binding factor 4	Chr5:21116883-21117112[-]	230	0	2.19849	2.35178	0.96979	4.24519	No	Sense	#N/A	#N/A	#N/A	#N/A	#N/A	AT5G51980	915	685
AT1G62570	Chr1:23169136-23172105[+]	FMO GS-OX4	flavin-monooxygenase glucosinolate S-oxygenase 4	Chr1:23172106-23172495[+]	390	0	0.208639	0.358694	0.422137	4.09186	No	Sense	#N/A	#N/A	#N/A	#N/A	#N/A	AT1G62580	1227	837
AT4G18810	Chr4:10322156-10325816[-]	#N/A	NAD(P)-binding Rossmann-fold superfamily protein	Chr4:10321956-10322155[-]	200	0	0.552149	0.233151	1.54012	3.20215	No	Sense	#N/A	#N/A	#N/A	#N/A	#N/A	AT4G18800	604	404
AT3G26290	Chr3:9632682-9634470[-]	CYP71B26	cytochrome P450, family 71, subfamily B, polypeptide 26	Chr3:9632372-9632601[-]	230	0	0.12635	0.446028	0.415624	2.8986	No	Sense	#N/A	#N/A	#N/A	#N/A	#N/A	AT3G26280	672	362
AT4G16146	Chr4:9142404-9144583[-]	#N/A	cAMP-regulated phosphoprotein 19-related protein	Chr4:9141573-9142403[-]	831	0	0.510569	0.202008	0.313149	2.28044	No	Sense	#N/A	#N/A	#N/A	#N/A	#N/A	AT4G16144	831	0
AT1G75950	Chr1:28516548-28517699[+]	SKP1, ASK1, ATSKP1, SKP1A, UIP1	S phase kinase-associated protein 1	Chr1:28517730-28518032[+]	303	0	0.134273	0.0153895	0.981526	2.06166	No	Sense	#N/A	#N/A	#N/A	#N/A	#N/A	AT1G75960	333	0
AT1G77680	Chr1:29191834-29196287[-]	#N/A	Ribonuclease II/R family protein	Chr1:29191484-29191833[-]	350	0	0	0.0133229	0.242777	1.97978	No	Sense	#N/A	#N/A	#N/A	#N/A	#N/A	AT1G77670	858	508
AT3G63060	Chr3:23300290-23301473[-]	EDL3	EID1-like 3	Chr3:23299112-23300289[-]	1178	0	0.0296032	0.126669	0.139757	1.95628	No	Sense	#N/A	#N/A	#N/A	#N/A	#N/A	AT3G63052	1178	0
AT2G20880	Chr2:8985973-8987263[+]	#N/A	Integrase-type DNA-binding superfamily protein	Chr2:8987264-8987665[+]	402	0	0.0433738	0.0231991	0.118898	1.85428	No	Sense	#N/A	#N/A	#N/A	#N/A	#N/A	AT2G20890	402	0
AT5G12010	Chr5:3877812-3879539[-]	#N/A	unknown protein; INVOLVED IN: response to salt stress; LOCATED IN: chloroplast, plasma membrane, membrane; EXPRESSED IN: 23 plant structures; EXPRESSED DURING: 13 growth stages; BEST Arabidopsis thaliana protein match is: unknown protein (TAIR:AT4G29780.1); Has 1807 Blast hits to 1807 proteins in 277 species: Archae - 0; Bacteria - 0; Metazoa - 736; Fungi - 347; Plants - 385; Viruses - 0; Other E…	Chr5:3877432-3877811[-]	380	0	0.015295	0.0368133	0.237586	1.72679	No	Sense	#N/A	#N/A	#N/A	#N/A	#N/A	AT5G12000	897	517
AT1G27200	Chr1:9449549-9451750[-]	#N/A	Domain of unknown function (DUF23)	Chr1:9449329-9449548[-]	220	0	0.0792558	0.105978	0.168979	1.52711	No	Sense	#N/A	#N/A	#N/A	#N/A	#N/A	AT1G27190	723	503
AT4G00430	Chr4:185450-187627[-]	TMP-C, PIP1;4, PIP1E	plasma membrane intrinsic protein 1;4	Chr4:185150-185449[-]	300	0	0.0581209	0.0310868	0.230133	1.46984	No	Sense	#N/A	#N/A	#N/A	#N/A	#N/A	AT4G00420	1062	762
AT5G55050	Chr5:22337701-22340100[+]	#N/A	GDSL-like Lipase/Acylhydrolase superfamily protein	Chr5:22340101-22340310[+]	210	0	0.33212	0.266458	0.328761	1.39985	No	Sense	#N/A	#N/A	#N/A	#N/A	#N/A	AT5G55056	882	672
AT1G78380	Chr1:29486413-29487906[-]	ATGSTU19, GST8, GSTU19	glutathione S-transferase TAU 19	Chr1:29485993-29486362[-]	370	0	0.0314167	0.0126028	0.990384	1.3762	No	Sense	#N/A	#N/A	#N/A	#N/A	#N/A	AT1G78370	1122	702
AT5G16110	Chr5:5260604-5262840[-]	#N/A	unknown protein; FUNCTIONS IN: molecular_function unknown; INVOLVED IN: biological_process unknown; LOCATED IN: chloroplast; EXPRESSED IN: 24 plant structures; EXPRESSED DURING: 15 growth stages; BEST Arabidopsis thaliana protein match is: unknown protein (TAIR:AT3G02555.1); Has 133 Blast hits to 133 proteins in 18 species: Archae - 0; Bacteria - 0; Metazoa - 0; Fungi - 0; Plants - 133; Viruses -…	Chr5:5260084-5260603[-]	520	0	0.0223542	0.0358694	0.541289	1.32245	No	Sense	#N/A	#N/A	#N/A	#N/A	#N/A	AT5G16100	884	364
AT5G06760	Chr5:2089492-2090430[-]	LEA4-5	Late Embryogenesis Abundant 4-5	Chr5:2089288-2089491[-]	204	0	0.0569813	0.205721	0.0260331	1.28662	No	Sense	#N/A	#N/A	#N/A	#N/A	#N/A	AT5G06755	204	0
AT2G38530	Chr2:16128378-16129158[+]	LTP2, LP2, cdf3	lipid transfer protein 2	Chr2:16129159-16129368[+]	210	0	0.0553533	0.399687	0.202315	1.27486	No	Sense	#N/A	#N/A	#N/A	#N/A	#N/A	AT2G38540	1191	981
AT1G77260	Chr1:29023772-29026957[-]	#N/A	S-adenosyl-L-methionine-dependent methyltransferases superfamily protein	Chr1:29023475-29023771[-]	297	0	0.117416	0.0314008	0.286101	1.20189	No	Sense	#N/A	#N/A	#N/A	#N/A	#N/A	AT1G77250	297	0
AT5G41460	Chr5:16589598-16592241[-]	#N/A	Protein of unknown function (DUF604)	Chr5:16589378-16589597[-]	220	0	0.237767	0.275542	0.289678	1.12147	No	Sense	#N/A	#N/A	#N/A	#N/A	#N/A	AT5G41450	503	283
AT5G19590	Chr5:6610730-6612103[-]	#N/A	Protein of unknown function, DUF538	Chr5:6610350-6610699[-]	350	0	0.0498179	0	0.257951	1.06488	No	Sense	#N/A	#N/A	#N/A	#N/A	#N/A	AT5G19580	1103	723
AT1G16850	Chr1:5764807-5765651[-]	#N/A	unknown protein; FUNCTIONS IN: molecular_function unknown; INVOLVED IN: response to salt stress; LOCATED IN: endomembrane system; EXPRESSED IN: leaf apex, leaf whorl, male gametophyte, flower, leaf; EXPRESSED DURING: LP.06 six leaves visible, LP.04 four leaves visible, LP.10 ten leaves visible, petal differentiation and expansion stage, LP.08 eight leaves visible; BEST Arabidopsis thaliana protei…	Chr1:5764547-5764806[-]	260	0	0.0447084	0.0538041	0.10213	1.0297	No	Sense	#N/A	#N/A	#N/A	#N/A	#N/A	AT1G16840	733	473
AT3G13100	Chr3:4208735-4214173[-]	ATMRP7, MRP7, ABCC7	multidrug resistance-associated protein 7	Chr3:4208505-4208734[-]	230	0	0.10108	0	0.277083	1.02706	No	Sense	#N/A	#N/A	#N/A	#N/A	#N/A	AT3G13090	563	333
AT1G12880	Chr1:4389751-4391151[+]	atnudt12, NUDT12	nudix hydrolase homolog 12	Chr1:4391152-4391491[+]	340	0	0.0854719	0.0822886	0.484216	1.01901	No	Sense	#N/A	#N/A	#N/A	#N/A	#N/A	AT1G12890	582	242
AT1G76680	Chr1:28776846-28778467[+]	OPR1	12-oxophytodienoate reductase 1	Chr1:28778468-28778777[+]	310	0	0.0374974	0.015042	0.736653	1.01602	No	Sense	#N/A	#N/A	#N/A	#N/A	#N/A	AT1G76690	422	112
AT1G69610	Chr1:26186954-26189489[+]	#N/A	Protein of unknown function (DUF1666)	Chr1:26189490-26189759[+]	270	0	0.0861051	0.0863522	0.157356	1.011	No	Sense	#N/A	#N/A	#N/A	#N/A	#N/A	AT1G69620	346	76
AT5G26340	Chr5:9243511-9247066[-]	MSS1, STP13, ATSTP13	Major facilitator superfamily protein	Chr5:9243251-9243510[-]	260	0	0.134125	0.215216	0.142982	1.00951	No	Sense	#N/A	#N/A	#N/A	#N/A	#N/A	AT5G26330	797	537
AT3G56720	Chr3:21011011-21013490[+]	#N/A	unknown protein; FUNCTIONS IN: molecular_function unknown; INVOLVED IN: biological_process unknown; LOCATED IN: cellular_component unknown; EXPRESSED IN: 24 plant structures; EXPRESSED DURING: 15 growth stages.	Chr3:21013491-21013750[+]	260	0	0.0223542	0.0179347	0.245112	1.00951	No	Sense	#N/A	#N/A	#N/A	#N/A	#N/A	AT3G56730	500	240
AT1G45249	Chr1:17165127-17167907[-]	ABF2	abscisic acid responsive elements-binding factor 2	Chr1:17164877-17165126[-]	250	0	0	0.0559562	0.148701	1.00789	No	Sense	#N/A	#N/A	#N/A	#N/A	#N/A	AT1G45248	347	97
AT1G51200	Chr1:18984419-18986653[+]	#N/A	A20/AN1-like zinc finger family protein	Chr1:18986654-18986883[+]	230	0	0	0	0.346354	1.00424	No	Sense	#N/A	#N/A	#N/A	#N/A	#N/A	AT1G51210	1155	925
AT4G33905	Chr4:16253815-16255612[-]	#N/A	Peroxisomal membrane 22 kDa (Mpv17/PMP22) family protein	Chr4:16253585-16253814[-]	230	0	0.12635	0.831234	0.0230902	1.00424	No	Sense	#N/A	#N/A	#N/A	#N/A	#N/A	AT4G33900	1103	873
AT2G36270	Chr2:15204764-15207528[-]	ABI5, GIA1	Basic-leucine zipper (bZIP) transcription factor family protein	Chr2:15204434-15204763[-]	330	0	0.088062	0.211955	0.273584	1.00216	No	Sense	#N/A	#N/A	#N/A	#N/A	#N/A	AT2G36261	617	287
AT3G55440	Chr3:20553690-20556560[+]	ATCTIMC, TPI, CYTOTPI	triosephosphate isomerase	Chr3:20556561-20557090[+]	530	0	0.0109662	0.00879815	0.450913	1.00036	No	Sense	#N/A	#N/A	#N/A	#N/A	#N/A	AT3G55450	1338	808
AT1G04410	Chr1:1189078-1191412[-]	#N/A	Lactate/malate dehydrogenase family protein	Chr1:1188828-1189027[-]	200	0	0	0.0233151	0.504522	0.971144	No	Sense	#N/A	#N/A	#N/A	#N/A	#N/A	AT1G04400	560	310
AT2G20360	Chr2:8785988-8789473[+]	#N/A	NAD(P)-binding Rossmann-fold superfamily protein	Chr2:8789494-8789739[+]	246	0	0.0708792	0.0568661	0.28065	0.874905	No	Sense	#N/A	#N/A	#N/A	#N/A	#N/A	AT2G20362	266	0
AT3G27080	Chr3:9985079-9986629[-]	TOM20-3	translocase of outer membrane 20 kDa subunit 3	Chr3:9984745-9985008[-]	264	0	0	0.0353259	0.40233	0.795368	No	Sense	#N/A	#N/A	#N/A	#N/A	#N/A	AT3G27070	334	0
AT2G32060	Chr2:13639016-13640370[-]	#N/A	Ribosomal protein L7Ae/L30e/S12e/Gadd45 family protein	Chr2:13638644-13638975[-]	332	0	0.0875315	0	0.623854	0.790577	No	Sense	#N/A	#N/A	#N/A	#N/A	#N/A	AT2G32050	372	0
AT3G26910	Chr3:9915111-9918784[-]	#N/A	hydroxyproline-rich glycoprotein family protein	Chr3:9914861-9915090[-]	230	0	0.02527	0.020274	0.300173	0.684708	No	Sense	#N/A	#N/A	#N/A	#N/A	#N/A	AT3G26900	596	346
AT5G14970	Chr5:4847278-4848867[+]	#N/A	unknown protein; BEST Arabidopsis thaliana protein match is: unknown protein (TAIR:AT2G14910.1); Has 579 Blast hits to 397 proteins in 95 species: Archae - 0; Bacteria - 294; Metazoa - 0; Fungi - 0; Plants - 86; Viruses - 0; Other Eukaryotes - 199 (source: NCBI BLink).	Chr5:4848878-4849167[+]	290	0	0.12025	0.0643175	0.531076	0.669755	No	Sense	#N/A	#N/A	#N/A	#N/A	#N/A	AT5G14980	732	432
AT3G46010	Chr3:16909363-16910820[-]	ADF1, atadf, ATADF1	actin depolymerizing factor 1	Chr3:16909133-16909342[-]	210	0	0.0276766	0.0222049	0.37934	0.649929	No	Sense	#N/A	#N/A	#N/A	#N/A	#N/A	AT3G46000	363	133
AT1G01710	Chr1:262828-267771[+]	#N/A	Acyl-CoA thioesterase family protein	Chr1:267792-268011[+]	220	0	0.0792558	0.19076	0.241398	0.644248	No	Sense	#N/A	#N/A	#N/A	#N/A	#N/A	AT1G01720	558	318
AT4G27830	Chr4:13861718-13864500[-]	BGLU10	beta glucosidase 10	Chr4:13861398-13861657[-]	260	0	0	0.0538041	0.142982	0.625893	No	Sense	#N/A	#N/A	#N/A	#N/A	#N/A	AT4G27820	1146	826
AT5G08040	Chr5:2577202-2578119[-]	TOM5	mitochondrial import receptor subunit TOM5 homolog	Chr5:2576784-2577051[-]	268	0	0.0216869	0	0.118898	0.587623	No	Sense	#N/A	#N/A	#N/A	#N/A	#N/A	AT5G08030	418	0
AT1G56660	Chr1:21237888-21240558[+]	#N/A	unknown protein; Has 665200 Blast hits to 205811 proteins in 4684 species: Archae - 3320; Bacteria - 107592; Metazoa - 249086; Fungi - 76753; Plants - 38542; Viruses - 3008; Other Eukaryotes - 186899 (source: NCBI BLink).	Chr1:21240579-21241058[+]	480	0	0	0.0310868	0.649092	0.536608	No	Sense	#N/A	#N/A	#N/A	#N/A	#N/A	AT1G56670	1114	644
AT1G61210	Chr1:22564495-22571907[+]	#N/A	Transducin/WD40 repeat-like superfamily protein	Chr1:22571948-22572177[+]	230	0	0.0505399	0.060822	0.230902	0.524943	No	Sense	#N/A	#N/A	#N/A	#N/A	#N/A	AT1G61215	737	467
AT5G48580	Chr5:19695929-19698712[-]	FKBP15-2	FK506- and rapamycin-binding protein 15 kD-2	Chr5:19695569-19695848[-]	280	0	0.0622724	0.0333073	0.284505	0.487447	No	Sense	#N/A	#N/A	#N/A	#N/A	#N/A	AT5G48575	863	503
AT3G14020	Chr3:4642280-4644301[+]	NF-YA6	nuclear factor Y, subunit A6	Chr3:4644532-4644897[+]	366	0	0.0317601	0.025481	0.362757	0.458966	No	Sense	#N/A	#N/A	#N/A	#N/A	#N/A	AT3G14025	596	0
AT2G32390	Chr2:13748441-13751933[-]	GLR3.5	glutamate receptor 3.5	Chr2:13748131-13748350[-]	220	0	0.105674	0.0635866	0.241398	0.429499	No	Sense	#N/A	#N/A	#N/A	#N/A	#N/A	AT2G32380	649	339
AT1G60690	Chr1:22349892-22351668[-]	#N/A	NAD(P)-linked oxidoreductase superfamily protein	Chr1:22349322-22349801[-]	480	0	0.0121085	0.0194292	0.221281	0.426516	No	Sense	#N/A	#N/A	#N/A	#N/A	#N/A	AT1G60680	594	24
AT2G29700	Chr2:12697420-12698167[+]	ATPH1, PH1	pleckstrin homologue 1	Chr2:12698218-12698672[+]	455	0	0.0127738	0.0204968	0.128392	0.392265	No	Sense	#N/A	#N/A	#N/A	#N/A	#N/A	AT2G29710	505	0
AT3G04920	Chr3:1360882-1362295[+]	#N/A	Ribosomal protein S24e family protein	Chr3:1362446-1362904[+]	459	0	0.025325	0.0101591	0.208265	0.320227	No	Sense	#N/A	#N/A	#N/A	#N/A	#N/A	AT3G04930	609	0
AT2G34585	Chr2:14568047-14568637[-]	#N/A	unknown protein; FUNCTIONS IN: molecular_function unknown; INVOLVED IN: biological_process unknown; LOCATED IN: plasma membrane, vacuole; EXPRESSED IN: 24 plant structures; EXPRESSED DURING: 15 growth stages; Has 43 Blast hits to 43 proteins in 9 species: Archae - 0; Bacteria - 0; Metazoa - 0; Fungi - 0; Plants - 43; Viruses - 0; Other Eukaryotes - 0 (source: NCBI BLink).	Chr2:14567674-14567976[-]	303	0	0.0191818	0.030779	0.0175272	0.259873	No	Sense	#N/A	#N/A	#N/A	#N/A	#N/A	AT2G34580	373	0
AT4G33865	Chr4:16233209-16234196[-]	#N/A	Ribosomal protein S14p/S29e family protein	Chr4:16232869-16233128[-]	260	0	0.0447084	0.0179347	0.040852	0.242281	No	Sense	#N/A	#N/A	#N/A	#N/A	#N/A	AT4G33860	874	534
AT1G19570	Chr1:6773302-6774528[-]	DHAR1, ATDHAR1, DHAR5	dehydroascorbate reductase	Chr1:6771092-6773281[-]	2190	0.038726	0.138637	0.126201	1.93672	14.2168	Yes	Sense	#N/A	#N/A	#N/A	#N/A	#N/A	AT1G19560	2549	349
AT4G39330	Chr4:18291218-18293383[+]	ATCAD9, CAD9	cinnamyl alcohol dehydrogenase 9	Chr4:18293464-18293779[+]	316	0.250463	3.5314	2.78896	9.52911	74.7379	No	Sense	#N/A	#N/A	#N/A	#N/A	#N/A	AT4G39345	396	0
AT3G44860	Chr3:16379633-16381070[+]	FAMT	farnesoic acid carboxyl-O-methyltransferase	Chr3:16381081-16381410[+]	330	0.0319783	0.140899	0.226086	4.7314	8.49453	No	Sense	#N/A	#N/A	#N/A	#N/A	#N/A	AT3G44870	1148	808
AT5G20190	Chr5:6814093-6815379[+]	#N/A	Tetratricopeptide repeat (TPR)-like superfamily protein	Chr5:6815400-6816389[+]	990	0.0266486	0.140899	0.0942024	1.8239	6.53262	No	Sense	#N/A	#N/A	#N/A	#N/A	#N/A	AT5G20200	1327	317
AT1G17940	Chr1:6169341-6173222[-]	#N/A	Endosomal targeting BRO1-like domain-containing protein	Chr1:6168961-6169340[-]	380	0.0138853	0.0611799	0.33132	0.209635	3.30161	No	Sense	#N/A	#N/A	#N/A	#N/A	#N/A	AT1G17930	501	121
AT4G16950	Chr4:9538798-9544467[-]	RPP5	Disease resistance protein (TIR-NBS-LRR class) family	Chr4:9537605-9538777[-]	1173	0.0134947	0.104053	0.0477035	2.79347	3.17293	Yes	Sense	#N/A	#N/A	#N/A	#N/A	#N/A	AT4G16940	1193	0
AT3G26980	Chr3:9946166-9948040[-]	MUB4	membrane-anchored ubiquitin-fold protein 4 precursor	Chr3:9945580-9946035[-]	456	0.0115711	0.0892207	0.0715814	2.84172	2.46355	No	Sense	#N/A	#N/A	#N/A	#N/A	#N/A	AT3G26960	586	0
AT1G68530	Chr1:25712588-25714807[-]	CUT1, POP1, CER6, G2, KCS6	3-ketoacyl-CoA synthase 6	Chr1:25712239-25712577[-]	339	0.0155647	0.0342896	0	0.422981	2.98861	No	Sense	#N/A	#N/A	#N/A	#N/A	#N/A	AT1G68526	349	0
AT1G17380	Chr1:5955488-5957212[-]	JAZ5, TIFY11A	jasmonate-zim-domain protein 5	Chr1:5955038-5955487[-]	450	0.0117254	0.0129158	0	1.30999	2.20476	No	Sense	#N/A	#N/A	#N/A	#N/A	#N/A	AT1G17370	450	0
AT1G56070	Chr1:20967930-20971742[-]	LOS1	Ribosomal protein S5/Elongation factor G/III/V family protein	Chr1:20967145-20967859[-]	715	0.0295184	0.081288	0.0195651	3.3053	5.10259	No	Sense	#N/A	#N/A	#N/A	#N/A	#N/A	AT1G56060	785	0
AT5G13000	Chr5:4110295-4121427[-]	ATGSL12, gsl12	glucan synthase-like 12	Chr5:4109769-4110294[-]	526	0.0100312	0.154694	0.0709204	0.333184	1.71654	No	Sense	#N/A	#N/A	#N/A	#N/A	#N/A	AT5G12990	526	0
AT5G03204	Chr5:762287-762397[-]	#N/A	unknown protein; Has 30201 Blast hits to 17322 proteins in 780 species: Archae - 12; Bacteria - 1396; Metazoa - 17338; Fungi - 3422; Plants - 5037; Viruses - 0; Other Eukaryotes - 2996 (source: NCBI BLink).	Chr5:761804-762286[-]	483	0.0109243	0.1805	0.415134	0.263888	1.80415	No	Sense	#N/A	#N/A	#N/A	#N/A	#N/A	AT5G03200	483	0
AT3G63052	Chr3:23298911-23299111[-]	#N/A	unknown protein; Has 30201 Blast hits to 17322 proteins in 780 species: Archae - 12; Bacteria - 1396; Metazoa - 17338; Fungi - 3422; Plants - 5037; Viruses - 0; Other Eukaryotes - 2996 (source: NCBI BLink).	Chr3:23298390-23298900[-]	511	0.0206513	0.11374	0.182506	0.311786	3.07158	No	Sense	#N/A	#N/A	#N/A	#N/A	#N/A	AT3G63050	521	0
AT4G32020	Chr4:15487944-15489450[+]	#N/A	unknown protein; FUNCTIONS IN: molecular_function unknown; INVOLVED IN: biological_process unknown; LOCATED IN: chloroplast; EXPRESSED IN: 24 plant structures; EXPRESSED DURING: 15 growth stages; BEST Arabidopsis thaliana protein match is: unknown protein (TAIR:AT2G25250.1); Has 65 Blast hits to 65 proteins in 19 species: Archae - 0; Bacteria - 0; Metazoa - 3; Fungi - 8; Plants - 54; Viruses - 0;…	Chr4:15489451-15490220[+]	770	0.00685249	0.0226445	0	0.869033	1.00898	No	Sense	#N/A	#N/A	#N/A	#N/A	#N/A	AT4G32030	1289	519
AT1G70900	Chr1:26731813-26733875[+]	#N/A	unknown protein; BEST Arabidopsis thaliana protein match is: unknown protein (TAIR:AT1G23110.4); Has 57 Blast hits to 57 proteins in 14 species: Archae - 0; Bacteria - 0; Metazoa - 0; Fungi - 0; Plants - 57; Viruses - 0; Other Eukaryotes - 0 (source: NCBI BLink).	Chr1:26733876-26734154[+]	279	0.0189119	0.312478	0.30084	0.704294	2.61531	No	Sense	#N/A	#N/A	#N/A	#N/A	#N/A	AT1G70910	279	0
AT1G20110	Chr1:6971485-6974835[+]	#N/A	RING/FYVE/PHD zinc finger superfamily protein	Chr1:6974906-6975387[+]	482	0.0218938	0.0241166	0.0483716	0.95858	2.70095	No	Sense	#N/A	#N/A	#N/A	#N/A	#N/A	AT1G20120	552	0
AT1G01620	Chr1:225665-227302[-]	PIP1C, TMP-B, PIP1;3	plasma membrane intrinsic protein 1C	Chr1:225255-225664[-]	410	0.0386079	0	0	0.207249	4.51963	No	Sense	#N/A	#N/A	#N/A	#N/A	#N/A	AT1G01610	1324	914
AT3G51510	Chr3:19109062-19110051[+]	#N/A	unknown protein; FUNCTIONS IN: molecular_function unknown; INVOLVED IN: biological_process unknown; LOCATED IN: chloroplast thylakoid membrane, chloroplast; EXPRESSED IN: 22 plant structures; EXPRESSED DURING: 13 growth stages; Has 42 Blast hits to 42 proteins in 19 species: Archae - 0; Bacteria - 0; Metazoa - 0; Fungi - 0; Plants - 40; Viruses - 0; Other Eukaryotes - 2 (source: NCBI BLink).	Chr3:19110382-19110595[+]	214	0.0246562	0.217274	0.0653694	1.16638	2.87001	No	Sense	#N/A	#N/A	#N/A	#N/A	#N/A	AT3G51520	544	0
AT5G15650	Chr5:5092157-5094494[+]	RGP2, ATRGP2	reversibly glycosylated polypeptide 2	Chr5:5094495-5095334[+]	840	0.0502516	0.124545	0.166536	2.33294	5.37442	Yes	Sense	#N/A	#N/A	#N/A	#N/A	#N/A	AT5G15660	1157	317
AT5G20380	Chr5:6887725-6892432[-]	PHT4;5	phosphate transporter 4;5	Chr5:6887459-6887724[-]	266	0.0198362	0.1311	0.0701206	0.658853	1.97347	No	Sense	#N/A	#N/A	#N/A	#N/A	#N/A	AT5G20370	266	0
AT3G61420	Chr3:22727040-22731954[-]	#N/A	BSD domain (BTF2-like transcription factors, Synapse-associated proteins and DOS2-like proteins)	Chr3:22726425-22726789[-]	365	0.0144559	0.0796177	0.0894278	0.0582001	1.40944	No	Sense	#N/A	#N/A	#N/A	#N/A	#N/A	AT3G61415	615	0
AT1G16080	Chr1:5514317-5516027[+]	#N/A	unknown protein; LOCATED IN: apoplast, chloroplast stroma, chloroplast, chloroplast envelope; EXPRESSED IN: 23 plant structures; EXPRESSED DURING: 14 growth stages; Has 81 Blast hits to 81 proteins in 28 species: Archae - 0; Bacteria - 2; Metazoa - 0; Fungi - 0; Plants - 62; Viruses - 0; Other Eukaryotes - 17 (source: NCBI BLink).	Chr1:5516028-5516258[+]	231	0.0228416	0.503211	0.383538	1.14951	2.11341	No	Sense	#N/A	#N/A	#N/A	#N/A	#N/A	AT1G16090	231	0
AT3G60770	Chr3:22460189-22461779[-]	#N/A	Ribosomal protein S13/S15	Chr3:22459203-22460178[-]	976	0.0216247	0.0655051	0.0286661	0.96856	1.93089	No	Sense	#N/A	#N/A	#N/A	#N/A	#N/A	AT3G60760	986	0
AT3G18500	Chr3:6352477-6355442[+]	#N/A	DNAse I-like superfamily protein	Chr3:6355443-6355663[+]	221	0.0238752	0.0262991	0.0210996	0.672856	2.11402	No	Sense	#N/A	#N/A	#N/A	#N/A	#N/A	AT3G18510	221	0
AT4G02080	Chr4:921454-922777[+]	ASAR1, ATSARA1C, ATSAR2, SAR2	secretion-associated RAS super family 2	Chr4:922778-923099[+]	322	0.0163864	0.12635	0.20274	1.17101	1.41832	No	Sense	#N/A	#N/A	#N/A	#N/A	#N/A	AT4G02090	322	0
AT3G55630	Chr3:20636669-20639492[+]	ATDFD, DFD, FPGS3	DHFS-FPGS homolog D	Chr3:20639493-20639832[+]	340	0.0155189	0.153849	0.123433	0.780993	1.34324	No	Sense	#N/A	#N/A	#N/A	#N/A	#N/A	AT3G55640	340	0
AT2G25490	Chr2:10847375-10850532[-]	EBF1, FBL6	EIN3-binding F box protein 1	Chr2:10846935-10847374[-]	440	0.0119919	0	0.0105978	0.953522	1.01409	No	Sense	#N/A	#N/A	#N/A	#N/A	#N/A	AT2G25482	1026	586
AT4G30650	Chr4:14954320-14954968[+]	#N/A	Low temperature and salt responsive protein family	Chr4:14954989-14955372[+]	384	0.0549627	0.10595	0.752883	0.594694	4.30617	No	Sense	#N/A	#N/A	#N/A	#N/A	#N/A	AT4G30660	404	0
AT5G19240	Chr5:6470129-6471062[+]	#N/A	Glycoprotein membrane precursor GPI-anchored	Chr5:6471083-6471572[+]	490	0.0430728	0.0355842	0.0380655	4.758	3.27821	No	Sense	#N/A	#N/A	#N/A	#N/A	#N/A	AT5G19250	843	333
AT3G45650	Chr3:16759253-16761266[+]	NAXT1	nitrate excretion transporter1	Chr3:16761417-16762204[+]	788	0.0200879	0.00737575	0	0.72787	1.49222	No	Sense	#N/A	#N/A	#N/A	#N/A	#N/A	AT3G45660	938	0
AT1G34190	Chr1:12451451-12454142[+]	anac017, NAC017	NAC domain containing protein 17	Chr1:12454143-12454712[+]	570	0.0370275	0.0713766	0.0981688	1.45347	2.64313	No	Sense	#N/A	#N/A	#N/A	#N/A	#N/A	AT1G34200	1565	995
AT2G21210	Chr2:9085210-9085909[-]	#N/A	SAUR-like auxin-responsive protein family	Chr2:9084376-9084989[-]	614	0.644514	2.43275	0.721477	56.0051	45.4495	No	Sense	#N/A	#N/A	#N/A	#N/A	#N/A	AT2G21200	834	0
AT5G03890	Chr5:1047150-1047689[+]	#N/A	unknown protein; INVOLVED IN: N-terminal protein myristoylation; LOCATED IN: cellular_component unknown; BEST Arabidopsis thaliana protein match is: unknown protein (TAIR:AT3G10120.1); Has 1807 Blast hits to 1807 proteins in 277 species: Archae - 0; Bacteria - 0; Metazoa - 736; Fungi - 347; Plants - 385; Viruses - 0; Other Eukaryotes - 339 (source: NCBI BLink).	Chr5:1047700-1047959[+]	260	0.0405878	0.134125	0.107608	0.837465	2.84681	No	Sense	#N/A	#N/A	#N/A	#N/A	#N/A	AT5G03900	605	335
AT3G25530	Chr3:9271800-9273615[-]	GHBDH, ATGHBDH, GLYR1, GR1	glyoxylate reductase 1	Chr3:9271401-9271699[-]	299	0.0176469	0.0777537	0.124763	0.497328	1.19385	No	Sense	#N/A	#N/A	#N/A	#N/A	#N/A	AT3G25520	399	0
AT3G49880	Chr3:18496249-18498713[+]	#N/A	glycosyl hydrolase family protein 43	Chr3:18498724-18499169[+]	446	0.0354916	0.130316	0.115007	0.452486	2.36577	No	Sense	#N/A	#N/A	#N/A	#N/A	#N/A	AT3G49890	456	0
AT1G51770	Chr1:19201789-19203224[+]	#N/A	Core-2/I-branching beta-1,6-N-acetylglucosaminyltransferase family protein	Chr1:19203225-19203534[+]	310	0.0170207	0.0187487	0.030084	0.394024	1.13455	No	Sense	#N/A	#N/A	#N/A	#N/A	#N/A	AT1G51780	1287	977
AT5G66050	Chr5:26412088-26414536[-]	#N/A	Wound-responsive family protein	Chr5:26411658-26412067[-]	410	0.0386079	0.0567033	0.0682393	1.16578	2.5607	No	Sense	#N/A	#N/A	#N/A	#N/A	#N/A	AT5G66045	430	0
AT5G45750	Chr5:18559116-18560842[+]	AtRABA1c, RABA1c	RAB GTPase homolog A1C	Chr5:18560843-18561110[+]	268	0.0196881	0.0650607	0.121795	0.753018	1.27318	No	Sense	#N/A	#N/A	#N/A	#N/A	#N/A	AT5G45760	268	0
AT2G21630	Chr2:9250323-9253915[+]	#N/A	Sec23/Sec24 protein transport family protein	Chr2:9253916-9254458[+]	543	0.0194343	0.0107037	0	0.176047	1.25677	No	Sense	#N/A	#N/A	#N/A	#N/A	#N/A	AT2G21640	543	0
AT5G59160	Chr5:23879337-23881688[+]	TOPP2, PPO	type one serine/threonine protein phosphatase 2	Chr5:23881689-23881987[+]	299	0.0176469	0	0.0311908	0.550613	1.14118	No	Sense	#N/A	#N/A	#N/A	#N/A	#N/A	AT5G59170	299	0
AT2G17560	Chr2:7642165-7643667[-]	HMGB4, NFD4, NFD04	high mobility group B4	Chr2:7641145-7642164[-]	1020	0.0155189	0.0398869	0.109718	0.333224	1.00357	No	Sense	#N/A	#N/A	#N/A	#N/A	#N/A	AT2G17556	1393	373
AT4G32620	Chr4:15731508-15737272[+]	#N/A	Enhancer of polycomb-like transcription factor protein	Chr4:15737613-15737967[+]	355	0.0148631	0.196465	0.157623	0.463756	0.961163	No	Sense	#N/A	#N/A	#N/A	#N/A	#N/A	AT4G32630	695	0
AT4G22745	Chr4:11947313-11948757[-]	MBD1	methyl-CPG-binding domain 1	Chr4:11946503-11947252[-]	750	0.00703522	0.0464967	0.0497389	0.0991341	0.454951	No	Sense	#N/A	#N/A	#N/A	#N/A	#N/A	AT4G22740	1356	546
AT1G68526	Chr1:25711869-25712238[-]	#N/A	unknown protein; FUNCTIONS IN: molecular_function unknown; INVOLVED IN: biological_process unknown; LOCATED IN: cellular_component unknown; Has 0 Blast hits to 0 proteins in 0 species (source: NCBI BLink).	Chr1:25711509-25711868[-]	360	0.0439701	0.0322894	0.0518113	0.516323	2.81428	No	Sense	#N/A	#N/A	#N/A	#N/A	#N/A	AT1G68520	961	601
AT5G46470	Chr5:18842701-18849741[+]	RPS6	disease resistance protein (TIR-NBS-LRR class) family	Chr5:18850182-18850451[+]	270	0.0195423	0.215263	0.0345409	0.767109	1.24431	No	Sense	#N/A	#N/A	#N/A	#N/A	#N/A	AT5G46490	1034	324
AT5G20010	Chr5:6760284-6762094[+]	RAN-1, RAN1, ATRAN1	RAS-related nuclear protein-1	Chr5:6762125-6762723[+]	599	0.0264261	0.0582179	0.0389234	2.26971	1.67386	Yes	Sense	#N/A	#N/A	#N/A	#N/A	#N/A	AT5G20020	629	0
AT4G02350	Chr4:1038114-1040774[+]	SEC15B	exocyst complex component sec15B	Chr4:1040785-1041141[+]	357	0.0443396	0.0325607	0.143678	1.87438	2.69088	No	Sense	#N/A	#N/A	#N/A	#N/A	#N/A	AT4G02360	367	0
AT1G24020	Chr1:8500400-8502065[-]	MLP423	MLP-like protein 423	Chr1:8500080-8500399[-]	320	0.0164888	0.108977	0.0728597	0.580864	1.00067	No	Sense	#N/A	#N/A	#N/A	#N/A	#N/A	AT1G24010	900	580
AT1G27320	Chr1:9487780-9492572[+]	AHK3, HK3	histidine kinase 3	Chr1:9492573-9492963[+]	391	0.0269893	0	0.0119259	0.92361	1.61108	No	Sense	#N/A	#N/A	#N/A	#N/A	#N/A	AT1G27330	391	0
AT1G42470	Chr1:15926987-15935208[+]	#N/A	Patched family protein	Chr1:15935299-15935848[+]	550	0.00959349	0.0528372	0.0763039	0.415205	0.572665	No	Sense	#N/A	#N/A	#N/A	#N/A	#N/A	AT1G42480	998	358
AT2G27980	Chr2:11913629-11919741[-]	#N/A	Acyl-CoA N-acyltransferase with RING/FYVE/PHD-type zinc finger domain	Chr2:11913329-11913628[-]	300	0.0175881	0.0193736	0.0155434	0.531076	1.03239	No	Sense	#N/A	#N/A	#N/A	#N/A	#N/A	AT2G27970	331	31
AT5G54940	Chr5:22308271-22309410[-]	#N/A	Translation initiation factor SUI1 family protein	Chr5:22307565-22308030[-]	466	0.0113228	0.0124723	0	0.136758	0.653362	No	Sense	#N/A	#N/A	#N/A	#N/A	#N/A	AT5G54930	706	0
AT1G10370	Chr1:3397081-3398358[-]	GST30, ATGSTU17, GST30B, ERD9	Glutathione S-transferase family protein	Chr1:3396850-3397080[-]	231	0.388308	0.704496	0.504656	4.48311	22.2476	No	Sense	#N/A	#N/A	#N/A	#N/A	#N/A	AT1G10360	231	0
AT3G46450	Chr3:17092938-17095639[-]	#N/A	SEC14 cytosolic factor family protein / phosphoglyceride transfer family protein	Chr3:17092548-17092917[-]	370	0.0142606	0.109958	0.113425	0.330128	0.780321	No	Sense	#N/A	#N/A	#N/A	#N/A	#N/A	AT3G46440	1062	672
AT1G71000	Chr1:26769336-26770111[-]	#N/A	Chaperone DnaJ-domain superfamily protein	Chr1:26768786-26769255[-]	470	0.224528	0.148394	0.75402	0.21469	12.2412	No	Sense	#N/A	#N/A	#N/A	#N/A	#N/A	AT1G70990	1259	709
AT4G34138	Chr4:16348106-16349982[-]	UGT73B1	UDP-glucosyl transferase 73B1	Chr4:16347896-16348105[-]	210	0.0251258	0.0276766	0.0666146	0.252893	1.34985	No	Sense	#N/A	#N/A	#N/A	#N/A	#N/A	AT4G34135	972	762
AT5G67270	Chr5:26840070-26842081[-]	ATEB1C, EB1C, ATEB1H1	end binding protein 1C	Chr5:26839837-26840069[-]	233	0.0226456	0.0997784	0.0600389	0.205136	1.19408	No	Sense	#N/A	#N/A	#N/A	#N/A	#N/A	AT5G67265	233	0
AT4G18210	Chr4:10076079-10077748[+]	ATPUP10, PUP10	purine permease 10	Chr4:10077749-10078028[+]	280	0.0376887	0.0830299	0.36638	0.891448	1.96854	No	Sense	#N/A	#N/A	#N/A	#N/A	#N/A	AT4G18220	1019	739
AT1G70320	Chr1:26488522-26501281[-]	UPL2	ubiquitin-protein ligase 2	Chr1:26488062-26488521[-]	460	0.0344114	0.0758099	0.060822	0.773523	1.79165	No	Sense	#N/A	#N/A	#N/A	#N/A	#N/A	AT1G70310	1086	626
AT5G35690	Chr5:13864852-13868238[-]	#N/A	CONTAINS InterPro DOMAIN/s: WLM (InterPro:IPR013536), PUB domain (InterPro:IPR018997), PUG domain (InterPro:IPR006567); BEST Arabidopsis thaliana protein match is: zinc ion binding (TAIR:AT1G55915.1); Has 30201 Blast hits to 17322 proteins in 780 species: Archae - 12; Bacteria - 1396; Metazoa - 17338; Fungi - 3422; Plants - 5037; Viruses - 0; Other Eukaryotes - 2996 (source: NCBI BLink).	Chr5:13864582-13864851[-]	270	0.0195423	0.0645788	0.0690818	1.21951	1.011	No	Sense	#N/A	#N/A	#N/A	#N/A	#N/A	AT5G35688	484	214
AT5G17050	Chr5:5607788-5609492[-]	UGT78D2	UDP-glucosyl transferase 78D2	Chr5:5607168-5607757[-]	590	0.0268292	0.118212	0.0632274	0.819117	1.36129	No	Sense	#N/A	#N/A	#N/A	#N/A	#N/A	AT5G17040	817	197
AT4G22980	Chr4:12043966-12045701[-]	#N/A	FUNCTIONS IN: molecular_function unknown; INVOLVED IN: biological_process unknown; LOCATED IN: chloroplast; EXPRESSED IN: 13 plant structures; EXPRESSED DURING: 9 growth stages; BEST Arabidopsis thaliana protein match is: Pyridoxal phosphate (PLP)-dependent transferases superfamily protein (TAIR:AT5G51920.1); Has 520 Blast hits to 468 proteins in 130 species: Archae - 5; Bacteria - 23; Metazoa - …	Chr4:12043729-12043965[-]	237	0.0222634	0.34333	0.432854	0.605023	1.12962	No	Sense	#N/A	#N/A	#N/A	#N/A	#N/A	AT4G22970	237	0
AT1G01100	Chr1:50075-51199[-]	#N/A	60S acidic ribosomal protein family	Chr1:49685-50014[-]	330	0.0159891	0.0176124	0.0141304	0.386237	0.811275	No	Sense	#N/A	#N/A	#N/A	#N/A	#N/A	AT1G01090	788	398
AT2G21580	Chr2:9236523-9237811[+]	#N/A	Ribosomal protein S25 family protein	Chr2:9237822-9238191[+]	370	0.0142606	0.172792	0.0630138	0.301421	0.72357	No	Sense	#N/A	#N/A	#N/A	#N/A	#N/A	AT2G21590	670	290
AT3G21660	Chr3:7624495-7626654[-]	#N/A	UBX domain-containing protein	Chr3:7624077-7624444[-]	368	0.0286762	0.315875	0	0.432942	1.41221	No	Sense	#N/A	#N/A	#N/A	#N/A	#N/A	AT3G21650	418	0
AT1G33260	Chr1:12064509-12066376[+]	#N/A	Protein kinase superfamily protein	Chr1:12066387-12066594[+]	208	0.0253674	0.111771	0.0896734	0.0255325	1.23664	No	Sense	#N/A	#N/A	#N/A	#N/A	#N/A	AT1G33265	218	0
AT4G13530	Chr4:7866719-7868742[+]	#N/A	unknown protein; BEST Arabidopsis thaliana protein match is: unknown protein (TAIR:AT4G10080.1); Has 30201 Blast hits to 17322 proteins in 780 species: Archae - 12; Bacteria - 1396; Metazoa - 17338; Fungi - 3422; Plants - 5037; Viruses - 0; Other Eukaryotes - 2996 (source: NCBI BLink).	Chr4:7868753-7869012[+]	260	0.0202939	0.0223542	0.107608	0.449372	0.989315	No	Sense	#N/A	#N/A	#N/A	#N/A	#N/A	AT4G13540	1131	861
AT3G06050	Chr3:1826073-1827861[-]	PRXIIF, ATPRXIIF	peroxiredoxin IIF	Chr3:1825664-1826012[-]	349	0.0151187	0.0333071	0.0133611	0.25869	0.737026	No	Sense	#N/A	#N/A	#N/A	#N/A	#N/A	AT3G06040	409	0
AT1G60270	Chr1:22221677-22224257[-]	BGLU6	beta glucosidase 6	Chr1:22221410-22221626[-]	217	0.0729459	0.214271	0.322328	2.10472	3.50768	No	Sense	#N/A	#N/A	#N/A	#N/A	#N/A	AT1G60260	267	0
AT2G44060	Chr2:18226317-18228151[+]	#N/A	Late embryogenesis abundant protein, group 2	Chr2:18228182-18228472[+]	291	0.0543961	0.459375	0.400603	0.474501	2.59766	No	Sense	#N/A	#N/A	#N/A	#N/A	#N/A	AT2G44065	321	0
AT4G00170	Chr4:70477-72211[-]	#N/A	Plant VAMP (vesicle-associated membrane protein) family protein	Chr4:70187-70466[-]	280	0.0211057	0.162739	0.149217	0.998422	1.00789	No	Sense	#N/A	#N/A	#N/A	#N/A	#N/A	AT4G00165	592	332
AT2G46080	Chr2:18948117-18950105[-]	#N/A	CONTAINS InterPro DOMAIN/s: Protein BYPASS related (InterPro:IPR008511); BEST Arabidopsis thaliana protein match is: Protein of unknown function (DUF793) (TAIR:AT1G01550.2); Has 153 Blast hits to 139 proteins in 20 species: Archae - 0; Bacteria - 2; Metazoa - 1; Fungi - 0; Plants - 150; Viruses - 0; Other Eukaryotes - 0 (source: NCBI BLink).	Chr2:18947824-18948116[-]	293	0.0360165	0.079346	0.143233	0.688767	1.68412	No	Sense	#N/A	#N/A	#N/A	#N/A	#N/A	AT2G46070	293	0
AT4G35790	Chr4:16955518-16960170[-]	ATPLDDELTA, PLDDELTA	phospholipase D delta	Chr4:16955278-16955517[-]	240	0.0219851	0.0484341	0.25258	0.24341	1.02801	No	Sense	#N/A	#N/A	#N/A	#N/A	#N/A	AT4G35785	240	0
AT1G10410	Chr1:3416680-3419639[-]	#N/A	Protein of unknown function (DUF1336)	Chr1:3416359-3416639[-]	281	0.0563319	0.22752	0.215727	0.926075	2.61537	No	Sense	#N/A	#N/A	#N/A	#N/A	#N/A	AT1G10400	321	0
AT1G20460	Chr1:7091361-7092993[+]	#N/A	unknown protein; BEST Arabidopsis thaliana protein match is: unknown protein (TAIR:AT1G76185.1); Has 37 Blast hits to 37 proteins in 11 species: Archae - 0; Bacteria - 0; Metazoa - 0; Fungi - 0; Plants - 37; Viruses - 0; Other Eukaryotes - 0 (source: NCBI BLink).	Chr1:7093404-7093873[+]	470	0.0122707	0.0946155	0.0542211	0.481673	0.561567	No	Sense	#N/A	#N/A	#N/A	#N/A	#N/A	AT1G20470	1266	426
AT4G37910	Chr4:17825080-17828180[-]	mtHsc70-1	mitochondrial heat shock protein 70-1	Chr4:17824628-17825069[-]	442	0.0358128	0.210392	0.116048	1.38176	1.62709	No	Sense	#N/A	#N/A	#N/A	#N/A	#N/A	AT4G37900	452	0
AT4G34630	Chr4:16536865-16537746[-]	#N/A	unknown protein; Has 30 Blast hits to 30 proteins in 10 species: Archae - 0; Bacteria - 2; Metazoa - 0; Fungi - 0; Plants - 24; Viruses - 0; Other Eukaryotes - 4 (source: NCBI BLink).	Chr4:16536172-16536814[-]	643	0.0410297	0.0632732	0.0435118	0.49556	1.83689	No	Sense	#N/A	#N/A	#N/A	#N/A	#N/A	AT4G34620	693	0
AT3G06035	Chr3:1823099-1824216[-]	#N/A	Glycoprotein membrane precursor GPI-anchored	Chr3:1822869-1823098[-]	230	0.0229409	0	0.040548	0.138541	1.00424	No	Sense	#N/A	#N/A	#N/A	#N/A	#N/A	AT3G06030	258	28
AT3G05580	Chr3:1617847-1620120[-]	#N/A	Calcineurin-like metallo-phosphoesterase superfamily protein	Chr3:1617340-1617816[-]	477	0.0995551	0.158401	0.185739	2.03746	4.29199	No	Sense	#N/A	#N/A	#N/A	#N/A	#N/A	AT3G05570	507	0
AT4G24930	Chr4:12821223-12823742[-]	#N/A	thylakoid lumenal 17.9 kDa protein, chloroplast	Chr4:12820737-12821212[-]	476	0.0332547	0.0732617	0.137148	0.814465	1.43367	No	Sense	#N/A	#N/A	#N/A	#N/A	#N/A	AT4G24920	486	0
AT5G54960	Chr5:22310687-22312761[-]	PDC2	pyruvate decarboxylase-2	Chr5:22310243-22310676[-]	434	0.0486306	0.321406	0.279351	1.99459	2.09251	No	Sense	#N/A	#N/A	#N/A	#N/A	#N/A	AT5G54950	444	0
AT5G21090	Chr5:7164603-7167255[+]	#N/A	Leucine-rich repeat (LRR) family protein	Chr5:7167256-7167475[+]	220	0.0239837	0	0	0.458656	1.02602	No	Sense	#N/A	#N/A	#N/A	#N/A	#N/A	AT5G21100	928	708
AT5G13630	Chr5:4387334-4392227[-]	GUN5, CCH, CHLH, CCH1, ABAR	magnesium-chelatase subunit chlH, chloroplast, putative / Mg-protoporphyrin IX chelatase, putative (CHLH)	Chr5:4386944-4387333[-]	390	0.0270586	0.193736	0.0239129	0.776187	1.14411	No	Sense	#N/A	#N/A	#N/A	#N/A	#N/A	AT5G13620	960	570
AT3G04730	Chr3:1288612-1290602[-]	IAA16	indoleacetic acid-induced protein 16	Chr3:1287892-1288591[-]	700	0.0376887	0.116242	0.0333073	1.27458	1.58983	No	Sense	#N/A	#N/A	#N/A	#N/A	#N/A	AT3G04721	1514	794
AT3G20330	Chr3:7090106-7092670[-]	PYRB	PYRIMIDINE B	Chr3:7089886-7090105[-]	220	0.0239837	0.0264186	0.0423911	0.337957	1.00216	No	Sense	#N/A	#N/A	#N/A	#N/A	#N/A	AT3G20320	243	23
AT4G02410	Chr4:1059889-1062153[-]	#N/A	Concanavalin A-like lectin protein kinase family protein	Chr4:1059672-1059878[-]	207	0.0509799	0.224622	0.180213	1.18017	2.05412	No	Sense	#N/A	#N/A	#N/A	#N/A	#N/A	AT4G02405	217	0
AT5G60310	Chr5:24268011-24269982[+]	#N/A	Concanavalin A-like lectin protein kinase family protein	Chr5:24270043-24270432[+]	390	0.0541171	0.0894168	0.0717387	0.803422	2.16707	No	Sense	#N/A	#N/A	#N/A	#N/A	#N/A	AT5G60320	825	375
AT5G11500	Chr5:3676548-3679352[+]	#N/A	unknown protein; CONTAINS InterPro DOMAIN/s: Protein of unknown function DUF814 (InterPro:IPR008532); Has 1807 Blast hits to 1807 proteins in 277 species: Archae - 0; Bacteria - 0; Metazoa - 736; Fungi - 347; Plants - 385; Viruses - 0; Other Eukaryotes - 339 (source: NCBI BLink).	Chr5:3679353-3679552[+]	200	0.0263821	0.0290605	0.0699453	0.238984	1.04989	No	Sense	#N/A	#N/A	#N/A	#N/A	#N/A	AT5G11510	455	255
AT5G65920	Chr5:26364015-26365998[-]	#N/A	ARM repeat superfamily protein	Chr5:26363815-26364014[-]	200	0.0263821	0.0581209	0.0932604	0.716952	1.04989	No	Sense	#N/A	#N/A	#N/A	#N/A	#N/A	AT5G65910	554	354
AT5G18380	Chr5:6090049-6090761[-]	#N/A	Ribosomal protein S5 domain 2-like superfamily protein	Chr5:6088927-6089898[-]	972	0.0271421	0.0717542	0.0479734	0.371534	1.07473	No	Sense	#N/A	#N/A	#N/A	#N/A	#N/A	AT5G18370	1122	0
AT5G67320	Chr5:26857154-26861119[+]	HOS15	WD-40 repeat family protein	Chr5:26861120-26861726[+]	607	0.104311	0.143627	0.230462	1.1024	3.9868	No	Sense	#N/A	#N/A	#N/A	#N/A	#N/A	AT5G67330	607	0
AT1G73400	Chr1:27598106-27599812[+]	#N/A	Pentatricopeptide repeat (PPR) superfamily protein	Chr1:27600153-27600902[+]	750	0.0211057	0.0232484	0.142999	0.311564	0.797913	No	Sense	#N/A	#N/A	#N/A	#N/A	#N/A	AT1G73410	1819	729
AT1G51660	Chr1:19154323-19155947[+]	ATMKK4, MKK4, ATMEK4	mitogen-activated protein kinase kinase 4	Chr1:19155948-19156503[+]	556	0.0854096	0.52267	0.243215	1.73841	3.14399	No	Sense	#N/A	#N/A	#N/A	#N/A	#N/A	AT1G51670	556	0
AT2G22425	Chr2:9514936-9515535[+]	#N/A	Microsomal signal peptidase 12 kDa subunit (SPC12)	Chr2:9515546-9516605[+]	1060	0.0298665	0.0712804	0.0307935	0.3457	1.09941	No	Sense	#N/A	#N/A	#N/A	#N/A	#N/A	AT2G22426	1481	411
AT1G10350	Chr1:3393407-3395055[-]	#N/A	DNAJ heat shock family protein	Chr1:3392747-3393206[-]	460	0.0917638	0.164255	0.253425	0.646527	3.29801	No	Sense	#N/A	#N/A	#N/A	#N/A	#N/A	AT1G10340	835	175
AT3G47090	Chr3:17341512-17344645[-]	#N/A	Leucine-rich repeat protein kinase family protein	Chr3:17341082-17341501[-]	420	0.0376887	0.276766	0.0666146	0.708101	1.34985	No	Sense	#N/A	#N/A	#N/A	#N/A	#N/A	AT3G47080	1115	685
AT4G16890	Chr4:9500506-9505455[-]	SNC1, BAL	disease resistance protein (TIR-NBS-LRR class), putative	Chr4:9497466-9500255[-]	2790	0.0510621	0.127074	0.0885806	0.97459	1.81002	No	Sense	#N/A	#N/A	#N/A	#N/A	#N/A	AT4G16880	3192	152
AT3G49870	Chr3:18492408-18494139[-]	ATARLA1C, ARLA1C	ADP-ribosylation factor-like A1C	Chr3:18492178-18492387[-]	210	0.100503	0.0830299	0.0888194	0.278182	3.52462	No	Sense	#N/A	#N/A	#N/A	#N/A	#N/A	AT3G49860	230	0
AT4G24280	Chr4:12589988-12593630[+]	cpHsc70-1	chloroplast heat shock protein 70-1	Chr4:12593791-12594010[+]	220	0.0239837	0	0.0847822	0.506936	0.835136	No	Sense	#N/A	#N/A	#N/A	#N/A	#N/A	AT4G24290	651	271
AT1G71080	Chr1:26809841-26811842[-]	#N/A	RNA polymerase II transcription elongation factor	Chr1:26809505-26809780[-]	276	0.0191175	0.0421166	0.152055	0.0577256	0.665688	No	Sense	#N/A	#N/A	#N/A	#N/A	#N/A	AT1G71070	336	0
AT2G37470	Chr2:15736764-15737368[+]	#N/A	Histone superfamily protein	Chr2:15737429-15737841[+]	413	0.076655	0.253312	0.101615	1.17017	2.64378	No	Sense	#N/A	#N/A	#N/A	#N/A	#N/A	AT2G37478	473	0
AT1G10360	Chr1:3395558-3396849[-]	ATGSTU18, GST29, GSTU18	glutathione S-transferase TAU 18	Chr1:3395308-3395537[-]	230	0.0229409	0.02527	0	0.161632	0.776003	No	Sense	#N/A	#N/A	#N/A	#N/A	#N/A	AT1G10350	502	252
AT5G62000	Chr5:24910358-24915210[+]	ARF2, ARF1-BP, HSS, ORE14	auxin response factor 2	Chr5:24915231-24916088[+]	858	0.036898	0.060966	0.0869561	0.631349	1.22364	No	Sense	#N/A	#N/A	#N/A	#N/A	#N/A	AT5G62020	878	0
AT3G53420	Chr3:19803655-19805713[-]	PIP2A, PIP2, PIP2;1	plasma membrane intrinsic protein 2A	Chr3:19803295-19803644[-]	350	0.030151	0	0	0.0910415	0.989892	No	Sense	#N/A	#N/A	#N/A	#N/A	#N/A	AT3G53410	1326	966
AT1G01210	Chr1:88898-89745[+]	#N/A	DNA-directed RNA polymerase, subunit M, archaeal	Chr1:90616-90835[+]	220	0.0239837	0.0792558	0.0423911	0.313817	0.787414	No	Sense	#N/A	#N/A	#N/A	#N/A	#N/A	AT1G01220	1630	540
AT5G49550	Chr5:20106653-20107191[-]	BLOS2	Putative homolog of mammalian BLOC-1 Subunit 2. Protein - protein interaction with BLOS1.	Chr5:20106183-20106582[-]	400	0.013191	0.0145302	0.0582877	0.278815	0.433078	No	Sense	#N/A	#N/A	#N/A	#N/A	#N/A	AT5G49540	530	60
AT3G62320	Chr3:23061805-23062398[-]	#N/A	Polynucleotidyl transferase, ribonuclease H-like superfamily protein	Chr3:23061605-23061804[-]	200	0.0527642	0.0581209	0.0932604	0.743506	1.67982	No	Sense	#N/A	#N/A	#N/A	#N/A	#N/A	AT3G62310	1073	873
AT3G57490	Chr3:21279666-21280948[-]	#N/A	Ribosomal protein S5 family protein	Chr3:21279436-21279645[-]	210	0.0251258	0.0830299	0.0444097	0.252893	0.799913	No	Sense	#N/A	#N/A	#N/A	#N/A	#N/A	AT3G57480	311	81
AT3G01510	Chr3:198679-201742[-]	LSF1	like SEX4 1	Chr3:198179-198648[-]	470	0.0336793	0.370985	0.248033	0.327685	1.06105	Yes	Sense	#N/A	#N/A	#N/A	#N/A	#N/A	AT3G01500	659	159
AT4G14440	Chr4:8306745-8307753[-]	ATECI3, ECI3, HCD1	3-hydroxyacyl-CoA dehydratase 1	Chr4:8306255-8306744[-]	490	0.0323046	0.142337	0.0951636	0.37934	1.01775	No	Sense	#N/A	#N/A	#N/A	#N/A	#N/A	AT4G14430	1039	549
AT2G47950	Chr2:19624210-19624809[+]	#N/A	unknown protein; FUNCTIONS IN: molecular_function unknown; INVOLVED IN: biological_process unknown; LOCATED IN: endomembrane system; EXPRESSED IN: root, flower; EXPRESSED DURING: petal differentiation and expansion stage; BEST Arabidopsis thaliana protein match is: unknown protein (TAIR:AT3G62990.1); Has 22 Blast hits to 22 proteins in 5 species: Archae - 0; Bacteria - 0; Metazoa - 0; Fungi - 0; …	Chr2:19624820-19625019[+]	200	0.0263821	0.0581209	0.139891	0.531076	0.813662	No	Sense	#N/A	#N/A	#N/A	#N/A	#N/A	AT2G47960	804	594
AT2G32235	Chr2:13682557-13685500[-]	#N/A	unknown protein; Has 38 Blast hits to 38 proteins in 14 species: Archae - 0; Bacteria - 4; Metazoa - 11; Fungi - 11; Plants - 11; Viruses - 0; Other Eukaryotes - 1 (source: NCBI BLink).	Chr2:13682237-13682556[-]	320	0.0494664	0.108977	0.0728597	0.331922	1.50921	No	Sense	#N/A	#N/A	#N/A	#N/A	#N/A	AT2G32230	320	0
AT3G15530	Chr3:5252875-5254562[-]	#N/A	S-adenosyl-L-methionine-dependent methyltransferases superfamily protein	Chr3:5252507-5252764[-]	258	0.0409025	0.0225275	0.0361474	0.823373	1.24114	No	Sense	#N/A	#N/A	#N/A	#N/A	#N/A	AT3G15520	368	0
AT4G35910	Chr4:17008567-17011509[-]	#N/A	Adenine nucleotide alpha hydrolases-like superfamily protein	Chr4:17008155-17008496[-]	342	0.0154281	0.101967	0.0818073	0.217399	0.460476	No	Sense	#N/A	#N/A	#N/A	#N/A	#N/A	AT4G35905	412	0
AT1G63880	Chr1:23712276-23716124[-]	#N/A	Disease resistance protein (TIR-NBS-LRR class) family	Chr1:23712056-23712275[-]	220	0.0479674	0.0264186	0.148369	0.869033	1.4078	No	Sense	#N/A	#N/A	#N/A	#N/A	#N/A	AT1G63870	374	154
AT5G02240	Chr5:451423-453157[+]	#N/A	NAD(P)-binding Rossmann-fold superfamily protein	Chr5:453168-453507[+]	340	0.0775944	1.09404	1.50862	0.718514	2.26961	No	Sense	#N/A	#N/A	#N/A	#N/A	#N/A	AT5G02244	656	306
AT5G01520	Chr5:206432-208611[+]	#N/A	RING/U-box superfamily protein	Chr5:208612-208936[+]	325	1.15269	5.40077	18.236	3.12109	33.3056	No	Sense	#N/A	#N/A	#N/A	#N/A	#N/A	AT5G01530	325	0
AT1G12770	Chr1:4351064-4353685[+]	ISE1, EMB1586	P-loop containing nucleoside triphosphate hydrolases superfamily protein	Chr1:4353686-4353905[+]	220	0.0719512	0.105674	0.0423911	0.627635	2.07591	No	Sense	#N/A	#N/A	#N/A	#N/A	#N/A	AT1G12775	220	0
AT5G01720	Chr5:266723-270483[-]	#N/A	RNI-like superfamily protein	Chr5:266303-266712[-]	410	0.0386079	0.113407	0.102359	0.479263	1.1139	No	Sense	#N/A	#N/A	#N/A	#N/A	#N/A	AT5G01710	1089	669
AT5G07290	Chr5:2293353-2298976[+]	AML4, ML4	MEI2-like 4	Chr5:2298987-2299276[+]	290	0.0363891	0.0200417	0.144714	0.476137	1.04989	No	Sense	#N/A	#N/A	#N/A	#N/A	#N/A	AT5G07300	910	610
AT3G57080	Chr3:21125857-21127636[+]	RPB5B, NRPE5	Eukaryotic rpb5 RNA polymerase subunit family protein	Chr3:21127647-21128136[+]	490	0.241836	0.145302	0.0582877	2.97624	6.81332	No	Sense	#N/A	#N/A	#N/A	#N/A	#N/A	AT3G57090	893	403
AT2G21190	Chr2:9080865-9082904[+]	#N/A	ER lumen protein retaining receptor family protein	Chr2:9082915-9083164[+]	250	0.0422113	0.0697451	0.0559562	0.552319	1.17587	No	Sense	#N/A	#N/A	#N/A	#N/A	#N/A	AT2G21195	260	0
AT3G29230	Chr3:11188803-11190605[+]	#N/A	Tetratricopeptide repeat (TPR)-like superfamily protein	Chr3:11190786-11191490[+]	705	0.0310378	0.102566	0.123433	0.468596	0.849172	No	Sense	#N/A	#N/A	#N/A	#N/A	#N/A	AT3G29240	885	365
AT4G25830	Chr4:13133529-13135024[+]	#N/A	Uncharacterised protein family (UPF0497)	Chr4:13135025-13135454[+]	430	0.0368122	0.027033	0.0325327	0.531076	1.00105	No	Sense	#N/A	#N/A	#N/A	#N/A	#N/A	AT4G25835	1082	652
AT1G08640	Chr1:2748398-2751278[-]	CJD1	Chloroplast J-like domain 1	Chr1:2748118-2748387[-]	270	0.0390846	0.0430525	0.0172704	0.118017	1.04989	No	Sense	#N/A	#N/A	#N/A	#N/A	#N/A	AT1G08630	430	150
AT3G61430	Chr3:22733309-22735335[+]	PIP1A, ATPIP1, PIP1, PIP1;1	plasma membrane intrinsic protein 1A	Chr3:22735376-22735662[+]	287	0.0367695	0.0202512	0.0162475	0.0740175	0.987697	No	Sense	#N/A	#N/A	#N/A	#N/A	#N/A	AT3G61440	327	0
AT3G10480	Chr3:3264348-3267090[+]	ANAC050, NAC050	NAC domain containing protein 50	Chr3:3267091-3267650[+]	560	0.0376887	0.217953	0.15821	0.749196	1.00302	No	Sense	#N/A	#N/A	#N/A	#N/A	#N/A	AT3G10490	744	184
AT1G76970	Chr1:28922666-28925404[-]	#N/A	Target of Myb protein 1	Chr1:28922293-28922655[-]	363	0.0436068	0.0160113	0.0770747	0.83392	1.1569	No	Sense	#N/A	#N/A	#N/A	#N/A	#N/A	AT1G76965	373	0
AT2G30990	Chr2:13187583-13190419[-]	#N/A	Protein of unknown function (DUF688)	Chr2:13187254-13187482[-]	229	0.0230411	0.0761409	0.0203625	0.579777	0.596005	No	Sense	#N/A	#N/A	#N/A	#N/A	#N/A	AT2G30984	329	0
AT1G11120	Chr1:3715184-3717320[+]	#N/A	unknown protein; BEST Arabidopsis thaliana protein match is: unknown protein (TAIR:AT1G09812.1); Has 270 Blast hits to 255 proteins in 62 species: Archae - 0; Bacteria - 2; Metazoa - 93; Fungi - 14; Plants - 126; Viruses - 0; Other Eukaryotes - 35 (source: NCBI BLink).	Chr1:3717571-3717820[+]	250	0.0211057	0.0232484	0	0.21243	0.545941	No	Sense	#N/A	#N/A	#N/A	#N/A	#N/A	AT1G11125	1462	962
AT2G40950	Chr2:17087620-17090424[-]	BZIP17	Basic-leucine zipper (bZIP) transcription factor family protein	Chr2:17087298-17087609[-]	312	0.0507348	0.0558855	0.0298911	0.527671	1.29553	No	Sense	#N/A	#N/A	#N/A	#N/A	#N/A	AT2G40940	322	0
AT4G13850	Chr4:8020951-8022260[+]	ATGRP2, GR-RBP2, GRP2	glycine-rich RNA-binding protein 2	Chr4:8022311-8022600[+]	290	0.0363891	0.12025	0.0643175	0.329633	0.923175	No	Sense	#N/A	#N/A	#N/A	#N/A	#N/A	AT4G13860	340	0
AT1G19740	Chr1:6824322-6825459[+]	#N/A	ATP-dependent protease La (LON) domain protein	Chr1:6825750-6826229[+]	480	0.0219851	0.0484341	0.00971462	0.24341	0.546816	No	Sense	#N/A	#N/A	#N/A	#N/A	#N/A	AT1G19750	1537	767
AT5G53460	Chr5:21700202-21710066[+]	GLT1	NADH-dependent glutamate synthase 1	Chr5:21710097-21710350[+]	254	0.12464	0.297469	0.165225	2.02812	3.03806	No	Sense	#N/A	#N/A	#N/A	#N/A	#N/A	AT5G53470	284	0
AT5G27930	Chr5:9958090-9961264[-]	#N/A	Protein phosphatase 2C family protein	Chr5:9957641-9958029[-]	389	0.0678203	0.194234	0.143846	0.395918	1.63286	No	Sense	#N/A	#N/A	#N/A	#N/A	#N/A	AT5G27927	449	0
AT5G24430	Chr5:8339144-8343102[-]	#N/A	Calcium-dependent protein kinase (CDPK) family protein	Chr5:8338524-8339123[-]	600	0.0527642	0.0678077	0.0310868	1.15066	1.25986	No	Sense	#N/A	#N/A	#N/A	#N/A	#N/A	AT5G24420	1135	515
AT2G36000	Chr2:15117075-15118697[+]	#N/A	Mitochondrial transcription termination factor family protein	Chr2:15118798-15119117[+]	320	0.0164888	0.0726511	0.0145719	0.282134	0.393707	No	Sense	#N/A	#N/A	#N/A	#N/A	#N/A	AT2G36010	844	424
AT1G45160	Chr1:17083546-17090545[-]	#N/A	Protein kinase superfamily protein	Chr1:17082896-17083515[-]	620	0.119145	0.206236	0.210588	1.5504	2.83639	No	Sense	#N/A	#N/A	#N/A	#N/A	#N/A	AT1G45150	1042	392
AT4G22250	Chr4:11767513-11768452[-]	#N/A	RING/U-box superfamily protein	Chr4:11767305-11767512[-]	208	0.0507348	0.223542	0.0896734	0.689377	1.18617	No	Sense	#N/A	#N/A	#N/A	#N/A	#N/A	AT4G22240	208	0
AT1G10060	Chr1:3284239-3287107[+]	ATBCAT-1, BCAT-1	branched-chain amino acid transaminase 1	Chr1:3287188-3287797[+]	610	0.0259496	0.0381121	0.0382215	0.235066	0.593788	No	Sense	#N/A	#N/A	#N/A	#N/A	#N/A	AT1G10070	979	289
AT5G10745	Chr5:3396475-3398063[+]	#N/A	unknown protein; FUNCTIONS IN: molecular_function unknown; INVOLVED IN: biological_process unknown; LOCATED IN: endomembrane system; BEST Arabidopsis thaliana protein match is: unknown protein (TAIR:AT5G24980.1); Has 35333 Blast hits to 34131 proteins in 2444 species: Archae - 798; Bacteria - 22429; Metazoa - 974; Fungi - 991; Plants - 531; Viruses - 0; Other Eukaryotes - 9610 (source: NCBI BLink…	Chr5:3398184-3398613[+]	430	0.0257386	0.0141758	0.0454929	0.531076	0.58896	No	Sense	#N/A	#N/A	#N/A	#N/A	#N/A	AT5G10750	887	357
AT1G67690	Chr1:25369086-25373730[+]	#N/A	Zincin-like metalloproteases family protein	Chr1:25373961-25374221[+]	261	0.0202162	0.200417	0.0714639	0.26452	0.462593	No	Sense	#N/A	#N/A	#N/A	#N/A	#N/A	AT1G67700	491	0
AT1G28150	Chr1:9834943-9835904[-]	#N/A	unknown protein; FUNCTIONS IN: molecular_function unknown; INVOLVED IN: biological_process unknown; LOCATED IN: plastoglobule; EXPRESSED IN: 22 plant structures; EXPRESSED DURING: 13 growth stages; Has 96 Blast hits to 96 proteins in 44 species: Archae - 0; Bacteria - 56; Metazoa - 0; Fungi - 0; Plants - 40; Viruses - 0; Other Eukaryotes - 0 (source: NCBI BLink).	Chr1:9834683-9834932[-]	250	0.0422113	0.162739	0.111912	0.382374	0.944897	No	Sense	#N/A	#N/A	#N/A	#N/A	#N/A	AT1G28140	515	255
AT5G36925	Chr5:14565813-14566244[-]	#N/A	unknown protein; BEST Arabidopsis thaliana protein match is: unknown protein (TAIR:AT5G36920.1); Has 9 Blast hits to 9 proteins in 2 species: Archae - 0; Bacteria - 0; Metazoa - 0; Fungi - 0; Plants - 9; Viruses - 0; Other Eukaryotes - 0 (source: NCBI BLink).	Chr5:14565323-14565762[-]	440	0.0363891	0.100208	0.0643175	0.879022	0.814567	No	Sense	#N/A	#N/A	#N/A	#N/A	#N/A	AT5G36920	841	501
AT3G51420	Chr3:19084035-19085858[+]	SSL4, ATSSL4	strictosidine synthase-like 4	Chr3:19085889-19086451[+]	563	0.215555	0.443908	0.140802	2.75442	4.76458	No	Sense	#N/A	#N/A	#N/A	#N/A	#N/A	AT3G51430	593	0
AT5G01410	Chr5:172318-173614[-]	PDX1, ATPDX1.3, RSR4, PDX1.3, ATPDX1	Aldolase-type TIM barrel family protein	Chr5:171388-172307[-]	920	0.0458819	0.113715	0.0253425	0.456032	1.00994	No	Sense	#N/A	#N/A	#N/A	#N/A	#N/A	AT5G01400	1245	315
AT4G20380	Chr4:11004517-11006788[+]	LSD1	LSD1 zinc finger family protein	Chr4:11006789-11007034[+]	246	0.171591	0.283517	0.303286	3.23827	3.75569	No	Sense	#N/A	#N/A	#N/A	#N/A	#N/A	AT4G20390	246	0
AT1G73060	Chr1:27478970-27481448[+]	LPA3	Low PSII Accumulation 3	Chr1:27481489-27481784[+]	296	0.160432	0.530157	0.315069	2.4939	3.51144	No	Sense	#N/A	#N/A	#N/A	#N/A	#N/A	AT1G73066	336	0
AT5G04240	Chr5:1169544-1174878[+]	ELF6	Zinc finger (C2H2 type) family protein / transcription factor jumonji (jmj) family protein	Chr5:1174899-1175108[+]	210	0.0251258	0.24909	0.0888194	0.303472	0.54994	No	Sense	#N/A	#N/A	#N/A	#N/A	#N/A	AT5G04250	1126	896
AT2G18240	Chr2:7935285-7936721[+]	#N/A	Rer1 family protein	Chr2:7936732-7937191[+]	460	0.0458819	0.214795	0.091233	0.427169	0.992827	No	Sense	#N/A	#N/A	#N/A	#N/A	#N/A	AT2G18245	560	90
AT5G18770	Chr5:6261352-6263436[+]	#N/A	F-box/FBD-like domains containing protein	Chr5:6263497-6263996[+]	500	0.0422113	0.13949	0.0652823	0.520454	0.913401	No	Sense	#N/A	#N/A	#N/A	#N/A	#N/A	AT5G18780	833	273
AT5G13440	Chr5:4308129-4310181[-]	#N/A	Ubiquinol-cytochrome C reductase iron-sulfur subunit	Chr5:4307799-4308118[-]	320	0.0494664	0.0726511	0.0582877	0.481287	1.06629	No	Sense	#N/A	#N/A	#N/A	#N/A	#N/A	AT5G13430	615	285
AT1G09160	Chr1:2952771-2955689[-]	#N/A	Protein phosphatase 2C family protein	Chr1:2952551-2952770[-]	220	0.0479674	0.0528372	0.0211955	0.531076	1.02602	No	Sense	#N/A	#N/A	#N/A	#N/A	#N/A	AT1G09157	374	154
AT2G43090	Chr2:17918927-17920429[+]	#N/A	Aconitase/3-isopropylmalate dehydratase protein	Chr2:17920460-17920659[+]	200	0.0527642	0.0581209	0.0233151	0.504522	1.10238	No	Sense	#N/A	#N/A	#N/A	#N/A	#N/A	AT2G43100	230	0
AT5G51050	Chr5:20753381-20755714[+]	#N/A	Mitochondrial substrate carrier family protein	Chr5:20755815-20756054[+]	240	0.0219851	0.266388	0.0582877	0.376179	0.459325	No	Sense	#N/A	#N/A	#N/A	#N/A	#N/A	AT5G51055	615	275
AT5G01800	Chr5:306968-308908[+]	#N/A	saposin B domain-containing protein	Chr5:308949-309278[+]	330	0.159891	0.193736	0.353259	1.67369	3.32464	No	Sense	#N/A	#N/A	#N/A	#N/A	#N/A	AT5G01810	525	155
AT1G15120	Chr1:5202648-5204193[+]	#N/A	Ubiquinol-cytochrome C reductase hinge protein	Chr1:5204194-5204624[+]	431	0.0612113	0.0269703	0.0432763	0.739316	1.2545	No	Sense	#N/A	#N/A	#N/A	#N/A	#N/A	AT1G15125	431	0
AT5G66250	Chr5:26468533-26470556[+]	#N/A	kinectin-related	Chr5:26470557-26470766[+]	210	0.0502516	0.0553533	0	0.531076	1.02489	No	Sense	#N/A	#N/A	#N/A	#N/A	#N/A	AT5G66260	712	502
AT4G35490	Chr4:16855902-16856674[+]	MRPL11	mitochondrial ribosomal protein L11	Chr4:16856685-16857298[+]	614	0.0343741	0.113591	0.0227835	0.475719	0.701064	No	Sense	#N/A	#N/A	#N/A	#N/A	#N/A	AT4G35500	624	0
AT5G02740	Chr5:616432-618618[+]	#N/A	Ribosomal protein S24e family protein	Chr5:618689-619188[+]	500	0.0211057	0.0464967	0.0746083	0.180566	0.430453	No	Sense	#N/A	#N/A	#N/A	#N/A	#N/A	AT5G02750	1475	905
AT3G14180	Chr3:4707113-4708848[-]	#N/A	sequence-specific DNA binding transcription factors	Chr3:4706433-4707102[-]	670	0.0551268	0.355665	0.229671	0.49937	1.1204	No	Sense	#N/A	#N/A	#N/A	#N/A	#N/A	AT3G14172	1483	803
AT5G64180	Chr5:25677080-25678357[+]	#N/A	unknown protein; Has 1807 Blast hits to 1807 proteins in 277 species: Archae - 0; Bacteria - 0; Metazoa - 736; Fungi - 347; Plants - 385; Viruses - 0; Other Eukaryotes - 339 (source: NCBI BLink).	Chr5:25678508-25678717[+]	210	0.100503	0.221413	0.377482	0.632233	2.02478	No	Sense	#N/A	#N/A	#N/A	#N/A	#N/A	AT5G64190	1074	714
AT5G13880	Chr5:4477354-4478109[-]	#N/A	unknown protein; BEST Arabidopsis thaliana protein match is: unknown protein (TAIR:AT5G47920.1); Has 30201 Blast hits to 17322 proteins in 780 species: Archae - 12; Bacteria - 1396; Metazoa - 17338; Fungi - 3422; Plants - 5037; Viruses - 0; Other Eukaryotes - 2996 (source: NCBI BLink).	Chr5:4477046-4477313[-]	268	0.0787525	0.173495	0.226191	0.31706	1.56699	No	Sense	#N/A	#N/A	#N/A	#N/A	#N/A	AT5G13870	308	0
AT2G25350	Chr2:10797599-10800756[+]	#N/A	Phox (PX) domain-containing protein	Chr2:10801027-10801277[+]	251	0.0210216	0.115779	0.130044	0.169267	0.418281	No	Sense	#N/A	#N/A	#N/A	#N/A	#N/A	AT2G25355	521	0
AT5G16050	Chr5:5243745-5245820[-]	GRF5, GF14 UPSILON	general regulatory factor 5	Chr5:5243330-5243734[-]	405	0.0911973	0.129158	0.149677	0.35405	1.80166	Yes	Sense	#N/A	#N/A	#N/A	#N/A	#N/A	AT5G16040	415	0
AT3G03160	Chr3:729768-730467[+]	#N/A	FUNCTIONS IN: molecular_function unknown; INVOLVED IN: intracellular protein transport; LOCATED IN: endomembrane system, integral to membrane, endoplasmic reticulum; EXPRESSED IN: 23 plant structures; EXPRESSED DURING: 15 growth stages; CONTAINS InterPro DOMAIN/s: B-cell receptor-associated 31-like (InterPro:IPR008417); BEST Arabidopsis thaliana protein match is: unknown protein (TAIR:AT5G17190.1…	Chr3:730498-731007[+]	510	0.0517296	0.113963	0.155434	0.239505	1.01901	No	Sense	#N/A	#N/A	#N/A	#N/A	#N/A	AT3G03170	1423	883
AT2G47350	Chr2:19433791-19437249[+]	#N/A	HIT zinc finger ;PAPA-1-like conserved region	Chr2:19437270-19437629[+]	360	0.0439701	0.0484341	0.103623	0.383555	0.860323	No	Sense	#N/A	#N/A	#N/A	#N/A	#N/A	AT2G47360	550	170
AT2G47485	Chr2:19485875-19486553[+]	#N/A	unknown protein; BEST Arabidopsis thaliana protein match is: unknown protein (TAIR:AT3G62650.1); Has 35333 Blast hits to 34131 proteins in 2444 species: Archae - 798; Bacteria - 22429; Metazoa - 974; Fungi - 991; Plants - 531; Viruses - 0; Other Eukaryotes - 9610 (source: NCBI BLink).	Chr2:19486554-19487245[+]	692	0.0991235	0.151182	0.498646	0.107443	1.92681	No	Sense	#N/A	#N/A	#N/A	#N/A	#N/A	AT2G47490	692	0
AT5G24980	Chr5:8609081-8609528[+]	#N/A	unknown protein; FUNCTIONS IN: molecular_function unknown; INVOLVED IN: biological_process unknown; LOCATED IN: endomembrane system; BEST Arabidopsis thaliana protein match is: unknown protein (TAIR:AT5G10745.1); Has 32 Blast hits to 32 proteins in 10 species: Archae - 0; Bacteria - 0; Metazoa - 0; Fungi - 0; Plants - 32; Viruses - 0; Other Eukaryotes - 0 (source: NCBI BLink).	Chr5:8609779-8610288[+]	510	0.0310378	0.216529	0.0822886	0.374877	0.586701	No	Sense	#N/A	#N/A	#N/A	#N/A	#N/A	AT5G24990	1008	248
AT5G65880	Chr5:26352995-26353761[+]	#N/A	unknown protein; FUNCTIONS IN: molecular_function unknown; INVOLVED IN: biological_process unknown; LOCATED IN: endomembrane system; EXPRESSED IN: 21 plant structures; EXPRESSED DURING: 13 growth stages; Has 1807 Blast hits to 1807 proteins in 277 species: Archae - 0; Bacteria - 0; Metazoa - 736; Fungi - 347; Plants - 385; Viruses - 0; Other Eukaryotes - 339 (source: NCBI BLink).	Chr5:26353852-26354141[+]	290	0.0181945	0	0	0.238068	0.343928	No	Sense	#N/A	#N/A	#N/A	#N/A	#N/A	AT5G65890	1091	711
AT2G27260	Chr2:11669655-11670644[+]	#N/A	Late embryogenesis abundant (LEA) hydroxyproline-rich glycoprotein family	Chr2:11670685-11672024[+]	1340	0.122066	0.147471	0.100916	1.91821	2.29173	No	Sense	#N/A	#N/A	#N/A	#N/A	#N/A	AT2G27270	1626	246
AT1G06230	Chr1:1906963-1910848[+]	GTE4	global transcription factor group E4	Chr1:1910869-1911121[+]	253	0.0834216	0.114863	0.129016	0.797663	1.53541	No	Sense	#N/A	#N/A	#N/A	#N/A	#N/A	AT1G06240	273	0
AT5G56010	Chr5:22681305-22684129[+]	HSP81-3, Hsp81.3, AtHsp90-3, AtHsp90.3	heat shock protein 81-3	Chr5:22684150-22684359[+]	210	0.0502516	0.110707	0.133229	0.126447	0.924899	No	Sense	#N/A	#N/A	#N/A	#N/A	#N/A	AT5G56020	275	45
AT3G59060	Chr3:21827978-21830507[-]	PIL6, PIF5	phytochrome interacting factor 3-like 6	Chr3:21827510-21827957[-]	448	0.082444	0.103787	0.0832682	0.450466	1.4764	No	Sense	#N/A	#N/A	#N/A	#N/A	#N/A	AT3G59050	468	0
AT5G11280	Chr5:3597247-3598521[+]	#N/A	unknown protein; BEST Arabidopsis thaliana protein match is: unknown protein (TAIR:AT1G80200.1); Has 30201 Blast hits to 17322 proteins in 780 species: Archae - 12; Bacteria - 1396; Metazoa - 17338; Fungi - 3422; Plants - 5037; Viruses - 0; Other Eukaryotes - 2996 (source: NCBI BLink).	Chr5:3598572-3599000[+]	429	0.0614967	0.108384	0.108695	0.631349	1.10128	No	Sense	#N/A	#N/A	#N/A	#N/A	#N/A	AT5G11290	479	0
AT5G59780	Chr5:24082197-24083431[-]	MYB59, ATMYB59-3	myb domain protein 59	Chr5:24081917-24082126[-]	210	0.0502516	0.110707	0.0444097	0.606944	0.899902	No	Sense	#N/A	#N/A	#N/A	#N/A	#N/A	AT5G59770	980	700
AT2G37300	Chr2:15662567-15664599[-]	#N/A	unknown protein; FUNCTIONS IN: molecular_function unknown; INVOLVED IN: biological_process unknown; LOCATED IN: endomembrane system; EXPRESSED IN: 23 plant structures; EXPRESSED DURING: 12 growth stages.	Chr2:15662327-15662536[-]	210	0.0502516	0.16606	0.421892	0.632233	0.899902	No	Sense	#N/A	#N/A	#N/A	#N/A	#N/A	AT2G37290	881	641
AT4G31980	Chr4:15464905-15469204[+]	#N/A	unknown protein; CONTAINS InterPro DOMAIN/s: Protein of unknown function DUF247, plant (InterPro:IPR004158), Protein of unknown function DUF862, eukaryotic (InterPro:IPR008580); BEST Arabidopsis thaliana protein match is: Plant protein of unknown function (DUF247) (TAIR:AT5G11290.1); Has 1967 Blast hits to 1844 proteins in 183 species: Archae - 0; Bacteria - 6; Metazoa - 223; Fungi - 83; Plants -…	Chr4:15469235-15469454[+]	220	0.0239837	0.132093	0.0847822	0.362097	0.429499	No	Sense	#N/A	#N/A	#N/A	#N/A	#N/A	AT4G31985	690	440
AT3G14690	Chr3:4937317-4939465[+]	CYP72A15	cytochrome P450, family 72, subfamily A, polypeptide 15	Chr3:4939506-4939905[+]	400	0.0527642	0.101712	0.151548	0.916105	0.931774	No	Sense	#N/A	#N/A	#N/A	#N/A	#N/A	AT3G14700	852	412
AT1G27730	Chr1:9648141-9649073[-]	STZ, ZAT10	salt tolerance zinc finger	Chr1:9647711-9648130[-]	420	0.0502516	0.0276766	0.0333073	0.328761	0.887403	No	Sense	#N/A	#N/A	#N/A	#N/A	#N/A	AT1G27720	764	334
AT3G05030	Chr3:1393296-1397358[-]	NHX2, ATNHX2	sodium hydrogen exchanger 2	Chr3:1393026-1393285[-]	260	0.0608817	0.178834	0.376628	0.10213	1.07008	No	Sense	#N/A	#N/A	#N/A	#N/A	#N/A	AT3G05020	341	71
AT2G26900	Chr2:11474952-11477944[-]	#N/A	Sodium Bile acid symporter family	Chr2:11474642-11474941[-]	300	0.0527642	0.0387473	0.0310868	0.265538	0.927399	No	Sense	#N/A	#N/A	#N/A	#N/A	#N/A	AT2G26890	626	316
AT4G24972	Chr4:12837353-12839823[+]	TPD1	tapetum determinant 1	Chr4:12840014-12840213[+]	200	0.211057	0.406846	0.139891	2.23052	3.6746	No	Sense	#N/A	#N/A	#N/A	#N/A	#N/A	AT4G24973	1146	756
AT3G55200	Chr3:20460533-20464556[+]	#N/A	Cleavage and polyadenylation specificity factor (CPSF) A subunit protein	Chr3:20464567-20464816[+]	250	0.063317	0.116242	0.0746083	0.361131	1.09188	No	Sense	#N/A	#N/A	#N/A	#N/A	#N/A	AT3G55210	658	398
AT2G40240	Chr2:16811026-16812228[+]	#N/A	Tetratricopeptide repeat (TPR)-like superfamily protein	Chr2:16812399-16812608[+]	210	0.0251258	0.16606	0.155434	0.328761	0.424954	No	Sense	#N/A	#N/A	#N/A	#N/A	#N/A	AT2G40250	1101	721
AT2G37250	Chr2:15641906-15643786[+]	ADK, ATPADK1	adenosine kinase	Chr2:15644067-15644296[+]	230	0.0229409	0.10108	0.10137	0.300173	0.388001	No	Sense	#N/A	#N/A	#N/A	#N/A	#N/A	AT2G37260	1053	543
AT5G26740	Chr5:9291928-9294687[+]	#N/A	Protein of unknown function (DUF300)	Chr5:9294748-9295067[+]	320	0.0164888	0	0.0145719	0.165961	0.278876	No	Sense	#N/A	#N/A	#N/A	#N/A	#N/A	AT5G26731	886	506
AT1G06550	Chr1:2003627-2007190[-]	#N/A	ATP-dependent caseinolytic (Clp) protease/crotonase family protein	Chr1:2003394-2003626[-]	233	0.113228	0.249446	0.500324	1.16244	1.8925	No	Sense	#N/A	#N/A	#N/A	#N/A	#N/A	AT1G06540	233	0
AT3G29200	Chr3:11164393-11166416[-]	CM1, ATCM1	chorismate mutase 1	Chr3:11163793-11164262[-]	470	0.0449057	0.148394	0.158741	0.372883	0.737154	No	Sense	#N/A	#N/A	#N/A	#N/A	#N/A	AT3G29195	668	68
AT5G16680	Chr5:5467373-5473506[-]	#N/A	RING/FYVE/PHD zinc finger superfamily protein	Chr5:5467064-5467342[-]	279	0.132383	0.270814	0.20056	1.27534	2.16374	No	Sense	#N/A	#N/A	#N/A	#N/A	#N/A	AT5G16660	309	0
AT3G06510	Chr3:2016330-2019778[+]	SFR2	Glycosyl hydrolase superfamily protein	Chr3:2019809-2020283[+]	475	0.244381	0.783103	0.834435	1.96777	3.8901	No	Sense	#N/A	#N/A	#N/A	#N/A	#N/A	AT3G06520	505	0
AT5G17980	Chr5:5953596-5956745[+]	#N/A	C2 calcium/lipid-binding plant phosphoribosyltransferase family protein	Chr5:5956836-5957055[+]	220	0.0239837	0.158512	0.0423911	0.241398	0.381777	No	Sense	#N/A	#N/A	#N/A	#N/A	#N/A	AT5G17990	467	157
AT4G01600	Chr4:693181-694340[+]	#N/A	GRAM domain family protein	Chr4:694391-694620[+]	230	0.0229409	0.02527	0.081096	0.0692707	0.365178	No	Sense	#N/A	#N/A	#N/A	#N/A	#N/A	AT4G01610	354	74
AT2G02060	Chr2:495570-497747[+]	#N/A	Homeodomain-like superfamily protein	Chr2:497788-498024[+]	237	0.178107	0.95642	1.25921	1.54617	2.81299	No	Sense	#N/A	#N/A	#N/A	#N/A	#N/A	AT2G02061	277	0
AT5G19860	Chr5:6714264-6715875[-]	#N/A	Protein of unknown function, DUF538	Chr5:6713637-6714223[-]	587	0.143821	0.198027	0.293921	1.339	2.22676	No	Sense	#N/A	#N/A	#N/A	#N/A	#N/A	AT5G19855	627	0
AT5G62220	Chr5:24988456-24990009[-]	ATGT18, GT18	glycosyltransferase 18	Chr5:24987490-24988285[-]	796	0.079544	0.0730162	0.0702968	0.233513	1.22003	No	Sense	#N/A	#N/A	#N/A	#N/A	#N/A	AT5G62210	966	0
AT5G04740	Chr5:1368542-1371480[-]	#N/A	ACT domain-containing protein	Chr5:1368142-1368541[-]	400	0.0659552	0.116242	0.268124	0.889552	1.01052	No	Sense	#N/A	#N/A	#N/A	#N/A	#N/A	AT5G04730	1147	747
AT2G13360	Chr2:5539240-5541358[-]	AGT, AGT1, SGAT	alanine:glyoxylate aminotransferase	Chr2:5538670-5539169[-]	500	0.274374	0.232484	0.0746083	1.71006	4.16805	No	Sense	#N/A	#N/A	#N/A	#N/A	#N/A	AT2G13350	1358	788
AT3G45640	Chr3:16756770-16758698[+]	ATMPK3, MPK3, ATMAPK3	mitogen-activated protein kinase 3	Chr3:16758699-16759252[+]	554	0.190484	0.136385	0.126255	1.64883	2.89003	No	Sense	#N/A	#N/A	#N/A	#N/A	#N/A	AT3G45650	554	0
AT4G38680	Chr4:18071884-18073182[-]	GRP2, CSDP2, CSP2, ATCSP2	glycine rich protein 2	Chr4:18071356-18071753[-]	398	0.0530293	0.146032	0.093729	0.360277	0.804561	No	Sense	#N/A	#N/A	#N/A	#N/A	#N/A	AT4G38670	528	0
AT2G47890	Chr2:19607996-19609645[+]	#N/A	B-box type zinc finger protein with CCT domain	Chr2:19609646-19610472[+]	827	0.261588	0.885518	0.941625	3.11453	3.96088	No	Sense	#N/A	#N/A	#N/A	#N/A	#N/A	AT2G47895	827	0
AT4G40040	Chr4:18557187-18558743[-]	#N/A	Histone superfamily protein	Chr4:18556973-18557176[-]	204	0.129324	0.0569813	0.0685738	1.48389	1.95567	No	Sense	#N/A	#N/A	#N/A	#N/A	#N/A	AT4G40030	214	0
AT1G78170	Chr1:29414059-29415094[+]	#N/A	unknown protein; BEST Arabidopsis thaliana protein match is: unknown protein (TAIR:AT1G22250.1); Has 66 Blast hits to 66 proteins in 11 species: Archae - 0; Bacteria - 0; Metazoa - 0; Fungi - 0; Plants - 66; Viruses - 0; Other Eukaryotes - 0 (source: NCBI BLink).	Chr1:29415135-29415529[+]	395	0.106864	0.35314	0.247907	0.363014	1.60805	No	Sense	#N/A	#N/A	#N/A	#N/A	#N/A	AT1G78172	435	0
AT1G73470	Chr1:27625149-27627714[+]	#N/A	unknown protein; FUNCTIONS IN: molecular_function unknown; INVOLVED IN: biological_process unknown; LOCATED IN: chloroplast; EXPRESSED IN: 22 plant structures; EXPRESSED DURING: 13 growth stages.	Chr1:27627945-27628464[+]	520	0.10147	0.469438	0.394563	0.847678	1.51426	No	Sense	#N/A	#N/A	#N/A	#N/A	#N/A	AT1G73480	1224	474
AT2G36350	Chr2:15238093-15241923[+]	#N/A	Protein kinase superfamily protein	Chr2:15241944-15242233[+]	290	0.0727782	0.160334	0.0964762	0.31132	1.08609	No	Sense	#N/A	#N/A	#N/A	#N/A	#N/A	AT2G36355	452	142
AT4G12710	Chr4:7484837-7486801[-]	#N/A	ARM repeat superfamily protein	Chr4:7484507-7484716[-]	210	0.0251258	0.0830299	0.0666146	0.202315	0.374959	No	Sense	#N/A	#N/A	#N/A	#N/A	#N/A	AT4G12700	431	101
AT1G28060	Chr1:9779138-9782700[+]	#N/A	Pre-mRNA-splicing factor 3	Chr1:9782701-9782995[+]	295	0.268292	0.551656	0.284523	2.55636	3.98601	No	Sense	#N/A	#N/A	#N/A	#N/A	#N/A	AT1G28070	295	0
AT2G25620	Chr2:10902943-10905245[-]	AtDBP1, DBP1	DNA-binding protein phosphatase 1	Chr2:10902532-10902932[-]	401	0.776331	1.28997	3.97694	1.33762	11.3629	No	Sense	#N/A	#N/A	#N/A	#N/A	#N/A	AT2G25610	411	0
AT5G19330	Chr5:6507794-6512759[-]	ARIA	ARM repeat protein interacting with ABF2	Chr5:6507474-6507773[-]	300	0.0879403	0.0581209	0	0.513373	1.25986	No	Sense	#N/A	#N/A	#N/A	#N/A	#N/A	AT5G19320	358	38
AT4G27430	Chr4:13718679-13723324[+]	CIP7	COP1-interacting protein 7	Chr4:13723355-13723704[+]	350	0.0904529	0.132848	0.106583	0.546249	1.28986	No	Sense	#N/A	#N/A	#N/A	#N/A	#N/A	AT4G27435	469	89
AT5G58440	Chr5:23623858-23626787[-]	SNX2a	sorting nexin 2A	Chr5:23623445-23623857[-]	413	0.217189	0.140729	0.169359	2.23746	3.05052	No	Sense	#N/A	#N/A	#N/A	#N/A	#N/A	AT5G58430	413	0
AT1G70640	Chr1:26636255-26637127[+]	#N/A	octicosapeptide/Phox/Bem1p (PB1) domain-containing protein	Chr1:26637128-26637877[+]	750	0.140704	0.317728	0.764735	0.665615	1.96679	No	Sense	#N/A	#N/A	#N/A	#N/A	#N/A	AT1G70645	872	122
AT4G27760	Chr4:13844065-13846746[+]	FEY, FEY3	NAD(P)-binding Rossmann-fold superfamily protein	Chr4:13846757-13846970[+]	214	0.123281	0.217274	0.0871592	0.645232	1.7171	No	Sense	#N/A	#N/A	#N/A	#N/A	#N/A	AT4G27765	224	0
AT5G13750	Chr5:4438200-4441579[+]	ZIFL1	zinc induced facilitator-like 1	Chr5:4441580-4442013[+]	434	0.0851035	0.0937434	0.322328	0.660785	1.18535	No	Sense	#N/A	#N/A	#N/A	#N/A	#N/A	AT5G13760	434	0
AT3G55460	Chr3:20560808-20563762[+]	SCL30, At-SCL30	SC35-like splicing factor 30	Chr3:20563773-20563972[+]	200	0.0791463	0.0871814	0	0.238984	1.10238	No	Sense	#N/A	#N/A	#N/A	#N/A	#N/A	AT3G55470	473	263
AT3G06700	Chr3:2117347-2118007[-]	#N/A	Ribosomal L29e protein family	Chr3:2116826-2117296[-]	471	0.324875	0.789753	0.415811	2.54826	4.40239	No	Sense	#N/A	#N/A	#N/A	#N/A	#N/A	AT3G06690	521	0
AT2G17990	Chr2:7826817-7828754[+]	#N/A	BEST Arabidopsis thaliana protein match is: kinectin-related (TAIR:AT5G66250.3); Has 7578 Blast hits to 6129 proteins in 783 species: Archae - 220; Bacteria - 1045; Metazoa - 3605; Fungi - 575; Plants - 442; Viruses - 38; Other Eukaryotes - 1653 (source: NCBI BLink).	Chr2:7828765-7829034[+]	270	0.0977114	0.193736	0.362679	0.432728	1.32208	No	Sense	#N/A	#N/A	#N/A	#N/A	#N/A	AT2G18000	280	0
AT2G45590	Chr2:18786658-18788988[+]	#N/A	Protein kinase superfamily protein	Chr2:18789009-18789358[+]	350	0.0753774	0.149454	0.119906	0.333819	1.01989	No	Sense	#N/A	#N/A	#N/A	#N/A	#N/A	AT2G45600	599	229
AT3G59050	Chr3:21824696-21827509[-]	ATPAO3, PAO3	polyamine oxidase 3	Chr3:21824476-21824695[-]	220	0.0959349	0.0528372	0.0847822	0.362097	1.2885	No	Sense	#N/A	#N/A	#N/A	#N/A	#N/A	AT3G59040	347	127
AT1G71520	Chr1:26938525-26939106[+]	#N/A	Integrase-type DNA-binding superfamily protein	Chr1:26939127-26939466[+]	340	0.0781692	0.17221	0.604465	1.29818	1.04989	No	Sense	#N/A	#N/A	#N/A	#N/A	#N/A	AT1G71530	460	170
AT5G05870	Chr5:1767639-1769262[+]	UGT76C1	UDP-glucosyl transferase 76C1	Chr5:1769283-1769532[+]	250	0.0422113	0.0929935	0.205173	0.48859	0.566938	No	Sense	#N/A	#N/A	#N/A	#N/A	#N/A	AT5G05880	385	115
AT1G65040	Chr1:24159834-24163628[-]	#N/A	RING/U-box superfamily protein	Chr1:24159586-24159833[-]	248	0.0851035	0.304666	0.30084	0.278386	1.12185	No	Sense	#N/A	#N/A	#N/A	#N/A	#N/A	AT1G65032	248	0
AT1G68580	Chr1:25752735-25756076[+]	#N/A	agenet domain-containing protein / bromo-adjacent homology (BAH) domain-containing protein	Chr1:25756087-25756599[+]	513	0.13371	0.215263	0.127256	0.631493	1.72934	No	Sense	#N/A	#N/A	#N/A	#N/A	#N/A	AT1G68585	523	0
AT3G15000	Chr3:5050257-5052432[+]	#N/A	cobalt ion binding	Chr3:5052473-5052730[+]	258	0.0818049	0.157692	0.108442	1.00863	1.05802	No	Sense	#N/A	#N/A	#N/A	#N/A	#N/A	AT3G15010	298	0
AT2G35635	Chr2:14980970-14982116[+]	UBQ7, RUB2	ubiquitin 7	Chr2:14982327-14982616[+]	290	0.0977114	0.408999	0.0863522	1.10149	1.22487	No	Sense	#N/A	#N/A	#N/A	#N/A	#N/A	AT2G35640	718	238
AT3G14570	Chr3:4892643-4902628[+]	ATGSL04, gsl04, atgsl4	glucan synthase-like 4	Chr3:4902789-4902988[+]	200	0.0527642	0.0581209	0.0233151	0.238984	0.656179	No	Sense	#N/A	#N/A	#N/A	#N/A	#N/A	AT3G14580	383	23
AT4G40050	Chr4:18560860-18563838[-]	#N/A	Protein of unknown function (DUF3550/UPF0682)	Chr4:18560658-18560859[-]	202	0.235088	0.431591	0.207758	1.07793	2.88459	No	Sense	#N/A	#N/A	#N/A	#N/A	#N/A	AT4G40045	202	0
AT3G05220	Chr3:1488595-1491320[+]	#N/A	Heavy metal transport/detoxification superfamily protein	Chr3:1491421-1491800[+]	380	0.0416559	0.03059	0.0245422	0.251562	0.511129	No	Sense	#N/A	#N/A	#N/A	#N/A	#N/A	AT3G05230	821	341
AT2G44900	Chr2:18511719-18516408[-]	ARABIDILLO-1, ARABIDILLO1	ARABIDILLO-1	Chr2:18510689-18511338[-]	650	0.0324703	0.0625918	0.00717387	0.326816	0.395726	No	Sense	#N/A	#N/A	#N/A	#N/A	#N/A	AT2G44890	1354	324
AT5G48400	Chr5:19616244-19619246[+]	ATGLR1.2, GLR1.2	Glutamate receptor family protein	Chr5:19619267-19619476[+]	210	0.125629	0.525856	2.44253	0.682811	1.52483	No	Sense	#N/A	#N/A	#N/A	#N/A	#N/A	AT5G48410	1020	790
AT5G28030	Chr5:10030406-10032451[-]	DES1	L-cysteine desulfhydrase 1	Chr5:10029326-10030405[-]	1080	0.415274	0.522012	0.310868	1.97186	4.87516	No	Sense	#N/A	#N/A	#N/A	#N/A	#N/A	AT5G28020	1825	745
AT4G00630	Chr4:261449-268050[-]	KEA2	K+ efflux antiporter 2	Chr4:261020-261368[-]	349	0.045356	0.133228	0.0534443	0.319558	0.526447	No	Sense	#N/A	#N/A	#N/A	#N/A	#N/A	AT4G00620	429	0
AT2G37980	Chr2:15894057-15897610[-]	#N/A	O-fucosyltransferase family protein	Chr2:15893737-15893946[-]	210	0.0502516	0.138383	0.133229	0.556365	0.574937	No	Sense	#N/A	#N/A	#N/A	#N/A	#N/A	AT2G37975	417	97
AT3G13460	Chr3:4384714-4388525[-]	ECT2	evolutionarily conserved C-terminal region 2	Chr3:4384437-4384693[-]	257	0.143716	0.248767	0.0725762	0.971228	1.61364	No	Sense	#N/A	#N/A	#N/A	#N/A	#N/A	AT3G13450	277	0
AT3G04780	Chr3:1311247-1313090[-]	#N/A	Protein of unknown function (DUF1000)	Chr3:1311027-1311236[-]	210	0.100503	0.138383	0.0888194	0.35405	1.12488	No	Sense	#N/A	#N/A	#N/A	#N/A	#N/A	AT3G04770	359	139
AT2G15570	Chr2:6791290-6792933[-]	ATHM3, ATM3, TRX-M3, GAT1	Thioredoxin superfamily protein	Chr2:6791060-6791279[-]	220	0.0959349	0.105674	0.19076	0.506936	1.07375	No	Sense	#N/A	#N/A	#N/A	#N/A	#N/A	AT2G15560	1188	958
AT1G51060	Chr1:18926876-18927646[+]	HTA10	histone H2A 10	Chr1:18927667-18927876[+]	210	0.150755	0.221413	0.155434	0.809258	1.67482	No	Sense	#N/A	#N/A	#N/A	#N/A	#N/A	AT1G51070	230	0
AT3G07760	Chr3:2476367-2478254[+]	#N/A	Sterile alpha motif (SAM) domain-containing protein	Chr3:2478285-2478724[+]	440	0.083943	0.158512	0.0529888	0.434516	0.930581	No	Sense	#N/A	#N/A	#N/A	#N/A	#N/A	AT3G07770	1293	823
AT4G16520	Chr4:9306663-9308462[-]	ATG8F	Ubiquitin-like superfamily protein	Chr4:9306263-9306652[-]	390	0.0947049	0.10432	0.0597823	0.313198	1.03643	No	Sense	#N/A	#N/A	#N/A	#N/A	#N/A	AT4G16515	899	499
AT4G10330	Chr4:6406541-6407777[+]	#N/A	glycine-rich protein	Chr4:6407778-6408015[+]	238	0.133019	0.0488411	0.0783701	0.714051	1.43367	No	Sense	#N/A	#N/A	#N/A	#N/A	#N/A	AT4G10340	238	0
AT4G22610	Chr4:11902105-11902642[-]	#N/A	Bifunctional inhibitor/lipid-transfer protein/seed storage 2S albumin superfamily protein	Chr4:11901685-11901994[-]	310	0.371303	0.904103	0.414491	2.8324	3.98568	No	Sense	#N/A	#N/A	#N/A	#N/A	#N/A	AT4G22600	1072	692
AT3G08620	Chr3:2617768-2620573[+]	#N/A	RNA-binding KH domain-containing protein	Chr3:2620624-2620831[+]	208	0.355144	1.14565	1.30026	2.06813	3.81088	No	Sense	#N/A	#N/A	#N/A	#N/A	#N/A	AT3G08630	258	0
AT5G57020	Chr5:23074867-23076901[+]	NMT1, ATNMT1	myristoyl-CoA:protein N-myristoyltransferase	Chr5:23076912-23077221[+]	310	0.119145	0.299979	0.195546	0.942231	1.27002	No	Sense	#N/A	#N/A	#N/A	#N/A	#N/A	AT5G57030	363	43
AT3G43980	Chr3:15778402-15779311[-]	#N/A	Ribosomal protein S14p/S29e family protein	Chr3:15777949-15778311[-]	363	0.0436068	0.144101	0.0770747	0.263343	0.46276	No	Sense	#N/A	#N/A	#N/A	#N/A	#N/A	AT3G43970	453	0
AT5G38050	Chr5:15187519-15188783[+]	#N/A	RNA polymerase II transcription elongation factor	Chr5:15188834-15189403[+]	570	0.101826	0.15295	0.196338	0.61493	1.07751	No	Sense	#N/A	#N/A	#N/A	#N/A	#N/A	AT5G38060	660	40
AT5G04590	Chr5:1319356-1322526[+]	SIR	sulfite reductase	Chr5:1322867-1323366[+]	500	0.329776	0.278496	0.25258	2.03579	3.48868	No	Sense	#N/A	#N/A	#N/A	#N/A	#N/A	AT5G04600	1109	289
AT1G01510	Chr1:187211-190056[+]	AN	NAD(P)-binding Rossmann-fold superfamily protein	Chr1:190177-190595[+]	419	0.226672	2.0807	0.678864	2.35752	2.36788	No	Sense	#N/A	#N/A	#N/A	#N/A	#N/A	AT1G01520	539	0
AT5G25270	Chr5:8757547-8762757[-]	#N/A	Ubiquitin-like superfamily protein	Chr5:8757257-8757486[-]	230	0.0458819	0.10108	0.040548	0.323263	0.479296	No	Sense	#N/A	#N/A	#N/A	#N/A	#N/A	AT5G25265	598	308
AT3G58840	Chr3:21757312-21758772[-]	#N/A	Tropomyosin-related	Chr3:21756862-21757121[-]	260	0.0405878	0.0447084	0.0538041	0.20426	0.423992	No	Sense	#N/A	#N/A	#N/A	#N/A	#N/A	AT3G58830	670	220
AT4G38760	Chr4:18084908-18096166[-]	#N/A	Protein of unknown function (DUF3414)	Chr4:18084252-18084857[-]	606	0.165432	0.354864	0.223148	1.08669	1.72382	No	Sense	#N/A	#N/A	#N/A	#N/A	#N/A	AT4G38740	656	0
AT5G66200	Chr5:26453460-26455822[-]	ARO2	armadillo repeat only 2	Chr5:26453200-26453429[-]	230	0.160587	0.30324	0.243288	1.10833	1.6433	No	Sense	#N/A	#N/A	#N/A	#N/A	#N/A	AT5G66190	260	0
AT1G55170	Chr1:20580274-20581975[+]	#N/A	unknown protein; BEST Arabidopsis thaliana protein match is: unknown protein (TAIR:AT3G14750.1); Has 13439 Blast hits to 8993 proteins in 828 species: Archae - 344; Bacteria - 1469; Metazoa - 6958; Fungi - 1008; Plants - 683; Viruses - 29; Other Eukaryotes - 2948 (source: NCBI BLink).	Chr1:20581986-20582964[+]	979	0.123961	0.261218	0.161943	0.82455	1.23863	No	Sense	#N/A	#N/A	#N/A	#N/A	#N/A	AT1G55175	989	0
AT1G01140	Chr1:64166-67625[-]	CIPK9, PKS6	CBL-interacting protein kinase 9	Chr1:63812-64135[-]	324	0.765406	0.843112	0.662034	6.67123	7.64732	No	Sense	#N/A	#N/A	#N/A	#N/A	#N/A	AT1G01130	354	0
AT1G56140	Chr1:21001574-21007809[-]	#N/A	Leucine-rich repeat transmembrane protein kinase	Chr1:21001304-21001563[-]	260	0.10147	0.0670626	0.0717387	0.674057	1.00951	No	Sense	#N/A	#N/A	#N/A	#N/A	#N/A	AT1G56130	686	416
AT4G13930	Chr4:8047692-8050106[-]	SHM4	serine hydroxymethyltransferase 4	Chr4:8047177-8047691[-]	515	0.204909	0.64328	0.497992	2.2068	1.99784	No	Sense	#N/A	#N/A	#N/A	#N/A	#N/A	AT4G13918	515	0
AT5G01480	Chr5:192990-194231[+]	#N/A	Cysteine/Histidine-rich C1 domain family protein	Chr5:194232-194891[+]	660	0.103929	0.228961	0.169564	0.627635	1.01012	No	Sense	#N/A	#N/A	#N/A	#N/A	#N/A	AT5G01490	1309	649
AT1G19180	Chr1:6622094-6623620[+]	JAZ1, TIFY10A	jasmonate-zim-domain protein 1	Chr1:6623621-6623875[+]	255	0.165535	0.136755	0.20115	0.791407	1.60571	No	Sense	#N/A	#N/A	#N/A	#N/A	#N/A	AT1G19190	255	0
AT5G20220	Chr5:6821990-6825981[+]	#N/A	zinc knuckle (CCHC-type) family protein	Chr5:6826012-6826221[+]	210	0.100503	0.0830299	0.0666146	0.632233	0.974894	No	Sense	#N/A	#N/A	#N/A	#N/A	#N/A	AT5G20230	524	284
AT2G24500	Chr2:10401035-10402934[-]	FZF	Zinc finger protein 622	Chr2:10400499-10401004[-]	506	0.229409	1.20607	0.580573	2.76033	2.20974	No	Sense	#N/A	#N/A	#N/A	#N/A	#N/A	AT2G24490	536	0
AT3G46980	Chr3:17307003-17309938[-]	PHT4;3	phosphate transporter 4;3	Chr3:17306683-17306942[-]	260	0.121763	0.290605	0.179347	0.674057	1.17103	No	Sense	#N/A	#N/A	#N/A	#N/A	#N/A	AT3G46970	556	236
AT2G02350	Chr2:617800-619091[-]	SKIP3, AtPP2-B9	SKP1 interacting partner 3	Chr2:617350-617789[-]	440	0.110437	0.473077	0.238573	1.06215	1.03768	No	Sense	#N/A	#N/A	#N/A	#N/A	#N/A	AT2G02340	525	85
AT1G61610	Chr1:22733472-22736509[+]	#N/A	S-locus lectin protein kinase family protein	Chr1:22736550-22736809[+]	260	0.0608817	0.134125	0.143477	0.980447	0.565323	No	Sense	#N/A	#N/A	#N/A	#N/A	#N/A	AT1G61620	1033	733
AT5G46760	Chr5:18974231-18976009[+]	#N/A	Basic helix-loop-helix (bHLH) DNA-binding family protein	Chr5:18976340-18976749[+]	410	0.0643466	0.085055	0.113732	0.388592	0.58896	No	Sense	#N/A	#N/A	#N/A	#N/A	#N/A	AT5G46770	1398	658
AT1G61380	Chr1:22646072-22649521[-]	SD1-29	S-domain-1 29	Chr1:22645148-22646051[-]	904	0.198449	0.36647	0.283701	1.70367	1.81175	No	Sense	#N/A	#N/A	#N/A	#N/A	#N/A	AT1G61370	924	0
AT1G06670	Chr1:2040433-2047612[+]	NIH	nuclear DEIH-boxhelicase	Chr1:2047613-2047824[+]	212	0.149333	0.191909	0.0879815	0.701421	1.33712	No	Sense	#N/A	#N/A	#N/A	#N/A	#N/A	AT1G06680	212	0
AT5G45190	Chr5:18277620-18281875[-]	#N/A	Cyclin family protein	Chr5:18277140-18277349[-]	210	0.125629	0.415149	0.199844	0.657522	1.12488	No	Sense	#N/A	#N/A	#N/A	#N/A	#N/A	AT5G45180	1033	553
AT5G54980	Chr5:22315699-22316601[+]	#N/A	Uncharacterised protein family (UPF0497)	Chr5:22316662-22317001[+]	340	0.108632	0.0854719	0.178292	0.187438	0.972688	No	Sense	#N/A	#N/A	#N/A	#N/A	#N/A	AT5G54990	903	503
AT2G30860	Chr2:13138997-13140245[+]	ATGSTF9, GLUTTR, ATGSTF7, GSTF9	glutathione S-transferase PHI 9	Chr2:13140286-13140545[+]	260	0.0608817	0.0670626	0.107608	0.40852	0.545133	No	Sense	#N/A	#N/A	#N/A	#N/A	#N/A	AT2G30870	1111	811
AT1G67970	Chr1:25484699-25486462[-]	AT-HSFA8, HSFA8	heat shock transcription factor A8	Chr1:25484263-25484688[-]	426	0.12386	0.272868	0.197029	0.548529	1.08439	No	Sense	#N/A	#N/A	#N/A	#N/A	#N/A	AT1G67960	436	0
AT3G13110	Chr3:4214617-4216302[-]	ATSERAT2;2, SAT-1, SAT-A, SAT3, SAT-M, SERAT2;2	serine acetyltransferase 2;2	Chr3:4214174-4214586[-]	413	0.30662	0.464404	0.203231	1.77454	2.6692	No	Sense	#N/A	#N/A	#N/A	#N/A	#N/A	AT3G13100	443	0
AT1G50170	Chr1:18582024-18583724[+]	ATSIRB, SIRB	sirohydrochlorin ferrochelatase B	Chr1:18583755-18583964[+]	210	0.0753774	0.24909	0.0666146	0.227604	0.649929	No	Sense	#N/A	#N/A	#N/A	#N/A	#N/A	AT1G50180	510	270
AT2G34310	Chr2:14477715-14479988[-]	#N/A	unknown protein; FUNCTIONS IN: molecular_function unknown; INVOLVED IN: biological_process unknown; LOCATED IN: cellular_component unknown; EXPRESSED IN: 24 plant structures; EXPRESSED DURING: 13 growth stages; BEST Arabidopsis thaliana protein match is: unknown protein (TAIR:AT1G29530.1); Has 1236 Blast hits to 680 proteins in 89 species: Archae - 0; Bacteria - 0; Metazoa - 473; Fungi - 0; Plant…	Chr2:14477431-14477714[-]	284	0.185789	0.470698	0.394058	0.579695	1.58962	No	Sense	#N/A	#N/A	#N/A	#N/A	#N/A	AT2G34300	284	0
AT2G01080	Chr2:77888-79334[+]	#N/A	Late embryogenesis abundant (LEA) hydroxyproline-rich glycoprotein family	Chr2:79355-79924[+]	570	0.119466	0.219324	0.272743	1.74353	1.01027	No	Sense	#N/A	#N/A	#N/A	#N/A	#N/A	AT2G01090	654	104
AT3G16360	Chr3:5554258-5555603[+]	AHP4	HPT phosphotransmitter 4	Chr3:5555644-5555843[+]	200	0.105528	0.174363	0.396357	0.0796613	0.892403	No	Sense	#N/A	#N/A	#N/A	#N/A	#N/A	AT3G16370	1106	866
AT1G64200	Chr1:23828526-23830002[-]	VHA-E3	vacuolar H+-ATPase subunit E isoform 3	Chr1:23828049-23828285[-]	237	0.0890535	0.122618	0.137726	0.179266	0.753083	No	Sense	#N/A	#N/A	#N/A	#N/A	#N/A	AT1G64195	477	0
AT3G46460	Chr3:17095878-17097452[-]	UBC13	ubiquitin-conjugating enzyme 13	Chr3:17095640-17095867[-]	228	0.161995	0.203933	0.122711	0.41927	1.3584	No	Sense	#N/A	#N/A	#N/A	#N/A	#N/A	AT3G46450	238	0
AT1G72920	Chr1:27437928-27439091[+]	#N/A	Toll-Interleukin-Resistance (TIR) domain family protein	Chr1:27439102-27439401[+]	300	0.140704	0.0387473	0.0621736	0.867423	1.17237	No	Sense	#N/A	#N/A	#N/A	#N/A	#N/A	AT1G72930	360	50
AT3G54900	Chr3:20341588-20342393[-]	CXIP1, ATGRXCP	CAX interacting protein 1	Chr3:20341104-20341407[-]	304	0.138853	0.114712	0.0460166	0.454209	1.13968	No	Sense	#N/A	#N/A	#N/A	#N/A	#N/A	AT3G54890	484	0
AT1G61870	Chr1:22865004-22866615[-]	PPR336	pentatricopeptide repeat 336	Chr1:22864620-22865003[-]	384	0.247332	0.484341	0.242866	1.71493	2.00955	No	Sense	#N/A	#N/A	#N/A	#N/A	#N/A	AT1G61860	384	0
AT1G74840	Chr1:28115897-28117405[-]	#N/A	Homeodomain-like superfamily protein	Chr1:28115230-28115806[-]	577	0.210325	0.17124	0.137385	0.966429	1.70129	No	Sense	#N/A	#N/A	#N/A	#N/A	#N/A	AT1G74830	667	0
AT4G02425	Chr4:1067280-1068785[-]	#N/A	unknown protein; FUNCTIONS IN: molecular_function unknown; INVOLVED IN: biological_process unknown; LOCATED IN: chloroplast; Has 29 Blast hits to 28 proteins in 15 species: Archae - 0; Bacteria - 0; Metazoa - 6; Fungi - 0; Plants - 23; Viruses - 0; Other Eukaryotes - 0 (source: NCBI BLink).	Chr4:1067060-1067259[-]	200	0.184675	0.523088	0.303096	0.955936	1.46984	No	Sense	#N/A	#N/A	#N/A	#N/A	#N/A	AT4G02420	907	687
AT5G57990	Chr5:23470014-23474104[-]	UBP23	ubiquitin-specific protease 23	Chr5:23469769-23469973[-]	205	0.18017	0.198462	0.136479	0.518123	1.43399	No	Sense	#N/A	#N/A	#N/A	#N/A	#N/A	AT5G57980	245	0
AT4G16390	Chr4:9257958-9260277[+]	SVR7	pentatricopeptide (PPR) repeat-containing protein	Chr4:9260328-9260563[+]	236	0.469512	0.615688	0.395171	1.77775	3.71464	No	Sense	#N/A	#N/A	#N/A	#N/A	#N/A	AT4G16400	286	0
AT3G22230	Chr3:7843967-7844597[-]	#N/A	Ribosomal L27e protein family	Chr3:7843487-7843826[-]	340	0.124151	0.170944	0.0411443	0.156199	0.972688	No	Sense	#N/A	#N/A	#N/A	#N/A	#N/A	AT3G22220	1092	612
AT2G31870	Chr2:13549861-13553844[-]	TEJ	Poly (ADP-ribose) glycohydrolase (PARG)	Chr2:13549537-13549790[-]	254	0.145413	0.549174	0.715975	1.56814	1.13669	No	Sense	#N/A	#N/A	#N/A	#N/A	#N/A	AT2G31865	324	0
AT4G25840	Chr4:13139015-13140960[+]	GPP1	glycerol-3-phosphatase 1	Chr4:13141001-13141200[+]	200	0.13191	0.145302	0.0699453	0.42486	1.02364	No	Sense	#N/A	#N/A	#N/A	#N/A	#N/A	AT4G25845	1127	887
AT1G36622	Chr1:13836131-13836954[-]	#N/A	unknown protein; LOCATED IN: endomembrane system; BEST Arabidopsis thaliana protein match is: unknown protein (TAIR:AT1G36640.1); Has 12 Blast hits to 12 proteins in 2 species: Archae - 0; Bacteria - 0; Metazoa - 0; Fungi - 0; Plants - 12; Viruses - 0; Other Eukaryotes - 0 (source: NCBI BLink).	Chr1:13835565-13836050[-]	486	0.446466	0.74514	0.478258	2.81879	3.43232	No	Sense	#N/A	#N/A	#N/A	#N/A	#N/A	AT1G36620	566	96
AT2G09990	Chr2:3781328-3782049[+]	#N/A	Ribosomal protein S5 domain 2-like superfamily protein	Chr2:3782210-3782529[+]	320	0.0494664	0.12714	0.0582877	0.282134	0.377303	No	Sense	#N/A	#N/A	#N/A	#N/A	#N/A	AT2G09992	559	79
AT5G19100	Chr5:6408242-6409417[-]	#N/A	Eukaryotic aspartyl protease family protein	Chr5:6407942-6408201[-]	260	0.105528	0.13949	0.186521	0.828478	0.797913	No	Sense	#N/A	#N/A	#N/A	#N/A	#N/A	AT5G19097	633	343
AT4G28780	Chr4:14215545-14217579[+]	#N/A	GDSL-like Lipase/Acylhydrolase superfamily protein	Chr4:14217610-14217889[+]	280	0.169599	0.352877	0.216497	0.322439	1.27486	No	Sense	#N/A	#N/A	#N/A	#N/A	#N/A	AT4G28790	680	370
AT5G65830	Chr5:26342116-26343321[-]	ATRLP57, RLP57	receptor like protein 57	Chr5:26341790-26342075[-]	286	0.313633	1.28029	0.603258	1.37411	2.34939	No	Sense	#N/A	#N/A	#N/A	#N/A	#N/A	AT5G65820	326	0
AT2G41310	Chr2:17221933-17224427[+]	ATRR3, ARR8, RR3	response regulator 3	Chr2:17224428-17224917[+]	490	2.02442	1.92155	2.14118	2.82879	15.0091	No	Sense	#N/A	#N/A	#N/A	#N/A	#N/A	AT2G41312	1095	605
AT1G19000	Chr1:6560792-6562786[-]	#N/A	Homeodomain-like superfamily protein	Chr1:6560490-6560731[-]	242	0.13082	0.0240169	0.0192687	0.263343	0.954442	No	Sense	#N/A	#N/A	#N/A	#N/A	#N/A	AT1G18990	302	0
AT5G41740	Chr5:16688626-16693119[+]	#N/A	Disease resistance protein (TIR-NBS-LRR class) family	Chr5:16693180-16693499[+]	320	0.311788	0.422698	0.339129	2.51054	2.2668	No	Sense	#N/A	#N/A	#N/A	#N/A	#N/A	AT5G41750	789	509
AT1G61280	Chr1:22603586-22604081[+]	#N/A	Phosphatidylinositol N-acetylglucosaminyltransferase, GPI19/PIG-P subunit	Chr1:22604102-22605008[+]	907	0.191976	0.416523	0.318751	1.59264	1.38904	No	Sense	#N/A	#N/A	#N/A	#N/A	#N/A	AT1G61290	927	0
AT1G55475	Chr1:20711514-20713310[+]	#N/A	unknown protein; FUNCTIONS IN: molecular_function unknown; INVOLVED IN: biological_process unknown; LOCATED IN: endomembrane system; BEST Arabidopsis thaliana protein match is: unknown protein (TAIR:AT3G13480.1); Has 35333 Blast hits to 34131 proteins in 2444 species: Archae - 798; Bacteria - 22429; Metazoa - 974; Fungi - 991; Plants - 531; Viruses - 0; Other Eukaryotes - 9610 (source: NCBI BLink…	Chr1:20713321-20713683[+]	363	0.174427	0.304214	0.218378	0.877811	1.25813	No	Sense	#N/A	#N/A	#N/A	#N/A	#N/A	AT1G55480	373	0
AT1G55310	Chr1:20630065-20632973[+]	SR33, SCL33, At-SCL33	SC35-like splicing factor 33	Chr1:20632974-20633359[+]	386	0.246051	0.496889	0.277848	1.14195	1.75434	No	Sense	#N/A	#N/A	#N/A	#N/A	#N/A	AT1G55320	386	0
AT2G35450	Chr2:14903045-14905372[-]	#N/A	catalytics;hydrolases	Chr2:14902435-14902944[-]	510	0.200504	0.627706	0.354389	1.11526	1.35435	No	Sense	#N/A	#N/A	#N/A	#N/A	#N/A	AT2G35430	659	59
AT2G16070	Chr2:6983892-6985462[-]	PDV2	plastid division2	Chr2:6983652-6983891[-]	240	0.153896	0.290605	0.0388585	0.508947	1.02801	No	Sense	#N/A	#N/A	#N/A	#N/A	#N/A	AT2G16060	260	20
AT3G08670	Chr3:2633728-2636715[+]	#N/A	unknown protein; BEST Arabidopsis thaliana protein match is: unknown protein (TAIR:AT3G51540.1); Has 48380 Blast hits to 29827 proteins in 1356 species: Archae - 46; Bacteria - 5589; Metazoa - 17361; Fungi - 13192; Plants - 2237; Viruses - 905; Other Eukaryotes - 9050 (source: NCBI BLink).	Chr3:2636786-2637075[+]	290	0.153896	0.290605	0.563448	1.04002	1.00614	No	Sense	#N/A	#N/A	#N/A	#N/A	#N/A	AT3G08680	844	534
AT2G36810	Chr2:15425479-15439462[-]	#N/A	ARM repeat superfamily protein	Chr2:15425017-15425478[-]	462	0.194154	0.0629014	0.0807449	0.149437	1.26123	No	Sense	#N/A	#N/A	#N/A	#N/A	#N/A	AT2G36800	462	0
AT5G48610	Chr5:19711542-19715910[+]	#N/A	unknown protein; Has 43043 Blast hits to 23768 proteins in 1327 species: Archae - 108; Bacteria - 3952; Metazoa - 17076; Fungi - 3614; Plants - 1643; Viruses - 204; Other Eukaryotes - 16446 (source: NCBI BLink).	Chr5:19715931-19716475[+]	545	0.183949	0.661192	0.564696	0.838028	1.18473	No	Sense	#N/A	#N/A	#N/A	#N/A	#N/A	AT5G48620	565	0
AT1G10950	Chr1:3659209-3663984[+]	TMN1, AtTMN1	transmembrane nine 1	Chr1:3664015-3664385[+]	371	0.483553	0.328986	0.263944	1.78934	3.02797	No	Sense	#N/A	#N/A	#N/A	#N/A	#N/A	AT1G10960	401	0
AT1G73540	Chr1:27645658-27646698[-]	atnudt21, NUDT21	nudix hydrolase homolog 21	Chr1:27645395-27645657[-]	263	0.280874	0.220992	0.195031	1.29235	1.75646	No	Sense	#N/A	#N/A	#N/A	#N/A	#N/A	AT1G73530	263	0
AT1G72600	Chr1:27338125-27340328[+]	#N/A	hydroxyproline-rich glycoprotein family protein	Chr1:27340389-27340818[+]	430	0.196332	0.486594	0.35786	1.0992	1.2208	Yes	Sense	#N/A	#N/A	#N/A	#N/A	#N/A	AT1G72620	750	260
AT1G31340	Chr1:11217845-11219458[-]	RUB1, NEDD8, ATRUB1	related to ubiquitin 1	Chr1:11217394-11217834[-]	441	0.191435	0.118614	0.0528687	0.794807	1.19035	No	Sense	#N/A	#N/A	#N/A	#N/A	#N/A	AT1G31335	451	0
AT3G26640	Chr3:9793220-9794457[+]	LWD2	Transducin/WD40 repeat-like superfamily protein	Chr3:9794508-9794917[+]	410	0.167301	0.34022	0.250211	0.828996	1.03708	No	Sense	#N/A	#N/A	#N/A	#N/A	#N/A	AT3G26650	613	153
AT3G59750	Chr3:22069855-22071821[-]	#N/A	Concanavalin A-like lectin protein kinase family protein	Chr3:22069575-22069814[-]	240	0.114705	0.2527	0.10137	1.10833	0.707532	No	Sense	#N/A	#N/A	#N/A	#N/A	#N/A	AT3G59740	796	526
AT2G30575	Chr2:13020397-13024208[-]	GAUT5, LGT5	los glycosyltransferase 5	Chr2:13020195-13020396[-]	202	0.208967	0.258955	0.253927	0.552108	1.27338	No	Sense	#N/A	#N/A	#N/A	#N/A	#N/A	AT2G30570	202	0
AT2G43530	Chr2:18070056-18070718[+]	#N/A	Scorpion toxin-like knottin superfamily protein	Chr2:18070759-18070972[+]	214	0.123281	0.0814779	0.0871592	0.670049	0.735901	No	Sense	#N/A	#N/A	#N/A	#N/A	#N/A	AT2G43535	254	0
AT5G59540	Chr5:23996073-23997590[-]	#N/A	2-oxoglutarate (2OG) and Fe(II)-dependent oxygenase superfamily protein	Chr5:23995735-23996042[-]	308	0.222706	0.396279	0.393631	0.948349	1.24418	No	Sense	#N/A	#N/A	#N/A	#N/A	#N/A	AT5G59530	338	0
AT2G40316	Chr2:16836210-16839189[+]	#N/A	FUNCTIONS IN: molecular_function unknown; LOCATED IN: endomembrane system; EXPRESSED IN: 22 plant structures; EXPRESSED DURING: 13 growth stages; CONTAINS InterPro DOMAIN/s: Autophagy-related protein 27 (InterPro:IPR018939); Has 138 Blast hits to 138 proteins in 57 species: Archae - 0; Bacteria - 0; Metazoa - 32; Fungi - 62; Plants - 33; Viruses - 0; Other Eukaryotes - 11 (source: NCBI BLink).	Chr2:16839240-16839449[+]	210	0.125629	0.0830299	0.0222049	0.682811	0.699924	No	Sense	#N/A	#N/A	#N/A	#N/A	#N/A	AT2G40320	957	697
AT3G01970	Chr3:326397-327412[-]	WRKY45, ATWRKY45	WRKY DNA-binding protein 45	Chr3:325847-326286[-]	440	0.203862	0.264186	0.487497	0.639705	1.1334	Yes	Sense	#N/A	#N/A	#N/A	#N/A	#N/A	AT3G01960	1309	759
AT3G01435	Chr3:166619-168288[-]	#N/A	Expressed protein	Chr3:166248-166598[-]	351	0.285618	0.364291	0.345409	0.801909	1.57034	No	Sense	#N/A	#N/A	#N/A	#N/A	#N/A	AT3G01430	371	0
AT2G30942	Chr2:13170871-13172021[+]	#N/A	Protein of unknown function (DUF3317)	Chr2:13172102-13172360[+]	259	0.0814891	0.314167	0.252055	0.410097	0.445897	No	Sense	#N/A	#N/A	#N/A	#N/A	#N/A	AT2G30945	339	0
AT4G30920	Chr4:15046457-15049373[-]	#N/A	Cytosol aminopeptidase family protein	Chr4:15045667-15046366[-]	700	0.495663	0.634046	0.430976	2.97724	2.68834	No	Sense	#N/A	#N/A	#N/A	#N/A	#N/A	AT4G30910	1141	391
AT5G10560	Chr5:3336255-3339366[-]	#N/A	Glycosyl hydrolase family protein	Chr5:3335965-3336214[-]	250	0.14774	0.511464	0.223825	0.42486	0.797913	No	Sense	#N/A	#N/A	#N/A	#N/A	#N/A	AT5G10550	1022	732
AT4G36780	Chr4:17332517-17334349[-]	BEH2	BES1/BZR1 homolog 2	Chr4:17332137-17332366[-]	230	0.183528	0.20216	0.162192	0.369444	0.981415	No	Sense	#N/A	#N/A	#N/A	#N/A	#N/A	AT4G36770	892	512
AT5G01940	Chr5:363594-364769[-]	#N/A	eukaryotic translation initiation factor 2B family protein / eIF-2B family protein	Chr5:363024-363293[-]	270	0.197866	0.0968682	0.136005	0.862998	1.04989	No	Sense	#N/A	#N/A	#N/A	#N/A	#N/A	AT5G01930	692	152
AT5G46270	Chr5:18764349-18769090[-]	#N/A	Disease resistance protein (TIR-NBS-LRR class) family	Chr5:18764039-18764278[-]	240	0.13191	0.169519	0.116575	0.508947	0.699924	No	Sense	#N/A	#N/A	#N/A	#N/A	#N/A	AT5G46260	990	680
AT5G19730	Chr5:6670458-6673282[+]	#N/A	Pectin lyase-like superfamily protein	Chr5:6673313-6673652[+]	340	0.201745	0.444454	0.205721	0.765374	1.01901	No	Sense	#N/A	#N/A	#N/A	#N/A	#N/A	AT5G19740	650	280
AT5G25890	Chr5:9033415-9034834[+]	IAA28, IAR2	indole-3-acetic acid inducible 28	Chr5:9034905-9035324[+]	420	0.163318	0.373634	0.477404	0.796613	0.812412	No	Sense	#N/A	#N/A	#N/A	#N/A	#N/A	AT5G25900	1183	693
AT3G08700	Chr3:2643482-2644545[+]	UBC12	ubiquitin-conjugating enzyme 12	Chr3:2644576-2644785[+]	210	0.125629	0.0553533	0.0666146	0.126447	0.624932	No	Sense	#N/A	#N/A	#N/A	#N/A	#N/A	AT3G08710	621	381
AT1G32370	Chr1:11676961-11678449[+]	TOM2B, TTM1	tobamovirus multiplication 2B	Chr1:11678550-11679059[+]	510	0.0827673	0.0569813	0	0.395703	0.41172	No	Sense	#N/A	#N/A	#N/A	#N/A	#N/A	AT1G32375	780	170
AT4G25350	Chr4:12963382-12966448[-]	SHB1	EXS (ERD1/XPR1/SYG1) family protein	Chr4:12962972-12963221[-]	250	0.326635	0.387473	0.0888194	2.17488	1.59983	No	Sense	#N/A	#N/A	#N/A	#N/A	#N/A	AT4G25340	682	312
AT5G47760	Chr5:19342884-19345039[-]	PGLP2, ATPGLP2, ATPK5	2-phosphoglycolate phosphatase 2	Chr5:19342464-19342833[-]	370	0.228169	0.518376	0.36548	0.875557	1.10664	No	Sense	#N/A	#N/A	#N/A	#N/A	#N/A	AT5G47750	522	102
AT3G20000	Chr3:6967582-6970566[+]	TOM40	translocase of the outer mitochondrial membrane 40	Chr3:6970637-6970856[+]	220	0.19187	0.264186	0.296738	0.941452	0.930581	No	Sense	#N/A	#N/A	#N/A	#N/A	#N/A	AT3G20010	785	495
AT3G17040	Chr3:5809266-5812678[-]	HCF107	high chlorophyll fluorescent 107	Chr3:5808463-5808665[-]	203	0.259922	0.28631	0.344558	0.889486	1.24124	No	Sense	#N/A	#N/A	#N/A	#N/A	#N/A	AT3G17030	803	0
AT5G16210	Chr5:5290867-5297974[-]	#N/A	HEAT repeat-containing protein	Chr5:5290203-5290776[-]	574	0.340118	0.698666	0.503671	0.712418	1.61873	No	Sense	#N/A	#N/A	#N/A	#N/A	#N/A	AT5G16200	664	0
AT5G17847	Chr5:5898659-5898787[+]	#N/A	unknown protein; LOCATED IN: endomembrane system; Has 30201 Blast hits to 17322 proteins in 780 species: Archae - 12; Bacteria - 1396; Metazoa - 17338; Fungi - 3422; Plants - 5037; Viruses - 0; Other Eukaryotes - 2996 (source: NCBI BLink).	Chr5:5898798-5899007[+]	210	0.226132	0.359796	0.288663	0.758679	1.07488	No	Sense	#N/A	#N/A	#N/A	#N/A	#N/A	AT5G17850	465	245
AT2G03140	Chr2:941912-950328[+]	#N/A	alpha/beta-Hydrolases superfamily protein	Chr2:950359-951558[+]	1200	0.334173	0.847597	0.831572	1.21262	1.58795	No	Sense	#N/A	#N/A	#N/A	#N/A	#N/A	AT2G03150	1604	374
AT3G09320	Chr3:2861743-2864245[-]	#N/A	DHHC-type zinc finger family protein	Chr3:2861360-2861722[-]	363	0.247105	0.352248	0.33399	0.80466	1.17136	No	Sense	#N/A	#N/A	#N/A	#N/A	#N/A	AT3G09310	383	0
AT5G59910	Chr5:24127128-24127935[+]	HTB4	Histone superfamily protein	Chr5:24128106-24128755[+]	650	0.186704	0.304017	0.172173	0.923254	0.880289	No	Sense	#N/A	#N/A	#N/A	#N/A	#N/A	AT5G59920	820	0
AT4G13990	Chr4:8084395-8086095[+]	#N/A	Exostosin family protein	Chr4:8086096-8086395[+]	300	0.228645	0.290605	0.341955	0.654993	1.01489	No	Sense	#N/A	#N/A	#N/A	#N/A	#N/A	AT4G13992	1244	944
AT1G04840	Chr1:1362867-1364962[-]	#N/A	Tetratricopeptide repeat (TPR)-like superfamily protein	Chr1:1362297-1362586[-]	290	0.218335	0.701459	0.530619	0.860709	0.959378	No	Sense	#N/A	#N/A	#N/A	#N/A	#N/A	AT1G04830	847	277
AT2G36900	Chr2:15491040-15492822[-]	MEMB11, ATMEMB11	membrin 11	Chr2:15490520-15491009[-]	490	0.312278	0.24909	0.237909	0.56359	1.33914	No	Sense	#N/A	#N/A	#N/A	#N/A	#N/A	AT2G36895	692	172
AT5G59710	Chr5:24057407-24061918[+]	VIP2, AtVIP2	VIRE2 interacting protein 2	Chr5:24061939-24062576[+]	638	0.611998	0.601251	0.533543	1.45671	2.58357	No	Sense	#N/A	#N/A	#N/A	#N/A	#N/A	AT5G59720	658	0
AT3G57750	Chr3:21393979-21395288[+]	#N/A	Protein kinase superfamily protein	Chr3:21395359-21395592[+]	234	0.834305	0.322894	0.458331	1.99721	3.34259	No	Sense	#N/A	#N/A	#N/A	#N/A	#N/A	AT3G57760	304	0
AT2G41350	Chr2:17231341-17233557[+]	#N/A	unknown protein; BEST Arabidopsis thaliana protein match is: unknown protein (TAIR:AT2G21980.1); Has 35333 Blast hits to 34131 proteins in 2444 species: Archae - 798; Bacteria - 22429; Metazoa - 974; Fungi - 991; Plants - 531; Viruses - 0; Other Eukaryotes - 9610 (source: NCBI BLink).	Chr2:17233608-17233927[+]	320	0.41222	0.345093	0.349726	0.995767	1.64045	No	Sense	#N/A	#N/A	#N/A	#N/A	#N/A	AT2G41360	816	446
AT1G71040	Chr1:26796966-26800322[-]	LPR2	Cupredoxin superfamily protein	Chr1:26796365-26796935[-]	571	0.378867	0.295185	0.293991	0.957982	1.49852	Yes	Sense	#N/A	#N/A	#N/A	#N/A	#N/A	AT1G71030	601	0
AT4G11560	Chr4:6999896-7003493[-]	#N/A	bromo-adjacent homology (BAH) domain-containing protein	Chr4:6999256-6999885[-]	630	0.284759	0.33212	0.177639	0.539505	1.12488	No	Sense	#N/A	#N/A	#N/A	#N/A	#N/A	AT4G11550	1066	426
AT3G17626	Chr3:6027994-6028633[+]	#N/A	structural constituent of ribosome	Chr3:6028664-6028913[+]	250	0.263821	0.607628	0.487497	1.08629	1.02602	No	Sense	#N/A	#N/A	#N/A	#N/A	#N/A	AT3G17630	567	317
AT1G78172	Chr1:29415530-29415921[+]	#N/A	unknown protein; FUNCTIONS IN: molecular_function unknown; INVOLVED IN: biological_process unknown; LOCATED IN: cellular_component unknown; Has 30201 Blast hits to 17322 proteins in 780 species: Archae - 12; Bacteria - 1396; Metazoa - 17338; Fungi - 3422; Plants - 5037; Viruses - 0; Other Eukaryotes - 2996 (source: NCBI BLink).	Chr1:29416112-29416601[+]	490	0.11845	0.0711685	0.10468	0.140898	0.460664	No	Sense	#N/A	#N/A	#N/A	#N/A	#N/A	AT1G78180	991	311
AT2G29630	Chr2:12666935-12670311[+]	THIC	thiaminC	Chr2:12670582-12671205[+]	624	1.47131	2.13296	1.88314	4.35754	5.63641	No	Sense	#N/A	#N/A	#N/A	#N/A	#N/A	AT2G29640	894	0
AT3G10490	Chr3:3267835-3270883[+]	ANAC052, NAC052	NAC domain containing protein 52	Chr3:3270944-3271193[+]	250	0.379902	0.674203	0.503606	0.828478	1.44884	No	Sense	#N/A	#N/A	#N/A	#N/A	#N/A	AT3G10500	606	296
AT3G17890	Chr3:6127041-6127874[+]	#N/A	unknown protein; Has 31 Blast hits to 31 proteins in 12 species: Archae - 0; Bacteria - 4; Metazoa - 5; Fungi - 10; Plants - 12; Viruses - 0; Other Eukaryotes - 0 (source: NCBI BLink).	Chr3:6127925-6128304[+]	380	0.222165	0.3059	0.184067	0.545051	0.842672	No	Sense	#N/A	#N/A	#N/A	#N/A	#N/A	AT3G17900	631	201
AT2G45910	Chr2:18894074-18898528[+]	#N/A	U-box domain-containing protein kinase family protein	Chr2:18898559-18899083[+]	525	1.88946	3.09978	2.31819	4.73416	7.13922	No	Sense	#N/A	#N/A	#N/A	#N/A	#N/A	AT2G45920	555	0
AT3G16760	Chr3:5703013-5705313[+]	#N/A	Tetratricopeptide repeat (TPR)-like superfamily protein	Chr3:5705344-5705661[+]	318	0.282073	0.219324	0.146636	0.835024	1.05649	No	Sense	#N/A	#N/A	#N/A	#N/A	#N/A	AT3G16770	348	0
AT1G16920	Chr1:5787330-5789249[-]	RAB11, ATRABA1B, RABA1b	RAB GTPase homolog A1B	Chr1:5787113-5787319[-]	207	0.433329	0.477322	0.54064	0.92361	1.59765	No	Sense	#N/A	#N/A	#N/A	#N/A	#N/A	AT1G16916	217	0
AT4G17245	Chr4:9669365-9670005[+]	#N/A	RING/U-box superfamily protein	Chr4:9670156-9670880[+]	725	0.247446	0.0721501	0.128635	0.329633	0.847149	No	Sense	#N/A	#N/A	#N/A	#N/A	#N/A	AT4G17250	875	0
AT3G26360	Chr3:9655657-9656545[-]	#N/A	Ribosomal protein S21 family protein	Chr3:9655047-9655416[-]	370	0.509447	1.40292	0.803969	1.62985	1.71964	No	Sense	#N/A	#N/A	#N/A	#N/A	#N/A	AT3G26350	926	396
AT1G78790	Chr1:29623529-29625078[-]	#N/A	unknown protein; CONTAINS InterPro DOMAIN/s: Protein of unknown function DUF2008 (InterPro:IPR018552); Has 69 Blast hits to 69 proteins in 28 species: Archae - 0; Bacteria - 0; Metazoa - 33; Fungi - 0; Plants - 33; Viruses - 0; Other Eukaryotes - 3 (source: NCBI BLink).	Chr1:29623157-29623478[-]	322	0.507978	0.595649	0.50685	0.989582	1.71177	No	Sense	#N/A	#N/A	#N/A	#N/A	#N/A	AT1G78780	372	0
AT5G18370	Chr5:6085036-6088926[-]	#N/A	Disease resistance protein (TIR-NBS-LRR class) family	Chr5:6084363-6084595[-]	233	1.10963	1.6214	1.04067	2.32488	3.46958	No	Sense	#N/A	#N/A	#N/A	#N/A	#N/A	AT5G18362	673	0
AT3G42630	Chr3:14722250-14723857[+]	#N/A	Pentatricopeptide repeat (PPR) superfamily protein	Chr3:14723888-14724308[+]	421	0.626653	1.68426	1.36235	2.71214	1.93269	No	Sense	#N/A	#N/A	#N/A	#N/A	#N/A	AT3G42640	451	0
AT1G07310	Chr1:2247509-2248961[-]	#N/A	Calcium-dependent lipid-binding (CaLB domain) family protein	Chr1:2246493-2247118[-]	626	0.80056	1.79373	1.56774	4.14788	2.4618	No	Sense	#N/A	#N/A	#N/A	#N/A	#N/A	AT1G07300	1016	46
AT1G48170	Chr1:17788786-17790093[+]	#N/A	unknown protein; Has 78 Blast hits to 78 proteins in 34 species: Archae - 0; Bacteria - 0; Metazoa - 30; Fungi - 0; Plants - 48; Viruses - 0; Other Eukaryotes - 0 (source: NCBI BLink).	Chr1:17790134-17790453[+]	320	0.362754	0.599372	0.262295	0.945978	1.1155	No	Sense	#N/A	#N/A	#N/A	#N/A	#N/A	AT1G48175	413	53
AT4G35760	Chr4:16942321-16944677[-]	#N/A	NAD(P)H dehydrogenase (quinone)s	Chr4:16941863-16942250[-]	388	0.299178	0.134817	0.168253	1.01288	0.920003	No	Sense	#N/A	#N/A	#N/A	#N/A	#N/A	AT4G35750	458	0
AT5G57070	Chr5:23096174-23098451[+]	#N/A	hydroxyproline-rich glycoprotein family protein	Chr5:23098502-23098958[+]	457	0.404102	0.457845	0.734655	0.999398	1.24057	No	Sense	#N/A	#N/A	#N/A	#N/A	#N/A	AT5G57080	507	0
AT4G26500	Chr4:13382198-13383641[-]	EMB1374, CPSUFE, ATSUFE, SUFE1	chloroplast sulfur E	Chr4:13381858-13382097[-]	240	0.263821	0.242171	0.194292	0.907254	0.765542	No	Sense	#N/A	#N/A	#N/A	#N/A	#N/A	AT4G26488	572	232
AT5G38860	Chr5:15558956-15561126[+]	BIM3	BES1-interacting Myc-like protein 3	Chr5:15561227-15561464[+]	238	0.443396	0.683776	0.666146	1.45042	1.27927	No	Sense	#N/A	#N/A	#N/A	#N/A	#N/A	AT5G38870	338	0
AT5G02860	Chr5:654102-656561[+]	#N/A	Pentatricopeptide repeat (PPR) superfamily protein	Chr5:657002-657785[+]	784	1.37295	2.59468	2.69432	3.98984	3.93707	No	Sense	#N/A	#N/A	#N/A	#N/A	#N/A	AT5G02870	1224	0
AT1G67630	Chr1:25344440-25348406[-]	POLA2	DNA polymerase alpha 2	Chr1:25344067-25344309[-]	243	0.390846	1.17199	0.805954	0.808634	1.10173	No	Sense	#N/A	#N/A	#N/A	#N/A	#N/A	AT1G67626	373	0
AT5G56020	Chr5:22684405-22686369[+]	#N/A	Got1/Sft2-like vescicle transport protein family	Chr5:22686390-22686801[+]	412	1.07577	1.6082	1.47134	2.86162	2.93051	No	Sense	#N/A	#N/A	#N/A	#N/A	#N/A	AT5G56030	432	0
AT1G25180	Chr1:8829564-8830340[+]	#N/A	unknown protein; BEST Arabidopsis thaliana protein match is: unknown protein (TAIR:AT1G25025.1); Has 8171 Blast hits to 2608 proteins in 364 species: Archae - 0; Bacteria - 499; Metazoa - 1710; Fungi - 974; Plants - 287; Viruses - 83; Other Eukaryotes - 4618 (source: NCBI BLink).	Chr1:8830341-8830940[+]	600	1.0289	0.958995	0.901517	1.89417	2.70346	No	Sense	#N/A	#N/A	#N/A	#N/A	#N/A	AT1G25209	1383	783
AT5G39340	Chr5:15748851-15750507[+]	AHP3, ATHP2	histidine-containing phosphotransmitter 3	Chr5:15750538-15750928[+]	391	0.43183	0.624317	0.691701	1.11376	1.11433	No	Sense	#N/A	#N/A	#N/A	#N/A	#N/A	AT5G39350	421	0
AT1G31830	Chr1:11418625-11420837[-]	#N/A	Amino acid permease family protein	Chr1:11418280-11418604[-]	325	0.438349	0.250367	0.31565	0.669972	1.13065	No	Sense	#N/A	#N/A	#N/A	#N/A	#N/A	AT1G31820	345	0
AT1G25112	Chr1:8815186-8815962[+]	#N/A	unknown protein; BEST Arabidopsis thaliana protein match is: unknown protein (TAIR:AT1G25025.1); Has 8171 Blast hits to 2608 proteins in 364 species: Archae - 0; Bacteria - 499; Metazoa - 1710; Fungi - 974; Plants - 287; Viruses - 83; Other Eukaryotes - 4618 (source: NCBI BLink).	Chr1:8815973-8817012[+]	1040	0.578377	0.620329	0.57391	1.27662	1.48397	No	Sense	#N/A	#N/A	#N/A	#N/A	#N/A	AT1G25141	1715	665
AT1G76560	Chr1:28728253-28728853[+]	CP12-3	CP12 domain-containing protein 3	Chr1:28728904-28729131[+]	228	2.01337	1.96286	1.30892	2.72526	4.90407	No	Sense	#N/A	#N/A	#N/A	#N/A	#N/A	AT1G76570	278	0
AT1G77420	Chr1:29093499-29095716[+]	#N/A	alpha/beta-Hydrolases superfamily protein	Chr1:29095797-29096019[+]	223	1.53797	1.85049	1.54737	3.31029	3.60163	No	Sense	#N/A	#N/A	#N/A	#N/A	#N/A	AT1G77440	303	0
AT2G04860	Chr2:1706787-1708865[-]	#N/A	Tetratricopeptide repeat (TPR)-like superfamily protein	Chr2:1706466-1706736[-]	271	0.739867	1.67285	1.5314	2.33203	1.70461	No	Sense	#N/A	#N/A	#N/A	#N/A	#N/A	AT2G04852	321	0
AT4G31351	Chr4:15217687-15217884[+]	#N/A	unknown protein; BEST Arabidopsis thaliana protein match is: unknown protein (TAIR:AT4G31354.1); Has 30201 Blast hits to 17322 proteins in 780 species: Archae - 12; Bacteria - 1396; Metazoa - 17338; Fungi - 3422; Plants - 5037; Viruses - 0; Other Eukaryotes - 2996 (source: NCBI BLink).	Chr4:15218085-15219147[+]	1063	0.650245	0.814677	0.386026	1.13909	1.47162	No	Sense	#N/A	#N/A	#N/A	#N/A	#N/A	AT4G31354	1263	0
AT4G26450	Chr4:13362556-13364935[+]	#N/A	unknown protein; Has 614 Blast hits to 492 proteins in 137 species: Archae - 0; Bacteria - 94; Metazoa - 255; Fungi - 76; Plants - 69; Viruses - 0; Other Eukaryotes - 120 (source: NCBI BLink).	Chr4:13365146-13365367[+]	222	0.8081	1.43993	2.05845	1.69848	1.74981	No	Sense	#N/A	#N/A	#N/A	#N/A	#N/A	AT4G26455	432	0
AT1G63350	Chr1:23494935-23497631[-]	#N/A	Disease resistance protein (CC-NBS-LRR class) family	Chr1:23494645-23494914[-]	270	1.16521	1.40459	0.699453	4.18222	2.49348	No	Sense	#N/A	#N/A	#N/A	#N/A	#N/A	AT1G63340	915	655
AT2G18760	Chr2:8129154-8133502[+]	CHR8	chromatin remodeling 8	Chr2:8133643-8134382[+]	740	1.26048	2.35713	2.11131	3.18645	2.66117	No	Sense	#N/A	#N/A	#N/A	#N/A	#N/A	AT2G18770	1136	276
AT1G79520	Chr1:29912251-29914615[-]	#N/A	Cation efflux family protein	Chr1:29910451-29912170[-]	1720	2.02774	3.4805	1.58326	1.87729	4.10493	No	Sense	#N/A	#N/A	#N/A	#N/A	#N/A	AT1G79510	2262	462
