# Supplementary material for: Dehydration stress extends mRNA 3′ untranslated regions with noncoding RNA functions in Arabidopsis
Source: HighWire-hosted journal article supplement (doi:10.1101/gr.218669.116), 2017-05-18
Supplement: Supplemental_Table_S4.xlsx [file Supplemental_Table_S4.xlsx]

## Sheet: Supplemental Table 4
Supplemental Table 4. Tabulated data of expression levels of 43 3' UTR extensions overlapped with sense transcripts.
Column A-F: ID and expression levels of 3' UTR extensions;
Column G: log2-transformed fold changes of expression levels of 3' UTR extensions in Dehy_3h relative to Dehy_1h;
Column H-M: ID and expression levels of sense genes;
Column N-O: log2-transformed fold changes of expression levels of sense genes in ABA_3h and Dehy_3h relative to NC;
Column P-Q: relative expression levels of sense genes in Dehy_1h and Dehy_3h (relative to ABA_1h and ABA_3h);
Column R: log2-transformed fold changes of relative expression levels of sense genes in Dehy_3h relative to Dehy_1h;
Column S: status of dose-dependent sense-antisense gene pairs.
Gene ID	NC	ABA_1h	ABA_3h	Dehy_1h	Dehy_3h	logFC(Dehy_3h/Dehy_1h)	Sense gene ID	NC	ABA_1h	ABA_3h	Dehy_1h	Dehy_3h	logFC(ABA_3h/NC)	logFC(Dehy_3h/NC)	Dehy_1h/ABA_1h	Dehy_3h/ABA_3h	logFC(Dehy_3h/Dehy_1h)	Dose-dependent
AT2G20820	0.02	0.01	0.04	0.38	0.63	0.731056	AT2G20825	0.0803998	0.184142	5.01333	0.163515	0.279899	5.96226	1.79951	0.887989	0.0558328	-3.99136	Yes
AT3G13670	0.07	0.24	0.13	0.59	1.57	1.39964	AT3G13672	0.869361	0.767466	19.3296	0.277711	0.515728	4.4747	-0.753334	0.361863	0.0266812	-3.76155	Yes
AT1G79890	0.07	0.11	0.06	0.51	0.9	0.804273	AT1G79900	0.458376	1.63123	14.6668	0.437386	0.318614	4.99985	-0.524708	0.268137	0.0217242	-3.6256	Yes
AT5G51110	0	0.02	0.01	0.98	1.57	0.68906	AT5G51105	0.114477	0.0511726	0.253693	0.0747662	0.0477809	1.14796	-1.26038	1.46097	0.188373	-2.95526	Yes
AT5G42300	0.02	0.07	0.13	1.54	2.21	0.521955	AT5G42290	0.0795615	0.963086	5.56621	0.37418	0.415388	6.1283	2.38417	0.388528	0.0746284	-2.38022	Yes
AT2G17510	0.37	0.38	0.44	0.93	1.05	0.175888	AT2G17500	31.3369	22.1992	102.777	20.0382	18.8357	1.71358	-0.734393	0.902654	0.183268	-2.30022	Yes
AT1G75440	0.25	0.8	0.74	2.48	2.18	-0.183764	AT1G75450	0.469812	1.35595	2.67318	1.45147	0.5821	2.50838	0.309178	1.07044	0.217759	-2.29741	No
AT1G09760	0.32	0.35	0.14	1.08	1.99	0.880634	AT1G09750	136.283	125.226	134.292	96.9679	35.0341	-0.0212322	-1.95977	0.774343	0.26088	-1.56959	Yes
AT2G24230	0.01	0.02	0.01	0.26	1	1.9693	AT2G24220	4.42468	4.12459	5.8143	3.54744	1.94828	0.394032	-1.18337	0.860071	0.335085	-1.35993	Yes
AT1G54150	0.24	0.35	0.28	1.48	1.99	0.425466	AT1G54160	0.743151	2.0824	8.4633	1.70176	3.45336	3.50948	2.21626	0.817212	0.40804	-1.002	Yes
AT3G17800	0.12	0.32	0.2	1.36	1.97	0.533359	AT3G17790	38.2395	159.285	283.138	77.2739	69.034	2.88837	0.852243	0.48513	0.243818	-0.992569	Yes
AT1G62600	0.2	0.24	0.2	1.06	1.98	0.908861	AT1G62610	6.83287	13.6481	23.6921	12.9752	11.3513	1.79384	0.732293	0.950696	0.479118	-0.988605	Yes
AT5G16650	0.03	0	0	0.1	0.37	1.89013	AT5G16640	1.01873	1.15637	1.22009	0.845166	0.453579	0.260213	-1.16733	0.730881	0.371764	-0.97525	Yes
AT1G68300	0.76	1.07	1.5	1.58	2.18	0.46867	AT1G68290	2.11221	2.70547	6.63114	2.42137	3.09384	1.6505	0.550643	0.894991	0.466563	-0.939801	Yes
AT3G63480	0.47	1.17	0.72	1.26	1.32	0.0660211	AT3G63470	1.81241	1.49407	1.71068	0.680277	0.407672	-0.083339	-2.1524	0.455322	0.238314	-0.93402	Yes
AT1G74300	0.13	0.32	0.23	1.75	1.04	-0.746536	AT1G74310	8.64255	3.39193	5.61268	2.21534	1.96411	-0.622766	-2.13758	0.653122	0.349943	-0.900233	No
AT5G66000	0.25	0.48	0.25	1.12	1.05	-0.0871459	AT5G65990	21.7764	57.5314	168.753	20.6313	33.1273	2.95408	0.605255	0.358609	0.196306	-0.869306	No
AT1G64670	0.16	0.44	0.42	0.36	1.87	2.36217	AT1G64660	22.2625	24.9466	48.1719	17.0606	18.5893	1.11358	-0.260143	0.683885	0.385895	-0.825544	Yes
AT4G15550	0.47	0.45	0.1	2.79	1.65	-0.755953	AT4G15545	310.09	231.949	268.293	199.352	131.122	-0.208878	-1.24178	0.859465	0.488727	-0.81441	No
AT1G55270	0.3	0.48	0.46	1.78	4.23	1.25129	AT1G55265	14.8274	47.2436	119.683	25.7702	38.4589	3.01288	1.37505	0.545475	0.32134	-0.763414	Yes
AT5G66530	0.08	0.17	0.03	0.45	0.55	0.288098	AT5G66520	5.30866	2.86412	3.90512	2.50887	2.04685	-0.44298	-1.37494	0.875966	0.524146	-0.740905	Yes
AT5G48930	0	0	0	0.48	1.01	1.09016	AT5G48920	16.3012	12.49	10.2017	11.1644	5.5761	-0.676168	-1.54765	0.893867	0.546586	-0.709612	Yes
AT2G34180	0.12	0.22	0.38	0.82	0.97	0.246278	AT2G34170	15.6803	11.14	13.3905	10.0444	7.67028	-0.227743	-1.0316	0.901652	0.572815	-0.6545	Yes
AT5G26210	0.17	0.21	0.06	1.25	4.84	1.95435	AT5G26200	17.5768	9.94366	10.9962	10.0994	7.27586	-0.676667	-1.27248	1.01566	0.661671	-0.618235	Yes
AT1G73030	0.02	0.07	0.02	0.68	1.35	0.992766	AT1G73040	3.48711	5.50444	11.6578	4.04193	5.6682	1.74119	0.700857	0.734304	0.486216	-0.594781	Yes
AT3G48030	0.32	0.53	0.51	0.71	0.93	0.393527	AT3G48020	3.0083	9.57051	28.7023	2.06611	4.12637	3.25414	0.455923	0.215884	0.143765	-0.586545	Yes
AT5G04670	0.57	0.7	0.56	1.31	2.02	0.622084	AT5G04660	1.83423	2.90042	4.82271	1.6654	1.97996	1.39466	0.110296	0.574194	0.41055	-0.483979	Yes
AT3G62580	0.03	0.16	0.05	0.74	0.94	0.332393	AT3G62590	1.1812	4.60488	15.6241	2.28622	5.57989	3.72544	2.23997	0.496479	0.357134	-0.475267	Yes
AT1G79710	0.01	0.05	0.03	0.79	0.55	-0.512714	AT1G79720	21.2563	21.8435	23.1576	13.2069	10.1	0.123595	-1.07353	0.604615	0.436142	-0.471218	No
AT3G16740	0.15	0.09	0.07	0.4	0.61	0.6271	AT3G16750	8.473	4.82758	4.79363	5.57933	4.13924	-0.821753	-1.03351	1.15572	0.863488	-0.420543	Yes
AT2G17840	0.03	0.05	0.01	7.23	8.71	0.269614	AT2G17830	3.80676	2.74145	2.65724	2.34619	1.76331	-0.518633	-1.11027	0.855821	0.663588	-0.367021	Yes
AT3G19290	0.01	0.01	0	0.59	2.11	1.82526	AT3G19300	2.39575	1.98139	1.69678	1.43858	1.06114	-0.497675	-1.17485	0.726047	0.625387	-0.215315	Yes
AT5G13980	0.14	0.22	0.04	1.38	2.61	0.915257	AT5G13990	0.942166	0.8741	0.855567	0.506613	0.430361	-0.139099	-1.13042	0.579587	0.503018	-0.204415	Yes
AT4G30620	0.08	0.26	0.18	0.51	0.85	0.728822	AT4G30610	19.3328	11.165	10.3243	8.49067	7.79918	-0.905006	-1.30966	0.760472	0.75542	-0.00961663	Yes
AT1G79850	0.33	0.49	0.21	0.69	0.98	0.507606	AT1G79840	4.09626	2.39229	2.87302	1.51975	1.82645	-0.511738	-1.16526	0.635271	0.635726	0.00103191	No
AT3G62080	0.12	0.52	0.26	0.68	0.82	0.267036	AT3G62090	3.13265	10.258	21.1391	2.13677	4.50078	2.75445	0.52279	0.208304	0.212913	0.0315761	No
AT3G12120	0.01	0.05	0.04	0.42	1.01	1.25825	AT3G12110	21.9058	22.5295	14.6618	12.3827	8.67536	-0.57925	-1.33632	0.549622	0.591698	0.106423	No
AT1G80750	0.03	0.12	0	0.38	0.39	0.0357108	AT1G80760	15.1884	14.7045	11.231	7.87835	7.17522	-0.435483	-1.08187	0.535778	0.638877	0.253901	No
AT2G01750	0.84	1.32	0.58	2.15	2.4	0.160286	AT2G01755	22.2006	12.0704	11.2364	8.59943	9.66616	-0.982418	-1.19958	0.71244	0.860254	0.271995	No
AT2G15970	0.07	0.19	0.19	1.68	9.5	2.50142	AT2G15980	5.17237	4.97513	2.89591	5.14226	2.16184	-0.836807	-1.25856	1.03359	0.746516	-0.469424	Yes
AT4G31750	0.01	0.03	0.04	0.41	3.42	3.07071	AT4G31740	0.142497	0.0940354	0.080926	0.0815537	0.0708119	-0.816179	-1.00877	0.86728	0.875036	0.0128442	No
AT3G05640	0	0.06	0.1	0.24	2.12	3.15119	AT3G05630	1.19757	3.28486	10.1572	2.24603	2.98837	3.08431	1.31924	0.683753	0.294213	-1.21662	Yes
AT4G01026	0.19	0.2	0.09	0.31	3.71	3.59113	AT4G01030	1.65834	1.96402	2.22862	1.74242	0.672829	0.426409	-1.30142	0.887171	0.301907	-1.55511	Yes
