# Supplementary material for: Dehydration stress extends mRNA 3′ untranslated regions with noncoding RNA functions in Arabidopsis
Source: HighWire-hosted journal article supplement (doi:10.1101/gr.218669.116), 2017-05-18
Supplement: Supplemental_Table_S5.xlsx [file Supplemental_Table_S5.xlsx]

## Sheet: Supplemental Table 5
Supplemental Table 5. Tabulated data of expression levels of 81 3' UTR extensions extended into the promoter regions of downstream genes.
Column A-F: ID and expression levels of 3' UTR extensions;
Column G: log2-transformed fold changes of expression levels of 3' UTR extensions in Dehy_3h relative to Dehy_1h;
Column H-M: ID and expression levels of downstream genes;
Column N-O: log2-transformed fold changes of expression levels of downstream genes in ABA_3h and Dehy_3h relative to NC;
Column P: log2-transformed fold changes of expression levels of downstream genes in Dehy_3h relative to Dehy_1h;
Column Q: status of dose-dependent upstream-downstream gene pairs.
Gene ID	NC	ABA_1h	ABA_3h	Dehy_1h	Dehy_3h	logFC(Dehy_3h/Dehy_1h)	Downstream gene ID	NC	ABA_1h	ABA_3h	Dehy_1h	Dehy_3h	logFC(ABA_3h/NC)	logFC(Dehy_3h/NC)	logFC(Dehy_3h/Dehy_1h)	Dose-dependent
AT1G19570	0.038726	0.138637	0.126201	1.93672	14.2168	2.8759	AT1G19560	0.096198	0.135562	0.108799	0.135752	0.262946	0.177569	1.45059	0.953742	Yes
AT2G27260	0.122066	0.147471	0.100916	1.91821	2.29173	0.256672	AT2G27270	0.0179279	0.00943187	0.024433	0.974667	1.48427	0.44641	6.37061	0.606767	Yes
AT1G19740	0.0219851	0.0484341	0.00971462	0.24341	0.546816	1.16764	AT1G19750	0.38542	0.376987	0.285521	0.628474	0.854803	-0.432821	1.14914	0.443733	Yes
AT3G04730	0.0376887	0.116242	0.0333073	1.27458	1.58983	0.318844	AT3G04721	0	0	0	1.08703	1.16544	0	16.8305	0.100482	Yes
AT5G46760	0.0643466	0.085055	0.113732	0.388592	0.58896	0.599902	AT5G46770	0.0530647	0.0443888	0	0.175579	0.208415	-12.3738	1.97343	0.247326	Yes
AT1G51770	0.0170207	0.0187487	0.030084	0.394024	1.13455	1.52575	AT1G51780	0.0752885	0.26831	0.134121	0.779043	5.55293	0.83295	6.20449	2.83346	Yes
AT4G31351	0.650245	0.814677	0.386026	1.13909	1.47162	0.369519	AT4G31354	1.45041	2.13164	2.38525	2.39425	4.84871	0.717676	1.74113	1.01802	Yes
AT4G13990	0.228645	0.290605	0.341955	0.654993	1.01489	0.631763	AT4G13992	0.320504	0.412487	0.405528	0.420072	0.840914	0.33945	1.39159	1.0013	Yes
AT3G63060	0	0.0296032	0.126669	0.139757	1.95628	3.80703	AT3G63052	0.542408	1.42351	1.2389	0.994861	17.3327	1.19159	4.99795	4.12284	Yes
AT5G15650	0.0502516	0.124545	0.166536	2.33294	5.37442	1.20396	AT5G15660	0.00473756	0.020431	0.0132923	1.36873	3.5997	1.48642	9.56648	1.39503	Yes
AT3G44860	0.0319783	0.140899	0.226086	4.7314	8.49453	0.844266	AT3G44870	0.0317484	0	0.00581428	1.7459	2.34822	-2.44699	6.20829	0.427595	Yes
AT2G42540	0	0.00968682	0.124347	1.20377	10.9188	3.18117	AT2G42530	0.606534	22.4346	180.478	74.1219	1004.91	8.217	10.6942	3.76102	Yes
AT4G22610	0.371303	0.904103	0.414491	2.8324	3.98568	0.492797	AT4G22600	0	0.021652	0.0473228	0.173353	0.132879	12.2086	13.6979	-0.383574	No
AT4G11560	0.284759	0.33212	0.177639	0.539505	1.12488	1.06005	AT4G11550	0.402212	0.586632	0.280099	0.710799	0.850505	-0.522004	1.08034	0.258875	Yes
AT5G45190	0.125629	0.415149	0.199844	0.657522	1.12488	0.774648	AT5G45180	0	0	0	0.110354	0.206005	0	14.3305	0.90048	Yes
AT2G25490	0.0119919	0	0.0105978	0.953522	1.01409	0.0888527	AT2G25482	0.0440843	0.0464605	0.0808073	0.262642	0.347661	0.874072	2.97906	0.40457	Yes
AT1G55170	0.123961	0.261218	0.161943	0.82455	1.23863	0.587059	AT1G55175	0	0.0887095	0.0387147	0.0778545	0.207231	11.919	14.339	1.41227	Yes
AT3G60770	0.0216247	0.0655051	0.0286661	0.96856	1.93089	0.995343	AT3G60760	0.0362957	0	0.0331436	1.39914	2.56671	-0.131031	6.14359	0.875375	Yes
AT5G13630	0.0270586	0.193736	0.0239129	0.776187	1.14411	0.559738	AT5G13620	0	0	0	0.058398	0.153694	0	13.9079	1.39592	Yes
AT3G45650	0.0200879	0.00737575	0	0.72787	1.49222	1.0357	AT3G45660	0.653996	0.179341	0.0610775	1.87044	3.51485	-3.42035	2.42609	0.910082	Yes
AT1G61280	0.191976	0.416523	0.318751	1.59264	1.38904	-0.197328	AT1G61290	0.0523392	0.223237	0.0741838	2.10064	1.99366	0.503131	5.25112	-0.0754092	No
AT3G26360	0.509447	1.40292	0.803969	1.62985	1.71964	0.0773651	AT3G26350	0.800235	1.59948	1.15713	2.54638	2.89546	0.53205	1.85528	0.185344	Yes
AT5G54980	0.108632	0.0854719	0.178292	0.187438	0.972688	2.3755	AT5G54990	0	0	0.0110801	0.111869	0.242987	10.1151	14.5687	1.119	Yes
AT1G24020	0.0164888	0.108977	0.0728597	0.580864	1.00067	0.784687	AT1G24010	0.0707228	0.0627586	0.0319281	0.182351	0.142729	-1.1471	1.01293	-0.353418	No
AT5G12010	0	0.015295	0.0368133	0.237586	1.72679	2.86151	AT5G12000	0	0.0026329	0	0.0234949	0.057125	0	12.4802	1.28141	Yes
AT4G33865	0	0.0447084	0.0179347	0.040852	0.242281	2.56791	AT4G33860	0.00328521	0.00682034	0.00593119	0.327883	0.975086	0.850382	8.20903	1.57232	Yes
AT5G48580	0	0.0622724	0.0333073	0.284505	0.487447	0.776771	AT5G48575	0	0.0298177	0	0.122735	0.151058	0	13.8829	0.299534	Yes
AT5G60310	0.0541171	0.0894168	0.0717387	0.803422	2.16707	1.43151	AT5G60320	0.0258682	0.0167738	0.0379777	0.113365	0.398192	0.553795	3.94369	1.8124	Yes
AT5G17050	0.0268292	0.118212	0.0632274	0.819117	1.36129	0.73283	AT5G17040	0.137932	0.408278	0.170193	0.507357	0.588266	0.303195	2.09243	0.213463	Yes
AT3G59750	0.114705	0.2527	0.10137	1.10833	0.707532	-0.647515	AT3G59740	0.0701245	0.152982	0.0806973	0.361492	0.52601	0.202575	2.90692	0.541114	No
AT1G32370	0.0827673	0.0569813	0	0.395703	0.41172	0.0572425	AT1G32375	0.0964443	0.16064	0.138796	0.511465	1.22703	0.525152	3.66919	1.26245	Yes
AT5G14970	0	0.12025	0.0643175	0.531076	0.669755	0.33471	AT5G14980	0.013838	0.067636	0.00646942	0.57535	1.10653	-1.09574	6.32023	0.943519	Yes
AT2G35635	0.0977114	0.408999	0.0863522	1.10149	1.22487	0.153167	AT2G35640	0.654115	0.31096	0.212326	2.4816	2.23946	-1.62322	1.77552	-0.148119	No
AT5G66250	0.0502516	0.0553533	0	0.531076	1.02489	0.948465	AT5G66260	0	0	0	0.28557	0.734806	0	16.1651	1.36349	Yes
AT4G32620	0.0148631	0.196465	0.157623	0.463756	0.961163	1.0514	AT4G32630	0.0119257	0.0987177	0.0153517	0.523279	1.3844	0.364055	6.85784	1.40359	Yes
AT5G18370	1.10963	1.6214	1.04067	2.32488	3.46958	0.577603	AT5G18362	1.8592	2.13896	1.55768	2.79016	4.31648	-0.255282	1.21517	0.629506	Yes
AT3G29200	0.0449057	0.148394	0.158741	0.372883	0.737154	0.983224	AT3G29195	0	0	0	0	0.640508	0	15.967	15.967	Yes
AT1G74840	0.210325	0.17124	0.137385	0.966429	1.70129	0.815886	AT1G74830	0.497176	0.458542	0.543832	1.15777	2.24031	0.129402	2.17185	0.952344	Yes
AT3G55200	0.063317	0.116242	0.0746083	0.361131	1.09188	1.59619	AT3G55210	0	0.143399	0.0529477	0.560353	1.16998	12.3706	16.8361	1.06206	Yes
AT5G19100	0.105528	0.13949	0.186521	0.828478	0.797913	-0.0542307	AT5G19097	0.11907	0.181875	0.107091	0.583157	0.519946	-0.152959	2.12646	-0.16552	No
AT2G36270	0	0.088062	0.211955	0.273584	1.00216	1.87302	AT2G36261	0	0	0	0.230277	0.617219	0	15.9135	1.42237	Yes
AT3G14020	0	0.0317601	0.025481	0.362757	0.458966	0.339379	AT3G14025	0.114802	0.0196683	0.152617	0.485402	1.06853	0.410737	3.2183	1.13836	Yes
AT1G12880	0	0.0854719	0.0822886	0.484216	1.01901	1.07343	AT1G12890	0.102213	0.242704	0.372697	0.935595	1.56492	1.86632	3.93631	0.742127	Yes
AT1G36622	0.446466	0.74514	0.478258	2.81879	3.43232	0.284109	AT1G36620	0.007254	0.0688734	0.0150332	0.165183	0.24955	1.05028	5.10248	0.595234	Yes
AT3G13100	0	0.10108	0	0.277083	1.02706	1.8901	AT3G13090	0.650517	1.05198	0.96473	1.42776	2.61465	0.568531	2.00694	0.87286	Yes
AT2G09990	0.0494664	0.12714	0.0582877	0.282134	0.377303	0.41933	AT2G09992	0	0	0	0.274387	0.882538	0	16.4294	1.68541	Yes
AT1G51660	0.0854096	0.52267	0.243215	1.73841	3.14399	0.854823	AT1G51670	0.773497	1.29825	1.02608	2.40847	4.26846	0.407671	2.46423	0.825596	Yes
AT1G20110	0.0218938	0.0241166	0.0483716	0.95858	2.70095	1.49449	AT1G20120	0.538456	0.333453	0.354452	0.882541	1.71451	-0.603224	1.67088	0.958053	Yes
AT2G02350	0.110437	0.473077	0.238573	1.06215	1.03768	-0.0336301	AT2G02340	0.0253262	0.0786629	0.061515	0.63659	0.778533	1.27997	4.9415	0.29039	No
AT3G63052	0.0206513	0.11374	0.182506	0.311786	3.07158	3.30031	AT3G63050	0.889886	1.26203	2.65185	1.24539	5.92277	1.5753	2.73457	2.24967	Yes
AT4G13930	0.204909	0.64328	0.497992	2.2068	1.99784	-0.143513	AT4G13918	0.78696	1.76343	1.58188	4.36768	3.94931	1.00727	2.32722	-0.145266	No
AT3G06510	0.244381	0.783103	0.834435	1.96777	3.8901	0.98324	AT3G06520	0.660014	1.36369	1.1502	2.10062	4.51967	0.801307	2.77563	1.1054	Yes
AT5G35690	0.0195423	0.0645788	0.0690818	1.21951	1.011	-0.270511	AT5G35688	0	0	0	4.09374	4.38904	0	18.7435	0.100486	No
AT5G11280	0.0614967	0.108384	0.108695	0.631349	1.10128	0.802661	AT5G11290	0.354845	0.276307	0.307158	0.977856	2.11175	-0.208202	2.57314	1.11074	Yes
AT1G64200	0.0890535	0.122618	0.137726	0.179266	0.753083	2.07064	AT1G64195	0.564505	0	0	0.517696	1.29509	-15.7847	1.19798	1.32286	Yes
AT3G43980	0.0436068	0.144101	0.0770747	0.263343	0.46276	0.813295	AT3G43970	0	0.0760836	0.132411	0.597423	0.534272	13.6928	15.7053	-0.161176	No
AT5G27930	0.0678203	0.194234	0.143846	0.395918	1.63286	2.0441	AT5G27927	0.0191024	0.00984402	0.00854387	0.140847	0.862115	-1.15986	5.49532	2.61367	Yes
AT5G54960	0.0486306	0.321406	0.279351	1.99459	2.09251	0.0691431	AT5G54950	0.506161	1.59406	1.23318	4.17771	6.63565	1.2847	3.71254	0.667524	Yes
AT3G13110	0.30662	0.464404	0.203231	1.77454	2.6692	0.588962	AT3G13100	1.07948	1.76954	1.58008	3.20535	4.03576	0.549657	1.90249	0.332358	Yes
AT1G61870	0.247332	0.484341	0.242866	1.71493	2.00955	0.228718	AT1G61860	0.556681	0.825964	0.721947	1.97023	3.142	0.375036	2.49674	0.673316	Yes
AT1G63880	0.0479674	0.0264186	0.148369	0.869033	1.4078	0.695955	AT1G63870	0.050996	0.0390537	0.0268776	0.253686	0.23131	-0.923726	2.18115	-0.133211	No
AT1G09160	0.0479674	0.0528372	0.0211955	0.531076	1.02602	0.950063	AT1G09157	0.110609	0.150544	0.0501479	1.80571	2.68603	-1.14105	4.60181	0.572907	Yes
AT5G06530	0	0.217565	0.0748078	0.283998	4.98275	4.13294	AT5G06520	0.00918318	0.107748	0.159295	0.480094	11.8312	4.11508	10.3297	4.62311	Yes
AT2G34585	0	0.0191818	0.030779	0.0175272	0.259873	3.88937	AT2G34580	0.0304237	0.0906005	0.0753547	0.183981	0.285401	1.30822	3.2293	0.633406	Yes
AT1G76970	0.0436068	0.0160113	0.0770747	0.83392	1.1569	0.472277	AT1G76965	0.0526259	0.0140235	0.0123822	0.359466	1.23013	-2.08661	4.54663	1.77486	Yes
AT1G67630	0.390846	1.17199	0.805954	0.808634	1.10173	0.446211	AT1G67626	0.601697	0.877296	0.658889	0.792881	1.40527	0.130996	1.22372	0.825663	Yes
AT2G32060	0	0.0875315	0	0.623854	0.790577	0.341692	AT2G32050	0.0501675	0.0719747	0.0619135	0.698198	1.04916	0.303446	4.38606	0.58752	Yes
AT1G68530	0.0155647	0.0342896	0	0.422981	2.98861	2.82078	AT1G68526	0.0682722	0.143341	0.187126	1.00178	4.36328	1.45451	5.99776	2.12284	Yes
AT1G73060	0.160432	0.530157	0.315069	2.4939	3.51144	0.493657	AT1G73066	0.318286	0.569049	0.307393	2.92621	4.33986	-0.0502378	3.76921	0.568614	Yes
AT3G27080	0	0	0.0353259	0.40233	0.795368	0.983226	AT3G27070	1.16122	1.18598	0.693268	1.66844	3.05649	-0.744148	1.39623	0.873372	Yes
AT1G10410	0.0563319	0.22752	0.215727	0.926075	2.61537	1.49781	AT1G10400	0.698512	0.474569	0.294833	2.81693	4.72338	-1.24436	2.75745	0.745694	Yes
AT1G19000	0.13082	0.0240169	0.0192687	0.263343	0.954442	1.85767	AT1G18990	0.773567	0.14616	0.157697	0.417983	2.74208	-2.2943	1.82566	2.71373	Yes
AT5G59160	0.0176469	0	0.0311908	0.550613	1.14118	1.0514	AT5G59170	0.200214	0.253731	0.21349	0.80551	1.29437	0.0926212	2.69257	0.684269	Yes
AT1G70900	0.0189119	0.312478	0.30084	0.704294	2.61531	1.89272	AT1G70910	0.263196	0.39211	0.281305	1.14462	3.57812	0.0959941	3.76494	1.64432	Yes
AT2G02060	0.178107	0.95642	1.25921	1.54617	2.81299	0.863399	AT2G02061	0.317028	1.36388	1.5574	1.66421	3.25959	2.29642	3.36197	0.969849	Yes
AT5G20380	0.0198362	0.1311	0.0701206	0.658853	1.97347	1.58269	AT5G20370	0.0369286	0.117907	0.068108	1.41236	4.31606	0.882907	6.86845	1.6116	Yes
AT5G57990	0.18017	0.198462	0.136479	0.518123	1.43399	1.46865	AT5G57980	1.21966	1.41252	1.23788	1.13852	2.64544	0.0213923	1.11702	1.21634	Yes
AT5G67270	0.0226456	0.0997784	0.0600389	0.205136	1.19408	2.54118	AT5G67265	0.275738	0.144731	0.251922	1.13793	2.44003	-0.130316	3.14548	1.10048	Yes
AT1G06550	0.113228	0.249446	0.500324	1.16244	1.8925	0.703131	AT1G06540	0.228861	0.539388	0.649755	1.12934	3.74425	1.50538	4.03207	1.72919	Yes
AT1G16080	0.0228416	0.503211	0.383538	1.14951	2.11341	0.87854	AT1G16090	0.68711	1.47654	1.29082	3.03374	3.88644	0.909665	2.49982	0.357351	Yes
AT5G06760	0	0.0569813	0.205721	0.0260331	1.28662	5.62656	AT5G06755	0	0.0413376	1.25685	0.114093	2.54083	16.9395	17.9549	4.4769	Yes
