# Supplementary material for: Dehydration stress extends mRNA 3′ untranslated regions with noncoding RNA functions in Arabidopsis
Source: HighWire-hosted journal article supplement (doi:10.1101/gr.218669.116), 2017-05-18
Supplement: Supplemental_Table_S6.xlsx [file Supplemental_Table_S6.xlsx]

## Sheet: Supplemental Table 6
Supplemental Table 6. Tabulated data of expression levels of 420 3' UTR extensions induced in fpa-7 mutant.
Column A: ID of gene exhibiting 3' UTR extensions of its mRNA;
Column B-E: expression levels (RPMs) of proximal and distal poly(A) sites in WT and fpa-7 mutant;
Column F-G: log2-transformed fold changes of expression levels of proximal and distal poly(A) sites in fpa-7 mutant relative to WT;
Column H-I: code for differentially expressed (DE) proximal and distal poly(A) sites in fpa-7 mutant relative to WT, "U" for up-regulated, "D" for down-regulated, "_" for not differentially expressed;
Column J-N: expression levels (FPKMs) of 3' UTR extensions in NC, ABA_1h, ABA_3h, Dehy_1h and Dehy_3h;
Column O-R: log2-transformed fold changes of expression levels of 3' UTR extensions in ABA_1h, ABA_3h, Dehy_1h and Dehy_3h relative to NC;
Column S-V: up-regulated 3' UTR extensions in ABA_1h, ABA_3h, Dehy_1h and Dehy_3h relative to NC.
Gene ID	WT_proximal	fpa-7_proximal	WT_distal	fpa-7_distal	logFC_proximal(fpa-7/WT)	logFC_distal(fpa-7/WT)	DE_proximal	DE_distal	NC	ABA_1h	ABA_3h	Dehy_1h	Dehy_3h	logFC(ABA_1h/NC)	logFC(ABA_3h/NC)	logFC(Dehy_1h/NC)	logFC(Dehy_3h/NC)	Up.ABA_1h	Up.ABA_3h	Up.Dehy_1h	Up.Dehy_3h
AT4G31150	7.63124	5.97914	0	2.03994	-0.35198	17.6382	_	U	0.0180329	0.0178772	0.0063746	0.0635258	0.0789388	-0.0124974	-1.49876	1.81614	2.12949	No	No	Yes	Yes
AT5G49610	11.238	6.61222	0	1.44203	-0.765183	17.1377	_	U	0.0205842	0.00755799	0.0121275	0.207182	0.436884	-1.44426	-0.762769	3.33066	4.40697	No	No	Yes	Yes
AT3G49910	390.636	281.371	0	1.30134	-0.47335	16.9897	_	U	0.0403966	0.0547665	0.030208	0.272106	0.494646	0.438965	-0.419182	2.75156	3.61376	No	No	Yes	Yes
AT2G21230	12.5289	9.84799	0	1.16066	-0.347358	16.8246	_	U	0.00820594	0.0451951	0.0580158	0.198224	0.253083	2.45999	2.8202	4.59264	4.9451	No	No	Yes	Yes
AT2G36010	1.67052	3.62265	0	1.09031	1.11674	16.7344	U	U	0	0	0.00620908	0.0282863	0.0698992	0	9.28056	11.4664	12.7713	No	No	No	Yes
AT2G17695	51.1027	26.062	0	1.01997	-0.971452	16.6382	_	U	0.16598	0.230944	0.177565	1.52992	1.59916	0.476509	0.0973342	3.2043	3.26816	No	No	Yes	Yes
AT1G51630	29.1202	32.5336	0	1.01997	0.159907	16.6382	_	U	0.0139128	0.0344818	0.0153692	0.658156	1.59871	1.30881	0.143535	5.56293	6.84332	No	No	Yes	Yes
AT5G39590	58.4303	49.2048	0	0.984799	-0.247917	16.5876	_	U	0.0620755	0.043513	0.0299231	0.579355	0.510907	-0.512479	-1.05251	3.22214	3.04076	No	No	Yes	Yes
AT1G69960	22.552	19.1332	0	0.914457	-0.237176	16.4806	_	U	0.0196881	0.0216869	0.00869966	0.478893	0.39991	0.139431	-1.17737	4.6036	4.34358	No	No	Yes	Yes
AT4G39710	85.1966	58.9824	1.36679	3.83368	-0.530509	1.48793	_	U	0.110849	0.0244206	0.0587775	0.100413	0.110282	-2.18197	-0.915145	-0.142631	-0.0073976	No	No	No	No
AT5G05640	1.13899	0.703428	0	0.879285	-0.695274	16.4241	_	U	0.0298103	0.0875645	0.0175632	0.240034	0.306464	1.55422	-0.76292	3.00893	3.3614	No	No	Yes	Yes
AT3G12210	8.20074	6.01431	0	0.844114	-0.447354	16.3652	_	U	0.0075947	0.0062743	0.00503385	0.0324875	0.0566689	-0.27514	-0.592367	2.09537	2.89785	No	No	No	Yes
AT5G10745	13.592	12.732	0	0.7386	-0.0942892	16.1725	_	U	0.0119919	0	0.0423911	0.410377	0.46529	-10.229	1.82084	5.09565	5.27683	No	No	Yes	Yes
AT1G28310	13.0225	11.7121	0	0.7386	-0.153006	16.1725	_	U	0.0160622	0.0884641	0.0780718	0.258667	0.51136	2.46069	2.28042	4.00852	4.99173	No	No	Yes	Yes
AT2G19350	22.7419	23.8462	0	0.7386	0.0684099	16.1725	_	U	0	0	0.00655839	0.0448165	0.0738316	0	9.3594	12.1301	12.8502	No	No	No	Yes
AT4G27540	12.8326	10.7976	0	0.633085	-0.249104	15.9501	_	U	0.0395237	0.0544203	0.0785902	0.149179	0.540672	0.461327	0.991449	1.91598	3.77362	No	No	No	Yes
AT3G61620	8.96007	7.03428	0	0.597914	-0.349106	15.8677	_	U	0.026005	0.0401031	0.0137891	0.573216	0.783922	0.624731	-0.914769	4.46169	4.91331	No	No	Yes	Yes
AT1G76050	16.5913	17.3395	0	0.562743	0.063635	15.7802	_	U	0.179715	0.126694	0.057176	0.470299	0.479171	-0.504324	-1.65205	1.38782	1.41478	No	No	Yes	Yes
AT3G58790	13.2882	12.521	0	0.562743	-0.085797	15.7802	_	U	0.00526064	0	0.00464907	0.0847179	0.261686	-9.04183	-0.177935	4.00679	5.63377	No	No	Yes	Yes
AT5G17190	42.4844	35.5935	0	0.562743	-0.25532	15.7802	_	U	0.0103561	0.0171112	0.0137282	0.0938112	0.180304	0.723912	0.406326	3.17804	4.12057	No	No	Yes	Yes
AT3G07440	9.2638	8.93354	0.0379664	0.633085	-0.0523719	4.05925	_	U	0.020611	0.045407	0	0.248942	0.246067	1.13912	-11.0099	3.59368	3.57692	No	No	No	No
AT2G27450	16.2116	8.89837	0	0.562743	-0.865417	15.7802	_	U	0	0.0353856	0.0124205	0.319292	0.297627	11.7894	10.2797	14.9626	14.8613	Yes	No	Yes	Yes
AT4G10650	2.50578	1.19583	0	0.527571	-1.06724	15.6871	D	U	0.0209937	0.023125	0.049475	0.260607	0.368992	0.139435	1.23635	3.63322	4.13491	No	No	Yes	Yes
AT3G03320	8.04887	5.31088	0	0.527571	-0.599834	15.6871	_	U	0.0169478	0.0497824	0.00998505	0.153523	0.3035	1.55398	-0.762664	3.17853	4.16172	No	No	Yes	Yes
AT3G19910	9.83329	11.7121	0	0.527571	0.25225	15.6871	_	U	0.00386834	0	0.0136745	0.112912	0.219368	-8.5993	1.81904	4.86374	5.82183	No	No	Yes	Yes
AT5G51880	42.1427	31.3377	0	0.527571	-0.427382	15.6871	_	U	0.0480298	0.0604639	0.0394143	0.300413	0.419818	0.332082	-0.285144	2.64469	3.1275	No	No	Yes	Yes
AT3G15570	16.3255	14.7016	0	0.527571	-0.151153	15.6871	_	U	0.323936	0.168118	0.132128	0.307234	0.796401	-0.94619	-1.29371	-0.0763691	1.29776	No	No	No	Yes
AT4G16360	37.7386	28.8757	0	0.527571	-0.386183	15.6871	_	U	0.213244	0.220839	0.0499322	0.579689	0.594754	0.0504914	-2.09424	1.44273	1.47975	No	No	Yes	Yes
AT3G13782	1.10102	0.984799	2.46781	9.91834	-0.160944	2.00686	_	U	0.496762	0.754241	0.450877	0.702695	0.574365	0.602461	-0.139818	0.500336	0.209409	No	No	No	No
AT4G30580	37.0172	40.7285	0.265765	1.19583	0.137842	2.16975	_	U	1.02727	0.951537	0.639618	2.1149	1.53302	-0.110478	-0.683521	1.04177	0.57756	No	No	Yes	No
AT3G44100	61.0879	43.8587	0	0.4924	-0.478022	15.5876	_	U	0	0.0309154	0.00620082	0.141244	0.286206	11.5946	9.27864	13.786	14.8048	No	No	Yes	Yes
AT1G32130	20.8435	18.7464	0	0.4924	-0.15299	15.5876	_	U	0.0372892	0.123225	0.159279	0.425361	0.612124	1.72419	2.09443	3.51151	4.03663	No	Yes	Yes	Yes
AT1G25425	7.59328	8.75768	0	0.4924	0.205826	15.5876	_	U	0	0.0698149	0.074683	0.180746	0.430884	12.7695	12.8668	14.1418	15.395	Yes	Yes	Yes	Yes
AT2G17840	33.0307	58.9121	0	0.4924	0.834754	15.5876	_	U	0.0100719	0.0166416	0.00445051	2.73711	3.30673	0.723896	-1.17649	8.08475	8.3575	No	No	Yes	Yes
AT1G03090	56.6838	66.4388	0	0.4924	0.229089	15.5876	_	U	0.0461739	0.0184951	0.00556446	1.10271	1.80619	-1.31947	-3.05049	4.57753	5.28942	No	No	Yes	Yes
AT3G50340	9.11193	10.5514	0.0379664	0.633085	0.211609	4.05925	_	U	0.0601873	0	0.0531903	0.262509	0.279437	-12.5555	-0.178263	2.12465	2.21481	No	No	No	No
AT4G01590	22.4381	18.3946	0	0.457228	-0.286666	15.4807	_	U	0	0.0225275	0.0361474	0.370518	0.569705	11.1381	11.8201	15.1773	15.798	No	No	Yes	Yes
AT5G11890	9.75736	12.1341	0	0.457228	0.314508	15.4807	_	U	0.017187	0.0757276	0.045567	0.121092	0.359081	2.13885	1.40615	2.81599	4.38412	No	No	No	Yes
AT2G43235	15.4523	13.1541	0	0.457228	-0.23231	15.4807	_	U	0	0.0131793	0.0317212	0.156553	0.511849	10.3652	11.6317	13.9345	15.6435	No	No	Yes	Yes
AT3G21530	3.91054	3.58748	0	0.457228	-0.124394	15.4807	_	U	0.0185354	0.0340286	0.0491419	0.0932803	0.135231	0.87611	1.40618	2.33066	2.8664	No	No	No	Yes
AT2G01860	14.4652	24.3386	1.48069	3.79851	0.750661	1.35916	_	U	1.14085	1.07186	0.763579	1.30869	1.61906	-0.0899823	-0.579251	0.198018	0.505048	No	No	No	No
AT1G04130	6.30242	2.9544	0	0.457228	-1.09304	15.4807	D	U	0.0248888	0.0137078	0.0164965	0.0438388	0.383803	-0.860029	-0.593037	0.816463	3.94626	No	No	No	Yes
AT1G42990	40.624	42.3815	0	0.457228	0.061103	15.4807	_	U	0.167505	0.784171	0.491679	3.81748	4.50546	2.22689	1.55345	4.51026	4.74931	Yes	Yes	Yes	Yes
AT5G50460	70.8832	72.1366	0.227798	1.01997	0.0252862	2.16265	_	U	0.256904	0.0435363	0.0523935	0.258576	0.275251	-2.56067	-2.29355	0.00935799	0.0995132	No	No	No	No
AT1G43245	2.24002	3.16543	0.113899	1.30134	0.498889	3.51406	_	U	0.0415466	0.091529	0.055075	0.156814	0.165336	1.13931	0.406583	1.91599	1.99234	No	No	No	No
AT3G04030	4.89766	4.04471	0	0.422057	-0.276056	15.3652	_	U	0.0111848	0.00308007	0.0123556	0.0703598	0.178041	-1.85711	0.143511	2.65213	3.99139	No	No	Yes	Yes
AT3G22950	24.4503	19.485	0	0.457228	-0.327494	15.4807	_	U	0.00392007	0.0172722	0.0138574	0.153878	0.327602	2.13666	1.81907	5.29118	6.38129	No	No	Yes	Yes
AT4G26610	18.8693	14.561	0	0.457228	-0.373934	15.4807	_	U	0.0492203	0.0487955	0.026099	0.297244	0.26443	-0.0125018	-0.915001	2.59408	2.42532	No	No	Yes	Yes
AT1G79390	22.6659	20.4346	0	0.457228	-0.149512	15.4807	_	U	0.0964806	0.132254	0.0663168	0.612863	0.541794	0.45496	-0.540797	2.66713	2.48931	No	No	Yes	Yes
AT4G01935	20.0083	18.4298	0.0759328	1.37168	-0.118555	4.1749	_	U	0.563501	0.394997	0.347086	0.67029	0.849422	-0.512567	-0.699111	0.250362	0.592055	No	No	No	No
AT5G54500	136.261	150.498	0	0.457228	0.143372	15.4807	_	U	0	0	0	0.0116492	0.0127941	0	0	10.1873	10.3224	No	No	No	Yes
AT1G07050	0.911193	7.42117	0	0.422057	3.0258	15.3652	U	U	0	0.0185098	0.0148504	0.0845662	0.351076	10.8549	10.5373	13.046	15.0995	No	No	No	Yes
AT3G18773	27.5256	26.8006	0.113899	0.949628	-0.0385093	3.05949	_	U	0.127735	0.0432931	0.0434173	0.267021	0.166183	-1.56072	-1.55659	1.06375	0.379599	No	No	No	No
AT1G78180	18.7934	7.03428	2.84748	13.0838	-1.41775	2.20002	D	U	1.78275	1.75514	1.49471	2.28731	2.99503	-0.0225209	-0.254242	0.359543	0.748464	No	No	No	No
AT1G16040	10.0991	9.00388	0	0.422057	-0.165602	15.3652	_	U	0	0	0	0.0509425	0.26436	0	0	12.3149	14.6903	No	No	No	Yes
AT3G63180	6.49225	4.71297	0	0.422057	-0.462082	15.3652	_	U	0.123213	0.0558855	0.0448367	0.693024	1.12488	-1.14047	-1.4582	2.49165	3.19044	No	No	Yes	Yes
AT2G03420	55.2411	48.5717	0	0.422057	-0.185625	15.3652	_	U	0	0.0689726	0	0.764682	1.74012	12.752	0	16.2226	17.4088	Yes	No	Yes	Yes
AT3G13620	5.73292	5.76811	0	0.422057	0.0088279	15.3652	_	U	0.10064	0.0316735	0.0127058	0.332827	0.90828	-1.66754	-2.98466	1.72547	3.1738	No	No	Yes	Yes
AT2G33450	160.977	170.3	0	0.422057	0.0812195	15.3652	_	U	0.0658523	0.0453361	0	0.40597	0.909028	-0.538474	-12.6852	2.62388	3.78681	No	No	Yes	Yes
AT4G37200	92.7139	72.8048	0	0.422057	-0.348752	15.3652	_	U	0.0321733	0.0442995	0.0106624	0.218583	0.300082	0.461304	-1.59243	2.76386	3.22102	No	No	Yes	Yes
AT4G20030	20.0462	20.4346	0	0.422057	0.0276809	15.3652	_	U	0.0119174	0.0328181	0.00526597	0.512783	0.509826	1.46066	-1.17677	5.42603	5.41768	No	No	Yes	Yes
AT5G41910	8.65633	7.1398	0.0379664	1.37168	-0.277873	5.17471	_	U	0.00569193	0.00626979	0.0352116	0.120308	0.209524	0.139266	2.62694	4.39926	5.19959	No	No	Yes	Yes
AT5G12980	8.77023	7.6322	0	0.422057	-0.200517	15.3652	_	U	0.0216327	0.0346603	0.0225938	0.128662	0.223047	0.679817	0.0626851	2.57174	3.36546	No	No	Yes	Yes
AT5G54440	8.84617	9.39077	0	0.422057	0.0861903	15.3652	_	U	0.00412811	0.0477457	0.0133768	0.130189	0.047915	3.52863	1.69376	4.9756	3.53373	Yes	No	Yes	Yes
AT1G26220	47.5339	36.7189	0	0.422057	-0.372432	15.3652	_	U	0.0351563	0.066949	0.0284363	0.154735	0.18496	0.929086	-0.305953	2.13763	2.39503	No	No	Yes	Yes
AT1G06110	39.6749	20.7511	0.0379664	5.9088	-0.935035	7.28162	_	U	0.00903496	0.0132696	0.0133077	0.036375	0.0808987	0.554027	0.558159	2.00816	3.16111	No	No	No	Yes
AT5G10700	5.65699	1.79374	0.41763	3.13026	-1.65706	2.90595	D	U	0.980668	0.95107	0.471012	1.04069	1.32561	-0.0442128	-1.05798	0.0857084	0.43482	No	No	No	No
AT3G24350	19.8564	21.7359	0.0379664	0.773771	0.130476	4.34875	_	U	0	0.0137727	0.0662988	0.0251695	0.0497576	10.4286	12.695	11.298	12.281	No	No	No	No
AT5G64170	95.4854	64.8561	0.0379664	5.48674	-0.558039	7.17471	_	U	0.05378	0.0921509	0.0633706	0.0781878	0.184295	0.776817	0.236702	0.539789	1.77668	No	No	No	Yes
AT2G38350	0.227798	0.914457	0.0379664	3.34128	2.00511	6.45916	_	U	0.0184061	0.0337912	0.0216885	0.0432271	0.128184	0.876108	0.236624	1.2313	2.79929	No	No	No	Yes
AT1G50320	147.272	47.5869	0.0759328	6.29568	-1.62984	6.37331	_	U	0.0794941	0.145941	0.0497623	0.703433	0.629404	0.876382	-0.675686	3.14533	2.98491	No	No	Yes	Yes
AT4G24520	44.8383	43.3312	0.0379664	2.25097	-0.0493261	5.88931	_	U	0.115279	0.158728	0.0912653	0.210303	0.289113	0.461393	-0.336959	0.867283	1.32643	No	No	No	Yes
AT2G31590	0.0759328	2.32131	0.0379664	2.2158	4.93389	5.86659	U	U	0.0156338	0.0774946	0	0.21243	0.4044	2.30869	-10.6114	3.76339	4.69215	No	No	Yes	Yes
AT4G14605	15.0727	10.4459	0.0379664	2.00477	-0.528995	5.7222	_	U	0.0437423	0.0963663	0.0434893	0.242148	0.223033	1.13932	-0.0083677	2.46852	2.34989	No	No	Yes	Yes
AT1G29530	22.8937	11.079	0.0379664	1.82891	-1.04712	5.58975	D	U	0.0315324	0	0.00928888	0.169267	0.219598	-11.6231	-1.76216	2.42402	2.79956	No	No	No	Yes
AT4G31720	27.5256	24.9014	0.0379664	1.7234	-0.144551	5.50402	_	U	0.00275243	0.0181912	0.0109461	0.0941918	0.24919	2.72002	1.98772	5.09174	6.49522	No	No	Yes	Yes
AT5G45930	55.279	33.5887	0.645428	2.07511	-0.718757	1.68485	_	U	1.26119	1.37033	1.17523	1.70117	1.68152	0.119735	-0.101842	0.431735	0.414978	No	No	No	No
AT4G20850	48.7488	43.0498	0.0379664	0.703428	-0.179361	4.21125	_	U	0	0	0.0225267	0.0513116	0.0507191	0	11.1381	12.3254	12.3086	No	No	No	No
AT1G21210	0.911193	1.231	0.151866	6.57705	0.433997	5.43648	_	U	0.106467	0.0894474	0.0637896	0.34509	0.416507	-0.251265	-0.738919	1.69648	1.96784	No	No	Yes	Yes
AT2G22450	7.70717	11.079	0.189832	7.386	0.523552	5.28192	_	U	0.00348969	0.0691916	0.0246721	0.203719	0.243029	4.3055	2.81816	5.86328	6.11782	Yes	No	Yes	Yes
AT5G35100	109.609	78.0805	0.0759328	1.82891	-0.489331	4.58994	_	U	0.032537	0.173228	0.0479241	0.61131	0.965722	2.41216	0.558529	4.23133	4.89103	Yes	No	Yes	Yes
AT2G24420	62.151	56.9073	0.0759328	2.7082	-0.127162	5.15628	_	U	0	0.00892794	0.0143257	0.122368	0.6209	9.8038	10.4854	13.5791	15.9221	No	No	Yes	Yes
AT4G23890	183.909	139.49	0.0759328	2.7082	-0.398834	5.15628	_	U	0.00716905	0.0157937	0.0105594	0.0505099	0.057059	1.1384	0.558026	2.81499	2.99084	No	No	Yes	Yes
AT2G02710	85.766	93.4856	0.0759328	2.2158	0.124337	4.86678	_	U	0.00560129	0.0308497	0.0346509	0.22551	0.930631	2.45932	2.6269	5.32878	7.37375	No	No	Yes	Yes
AT4G20890	41.0796	34.468	0.0759328	2.14546	-0.253166	4.82023	_	U	0.00734877	0.0097138	0.0103911	0.0769246	0.247118	0.402056	0.499203	3.3861	5.06965	No	No	Yes	Yes
AT2G37920	46.0912	42.3815	0.0379664	1.05514	-0.121055	4.7962	_	U	0.0218938	0.0643108	0.0128991	0.190982	0.159734	1.5541	-0.762798	3.12425	2.8665	No	No	Yes	Yes
AT1G02010	10.0611	6.19017	0.0379664	0.984799	-0.700735	4.69667	_	U	0.0796055	0.141649	0.12086	0.258861	0.351316	0.831297	0.60233	1.70111	2.14169	No	No	Yes	Yes
AT2G01320	42.864	32.0763	0.0759328	1.82891	-0.418259	4.58994	_	U	0	0.059106	0.0316137	0.252036	0.284715	12.5293	11.6268	14.6214	14.7973	No	No	Yes	Yes
AT4G23860	27.146	23.6352	0.0379664	0.703428	-0.199801	4.21125	_	U	0	0.0537162	0.0258578	0.0588993	0.048516	12.3914	11.3369	12.5243	12.2445	No	No	No	No
AT5G16110	157.523	179.339	0.0379664	0.914457	0.187131	4.58976	_	U	0	0.0124723	0.0300194	0.524238	1.35178	10.2857	11.5522	15.678	17.0445	No	No	Yes	Yes
AT4G27700	224.761	181.027	0.0759328	1.68823	-0.312185	4.47446	_	U	0.0335543	0.0184804	0.0148268	0.303954	0.567506	-0.860151	-1.17775	3.1789	4.07966	No	No	Yes	Yes
AT1G01630	35.1569	28.102	0.0379664	0.914457	-0.323136	4.58976	_	U	0.0487992	0.120945	0.107815	0.239444	0.248817	1.30925	1.14347	2.29453	2.34992	No	No	Yes	Yes
AT2G14910	262.158	245.918	0.113899	2.42683	-0.0922556	4.41312	_	U	0.0104899	0.0115549	0	0.580699	0.814027	0.139372	-10.0362	5.78937	6.27665	No	No	Yes	Yes
AT5G41240	7.25158	7.03428	0.0379664	0.844114	-0.0438919	4.47428	_	U	0.0142799	0.039324	0.0126198	0.10061	0.177586	1.46078	-0.178162	2.81585	3.63553	No	No	No	Yes
AT1G28150	146.968	204.17	0.0379664	0.773771	0.47427	4.34875	_	U	0	0.0599185	0.0320482	0.20075	0.432943	12.549	11.6465	14.2932	15.4019	No	No	Yes	Yes
AT2G29390	24.2605	14.4203	0.0759328	1.58271	-0.750511	4.38135	_	U	0.0142683	0.0880144	0.176534	0.132123	0.195895	2.62408	3.62813	3.21009	3.77826	Yes	Yes	Yes	Yes
AT3G46220	6.75802	4.4316	0.0759328	1.4772	-0.608772	4.28182	_	U	0.148271	0.123901	0.0677764	0.648406	0.996985	-0.259032	-1.12927	2.12858	2.74925	No	No	Yes	Yes
AT5G63390	2.20205	2.81371	0.41763	8.89837	0.353626	4.41321	_	U	0.130604	0.201409	0.0769475	0.166509	0.216561	0.624887	-0.76318	0.350371	0.729523	No	No	No	No
AT2G45540	5.96072	4.50194	0.0379664	0.773771	-0.404939	4.34875	_	U	0.424756	0.670626	0.375377	1.0403	1.41331	0.65886	-0.17829	1.29227	1.73434	No	No	Yes	Yes
AT2G37660	242.263	233.081	0.0379664	0.773771	-0.055746	4.34875	_	U	0.0247802	0.0682399	0.0782123	0.215566	0.232447	1.46106	1.65781	3.12035	3.22912	No	Yes	Yes	Yes
AT5G17510	17.2367	11.9231	0.151866	3.02474	-0.531726	4.31586	_	U	0.0513699	0.0646686	0.0259417	0.265907	0.394255	0.332086	-0.985374	2.3717	2.93989	No	No	Yes	Yes
AT5G23870	15.0347	16.5306	0.0759328	1.231	0.136841	4.01879	_	U	0.0100695	0.0221836	0.0444945	0.0304051	0.010018	1.13872	2.14253	1.59336	-0.00739091	No	No	No	No
AT1G76405	4.2902	3.48197	0.151866	2.9544	-0.301141	4.28191	_	U	0.00707295	0	0.0062507	0.135261	0.21814	-9.46821	-0.178027	4.25535	4.94483	No	No	Yes	Yes
AT4G00530	9.3777	5.1702	0.0759328	0.879285	-0.859013	3.53336	_	U	0.0258648	0.0949688	0.0533352	0.0607439	0.085775	1.87606	1.04381	1.23143	1.72918	No	No	No	No
AT3G06380	28.8544	25.7103	1.06306	3.37646	-0.166447	1.66728	_	U	0.900095	0.353284	0.292582	0.780993	0.988128	-1.34922	-1.6212	-0.204764	0.134619	No	No	No	No
AT1G30880	85.6901	92.6767	0.0759328	1.33651	0.113077	4.13743	_	U	0.0565147	0.0339557	0.0227021	0.243043	0.531588	-0.734801	-1.31542	2.10432	3.23338	No	No	Yes	Yes
AT1G55880	9.18786	10.1645	0.227798	1.65306	0.145743	2.85925	_	U	3.4154	1.18804	2.08387	0.383141	0.631194	-1.52346	-0.712782	-3.15607	-2.43588	No	No	No	No
AT1G28140	118.227	50.5765	0.0759328	1.44203	-1.22502	4.24705	D	U	0.0223037	0.0561555	0.06758	0.218075	0.386733	1.33175	1.59888	3.28889	4.11537	No	No	Yes	Yes
AT1G71500	272.409	240.186	0.265765	1.65306	-0.181624	2.63687	_	U	0	0.0103051	0.00826776	0.0376649	0.07446	10.0105	9.6931	11.8794	12.8624	No	No	No	No
AT3G17670	10.6306	7.6322	0.0379664	0.668257	-0.478051	4.13725	_	U	0.0521591	0.1264	0.0792842	0.688781	0.890473	1.27684	0.604019	3.7228	4.09332	Yes	No	Yes	Yes
AT1G77122	25.5514	7.98391	0.0759328	1.44203	-1.67823	4.24705	D	U	0.293707	0.405825	0.202641	0.959463	0.722822	0.466466	-0.535429	1.70782	1.29923	No	No	Yes	Yes
AT2G25560	6.94785	6.155	0.0379664	0.703428	-0.174808	4.21125	_	U	0.00771406	0.0254916	0.0136346	0.139757	0.153492	1.72316	0.820894	4.17752	4.31275	No	No	Yes	Yes
AT1G09870	10.213	10.0239	0.113899	2.03994	-0.0269636	4.16258	_	U	0	0.0174537	0.0210046	0.0558188	0.141876	10.7701	11.0372	12.4468	13.7924	No	No	No	Yes
AT3G49720	25.0198	25.6751	0.0379664	0.668257	0.0372986	4.13725	_	U	0.0151808	0.0310552	0.0229989	2.96424	2.72936	1.0321	0.59899	7.60833	7.48922	No	No	Yes	Yes
AT1G31170	123.808	59.8969	0.189832	3.30611	-1.04756	4.12227	D	U	1.14176	1.28744	1.18814	1.75439	2.00298	0.173246	0.0574501	0.619702	0.810885	No	No	No	No
AT1G48200	9.41566	8.23011	0.227798	1.51237	-0.194151	2.73093	_	U	0.00882344	0.0194384	0.0155954	0.0355234	0.0175566	1.13861	0.820996	2.00813	0.991789	No	No	No	No
AT1G78140	65.7957	47.7276	0.0759328	1.30134	-0.46317	4.09896	_	U	0.066162	0.148794	0.0925782	0.596558	1.43989	1.16912	0.484608	3.17239	4.4436	No	No	Yes	Yes
AT2G22425	29.6138	24.7958	0.0759328	1.26617	-0.25617	4.05943	_	U	0.0234855	0.0689863	0.0345921	0.409732	1.37077	1.55413	0.558474	4.12426	5.86647	No	No	Yes	Yes
AT5G25265	25.2097	17.1988	0.0759328	1.30134	-0.551668	4.09896	_	U	0.0359266	0.0395739	0.01905	0.132588	0.185863	0.139462	-0.914905	1.88353	2.37079	No	No	Yes	Yes
AT3G49470	127.339	75.9351	0.151866	2.53234	-0.745839	4.05952	_	U	0.0187107	0.0549607	0.0165355	0.364094	0.527425	1.55403	-0.178193	4.28165	4.81629	No	No	Yes	Yes
AT5G22620	37.0552	1.7234	3.53087	10.6921	-4.42634	1.59845	D	U	1.34678	2.02204	1.20652	2.61824	2.43199	0.586295	-0.158665	0.95908	0.852621	No	No	No	No
AT5G24990	2.54375	4.53711	0.0379664	0.633085	0.834816	4.05925	_	U	0.0645039	0.213157	0.0798072	0.272679	0.821427	1.72431	0.307089	2.07958	3.67047	No	No	Yes	Yes
AT1G09760	19.4768	17.7616	0.0379664	0.633085	-0.132995	4.05925	_	U	0.217137	0.131549	0.0863522	0.928836	1.98744	-0.722955	-1.3302	2.09677	3.19418	No	No	Yes	Yes
AT2G03620	15.4903	13.2596	0.0379664	0.633085	-0.224324	4.05925	_	U	0.00673872	0	0.0119106	0.0678257	0.227945	-9.39847	0.820777	3.32936	5.07799	No	No	No	Yes
AT1G76460	31.2463	27.1875	0.0379664	0.633085	-0.200743	4.05925	_	U	0.0154169	0.0467005	0.0170307	0.531463	0.912611	1.5983	0.143545	5.10648	5.8865	No	No	Yes	Yes
AT4G04470	38.8396	22.9318	0.0379664	0.633085	-0.760181	4.05925	_	U	0.0578555	0.070102	0.0562425	0.221281	0.218726	0.276959	-0.0407839	1.93517	1.91842	No	No	Yes	Yes
AT1G70520	21.9066	21.1028	0.0759328	1.19583	-0.0539281	3.97697	_	U	0.0618028	0.00850965	0.027309	1.25965	1.93683	-2.85904	-1.178	4.34899	4.96966	No	No	Yes	Yes
AT3G10840	12.9086	9.17974	0.0379664	0.597914	-0.491804	3.97679	_	U	0.0332547	0.128208	0.0685738	0.914878	1.04217	1.94653	1.04387	4.78153	4.96946	No	No	Yes	Yes
AT4G04350	22.1344	23.1428	0.0759328	1.19583	0.0642723	3.97697	_	U	0.0417816	0.0328738	0.0316494	0.216275	0.374111	-0.345835	-0.400577	2.37165	3.16222	No	No	Yes	Yes
AT2G31380	114.431	98.7965	0.0759328	1.16066	-0.211942	3.9339	_	U	0.0117254	0.0258315	0	1.14476	1.06155	1.13883	-10.1966	6.60805	6.49918	No	No	Yes	Yes
AT3G51180	1.55662	0.984799	0.0379664	0.597914	-0.660511	3.97679	_	U	0.0071788	0.0237228	0.00951636	0.361276	0.349962	1.72306	0.406175	5.65125	5.60534	No	No	Yes	Yes
AT1G15980	375.108	318.512	0.189832	2.9544	-0.235956	3.96	_	U	0.0109167	0.0521084	0.0192952	0.109878	0.452537	2.25393	0.821132	3.3301	5.37213	No	No	Yes	Yes
AT4G08790	3.79664	3.37646	0.0379664	0.597914	-0.169213	3.97679	_	U	0.0588448	0.0216063	0.00866732	0.0592278	0.0390292	-1.44504	-2.76184	0.00935677	-0.592236	No	No	No	No
AT1G70660	53.2668	40.7988	0.341697	5.24054	-0.384709	3.93888	_	U	0	0.00561013	0.0135029	0.0307573	0.0557372	9.13446	10.4001	11.5872	12.4447	No	No	No	Yes
AT1G28540	16.7052	13.1189	0.0379664	0.562743	-0.348647	3.88933	_	U	0.0121019	0.0333262	0.053475	0.535948	1.45082	1.46067	2.14271	5.46763	6.90431	No	No	Yes	Yes
AT1G10350	12.7567	13.6113	0.0379664	0.562743	0.0935529	3.88933	_	U	0.013358	0.0441425	0.0708307	0.524353	2.47188	1.72371	2.40579	5.29371	7.53069	No	No	Yes	Yes
AT4G10110	12.8706	13.541	0.0379664	0.562743	0.0732538	3.88933	_	U	0.129008	0.127894	0.136812	0.532374	0.821427	-0.0125034	0.0847334	2.0449	2.67058	No	No	Yes	Yes
AT5G64240	54.4818	48.5014	0.0379664	0.562743	-0.167748	3.88933	_	U	0.144164	0.0952802	0.0934302	0.435308	1.94105	-0.597416	-0.625699	1.59425	3.75095	No	No	Yes	Yes
AT4G35987	5.73292	5.59225	0.0759328	1.05514	-0.0358411	3.79639	_	U	0.0370709	0.0816687	0.0327613	0.65918	0.467162	1.13929	-0.178243	4.15195	3.65521	No	No	Yes	Yes
AT4G28040	36.6376	25.3586	0.0379664	0.703428	-0.530849	4.21125	_	U	0.0788833	0.164129	0.480244	0.326409	0.20056	1.05694	2.60582	2.04875	1.34613	No	Yes	Yes	No
AT1G62390	61.7333	54.5157	0.189832	1.33651	-0.179378	2.81561	_	U	5.86269	2.41734	0.616135	2.63943	1.403	-1.27814	-3.25022	-1.15133	-2.06304	No	No	No	No
AT1G78915	28.5507	15.5458	0.151866	2.2158	-0.877005	3.86687	_	U	0.1994	0.337912	0.153627	0.993194	0.818952	0.760957	-0.376212	2.31636	2.03806	No	No	Yes	Yes
AT3G59280	34.6633	17.5154	0.0759328	1.09031	-0.984788	3.8437	_	U	0	0.167014	0.0535979	0.122086	0.241353	14.0278	12.3882	13.5757	14.5589	Yes	No	No	Yes
AT2G38440	24.4883	21.1028	0.0759328	1.09031	-0.214656	3.8437	_	U	0.0245035	0.0899705	0.0360915	0.460375	0.877614	1.87604	0.558482	4.23119	5.16195	No	No	Yes	Yes
AT1G53450	12.1872	4.74814	0.189832	2.7082	-1.35993	3.83447	D	U	0.0631034	0.0641629	0.0428981	0.180771	0.210879	0.0240177	-0.556699	1.51822	1.74046	No	No	Yes	Yes
AT3G15730	69.9341	50.1896	0.265765	3.62265	-0.478607	3.76878	_	U	0.0839748	0.262084	0.292727	3.37146	5.04521	1.64188	1.8014	5.32711	5.90864	Yes	Yes	Yes	Yes
AT5G02940	63.7076	82.3714	0.189832	2.35648	0.370679	3.63377	_	U	0.0118305	0.0260632	0.0313656	1.27411	1.58895	1.13883	1.40591	6.74962	7.06821	No	No	Yes	Yes
AT2G05620	390.18	271.383	0.303731	4.07988	-0.523813	3.74762	_	U	0.0168576	0.018569	0	0.09332	0.134171	0.13942	-10.72	2.46809	2.99185	No	No	No	Yes
AT3G08890	9.60549	2.2158	0.113899	1.37168	-2.11603	3.59	D	U	0.275853	0.48488	0.394204	0.82999	1.07733	0.813706	0.515028	1.58916	1.96545	No	No	Yes	Yes
AT1G66510	3.56884	2.7082	0	0.422057	-0.39812	15.3652	_	U	0.0242408	0.0178012	0.0142818	0.0731957	0.136662	-0.445249	-0.762842	1.59392	2.49461	No	No	No	No
AT1G29240	1.93629	0.773771	0.151866	1.86408	-1.3233	3.61751	D	U	0.0216542	0.0596316	0.0813317	0.0908132	0.107717	1.461	1.90868	2.06774	2.314	No	Yes	Yes	Yes
AT1G75230	5.92275	4.78331	0.0759328	0.914457	-0.308258	3.58995	_	U	0.0246946	0.0272017	0.0145492	1.11849	1.7853	0.139445	-0.76285	5.50064	6.17525	No	No	Yes	Yes
AT2G31040	51.4444	60.53	0.265765	3.13026	0.234635	3.55801	_	U	0	0.0209068	0.0167734	0.305655	0.490954	11.0304	10.7128	14.8997	15.5833	No	No	Yes	Yes
AT5G56180	17.6164	14.6665	0.0759328	1.44203	-0.264397	4.24705	_	U	0.17645	0.163014	0.0704232	0.38957	0.294466	-0.114251	-1.32501	1.14258	0.738812	No	No	Yes	No
AT5G44572	96.6244	74.3875	2.69561	6.82325	-0.377327	1.33984	_	U	0.14774	0.0697451	0.0373041	0.106215	0.132986	-1.08278	-1.98536	-0.47603	-0.151777	No	No	No	No
AT1G60770	13.516	8.58182	0.0759328	0.879285	-0.655315	3.53336	_	U	0.00886793	0.0293047	0.0039185	0.0847936	0.20733	1.72333	-1.17624	3.25583	4.54563	No	No	Yes	Yes
AT4G00895	150.233	138.681	0.0759328	0.879285	-0.115433	3.53336	_	U	0.0373835	0.164715	0.0991127	1.07505	1.05732	2.1392	1.40643	4.84549	4.8215	Yes	No	Yes	Yes
AT1G73470	43.6613	28.8757	0.83526	9.35559	-0.596499	3.48552	_	U	0.194441	0.603601	0.445213	1.13865	1.89929	1.63421	1.19512	2.54987	3.28799	Yes	Yes	Yes	Yes
AT1G54780	516.191	233.608	0.455597	5.1702	-1.14381	3.50436	D	U	0.0445643	0.0392709	0.00787672	0.242214	0.345824	-0.182386	-2.49872	2.44205	2.95579	No	No	Yes	Yes
AT1G45160	25.931	18.9926	0.113899	1.26617	-0.449245	3.47453	_	U	0.180699	0.199044	0.2076	2.23706	3.77527	0.139491	0.200207	3.62987	4.38484	No	No	Yes	Yes
AT2G25110	39.523	34.5031	0.113899	2.14546	-0.195964	4.23534	_	U	0	0.0182197	0.00974508	0.0332963	0.0493677	10.8321	9.93001	11.7016	12.2696	No	No	No	No
AT2G07050	44.9522	44.6325	19.4388	39.5678	-0.0102964	1.02539	_	U	4.98105	3.56416	4.36046	4.01347	3.6933	-0.482886	-0.191969	-0.311597	-0.431537	No	No	No	No
AT4G15475	6.83395	7.1398	0.0759328	0.844114	0.0631634	3.47447	_	U	0.00612824	0.0405024	0.0433265	0.7741	1.15841	2.72247	2.81969	6.97857	7.56012	No	No	Yes	Yes
AT4G38980	13.6679	12.8727	0.0759328	0.844114	-0.0864725	3.47447	_	U	0.139773	0.230944	0	0.808923	1.39058	0.72442	-13.7709	2.53283	3.31444	No	No	Yes	Yes
AT3G50430	11.6177	9.03905	0.0759328	0.844114	-0.362082	3.47447	_	U	0.182276	0.126809	0.0763039	0.429688	0.553576	-0.523432	-1.25619	1.23712	1.6026	No	No	Yes	Yes
AT1G30910	28.3989	30.0716	0.0759328	0.808942	0.0825668	3.41307	_	U	0.0867356	0.0636942	0.0894278	0.509251	0.848538	-0.445404	0.0440928	2.55354	3.29013	No	No	Yes	Yes
AT5G66040	789.435	767.721	0.265765	2.88406	-0.0402373	3.43983	_	U	0.187107	0.185492	0.239765	0.414314	0.949365	-0.0125037	0.357741	1.14682	2.34304	No	No	No	Yes
AT1G35620	40.8898	29.7902	0.189832	1.89926	-0.456904	3.32257	_	U	0.0954012	0.0727522	0.0259417	0.118181	0.240933	-0.390969	-1.87833	0.308889	1.33646	No	No	No	No
AT5G07960	43.5474	32.2522	0.0759328	0.808942	-0.433191	3.41307	_	U	0.152204	0.139714	0.156929	0.40852	0.757129	-0.123527	0.0440949	1.42434	2.31445	No	No	No	Yes
AT5G01920	58.8099	55.6763	0.0759328	0.808942	-0.0789952	3.41307	_	U	7.23152	7.26252	5.67056	8.01829	6.50086	0.00617156	-0.350806	0.148996	-0.153669	No	No	No	No
AT4G34700	86.2596	75.3372	0.0759328	0.808942	-0.195324	3.41307	_	U	0	0	0	0.151375	0.224441	0	0	13.8859	14.4541	No	No	Yes	Yes
AT5G60850	110.71	93.2394	0.265765	2.81371	-0.247773	3.4042	_	U	0.0413142	0.136526	0.0782386	0.861364	1.61476	1.72422	0.921076	4.38158	5.28819	No	No	Yes	Yes
AT3G15210	39.5989	47.2704	0.189832	2.00477	0.255475	3.40057	_	U	0.0355714	0.069658	0.0663651	7.46688	5.54434	0.969375	0.89952	7.71324	7.28375	No	No	Yes	Yes
AT2G16510	112.077	67.0367	0.189832	1.9696	-0.741464	3.37504	_	U	0.0417108	0.0918908	0.0552927	0.440814	1.03744	1.13931	0.406583	3.40136	4.63613	No	No	Yes	Yes
AT3G56690	4.36613	3.79851	0.113899	1.19583	-0.200921	3.39207	_	U	0.164888	0.133194	0.233151	0.265538	0.514007	-0.307939	0.499752	0.687397	1.64024	No	No	No	Yes
AT4G18400	7.13768	5.73294	0.265765	2.77854	-0.31618	3.38606	_	U	0.0836052	0.133023	0.0656763	0.205698	0.683905	0.669949	-0.348173	1.29876	3.03198	No	No	No	Yes
AT4G16950	94.9539	110.755	0.151866	1.54754	0.222069	3.34903	_	U	0.00606485	0.126931	0.0428783	3.36348	3.82545	4.38516	2.81966	9.11289	9.29857	Yes	No	Yes	Yes
AT5G47090	7.51734	6.19017	0.189832	1.93443	-0.280244	3.34904	_	U	0.0455424	0.0788323	0.0977451	0.183355	0.34953	0.791442	1.10164	2.00912	2.93986	No	No	Yes	Yes
AT3G51650	3.72071	2.00477	0.455597	2.42683	-0.892136	2.41322	_	U	0.00667901	0.0441425	0.00590256	0.0537798	0.0465139	2.72263	-0.178011	3.00747	2.79811	No	No	No	No
AT5G45680	159.876	140.088	0.151866	1.54754	-0.190627	3.34903	_	U	0.0149262	0	0.0065955	0.195304	0.163349	-10.5446	-1.17708	3.70891	3.45116	No	No	Yes	Yes
AT5G03200	16.7052	14.4554	0.0759328	0.773771	-0.208684	3.34894	_	U	0.226751	0.79141	0.4278	1.67708	2.84143	1.80327	0.915798	2.88672	3.64738	Yes	No	Yes	Yes
AT5G66290	24.6022	15.2644	0.493563	4.924	-0.688618	3.3185	_	U	0.463715	0.879293	0.579584	2.5537	3.0185	0.92309	0.321773	2.46125	2.7025	No	No	Yes	Yes
AT1G19750	0.493563	1.19583	1.21492	12.2396	1.27669	3.33261	_	U	0.0748049	0.0617995	0.0708307	0.23932	0.25782	-0.275498	-0.0787481	1.6776	1.78502	No	No	Yes	Yes
AT4G21470	31.8538	27.082	0.189832	1.86408	-0.234132	3.2956	_	U	0.0322224	0.208525	0.0925485	2.39187	3.81886	2.69371	1.52185	6.21349	6.88849	Yes	No	Yes	Yes
AT4G25980	25.1337	27.7151	0.455597	4.50194	0.141045	3.30469	_	U	0.237371	0.256489	0.229755	0.566572	0.899645	0.111749	-0.0470481	1.25508	1.92217	No	No	Yes	Yes
AT1G64720	1877.06	1987.01	0.341697	3.34128	0.0821251	3.28957	_	U	0.924889	0.70981	0.194292	4.21198	7.44423	-0.381843	-2.25099	2.18713	3.00876	No	No	Yes	Yes
AT5G49840	19.7425	14.1389	0.151866	1.44203	-0.481635	3.24715	_	U	0.0878671	0.179057	0.0737697	0.875545	0.638149	1.02694	-0.252264	3.31664	2.86036	No	No	Yes	Yes
AT1G72180	36.2959	40.3768	0.379664	3.58748	0.153721	3.24014	_	U	0.523487	0.814608	0.580124	1.78977	2.49658	0.637942	0.148204	1.77353	2.2537	No	No	Yes	Yes
AT3G07350	44.9902	55.0784	0.303731	2.81371	0.291878	3.21157	_	U	0.0962265	0.0441648	0.0496066	0.347055	1.1169	-1.12336	-0.955761	1.85055	3.53679	No	No	Yes	Yes
AT1G50000	3.26511	2.98957	0.0759328	0.703428	-0.127193	3.21144	_	U	0.0106666	0.0626641	0.0125688	0.787309	0.891412	2.55341	0.236538	6.20442	6.38358	No	No	Yes	Yes
AT1G06020	0.0759328	0.914457	0.189832	1.75857	3.58995	3.21154	U	U	0.0846484	0.0984222	0.128836	0.189332	0.44447	0.217477	0.605918	1.16127	2.39239	No	No	No	Yes
AT5G08400	13.6299	5.20537	0.151866	1.40686	-1.3887	3.21152	D	U	0.0189309	0.015014	0.00669205	0.0304865	0.043695	-0.334234	-1.49883	0.687142	1.20629	No	No	No	Yes
AT3G45020	7.70717	6.29568	0.0759328	0.703428	-0.291839	3.21144	_	U	0.102047	0.0661216	0.0795737	0.253756	0.406099	-0.625959	-0.358827	1.31413	1.9925	No	No	Yes	Yes
AT4G24380	18.9073	22.0525	0.0759328	0.703428	0.222	3.21144	_	U	0.0245605	0.027054	0.0253228	1.94879	5.24332	0.139445	0.0440801	6.30951	7.73741	No	No	Yes	Yes
AT4G10030	26.5765	28.4185	0.0759328	0.703428	0.096681	3.21144	_	U	0.0938174	0.195993	0.0600389	0.527494	1.05568	1.0628	-0.643872	2.4911	3.49203	No	No	Yes	Yes
AT4G04320	17.3506	9.84799	0.303731	2.7082	-0.817086	3.15643	_	U	0	0.0334028	0.00893299	0.193303	0.392199	11.7062	9.80461	14.2387	15.2593	No	No	Yes	Yes
AT1G49970	205.588	158.342	0.0759328	0.668257	-0.376715	3.13744	_	U	0.0419532	0.156411	0.173972	0.695108	0.854036	1.89824	2.05174	4.05006	4.34712	Yes	Yes	Yes	Yes
AT3G11560	59.7591	45.0546	0.911193	7.70254	-0.407484	3.07949	_	U	0.400655	0.665735	0.522114	2.48792	2.63485	0.732575	0.381997	2.63448	2.71726	No	No	Yes	Yes
AT4G34650	14.4652	14.4906	0.0759328	0.668257	0.00253398	3.13744	_	U	0.161288	0.285952	0.579653	0.250464	0.889423	0.826094	1.84549	0.634931	2.46316	No	Yes	No	Yes
AT2G04940	17.5025	17.1636	0.151866	1.26617	-0.0282049	3.05952	_	U	0.0266935	0.0490058	0.0157269	0.653769	0.823266	0.876218	-0.76288	4.6137	4.94628	No	No	Yes	Yes
AT4G09140	4.66986	3.65783	0.113899	0.949628	-0.352393	3.05949	_	U	0.0425518	0.140615	0.0512795	0.552879	0.769711	1.72422	0.269107	3.69936	4.17671	Yes	No	Yes	Yes
AT1G26200	0.0379664	0.633085	0.189832	4.07988	4.05925	4.42566	U	U	0.179155	0.222807	0.158328	0.285024	0.178239	0.31457	-0.178284	0.669842	-0.00739785	No	No	No	No
AT4G24230	73.351	82.5825	0.113899	0.949628	0.171018	3.05949	_	U	0.593775	0.528728	0.355068	1.27401	1.72976	-0.167387	-0.741804	1.10137	1.54257	No	No	Yes	Yes
AT3G63120	36.3338	25.851	0.227798	1.86408	-0.491094	3.03258	_	U	0.181945	1.06889	1.40886	0.758679	2.58593	2.55447	2.95288	2.05992	3.82903	Yes	Yes	Yes	Yes
AT2G30600	107.825	189.011	0.151866	1.231	0.809786	3.01888	_	U	0.0748428	0.0137402	0.0110237	1.51915	1.6133	-2.44461	-2.76214	4.34308	4.42982	No	No	Yes	Yes
AT1G17210	35.6125	24.7958	0.265765	2.14546	-0.522284	3.01302	_	U	0.0385609	0.106189	0.017039	0.640396	1.50258	1.46119	-1.17782	4.0534	5.28379	No	No	Yes	Yes
AT3G21055	1199.28	835.954	1.40476	11.1142	-0.520675	2.984	_	U	0.0709037	0.224543	0.0966023	0.990191	2.00748	1.66292	0.446142	3.80359	4.82318	Yes	No	Yes	Yes
AT3G51480	2.92341	3.16543	0.113899	0.914457	0.114747	3.00505	_	U	0.175143	0.448802	0.324228	0.692143	1.01614	1.3575	0.888437	1.98247	2.53642	Yes	No	Yes	Yes
AT2G35410	64.5049	24.5145	2.08815	6.61222	-1.39577	1.66291	D	U	4.18667	2.94792	2.02019	3.48439	3.9938	-0.506104	-1.05131	-0.264897	-0.0680394	No	No	No	No
AT5G06700	33.2206	34.8197	0.41763	3.27094	0.0678261	2.96938	_	U	0.237249	0.355416	0.176121	0.678172	0.821403	0.583085	-0.429812	1.51521	1.79165	No	No	Yes	Yes
AT3G46730	0	0.597914	0.493563	3.90403	15.8677	2.98363	U	U	0.178586	0.292095	0.186521	0.626397	1.1791	0.709783	0.06271	1.8104	2.72293	No	No	Yes	Yes
AT3G27270	2.31595	1.61788	0.379664	2.98957	-0.517492	2.97711	_	U	0.00693353	0.0509163	0.10621	0.0930487	0.170152	2.87467	3.93524	3.7444	4.6151	Yes	Yes	Yes	Yes
AT1G04790	12.4909	8.58182	0.0379664	1.01997	-0.541525	4.7473	_	U	0.444999	0.291772	0.112362	0.533208	0.4111	-0.608945	-1.98555	0.260892	-0.114311	No	No	No	No
AT1G61790	43.8891	40.3064	0.911193	6.96394	-0.122854	2.93406	_	U	0.0568768	0.115664	0.0889299	0.123301	0.265518	1.02389	0.644736	1.11614	2.2227	No	No	No	Yes
AT5G19850	61.0879	28.2426	0.151866	1.12549	-1.11301	2.8896	D	U	0.0878073	0.105515	0.0705449	1.10875	1.10389	0.265002	-0.315758	3.6583	3.65196	No	No	Yes	Yes
AT4G26480	37.1311	31.0915	0.151866	1.16066	-0.256107	2.93399	_	U	0.049602	0.0512229	0.030137	0.165376	0.23132	0.0463801	-0.718675	1.73708	2.22119	No	No	Yes	Yes
AT2G04842	40.0166	30.1067	1.36679	10.4107	-0.410511	2.9292	_	U	0.128903	0.113591	0.0987284	0.320029	0.39328	-0.182414	-0.384711	1.31185	1.6092	No	No	No	Yes
AT3G10130	69.7822	72.7345	0.455597	1.4772	0.0597801	1.69701	_	U	0.281338	0.099402	0.0422205	0.17097	0.316867	-1.50087	-2.736	-0.718529	0.171566	No	No	No	No
AT4G33360	13.8577	5.06468	0.303731	2.28614	-1.45215	2.91201	D	U	0.0715932	0.141951	0.158176	0.302648	0.242172	0.987396	1.14352	2.07959	1.75799	No	No	Yes	Yes
AT5G56880	0.455597	0.422057	0.113899	0.844114	-0.110317	2.88957	_	U	0.0574531	0.0632859	0.0704285	0.173481	1.00121	0.139476	0.293728	1.59415	4.12298	No	No	Yes	Yes
AT4G15180	15.6042	11.6417	0.151866	1.12549	-0.422626	2.8896	_	U	0.00146202	0.00322089	0.00387616	0.0515036	0.0916359	1.13414	1.40055	5.12909	5.9602	No	No	Yes	Yes
AT1G07640	15.1866	9.25008	0.113899	0.844114	-0.715256	2.88957	_	U	0.0343261	0.0648189	0.106175	0.320817	0.54397	0.916909	1.62878	3.224	3.98575	No	Yes	Yes	Yes
AT5G17530	22.552	3.16543	0.569496	4.1854	-2.83278	2.87759	D	U	0.921433	1.70944	0.831457	3.69019	4.25551	0.891564	-0.148236	2.00173	2.20737	No	No	Yes	Yes
AT3G04890	44.8003	38.3368	0.227798	1.65306	-0.224778	2.85925	_	U	0.0752239	0.118373	0.0237425	0.438056	1.41125	0.654002	-1.66331	2.54169	4.22946	No	No	Yes	Yes
AT1G79890	0.0379664	0.351714	0.873227	6.33085	3.21127	2.85796	_	U	0.617835	0.844622	0.626448	1.06049	0.836945	0.451079	0.0199747	0.779423	0.437906	No	No	No	No
AT1G49600	26.9561	26.871	0.151866	1.09031	-0.00456574	2.8438	_	U	0.0463424	0.0510472	0.0117014	0.226557	0.289805	0.13947	-1.98473	2.28922	2.64442	No	No	Yes	Yes
AT3G47290	16.0218	7.94874	0.227798	1.61788	-1.01124	2.82823	D	U	0.0716256	0.315589	0.0316494	0.456581	0.855111	2.13934	-1.17804	2.67215	3.57738	Yes	No	Yes	Yes
AT2G28450	5.99869	3.76334	2.46781	5.83845	-0.672632	1.24235	_	U	1.58427	2.5585	1.0125	2.70267	3.04547	0.69148	-0.645895	0.770568	0.942844	No	No	No	No
AT1G31300	41.6871	33.1315	0.379664	1.37168	-0.331398	1.85313	_	U	0	0.0117179	0	0.0321215	0.0264588	10.1957	0	11.6498	11.3701	No	No	No	No
AT2G26230	25.4754	20.9973	0.113899	0.808942	-0.278901	2.82817	_	U	0.0263821	0.065386	0.0349726	0.0763421	0.091865	1.3091	0.406534	1.53256	1.79957	No	No	No	Yes
AT1G45233	5.58106	2.88406	0.189832	1.30134	-0.952437	2.77714	_	U	0.0485858	0.149851	0.111638	0.342314	0.49304	1.62472	1.20005	2.81646	3.34283	No	No	Yes	Yes
AT5G55700	13.4781	17.1636	0.113899	0.773771	0.348743	2.76404	_	U	0.15861	0.151417	0.0794302	0.675818	1.74104	-0.0669478	-0.997632	2.09108	3.45632	No	No	Yes	Yes
AT2G48070	62.1889	57.9625	0.759328	2.25097	-0.101538	1.56774	_	U	1.9187	2.22961	1.46738	2.31848	1.68338	0.216666	-0.386879	0.273052	-0.188762	No	No	No	No
AT5G10690	28.247	21.349	0.113899	0.879285	-0.403925	2.94846	_	U	0.294346	0.294207	0.308299	0.58155	0.428414	-0.000678896	0.0668157	0.982367	0.54148	No	No	No	No
AT5G15570	11.5797	9.39077	0.151866	1.01997	-0.302289	2.74758	_	U	0.167505	0.113963	0.0696623	0.466117	0.838144	-0.555606	-1.26564	1.47643	2.32292	No	No	Yes	Yes
AT3G47700	5.20139	4.15023	0	0.773771	-0.325708	16.2396	_	U	0.0258648	0.0284906	0.0152386	0.0477274	0.0900637	0.139447	-0.762868	0.883572	1.79956	No	No	No	No
AT1G15400	51.7482	32.2522	0.0379664	0.668257	-0.682111	4.13725	_	U	0.587477	0.317568	0.341314	0.42705	0.405884	-0.887447	-0.783417	-0.460118	-0.533456	No	No	No	No
AT1G78920	22.6659	18.0429	0.0379664	1.40686	-0.329091	5.21124	_	U	0.566139	0.76081	0.380246	1.16814	0.8336	0.426373	-0.574211	1.04497	0.558191	No	No	Yes	No
AT3G54200	13.0604	15.4754	0.227798	1.51237	0.244775	2.73093	_	U	1.48	3.6853	3.89161	3.60869	4.69467	1.31618	1.39476	1.28587	1.66542	Yes	Yes	Yes	Yes
AT1G78890	46.9264	32.9908	1.10102	7.21014	-0.508338	2.71117	_	U	0.715304	0.482024	0.327229	0.728429	1.45678	-0.569443	-1.12823	0.0262318	1.02614	No	No	No	Yes
AT4G14890	130.301	115.257	0.265765	1.7234	-0.176993	2.69699	_	U	0.190141	0.261806	0.0805176	0.490408	0.555683	0.461406	-1.23959	1.36686	1.54714	No	No	Yes	Yes
AT5G13190	31.8538	34.6438	0.189832	1.231	0.121134	2.69697	_	U	0.306283	0.184024	0.24607	1.89169	2.25074	-0.734939	-0.315787	2.6267	2.87743	No	No	Yes	Yes
AT1G47750	9.68143	4.07988	0.151866	0.984799	-1.24669	2.69696	D	U	0.119425	0.123577	0.0575681	0.768566	0.676881	0.0492969	-1.05263	2.68596	2.5027	No	No	Yes	Yes
AT1G32520	63.8974	36.8245	0.0759328	5.4164	-0.795093	6.15628	_	U	0	0.00570372	0	0.0521173	0.0463639	9.15829	0	12.3478	12.1791	No	No	Yes	No
AT5G01530	4179.38	4083.19	0.113899	0.7386	-0.0335914	2.69693	_	U	0	0	0	0.0241398	0.119305	0	0	11.2378	13.5425	No	No	No	Yes
AT4G36940	6.83395	3.90403	0.113899	0.7386	-0.807755	2.69693	_	U	0.242873	0.595255	0.30586	2.62177	4.98968	1.29327	0.332655	3.43221	4.36062	Yes	No	Yes	Yes
AT1G06460	210.258	224.675	1.21492	7.84322	0.0956799	2.69057	_	U	0.185741	0.962367	1.63236	8.09423	14.6703	2.37323	3.13553	5.44545	6.30339	Yes	Yes	Yes	Yes
AT4G03120	11.6936	8.47631	0.0379664	0.879285	-0.464216	4.53317	_	U	0.00486754	0.0321703	0.00430168	0.0587907	0.0532691	2.72195	-0.177906	3.59161	3.44934	No	No	No	No
AT4G04640	1094.04	772.223	0.189832	1.19583	-0.502574	2.65515	_	U	0.0283678	0.0781195	0.02507	2.35558	2.89283	1.4611	-0.178228	6.37518	6.67158	No	No	Yes	Yes
AT5G20935	14.8449	7.80805	0.607462	3.79851	-0.926927	2.64455	_	U	0.279718	0.455475	0.354678	0.960028	1.05611	0.70338	0.342527	1.77907	1.91668	No	No	Yes	Yes
AT4G04720	16.3635	11.7472	0.151866	0.949628	-0.478159	2.64449	_	U	0.0283374	0.0312142	0.0100172	0.0855653	0.219901	0.139452	-1.49929	1.59398	2.95563	No	No	No	Yes
AT5G59350	22.1724	21.349	0.987126	3.79851	-0.0545912	1.94412	_	U	0.00488557	0.0161447	0.0129528	0.0344216	0.058327	1.7224	1.40483	2.81418	3.57486	No	No	No	No
AT3G02520	73.4649	65.8057	0.151866	0.949628	-0.158843	2.64449	_	U	0.0607357	0.221612	0.097286	1.25701	3.36492	1.86725	0.679597	4.37108	5.79165	Yes	No	Yes	Yes
AT2G47170	207.22	176.525	0.151866	0.949628	-0.231292	2.64449	_	U	0.0988378	0.0669982	0.0291159	0.959099	1.12956	-0.560872	-1.76291	3.27841	3.51442	No	No	Yes	Yes
AT1G75690	434.449	418.856	0.721361	4.50194	-0.0527324	2.64174	_	U	0.272331	0.337476	0.15042	0.599601	0.829748	0.309414	-0.856324	1.13861	1.60728	No	No	No	Yes
AT1G34430	41.801	43.0498	0.379664	2.35648	0.0424697	2.63381	_	U	0.0742091	0.215201	0.22753	1.05483	1.25812	1.53589	1.61626	3.8291	4.08334	Yes	Yes	Yes	Yes
AT2G40960	14.5032	8.30045	0.0759328	5.59225	-0.805104	6.20238	_	U	0.0295007	0.0510647	0.040969	0.0721109	0.0880495	0.791369	0.473645	1.28918	1.57724	No	No	No	No
AT1G65590	53.9502	48.1145	0	0.457228	-0.165158	15.4807	_	U	0.0256386	0.0564829	0.0317212	0.0980606	0.0765223	1.13919	0.307024	1.93494	1.57719	No	No	No	No
AT5G13310	5.88479	5.62743	0.189832	1.16066	-0.0645156	2.61208	_	U	0.0625168	0.0964091	0.0994483	0.427881	1.00759	0.624844	0.669617	2.7747	4.01031	No	No	Yes	Yes
AT5G49060	7.44141	3.16543	0.455597	2.77854	-1.23317	2.60847	D	U	0.125375	0.255638	0.157949	0.665858	0.968676	1.02779	0.333182	2.40887	2.94967	Yes	No	Yes	Yes
AT5G23710	13.2123	12.3452	0.151866	0.914457	-0.0979356	2.59004	_	U	0.0101861	0.0224405	0.00900197	0.235806	0.466166	1.13873	-0.178109	4.53157	5.51478	No	No	Yes	Yes
AT1G03130	1505.4	1340.21	0.151866	0.914457	-0.167696	2.59004	_	U	0.021414	0.0330233	0.0113548	0.0689709	0.362177	0.624689	-0.914664	1.68697	4.07943	No	No	No	Yes
AT1G15215	5.12546	4.04471	0.265765	1.58271	-0.341644	2.57413	_	U	0.0693809	0.110816	0.0429206	0.195531	0.279555	0.675474	-0.69274	1.49465	2.01037	No	No	Yes	Yes
AT1G09190	0.873227	1.16066	0.189832	1.12549	0.410509	2.56769	_	U	0.0102157	0.0140661	0.0451405	0.0873987	0.106716	0.461041	2.14254	3.09557	3.38364	No	No	Yes	Yes
AT2G03340	29.6138	27.4689	0.151866	0.879285	-0.108471	2.53346	_	U	0.0807027	0.0931289	0.0407547	0.402271	1.00171	0.206589	-0.985474	2.31734	3.63354	No	No	Yes	Yes
AT5G47680	15.4523	9.88317	0	0.4924	-0.644777	15.5876	_	U	0.004533	0.0149796	0.0160241	0.0136875	0.0225491	1.72224	1.81943	1.5922	2.31199	No	No	No	No
AT1G01320	93.6631	78.995	0.341697	1.9696	-0.245719	2.52708	_	U	0.0200624	0.0165744	0.00443253	0.878395	1.23751	-0.275388	-2.17576	5.4516	5.94609	No	No	Yes	Yes
AT1G15030	48.0654	43.296	0.493563	2.81371	-0.150766	2.51114	_	U	0.140165	0.113223	0.0440427	1.45466	3.26927	-0.307936	-1.66992	3.37539	4.54368	No	No	Yes	Yes
AT4G30845	9.75736	7.386	0.531529	3.02474	-0.401698	2.50857	_	U	0.300332	0.47353	0.286234	0.521592	0.65032	0.65688	-0.0693579	0.796344	1.11457	No	No	No	Yes
AT2G36480	5.46716	4.11505	0.341697	1.93443	-0.409879	2.50108	_	U	0.0228416	0.0503211	0.0403725	0.206913	0.465858	1.13915	0.821431	3.17872	4.34955	No	No	Yes	Yes
AT5G57440	16.6293	12.521	0	1.89926	-0.409373	17.5351	_	U	0	0.00423005	0	0.0193259	0.0152822	8.72794	0	10.9171	10.5786	No	No	No	No
AT1G48970	7.06175	2.74337	0.41763	4.36125	-1.36407	3.38441	D	U	0.199411	0.206476	0.144508	0.36529	0.226166	0.0502289	-0.464571	0.873264	0.181627	No	No	No	No
AT4G30390	23.4253	15.8975	0.189832	4.57228	-0.559267	4.59005	_	U	0.0170647	0.0187972	0.00301618	0.0583977	0.0509324	0.139421	-2.49629	1.77429	1.577	No	No	No	No
AT1G36390	26.8802	16.7768	0.569496	3.2006	-0.680079	2.49056	_	U	0.0950048	0.1932	0.109794	0.492826	0.479865	1.02394	0.208708	2.37489	2.33643	No	No	Yes	Yes
AT2G04700	250.502	254.746	0.759328	4.22057	0.0242392	2.47463	_	U	0.0406504	0.134332	0.0646644	0.335502	0.541929	1.72421	0.669571	3.04467	3.73643	No	No	Yes	Yes
AT1G64105	12.0353	10.1294	0.265765	1.4772	-0.248733	2.4746	_	U	0.0174139	0.0319697	0.061558	0.111006	0.127049	0.876087	1.82111	2.67163	2.86636	No	No	Yes	Yes
AT3G61415	11.5038	11.6769	0.227798	1.26617	0.0215461	2.47459	_	U	0.185832	0.278524	0.231536	0.778829	5.42522	0.583775	0.317217	2.06725	4.86753	No	No	Yes	Yes
AT4G02920	220.053	196.221	2.35392	12.9782	-0.16537	2.46296	_	U	0.930383	1.17927	0.50685	4.48977	5.09727	0.341988	-0.876253	2.27073	2.45382	No	No	Yes	Yes
AT2G36390	41.0037	50.5765	0.607462	3.34128	0.302713	2.45952	_	U	0.104174	0.424575	0.561588	0.629112	2.26456	2.02692	2.4304	2.59421	4.44203	Yes	Yes	Yes	Yes
AT1G69980	45.218	29.3681	0.987126	5.4164	-0.622644	2.45602	_	U	0.199361	0.307441	0.281895	0.642106	0.925592	0.6249	0.499756	1.68738	2.21494	No	No	Yes	Yes
AT3G07760	38.2701	35.5935	0.379664	2.07511	-0.104606	2.45036	_	U	0.0589544	0.0865861	0.0347338	0.346139	0.73316	0.554458	-0.763087	2.55348	3.63623	No	No	Yes	Yes
AT5G26600	12.5669	11.8879	0.0379664	0.597914	-0.0801273	3.97679	_	U	0	0.00883297	0	0.0282487	0.0319114	9.78839	0	11.4645	11.6403	No	No	No	No
AT3G23260	1.02509	0.914457	0.41763	2.18063	-0.164765	2.38442	_	U	0.386634	0.544884	0.351736	2.08882	2.28531	0.494969	-0.136471	2.43362	2.56332	No	No	Yes	Yes
AT1G62250	41.2695	27.4337	2.73358	14.2444	-0.589125	2.38153	_	U	0.110035	0.40979	0.217638	1.24463	0.740237	1.89683	0.983912	3.49956	2.74992	Yes	No	Yes	Yes
AT4G11670	4.66986	2.49717	0.379664	1.9696	-0.903084	2.37508	_	U	0.0483828	0.0621772	0.0285055	0.819745	1.10444	0.361825	-0.763049	4.08233	4.51239	No	No	Yes	Yes
AT4G08960	8.6943	6.82325	0.189832	0.984799	-0.34961	2.37505	_	U	0	0	0.010695	0.19489	0.614039	0	10.0641	14.2504	15.9061	No	No	Yes	Yes
AT5G19240	18.6795	40.0251	0.303731	1.54754	1.09945	2.34907	U	U	0.029923	0.0109869	0.00881478	4.2466	2.98692	-1.44463	-1.7621	7.14843	6.64078	No	No	Yes	Yes
AT4G21770	11.8835	6.6474	0.227798	1.16066	-0.838095	2.34906	_	U	0.0267386	0.0392709	0.0236302	0.322951	0.461099	0.554364	-0.178224	3.59383	4.10757	No	No	Yes	Yes
AT5G16780	13.6299	5.6626	1.17696	5.94397	-1.26724	2.33635	D	U	0.330761	0.867476	0.445423	1.56945	1.58266	1.39101	0.429377	2.24636	2.25846	Yes	No	Yes	Yes
AT3G08010	39.2572	30.6343	0.265765	1.33651	-0.357811	2.33021	_	U	0.123185	0.135691	0.0453601	0.247973	0.418729	0.139488	-1.44113	1.0093	1.76511	No	No	No	Yes
AT1G75440	20.9574	18.8167	0.379664	1.89926	-0.155449	2.32261	_	U	0.670545	1.60438	1.48634	5.05628	4.00269	1.2586	1.14834	2.91465	2.57755	Yes	Yes	Yes	Yes
AT5G52180	18.5276	16.214	0.227798	1.12549	-0.192434	2.30467	_	U	8.64555	11.3155	9.49792	10.4826	10.5093	0.388271	0.135654	0.277965	0.281632	No	No	No	No
AT3G21220	16.895	12.0638	2.08815	10.2349	-0.485916	2.29319	_	U	0.180523	0.613593	0.508237	1.93638	1.07503	1.76505	1.49327	3.42303	2.57406	Yes	Yes	Yes	Yes
AT5G04590	205.436	236.106	4.25223	20.8215	0.200743	2.29178	_	U	0.324172	0.250718	0.280391	2.3048	3.93193	-0.370683	-0.209315	2.82977	3.60036	No	No	Yes	Yes
AT1G79040	17356.7	19142.1	0.227798	1.09031	0.141253	2.25886	_	U	0.0197619	0.0544203	0.00873224	0.447536	0.796262	1.46096	-1.17737	4.50051	5.33174	No	No	Yes	Yes
AT1G51965	6.34039	2.81371	0.531529	2.49717	-1.17209	2.23205	D	U	0.25678	0.291973	0.131765	1.12551	0.865291	0.185296	-0.962513	2.13193	1.75261	No	No	Yes	Yes
AT2G41600	20.0083	11.4659	0	1.79374	-0.80325	17.4526	_	U	0.00311293	0	0.00825313	0.0125328	0.00619402	-8.28676	1.40379	2.00588	0.990302	No	No	No	No
AT4G34120	156.004	169.21	1.36679	6.6474	0.11723	2.28199	_	U	0.297263	0.821636	0.994875	8.32489	14.7022	1.46673	1.74274	4.80757	5.6281	Yes	Yes	Yes	Yes
AT5G39250	7.78311	3.16543	1.21492	5.59225	-1.29794	2.20255	D	U	0.127143	0.196946	0.175565	0.483887	0.454582	0.631312	0.46553	1.92814	1.83801	No	No	Yes	Yes
AT3G51420	160.522	138.997	1.36679	6.36602	-0.207712	2.21959	_	U	0.230363	0.483334	0.145416	3.14671	5.44587	1.06908	-0.663685	3.7718	4.56312	No	No	Yes	Yes
AT1G56000	19.3629	7.70254	0.759328	3.4468	-1.32988	2.18245	D	U	0.352356	0.810647	0.528186	1.70142	1.40665	1.20202	0.584	2.2716	1.99713	Yes	No	Yes	Yes
AT4G36760	23.1975	15.6161	0.493563	2.2158	-0.570932	2.1665	_	U	0.218771	0.653187	0.943797	1.9354	2.15075	1.57803	2.109	3.14508	3.29728	Yes	Yes	Yes	Yes
AT4G30660	119.29	155.141	0.493563	2.2158	0.379103	2.1665	_	U	0.0670021	0.193736	0.162836	1.15488	2.90802	1.53168	1.28101	4.10719	5.43947	No	No	Yes	Yes
AT2G19540	26.6904	12.1693	1.63255	7.1398	-1.13307	2.12874	D	U	0.40278	0.610048	0.649619	0.891883	1.16209	0.598918	0.689588	1.14684	1.52863	No	No	Yes	Yes
AT4G05460	15.1106	15.0182	0.341697	1.4772	-0.00885171	2.11204	_	U	0.0490373	0.0540157	0.0606712	0.128327	0.536652	0.139472	0.307076	1.38769	3.45177	No	No	No	Yes
AT5G19080	6.07462	5.27571	0.0759328	1.4772	-0.203428	4.28182	_	U	0.00322126	0.00354829	0.00854033	0.0129689	0.0160239	0.139087	1.40388	2.006	2.31096	No	No	No	No
AT4G08470	14.1235	11.2549	0.227798	0.984799	-0.32755	2.11202	_	U	0.035894	0.118614	0	0.289021	0.392814	1.72418	-11.8099	3.00901	3.45167	No	No	Yes	Yes
AT1G75010	7.97294	10.1294	0.303731	1.26617	0.34536	2.05957	_	U	0.17874	0.153572	0.132688	0.349013	0.366322	-0.218942	-0.429805	0.965376	1.0352	No	No	No	Yes
AT3G45050	59.7591	14.4554	0.455597	2.00477	-2.04754	2.13758	D	U	0.266486	0.861051	0.361109	1.97291	0.972117	1.692	0.438363	2.88815	1.86703	Yes	No	Yes	Yes
AT2G46160	7.28954	5.45157	0.759328	3.13026	-0.419157	2.04347	_	U	0.0277341	0.0610995	0.00612749	0.20936	0.193146	1.13921	-2.17646	2.9158	2.79951	No	No	Yes	Yes
AT3G63190	99.8516	105.268	0.151866	1.231	0.0762101	3.01888	_	U	0	0	0	0	0	0	0	0	0	No	No	No	No
AT3G19540	14.2754	14.8775	0.265765	1.09031	0.0596056	2.03648	_	U	0.0471109	0.0741338	0.0237909	0.203218	0.328089	0.65396	-0.985349	2.10866	2.79969	No	No	Yes	Yes
AT2G44100	67.3524	55.2191	0	0.4924	-0.286561	15.5876	_	U	0.00653022	0.00359659	0.00288553	0.0624408	0.0454777	-0.858703	-1.17551	3.25531	2.79807	No	No	Yes	No
AT1G61290	2.12612	1.16066	0.265765	1.09031	-0.873275	2.03648	_	U	0.0349947	0.132774	0.0549803	1.53804	1.30752	1.92347	0.651631	5.45742	5.22316	Yes	No	Yes	Yes
AT2G33255	33.3345	32.6742	0.227798	0.984799	-0.0288617	2.11202	_	U	5.56163	4.39687	3.65126	4.03371	4.49099	-0.339029	-0.60711	-0.463401	-0.308475	No	No	No	No
AT5G56670	100.079	76.955	0.493563	1.9696	-0.379057	1.99657	_	U	0.199379	0.600034	0.387012	1.56241	2.11465	1.58948	0.95683	2.97012	3.40677	Yes	No	Yes	Yes
AT4G28290	45.5976	35.1011	1.89832	7.8784	-0.377444	2.05317	_	U	0.202939	0.214228	0.209238	1.38726	4.51754	0.0780944	0.0440957	2.77306	4.47635	No	No	Yes	Yes
AT1G74470	1471.73	1245.91	0.379664	1.54754	-0.24031	2.02716	_	U	0.104369	0.0894168	0.0614904	0.385176	0.957588	-0.223048	-0.763161	1.88373	3.19759	No	No	Yes	Yes
AT2G22480	19.3629	14.3499	0	0.597914	-0.432247	15.8677	_	U	0.00940538	0.00345341	0.0138533	0.0283998	0.0374291	-1.44283	0.558179	1.5933	1.99145	No	No	No	No
AT2G36900	26.5765	20.9622	0.797294	3.16543	-0.342362	1.9892	_	U	0.187606	0.174363	0.145072	0.454365	1.10238	-0.105608	-0.370917	1.2761	2.55478	No	No	Yes	Yes
AT1G72750	47.382	34.3976	0.265765	1.05514	-0.462031	1.98918	_	U	0.214354	0.590291	0.306011	1.45216	2.45794	1.46138	0.513563	2.76007	3.51932	Yes	No	Yes	Yes
AT1G08550	73.389	86.8734	0.41763	1.65306	0.24335	1.98481	_	U	0.134755	0.141839	0.0661609	1.00669	3.01202	0.0739051	-1.02618	2.90112	4.48221	No	No	Yes	Yes
AT3G57080	29.9934	29.544	0.303731	1.19583	-0.0217827	1.97711	_	U	0.233564	0.140332	0.056294	2.66072	6.27397	-0.734929	-2.05257	3.50987	4.74743	No	No	Yes	Yes
AT3G10970	121.454	118.211	1.17696	4.60745	-0.0390498	1.9689	_	U	0.344455	0.275945	0.138369	1.1504	1.97827	-0.319922	-1.31574	1.73972	2.52182	No	No	Yes	Yes
AT5G18210	9.036	7.52668	0.341697	1.33651	-0.26367	1.96765	_	U	0.272766	0.323073	0.277345	0.720303	0.507727	0.244188	0.0240127	1.4009	0.896362	No	No	Yes	No
AT1G80440	248.224	280.351	0.379664	1.4772	0.175592	1.96004	_	U	0.00792255	0	0.00700153	0.414654	0.685736	-9.63164	-0.178055	5.70801	6.43375	No	No	Yes	Yes
AT5G13660	7.13768	5.1702	0.0379664	0.808942	-0.465235	4.41288	_	U	0	0.0096333	0	0.0176047	0.0203017	9.91338	0	10.7826	10.9881	No	No	No	No
AT5G15710	4.82173	3.55231	0.41763	1.61788	-0.440791	1.95379	_	U	0.0312214	0.0429888	0.0413877	0.199022	0.515107	0.4613	0.406554	2.67193	4.04383	No	No	Yes	Yes
AT4G23330	10.0611	9.10939	0	0.773771	-0.143359	16.2396	_	U	0	0.0121528	0	0	0.0192086	10.2483	0	0	10.9083	No	No	No	No
AT1G69880	1.97425	0.668257	0.455597	1.75857	-1.56282	1.94855	D	U	0.191339	0.103596	0.26654	0.316622	0.44525	-0.885099	0.4782	0.726598	1.21844	No	No	No	Yes
AT5G25450	17.7303	9.74248	0.0759328	0.633085	-0.863855	3.05944	_	U	0.0200189	0.0126007	0.00758214	0.0172708	0.0341426	-0.667432	-1.39951	-0.212919	0.769911	No	No	No	No
AT2G33370	74.3382	81.7735	0.493563	1.89926	0.137531	1.94411	_	U	1.81763	2.527	1.12287	8.68548	24.4739	0.475364	-0.694865	2.25654	3.75111	No	No	Yes	Yes
AT2G41705	13.8577	13.4003	0.493563	1.89926	-0.0484248	1.94411	_	U	0.149615	0.230726	0.220369	0.426668	0.610283	0.624892	0.55864	1.5118	2.02815	No	No	Yes	Yes
AT3G15520	41.1176	34.6087	0.645428	2.462	-0.248622	1.93148	_	U	0.649016	1.57836	1.10244	4.04669	7.2536	1.28209	0.764363	2.6404	3.48235	Yes	No	Yes	Yes
AT2G20495	8.99803	6.85842	1.06306	3.97437	-0.391732	1.90249	_	U	0.418253	0.623737	0.477675	1.25645	2.13818	0.576551	0.191651	1.58688	2.35391	No	No	Yes	Yes
AT4G01690	56.0763	27.082	6.79598	25.3938	-1.05006	1.90172	D	U	1.20884	1.41254	0.938378	2.03058	3.02289	0.224664	-0.365377	0.748267	1.3223	No	No	No	Yes
AT5G27990	23.3873	22.6856	2.58171	9.60179	-0.0439505	1.89497	_	U	0.0898114	0.18137	0.211655	0.15066	0.275502	1.01389	1.23665	0.746259	1.61698	No	No	No	Yes
AT1G55270	15.6801	14.0686	0.569496	2.11028	-0.156461	1.88966	_	U	0.315472	0.524655	0.502928	1.93628	4.60325	0.733842	0.672825	2.61767	3.86703	No	No	Yes	Yes
AT3G22540	2.54375	2.81371	0.341697	1.51237	0.145519	2.14599	_	U	0	0	0	0	0	0	0	0	0	No	No	No	No
AT2G39870	25.5134	30.986	0.493563	1.82891	0.280361	1.88966	_	U	0.108792	0.0748981	0.156235	0.971814	0.960591	-0.538513	0.522105	3.15899	3.14223	No	No	Yes	Yes
AT1G59840	18.5656	5.73294	1.21492	4.4316	-1.69528	1.86695	D	U	2.46167	3.33007	2.247	5.16762	3.26138	0.435911	-0.131637	1.06986	0.40584	No	No	Yes	No
AT1G75350	532.592	492.083	0.41763	1.54754	-0.11413	1.88966	_	U	0.00785181	0.0345958	0.00693902	0.118544	0.273408	2.13808	-0.178053	3.91453	5.1201	No	No	Yes	Yes
AT2G19340	12.9845	7.56185	0.607462	2.77854	-0.779978	2.19344	_	U	0.46919	0.765129	0.616176	1.11861	0.743213	0.70552	0.393165	1.25345	0.663593	No	No	Yes	No
AT1G63855	5.31529	0.703428	0.873227	3.2006	-2.91766	1.8739	D	U	0.495186	0.668033	0.755589	1.9395	1.33773	0.431942	0.609622	1.96962	1.43372	No	No	Yes	Yes
AT1G24040	33.7521	22.6856	0.569496	2.07511	-0.573203	1.86541	_	U	0.446536	0.65248	0.265768	2.06377	3.02817	0.547147	-0.748588	2.2084	2.76157	No	No	Yes	Yes
AT3G10620	28.9683	21.7008	0.341697	1.231	-0.416732	1.84901	_	U	0.0955296	0.347252	0.242015	0.759595	1.01694	1.86186	1.34099	2.99108	3.412	Yes	Yes	Yes	Yes
AT4G09000	143.247	137.485	0.341697	1.231	-0.0592319	1.84901	_	U	0.115332	0.0808438	0.0301139	1.54336	1.52033	-0.512525	-1.93693	3.7421	3.72041	No	No	Yes	Yes
AT1G75500	92.7519	90.1795	2.96138	8.47631	-0.040577	1.51716	_	U	2.20053	0.98366	1.07563	0.24856	0.743651	-1.16161	-1.03266	-3.14613	-1.56514	No	No	No	No
AT3G13120	227.001	254.043	0.987126	3.55231	0.162375	1.84744	_	U	0.0104899	0.0346646	0.0741633	0.158372	0.281779	1.7235	2.82053	3.91497	4.74617	No	No	Yes	Yes
AT5G42300	127.073	81.1053	0.645428	2.32131	-0.647795	1.8466	_	U	0.00601644	0.0463907	0.101023	1.28379	1.90943	2.94477	4.06738	7.73489	8.30763	No	Yes	Yes	Yes
AT2G47890	21.0334	28.9109	0.455597	1.61788	0.458933	1.82826	_	U	0.192369	0.711376	0.522161	2.46176	3.22621	1.88668	1.44057	3.67767	4.06782	Yes	Yes	Yes	Yes
AT3G06980	29.8416	25.7103	0.721361	2.53234	-0.214977	1.81166	_	U	0.312214	0.790995	0.317306	1.22556	1.58415	1.3411	0.0233385	1.9728	2.34306	Yes	No	Yes	Yes
AT4G01800	65.3022	55.1136	0.607462	2.11028	-0.244723	1.79655	_	U	0.10043	0.119135	0.0614453	0.528743	0.753212	0.246391	-0.708718	2.39627	2.90675	No	No	Yes	Yes
AT3G51510	243.744	215.601	3.41697	11.7121	-0.177006	1.7772	_	U	0.806982	1.58978	0.726882	2.2024	5.57366	0.978209	-0.150812	1.44846	2.788	No	No	Yes	Yes
AT2G41000	14.8449	10.3404	0.721361	2.49717	-0.521671	1.79149	_	U	0.135971	0.420201	0.320436	0.942783	0.52607	1.62771	1.23668	2.79354	1.95188	Yes	Yes	Yes	Yes
AT1G22540	6.30242	7.84322	0.303731	1.44203	0.315541	2.2472	_	U	0.048788	0.0349317	0.0215581	0.0859346	0.0630999	-0.481872	-1.17792	0.816585	0.371046	No	No	No	No
AT3G07470	45.9393	57.4701	0.645428	2.2158	0.323082	1.77948	_	U	0.108345	0.119345	0.124475	0.316246	0.560514	0.139486	0.2002	1.54532	2.37101	No	No	No	Yes
AT1G66940	9.60549	15.2292	0.379664	1.30134	0.66491	1.77718	_	U	3.84879	0.956286	0.204593	3.1748	1.41072	-2.00888	-4.23351	-0.277739	-1.44796	No	No	No	No
AT3G17040	63.3659	47.9738	4.4041	14.772	-0.40146	1.74594	_	U	0.985184	1.81563	0.644618	3.32757	4.42008	0.881996	-0.61194	1.75599	2.16559	No	No	Yes	Yes
AT3G61220	107.9	93.7318	0.569496	1.93443	-0.20309	1.76413	_	U	0.0155761	0.0857873	0.0412961	0.184211	0.189832	2.46067	1.40609	3.5631	3.60646	No	No	Yes	Yes
AT1G66460	0.645428	0.175857	0	0.7386	-1.87579	16.1725	_	U	0	0.00244514	0.00196172	0	0.00441685	7.93966	7.62331	0	8.79014	No	No	No	No
AT1G07705	9.33973	8.54665	0.379664	1.26617	-0.128021	1.73765	_	U	0.119241	0.322894	0.296378	1.12766	1.56939	1.4371	1.31349	3.24127	3.71814	Yes	Yes	Yes	Yes
AT5G01260	20.274	14.2092	0.0379664	0.633085	-0.512803	4.05925	_	U	0.0403104	0.0514138	0.0206245	0.057656	0.0591009	0.350926	-0.966449	0.516211	0.551915	No	No	No	No
AT3G01360	12.9845	9.88317	0.455597	1.51237	-0.393745	1.73096	_	U	0.590243	0.61733	0.57695	0.900128	0.658403	0.0647299	-0.0328636	0.608812	0.157658	No	No	No	No
AT2G29950	4.44207	3.16543	0	0.703428	-0.48883	16.1021	_	U	0.05926	0.0728081	0.0322282	0.0688219	0.0975056	0.296995	-0.87853	0.215775	0.718331	No	No	No	No
AT5G51020	52.1278	44.5973	1.25289	4.15023	-0.225096	1.72792	_	U	0.0943208	0.0977849	0.0147098	0.502595	0.695508	0.0520305	-2.67997	2.41362	2.88229	No	No	Yes	Yes
AT2G23600	159.725	152.996	0.531529	1.75857	-0.0620958	1.72616	_	U	0.458081	0.317703	0.0299873	1.43442	1.80607	-0.527912	-3.93273	1.64677	1.97916	No	No	Yes	Yes
AT3G27925	125.479	130.521	0.797294	2.60268	0.0568384	1.7068	_	U	0.00574773	0.00633125	0	0.109918	0.211578	0.139268	-9.16936	4.25491	5.19962	No	No	Yes	Yes
AT3G15110	54.3679	61.0576	0.303731	1.37168	0.167416	2.17505	_	U	0.863138	1.03676	0.569222	1.24201	1.05938	0.264423	-0.600591	0.525013	0.295553	No	No	No	No
AT2G11891	22.6659	19.5553	1.17696	3.83368	-0.212965	1.70366	_	U	0.546656	0.855233	0.546119	2.23275	5.20214	0.645675	-0.00141683	2.0301	3.25038	No	No	Yes	Yes
AT3G06310	22.9697	19.0277	3.22714	6.8936	-0.271626	1.095	_	U	0.0258161	0.00437493	0.012285	0.0159902	0.00987849	-2.55821	-1.07076	-0.690738	-1.38501	No	No	No	No
AT1G70190	24.4883	20.4346	2.01222	6.54188	-0.26108	1.70091	_	U	0.0571748	0.215929	0.223767	0.517922	0.511941	1.91692	1.96836	3.17906	3.1623	No	Yes	Yes	Yes
AT2G13290	15.6421	16.5657	0.379664	1.231	0.0827633	1.69701	_	U	0.127143	0.210076	0.140452	0.991768	1.15424	0.724416	0.143623	2.96346	3.18233	No	No	Yes	Yes
AT2G01620	30.7907	5.02951	0.987126	3.09508	-2.614	1.64866	D	U	2.00321	2.95329	2.58703	4.13832	2.22695	0.560003	0.368982	1.04673	0.152751	No	No	Yes	No
AT4G03635	4.66986	3.86885	0.683395	2.11028	-0.271474	1.62663	_	U	0.753774	0.788784	0.832682	2.27604	2.28725	0.0654973	0.143632	1.59431	1.6014	No	No	Yes	Yes
AT3G04730	352.746	410.099	0.41763	1.30134	0.217343	1.63968	_	U	0.0875754	0.241166	0.0967431	3.23934	3.83361	1.46132	0.143618	5.20887	5.45187	No	No	Yes	Yes
AT5G18920	4.93563	3.86885	0.0379664	0.984799	-0.351327	4.69667	_	U	0.0426665	0.046998	0.0143643	0.0327193	0.0343628	0.139468	-1.56995	-0.382856	-0.312171	No	No	No	No
AT4G29590	27.8673	17.8319	0.873227	2.67303	-0.644113	1.61404	_	U	0.822833	1.49551	1.09985	3.57156	3.17217	0.861957	0.418636	2.11787	1.94679	No	No	Yes	Yes
AT2G39720	30.2592	23.5648	0.721361	2.18063	-0.360738	1.59594	_	U	0.0502516	0.235251	0.432995	1.64381	1.99978	2.22674	3.10685	5.03145	5.31425	No	Yes	Yes	Yes
AT1G68238	35.3467	35.91	1.02509	2.98957	0.0228104	1.54417	_	U	0.00102118	0.0112485	0.0640748	0.0472798	0.0457179	3.44865	5.95762	5.51917	5.47071	No	Yes	Yes	Yes
AT4G01290	141.159	159.151	0.759328	2.18063	0.173072	1.52194	_	U	14.0836	18.2775	19.1432	20.5842	12.164	0.376052	0.442817	0.547515	-0.211403	No	No	No	No
AT4G36350	0.379664	0.457228	1.44272	4.00954	0.268186	1.47464	_	U	0	0.0119161	0.0143404	0.0163324	0.113007	10.2199	10.4869	10.6744	13.4642	No	No	No	Yes
AT1G34190	37.5487	38.2313	0.759328	2.14546	0.0259902	1.49848	_	U	0.0213332	0.0548311	0.0691283	1.13802	2.07289	1.36148	1.69571	5.73662	6.60173	No	No	Yes	Yes
AT4G23170	2.24002	3.37646	0.569496	1.58271	0.591998	1.47463	_	U	0.0279669	0.0410749	0.0494313	0.356553	0.5843	0.554372	0.821481	3.67185	4.38443	No	No	Yes	Yes
AT3G21660	188.503	172.973	3.87257	10.6218	-0.124041	1.45566	_	U	0.392371	2.62189	0.452125	4.34199	10.583	2.74028	0.204498	3.46803	4.75335	Yes	No	Yes	Yes
AT1G65070	23.2354	24.8662	0.607462	1.65306	0.0978592	1.44425	_	U	0.073693	0.113644	0.065126	0.341194	0.645181	0.624857	-0.178269	2.21084	3.12993	No	No	Yes	Yes
AT5G45510	31.588	30.3529	1.48069	3.76334	-0.0575423	1.34574	_	U	0.0541171	0.0539339	0.0478258	0.226955	0.160239	-0.00489027	-0.17826	2.06805	1.56589	No	No	Yes	Yes
AT4G16410	288.658	264.137	3.56884	9.56662	-0.128075	1.42255	_	U	0.632886	0.524812	0.276513	0.944771	3.53735	-0.270141	-1.19457	0.578012	2.48263	No	No	No	Yes
AT4G03260	51.0268	41.045	1.10102	2.77854	-0.314048	1.33547	_	U	0.132513	0.185775	0.106462	1.455	2.46292	0.487391	-0.315772	3.45672	4.21606	No	No	Yes	Yes
AT1G70985	8.16277	4.71297	0	1.75857	-0.792422	17.4241	_	U	0.0367862	0.038759	0.0127212	0.0450746	0.0318244	0.0753484	-1.53119	0.293079	-0.208971	No	No	No	No
AT3G18990	3.30307	4.11505	0.341697	1.16066	0.317101	1.76412	_	U	8.66694	8.17949	6.97337	9.98477	7.9609	-0.0835104	-0.313665	0.204207	-0.122591	No	No	No	No
AT5G63820	10.5547	16.0382	1.17696	2.88406	0.603629	1.29303	_	U	0.338439	0.340844	0.316185	0.775364	1.09029	0.0102154	-0.0981213	1.19596	1.68772	No	No	Yes	Yes
AT4G27040	35.2328	32.7798	1.02509	2.56751	-0.104114	1.32461	_	U	0.462139	1.05352	0.365797	3.51893	5.1015	1.18881	-0.337276	2.92871	3.4645	Yes	No	Yes	Yes
AT3G63420	34.5114	30.4936	1.29086	3.13026	-0.178568	1.27794	_	U	1.3394	1.36361	1.21956	3.6971	5.02734	0.0258418	-0.135225	1.4648	1.9082	No	No	Yes	Yes
AT4G36850	283.647	257.666	5.46716	13.5058	-0.138595	1.30472	_	U	3.18217	0.119837	0.120181	1.50563	1.82648	-4.73075	-4.72662	-1.07964	-0.800944	No	No	No	No
AT5G42530	32.2714	56.8018	0.0379664	0.773771	0.81568	4.34875	_	U	0.118489	0.0982915	0.0413686	0.19435	0.0931421	-0.269589	-1.51792	0.713855	-0.347215	No	No	No	No
AT5G22780	17.6544	14.561	0.83526	1.93443	-0.277919	1.2116	_	U	0.333638	0.421955	0.196568	1.09449	1.61048	0.338798	-0.763227	1.71387	2.2711	No	No	Yes	Yes
AT2G30440	63.0242	68.3029	0.759328	2.11028	0.116041	1.47463	_	U	0.0028552	0.00471761	0.00504656	0.00574757	0.0113624	0.722472	0.819517	1.00682	1.98883	No	No	No	No
AT5G27320	42.5223	47.8331	0.341697	1.16066	0.169789	1.76412	_	U	1.22007	1.65151	2.74846	0.703301	0.747182	0.436818	1.17165	-0.794739	-0.707424	No	Yes	No	No
AT4G28180	3.9485	5.73294	1.17696	2.7082	0.537968	1.20226	_	U	0.393948	0.591118	0.548268	0.596328	0.876448	0.58543	0.476867	0.59809	1.15364	No	No	No	Yes
AT1G56590	6.11259	5.69777	0.83526	2.03994	-0.101386	1.28822	_	U	0	0	0	0.00578514	0.03431	0	0	9.1787	11.7448	No	No	No	Yes
AT1G17110	14.0096	10.5514	1.13899	2.7082	-0.408977	1.24957	_	U	0.476343	0.867778	0.259057	2.78907	7.32733	0.86531	-0.878709	2.54968	3.94319	No	No	Yes	Yes
AT1G04940	59.4553	65.5595	0	1.01997	0.140998	16.6382	_	U	2.29249	2.77863	1.90168	2.75593	2.21538	0.277452	-0.269639	0.26562	-0.0493642	No	No	No	No
AT3G56140	51.1787	53.8826	1.25289	3.83368	0.0742764	1.61346	_	U	12.8038	10.6837	9.84173	13.2821	7.78105	-0.261162	-0.379584	0.0529179	-0.71853	No	No	No	No
AT1G31190	33.3724	14.7368	1.70849	3.86885	-1.17923	1.17918	D	U	1.39562	1.40245	1.39566	2.29188	3.39812	0.00704839	4.26212e-05	0.715623	1.28383	No	No	No	Yes
AT2G22090	19.7425	15.2644	1.13899	2.56751	-0.371136	1.17261	_	U	2.15288	2.23437	1.17675	4.80974	5.95513	0.0535984	-0.87145	1.15969	1.46786	No	No	Yes	Yes
AT3G06630	0.83526	0.773771	0.227798	1.7234	-0.110318	2.91937	_	U	0.155875	0.175755	0.162701	0.326132	0.194152	0.173171	0.0618355	1.06502	0.316782	No	No	Yes	No
AT4G13630	38.1942	49.0993	0.41763	2.32131	0.362349	2.47461	_	U	3.16181	3.45924	3.46654	3.2099	2.6395	0.129703	0.132745	0.0217791	-0.260487	No	No	No	No
AT1G35340	71.149	83.1804	0.455597	1.37168	0.2254	1.5901	_	U	0.0976099	0.0543638	0.0571852	0.0750637	0.0349162	-0.844264	-0.771281	-0.378868	-1.48287	No	No	No	No
AT2G13360	1672.68	1375.13	4.82173	10.8328	-0.282596	1.16778	_	U	0.23749	0.216105	0.063877	1.54854	3.81123	-0.13613	-1.89434	2.70491	4.00426	No	No	Yes	Yes
AT5G11390	5.80886	6.19017	0.227798	1.01997	0.0917243	2.16265	_	U	0.0209748	0.00831751	0.00296583	0.0152001	0.0183634	-1.33339	-2.81798	-0.464312	-0.191725	No	No	No	No
AT1G04620	5.80886	13.8575	2.65765	5.73294	1.25434	1.10912	U	U	0.14282	0.428259	0.729254	1.25382	3.43384	1.58422	2.35214	3.13396	4.58745	Yes	Yes	Yes	Yes
AT2G40410	35.9921	28.3482	4.518	9.74248	-0.344426	1.1086	_	U	3.69933	3.3886	2.66704	6.56496	7.5739	-0.126576	-0.472024	0.827518	1.03377	No	No	No	Yes
AT3G14290	35.043	37.6334	1.02509	2.49717	0.102889	1.28453	_	U	0.246958	0.15297	0.0513881	0.16594	0.0946027	-0.690984	-2.26454	-0.573579	-1.38422	No	No	No	No
AT1G67330	8.99803	5.48674	0.607462	1.82891	-0.713659	1.5901	_	U	0	0	0	0	0.000704527	0	0	0	6.15892	No	No	No	No
AT4G13670	53.7604	54.9377	1.32882	2.84888	0.0312538	1.10024	_	U	0.0268931	0.100719	0.0380267	0.443916	0.936443	1.90464	0.49962	4.04448	5.12136	Yes	No	Yes	Yes
AT3G21370	17.8062	13.0838	0.341697	1.16066	-0.444604	1.76412	_	U	0.0153648	0.010001	0.00123442	0.013356	0.0111173	-0.61899	-3.62702	-0.202005	-0.466471	No	No	No	No
AT3G47220	0.265765	0.351714	0.569496	1.65306	0.404241	1.53736	_	U	0.029265	0.0610427	0.0203601	0.0426164	0.0334516	1.06039	-0.523215	0.542078	0.192839	Yes	No	No	No
AT1G49975	130.187	77.553	2.77155	5.9088	-0.747329	1.09217	_	U	1.60766	1.54384	0.783241	2.36495	5.43398	-0.0584403	-1.03742	0.556843	1.75704	No	No	No	Yes
AT5G26200	7.32751	7.6322	1.59459	3.23577	0.0587748	1.02092	_	U	0.0666535	0.10139	0.114444	0.10095	0.159782	0.605088	0.779795	0.59882	1.26122	No	No	No	Yes
