# Supplementary material for: Dehydration stress extends mRNA 3′ untranslated regions with noncoding RNA functions in Arabidopsis
Source: HighWire-hosted journal article supplement (doi:10.1101/gr.218669.116), 2017-05-18
Supplement: Supplemental_Table_S7.xlsx [file Supplemental_Table_S7.xlsx]

## Sheet: Supplemental Table 7
Supplemental Table 7. Primers used in this study.
Name	Sequence (5'→3')	Description
ERF4_P1	CGTGTTATCAGATCCCGATGTC	Semiquantitative PCR/real-time PCR
ERF4_P2	TCTAAACGCCGATGTCACAG
ERF4_P3	CGACGTATAAGAGGGTGTGAAATAG	Semiquantitative PCR/real-time PCR
ERF4_P4	ACAAGAATCCAATCAAAAACCTCTC
ERF4_P5	CGGCTCCTTCTATTGGCTTTC	Semiquantitative PCR
ERF4_P6	CTCTGTGAGTGGACCCTACT
FAMT_P1	CCGTTAGACCCCGAGTATTTG	Semiquantitative PCR/real-time PCR
FAMT_P2	GCTCATAGGTTTTCTCCATCCC
FAMT_P3	CAGACCAAATCACATGAGTGC	Semiquantitative PCR/real-time PCR
FAMT_P4	CAACAGCTCTAATGTCCAAACAAG
FAMT_P5	TCACTATTTGGGCAAGATGGG	Semiquantitative PCR
FAMT_P6	GGAGTTATGAGTTTGGGTGGA
FAMT_LP	CGAGTCACGGTCTTTGATTTC	Genotyping
FAMT_RP	ATGCTCAACACCATGAAAACC
LBb1.3	ATTTTGCCGATTTCGGAAC
AT4G36500_P1	TGGAGGATACGAGAGAGTGAG	Semiquantitative PCR
AT4G36500_P2	TCAAGAATGGTCGGAACACC
AT4G36500_P3	CAAGATTTGGGTCTGCAATGG	Semiquantitative PCR
AT4G36500_P4	TGACTTCTGTTAACGGTAACGG
AT4G36500_P5	GCTTTTGAGCACATTTTGATTGG	Semiquantitative PCR
AT4G36500_P6	TCGACGGGTAAAGCTGATTTC
COR15A_P1	GTGAAACCGCAGATACATTGG	Semiquantitative PCR
COR15A_P2	CCCTACTTTGTGGCATCCTTAG
COR15A_P3	CCTCATCTCCCGTCACAAAC	Semiquantitative PCR
COR15A_P4	TGTACCAGCCAAGAATGAGC
COR15A_P5	TAAGGATGCCACAAAGTAGGG	Semiquantitative PCR
COR15A_P6	CGGATTGTAATTCACTGCTTGG
ACT2_P1	TCGCTGACCGTATGAGCAAAGAA	Semiquantitative PCR/real-time PCR
ACT2_P2	TGGAATGTGCTGAGGGAAGCA
ACT2_GSP	CTAATAACCAAATCAATAAAAATC	Reverse transcription
AT2G27260_P1	CCTCAACTACCAGACGTTAACC	Semiquantitative PCR
AT2G27260_P2	AGATCCCATTTACCAGAGACTTG
AT2G27260_P3	GACACTAAAGCGACTACAAAACAG	Semiquantitative PCR
AT2G27260_P4	GATTGACAAAGCTACACGGC
AT2G27260_P5	TTTTGGCTTTGGTGTGATGTT	Semiquantitative PCR
AT2G27260_P6	CCAATAACACTAACCATCCCTAATG
RGP2_P1	CCAGTGGCAAAGCTTGAGAG	Semiquantitative PCR
RGP2_P2	AGCAAGAAAGGTTCGTAAAATCAG
RGP2_P3	TCGTTCCTTTTGACCTAGTGATC	Semiquantitative PCR
RGP2_P4	CTACTGCGGACTATTTTCCCC
RGP2_P5	AAAGTTGAATTGCTATTGAGAGAGC	Semiquantitative PCR
RGP2_P6	GTAGGAAAATGGATCTTGCGC
SCL13_P1	CTCTATGAAATCTGCCCCTACTG	Semiquantitative PCR
SCL13_P2	CCCTGTGCAATCTGAAAATCG
SCL13_P3	CTACAGGTCAGATTGGGTTCTG	Semiquantitative PCR
SCL13_P4	GGCAATAAAGGAAGCTTGAGC
SCL13_P5	GGTGGGTTGCTAGTAATGAAATATAAC	Semiquantitative PCR
SCL13_P6	CATGGTTTTGTGGGTTGGTG
UBL5_P1	GACTATGAGATCCATGACGGC	Semiquantitative PCR/real-time PCR
UBL5_P2	GGTTGATATGAGTTTATGTAGGTGTC
UBL5_P3	AGCTTAAGACGCTCTAGAAATCAG	Semiquantitative PCR/real-time PCR
UBL5_P4	AGCGTACTTCGGCTAATCAAC
UBL5_P5	TTACCCATCTTCCAAATACCACTAG	Semiquantitative PCR
UBL5_P6	TGTCAAGAAAGCGTACTTCGG
SPL2_P1	TGTGTCTGTTGGCATCCTTAG	Real-time PCR
SPL2_P2	TCTGCATCTTCGGGTTCATC
SPL2_P3	TGAGGCAATGGCACTCTTG	Real-time PCR
SPL2_P4	TACTATTCTGAATCGATCTGGCG
SPL2_GSP	GGGAAACTCAATGCCTACAAC	Reverse transcription
SPL2_LP	ACAGTATCATGCGATTCTCCG	Genotyping
SPL2_RP	TTAGATTTGGGCAATGTTTCG
p745	AACGTCCGCAATGTGTTATTAAGTTGTC
NFYA5_P1	TTACCAAATCCAAAGCACCAAAG	Real-time PCR
NFYA5_P2	TCCTTAGTCAAGCTGAAAGATTCA
NFYA5_GSP	TTCTCATGTGCCTCAAGTCC	Reverse transcription
NAXT1_P1	CAGCATTGAAACAGGAAGACG	Real-time PCR
NAXT1_P2	ATATTGTGGCTAAGGCGAGAG
NAXT1_P3	CCGAGGTTTTGCTTTCACAC	Real-time PCR
NAXT1_P4	GCAGCCTCTAGTCTCACAAG
NAXT1_LP	GTTGAACGCTGCATAGTCTCC	Genotyping
NAXT1_RP	GCAGCTACGTTGTTAGGCTTG
LBb1.3	ATTTTGCCGATTTCGGAAC
AT3G45660_P1	TGTCTGGTTCAGTTTCCCG	Real-time PCR
AT3G45660_P2	AACGTAGCTAATGTTAGGCCG
NAXT1-AT3G45660_SetA_Forward	TGGCTATACAGATACAGAAACC	Semiquantitative PCR
NAXT1-AT3G45660_SetA_Reverse	ATTTCTAAAGAACAACAAGTGATG
NAXT1-AT3G45660_SetB_Forward	ATCGTTTTGTTTCTGTGATTCCTG	Semiquantitative PCR
NAXT1-AT3G45660_SetB_Reverse	GAATCTTCGCAGCTGCGATGCTC
AT3G44870_P1	GACACAAGAAATGCTTCCTCAG	Real-time PCR
AT3G44870_P2	ACACACAAACACACATCATTGC
FPA_P1	AATGGAAAGCCTATGGGTGG	Real-time PCR
FPA_P2	TTCTGTTATCGTAAGAGCCAGC
FPA_IR_P1	GCAATTGATATGAATTGGTGTCG	Real-time PCR
FPA_IR_P2	ACAAGGTTTTGCCTGCAACAAG
PIF5_P1	GATCCTCGGTTATAACAGTCGG	Real-time PCR
PIF5_P2	TCGACGTTCTTGCTTCTATCAC
PIF5_P3	ACTAGCGAGTCCCATACCTAC	Real-time PCR
PIF5_P4	GAAACCTACACGCTCGAGTAT
SRX_P1	CGTCAAATCGGTCTTCAAGTTC	Real-time PCR
SRX_P2	CGTATAGTTGGAAGCCCTAGC
SRX_P3	ACCACTTTAAGCACAAAACACTG	Real-time PCR
SRX_P4	GTCGTAACTCGTTAAACCTTTAGTG
AT2G31040_P1	GATTCAGGTTCTCACACTCGG	Real-time PCR
AT2G31040_P2	CCATGGCATCTACAGAGTTACC
AT2G31040_P3	CTGCTTGATGATTCAGAACTGC	Real-time PCR
AT2G31040_P4	AAAGCAGAGTAATAAACCCAAAGAC
